# Supplementary material for: Astronomical calibration of the middle Cambrian in Baltica: Global carbon cycle synchronization and climate dynamics
Source: Research Square preprint supplement (doi:10.21203/rs.3.rs-7509865/v1), 2025-09-11
Supplement: Supplementary file 1 [file a3e3211c198bf8f3cf96b1c3.pdf]

# Milankovitch forcing and Cambrian climate dynamics: Integrated stratigraphy of the Miaolingian Epoch in Baltica

Authors: Valentin JAMART, Damien PAS, Linda A. HINNOV, Jorge E. SPANGENBERG, Thierry ADATTE, Arne T. NIELSEN, Niels H. SCHOVSBO, Nicolas R. THIBAUT, Michiel ARTS, Allison C. DALEY

## Work environment, packages and data loading

```
#Setting of the work environment
setwd("C:/Users/vjamart/OneDrive - Université de Lausanne/Bureau/Draft Alum Shale/R code/html")

#Loading of the packages that will be used in this study
library(Waverider)
library(astrochron)
```

Welcome to astrochron v1.5 (2025-04-28)

```
library(matrixStats)
```

Warning: le package 'matrixStats' a été compilé avec la version R 4.2.3

```
#Loading of the dataset file
Alb <- read.csv("Z score.csv", sep=";")
```

## Step 1: Data selection, resampling and detrending

### 1.1. Selecting Titanium data

```
# Selection of the data
alb_Ti <- cbind(Alb$DepthAdj,Alb$Ti)
alb_Ti <- na.omit(alb_Ti)
alb_Ti[!is.finite(alb_Ti)] <- NA
alb_Ti <- na.omit(alb_Ti)

#Isolation of the studied time interval
alb_Ti <- iso(dat=alb_Ti, xmin=73.452, xmax=100)
```

----- ISOLATE STRATIGRAPHIC DATA BY LOCATION -----

- \* Number of data points= 30577
- \* Number of columns= 2
- \* Minimum= 62.111 , Maximum= 93.61
- \* Isolating data between 73.452 and 100
- \* Number of data points following culling= 19312

**Stratigraphic Series**

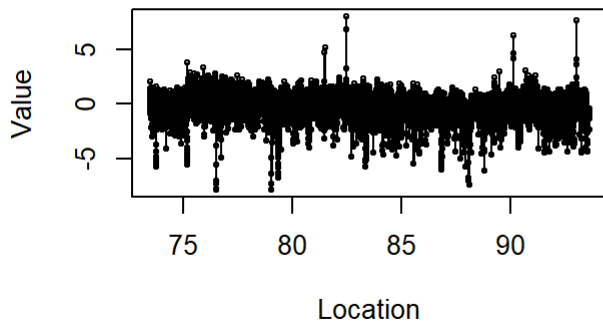

**Distribution of Isolated Values**

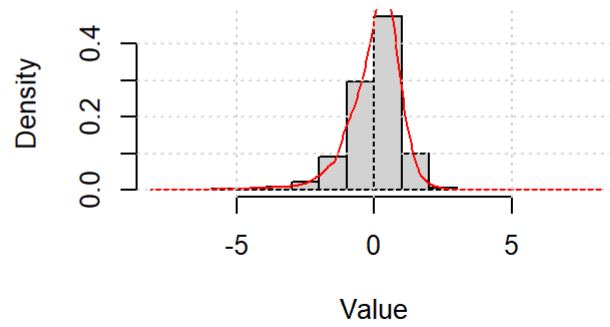

**Boxplot for Isolated Values**

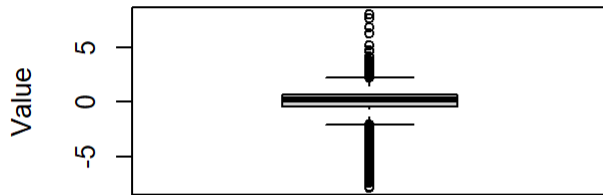

**Normal Q-Q Plot**

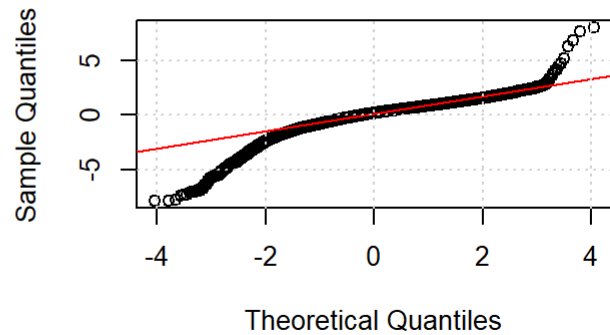

```
alb_Ti <- linterp(alb_Ti, genplot=T)
```

----- APPLYING PIECEWISE-LINEAR INTERPOLATION TO STRATIGRAPHIC SERIES -----

- \* Number of samples= 19312
- \* Determining median sampling interval for series
- \* Will interpolate to median sampling interval of 0.001
- \* New number of samples= 20158

**Raw (black) and Interpolated (red) Data**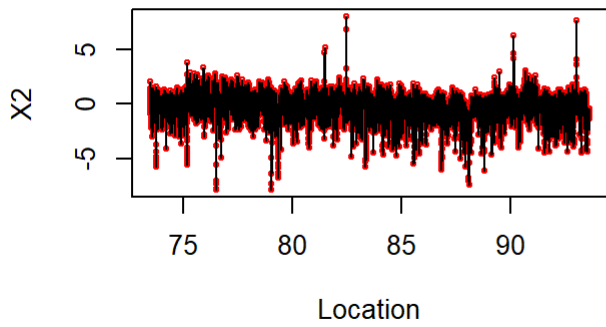**Distribution of Interpolated Values**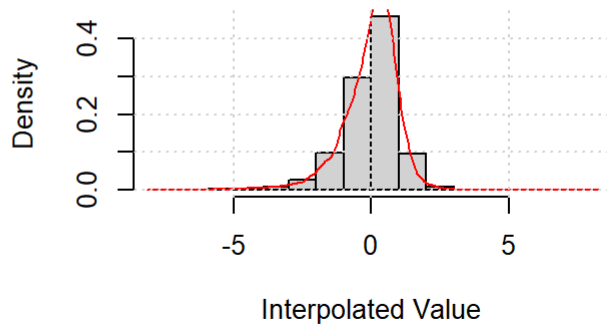**Boxplot of Interpolated Values**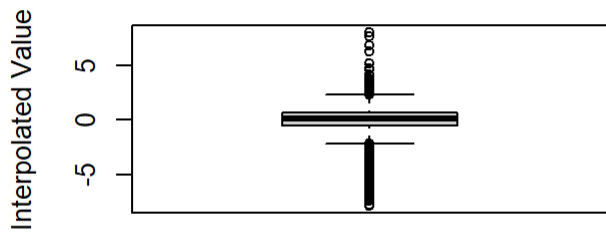**Normal Q-Q Plot**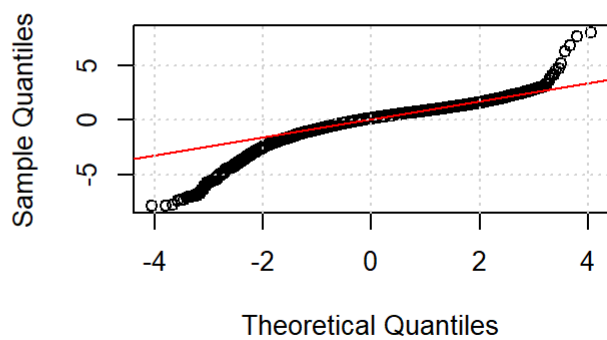

```
#Saving of the 1 mm (non resampled) Ti series
alb_Ti_1mm<-linterp(alb_Ti, genplot=T)
```

----- APPLYING PIECEWISE-LINEAR INTERPOLATION TO STRATIGRAPHIC SERIES -----

- \* Number of samples= 20158
- \* Determining median sampling interval for series
- \* Will interpolate to median sampling interval of 0.001
- \* New number of samples= 20158

**Raw (black) and Interpolated (red) Data**

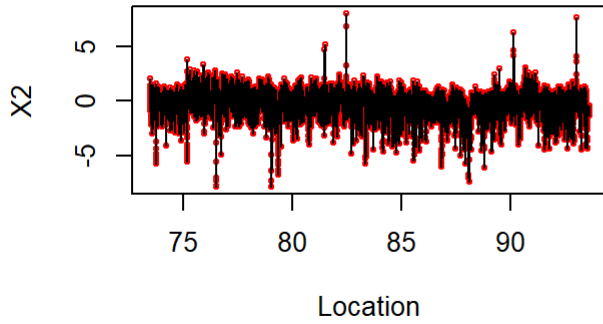

**Distribution of Interpolated Values**

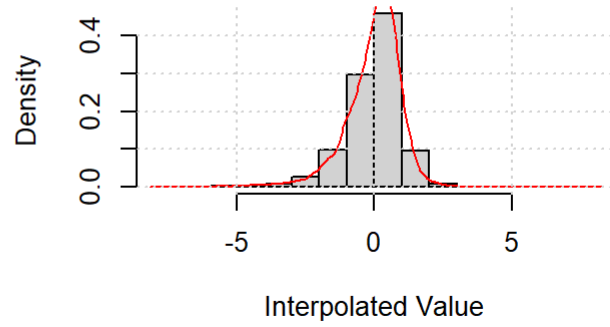

**Boxplot of Interpolated Values**

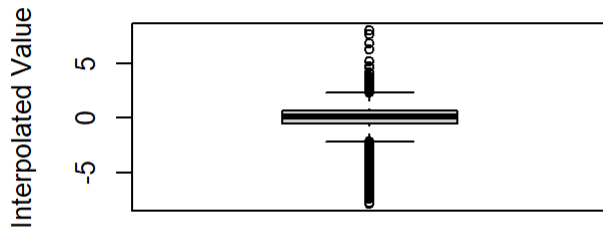

**Normal Q-Q Plot**

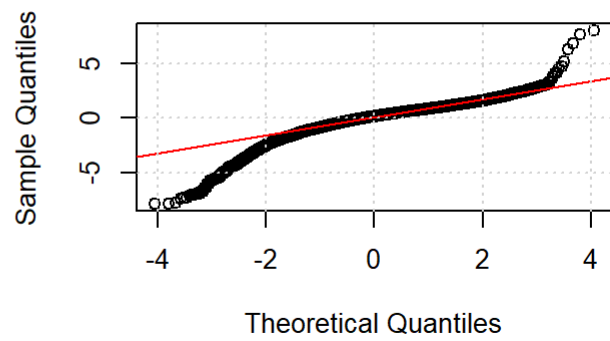

```
#Resampling of the Ti series every 5 mm  
alb_Ti <- linterp(alb_Ti, dt=0.005, genplot=T)
```

----- APPLYING PIECEWISE-LINEAR INTERPOLATION TO STRATIGRAPHIC SERIES -----

- \* Number of samples= 20158
- \* New number of samples= 4032



**Raw (black) and Interpolated (red) Data**

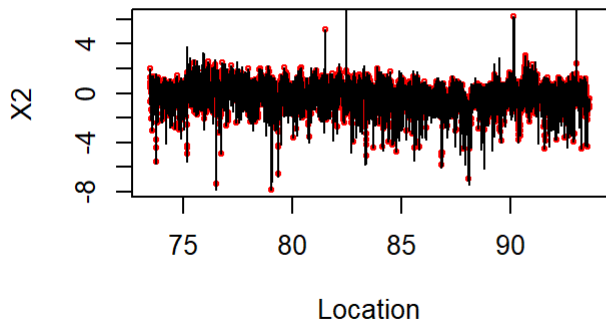

**Distribution of Interpolated Values**

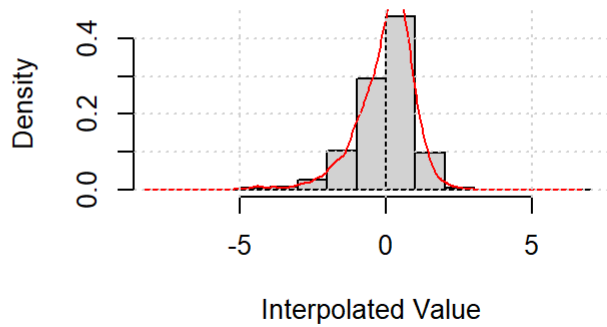

**Boxplot of Interpolated Values**

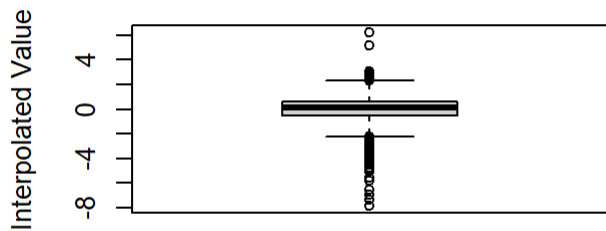

**Normal Q-Q Plot**

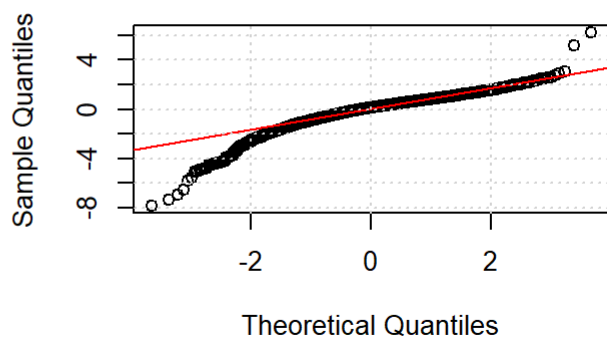

```
#Saving of the non detrended Ti series resampled every 5 mm  
alb_Ti_ndet <- linterp(alb_Ti, genplot=T)
```

----- APPLYING PIECEWISE-LINEAR INTERPOLATION TO STRATIGRAPHIC SERIES -----

- \* Number of samples= 4032
- \* Determining median sampling interval for series
- \* Will interpolate to median sampling interval of 0.005
- \* New number of samples= 4032

**Raw (black) and Interpolated (red) Data**

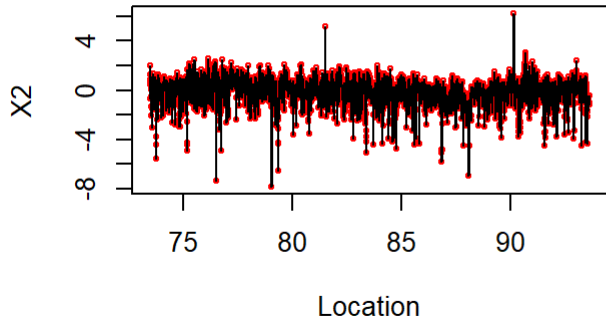

**Distribution of Interpolated Values**

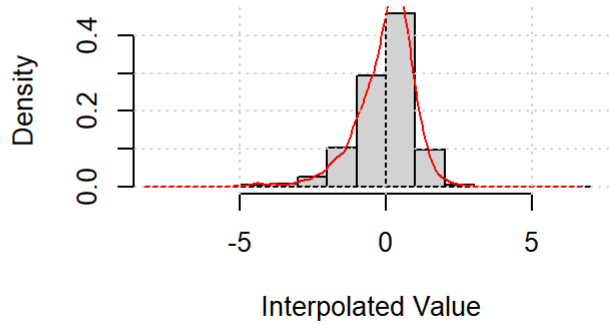

**Boxplot of Interpolated Values**

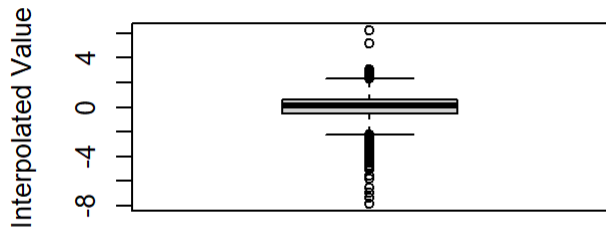

**Normal Q-Q Plot**

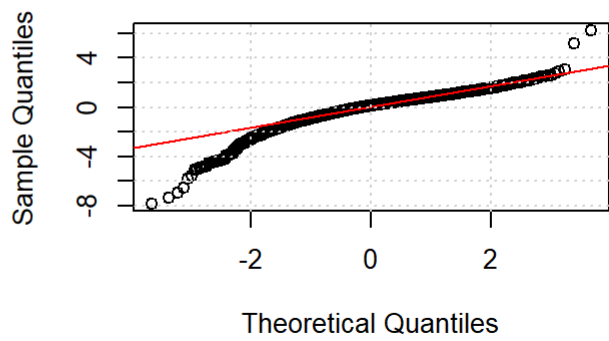

```
#Plotting of the non detrended 5mm Ti series
```

```
plot(alb_Ti_ndet, type = "l", xlab = "Depth Adjusted (m)", ylab = "Ti Z score non-detrended")
```

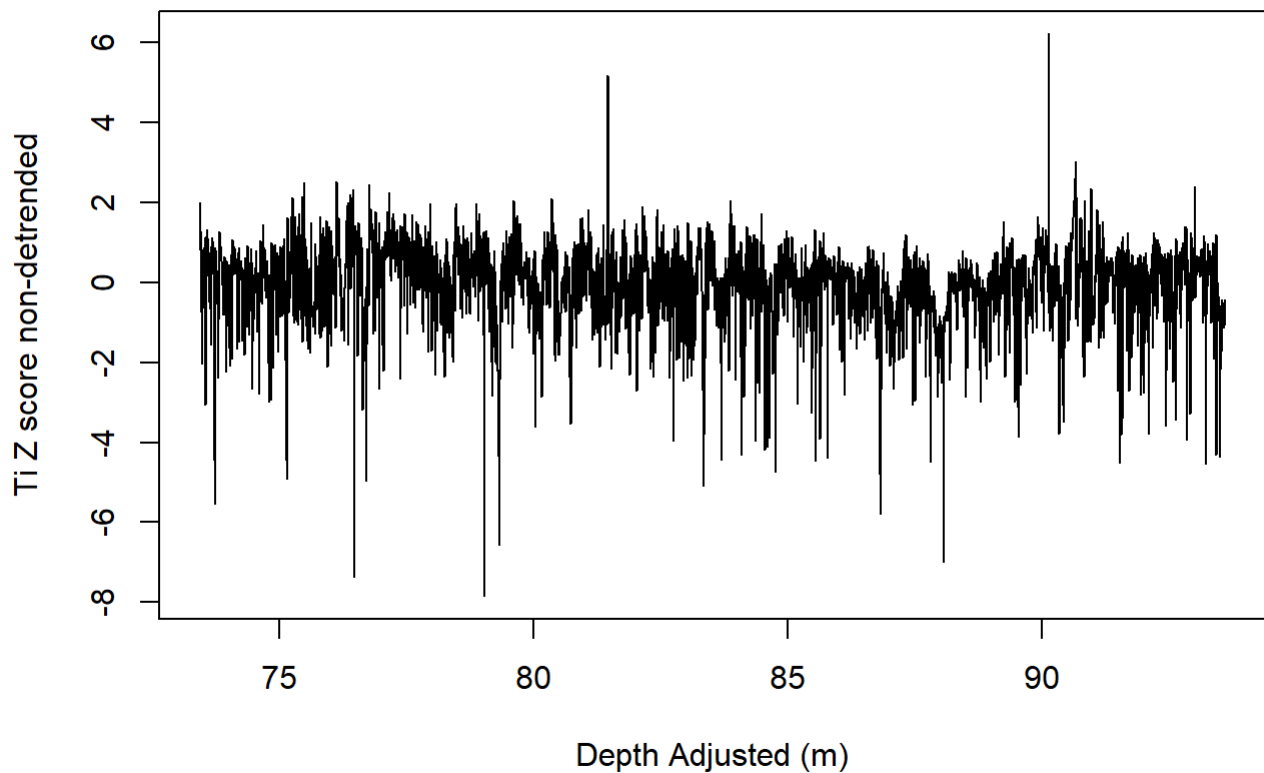

The Ti data have been selected, from the composite core, extending from 73.452 m (= anchoring depth with Zhao et al (2022b) dataset) to 93.609 m (= end of the Alum Shale Formation). Then the data are interpolated

to ensure continuity of the Ti record every 5 mm. These data are not detrended and will be used in the Continuous Wavelet analysis (CWT).

## 1.2. Detrending of the Ti data

```
#Detrending (20% LOWESS) of the Ti series resampled every 5 mm
alb_Ti <- noLow(alb_Ti, smooth = 0.2, output = 1, genplot = T)
```

----- REMOVING LOWESS SMOOTHER FROM STRATIGRAPHIC SERIES -----

Call:

```
loess(formula = (dat[, 2]) ~ dat[, 1], span = smooth, degree = 1)
```

Number of Observations: 4032

Equivalent Number of Parameters: 8.17

Residual Standard Error: 1.015

Trace of smoother matrix: 9.68 (exact)

Control settings:

```
span      : 0.2
degree    : 1
family    : gaussian
surface   : interpolate    cell = 0.2
normalize : TRUE
parametric: FALSE
drop.square: FALSE
```

**Data with LOWESS Fit**

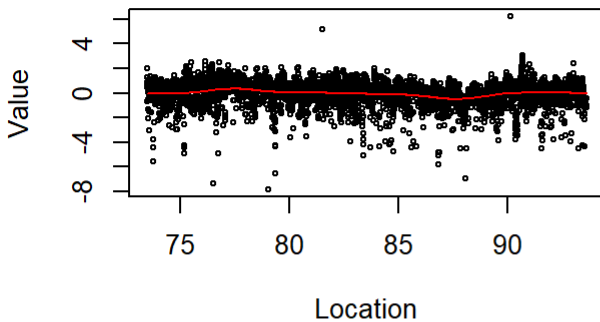

**Residuals from LOWESS Fit**

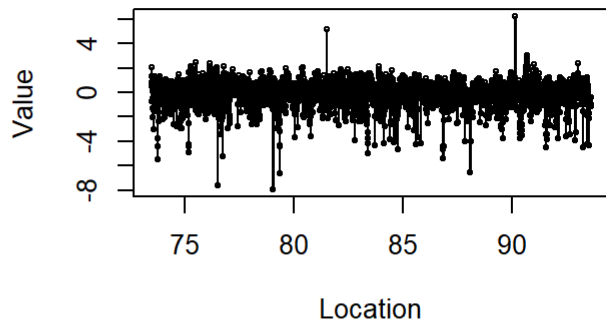

**Distribution of Residual Values**

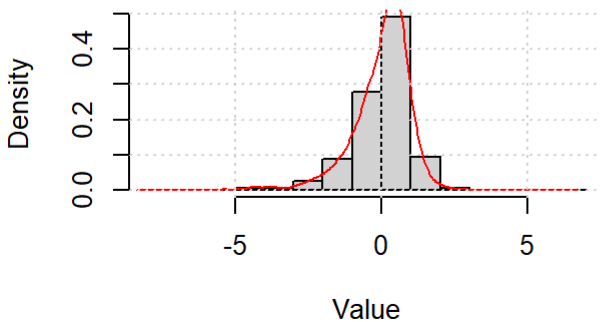

**Boxplot of Residual Values**

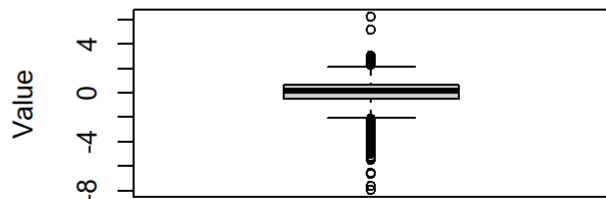

```
alb_Ti <- linterp(alb_Ti, genplot=T)
```

----- APPLYING PIECEWISE-LINEAR INTERPOLATION TO STRATIGRAPHIC SERIES -----

- \* Number of samples= 4032
- \* Determining median sampling interval for series
- \* Will interpolate to median sampling interval of 0.005
- \* New number of samples= 4032

**Raw (black) and Interpolated (red) Data**

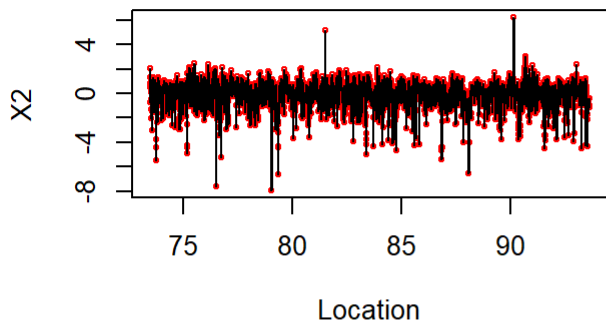

**Distribution of Interpolated Values**

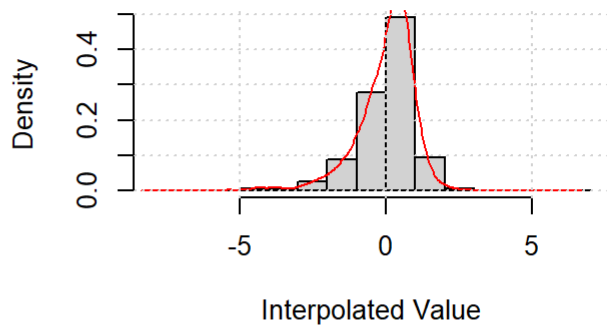

**Boxplot of Interpolated Values**

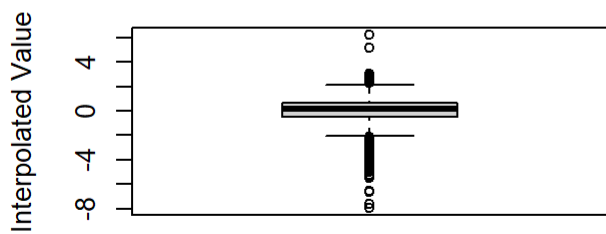

**Normal Q-Q Plot**

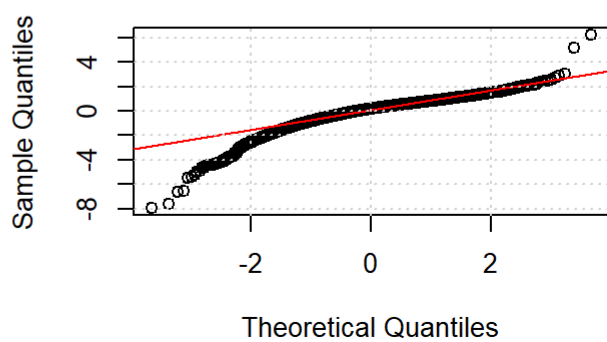

```
plot(alb_Ti, type = "l", xlab = "Depth Adjusted (m)", ylab = "Ti Z score detrended")
```

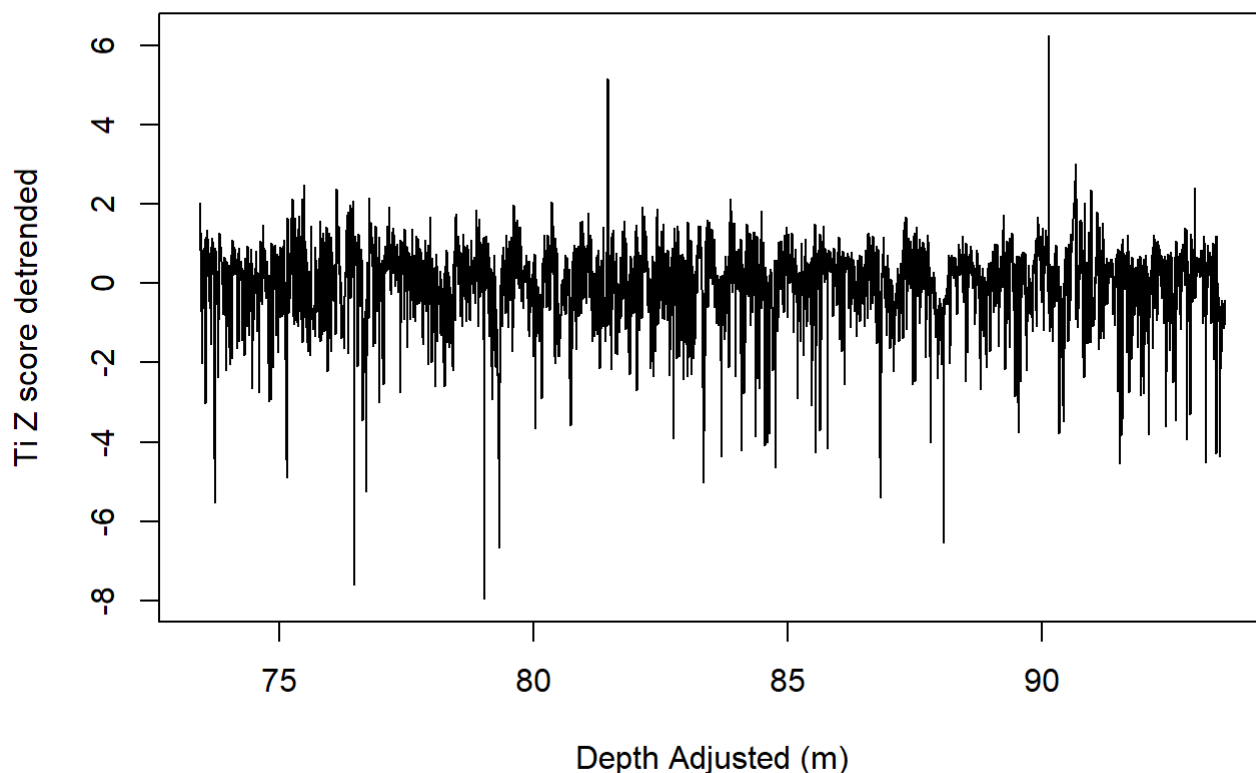

The 5mm spaced Ti series is detrended using a 20% LOWESS regression. These data will be used for step 2 to 10 of the protocol. The step 1 of the protocol was also performed for the other detrital elements (Al, Si, K and Zr)

## Step 2: MTM in depth domain

### 2.1. MTM on the non-detrended dataset

```
alb_Ti_MTM_ndet<-mtm(alb_Ti_ndet, xmax=15, siglevel = 0.9,ar1 = T, tbw= 2, output = 1)
```

----- PERFORMING Multitaper Spectral Analysis -----

- \* Number of data points in stratigraphic series: 4032
- \* Stratigraphic series length (space or time): 20.155
- \* Sampling interval (space or time): 0.005
- \* Will use default setting of 3 DPSS tapers
- \* Mean value subtracted= -0.03819509
- \* Linear trend NOT subtracted
- \* Nyquist frequency: 100
- \* Rayleigh frequency: 0.04960317
- \* MTM Power spectrum bandwidth resolution (halfwidth): 0.09920635
- \* Padded to 20160 points
- \* Estimated AR1 coefficient = 0.4678053
- \* Searching for significant spectral peaks that satisfy 90 % CL requirements outlined in Meyers (2012):
- \* Number of significant F-test peaks identified = 92

| ID | / Frequency | / Period   | / Harmonic_CL | / Rednoise_CL |
|----|-------------|------------|---------------|---------------|
| 1  | 0.04960317  | 20.16      | 99.59413      | 100           |
| 2  | 0.1488095   | 6.72       | 90.52508      | 99.99988      |
| 3  | 0.2380952   | 4.2        | 95.77769      | 99.63641      |
| 4  | 0.7936508   | 1.26       | 99.6483       | 99.72414      |
| 5  | 0.9126984   | 1.095652   | 99.90369      | 99.76809      |
| 6  | 1.150794    | 0.8689655  | 99.02863      | 99.96726      |
| 7  | 1.25        | 0.8        | 98.28226      | 100           |
| 8  | 1.359127    | 0.7357664  | 95.51838      | 98.69361      |
| 9  | 1.458333    | 0.6857143  | 98.10039      | 97.33287      |
| 10 | 1.547619    | 0.6461538  | 93.83247      | 94.56589      |
| 11 | 1.646825    | 0.6072289  | 98.11976      | 95.44981      |
| 12 | 1.746032    | 0.5727273  | 98.2977       | 98.37743      |
| 13 | 1.964286    | 0.5090909  | 96.41317      | 89.16807      |
| 14 | 2.093254    | 0.4777251  | 98.02182      | 61.40152      |
| 15 | 2.261905    | 0.4421053  | 98.61392      | 94.04487      |
| 16 | 2.678571    | 0.3733333  | 90.52717      | 87.76271      |
| 17 | 2.81746     | 0.3549296  | 90.21642      | 89.00479      |
| 18 | 2.956349    | 0.338255   | 99.80688      | 97.86445      |
| 19 | 3.333333    | 0.3        | 95.41258      | 94.92955      |
| 20 | 3.44246     | 0.2904899  | 94.96416      | 72.0446       |
| 21 | 4.236111    | 0.2360656  | 90.59066      | 92.04306      |
| 22 | 5.228175    | 0.1912713  | 90.0769       | 95.19748      |
| 23 | 5.704365    | 0.1753043  | 97.37866      | 82.19038      |
| 24 | 5.853175    | 0.1708475  | 99.11178      | 61.88645      |
| 25 | 7.103175    | 0.1407821  | 98.71909      | 58.91435      |
| 26 | 7.202381    | 0.138843   | 93.36762      | 93.5992       |
| 27 | 12.5496     | 0.07968379 | 98.55084      | 64.87143      |
| 28 | 12.65873    | 0.07899687 | 92.19144      | 77.36012      |
| 29 | 25          | 0.04       | 97.3433       | 98.71976      |
| 30 | 28.75       | 0.03478261 | 99.35968      | 81.04829      |
| 31 | 36.37897    | 0.02748841 | 93.34859      | 66.00714      |
| 32 | 36.49802    | 0.02739875 | 96.30149      | 67.03294      |
| 33 | 43.29365    | 0.02309808 | 99.42692      | 86.20213      |
| 34 | 44.6627     | 0.02239005 | 91.44214      | 93.32972      |
| 35 | 50.90278    | 0.01964529 | 94.31977      | 88.83037      |
| 36 | 53.5119     | 0.01868743 | 95.83838      | 91.38573      |
| 37 | 54.4246     | 0.01837404 | 93.35112      | 99.1812       |
| 38 | 56.4881     | 0.01770285 | 97.75266      | 89.76485      |
| 39 | 57.39087    | 0.01742437 | 90.87104      | 57.77427      |
| 40 | 57.60913    | 0.01735836 | 94.16765      | 73.1126       |
| 41 | 57.95635    | 0.01725436 | 98.8449       | 88.00713      |
| 42 | 58.11508    | 0.01720724 | 97.76301      | 96.51954      |
| 43 | 58.22421    | 0.01717499 | 96.76889      | 79.12464      |
| 44 | 59.31548    | 0.01685901 | 92.31114      | 83.25253      |
| 45 | 59.51389    | 0.0168028  | 92.95096      | 83.08796      |
| 46 | 60.66468    | 0.01648406 | 95.20887      | 97.91906      |
| 47 | 61.06151    | 0.01637693 | 97.26079      | 59.79055      |
| 48 | 61.21032    | 0.01633712 | 96.41056      | 70.3925       |
| 49 | 61.33929    | 0.01630277 | 99.90043      | 91.64441      |
| 50 | 61.43849    | 0.01627644 | 97.27363      | 93.0498       |
| 51 | 64.62302    | 0.01547436 | 92.17849      | 96.06461      |
| 52 | 65.87302    | 0.01518072 | 94.95824      | 61.38345      |
| 53 | 67.86706    | 0.01473469 | 91.52643      | 98.95389      |
| 54 | 67.98611    | 0.01470889 | 96.36932      | 91.70161      |
| 55 | 70.82341    | 0.01411962 | 92.4982       | 93.21737      |
| 56 | 71.00198    | 0.01408411 | 95.82177      | 80.20875      |
| 57 | 73.15476    | 0.01366965 | 92.54873      | 73.90308      |

|    |          |            |          |          |
|----|----------|------------|----------|----------|
| 58 | 74.89087 | 0.01335276 | 99.1105  | 95.01699 |
| 59 | 75.77381 | 0.01319717 | 98.99207 | 97.37065 |
| 60 | 77.07341 | 0.01297464 | 97.10868 | 73.67353 |
| 61 | 78.65079 | 0.01271443 | 93.08389 | 96.35031 |
| 62 | 79.89087 | 0.01251707 | 98.51305 | 88.55408 |
| 63 | 80.17857 | 0.01247216 | 96.8899  | 84.18897 |
| 64 | 80.60516 | 0.01240615 | 96.57845 | 85.75422 |
| 65 | 80.77381 | 0.01238025 | 94.00894 | 81.35132 |
| 66 | 81.875   | 0.01221374 | 94.37419 | 65.41283 |
| 67 | 81.99405 | 0.01219601 | 97.83034 | 63.22457 |
| 68 | 82.2123  | 0.01216363 | 99.6475  | 74.23975 |
| 69 | 82.33135 | 0.01214604 | 91.42259 | 88.0338  |
| 70 | 82.61905 | 0.01210375 | 94.18016 | 99.50291 |
| 71 | 83.80952 | 0.01193182 | 92.76588 | 98.59736 |
| 72 | 84.59325 | 0.01182127 | 94.44594 | 96.96859 |
| 73 | 85.5754  | 0.0116856  | 96.13289 | 58.66473 |
| 74 | 86.8254  | 0.01151737 | 93.10324 | 99.01141 |
| 75 | 87.14286 | 0.01147541 | 94.39685 | 85.69028 |
| 76 | 87.29167 | 0.01145585 | 95.07262 | 72.84607 |
| 77 | 87.48016 | 0.01143116 | 93.38032 | 63.57838 |
| 78 | 88.10516 | 0.01135007 | 97.96073 | 99.82218 |
| 79 | 89.33532 | 0.01119378 | 91.81732 | 96.05213 |
| 80 | 91.25992 | 0.01095771 | 99.14639 | 82.01627 |
| 81 | 91.51786 | 0.01092683 | 99.20717 | 98.70252 |
| 82 | 91.72619 | 0.01090201 | 99.51691 | 94.60788 |
| 83 | 93.03571 | 0.01074856 | 99.57182 | 86.93861 |
| 84 | 93.64087 | 0.0106791  | 92.99375 | 96.96892 |
| 85 | 93.95833 | 0.01064302 | 94.8374  | 98.20012 |
| 86 | 94.09722 | 0.01062731 | 94.58227 | 95.31293 |
| 87 | 94.40476 | 0.01059269 | 90.78054 | 79.38122 |
| 88 | 95.13889 | 0.01051095 | 93.32935 | 94.5039  |
| 89 | 95.50595 | 0.01047055 | 90.6481  | 96.25297 |
| 90 | 97.66865 | 0.0102387  | 97.14167 | 72.0247  |
| 91 | 98.90873 | 0.01011033 | 90.62833 | 59.48612 |
| 92 | 99.00794 | 0.0101002  | 90.26233 | 79.78084 |

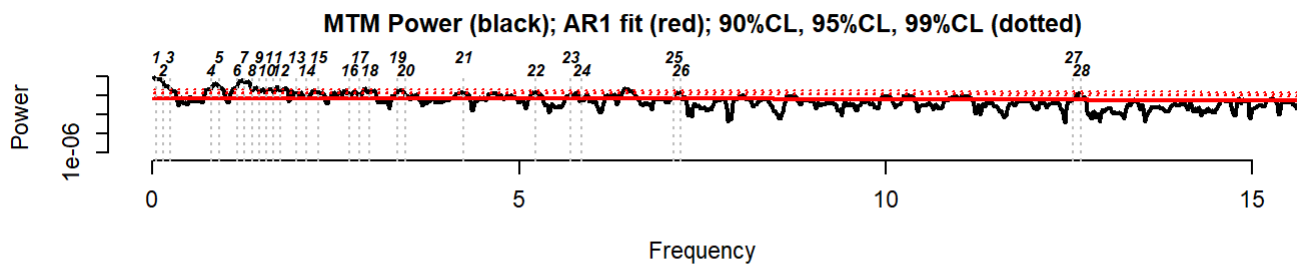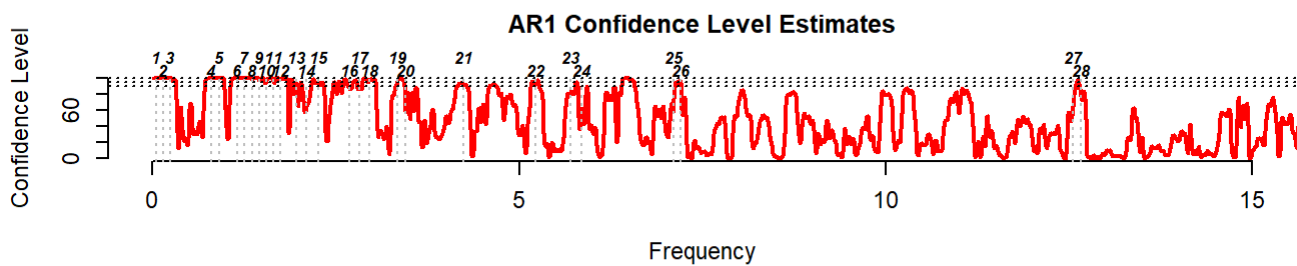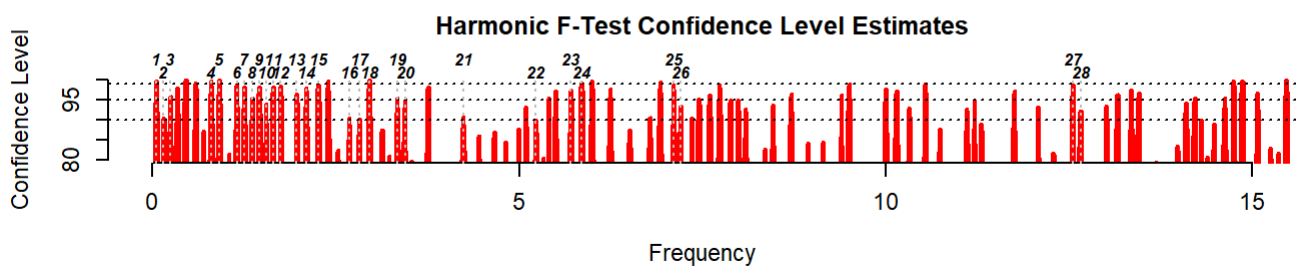

```
alb_Ti_MTM_ndet <- iso(dat=alb_Ti_MTM_ndet,xmin=0,xmax=15, genplot=F)
```

----- ISOLATE STRATIGRAPHIC DATA BY LOCATION -----

```
* Number of data points= 10079
* Number of columns= 8
* Minimum= 0.009920635 , Maximum= 99.99008
* Isolating data between 0 and 15
* Number of data points following culling= 1511
```

```
plot(alb_Ti_MTM_ndet$Frequency,
     alb_Ti_MTM_ndet$Power,
     type = 'l',
     xlab = "Frequency (cycles/m)",
     ylab = "Variance"
)
```

```
lines(alb_Ti_MTM_ndet$Frequency,
      alb_Ti_MTM_ndet$AR1_fit,
      type = 'l',
      col = 'black',
      lwd = 2
)
```

```
lines(alb_Ti_MTM_ndet$Frequency,
      alb_Ti_MTM_ndet$AR1_90_power,
      type = 'l',
      col = 'red',
      lwd = 2
)
```



```

lines(alb_Ti_MTM_ndet$Frequency,
      alb_Ti_MTM_ndet$AR1_95_power,
      type = 'l',
      col = 'blue',
      lwd = 2
    )

lines(alb_Ti_MTM_ndet$Frequency,
      alb_Ti_MTM_ndet$AR1_99_power,
      type = 'l',
      col = 'green',
      lwd = 2
    )

```

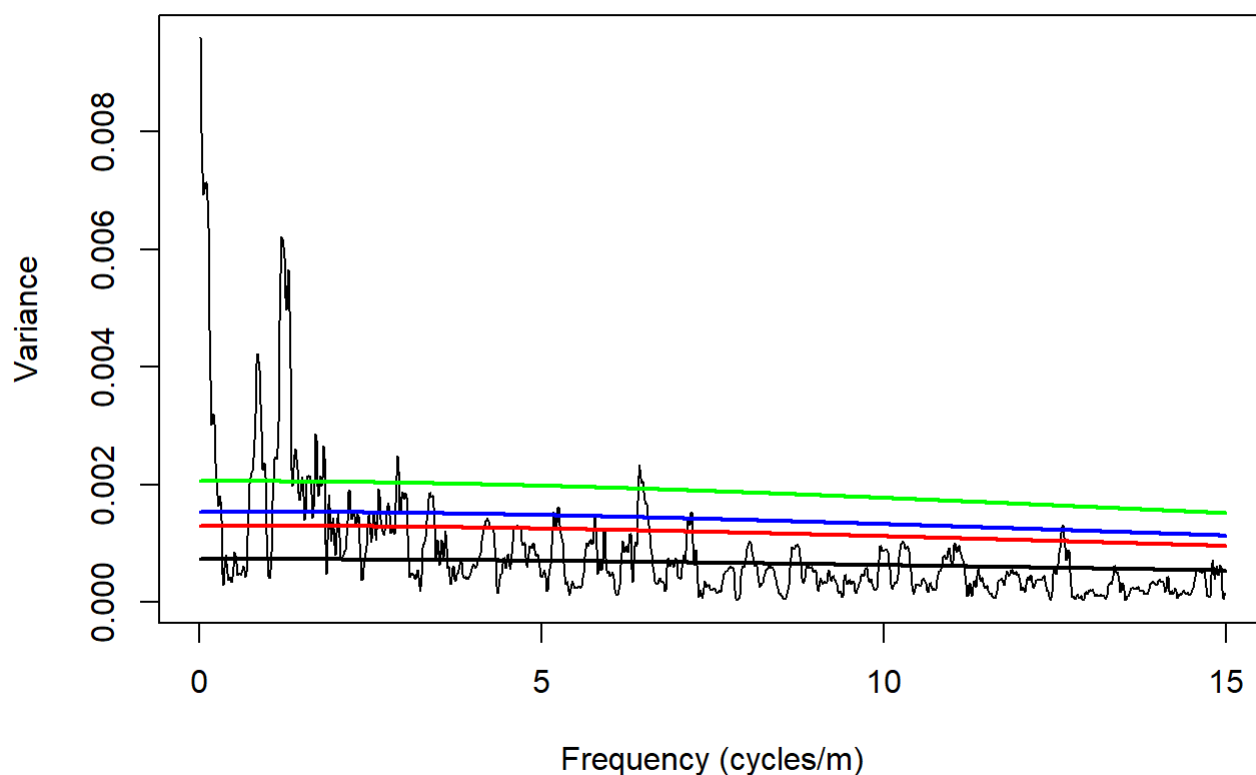

The 2 pi-MTM on the non-detrended data is performed to show the entire range of cyclicities in the signal. This MTM is not used afterward.

## 2.2. MTM on the detrended dataset

```

alb_Ti_MTM <- mtm(alb_Ti, xmax=15, siglevel = 0.9, ar1 = T, tbw= 2, output = 1)

```

```

----- PERFORMING Multitaper Spectral Analysis -----
* Number of data points in stratigraphic series: 4032
* Stratigraphic series length (space or time): 20.155
* Sampling interval (space or time): 0.005
* Will use default setting of 3 DPSS tapers
* Mean value subtracted= 4.069401e-05
* Linear trend NOT subtracted

```

\* Nyquist frequency: 100  
 \* Rayleigh frequency: 0.04960317  
 \* MTM Power spectrum bandwidth resolution (halfwidth): 0.09920635  
 \* Padded to 20160 points  
 \* Estimated AR1 coefficient = 0.4427859

\* Searching for significant spectral peaks that satisfy 90 % CL requirements outlined in Meyers (2012):

\* Number of significant F-test peaks identified = 94

| ID | / Frequency      | / Period     | / Harmonic_CL | / Rednoise_CL |
|----|------------------|--------------|---------------|---------------|
| 1  | 0.7936508        | 1.26         | 99.6495       | 99.9071       |
| 2  | 0.9126984        | 1.095652     | 99.90678      | 99.90939      |
| 3  | 1.150794         | 0.8689655    | 99.05213      | 99.99092      |
| 4  | 1.25 0.8         | 98.30687     | 100           |               |
| 5  | 1.359127         | 0.7357664    | 95.50549      | 99.41661      |
| 6  | 1.458333         | 0.6857143    | 98.12654      | 98.55564      |
| 7  | 1.547619         | 0.6461538    | 93.79633      | 96.96442      |
| 8  | 1.646825         | 0.6072289    | 98.12533      | 97.42249      |
| 9  | 1.746032         | 0.5727273    | 98.30366      | 99.24096      |
| 10 | 1.964286         | 0.5090909    | 96.34805      | 93.20886      |
| 11 | 2.093254         | 0.4777251    | 97.98995      | 68.89833      |
| 12 | 2.261905         | 0.4421053    | 98.62524      | 96.54462      |
| 13 | 2.678571         | 0.3733333    | 90.55385      | 91.9462       |
| 14 | 2.81746          | 0.3549296    | 90.19723      | 92.8981       |
| 15 | 2.956349         | 0.338255     | 99.80865      | 98.932        |
| 16 | 3.333333         | 0.3 95.41094 | 97.09887      |               |
| 17 | 3.44246          | 0.2904899    | 94.96645      | 78.86869      |
| 18 | 4.236111         | 0.2360656    | 90.58225      | 95.06536      |
| 19 | 5.228175         | 0.1912713    | 90.09819      | 97.21911      |
| 20 | 5.704365         | 0.1753043    | 97.37723      | 87.29627      |
| 21 | 5.853175         | 0.1708475    | 99.11158      | 69.01658      |
| 22 | 6.240079         | 0.1602544    | 97.67422      | 84.33962      |
| 23 | 7.103175         | 0.1407821    | 98.72186      | 65.90099      |
| 24 | 7.202381         | 0.138843     | 93.3723       | 96.0572       |
| 25 | 10.31746         | 0.09692308   | 92.89927      | 86.07821      |
| 26 | 11.10119         | 0.09008043   | 92.65311      | 88.88133      |
| 27 | 12.5496          | 0.07968379   | 98.55134      | 70.54842      |
| 28 | 12.65873         | 0.07899687   | 92.1856       | 82.09713      |
| 29 | 17.09325         | 0.05850261   | 94.11179      | 68.76633      |
| 30 | 17.8373          | 0.05606229   | 90.02154      | 88.05182      |
| 31 | 25 0.04          | 97.34224     | 99.05331      |               |
| 32 | 28.75 0.03478261 | 99.3598      | 82.94557      |               |
| 33 | 36.37897         | 0.02748841   | 93.34558      | 67.44022      |
| 34 | 36.49802         | 0.02739875   | 96.30253      | 68.38105      |
| 35 | 43.29365         | 0.02309808   | 99.42679      | 86.71654      |
| 36 | 44.6627          | 0.02239005   | 91.43392      | 93.59203      |
| 37 | 50.90278         | 0.01964529   | 94.31732      | 88.98035      |
| 38 | 53.5119          | 0.01868743   | 95.83561      | 91.34791      |
| 39 | 54.4246          | 0.01837404   | 93.35017      | 99.19354      |
| 40 | 56.4881          | 0.01770285   | 97.75355      | 89.75403      |
| 41 | 57.39087         | 0.01742437   | 90.87208      | 57.797        |
| 42 | 57.60913         | 0.01735836   | 94.16682      | 73.16123      |
| 43 | 57.95635         | 0.01725436   | 98.8438       | 87.94543      |
| 44 | 58.11508         | 0.01720724   | 97.76266      | 96.49958      |
| 45 | 58.22421         | 0.01717499   | 96.77038      | 79.02898      |
| 46 | 59.31548         | 0.01685901   | 92.31666      | 83.12247      |
| 47 | 59.51389         | 0.0168028    | 92.95351      | 82.93598      |
| 48 | 60.66468         | 0.01648406   | 95.20807      | 97.90035      |

|    |          |            |          |          |
|----|----------|------------|----------|----------|
| 49 | 61.06151 | 0.01637693 | 97.25952 | 59.65102 |
| 50 | 61.21032 | 0.01633712 | 96.41152 | 70.29164 |
| 51 | 61.33929 | 0.01630277 | 99.90038 | 91.56283 |
| 52 | 61.43849 | 0.01627644 | 97.2732  | 92.98992 |
| 53 | 64.62302 | 0.01547436 | 92.18034 | 95.99514 |
| 54 | 65.87302 | 0.01518072 | 94.95728 | 60.97955 |
| 55 | 67.86706 | 0.01473469 | 91.5305  | 98.91116 |
| 56 | 67.98611 | 0.01470889 | 96.37001 | 91.48216 |
| 57 | 70.82341 | 0.01411962 | 92.50066 | 93.04393 |
| 58 | 71.00198 | 0.01408411 | 95.82738 | 79.77178 |
| 59 | 73.15476 | 0.01366965 | 92.5475  | 73.40234 |
| 60 | 74.89087 | 0.01335276 | 99.11115 | 94.81942 |
| 61 | 75.77381 | 0.01319717 | 98.99135 | 97.25962 |
| 62 | 77.07341 | 0.01297464 | 97.1098  | 73.18008 |
| 63 | 78.65079 | 0.01271443 | 93.09069 | 96.18004 |
| 64 | 79.89087 | 0.01251707 | 98.51331 | 88.16902 |
| 65 | 80.17857 | 0.01247216 | 96.89047 | 83.7865  |
| 66 | 80.60516 | 0.01240615 | 96.57814 | 85.30011 |
| 67 | 80.77381 | 0.01238025 | 94.01293 | 80.79683 |
| 68 | 81.875   | 0.01221374 | 94.37741 | 64.65222 |
| 69 | 81.99405 | 0.01219601 | 97.83026 | 62.50613 |
| 70 | 82.2123  | 0.01216363 | 99.64703 | 73.589   |
| 71 | 82.33135 | 0.01214604 | 91.42229 | 87.60278 |
| 72 | 82.61905 | 0.01210375 | 94.18218 | 99.46475 |
| 73 | 83.80952 | 0.01193182 | 92.76434 | 98.51632 |
| 74 | 84.59325 | 0.01182127 | 94.4466  | 96.81177 |
| 75 | 85.5754  | 0.0116856  | 96.13613 | 57.87317 |
| 76 | 86.8254  | 0.01151737 | 93.10284 | 98.94794 |
| 77 | 87.14286 | 0.01147541 | 94.39533 | 85.17613 |
| 78 | 87.29167 | 0.01145585 | 95.06977 | 72.27986 |
| 79 | 87.48016 | 0.01143116 | 93.37054 | 62.7484  |
| 80 | 88.10516 | 0.01135007 | 97.95976 | 99.80612 |
| 81 | 89.33532 | 0.01119378 | 91.8167  | 95.82547 |
| 82 | 91.25992 | 0.01095771 | 99.14693 | 81.4381  |
| 83 | 91.51786 | 0.01092683 | 99.20682 | 98.60804 |
| 84 | 91.72619 | 0.01090201 | 99.51717 | 94.34934 |
| 85 | 93.03571 | 0.01074856 | 99.57157 | 86.42848 |
| 86 | 93.64087 | 0.0106791  | 92.99197 | 96.78454 |
| 87 | 93.95833 | 0.01064302 | 94.83938 | 98.07256 |
| 88 | 94.09722 | 0.01062731 | 94.58366 | 95.04817 |
| 89 | 94.40476 | 0.01059269 | 90.77981 | 78.9516  |
| 90 | 95.13889 | 0.01051095 | 93.32958 | 94.27396 |
| 91 | 95.50595 | 0.01047055 | 90.64873 | 96.05761 |
| 92 | 97.66865 | 0.0102387  | 97.14153 | 71.41045 |
| 93 | 98.90873 | 0.01011033 | 90.6295  | 58.61966 |
| 94 | 99.00794 | 0.0101002  | 90.26207 | 79.29464 |

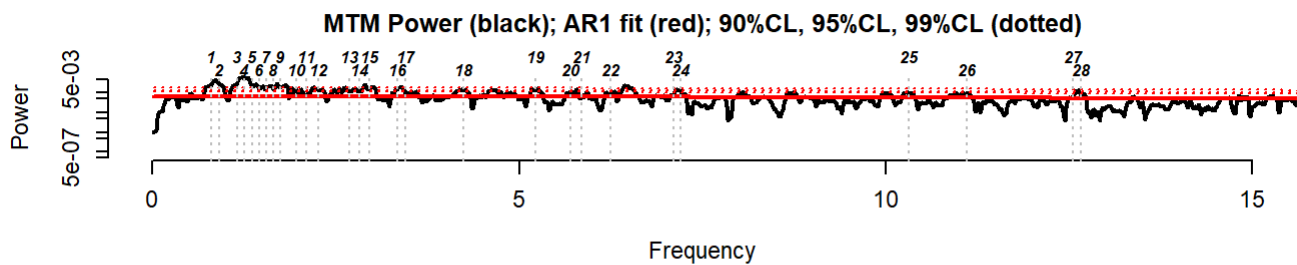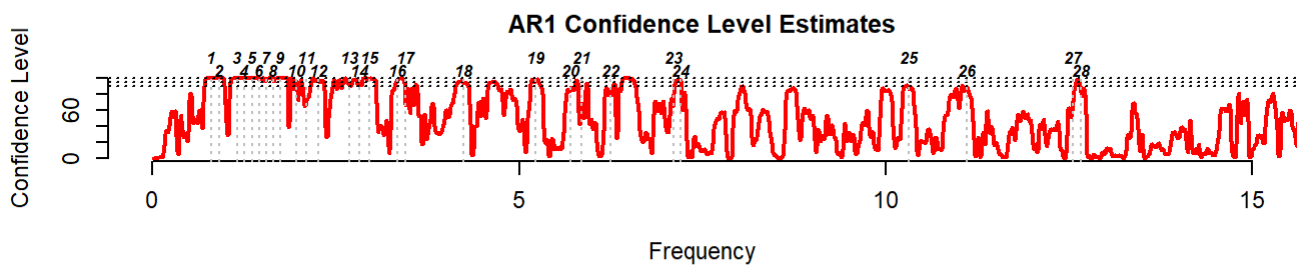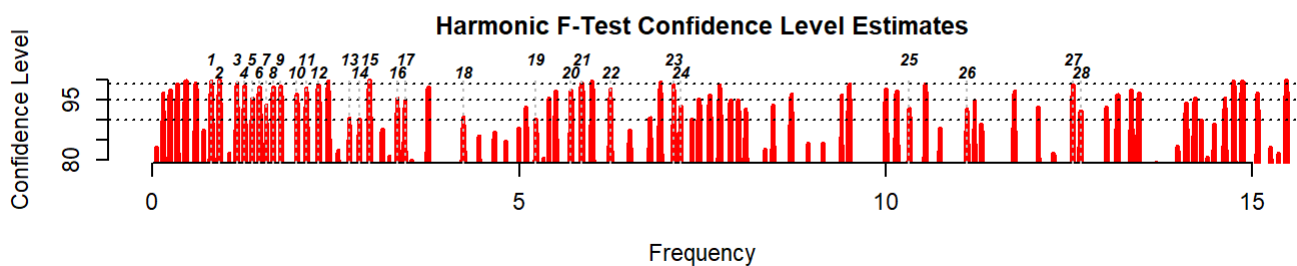

```
alb_Ti_MTM <- iso(dat=alb_Ti_MTM, xmin=0, xmax=15, genplot=F)
```

----- ISOLATE STRATIGRAPHIC DATA BY LOCATION -----

```
* Number of data points= 10079
* Number of columns= 8
* Minimum= 0.009920635 , Maximum= 99.99008
* Isolating data between 0 and 15
* Number of data points following culling= 1511
```

```
plot(alb_Ti_MTM$Frequency,
     alb_Ti_MTM$Power,
     type = 'l',
     xlab = "Frequency (cycles/m)",
     ylab = "Variance",
     )
```

```
lines(alb_Ti_MTM$Frequency,
      alb_Ti_MTM$AR1_fit,
      type = 'l',
      col = 'black',
      lwd = 2
      )
```

```
lines(alb_Ti_MTM$Frequency,
      alb_Ti_MTM$AR1_90_power,
      type = 'l',
      col = 'red',
      lwd = 2
      )
```

```
lines(alb_Ti_MTM$Frequency,
      alb_Ti_MTM$AR1_95_power,
      type = 'l',
      col = 'blue',
      lwd = 2
    )
```

```
lines(alb_Ti_MTM$Frequency,
      alb_Ti_MTM$AR1_99_power,
      type = 'l',
      col = 'green',
      lwd = 2
    )
```

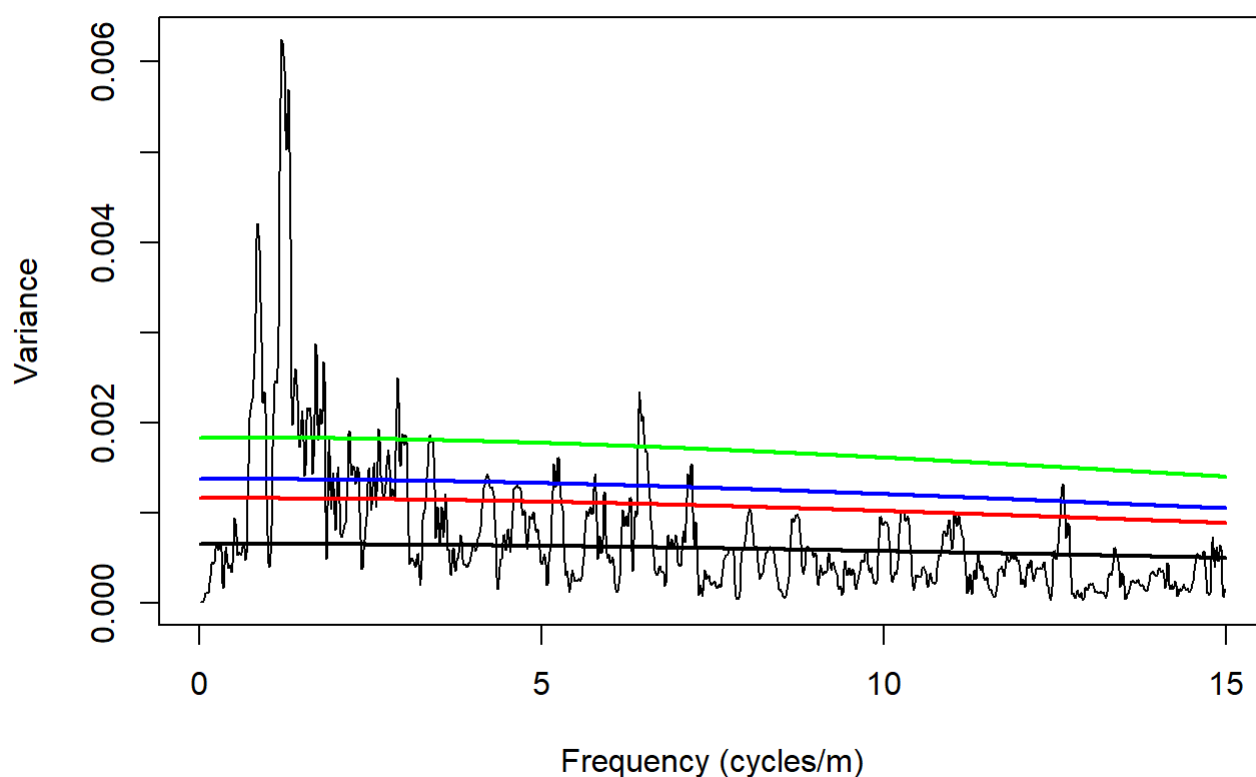

The 2 pi-MTM on the detrended data is performed to show the range of cyclicities in the detrended signal. Allowing to visually identify > 90 % CL periodicities.

## 2.3. Identification and extraction of the >90% CL periodicities

```
alb_Ti_MTM<-mtm(alb_Ti, xmax=15, siglevel = 0.9, ar1 = T, tbw= 2, output = 2)
```

```
----- PERFORMING Multitaper Spectral Analysis -----
* Number of data points in stratigraphic series: 4032
* Stratigraphic series length (space or time): 20.155
* Sampling interval (space or time): 0.005
* Will use default setting of 3 DPSS tapers
* Mean value subtracted= 4.069401e-05
* Linear trend NOT subtracted
```

\* Nyquist frequency: 100  
 \* Rayleigh frequency: 0.04960317  
 \* MTM Power spectrum bandwidth resolution (halfwidth): 0.09920635  
 \* Padded to 20160 points  
 \* Estimated AR1 coefficient = 0.4427859

\* Searching for significant spectral peaks that satisfy 90 % CL requirements outlined in Meyers (2012):

\* Number of significant F-test peaks identified = 94

ID / Frequency / Period / Harmonic\_CL / Rednoise\_CL

|    |           |            |          |          |
|----|-----------|------------|----------|----------|
| 1  | 0.7936508 | 1.26       | 99.6495  | 99.9071  |
| 2  | 0.9126984 | 1.095652   | 99.90678 | 99.90939 |
| 3  | 1.150794  | 0.8689655  | 99.05213 | 99.99092 |
| 4  | 1.25      | 0.8        | 98.30687 | 100      |
| 5  | 1.359127  | 0.7357664  | 95.50549 | 99.41661 |
| 6  | 1.458333  | 0.6857143  | 98.12654 | 98.55564 |
| 7  | 1.547619  | 0.6461538  | 93.79633 | 96.96442 |
| 8  | 1.646825  | 0.6072289  | 98.12533 | 97.42249 |
| 9  | 1.746032  | 0.5727273  | 98.30366 | 99.24096 |
| 10 | 1.964286  | 0.5090909  | 96.34805 | 93.20886 |
| 11 | 2.093254  | 0.4777251  | 97.98995 | 68.89833 |
| 12 | 2.261905  | 0.4421053  | 98.62524 | 96.54462 |
| 13 | 2.678571  | 0.3733333  | 90.55385 | 91.9462  |
| 14 | 2.81746   | 0.3549296  | 90.19723 | 92.8981  |
| 15 | 2.956349  | 0.338255   | 99.80865 | 98.932   |
| 16 | 3.333333  | 0.3        | 95.41094 | 97.09887 |
| 17 | 3.44246   | 0.2904899  | 94.96645 | 78.86869 |
| 18 | 4.236111  | 0.2360656  | 90.58225 | 95.06536 |
| 19 | 5.228175  | 0.1912713  | 90.09819 | 97.21911 |
| 20 | 5.704365  | 0.1753043  | 97.37723 | 87.29627 |
| 21 | 5.853175  | 0.1708475  | 99.11158 | 69.01658 |
| 22 | 6.240079  | 0.1602544  | 97.67422 | 84.33962 |
| 23 | 7.103175  | 0.1407821  | 98.72186 | 65.90099 |
| 24 | 7.202381  | 0.138843   | 93.3723  | 96.0572  |
| 25 | 10.31746  | 0.09692308 | 92.89927 | 86.07821 |
| 26 | 11.10119  | 0.09008043 | 92.65311 | 88.88133 |
| 27 | 12.5496   | 0.07968379 | 98.55134 | 70.54842 |
| 28 | 12.65873  | 0.07899687 | 92.1856  | 82.09713 |
| 29 | 17.09325  | 0.05850261 | 94.11179 | 68.76633 |
| 30 | 17.8373   | 0.05606229 | 90.02154 | 88.05182 |
| 31 | 25        | 0.04       | 97.34224 | 99.05331 |
| 32 | 28.75     | 0.03478261 | 99.3598  | 82.94557 |
| 33 | 36.37897  | 0.02748841 | 93.34558 | 67.44022 |
| 34 | 36.49802  | 0.02739875 | 96.30253 | 68.38105 |
| 35 | 43.29365  | 0.02309808 | 99.42679 | 86.71654 |
| 36 | 44.6627   | 0.02239005 | 91.43392 | 93.59203 |
| 37 | 50.90278  | 0.01964529 | 94.31732 | 88.98035 |
| 38 | 53.5119   | 0.01868743 | 95.83561 | 91.34791 |
| 39 | 54.4246   | 0.01837404 | 93.35017 | 99.19354 |
| 40 | 56.4881   | 0.01770285 | 97.75355 | 89.75403 |
| 41 | 57.39087  | 0.01742437 | 90.87208 | 57.797   |
| 42 | 57.60913  | 0.01735836 | 94.16682 | 73.16123 |
| 43 | 57.95635  | 0.01725436 | 98.8438  | 87.94543 |
| 44 | 58.11508  | 0.01720724 | 97.76266 | 96.49958 |
| 45 | 58.22421  | 0.01717499 | 96.77038 | 79.02898 |
| 46 | 59.31548  | 0.01685901 | 92.31666 | 83.12247 |
| 47 | 59.51389  | 0.0168028  | 92.95351 | 82.93598 |
| 48 | 60.66468  | 0.01648406 | 95.20807 | 97.90035 |

|    |          |            |          |          |
|----|----------|------------|----------|----------|
| 49 | 61.06151 | 0.01637693 | 97.25952 | 59.65102 |
| 50 | 61.21032 | 0.01633712 | 96.41152 | 70.29164 |
| 51 | 61.33929 | 0.01630277 | 99.90038 | 91.56283 |
| 52 | 61.43849 | 0.01627644 | 97.2732  | 92.98992 |
| 53 | 64.62302 | 0.01547436 | 92.18034 | 95.99514 |
| 54 | 65.87302 | 0.01518072 | 94.95728 | 60.97955 |
| 55 | 67.86706 | 0.01473469 | 91.5305  | 98.91116 |
| 56 | 67.98611 | 0.01470889 | 96.37001 | 91.48216 |
| 57 | 70.82341 | 0.01411962 | 92.50066 | 93.04393 |
| 58 | 71.00198 | 0.01408411 | 95.82738 | 79.77178 |
| 59 | 73.15476 | 0.01366965 | 92.5475  | 73.40234 |
| 60 | 74.89087 | 0.01335276 | 99.11115 | 94.81942 |
| 61 | 75.77381 | 0.01319717 | 98.99135 | 97.25962 |
| 62 | 77.07341 | 0.01297464 | 97.1098  | 73.18008 |
| 63 | 78.65079 | 0.01271443 | 93.09069 | 96.18004 |
| 64 | 79.89087 | 0.01251707 | 98.51331 | 88.16902 |
| 65 | 80.17857 | 0.01247216 | 96.89047 | 83.7865  |
| 66 | 80.60516 | 0.01240615 | 96.57814 | 85.30011 |
| 67 | 80.77381 | 0.01238025 | 94.01293 | 80.79683 |
| 68 | 81.875   | 0.01221374 | 94.37741 | 64.65222 |
| 69 | 81.99405 | 0.01219601 | 97.83026 | 62.50613 |
| 70 | 82.2123  | 0.01216363 | 99.64703 | 73.589   |
| 71 | 82.33135 | 0.01214604 | 91.42229 | 87.60278 |
| 72 | 82.61905 | 0.01210375 | 94.18218 | 99.46475 |
| 73 | 83.80952 | 0.01193182 | 92.76434 | 98.51632 |
| 74 | 84.59325 | 0.01182127 | 94.4466  | 96.81177 |
| 75 | 85.5754  | 0.0116856  | 96.13613 | 57.87317 |
| 76 | 86.8254  | 0.01151737 | 93.10284 | 98.94794 |
| 77 | 87.14286 | 0.01147541 | 94.39533 | 85.17613 |
| 78 | 87.29167 | 0.01145585 | 95.06977 | 72.27986 |
| 79 | 87.48016 | 0.01143116 | 93.37054 | 62.7484  |
| 80 | 88.10516 | 0.01135007 | 97.95976 | 99.80612 |
| 81 | 89.33532 | 0.01119378 | 91.8167  | 95.82547 |
| 82 | 91.25992 | 0.01095771 | 99.14693 | 81.4381  |
| 83 | 91.51786 | 0.01092683 | 99.20682 | 98.60804 |
| 84 | 91.72619 | 0.01090201 | 99.51717 | 94.34934 |
| 85 | 93.03571 | 0.01074856 | 99.57157 | 86.42848 |
| 86 | 93.64087 | 0.0106791  | 92.99197 | 96.78454 |
| 87 | 93.95833 | 0.01064302 | 94.83938 | 98.07256 |
| 88 | 94.09722 | 0.01062731 | 94.58366 | 95.04817 |
| 89 | 94.40476 | 0.01059269 | 90.77981 | 78.9516  |
| 90 | 95.13889 | 0.01051095 | 93.32958 | 94.27396 |
| 91 | 95.50595 | 0.01047055 | 90.64873 | 96.05761 |
| 92 | 97.66865 | 0.0102387  | 97.14153 | 71.41045 |
| 93 | 98.90873 | 0.01011033 | 90.6295  | 58.61966 |
| 94 | 99.00794 | 0.0101002  | 90.26207 | 79.29464 |

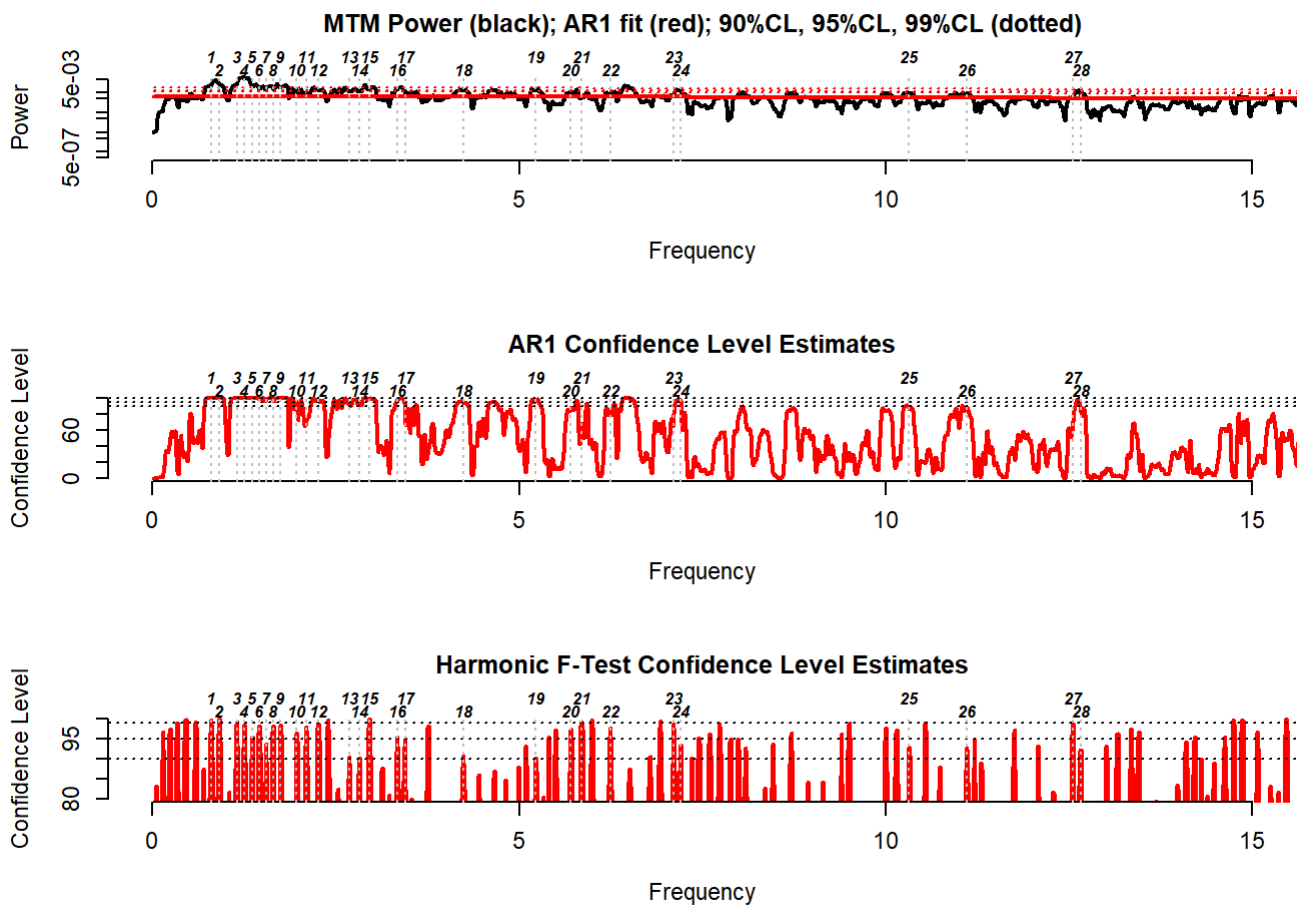

```
alb_Ti_MTM <- iso(dat=alb_Ti_MTM, xmin=0, xmax=15, genplot=F)
```

----- ISOLATE STRATIGRAPHIC DATA BY LOCATION -----

```
* Number of data points= 94
* Number of columns= 1
* Minimum= 0.7936508 , Maximum= 99.00794
* Isolating data between 0 and 15
* Number of data points following culling= 28
```

```
write.csv(alb_Ti_MTM,"alb_Ti_sigfreq_MTM_rsp0.005_det0.20_Zscore_ACL.csv")
```

## Step 3: Ratio of frequencies

### 3.1. Ratio of the significant frequencies extracted from the MTM (in Excel)

The comparison between the ratios of the observed >90% CL and the theoretical ratio of the Milankovitch cycles is conducted in a separate Excel file. See Supplementary Materials 6 for more details.

Based on Zhao et al (2022b) paper, the 405 kyr cycle should be recorded between 1.75 and 2.25 m but nothing is visible in the Ti data (but is observable within the other detrital elements). However, all the other frequency bands observed by Zhao et al (2022b), and corresponding to Milankovitch periodicities are identified in the Ti data.



In addition, a significant peak is located around 0.85 m where the 173-kyr long obliquity (Inclination metronome) should be identified and this explains why we focus our study on the 173 kyr metronome.

The duration of target cycles are recalculated from the literature (Laskar et al (2004); Laskar (2020); Wu et al (2024)).

---

## Step 4: EHA and CWT

### 4.1. Evolutive Harmonic Analysis (EHA)

---

```
eha(alb_Ti,
    tbw=2,
    fmin=0.01,
    fmax=15,
    step=0.005,
    win=6,
    demean=T,
    detrend=T,
    siglevel=0.90,
    sigID=F,
    ydir=1,
    output=0,
    pl=1,
    palette=1,
    centerZero=T,
    ncolors=100,
    genplot=4,
    verbose=T
)
```

```
----- PERFORMING EVOLUTIVE HARMONIC ANALYSIS -----
* Number of data points in stratigraphic series: 4032
* Stratigraphic series length (space or time): 20.155
* Sampling interval (space or time): 0.005
* Number of data points per window: 1201
* Moving window size (space or time): 6
* Window step points: 1
* Window step (space or time): 0.005
* Number of windows: 2832
* Mean value for each window will be subtracted
* Linear trend for each window will be subtracted
* Nyquist frequency: 100
* Rayleigh frequency: 0.1665279
* MTM Power spectrum bandwidth resolution (halfwidth): 0.3330558
* Will use 3 DPSS tapers
* Padded to 4096 points
```

The EHA is performed on the Ti detrended series and confirms the presence of recurrent periodicities along the ACL as suggested by the > 90 % CL frequencies observed in the MTM

## 4.2. WaverideR (non-detrended data)

---

### 4.2.1. Continuous Wavelet Transform (CWT)

```
alb_Ti_wt <- analyze_wavelet(alb_Ti_ndet, dj = 1/100,
                             lowerPeriod = 0.05,
                             upperPeriod = 25,
                             verbose = FALSE,
                             omega_nr = 10
                             )

plot_wavelet(wavelet = alb_Ti_wt,
             lowerPeriod = NULL,
             upperPeriod = NULL,
             n.levels = 100,
             palette_name = "rainbow",
             color_brewer = "grDevices",
             useRaster = TRUE,
             periodlab = "Period (metres)",
             x_lab = "Depth (metres)",
             keep_editable = FALSE,
             dev_new = F,
             add_lines = NULL,
             add_points = NULL,
             add_abline_h = NULL,
             add_abline_v = NULL,
             add_MTM_peaks = FALSE,
             add_data = TRUE,
             add_avg = TRUE,
             add_MTM = FALSE,
             demean_mtm = TRUE,
             detrend_mtm = TRUE,
             padfac_mtm = 5,
             tbw_mtm = 3,
             plot_horizontal = TRUE
             )
```

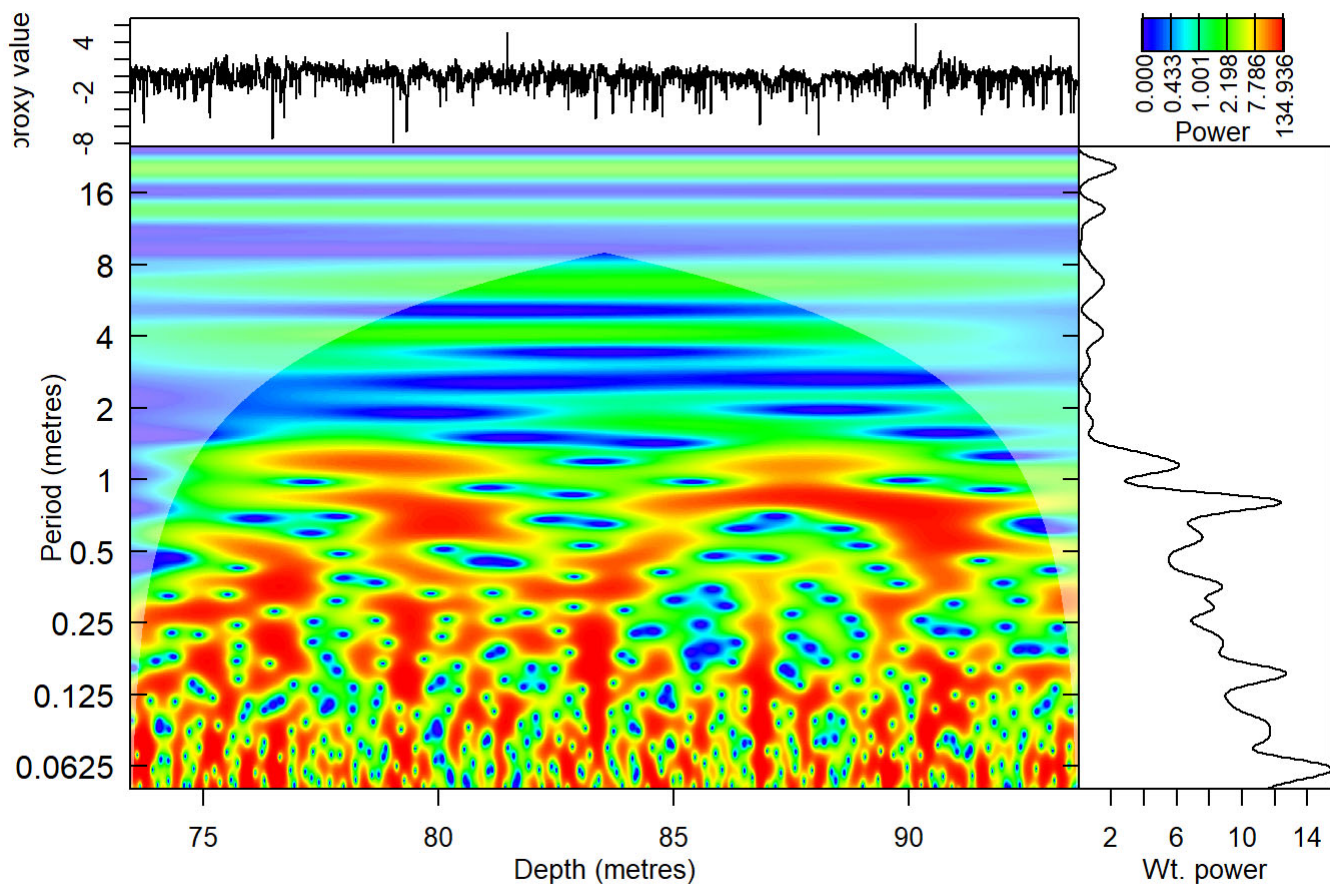

The Continuous Wavelet Transform (CWT) is performed on the Ti non-detrended series and exhibits similar results as the EHA analysis with a lot of power between 0.7-1m

#### 4.2.2. Tracking (in depth domain) of the 173 kyr cycle

The powerful 0.7-1m (supposed to correspond to the 173 kyr cycle) is tracked along the ACL

```
#Tracking the wavelet (remove the "#" in front of the 3 next command lines)
```

```
#alb_Ti_track <- track_period_wavelet(astro_cycle = 173,
#                                     wavelet = alb_Ti_wt,
#                                     n.levels = 100,
#                                     periodlab = "Period (metres)",
#                                     x_lab = "depth (metres)",
#                                     palette_name = "rainbow",
#                                     color_brewer = "grDevices",
#                                     plot_horizontal = TRUE
#                                     )
```

```
#alb_Ti_track_comp <- completed_series(wavelet = alb_Ti_wt,
#                                     tracked_curve = alb_Ti_track,
#                                     period_up = 1,
#                                     period_down = 0.75,
#                                     extrapolate = TRUE,
#                                     genplot = FALSE,
#                                     keep_editable = FALSE
#                                     )
```

```
#alb_Ti_track_comp <- loess_auto(alb_Ti_track_comp)
```

```
#write.csv(alb_Ti_track_comp,"alb_Ti_track.csv")
```

```

# Loading the tracked curve
alb_Ti_track_comp <- read.csv("alb_Ti_track.csv")
alb_Ti_track_comp <- alb_Ti_track_comp[,c(2,3)]

plot_wavelet(wavelet = alb_Ti_wt,
             lowerPeriod = NULL,
             upperPeriod = NULL,
             n.levels = 100,
             palette_name = "rainbow",
             color_brewer = "grDevices",
             useRaster = TRUE,
             periodlab = "Period (metres)",
             x_lab = "Depth (metres)",
             keep_editable = FALSE,
             dev_new = F,
             add_lines = cbind(alb_Ti_track_comp[,1],alb_Ti_track_comp[,2]),
             add_points = NULL,
             add_abline_h = NULL,
             add_abline_v = NULL,
             add_MTM_peaks = FALSE,
             add_data = TRUE,
             add_avg = TRUE,
             add_MTM = FALSE,
             demean_mtm = TRUE,
             detrend_mtm = TRUE,
             padfac_mtm = 5,
             tbw_mtm = 3,
             plot_horizontal = TRUE
            )

```

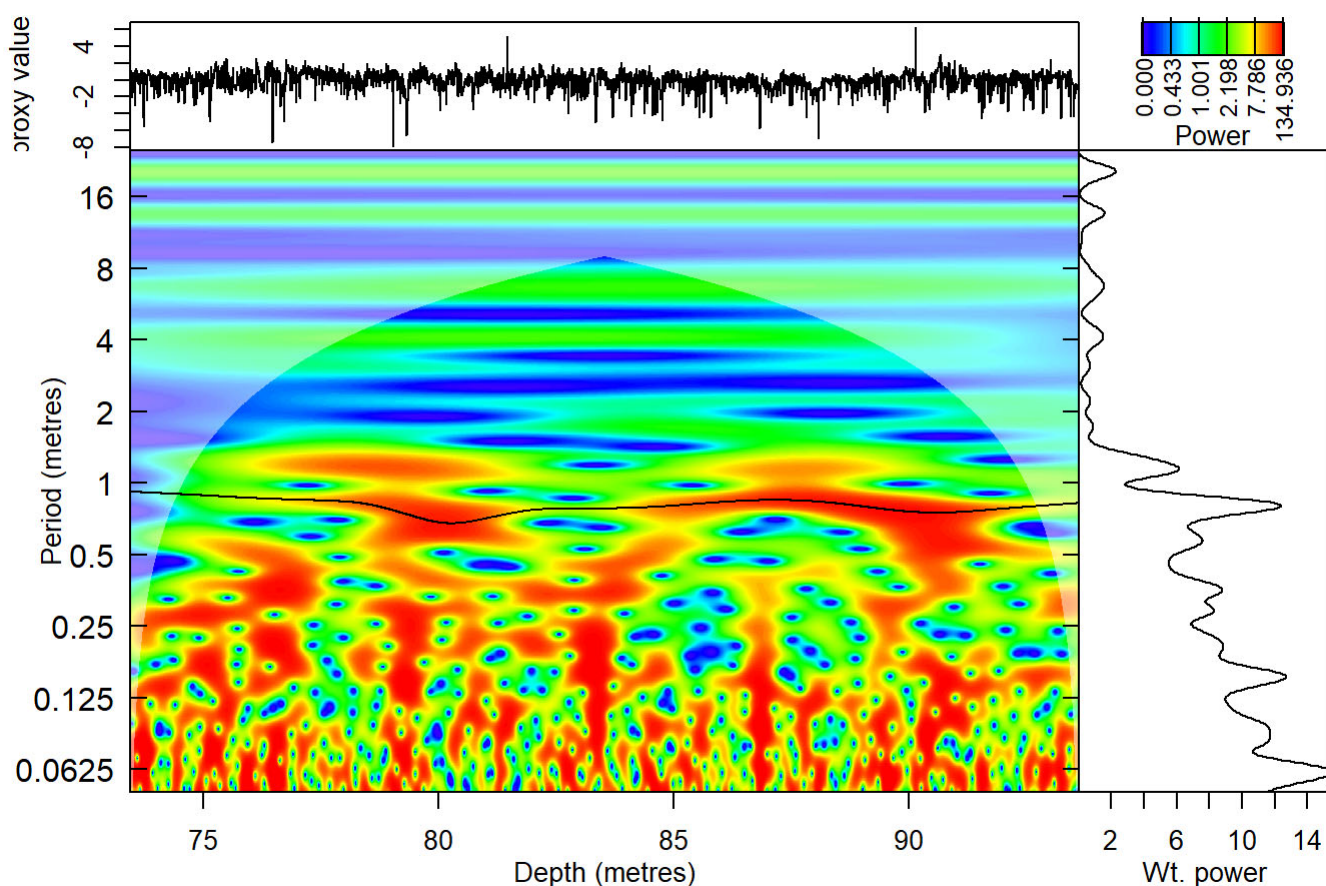

### 4.2.3. Depth to time domain conversion using the tracked cycle

```
alb_Ti_time <- curve2tune(data = alb_Ti_ndet,  
                          tracked_cycle_curve = alb_Ti_track_comp,  
                          tracked_cycle_period = 173,  
                          genplot = FALSE,  
                          keep_editable = FALSE  
                          )  
  
alb_Ti_time <- linterp(alb_Ti_time)
```

----- APPLYING PIECEWISE-LINEAR INTERPOLATION TO STRATIGRAPHIC SERIES -----

- \* Number of samples= 4032
- \* Determining median sampling interval for series
- \* Will interpolate to median sampling interval of 1.082284
- \* New number of samples= 4038

**Raw (black) and Interpolated (red) Data**

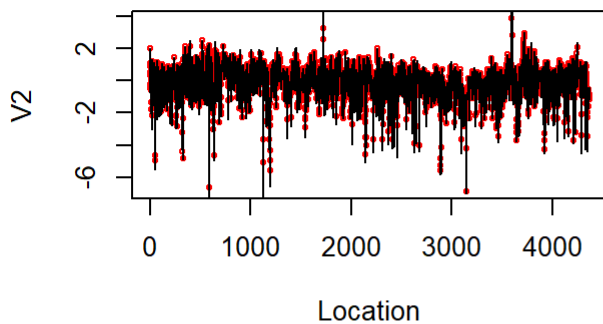

**Distribution of Interpolated Values**

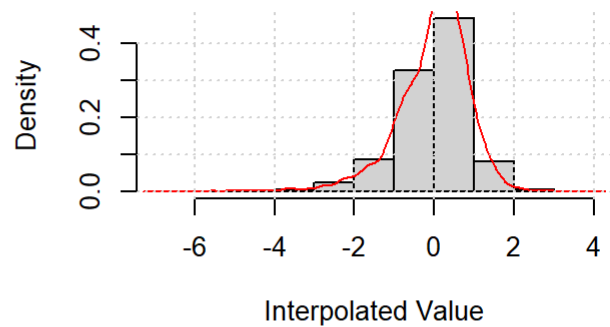

**Boxplot of Interpolated Values**

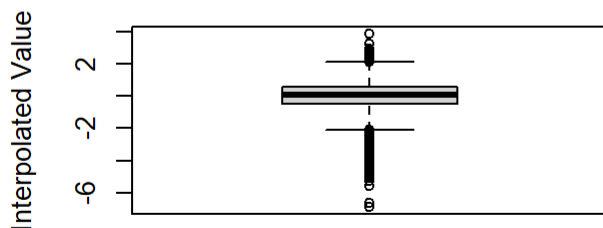

**Normal Q-Q Plot**

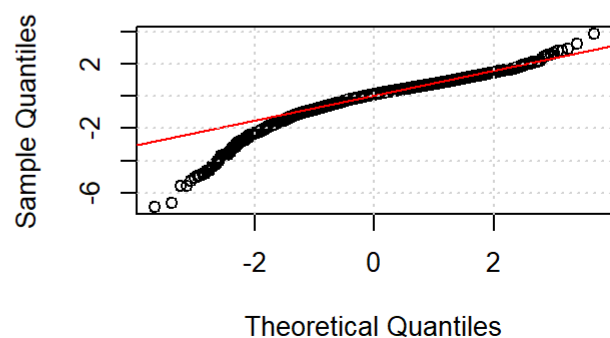

```
alb_Ti_time_wt <- analyze_wavelet(alb_Ti_time,  
                                  dj = 1/100,  
                                  lowerPeriod = 1,  
                                  upperPeriod = 3000,  
                                  verbose = FALSE,  
                                  omega_nr = 10  
                                  )  
  
plot_wavelet(wavelet = alb_Ti_time_wt,  
             lowerPeriod = NULL,  
             upperPeriod = NULL,
```



```

n.levels = 100,
palette_name = "rainbow",
color_brewer = "grDevices",
useRaster = TRUE,
periodlab = "Period (kyr)",
x_lab = "Time (kyr)",
keep_editable = FALSE,
dev_new = F,
add_lines = NULL,
add_points = NULL,
add_abline_h = c(20,32,100,110,125,173,405),
add_abline_v = NULL,
add_MTM_peaks = FALSE,
add_data = TRUE,
add_avg = TRUE,
add_MTM = FALSE,
demean_mtm = TRUE,
detrend_mtm = TRUE,
padfac_mtm = 5,
tbw_mtm = 3,
plot_horizontal = TRUE
)

```

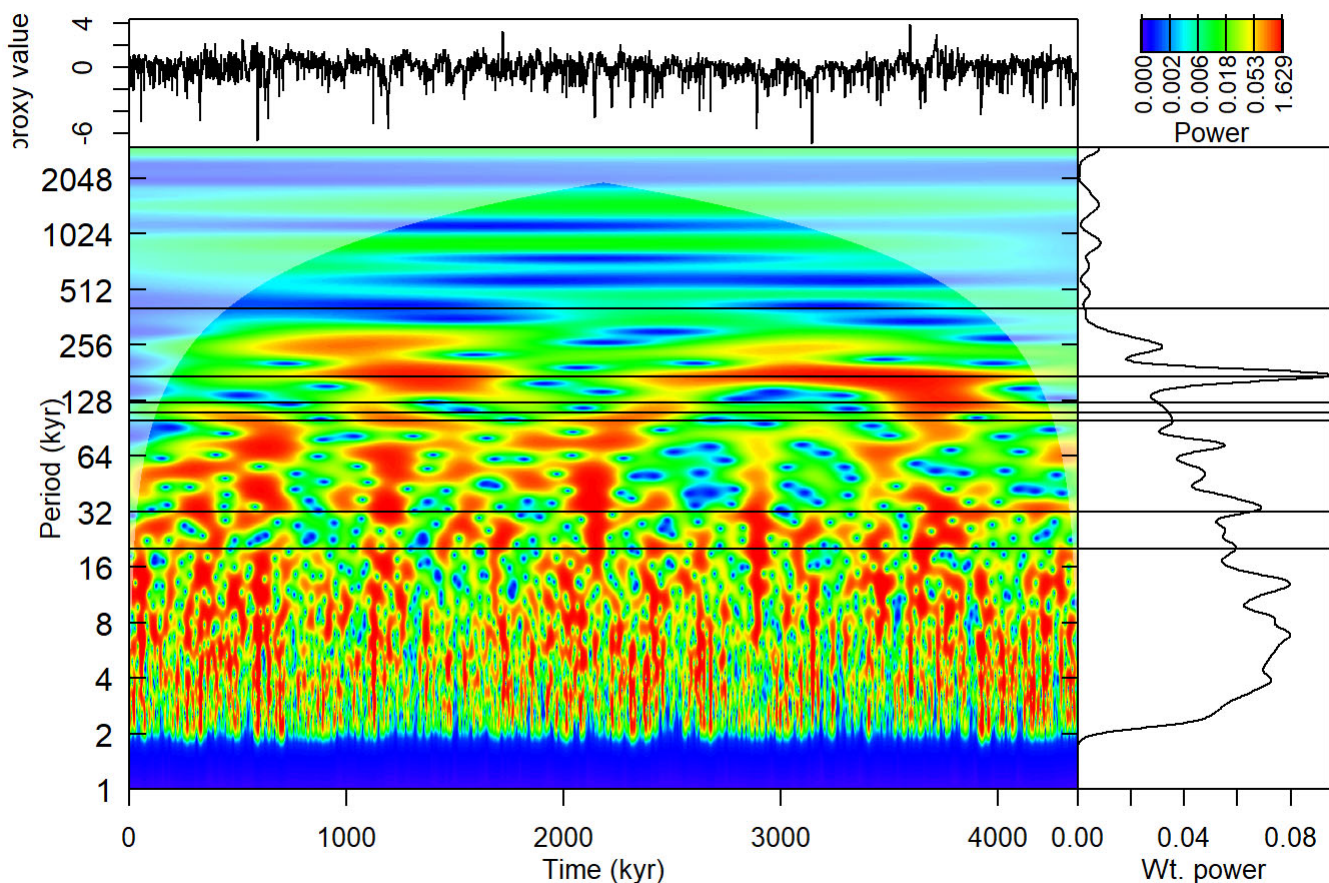

The CWT performed in time domain shows a lot of power and/or prominent peaks in the Milankovitch bands (precession: ~20 kyr, obliquity: ~32 kyr, short eccentricity: ~100-125 kyr and 173 kyr) in line with the expectations from the literature.

## Step 5: Average Spectral Misfit (ASM)

```
freq <- c(1.151,1.458,1.548,1.647,1.746,1.964,2.093,5.228,5.704,5.853,
        6.240,7.103,7.202,10.317,11.101,12.55,12.659)

target <- c(1/405,1/173,1/131.3,1/123.9,1/99.2,1/94.9,1/38.8,1/32.1,
          1/31.6,1/31.3,1/30.8, 1/24.4,1/20.2,1/19.8,1/19.3,1/16.8,1/16.7)

rayleigh <- 0.1

nyquist <- 15
```

```
asm(freq,
    target,
    fper=NULL,
    rayleigh,
    nyquist,
    sedmin=0.05,
    sedmax=5,
    numsed=500,
    linLog=1,
    iter=100000,
    output=F,
    genplot=T
)
```

----- PERFORMING AVERAGE SPECTRAL MISFIT ANALYSIS -----

\*\*\*\* WARNING: No uncertainty assigned to astronomical target frequencies.

```
* Analysis complete:
  Optimal Sedimentation Rate (cm/ka) at = 0.4931261
  Ho-SL (%) = 9.634
    or p-value = 0.09634
  ASM (cycles/ka) = 0.001008439
  Number of Astronomical Terms Fit = 17
```

The ASM analysis is performed confronting the > 90 % CL frequencies from the MTM analysis with the theoretical duration of Milankovitch cycles.

The ASM results in a sedimentation rate of 0.493 cm/ka, consistent with the 0.4-0.6 cm/kyr expectation for Blatica during the Cambrian.

## Step 6: Milankovitch bands filters in depth domain

```
#405 kyr cycle (1.75-2.25 m)
alb_Ti_405 <- taner(alb_Ti, xmax=5, fhigh=1/1.75, flow=1/2.25, demean = T)
```

----- TANER BANDPASS FILTERING STRATIGRAPHIC SERIES-----

```
* Number of data points= 4032
* Sample interval= 0.005
* Mean value removed= 4.069401e-05
```

**Stratigraphic Series**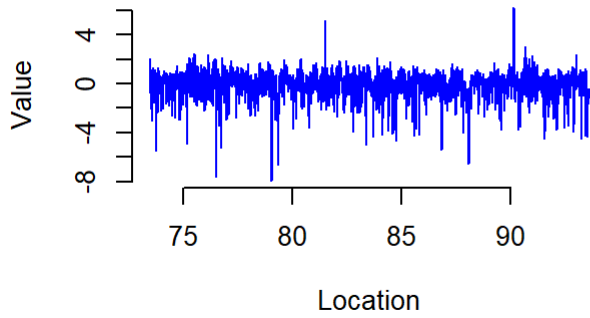**Amplitude**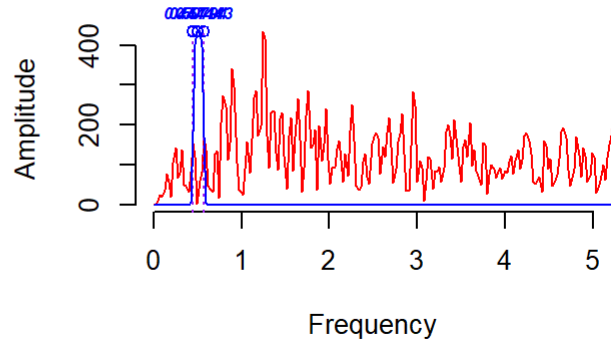**Bandpassed Signal**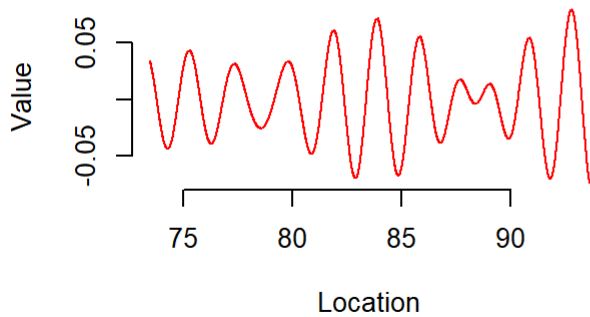**Comparison**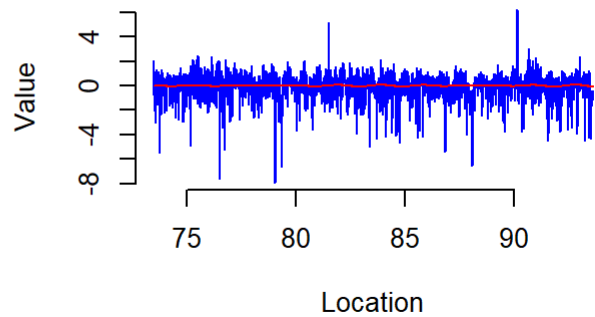

```
#173 kyr cycle (0.76-1 m)
alb_Ti_173 <- taner(alb_Ti,xmax=5, fhigh=1/0.76, flow=1, demean = T)
```

----- TANER BANDPASS FILTERING STRATIGRAPHIC SERIES-----

- \* Number of data points= 4032
- \* Sample interval= 0.005
- \* Mean value removed= 4.069401e-05



### Stratigraphic Series



### Amplitude

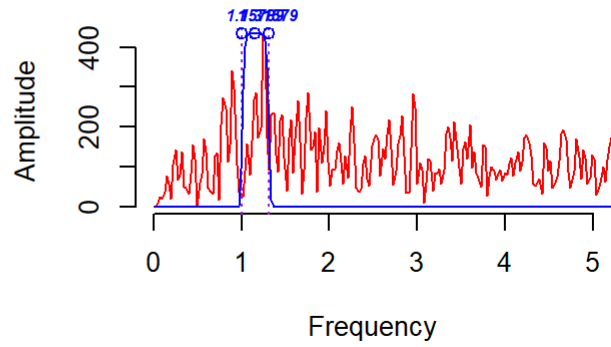

### Bandpassed Signal

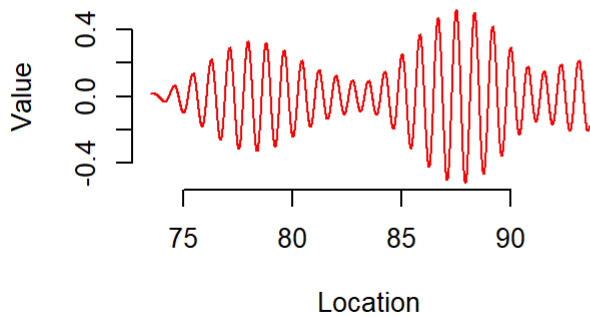

### Comparison

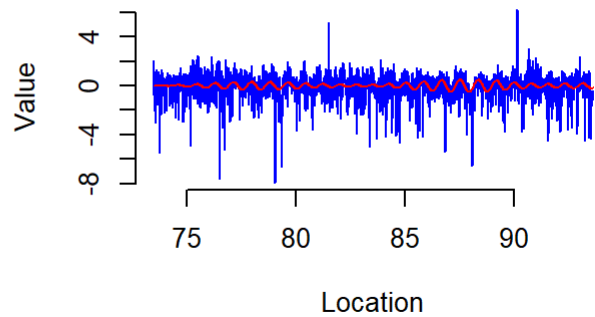

```
#short eccentricity band (0.42-0.72 m)
alb_Ti_100 <- taner(alb_Ti, xmax=5, fhigh=1/0.42, flow=1/0.72, demean = T)
```

----- TANER BANDPASS FILTERING STRATIGRAPHIC SERIES-----

- \* Number of data points= 4032
- \* Sample interval= 0.005
- \* Mean value removed= 4.069401e-05

### Stratigraphic Series

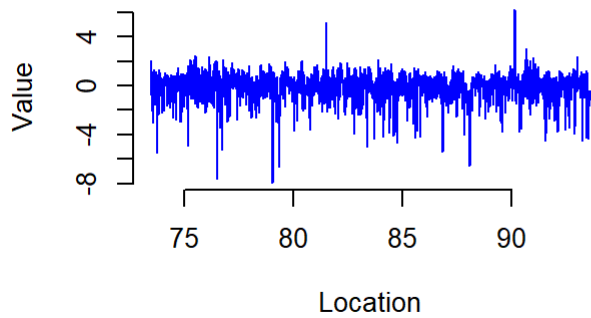

### Amplitude

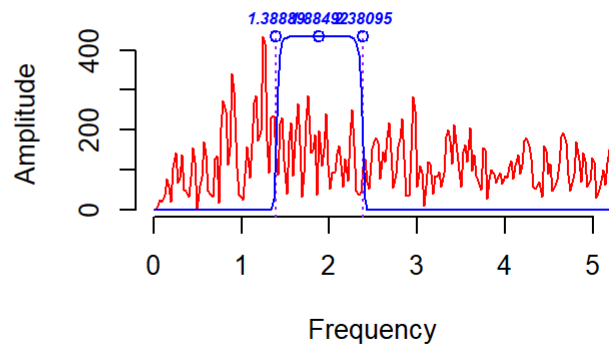

### Bandpassed Signal

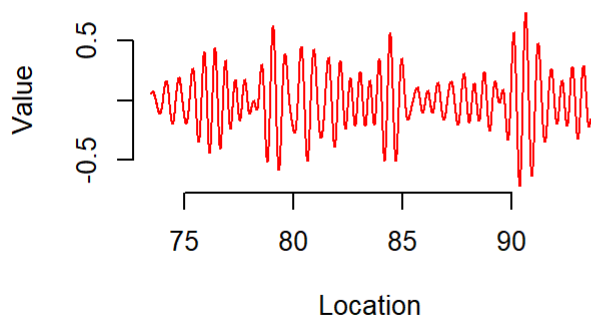

### Comparison

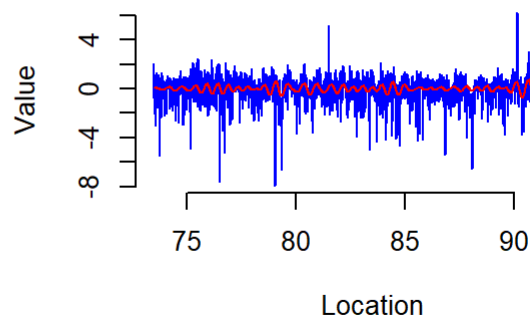

```
#obliquity band (0.12-0.2 m)
alb_Ti_31 <- taner(alb_Ti, xmax=10, fhigh=1/0.12, flow=1/0.2, demean=T)
```

----- TANER BANDPASS FILTERING STRATIGRAPHIC SERIES-----

- \* Number of data points= 4032
- \* Sample interval= 0.005
- \* Mean value removed= 4.069401e-05

### Stratigraphic Series



### Amplitude

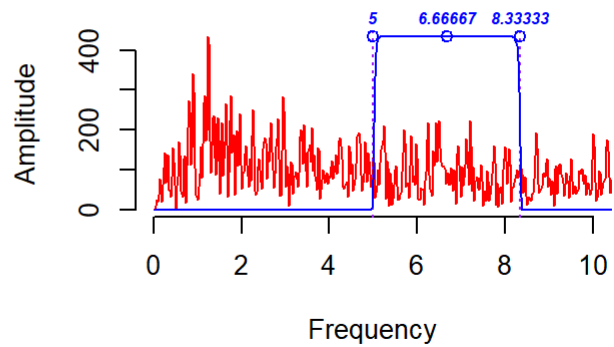

### Bandpassed Signal

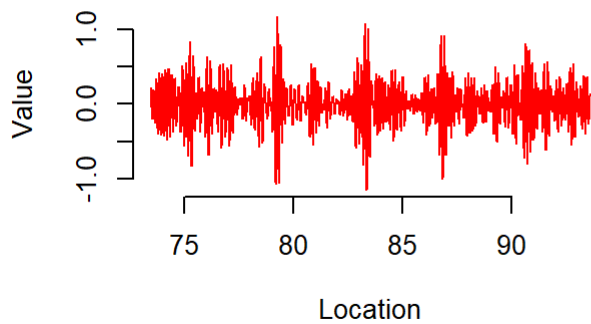

### Comparison

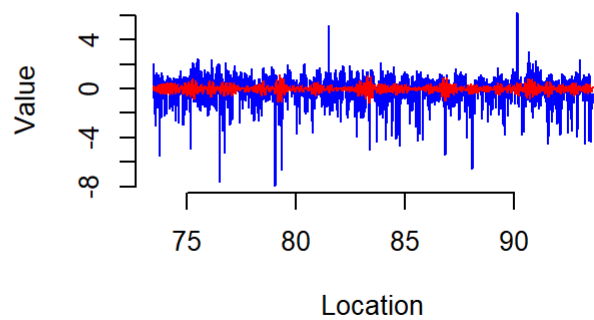

```
#precession band (0.08-0.1 m)
alb_Ti_20 <- taner(alb_Ti, xmax=15, fhigh=1/0.08, flow=1/0.1, demean=T)
```

----- TANER BANDPASS FILTERING STRATIGRAPHIC SERIES-----

- \* Number of data points= 4032
- \* Sample interval= 0.005
- \* Mean value removed= 4.069401e-05

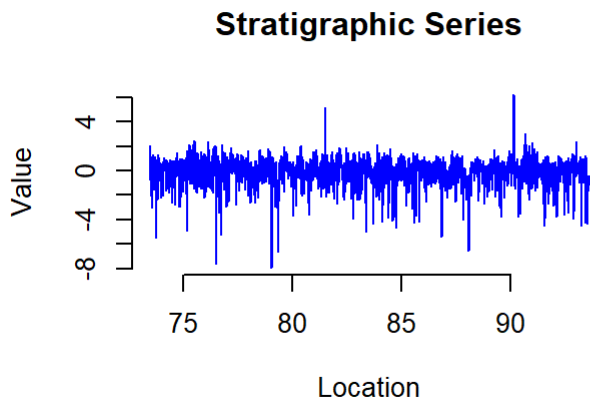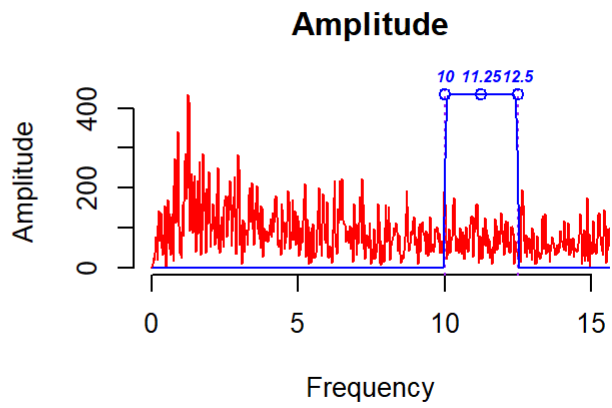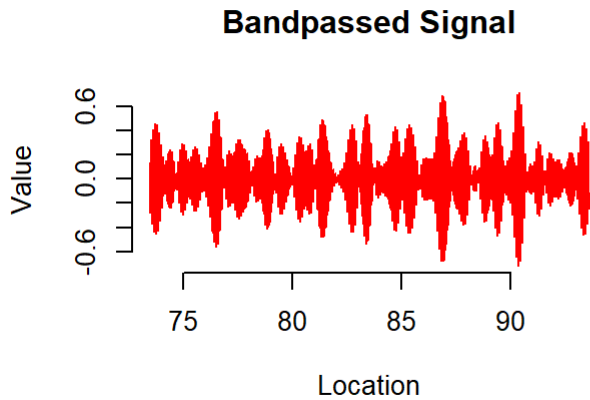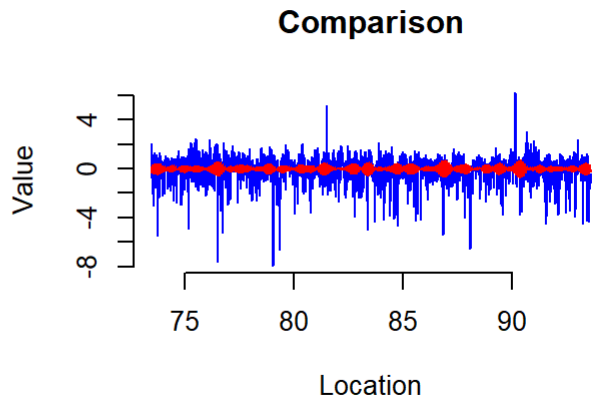

The filtering of the Milankovitch bands in depth domain allows to see the imprint of the astronomical cycles on the Ti sedimentary record.

## Step 7: Tuning of the Ti series

### 7.1. Filtering of the 0.76-0.97 m band

```
Ti_173R <- taner(alb_Ti, xmax=2, fhigh=1/0.97, flow=1/0.76, demean=T)
```

----- TANER BANDPASS FILTERING STRATIGRAPHIC SERIES-----

- \* Number of data points= 4032
- \* Sample interval= 0.005
- \* Mean value removed= 4.069401e-05

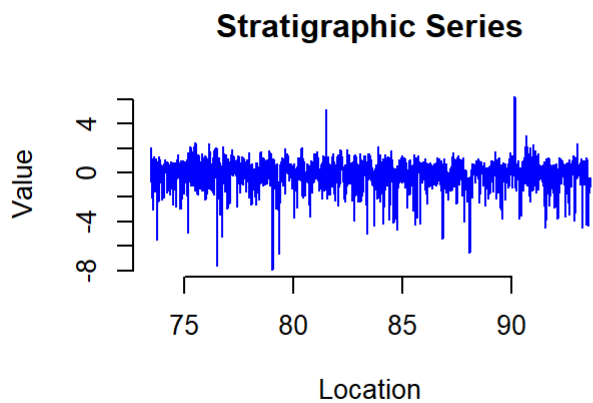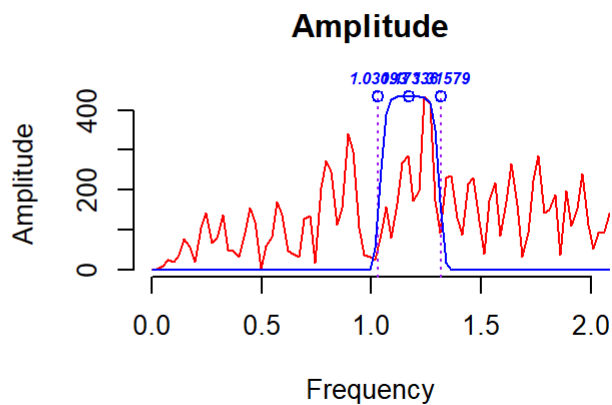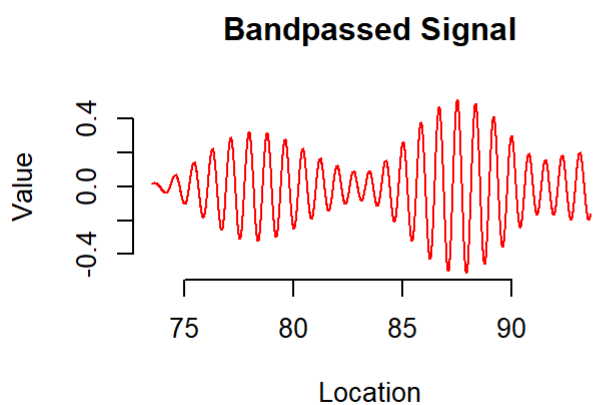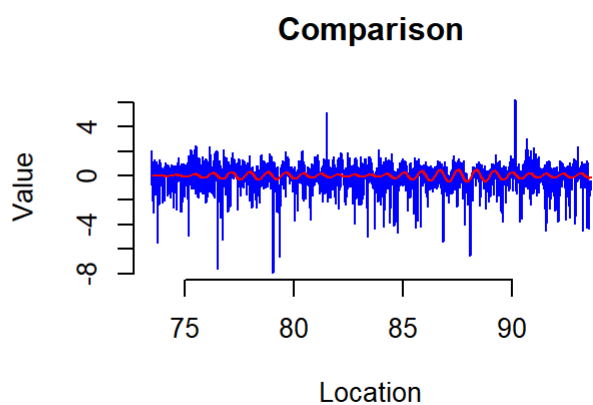

## 7.2. Identification of the trough of the filtered signal

```
Ti_173_min <- trough(Ti_173R, level = 200, genplot = T)
```

----- FINDING MINIMA OF TROUGHS, FILTERING AT THRESHOLD VALUE -----

```
* Number of data points= 4032
* Number of columns= 2
* Identifying minima of troughs
* Number of troughs identified= 25
* Filtering troughs at threshold of 200
* Number of troughs <= 200 : 25
```

## Data with Trough Minima Identified

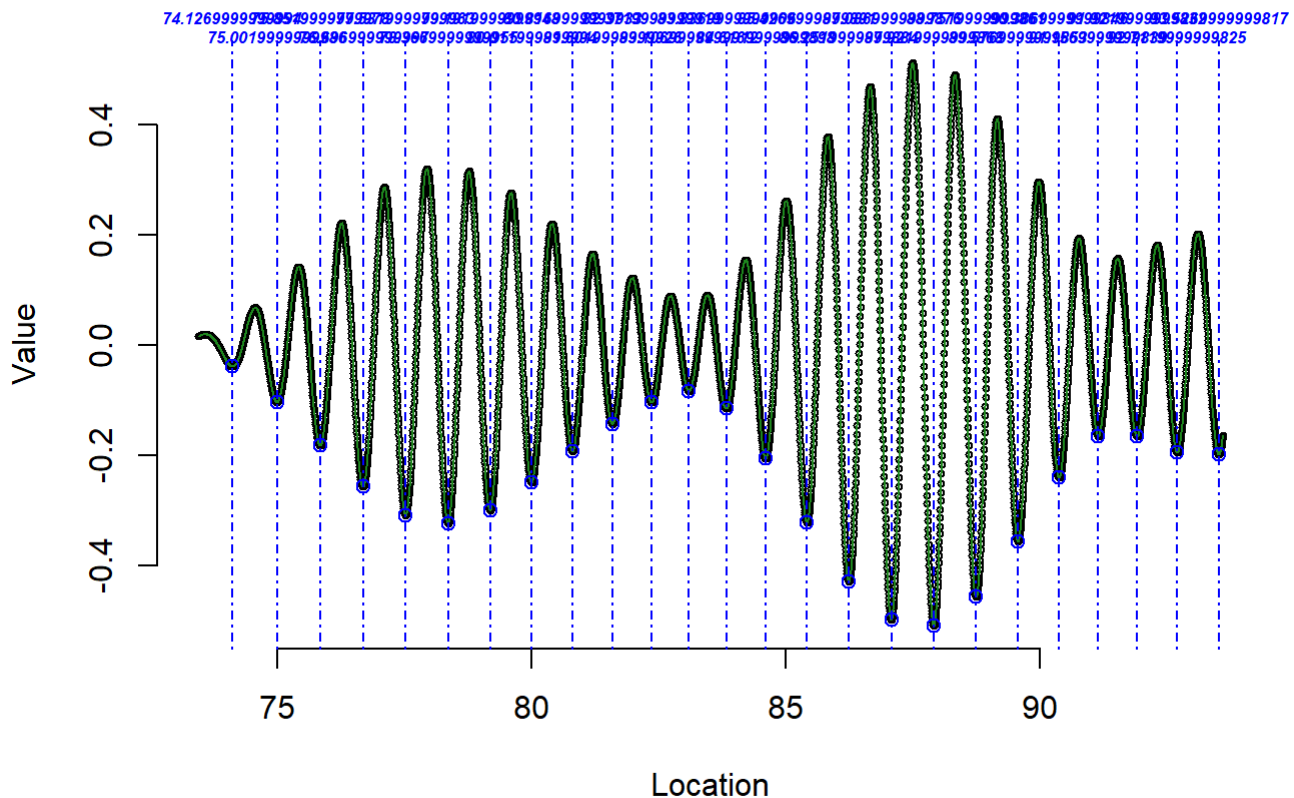

```
Ti_173_min <- Ti_173_min[,c(2,3)]

#write.csv(Ti_173_min,"Ti_173_rsp0.005_minTan_0.76-0.97m.csv")
```

### 7.3. Trough = multiple of 173 kyr cycle

Once the ".csv" file is created, go into it and for each location, add a multiple of 173 for the trough value as follows:

Location Trough\_Value

74.101; 173

74.961; 346

75.813; 519

76.661; 692

...; ...

93.543; 4325

### 7.4. Tuning of the 5mm spaced Ti detrended dataset

```
Ti_173_min <- read.csv("Ti_173_rsp0.005_minTan_0.76-0.97m.csv", sep=";")

Ti_173_tuned <- tune(alb_Ti, Ti_173_min, extrapolate=T, genplot=T, check=T, verbose=T)
```

----- TUNING STRATIGRAPHIC SERIES -----

- \* Number of data points= 4032
- \* Number of time control points= 25
- \* Sorting datasets into ensure increasing order, removing empty entries
- \* Mean sampling interval= 1.067338
- \* Median sampling interval= 1.054878
- \* Maximum sampling interval= 1.184932
- \* Minimum sampling interval= 0.9885714

## Data Series

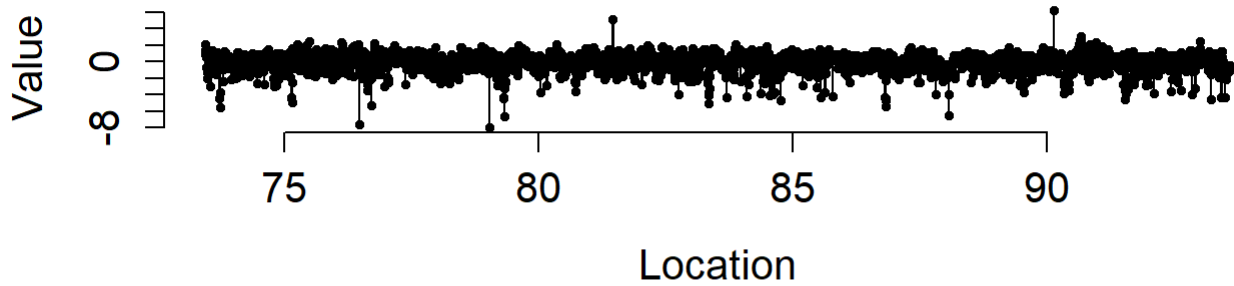

## Tuned Data Series

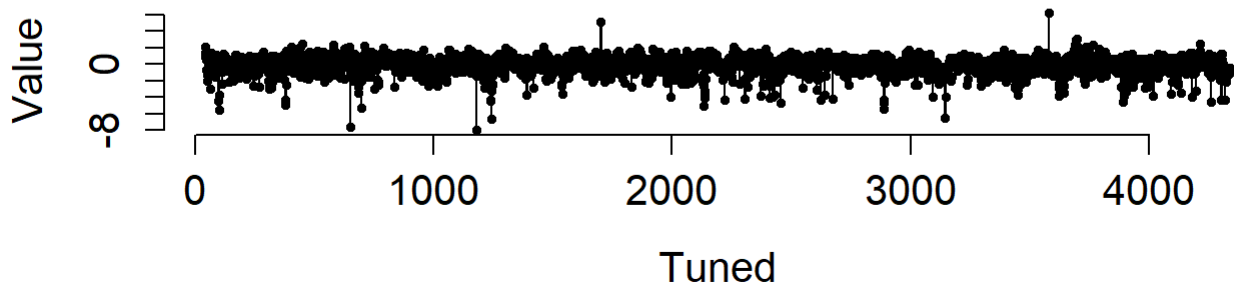

## 7.5. Evenly spaced dataset in time domain

Interpolation of the tuned dataset every 1.067338 kyr (mean sampling interval) to have an evenly space tune dataset

```
alb_Ti_time <- linterp(Ti_173_tuned, dt=1.067338, genplot=T)
```

----- APPLYING PIECEWISE-LINEAR INTERPOLATION TO STRATIGRAPHIC SERIES -----

- \* Number of samples= 4032
- \* New number of samples= 4031

Raw (black) and Interpolated (red) Data

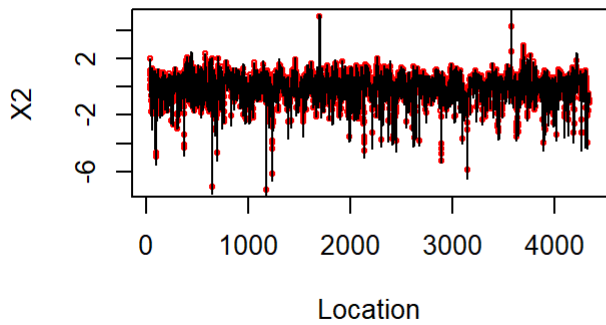

Distribution of Interpolated Values

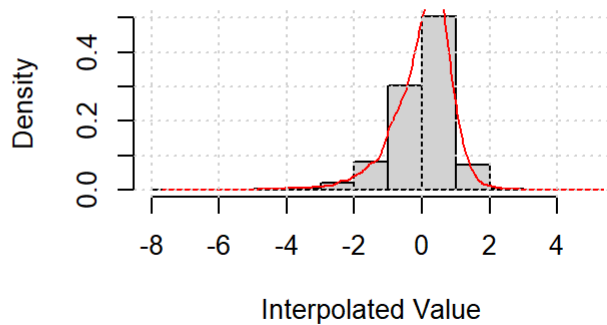

Boxplot of Interpolated Values

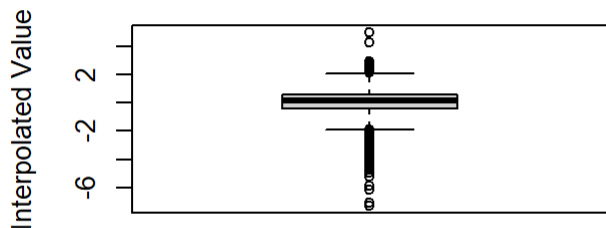

Normal Q-Q Plot

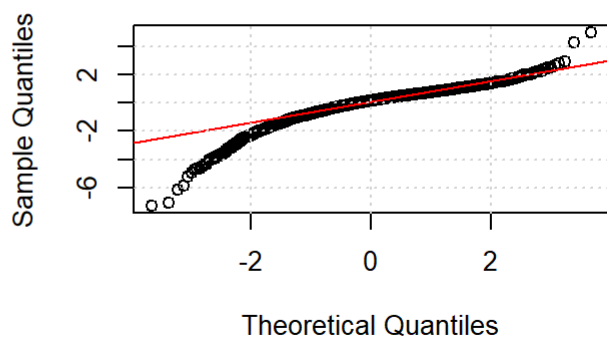

## Step 8: MTM and EHA in time domain

### 8.1. MTM in time domain

```
alb_Ti_time_MTM<-mtm(alb_Ti_time, xmax=0.07, siglevel = 0.9, ar1 = T, tbw= 2, output = 1)
```

----- PERFORMING Multitaper Spectral Analysis -----

- \* Number of data points in stratigraphic series: 4031
- \* Stratigraphic series length (space or time): 4301.372
- \* Sampling interval (space or time): 1.067338
- \* Will use default setting of 3 DPSS tapers
- \* Mean value subtracted= 0.0002517748
- \* Linear trend NOT subtracted
- \* Nyquist frequency: 0.4684552
- \* Rayleigh frequency: 0.0002324263
- \* MTM Power spectrum bandwidth resolution (halfwidth): 0.0004648526
- \* Padded to 20156 points
- \* Estimated AR1 coefficient = 0.6212844

- \* Searching for significant spectral peaks that satisfy 90 % CL requirements outlined in Meyers (2012):

- \* Number of significant F-test peaks identified = 92

| ID | Frequency   | Period   | Harmonic_CL | Rednoise_CL |
|----|-------------|----------|-------------|-------------|
| 1  | 0.003672153 | 272.3198 | 98.11969    | 94.30495    |
| 2  | 0.004183465 | 239.0363 | 99.9596     | 99.94852    |
| 3  | 0.005763886 | 173.4941 | 99.59287    | 100         |



|    |             |          |          |          |
|----|-------------|----------|----------|----------|
| 4  | 0.006693545 | 149.3977 | 99.93526 | 94.85659 |
| 5  | 0.007576721 | 131.9832 | 99.38519 | 98.51764 |
| 6  | 0.00850638  | 117.5588 | 97.05777 | 84.83089 |
| 7  | 0.009110658 | 109.7616 | 99.83016 | 88.81513 |
| 8  | 0.01148129  | 87.09824 | 91.49029 | 60.62901 |
| 9  | 0.01366599  | 73.17437 | 93.73957 | 69.35043 |
| 10 | 0.0158042   | 63.27431 | 96.79027 | 70.85455 |
| 11 | 0.02003415  | 49.91477 | 91.8715  | 99.14432 |
| 12 | 0.02500783  | 39.98748 | 92.75957 | 81.17411 |
| 13 | 0.02551914  | 39.18627 | 93.30452 | 82.46565 |
| 14 | 0.03091116  | 32.35077 | 94.76663 | 81.53078 |
| 15 | 0.03146896  | 31.77735 | 92.44902 | 89.46365 |
| 16 | 0.07888157  | 12.67723 | 98.24804 | 81.27618 |
| 17 | 0.08311151  | 12.03203 | 99.41217 | 93.76132 |
| 18 | 0.08520325  | 11.73664 | 99.78533 | 78.37017 |
| 19 | 0.0924081   | 10.82156 | 98.55063 | 97.42502 |
| 20 | 0.1046331   | 9.557203 | 99.35061 | 72.60485 |
| 21 | 0.1083518   | 9.2292   | 98.04082 | 59.37082 |
| 22 | 0.1189499   | 8.406903 | 93.34178 | 95.41128 |
| 23 | 0.1204373   | 8.303074 | 90.56264 | 88.05812 |
| 24 | 0.1385657   | 7.216795 | 98.05109 | 97.67991 |
| 25 | 0.1396348   | 7.16154  | 90.55456 | 86.19492 |
| 26 | 0.1450733   | 6.893068 | 92.72452 | 92.61329 |
| 27 | 0.1464678   | 6.82744  | 93.29638 | 82.1956  |
| 28 | 0.1504653   | 6.64605  | 94.22877 | 72.70561 |
| 29 | 0.1521852   | 6.570942 | 96.01006 | 87.28064 |
| 30 | 0.1688726   | 5.921625 | 94.73928 | 59.53296 |
| 31 | 0.1694304   | 5.90213  | 98.06945 | 75.66421 |
| 32 | 0.1751478   | 5.709465 | 99.53258 | 73.8443  |
| 33 | 0.1756126   | 5.694353 | 92.28933 | 86.49587 |
| 34 | 0.1777043   | 5.627325 | 95.84424 | 91.07312 |
| 35 | 0.1787734   | 5.593673 | 98.74848 | 96.1525  |
| 36 | 0.1841654   | 5.4299   | 95.13835 | 93.33122 |
| 37 | 0.1899758   | 5.263828 | 92.77685 | 94.60851 |
| 38 | 0.1930437   | 5.180175 | 98.45542 | 77.28544 |
| 39 | 0.1984357   | 5.039415 | 92.93684 | 76.75734 |
| 40 | 0.199133    | 5.02177  | 96.27157 | 79.9269  |
| 41 | 0.2035488   | 4.912826 | 97.12894 | 91.63699 |
| 42 | 0.2126595   | 4.702353 | 95.2339  | 97.48242 |
| 43 | 0.2133567   | 4.686986 | 99.82262 | 79.82971 |
| 44 | 0.2140075   | 4.672733 | 98.66001 | 95.50713 |
| 45 | 0.2169824   | 4.608669 | 99.91905 | 83.88459 |
| 46 | 0.218191    | 4.583141 | 98.57328 | 96.36083 |
| 47 | 0.2366447   | 4.225744 | 95.4402  | 83.09314 |
| 48 | 0.2404563   | 4.15876  | 97.94883 | 89.73545 |
| 49 | 0.2438496   | 4.100889 | 90.44932 | 89.0816  |
| 50 | 0.2458483   | 4.067549 | 98.96937 | 65.27153 |
| 51 | 0.2491021   | 4.014418 | 97.02854 | 88.59115 |
| 52 | 0.2545871   | 3.927929 | 97.9532  | 96.12543 |
| 53 | 0.2637443   | 3.791552 | 91.03357 | 83.59602 |
| 54 | 0.2665332   | 3.751877 | 95.18007 | 61.42055 |
| 55 | 0.2670445   | 3.744694 | 94.39814 | 81.11712 |
| 56 | 0.2676953   | 3.73559  | 98.92259 | 69.35863 |
| 57 | 0.2682066   | 3.728469 | 91.48261 | 90.09225 |
| 58 | 0.2702984   | 3.699616 | 94.62618 | 94.21628 |
| 59 | 0.2719717   | 3.676853 | 97.87828 | 82.45936 |
| 60 | 0.2763876   | 3.618107 | 99.5166  | 97.56497 |
| 61 | 0.2775032   | 3.603562 | 99.72265 | 80.50463 |

|    |           |          |          |          |
|----|-----------|----------|----------|----------|
| 62 | 0.2790371 | 3.583752 | 97.50418 | 83.856   |
| 63 | 0.2865209 | 3.490147 | 98.47766 | 87.8011  |
| 64 | 0.2881943 | 3.469881 | 90.22236 | 90.43317 |
| 65 | 0.2933539 | 3.408852 | 99.06799 | 84.75965 |
| 66 | 0.2948878 | 3.39112  | 90.61869 | 90.75301 |
| 67 | 0.295771  | 3.380994 | 99.87185 | 88.54789 |
| 68 | 0.29856   | 3.349411 | 96.87521 | 79.55894 |
| 69 | 0.301256  | 3.319436 | 93.67934 | 98.21133 |
| 70 | 0.3028829 | 3.301606 | 93.53422 | 82.58865 |
| 71 | 0.3036266 | 3.293519 | 95.67298 | 82.83303 |
| 72 | 0.3043239 | 3.285973 | 99.44436 | 97.6364  |
| 73 | 0.3049281 | 3.279461 | 96.0226  | 79.69787 |
| 74 | 0.3101807 | 3.223927 | 97.95119 | 96.23019 |
| 75 | 0.3262173 | 3.065441 | 97.45783 | 81.97655 |
| 76 | 0.3330503 | 3.002549 | 92.79158 | 99.85386 |
| 77 | 0.3377451 | 2.960813 | 99.22818 | 75.69901 |
| 78 | 0.3433231 | 2.912708 | 93.21386 | 89.50133 |
| 79 | 0.3459726 | 2.890402 | 94.27931 | 88.59534 |
| 80 | 0.3467628 | 2.883816 | 91.75708 | 77.67877 |
| 81 | 0.3510857 | 2.848307 | 98.04238 | 91.04519 |
| 82 | 0.3755357 | 2.662862 | 91.87629 | 57.88583 |
| 83 | 0.4113276 | 2.431152 | 99.71812 | 89.88467 |
| 84 | 0.4196481 | 2.382949 | 94.69839 | 85.34974 |
| 85 | 0.4240639 | 2.358135 | 98.08403 | 97.02254 |
| 86 | 0.4422853 | 2.260984 | 98.02701 | 77.99548 |
| 87 | 0.4428895 | 2.257899 | 96.66744 | 82.09898 |
| 88 | 0.4442375 | 2.251048 | 94.98735 | 77.30791 |
| 89 | 0.4534877 | 2.205132 | 92.15221 | 64.84901 |
| 90 | 0.453999  | 2.202648 | 95.81803 | 85.82515 |
| 91 | 0.460832  | 2.169988 | 91.3433  | 86.07989 |
| 92 | 0.4617151 | 2.165838 | 93.16843 | 87.15591 |

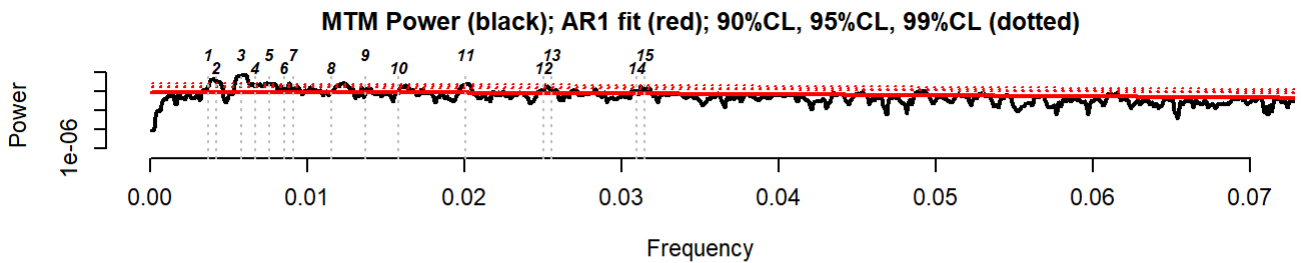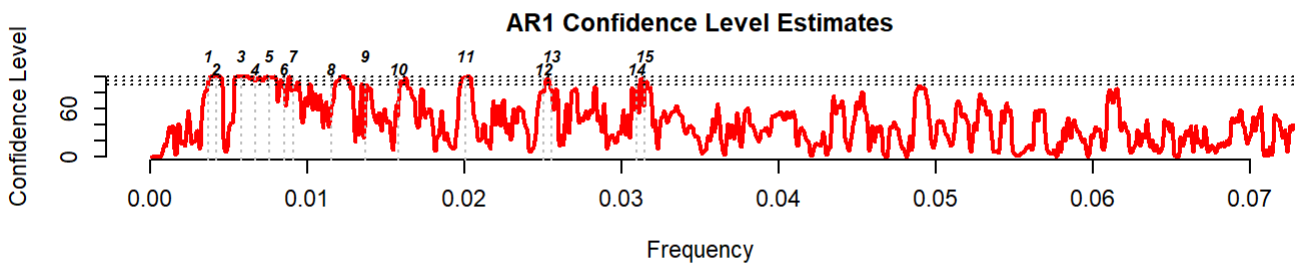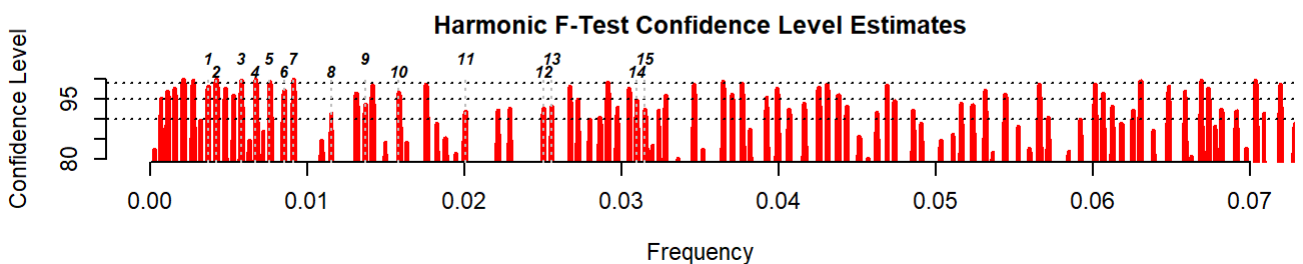

```
alb_Ti_time_MTM <- iso(dat=alb_Ti_time_MTM,xmin=0,xmax=0.07, genplot=F)
```

----- ISOLATE STRATIGRAPHIC DATA BY LOCATION -----

```
* Number of data points= 10077
* Number of columns= 8
* Minimum= 4.648295e-05 , Maximum= 0.4684087
* Isolating data between 0 and 0.07
* Number of data points following culling= 1505
```

```
plot(alb_Ti_time_MTM$Frequency,
     alb_Ti_time_MTM$Power,
     type = 'l',
     xlab = "Frequency (cycles/kyr)",
     ylab = "Variance"
)
```

```
lines(alb_Ti_time_MTM$Frequency,
      alb_Ti_time_MTM$AR1_fit,
      type = 'l',
      col = 'black',
      lwd = 2
)
```

```
lines(alb_Ti_time_MTM$Frequency,
      alb_Ti_time_MTM$AR1_90_power,
      type = 'l',
      col = 'red',
      lwd = 2
)
```

```
lines(alb_Ti_time_MTM$Frequency,
      alb_Ti_time_MTM$AR1_95_power,
      type = 'l',
      col = 'blue',
      lwd = 2
)
```

```
lines(alb_Ti_time_MTM$Frequency,
      alb_Ti_time_MTM$AR1_99_power,
      type = 'l',
      col = 'green',
      lwd = 2
)
```

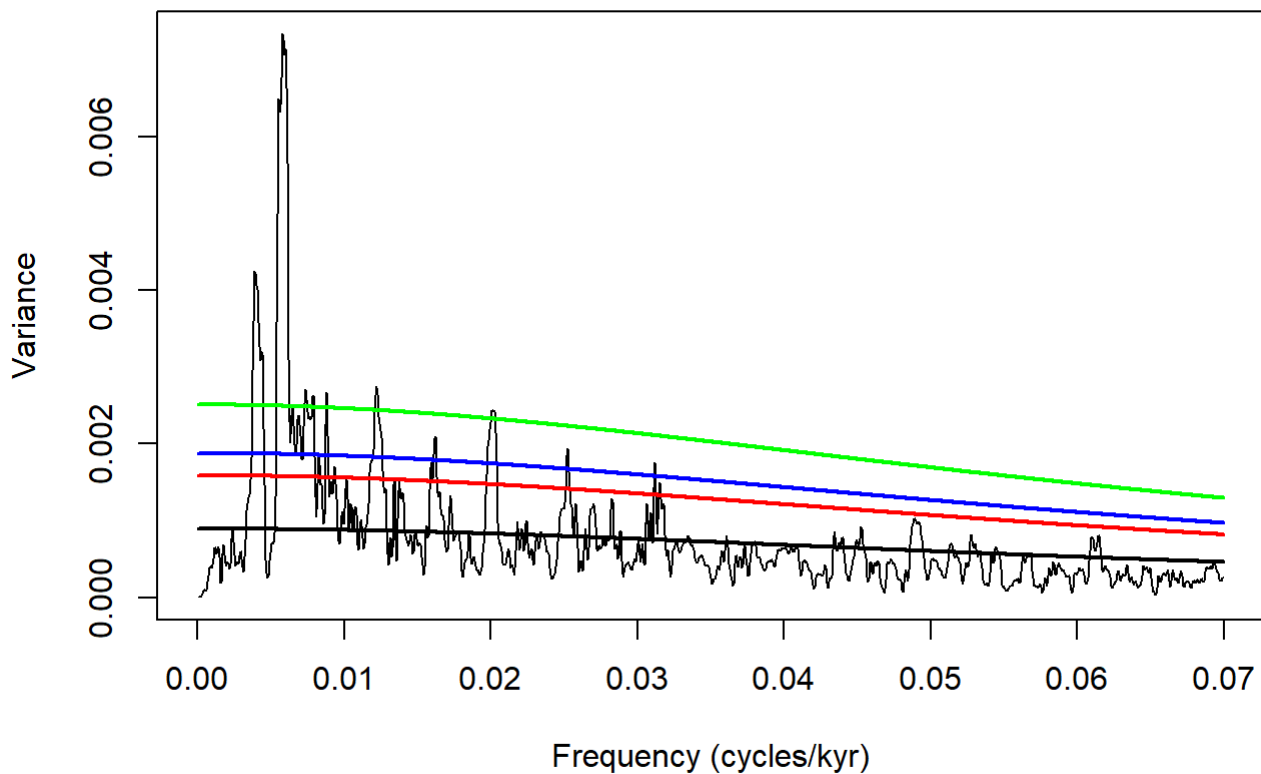

The 2 pi-MTM on the tuned dataset shows the range of cyclicities in the signal in time domain. Allowing to visually identify > 90 % CL periodicities.

## 8.2. EHA in time domain

```
alb_Ti_time_EHA<- eha(alb_Ti_time,
                      tbw=2,
                      fmin=0.001,
                      fmax=0.07,
                      step=1,
                      win=1100,
                      demean=T,
                      detrend=T,
                      siglevel=0.90,
                      sigID=F,
                      ydir=1,
                      output=1,
                      pl=1,
                      palette=1,
                      centerZero=T,
                      ncolors=200,
                      genplot=4,
                      verbose=T
                      )
```

----- PERFORMING EVOLUTIVE HARMONIC ANALYSIS -----

```
* Number of data points in stratigraphic series: 4031
* Stratigraphic series length (space or time): 4301.372
* Sampling interval (space or time): 1.067338
```

- \* Number of data points per window: 1031
- \* Moving window size (space or time): 1099.358
- \* Window step points: 1
- \* Window step (space or time): 1.067338
- \* Number of windows: 3001
- \* Mean value for each window will be subtracted
- \* Linear trend for each window will be subtracted
- \* Nyquist frequency: 0.4684552
- \* Rayleigh frequency: 0.0009087394
- \* MTM Power spectrum bandwidth resolution (halfwidth): 0.001817479
- \* Will use 3 DPSS tapers
- \* Padded to 4096 points

The EHA is performed on the Ti tuned series and confirms the presence of recurrent periodicities in the Milankovitch bands along the ACL as suggested by the > 90 % CL frequencies observed in the 2 pi-MTM

---

## Step 9: Hilbert transform analysis between obliquity and the 173 kyr cycle

```
#Filter out the obliquity cycle
alb_Ti_time_obl <- taner(alb_Ti_time, xmax=1/20, fhigh=1/27, flow=1/40)
```

----- TANER BANDPASS FILTERING STRATIGRAPHIC SERIES-----

- \* Number of data points= 4031
- \* Sample interval= 1.067338
- \* Mean value removed= 0.0002517748

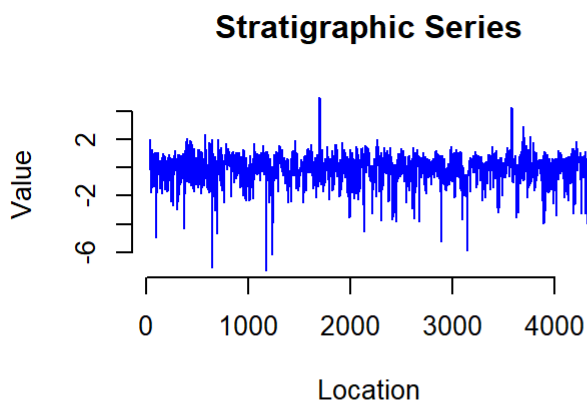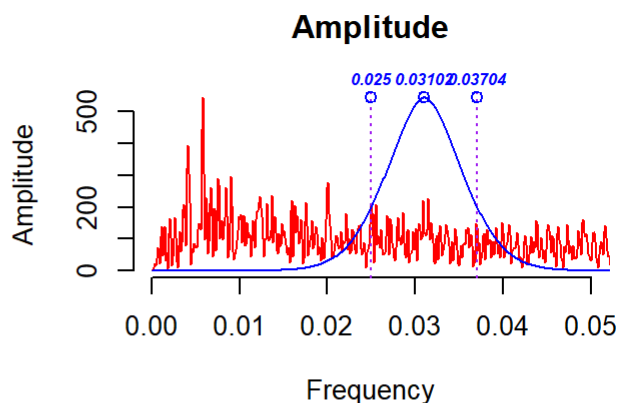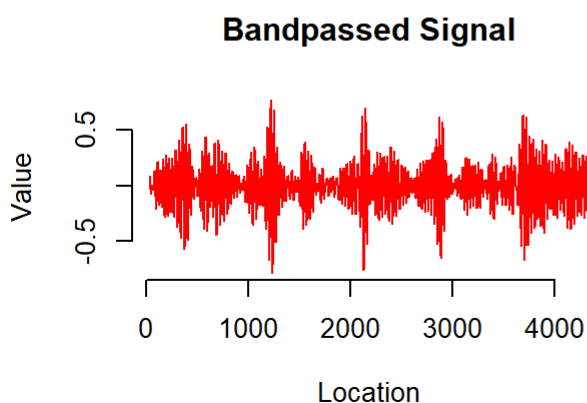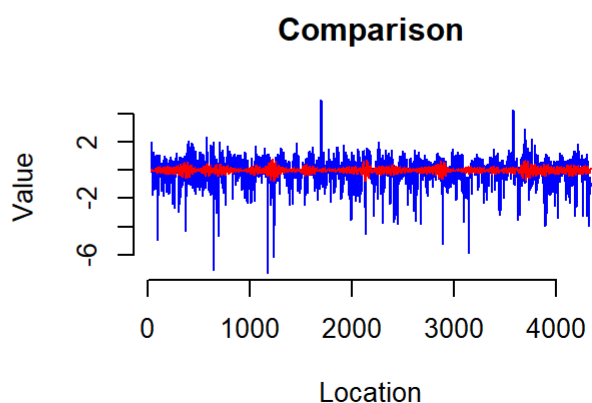

```
#Do the Hilbert transform to extract the amplitude
alb_Ti_time_obl_hilbert <- hilbert(alb_Ti_time_obl)
```

----- PERFORMING HILBERT TRANSFORM ON STRATIGRAPHIC SERIES -----

```
* Number of data points= 4031
* Sample interval= 1.067338
* Mean value removed= 0.0001213115
```

**Amplitude Spectrum for Data**

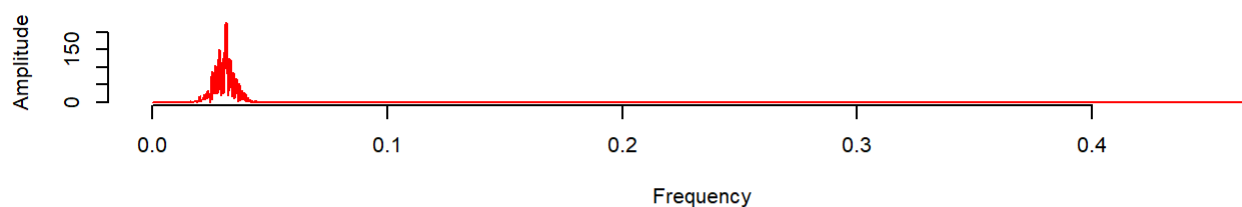

**Instantaneous Amplitude**

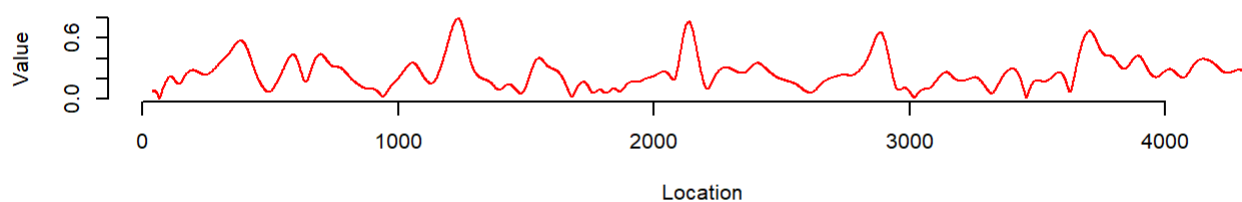

**Comparison**

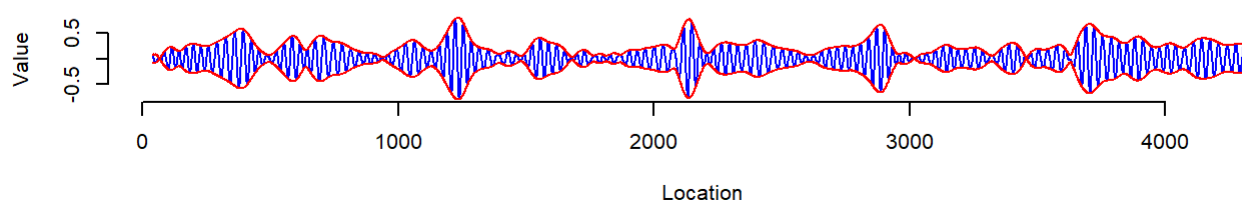

```
#Filter out the 173 kyr cycle from the amplitude modulation of the obliquity cycle
alb_Ti_time_obl_hilbert_173 <-taner(alb_Ti_time_obl_hilbert,
                                     xmax=1/100,
                                     fhigh=1/195,
                                     flow=1/155,
                                     detrend=TRUE
                                   )
```

----- TANER BANDPASS FILTERING STRATIGRAPHIC SERIES-----

```
* Number of data points= 4031
* Sample interval= 1.067338
* Mean value removed= 0.2578766
* Linear trend removed. m= 5.15436e-06 b= -0.01128923
```

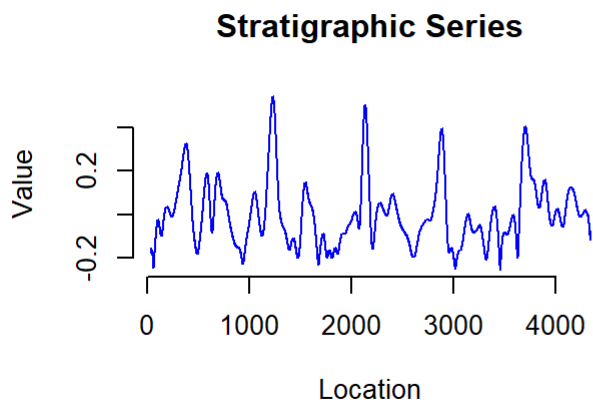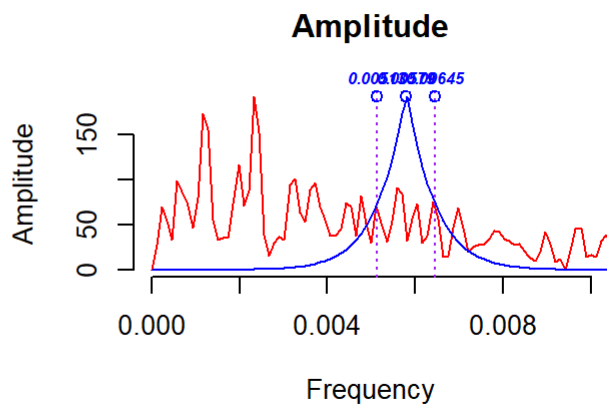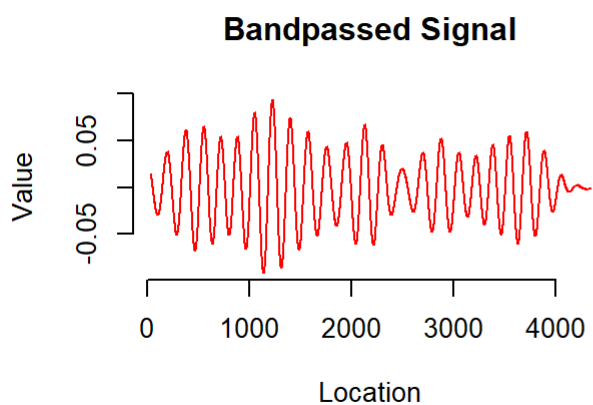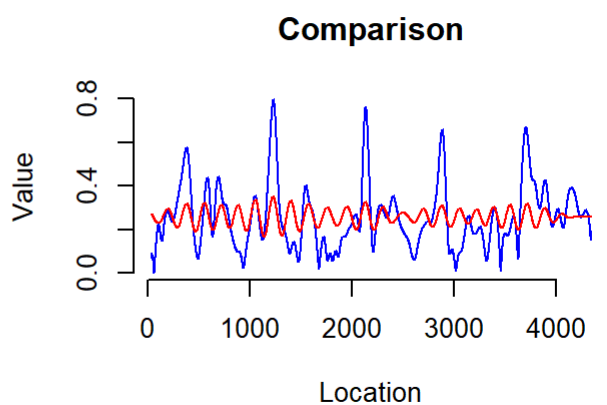

```
#Filter out the 173 kyr obliquity cycle directly from the proxy record
alb_Ti_time_173 <- taner(alb_Ti_time,
  xmax=1/50,
  fhigh=1/195,
  flow=1/155,
  demean=T
)
```

----- TANER BANDPASS FILTERING STRATIGRAPHIC SERIES-----

```
* Number of data points= 4031
* Sample interval= 1.067338
* Mean value removed= 0.0002517748
```

**Stratigraphic Series**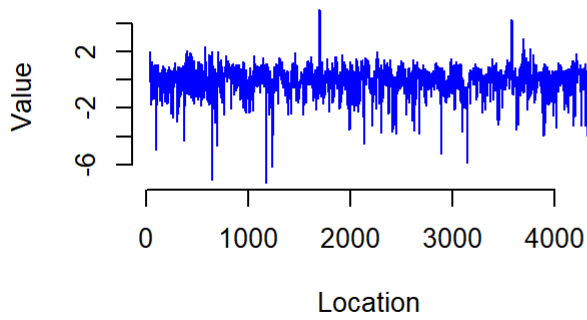**Amplitude**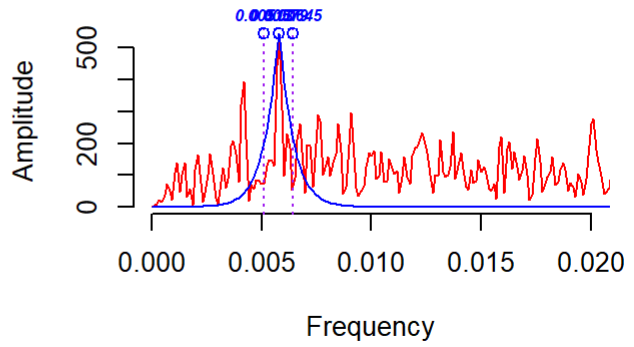**Bandpassed Signal**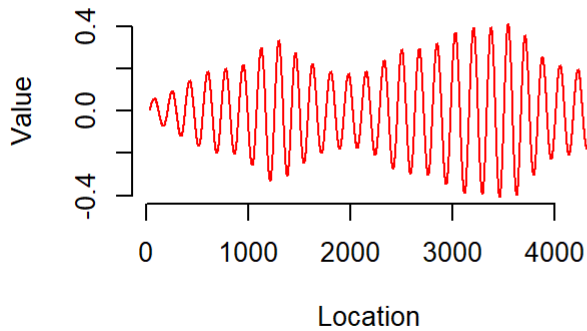**Comparison**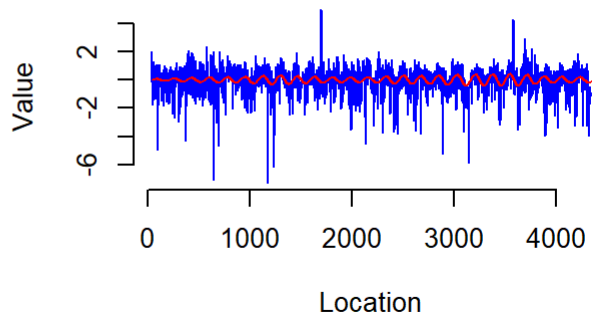

```
#Plot the 173 kyr obliquity cycle extracted from the amplitude modulation of the
#obliquity cycle vs the 173 kyr obliquity cycle directly extracted from the proxy
#record.
```

```
plot(alb_Ti_time_173[,1],
     alb_Ti_time_173[,2]-mean(alb_Ti_time_173[,2]),
     type="l",
     xlab = "Time (kyr)",
     ylab = "Power"
)

lines(alb_Ti_time_obl_hilbert_173[,1],
      alb_Ti_time_obl_hilbert_173[,2]-mean(alb_Ti_time_obl_hilbert_173[,2]),
      col="red",
      lwd=2
)
```



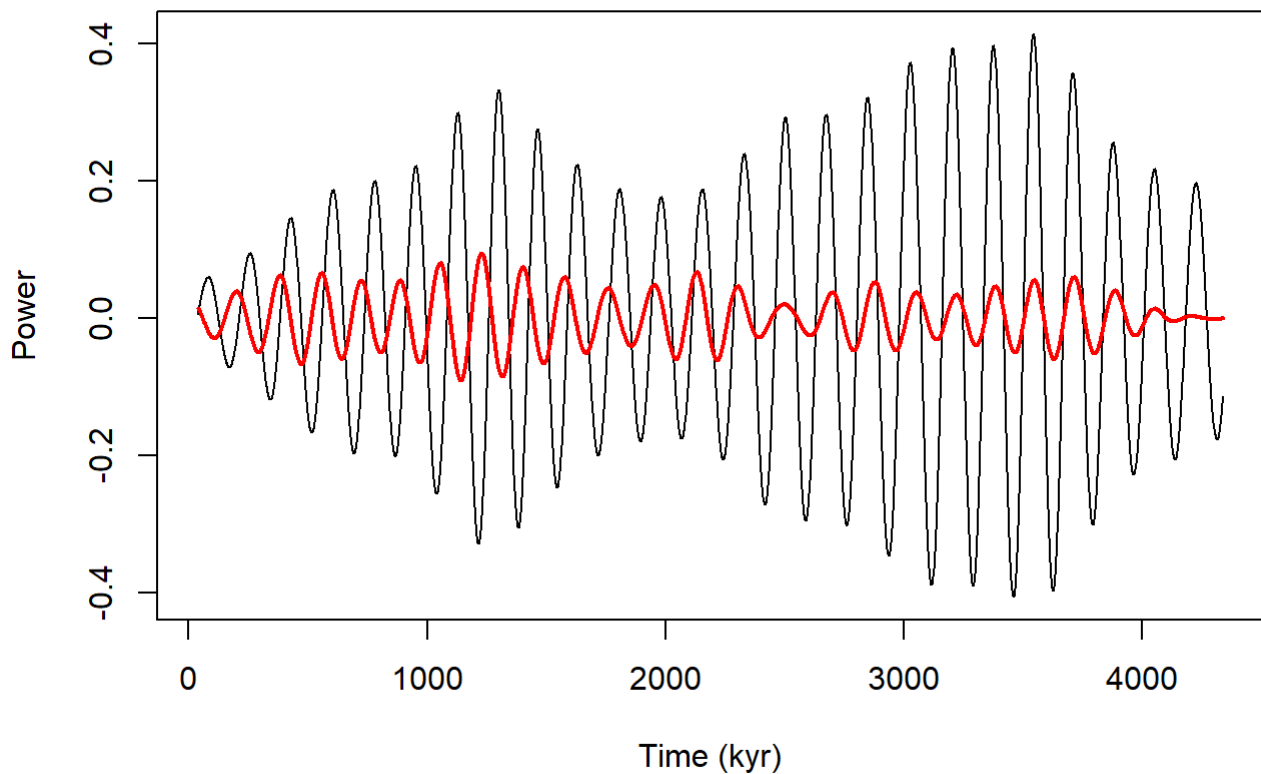

## Step 10: Hilbert transform analysis between the 173 kyr and the 1.2 Myr cycles

### 10.1. Tuning of the 1mm non-detrended Ti series

Same tuning procedure as for step 7 but on the non resampled and non detrended Ti dataset

```
#tuning of the non detrended 1mm Ti series
Ti_1mm_173R <- taner(alb_Ti_1mm, xmax=2, fhigh=1/0.97, flow=1/0.76, demean=T)
```

----- TANER BANDPASS FILTERING STRATIGRAPHIC SERIES-----

- \* Number of data points= 20158
- \* Sample interval= 0.001
- \* Mean value removed= -0.03216273

**Stratigraphic Series**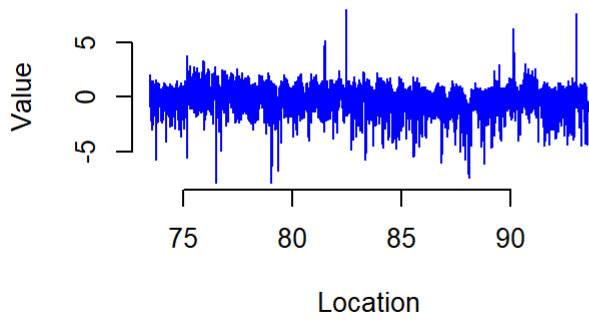**Amplitude**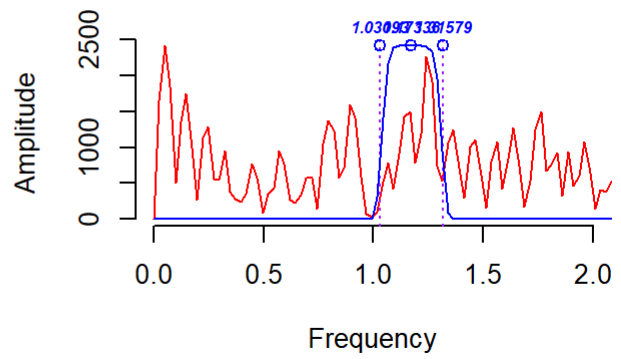**Bandpassed Signal**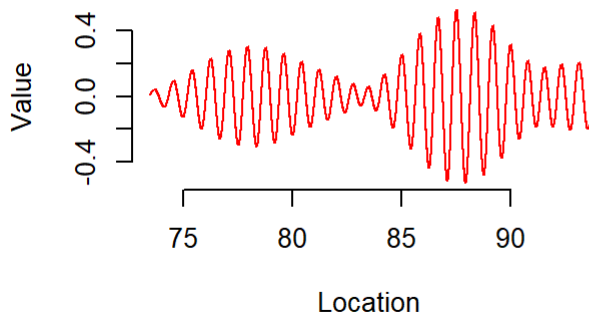**Comparison**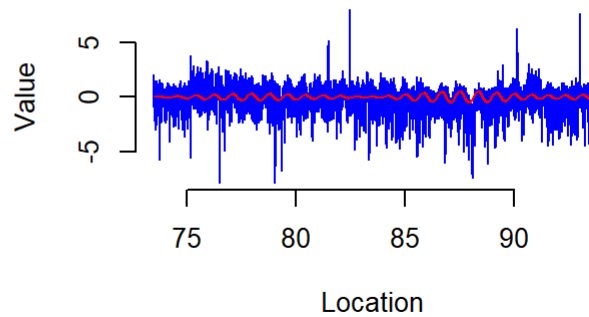

```
Ti_1mm_173_min <- trough(Ti_1mm_173R, level = 200, genplot = T)
```

----- FINDING MINIMA OF TROUGHS, FILTERING AT THRESHOLD VALUE -----

- \* Number of data points= 20158
- \* Number of columns= 2
- \* Identifying minima of troughs
- \* Number of troughs identified= 25
- \* Filtering troughs at threshold of 200
- \* Number of troughs <= 200 : 25

## Data with Trough Minima Identified

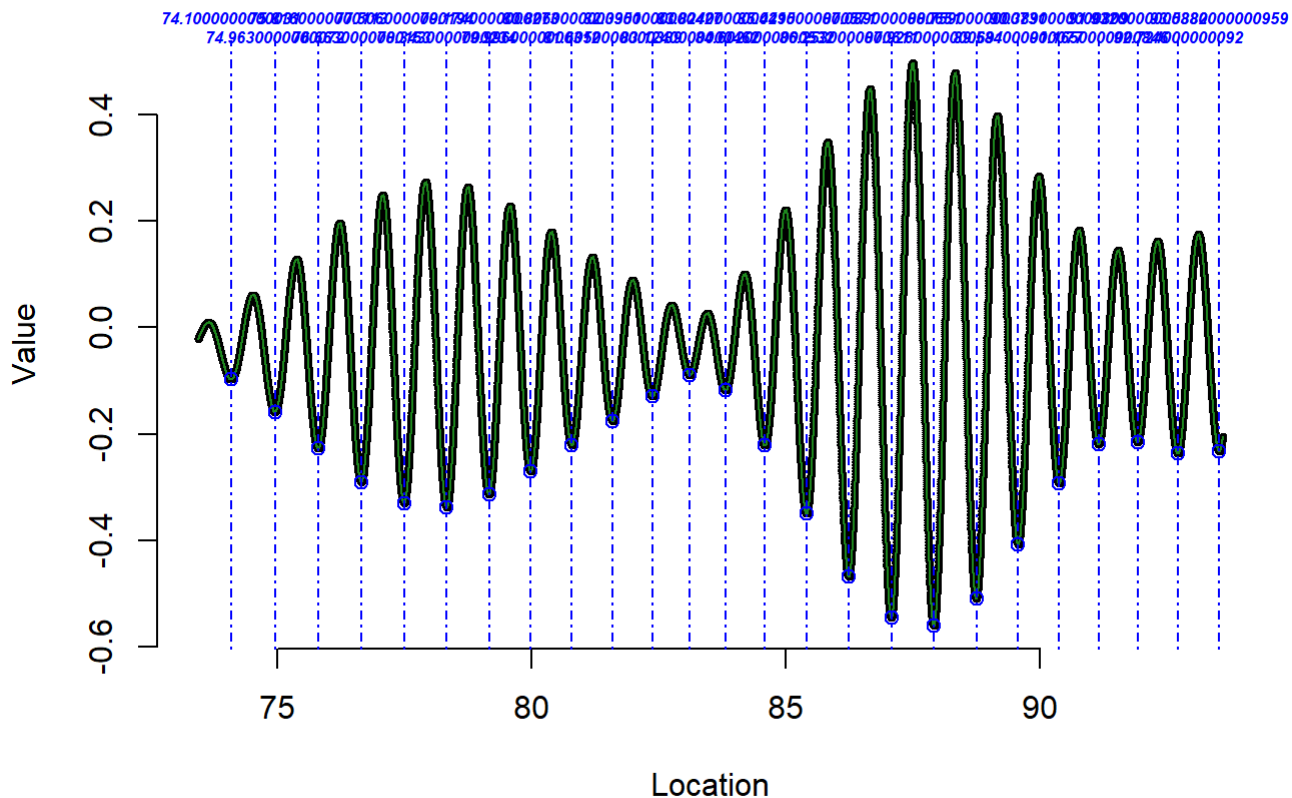

```
Ti_1mm_173_min <- Ti_1mm_173_min[,c(2,3)]

#write.csv(Ti_1mm_173_min,"Ti_1mm_173_minTan_0.76-0.97m.csv")

#Before continuing, go to the .csv file and for each location, add a multiple of
#173 for the trough value as explain in step 7.3.

Ti_1mm_173_min <- read.csv("Ti_1mm_173_minTan_0.76-0.97m.csv", sep=";")

Ti_1mm_173_tuned <- tune(alb_Ti_1mm,
                        Ti_1mm_173_min,
                        extrapolate=T,
                        genplot=T,
                        check=T,
                        verbose=T
                        )
```

----- TUNING STRATIGRAPHIC SERIES -----

- \* Number of data points= 20158
- \* Number of time control points= 25
- \* Sorting datasets into ensure increasing order, removing empty entries
  
- \* Mean sampling interval= 0.2131761
- \* Median sampling interval= 0.2104623
- \* Maximum sampling interval= 0.2471429
- \* Minimum sampling interval= 0.2004635

## Data Series

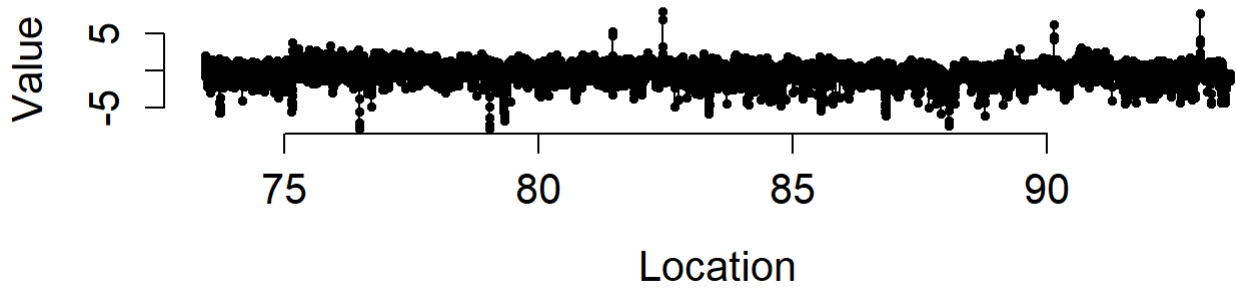

## Tuned Data Series

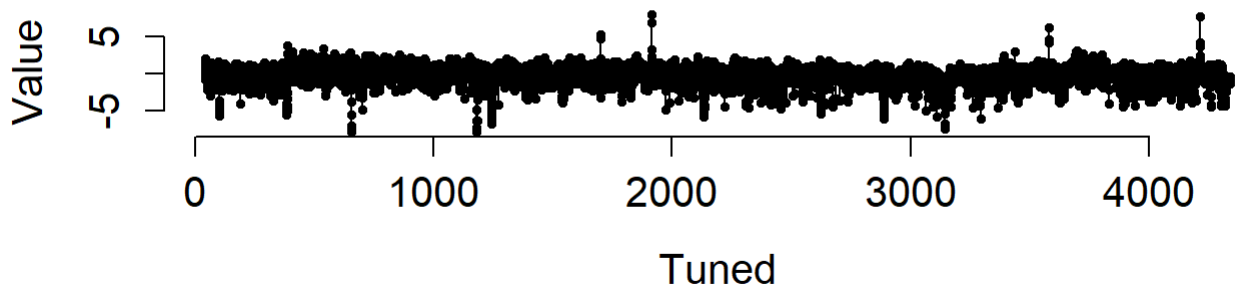

```
#Interpolation every 0.2131761 kyr (= mean saling rate)
alb_Ti_1mm_time <- linterp(Ti_1mm_173_tuned, dt=0.2131761, genplot=T)
```

----- APPLYING PIECEWISE-LINEAR INTERPOLATION TO STRATIGRAPHIC SERIES -----

```
* Number of samples= 20158
* New number of samples= 20157
```

**Raw (black) and Interpolated (red) Data**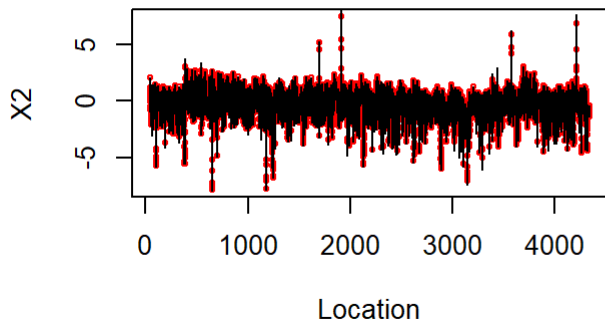**Distribution of Interpolated Values**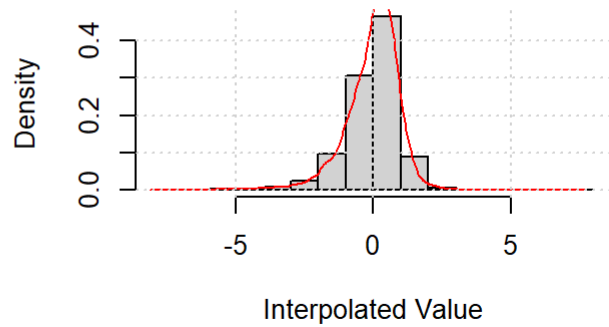**Boxplot of Interpolated Values**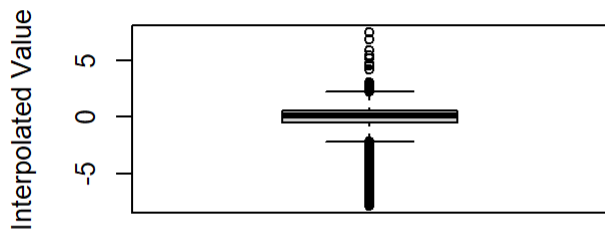**Normal Q-Q Plot**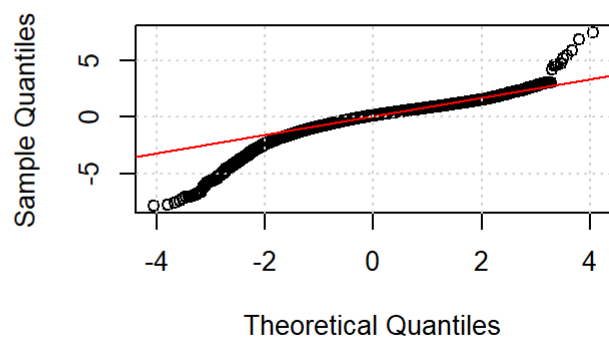

## 10.2. Hilbert analysis

```
#Filter out the 173 kyr long obliquity cycle
alb_Ti_1mm_time_173 <- taner(alb_Ti_1mm_time, xmax=1/100, fhigh=1/155, flow=1/195)
```

----- TANER BANDPASS FILTERING STRATIGRAPHIC SERIES-----

- \* Number of data points= 20157
- \* Sample interval= 0.2131761
- \* Mean value removed= -0.03228278

**Stratigraphic Series**

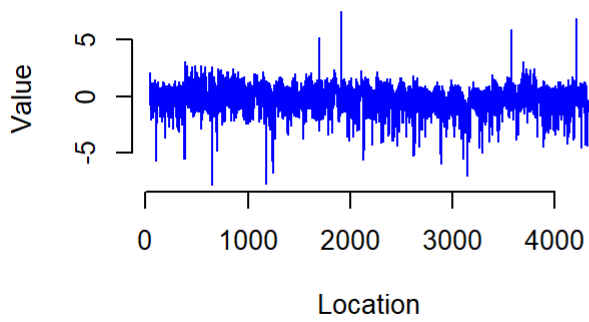

**Amplitude**

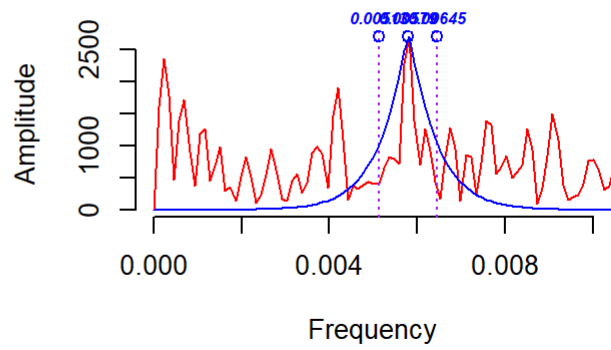

**Bandpassed Signal**

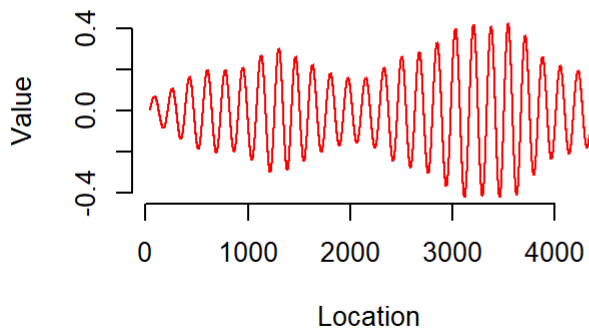

**Comparison**

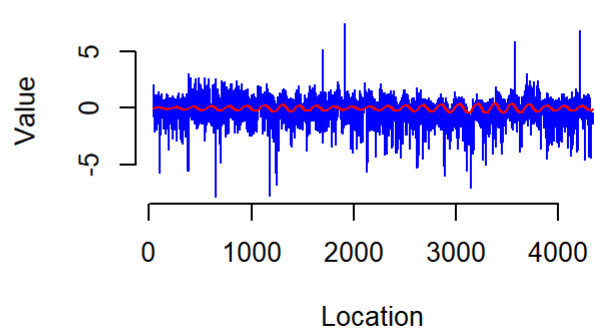

```
#Do the Hilbert transform to extract the amplitude  
alb_Ti_1mm_time_173_hilbert <- hilbert(alb_Ti_1mm_time_173)
```

----- PERFORMING HILBERT TRANSFORM ON STRATIGRAPHIC SERIES -----

```
* Number of data points= 20157  
* Sample interval= 0.2131761  
* Mean value removed= -0.03265143
```

### Amplitude Spectrum for Data

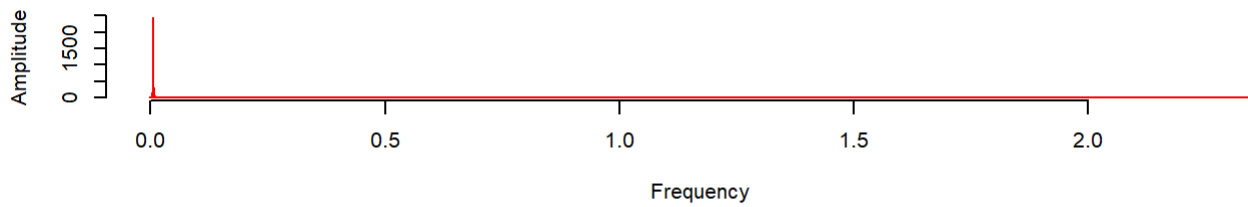

### Instantaneous Amplitude

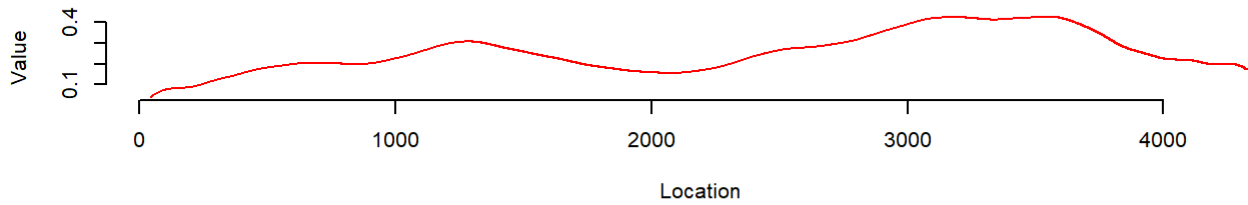

### Comparison

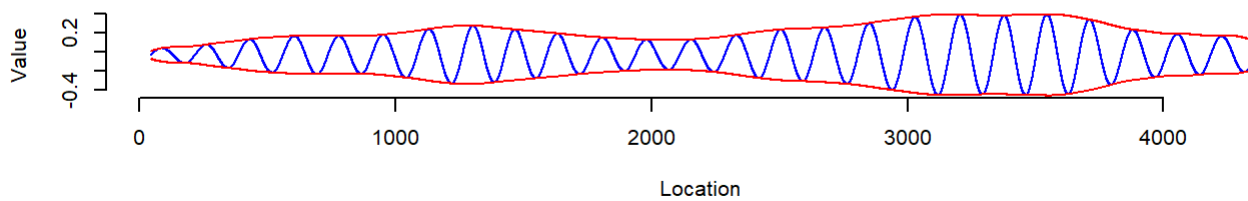

```
#Filter out the 1.2 Myr cycle from the amplitude modulation of the 173 kyr cycle
alb_Ti_1mm_time_173_hilbert_1300 <- taner(alb_Ti_1mm_time_173_hilbert,
      xmax=1/500,
      fhigh=1/1300,
      flow=1/1150,
      detrend=T
    )
```

----- TANER BANDPASS FILTERING STRATIGRAPHIC SERIES-----

```
* Number of data points= 20157
* Sample interval= 0.2131761
* Mean value removed= 0.2545402
* Linear trend removed. m= 4.437838e-05 b= -0.09725471
```

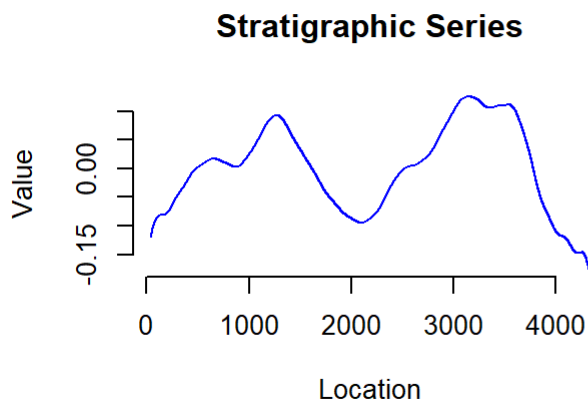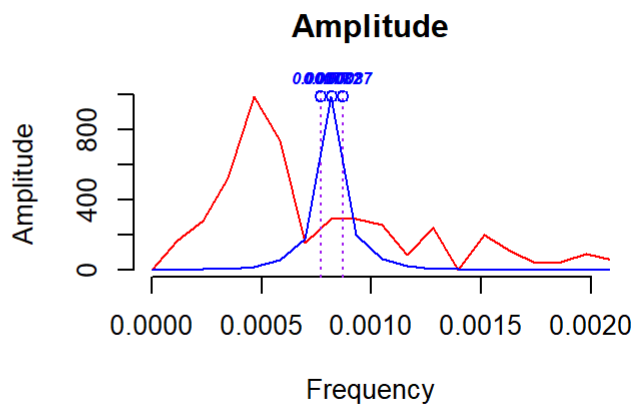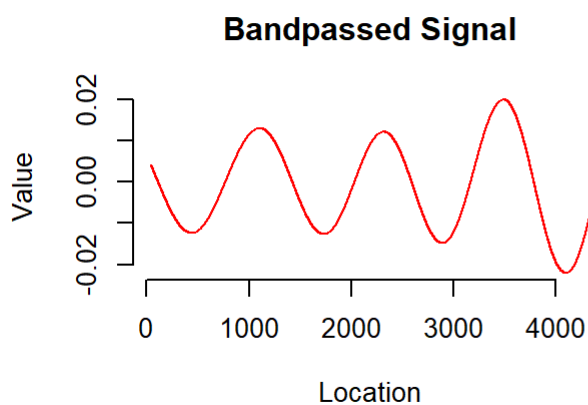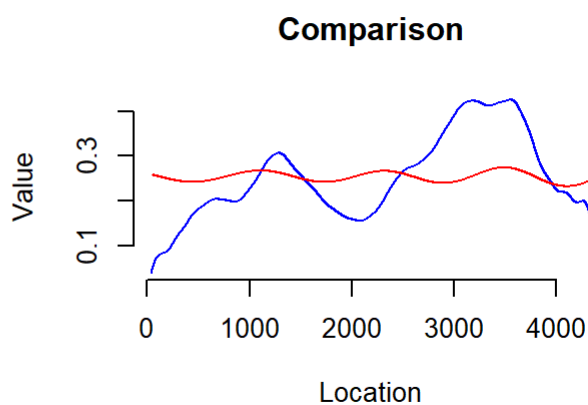

```
#Filter out the 1.2 Myr obliquity cycle directly from the proxy record
alb_Ti_1mm_time_1300 <- taner(alb_Ti_1mm_time,
                              xmax=1/500,
                              fhigh=1/1300,
                              flow=1/1150,
                              demean=T
                              )
```

----- TANER BANDPASS FILTERING STRATIGRAPHIC SERIES-----

```
* Number of data points= 20157
* Sample interval= 0.2131761
* Mean value removed= -0.03228278
```



**Stratigraphic Series**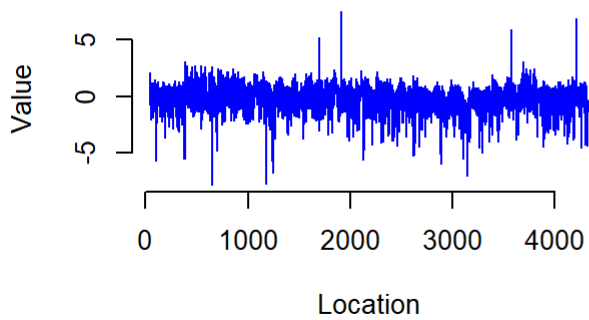**Amplitude**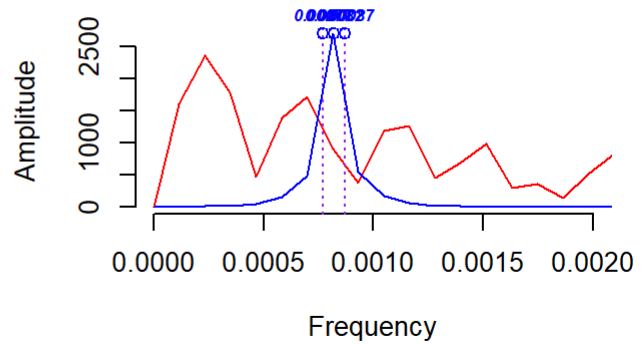**Bandpassed Signal**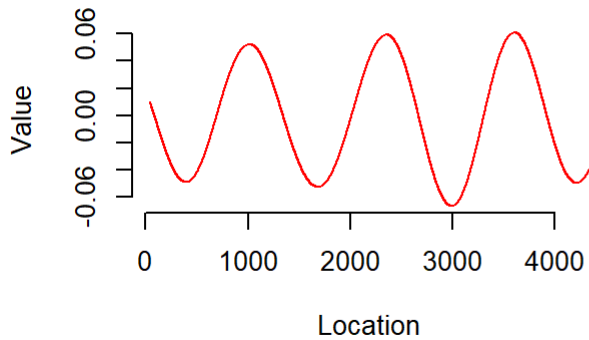**Comparison**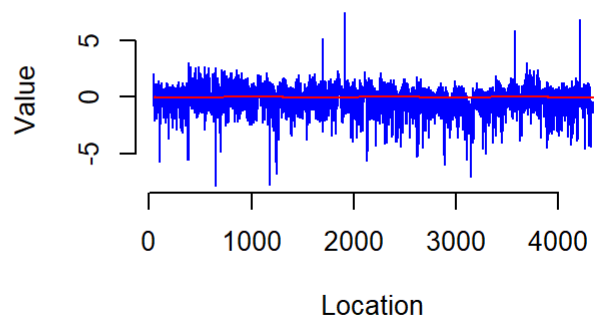

```
#Plot the 1.2 Myr obliquity cycle extracted from the amplitude modulation of the
#173 kyr long obliquity cycle vs the 1.2 Myr obliquity cycle directly extracted
#from the proxy record.
```

```
plot(alb_Ti_1mm_time_1300[,1],
     alb_Ti_1mm_time_1300[,2]-mean(alb_Ti_1mm_time_1300[,2]),
     type="l",
     xlab = "Time (kyr)",
     ylab = "Power")

lines(alb_Ti_1mm_time_173_hilbert_1300[,1],
      alb_Ti_1mm_time_173_hilbert_1300[,2]-mean(alb_Ti_1mm_time_173_hilbert_1300[,2]),
      col="red",
      lwd=2
    )
```

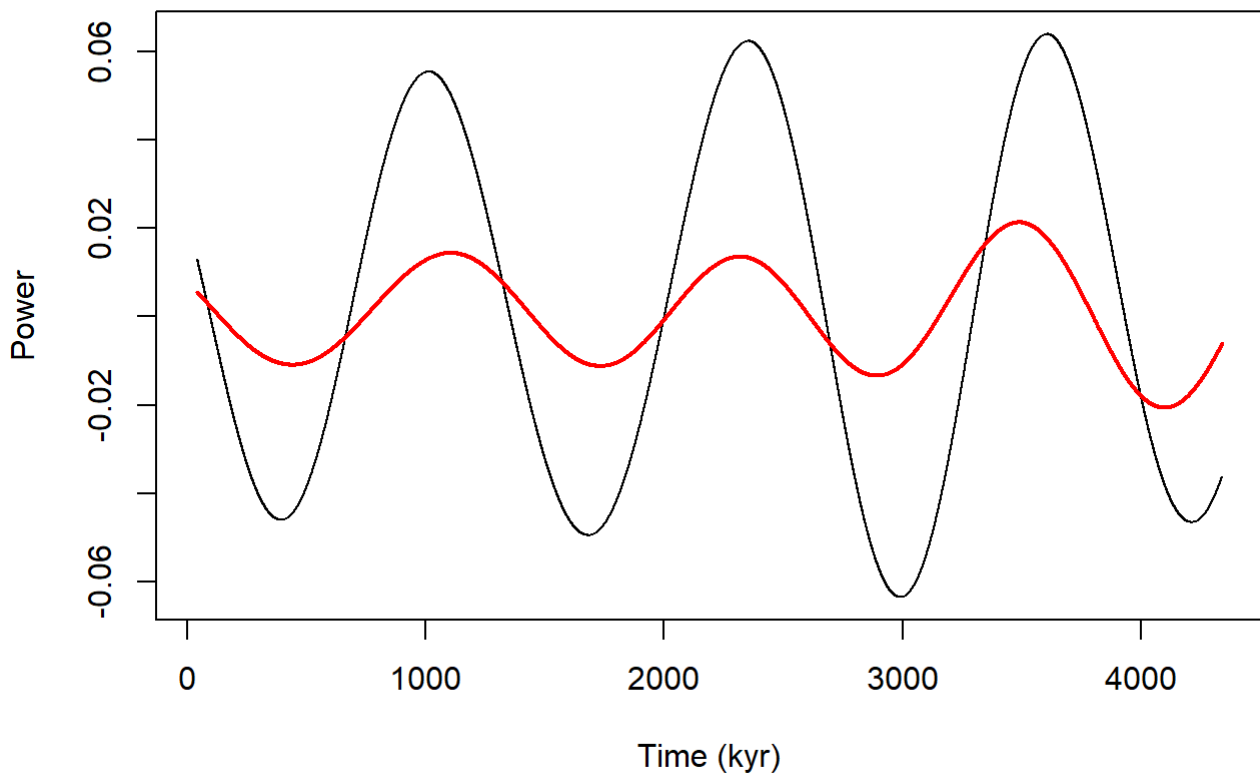

## Step 11: Age-depth model and sedimentation rate based on 4 proxy comparison

### 11.1. Age-Depth model (bandpass filtering)

#### 11.1.1. Minimal\_tuning function

```
minimal_tuning <- function (data = NULL, pts = 5, cycle = 173, tune_opt = "max",
                             output = 0, genplot = FALSE, keep_editable = FALSE)
{
  astro_mindetect <- as.data.frame(data)
  astro_mindetect$min <- 0
  for (i in pts:(nrow(data) - pts)) {
    if ((data[i, 2] - data[i + pts, 2] < 0) & (data[i,
                                                                                               2] - data[i - (pts - 1)], 2] < 0)) {
      astro_mindetect[i, 3] <- 1
    }
  }
  astro_mindetect_error_corr <- astro_mindetect
  astro_mindetect_error_corr <- astro_mindetect_error_corr[astro_mindetect_error_corr$min ==
                                                             1, ]

  astro_maxdetect <- as.data.frame(data)
  astro_maxdetect$max <- 0
  for (i in pts:(nrow(data) - pts)) {
    if ((data[i, 2] - data[i + pts, 2] > 0) & (data[i,
                                                                                               2] - data[i - (pts - 1)], 2] > 0)) {
```

```

    astro_maxdetect[i, 3] <- 1
  }
}
astro_maxdetect_error_corr <- astro_maxdetect
astro_maxdetect_error_corr <- astro_maxdetect_error_corr[astro_maxdetect_error_corr$max ==
  1, ]

max <- astro_maxdetect_error_corr
colnames(max) <- c("A", "B", "C")
min <- astro_mindetect_error_corr
colnames(min) <- c("A", "B", "C")
min[, 3] <- -1
peaks <- rbind(max, min)
peaks <- peaks[order(peaks[, 1]), ]
i <- 1
res_rownr <- nrow(peaks)
while (i < res_rownr) {
  if ((i < res_rownr) & (peaks[i, 3] == peaks[(i + 1),
    3])) {
    if ((i < res_rownr) & (peaks[i, 3] == 1 & peaks[(i +
      1), 3] == 1) & (peaks[i, 2] > peaks[(i + 1),
        2])) {
      peaks[(i + 1), ] <- NA
      peaks <- na.omit(peaks)
      res_rownr <- res_rownr - 1
    }
    if ((i < res_rownr) & (peaks[i, 3] == 1 & peaks[(i +
      1), 3] == 1) & (peaks[i, 2] < peaks[(i + 1),
        2])) {
      peaks[i, ] <- NA
      peaks <- na.omit(peaks)
      res_rownr <- res_rownr - 1
    }
  }
  if ((i < res_rownr) & (peaks[i, 3] == -1 & peaks[(i +
    1), 3] == -1) & (peaks[i, 2] < peaks[(i + 1),
      2])) {
    peaks[(i + 1), ] <- NA
    peaks <- na.omit(peaks)
    res_rownr <- res_rownr - 1
  }
  if ((i < res_rownr) & (peaks[i, 3] == -1 & peaks[(i +
    1), 3] == -1) & (peaks[i, 2] > peaks[(i + 1),
      2])) {
    peaks[i, ] <- NA
    peaks <- na.omit(peaks)
    res_rownr <- res_rownr - 1
  }
}
if ((peaks[i, 3] != peaks[(i + 1), 3]) | is.na(peaks[i,
  3] != peaks[(i + 1), 3])) {
  i <- i + 1
}
}
if (tune_opt == "min") {
  peaks_min <- peaks[peaks[, 3] < 0, ]
  dist <- peaks_min[2:(nrow(peaks_min)), ] - peaks_min[1:(nrow(peaks_min) -
    1), ]

  sed_rate <- (dist[, 1] * 100)/cycle
  sed_rate <- cbind(sed_rate, peaks_min[1:(nrow(peaks_min) -

```

```

1), 1], peaks_min[2:(nrow(peaks_min)), 1])
}
if (tune_opt == "max") {
  peaks_min <- peaks[peaks[, 3] > 0, ]
  dist <- peaks_min[2:(nrow(peaks_min)), ] - peaks_min[1:(nrow(peaks_min) -
                                                                1), ]

  sed_rate <- (dist[, 1] * 100)/cycle
  sed_rate <- cbind(sed_rate, peaks_min[1:(nrow(peaks_min) -
                                                                1), 1], peaks_min[2:(nrow(peaks_min)), 1])
}
if (tune_opt == "minmax") {
  peaks_min <- peaks
  dist <- peaks_min[2:(nrow(peaks_min)), ] - peaks_min[1:(nrow(peaks_min) -
                                                                1), ]

  sed_rate <- (dist[, 1] * 100)/(cycle/2)
  sed_rate <- cbind(sed_rate, peaks_min[1:(nrow(peaks_min) -
                                                                1), 1], peaks_min[2:(nrow(peaks_min)), 1])
}
top <- c(sed_rate[1, 1], data[1, 1], sed_rate[1, 2])
bot <- c(sed_rate[nrow(sed_rate), 1], sed_rate[nrow(sed_rate),
                                                                3], data[nrow(data), 1])

sed_rate <- rbind(top, sed_rate, bot)
data[, 3] <- NA
p <- 1
for (i in 1:nrow(data)) {
  if (data[i, 1] < sed_rate[p, 2]) {
    data[i, 3] <- sed_rate[p, 1]
  }
  if (data[i, 1] == sed_rate[p, 2] & p + 1 <= nrow(sed_rate)) {
    data[i, 3] <- (sed_rate[p, 1] + sed_rate[(p + 1),
                                                                1])/2
  }
  if (p > nrow(sed_rate)) {
    p <- nrow(sed_rate)
  }
  if (p == nrow(sed_rate)) {
    data[i, 3] <- sed_rate[nrow(sed_rate), 1]
  }
  if (data[i, 1] > sed_rate[p, 2]) {
    data[i, 3] <- sed_rate[p, 1]
  }
  if (data[i, 1] == sed_rate[p, 3] & p + 1 <= nrow(sed_rate)) {
    p <- p + 1
  }
}
tracked_cycle_curve <- data[, c(1, 3)]
sedrates <- data.frame(tracked_cycle_curve)
dat <- as.matrix(tracked_cycle_curve)
dat <- na.omit(dat)
dat <- dat[order(dat[, 1], na.last = NA, decreasing = F),
]
npts <- length(dat[, 1])
start <- dat[1, 1]
end <- dat[length(dat[, 1]), 1]
x1 <- dat[1:(npts - 1), 1]
x2 <- dat[2:(npts), 1]
dx = x2 - x1
dt = median(dx)

```

```

xout <- seq(start, end, by = dt)
npts <- length(xout)
interp <- approx(dat[, 1], dat[, 2], xout, method = "linear",
                 n = npts)
sedrates <- as.data.frame(interp)
npts <- length(sedrates[, 1])
sedrates[1] = sedrates[1] * 100
sedrates[2] = 1/sedrates[2]
dx = sedrates[2, 1] - sedrates[1, 1]
midptx = (sedrates[2:npts, 1] + sedrates[1:(npts - 1), 1])/2
slope = (sedrates[2:npts, 2] - sedrates[1:(npts - 1), 2])/dx
yint = sedrates[2:npts, 2] - (slope * sedrates[2:npts, 1])
midpty = (slope * midptx) + yint
hsum = cumsum(midpty * dx)
hsum = append(0, hsum)
out = data.frame(cbind(sedrates[, 1]/100, hsum))
data[, 4] <- out[, 2]
colnames(data) <- c("depth", "proxy", "cm/kyr", "time")
if (output == 0) {
  data <- data
  if (genplot == TRUE) {
    if (keep_editable == FALSE) {
      oldpar <- par(no.readonly = TRUE)
      on.exit(par(oldpar))
    }
    layout.matrix <- matrix(c(1, 2, 3, 4), nrow = 4,
                             ncol = 1)
    graphics::layout(mat = layout.matrix, heights = c(1),
                     widths = c(1))
    par(mar = c(4, 4, 1, 1))
    plot(x = data[, 1], y = data[, 2], type = "l", main = "Data depth domain",
         xlab = "meters", ylab = "proxy")
    plot(x = data[, 1], y = data[, 3], type = "l", xlab = "meters",
         ylab = "cm/kyr (ka)", main = "sedimentation rate plot")
    plot(data[, 1], data[, 4], type = "l", xlab = "meters",
         ylab = "Time (ka)", main = "Data time domain")
    plot(data[, 4], data[, 2], type = "l", xlab = "time (ka)",
         ylab = "proxy", main = "Data time domain")
  }
}
if (output == 1) {
  data <- data[, c(1, 3)]
  if (genplot == TRUE) {
    if (keep_editable == FALSE) {
      oldpar <- par(no.readonly = TRUE)
      on.exit(par(oldpar))
    }
    layout.matrix <- matrix(c(1), nrow = 1, ncol = 1)
    graphics::layout(mat = layout.matrix, heights = c(1),
                     widths = c(1))
    par(mar = c(4, 4, 1, 1))
    plot(x = data[, 1], y = data[, 2], type = "l", xlab = "meters",
         ylab = "cm/kyr (ka)", main = "sedimentation rate plot")
  }
}
if (output == 2) {
  data <- data[, c(1, 4)]
  if (genplot == TRUE) {

```

```

    if (keep_editable == FALSE) {
      oldpar <- par(no.readonly = TRUE)
      on.exit(par(oldpar))
    }
    layout.matrix <- matrix(c(1), nrow = 1, ncol = 1)
    graphics::layout(mat = layout.matrix, heights = c(1),
                      widths = c(1))
    par(mar = c(4, 4, 1, 1))
    plot(data[, 1], data[, 2], type = "l", xlab = "meters",
          ylab = "Time (ka)", main = "Data time domain")
  }
}
return(data)
}

```

## 11.1.2. Taner filtering of the detrital elements in depth domain

### 11.1.2.1. Titanium

```

alb_Ti <- cbind(Alb$DepthAdj, Alb$Ti)
alb_Ti <- na.omit(alb_Ti)
alb_Ti[!is.finite(alb_Ti)] <- NA
alb_Ti <- na.omit(alb_Ti)
alb_Ti <- iso(dat=alb_Ti, xmin=73.453, xmax=93.609)

```

----- ISOLATE STRATIGRAPHIC DATA BY LOCATION -----

- \* Number of data points= 30577
- \* Number of columns= 2
- \* Minimum= 62.111 , Maximum= 93.61
- \* Isolating data between 73.453 and 93.609
- \* Number of data points following culling= 19310

**Stratigraphic Series**

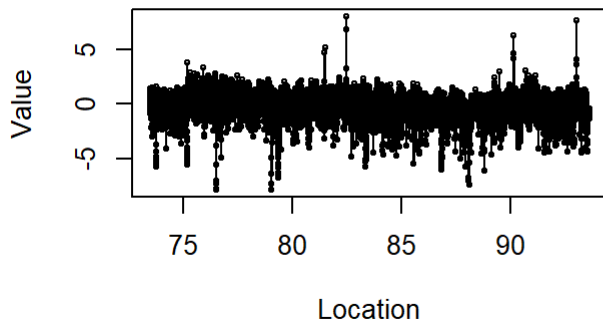

**Distribution of Isolated Values**

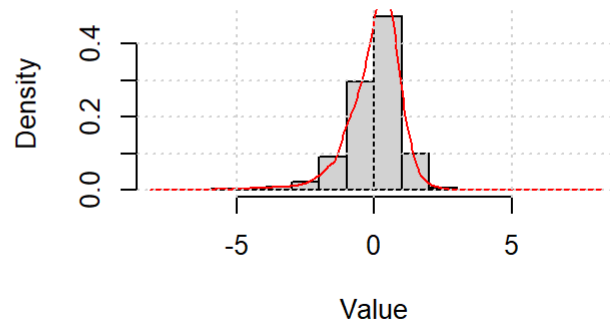

**Boxplot for Isolated Values**

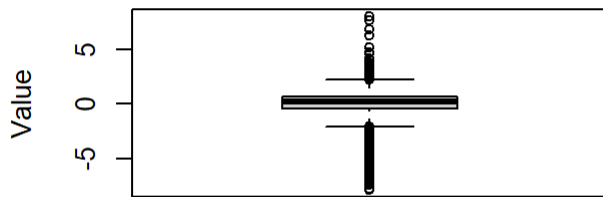

**Normal Q-Q Plot**

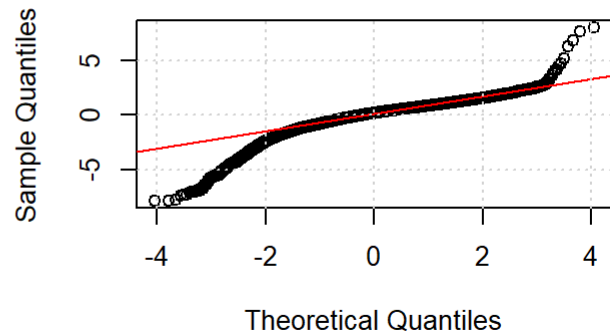

```
alb_Ti <- linterp(alb_Ti, dt=0.005, genplot=T)
```

----- APPLYING PIECEWISE-LINEAR INTERPOLATION TO STRATIGRAPHIC SERIES -----

- \* Number of samples= 19310
- \* New number of samples= 4032

**Raw (black) and Interpolated (red) Data**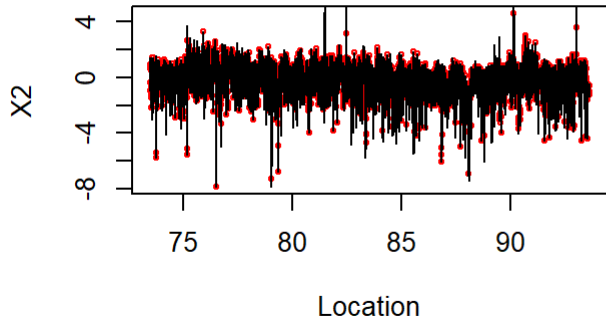**Distribution of Interpolated Values**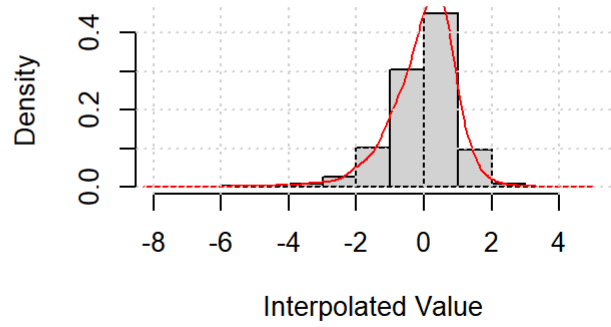**Boxplot of Interpolated Values**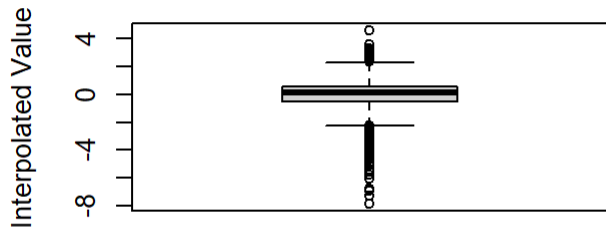**Normal Q-Q Plot**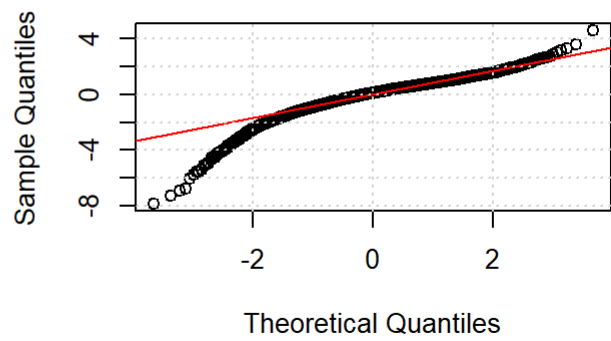

```
Ti_173R <- taner(alb_Ti,xmax=2,fhigh=1/0.97,flow=1/0.75,demean=TRUE)
```

----- TANER BANDPASS FILTERING STRATIGRAPHIC SERIES-----

- \* Number of data points= 4032
- \* Sample interval= 0.005
- \* Mean value removed= -0.04021631



**Stratigraphic Series**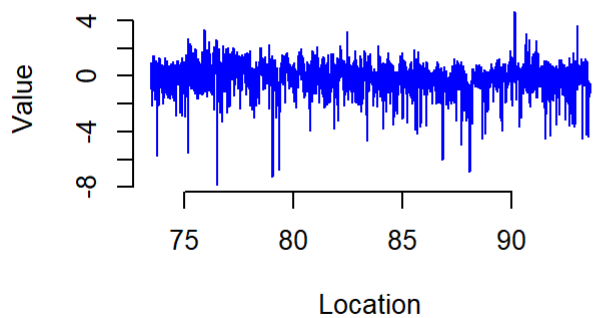**Amplitude**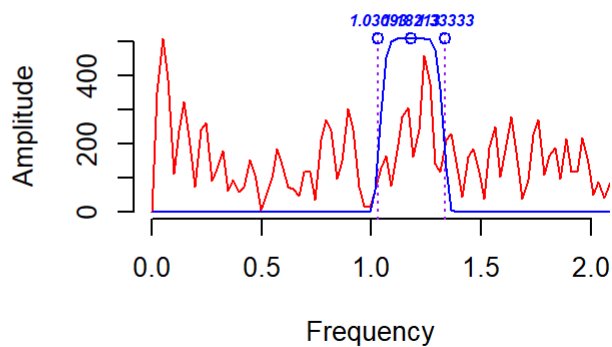**Bandpassed Signal**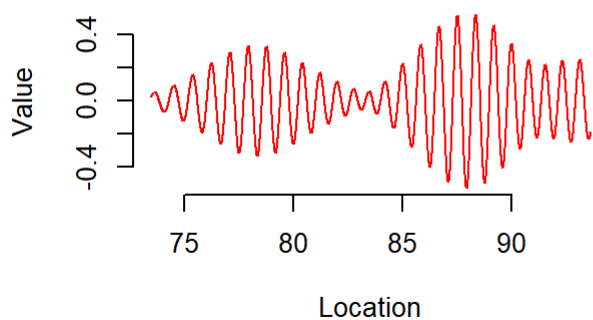**Comparison**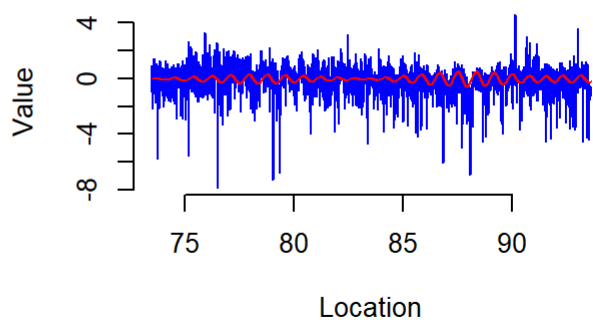

```
Ti_173R_min_tun <- minimal_tuning(data = Ti_173R,
                                   pts = 20,
                                   cycle = 173,
                                   tune_opt = "min",
                                   output = 0,
                                   genplot = TRUE,
                                   keep_editable = FALSE
                                   )
```

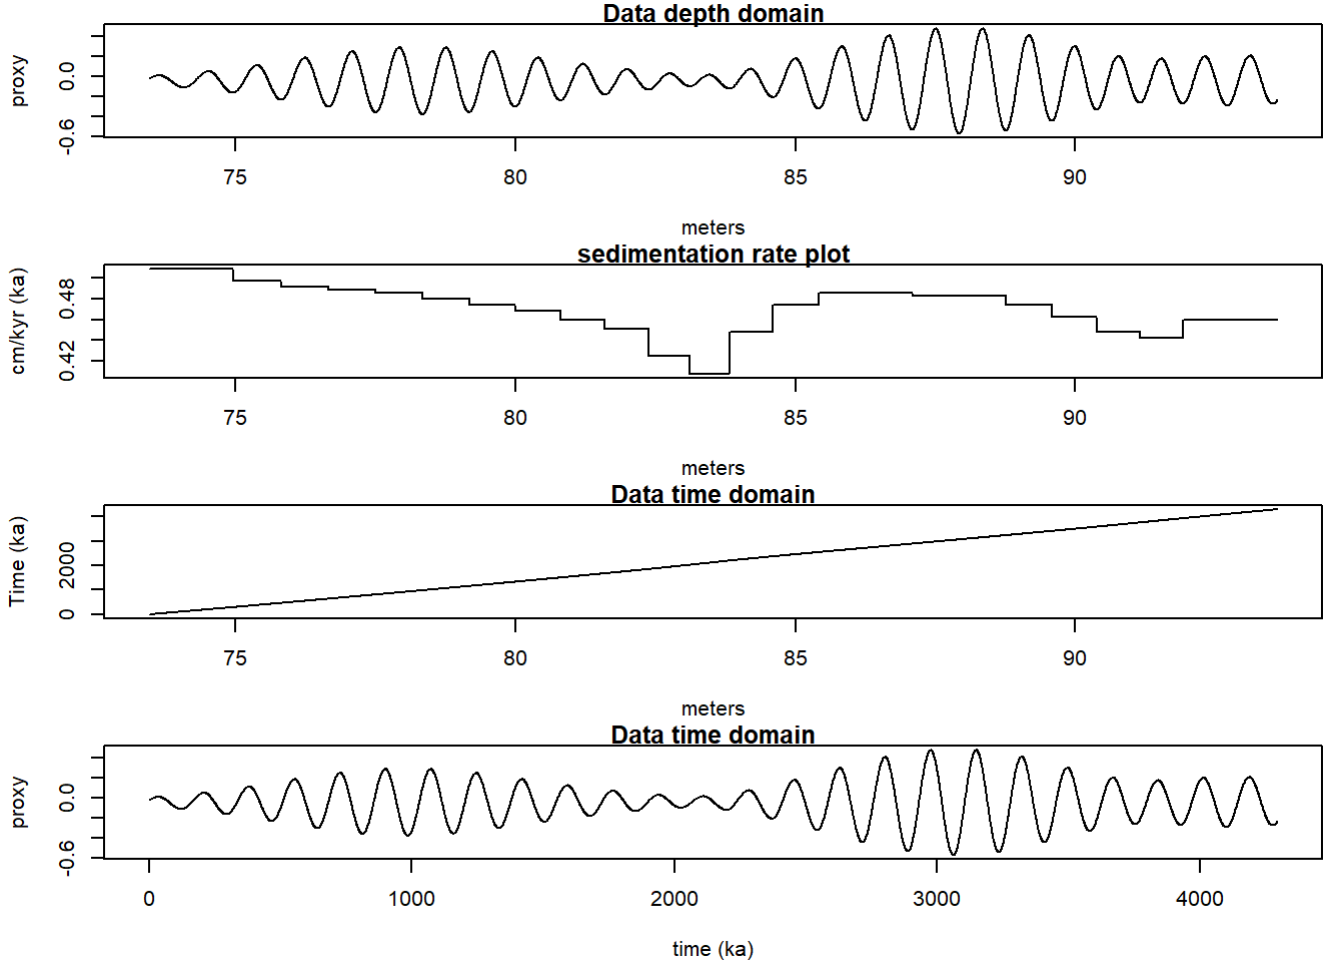

```
colnames(Ti_173R_min_tun)<-c("Ti Depth","Ti","Ti SR","Ti time")
```

### 11.1.2.2. Silicon

```
alb_Si <- cbind(Alb$DepthAdj,Alb$Si)
alb_Si <- na.omit(alb_Si)
alb_Si[!is.finite(alb_Si)] <- NA
alb_Si <- na.omit(alb_Si)
alb_Si <- iso(dat=alb_Si, xmin=73.453, xmax=93.609)
```

----- ISOLATE STRATIGRAPHIC DATA BY LOCATION -----

- \* Number of data points= 30577
- \* Number of columns= 2
- \* Minimum= 62.111 , Maximum= 93.61
- \* Isolating data between 73.453 and 93.609
- \* Number of data points following culling= 19310

**Stratigraphic Series**

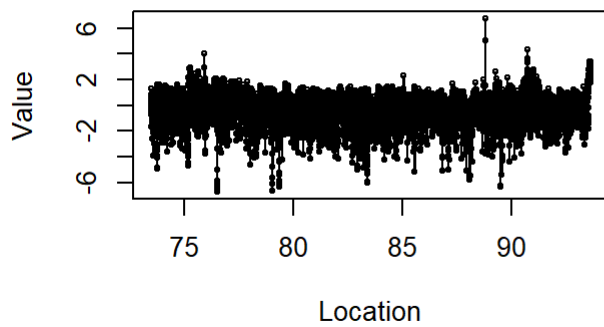

**Distribution of Isolated Values**

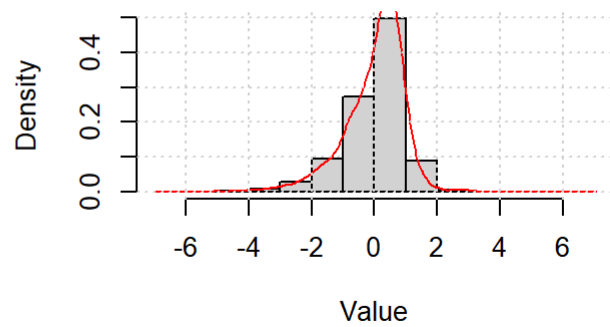

**Boxplot for Isolated Values**

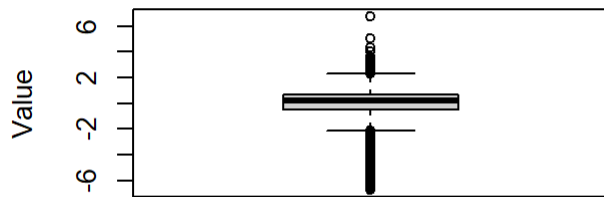

**Normal Q-Q Plot**

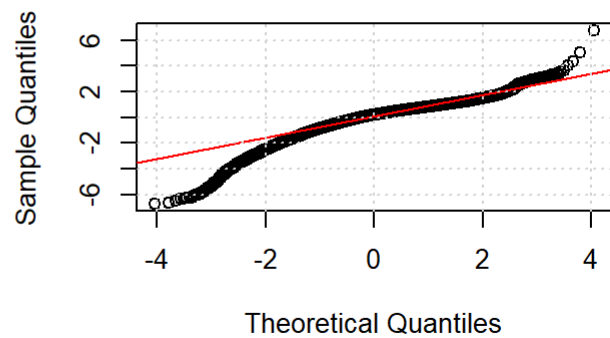

```
alb_Si <- linterp(alb_Si, dt=0.005, genplot=T)
```

----- APPLYING PIECEWISE-LINEAR INTERPOLATION TO STRATIGRAPHIC SERIES -----

\* Number of samples= 19310

\* New number of samples= 4032

Raw (black) and Interpolated (red) Data

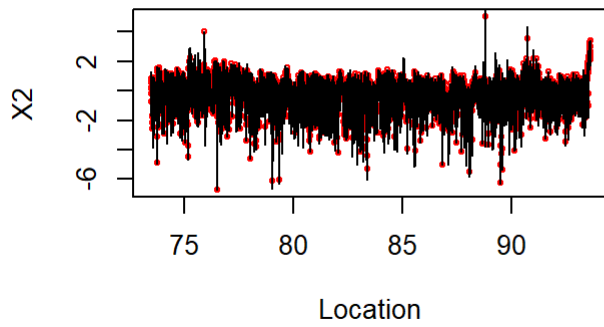

Distribution of Interpolated Values

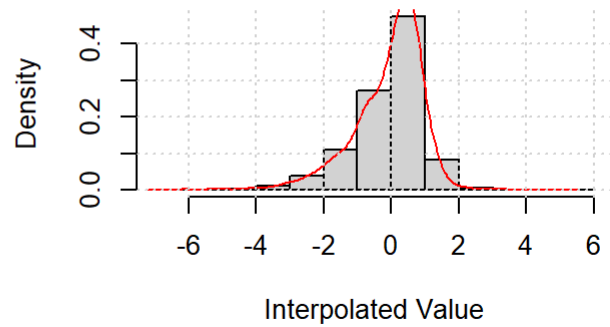

Boxplot of Interpolated Values

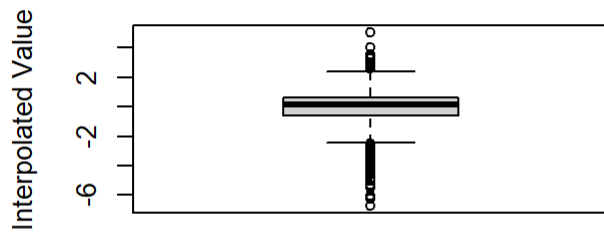

Normal Q-Q Plot

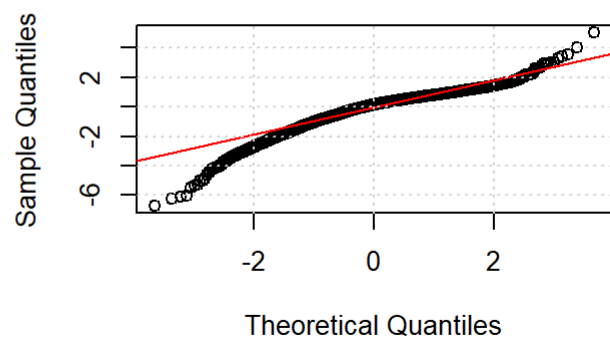

```
Si_173R <- taner(alb_Si,xmax=2,fhigh=1/0.97,flow=1/0.75,demean=TRUE)
```

----- TANER BANDPASS FILTERING STRATIGRAPHIC SERIES-----

- \* Number of data points= 4032
- \* Sample interval= 0.005
- \* Mean value removed= -0.0791156

**Stratigraphic Series**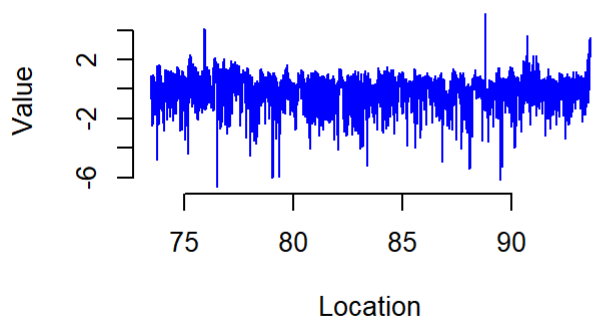**Amplitude**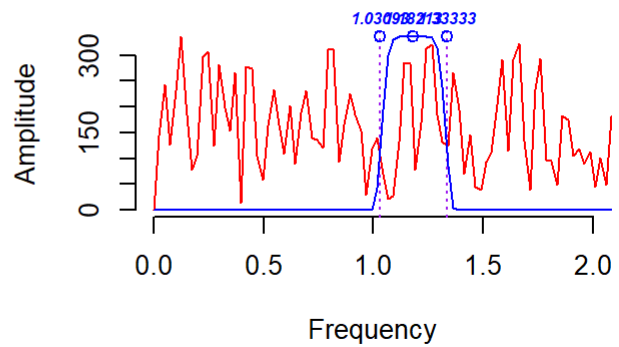**Bandpassed Signal**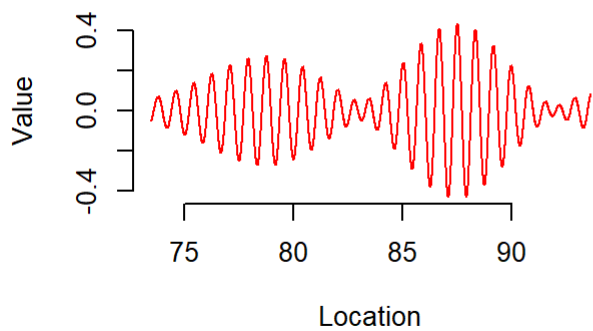**Comparison**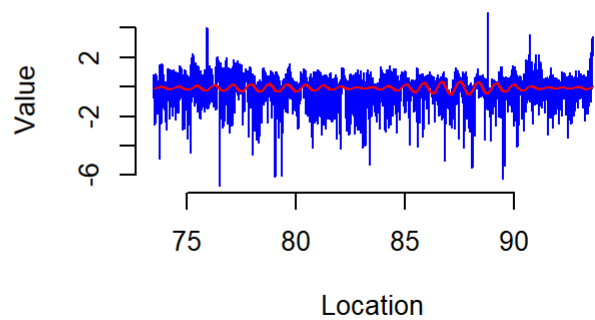

```
Si_173R_min_tun <- minimal_tuning(data = Si_173R,
                                   pts = 20,
                                   cycle = 173,
                                   tune_opt = "min",
                                   output = 0,
                                   genplot = TRUE,
                                   keep_editable = FALSE
                                   )
```

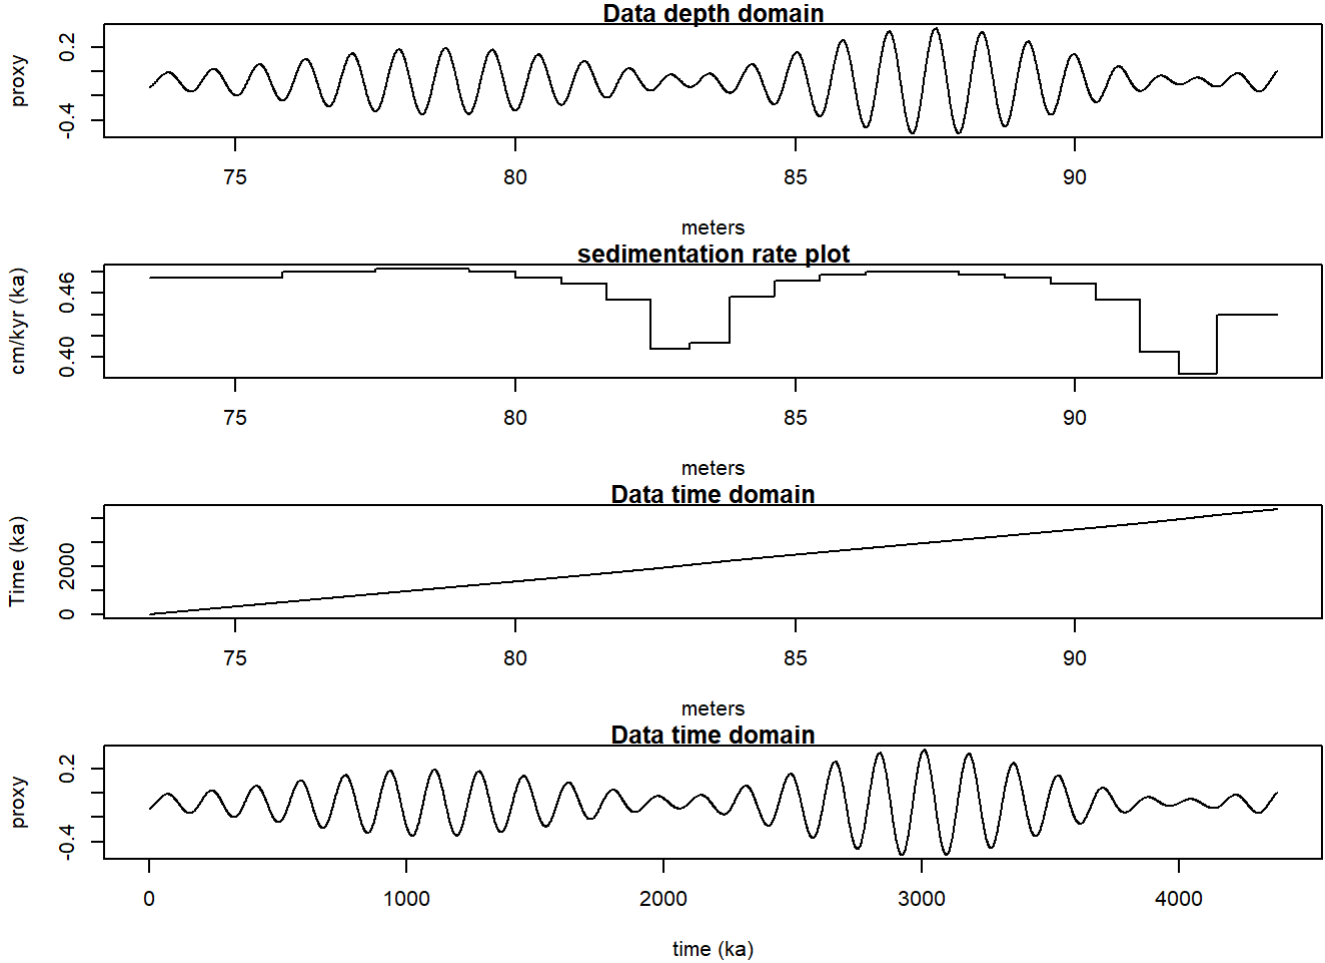

```
colnames(Si_173R_min_tun)<-c("Si Depth","Si","Si SR","Si time")
```

### 11.1.2.3. Aluminium

```
alb_Al <- cbind(Alb$DepthAdj,Alb$Al)
alb_Al <- na.omit(alb_Al)
alb_Al[!is.finite(alb_Al)] <- NA
alb_Al <- na.omit(alb_Al)
alb_Al <- iso(dat=alb_Al, xmin=73.453, xmax=93.609)
```

----- ISOLATE STRATIGRAPHIC DATA BY LOCATION -----

- \* Number of data points= 30062
- \* Number of columns= 2
- \* Minimum= 62.111 , Maximum= 93.609
- \* Isolating data between 73.453 and 93.609
- \* Number of data points following culling= 18796

**Stratigraphic Series**

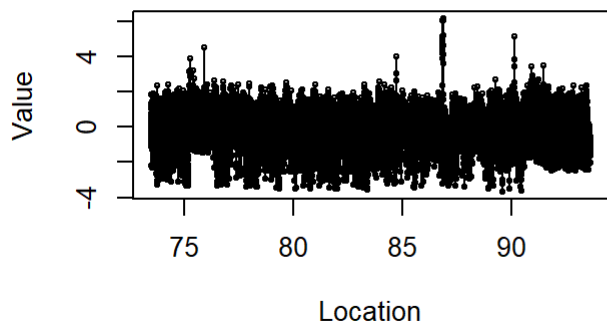

**Distribution of Isolated Values**

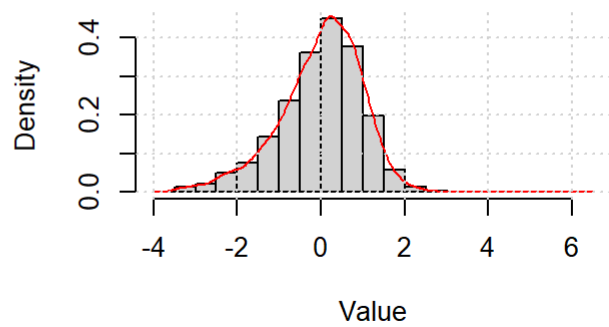

**Boxplot for Isolated Values**

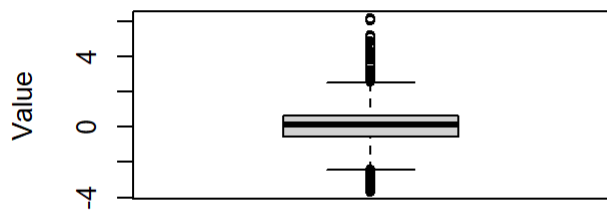

**Normal Q-Q Plot**

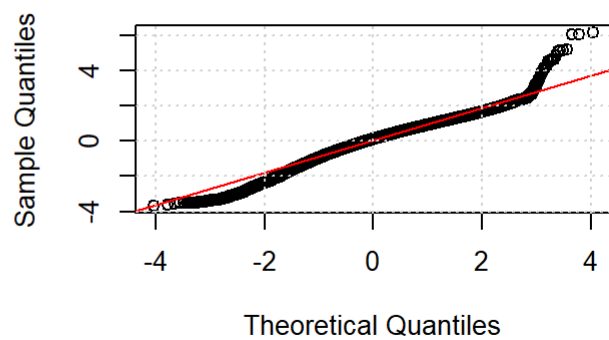

```
alb_A1 <- linterp(alb_A1, dt=0.005, genplot=T)
```

----- APPLYING PIECEWISE-LINEAR INTERPOLATION TO STRATIGRAPHIC SERIES -----

\* Number of samples= 18796

\* New number of samples= 4032

Raw (black) and Interpolated (red) Data

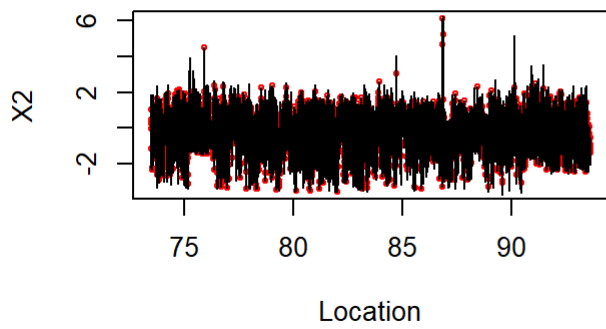

Distribution of Interpolated Values

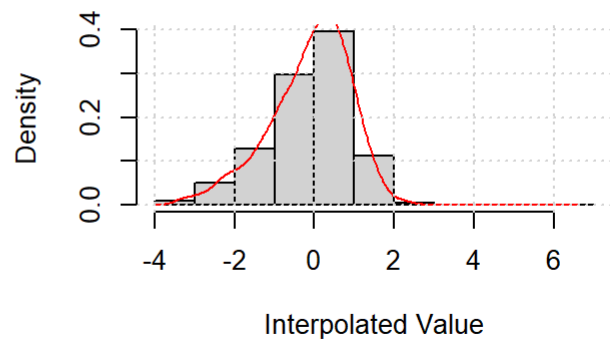

Boxplot of Interpolated Values

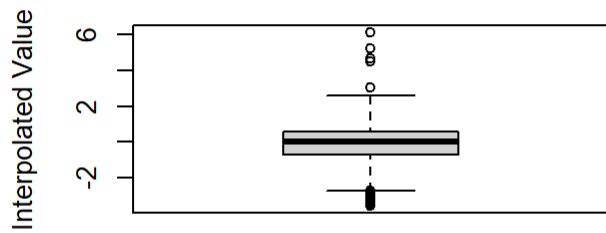

Normal Q-Q Plot

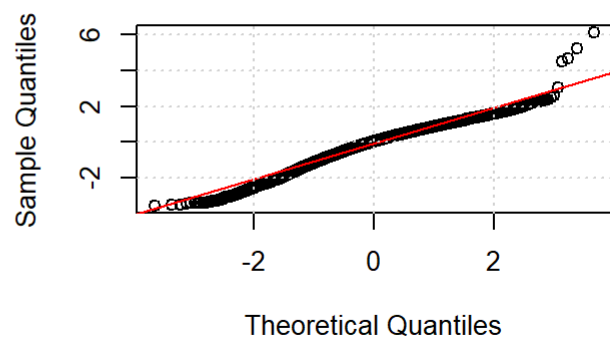

```
Al_173R <- taner(alb_Al,xmax=2,fhigh=1/0.97,flow=1/0.75,demean=TRUE)
```

----- TANER BANDPASS FILTERING STRATIGRAPHIC SERIES-----

- \* Number of data points= 4032
- \* Sample interval= 0.005
- \* Mean value removed= -0.1067612



**Stratigraphic Series**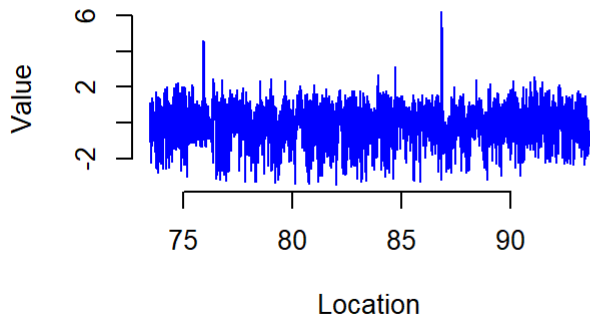**Amplitude**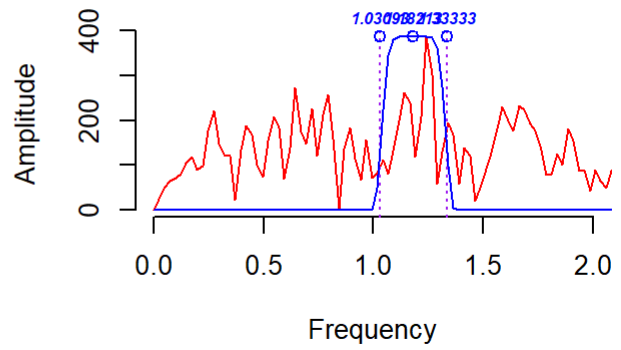**Bandpassed Signal**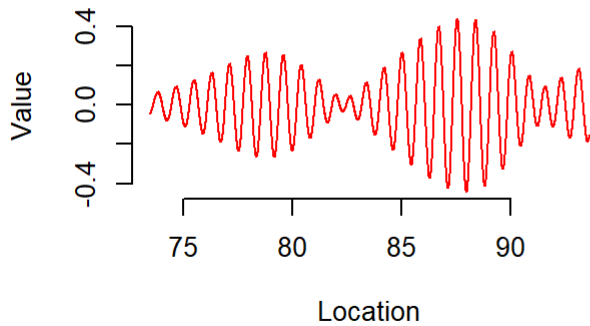**Comparison**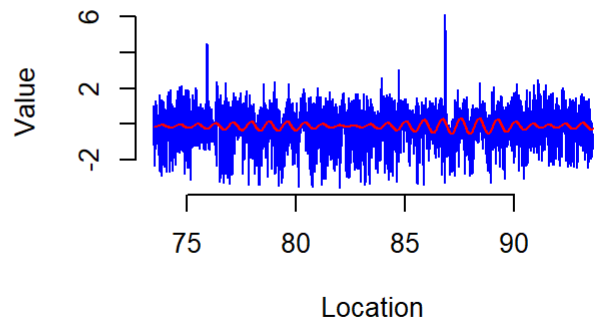

```

Al_173R_min_tun <- minimal_tuning(data = Al_173R,
                                   pts = 20,
                                   cycle = 173,
                                   tune_opt = "min",
                                   output = 0,
                                   genplot = TRUE,
                                   keep_editable = FALSE
                                   )

```

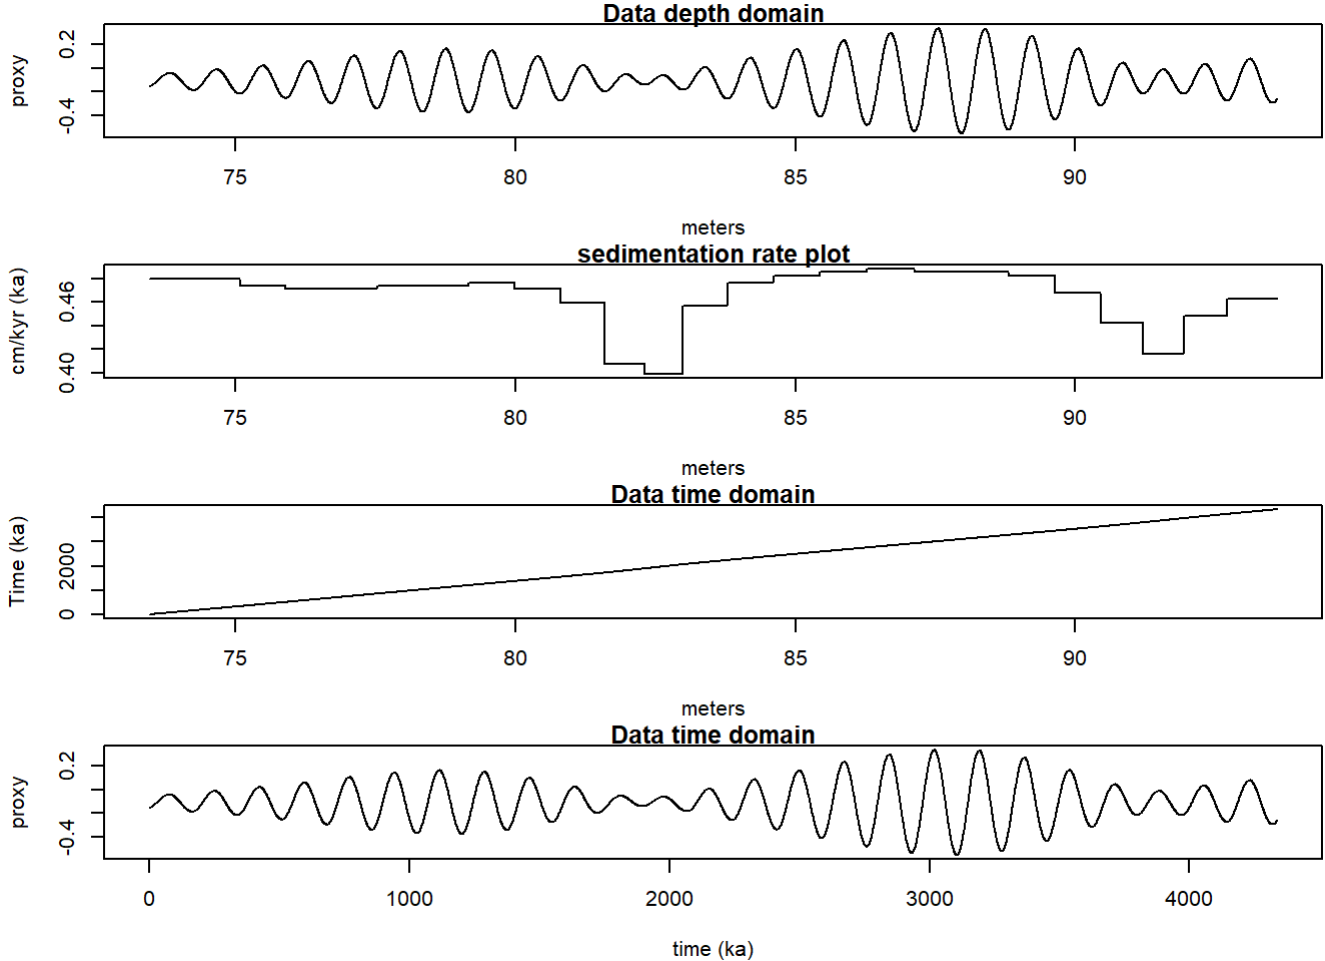

```
colnames(Al_173R_min_tun)<-c("Al Depth","Al","Al SR","Al time")
```

### 11.1.2.4. Potassium

```
alb_K <- cbind(Alb$DepthAdj,Alb$K)
alb_K <- na.omit(alb_K)
alb_K[!is.finite(alb_K)] <- NA
alb_K <- na.omit(alb_K)
alb_K <- iso(dat=alb_K, xmin=73.453, xmax=93.609)
```

----- ISOLATE STRATIGRAPHIC DATA BY LOCATION -----

- \* Number of data points= 19311
- \* Number of columns= 2
- \* Minimum= 73.453 , Maximum= 93.61
- \* Isolating data between 73.453 and 93.609
- \* Number of data points following culling= 19310

**Stratigraphic Series**

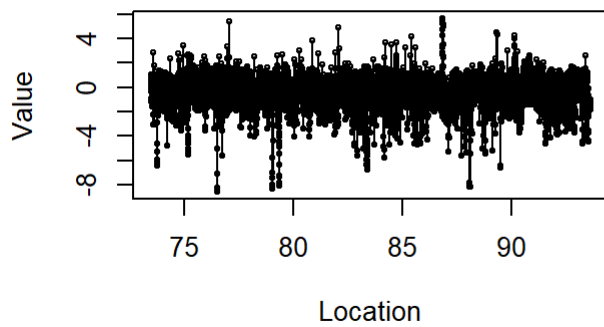

**Distribution of Isolated Values**

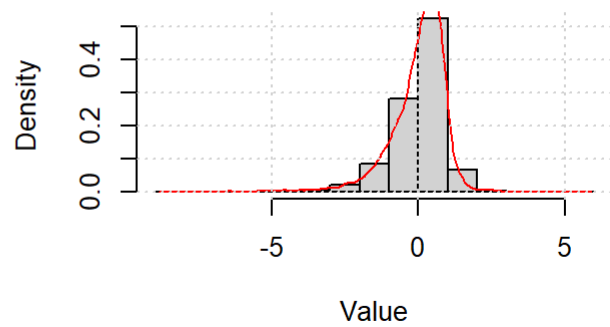

**Boxplot for Isolated Values**

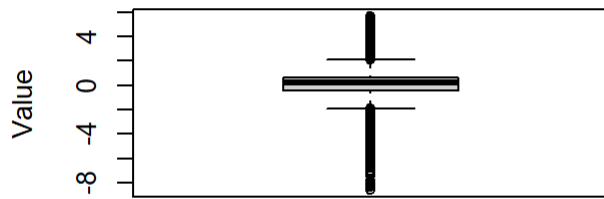

**Normal Q-Q Plot**

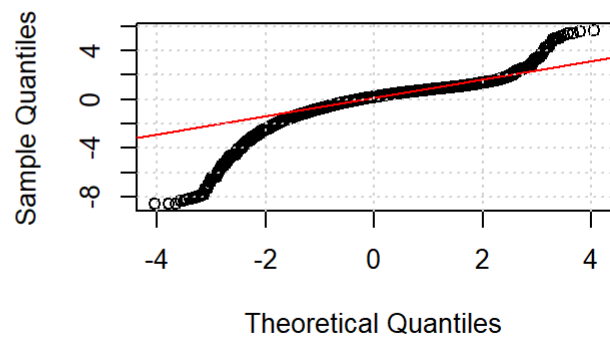

```
alb_K <- linterp(alb_K, dt=0.005, genplot=T)
```

----- APPLYING PIECEWISE-LINEAR INTERPOLATION TO STRATIGRAPHIC SERIES -----

\* Number of samples= 19310

\* New number of samples= 4032

**Raw (black) and Interpolated (red) Data**

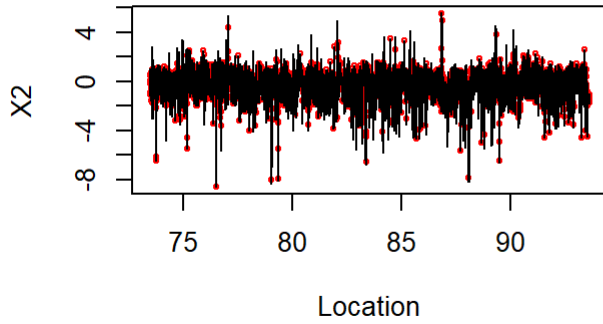

**Distribution of Interpolated Values**

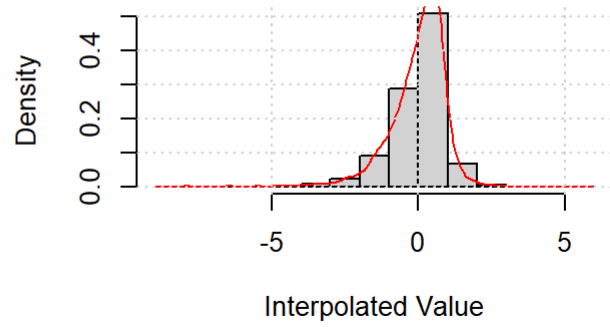

**Boxplot of Interpolated Values**

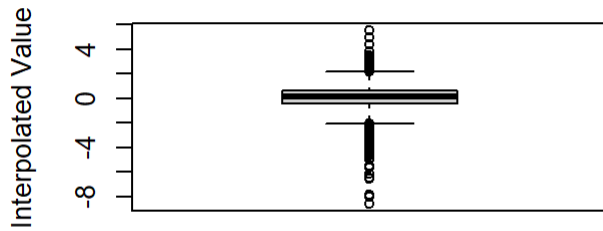

**Normal Q-Q Plot**

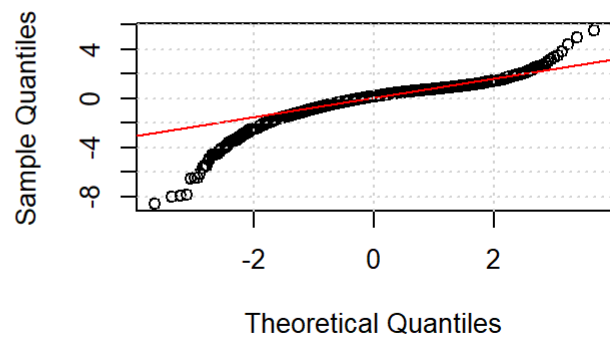

```
K_173R <- taner(alb_K,xmax=2,fhigh=1/0.97,flow=1/0.75,demean=TRUE)
```

----- TANER BANDPASS FILTERING STRATIGRAPHIC SERIES-----

- \* Number of data points= 4032
- \* Sample interval= 0.005
- \* Mean value removed= -0.01677853

**Stratigraphic Series**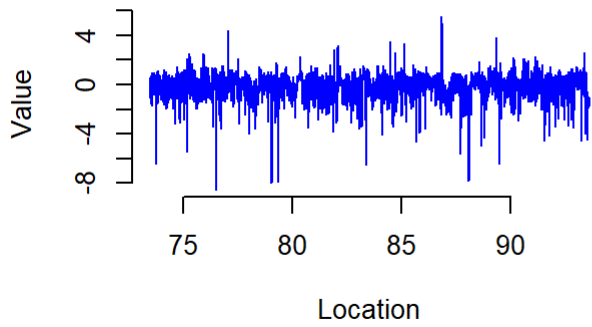**Amplitude**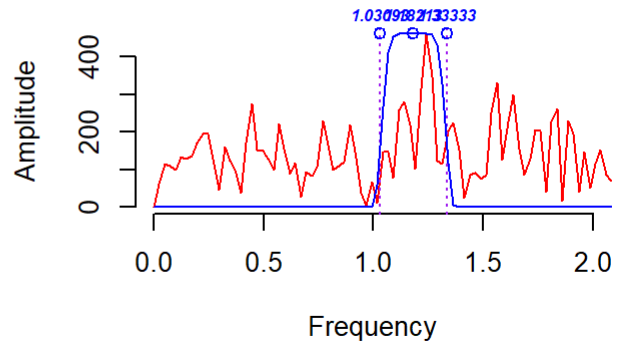**Bandpassed Signal**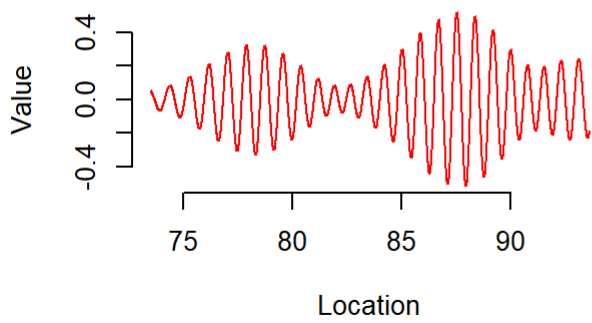**Comparison**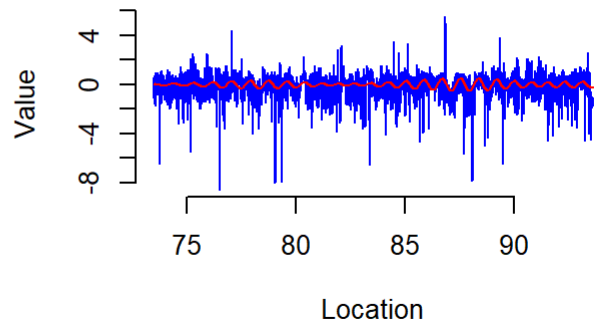

```
K_173R_min_tun <- minimal_tuning(data = K_173R,
                                  pts = 20,
                                  cycle = 173,
                                  tune_opt = "min",
                                  output = 0,
                                  genplot = TRUE,
                                  keep_editable = FALSE
                                )
```

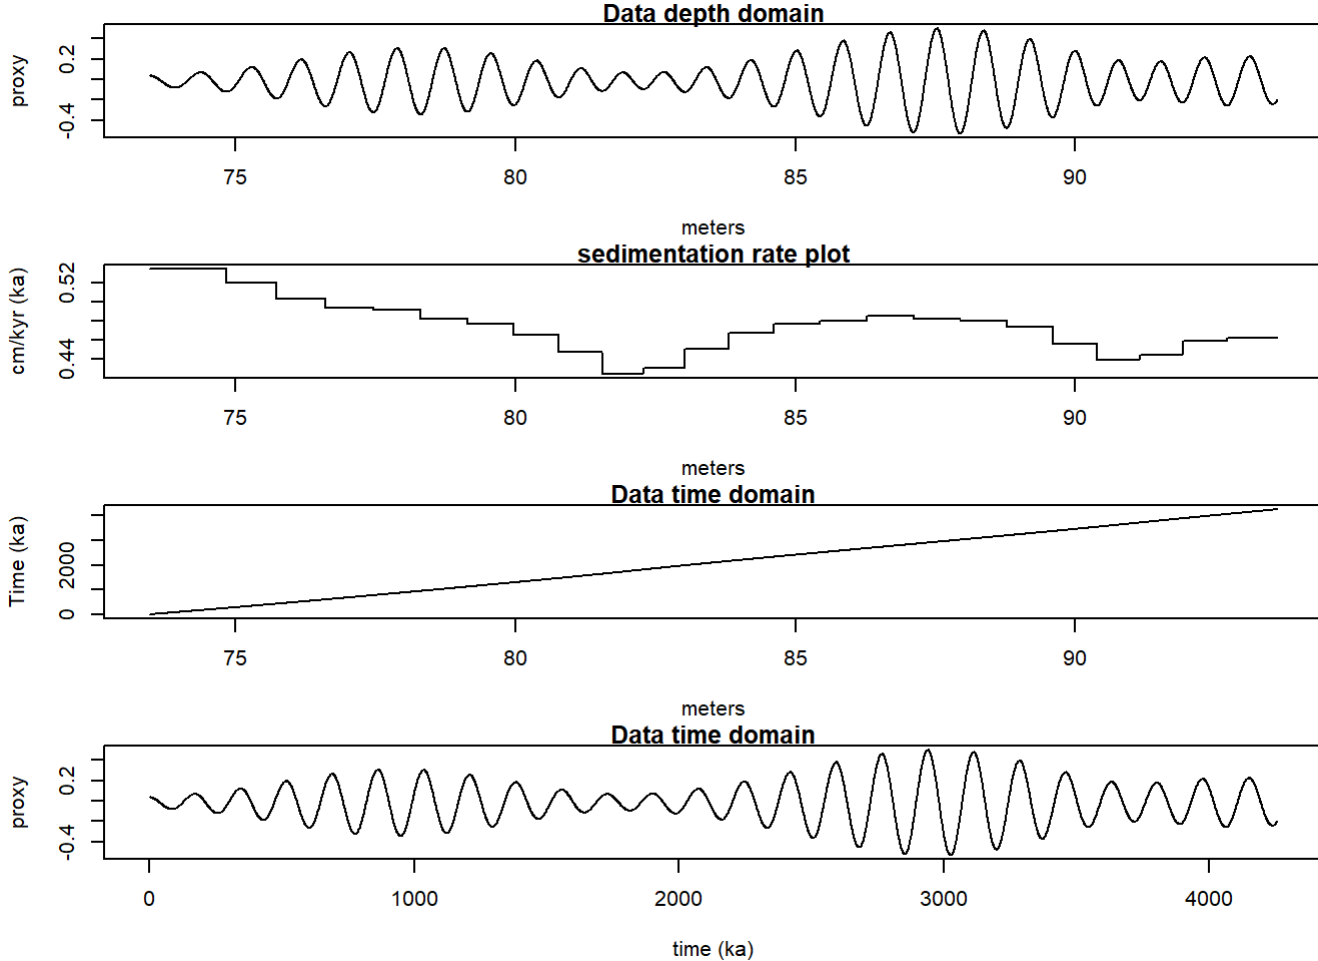

```
colnames(K_173R_min_tun)<-c("K Depth","K","K SR","K time")
```

### 11.1.2.5. Zirconium

```
alb_Zr <- cbind(Alb$DepthAdj,Alb$Zr)
alb_Zr <- na.omit(alb_Zr)
alb_Zr[!is.finite(alb_Zr)] <- NA
alb_Zr <- na.omit(alb_Zr)
alb_Zr <- iso(dat=alb_Zr, xmin=73.453, xmax=93.609)
```

----- ISOLATE STRATIGRAPHIC DATA BY LOCATION -----

- \* Number of data points= 18653
- \* Number of columns= 2
- \* Minimum= 73.453 , Maximum= 93.609
- \* Isolating data between 73.453 and 93.609
- \* Number of data points following culling= 18653

### Stratigraphic Series

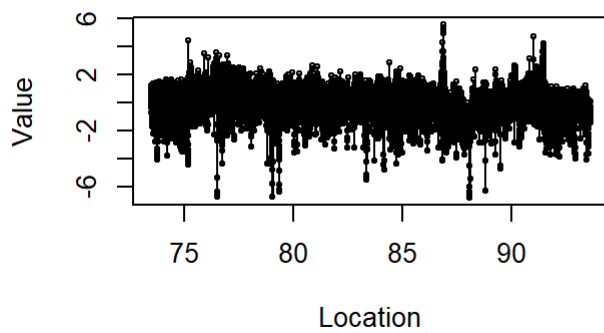

### Distribution of Isolated Values

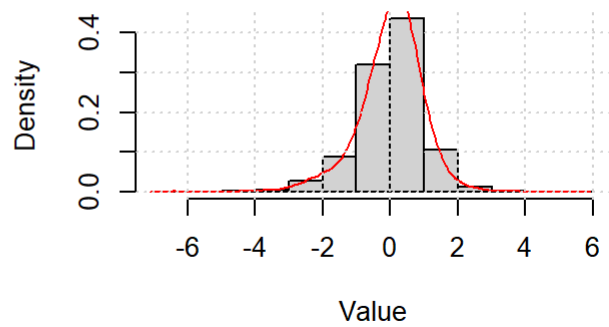

### Boxplot for Isolated Values

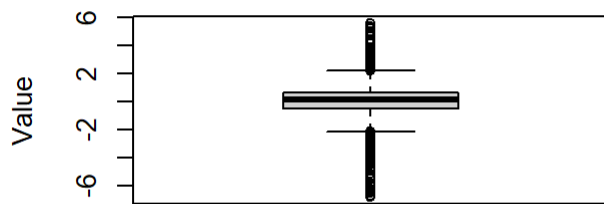

### Normal Q-Q Plot

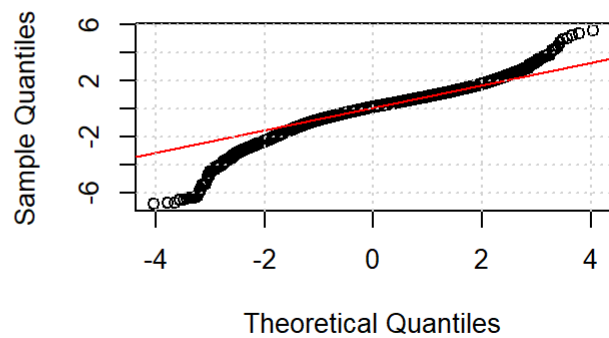

```
alb_Zr <- linterp(alb_Zr, dt=0.005, genplot=T)
```

----- APPLYING PIECEWISE-LINEAR INTERPOLATION TO STRATIGRAPHIC SERIES -----

- \* Number of samples= 18653
- \* New number of samples= 4032

**Raw (black) and Interpolated (red) Data**

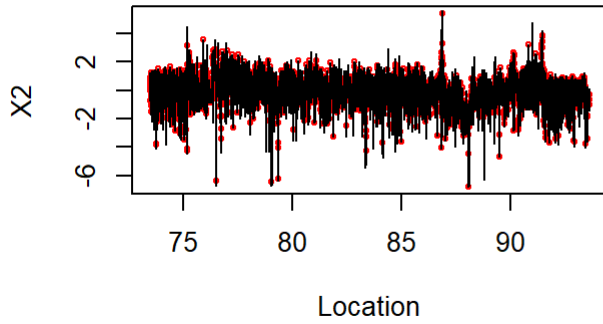

**Distribution of Interpolated Values**

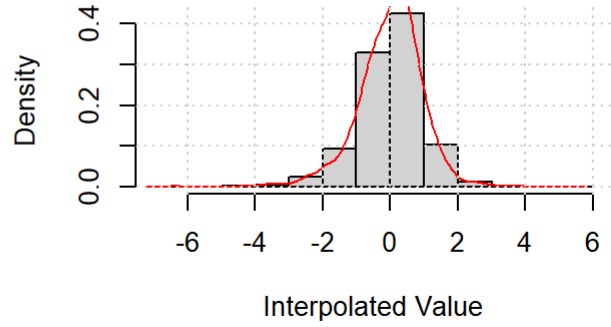

**Boxplot of Interpolated Values**

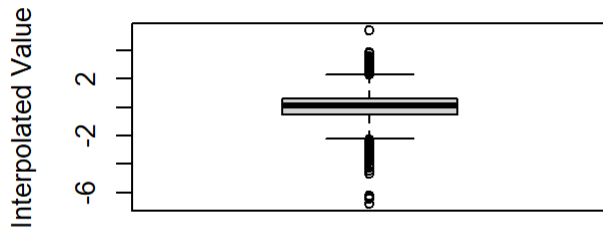

**Normal Q-Q Plot**

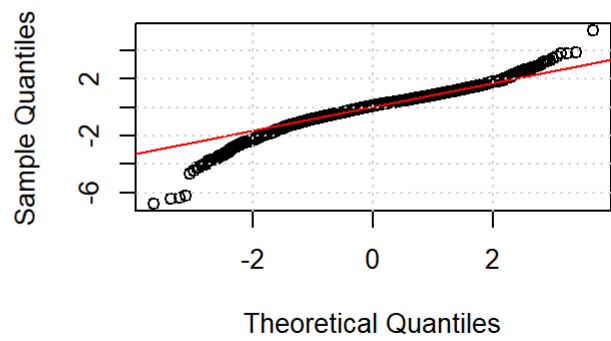

```
Zr_173R <- taner(alb_Zr,xmax=2,fhigh=1/0.97,flow=1/0.75,demean=TRUE)
```

----- TANER BANDPASS FILTERING STRATIGRAPHIC SERIES-----

- \* Number of data points= 4032
- \* Sample interval= 0.005
- \* Mean value removed= -0.004319494



**Stratigraphic Series**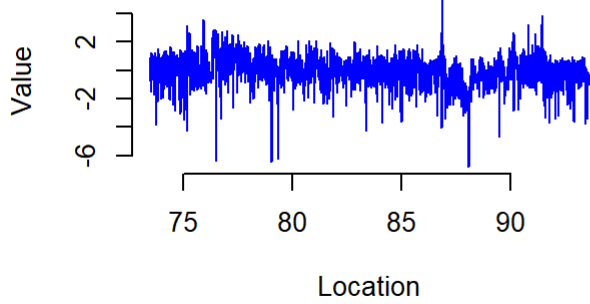**Amplitude**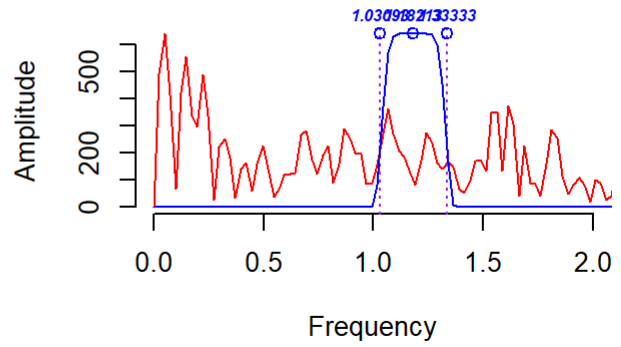**Bandpassed Signal**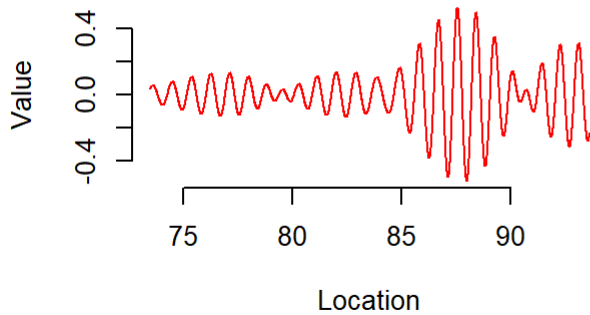**Comparison**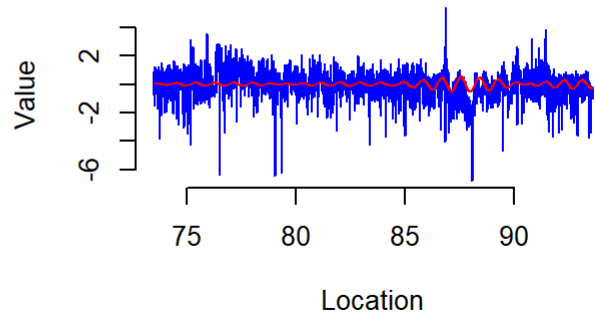

```
Zr_173R_min_tun <- minimal_tuning(data = Zr_173R,pts = 20,cycle = 173,
tune_opt = "min",output = 0,genplot = TRUE,keep_editable = FALSE)
```

**Data depth domain**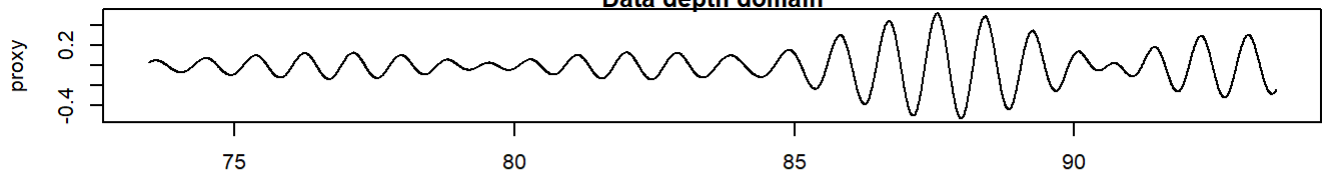**sedimentation rate plot**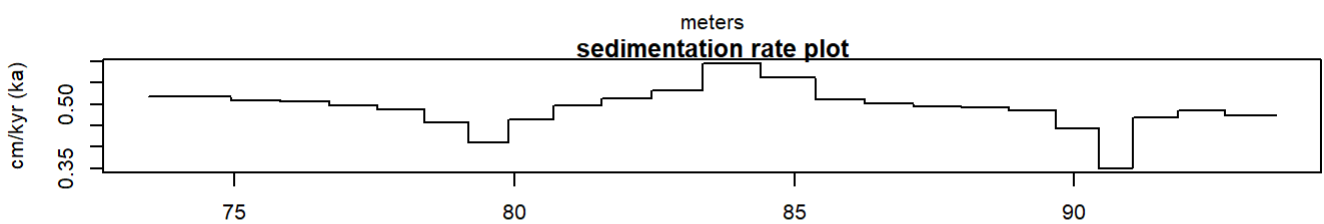**Data time domain**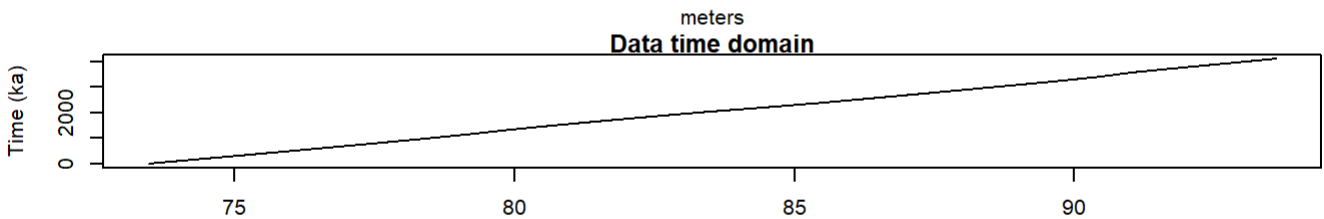**Data time domain**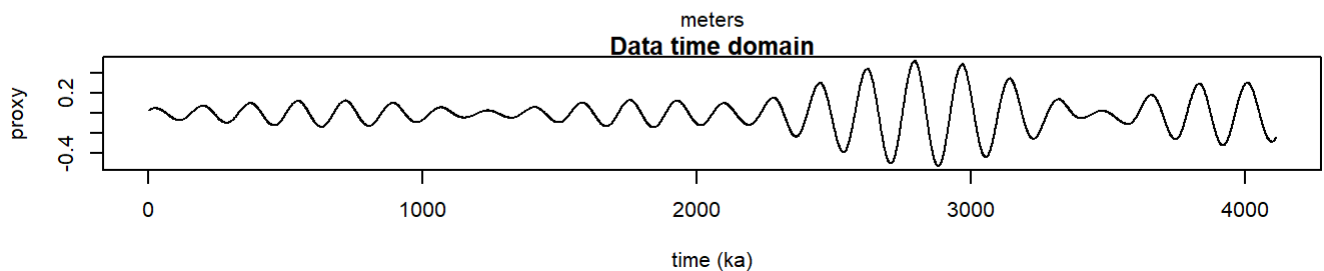

```
colnames(Zr_173R_min_tun)<-c("Zr Depth","Zr","Zr SR","Zr time")
```

### 11.1.3. File containing the filtering of all the detrital element

```
#All detrital
Det_173_min_tun <- cbind(Ti_173R_min_tun,
                          Si_173R_min_tun,
                          Al_173R_min_tun,
                          K_173R_min_tun,
                          Zr_173R_min_tun
                          )

head((Det_173_min_tun))
```

|   | Ti Depth  |             | Ti         | Ti SR     | Ti time   | Si Depth |            | Si        | Si SR |      |
|---|-----------|-------------|------------|-----------|-----------|----------|------------|-----------|-------|------|
| 1 | 73.453    | -0.01918895 | 0.5086705  | 0.0000000 |           | 73.453   | -0.1302751 | 0.4739884 |       |      |
| 2 | 73.458    | -0.01773397 | 0.5086705  | 0.9829545 |           | 73.458   | -0.1289772 | 0.4739884 |       |      |
| 3 | 73.463    | -0.01629626 | 0.5086705  | 1.9659091 |           | 73.463   | -0.1275983 | 0.4739884 |       |      |
| 4 | 73.468    | -0.01487777 | 0.5086705  | 2.9488636 |           | 73.468   | -0.1261400 | 0.4739884 |       |      |
| 5 | 73.473    | -0.01348043 | 0.5086705  | 3.9318182 |           | 73.473   | -0.1246042 | 0.4739884 |       |      |
| 6 | 73.478    | -0.01210616 | 0.5086705  | 4.9147727 |           | 73.478   | -0.1229929 | 0.4739884 |       |      |
|   | Si time   | Al Depth    |            | Al        | Al SR     | Al time  | K Depth    |           | K     | K SR |
| 1 | 0.000000  | 73.453      | -0.1533187 | 0.4797688 | 0.000000  | 73.453   | 0.03580243 | 0.5346821 |       |      |
| 2 | 1.054878  | 73.458      | -0.1524303 | 0.4797688 | 1.042169  | 73.458   | 0.03562798 | 0.5346821 |       |      |
| 3 | 2.109756  | 73.463      | -0.1514751 | 0.4797688 | 2.084337  | 73.463   | 0.03539204 | 0.5346821 |       |      |
| 4 | 3.164634  | 73.468      | -0.1504541 | 0.4797688 | 3.126506  | 73.468   | 0.03509460 | 0.5346821 |       |      |
| 5 | 4.219512  | 73.473      | -0.1493681 | 0.4797688 | 4.168675  | 73.473   | 0.03473567 | 0.5346821 |       |      |
| 6 | 5.274390  | 73.478      | -0.1482183 | 0.4797688 | 5.210843  | 73.478   | 0.03431536 | 0.5346821 |       |      |
|   | K time    | Zr Depth    |            | Zr        | Zr SR     | Zr time  |            |           |       |      |
| 1 | 0.000000  | 73.453      | 0.02894888 | 0.517341  | 0.000000  |          |            |           |       |      |
| 2 | 0.9351351 | 73.458      | 0.03032727 | 0.517341  | 0.9664804 |          |            |           |       |      |
| 3 | 1.8702703 | 73.463      | 0.03166989 | 0.517341  | 1.9329609 |          |            |           |       |      |
| 4 | 2.8054054 | 73.468      | 0.03297492 | 0.517341  | 2.8994413 |          |            |           |       |      |
| 5 | 3.7405405 | 73.473      | 0.03424055 | 0.517341  | 3.8659218 |          |            |           |       |      |
| 6 | 4.6756757 | 73.478      | 0.03546501 | 0.517341  | 4.8324022 |          |            |           |       |      |

### 11.1.4. Sedimentation rate

```
plot(Det_173_min_tun[,1],
     Det_173_min_tun[,3],
     type="l",
     xlab = "Depth adjusted (m)",
     ylab = "Sed rate (cm/kyr)",
     ylim=c(0.38,0.55),
     lwd = 2
     )

lines(Det_173_min_tun[,1],
      Det_173_min_tun[,7],
      col="red",
      lwd=2
      )

lines(Det_173_min_tun[,1],
      Det_173_min_tun[,11],
      col="green",
      lwd=2
      )
```

```

lines(Det_173_min_tun[,1],
      Det_173_min_tun[,15],
      col="blue",
      lwd=2
    )

lines(Det_173_min_tun[,1],
      Det_173_min_tun[,19],
      col="grey",
      lwd=2
    )

lines(Det_173_min_tun[,1],
      Det_173_min_tun[,19]-Det_173_min_tun[,19]+0.493,
      col="red",
      lwd=2,
      lty=3
    )

```

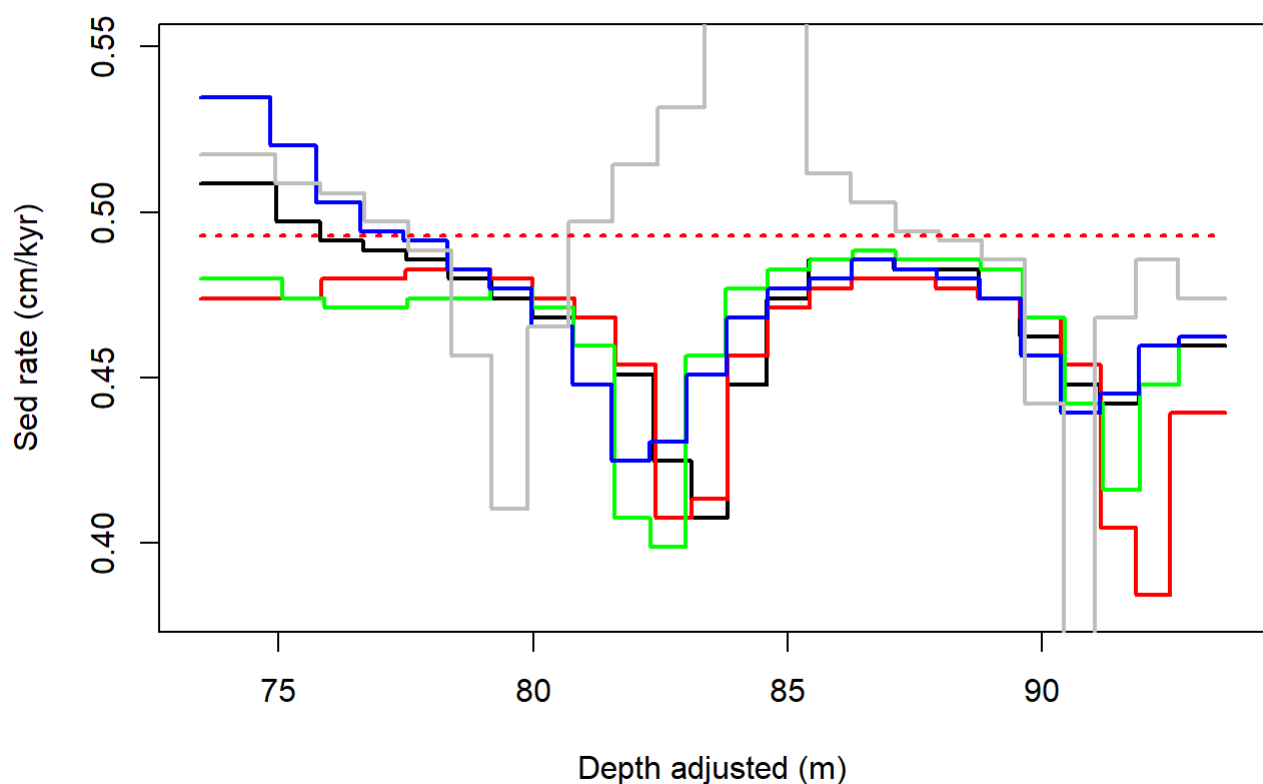

#Zr sedimentation rate is significantly different compared to the other detrital  
#element and will not be used.

```

plot(Det_173_min_tun[,1],
      Det_173_min_tun[,3],
      type="l",
      xlab = "Depth adjusted (m)",
      ylab = "Sed rate (cm/kyr)",
      ylim=c(0.38,0.55),
      lwd = 2
    )

```

```

lines(Det_173_min_tun[,1],
      Det_173_min_tun[,7],
      col="red",
      lwd=2
    )

lines(Det_173_min_tun[,1],
      Det_173_min_tun[,11],
      col="green",
      lwd=2
    )

lines(Det_173_min_tun[,1],
      Det_173_min_tun[,15],
      col="blue",
      lwd=2
    )

lines(Det_173_min_tun[,1],
      Det_173_min_tun[,19]-Det_173_min_tun[,19]+0.493,
      col="red",
      lwd=2,
      lty=3
    )

legend("bottomleft",
      legend = c("Ti (0.75-0.97 m filter)",
                  "Si (0.75-0.97 m filter)",
                  "Al (0.75-0.97 m filter)",
                  "K (0.75-0.97 m filter)",
                  "ASM = 0.493 cm/kyr (theoretical)"),
      col = c("black", "red", "green", "blue", "red"),
      lty = c(1, 1, 1, 1,3),
      lwd = c(2, 2, 2, 2,2),
      pch = c(NA, NA, NA, NA,NA),
      pt.cex = 2,
      bty = "n",          # No box around legend
      cex = 0.7)

```

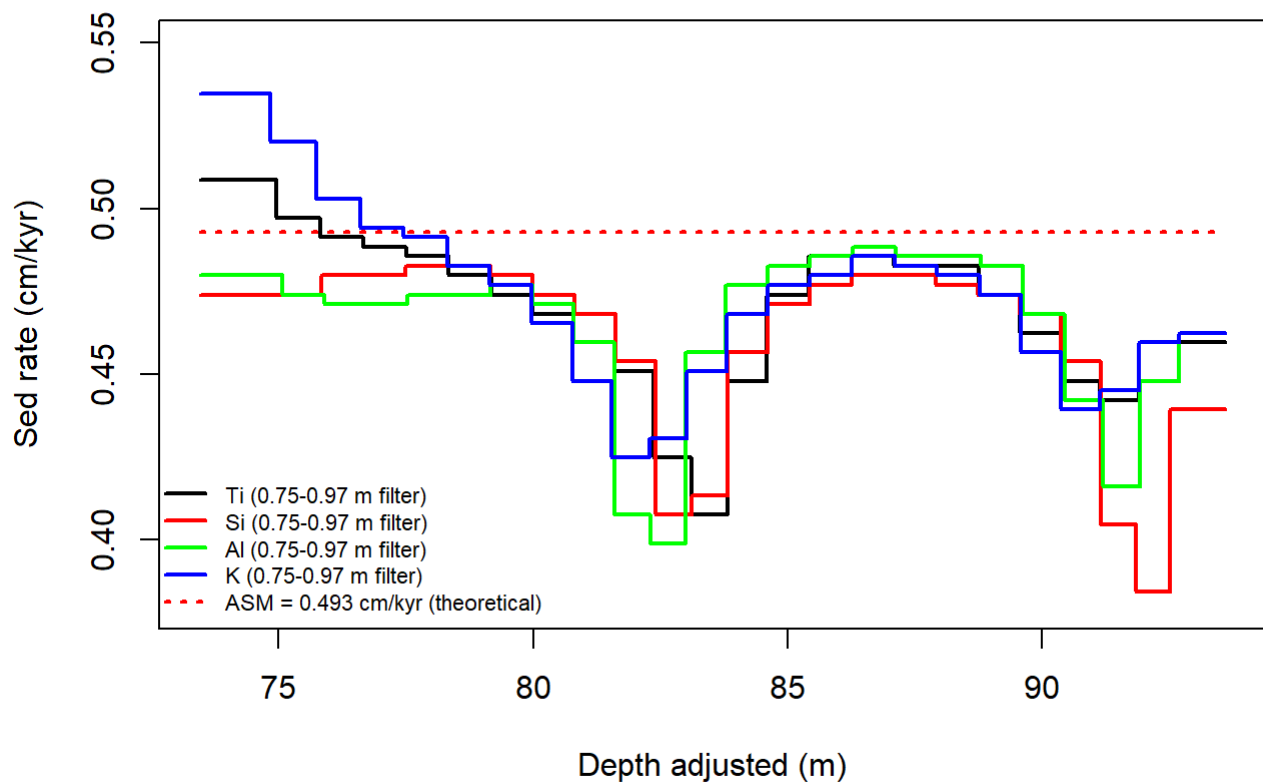

### 11.1.5. Mean and standard deviation calculation

```
#Smoothing the sed rate and turning it into frequency to calculate the mean and the
#standard deviation of the age model
Ti_173_freq<-noLow(cbind(Det_173_min_tun[,c(1)],1/(Det_173_min_tun[,c(3)]*173)),
  0.05,
  output = 2
)
```

----- REMOVING LOWESS SMOOTHER FROM STRATIGRAPHIC SERIES -----

Call:

```
loess(formula = (dat[, 2]) ~ dat[, 1], span = smooth, degree = 1)
```

Number of Observations: 4032

Equivalent Number of Parameters: 31.09

Residual Standard Error: 9.956e-05

Trace of smoother matrix: 36.89 (exact)

Control settings:

```
span      : 0.05
degree    : 1
family    : gaussian
surface   : interpolate    cell = 0.2
normalize : TRUE
parametric: FALSE
drop.square: FALSE
```

**Data with LOWESS Fit**

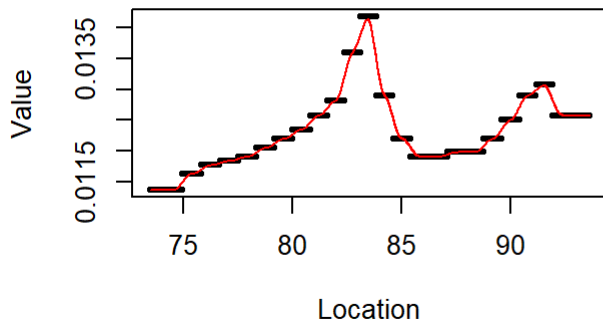

**Residuals from LOWESS Fit**

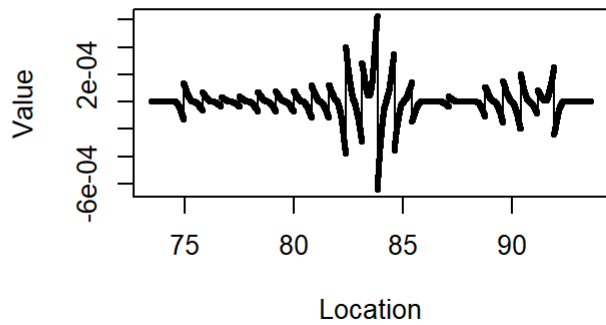

**Distribution of Residual Values**

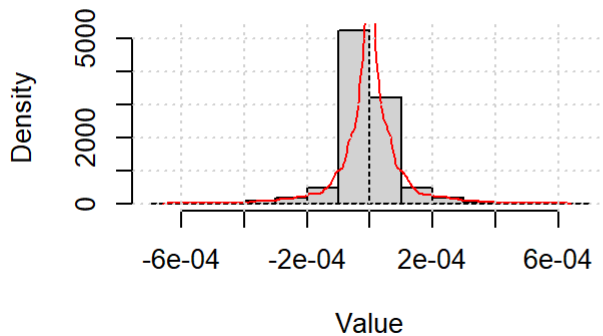

**Boxplot of Residual Values**

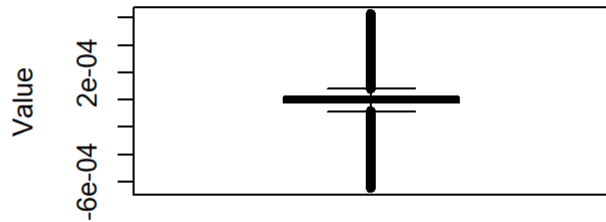

```
Si_173_freq<-noLow(cbind(Det_173_min_tun[,c(1)],1/(Det_173_min_tun[,c(7)]*173)),
  0.05,
  output = 2
)
```

----- REMOVING LOWESS SMOOTHER FROM STRATIGRAPHIC SERIES -----

Call:

```
loess(formula = (dat[, 2]) ~ dat[, 1], span = smooth, degree = 1)
```

Number of Observations: 4032

Equivalent Number of Parameters: 31.09

Residual Standard Error: 0.0001639

Trace of smoother matrix: 36.89 (exact)

Control settings:

```
span      : 0.05
degree    : 1
family    : gaussian
surface   : interpolate    cell = 0.2
normalize : TRUE
parametric: FALSE
drop.square: FALSE
```

**Data with LOWESS Fit**

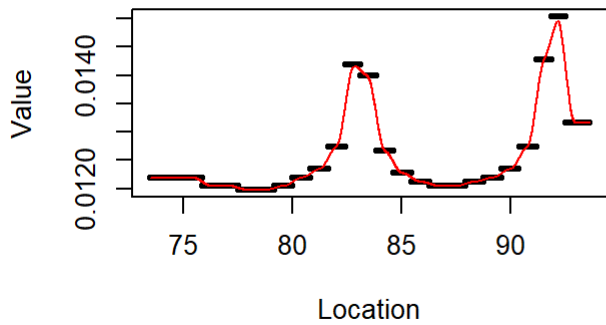

**Residuals from LOWESS Fit**

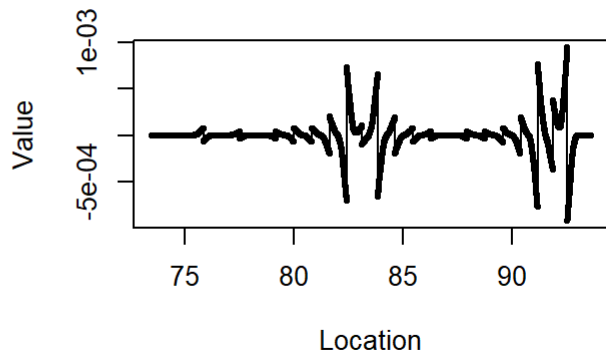

**Distribution of Residual Values**

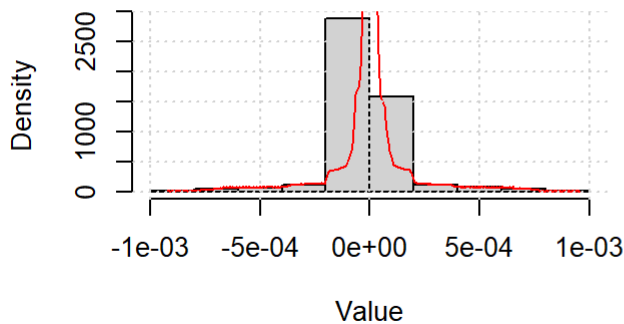

**Boxplot of Residual Values**

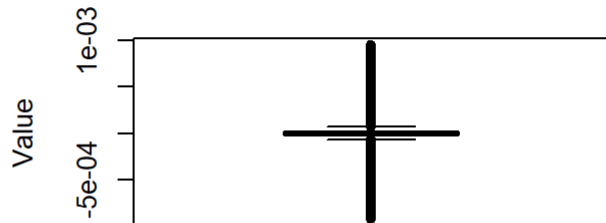

```
AI_173_freq<-noLow(cbind(Det_173_min_tun[,c(1)],1/(Det_173_min_tun[,c(11)]*173)),
  0.05,
  output = 2
)
```

----- REMOVING LOWESS SMOOTHER FROM STRATIGRAPHIC SERIES -----

Call:

```
loess(formula = (dat[, 2]) ~ dat[, 1], span = smooth, degree = 1)
```

Number of Observations: 4032

Equivalent Number of Parameters: 31.09

Residual Standard Error: 0.0001489

Trace of smoother matrix: 36.89 (exact)

Control settings:

```
span      : 0.05
degree    : 1
family    : gaussian
surface   : interpolate    cell = 0.2
normalize : TRUE
parametric: FALSE
drop.square: FALSE
```

**Data with LOWESS Fit**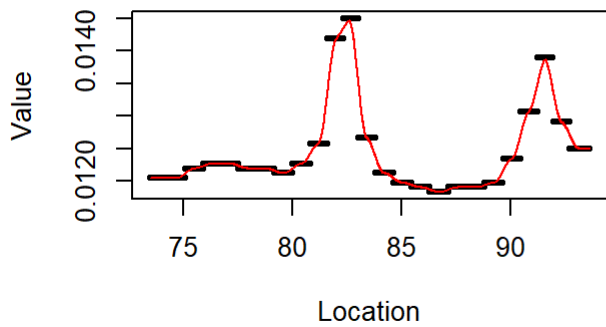**Residuals from LOWESS Fit**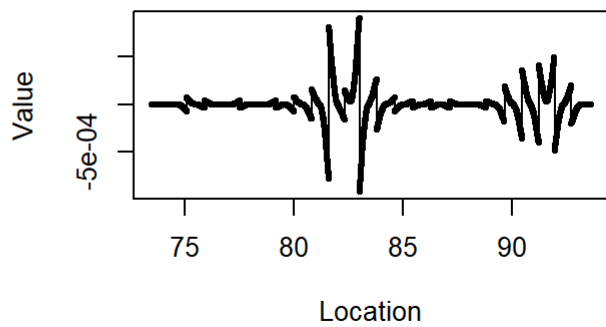**Distribution of Residual Values**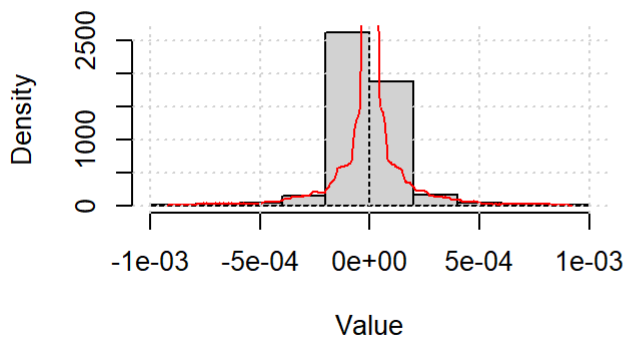**Boxplot of Residual Values**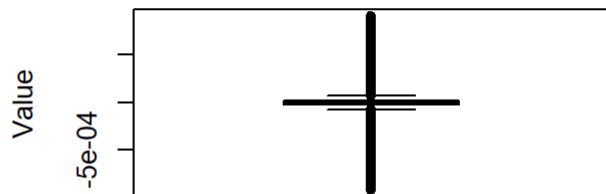

```
K_173_freq<-noLow(cbind(Det_173_min_tun[,c(1)],1/(Det_173_min_tun[,c(15)]*173)),
  0.05,
  output = 2
)
```

----- REMOVING LOWESS SMOOTHER FROM STRATIGRAPHIC SERIES -----

Call:

```
loess(formula = (dat[, 2]) ~ dat[, 1], span = smooth, degree = 1)
```

Number of Observations: 4032

Equivalent Number of Parameters: 31.09

Residual Standard Error: 7.944e-05

Trace of smoother matrix: 36.89 (exact)

Control settings:

```
span      : 0.05
degree    : 1
family    : gaussian
surface   : interpolate    cell = 0.2
normalize : TRUE
parametric: FALSE
drop.square: FALSE
```



### Residuals from LOWESS Fit

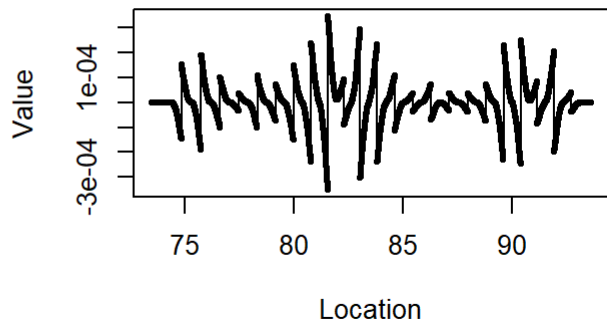

### Boxplot of Residual Values

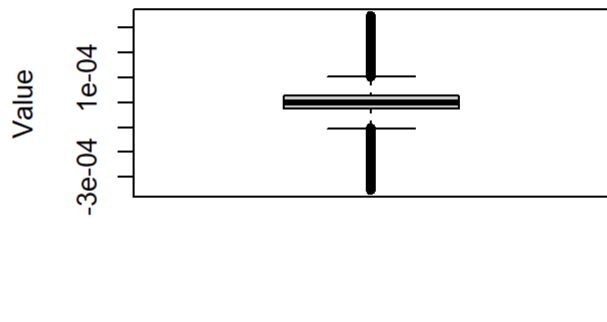

```
head(Det_173_freq)
```

[illegible]

```

plot(Det_173_freq[,1],
     1/(Det_173_freq[,2]),
     type="l",
     col="black",
     lwd= 2,
     xlab = "Depth adjusted (m)",
     ylab = "Period (cm)",
     ylim = c(65,95)
)

lines(Det_173_freq[,1],
      1/(Det_173_freq[,3]),
      col="red",
      lwd=2
)

lines(Det_173_freq[,1],
      1/(Det_173_freq[,4]),
      col="green",
      lwd=2
)

lines(Det_173_freq[,1],
      1/(Det_173_freq[,5]),
      col="blue",
      lwd=2
)

#Graphical visualisation of the uncertainties
depth<-Det_173_freq[,1]
curve_mean <- Det_173_freq[,6]
curve_sd <- Det_173_freq[,7]

# Add polygon for mean  $\pm$  SD
polygon(c(depth, rev(depth)),
       1/c(curve_mean + curve_sd, rev(curve_mean - curve_sd)),
       col = rgb(0.7, 0.7, 0.7, 0.4), border = NA)

# Optionally overlay mean line
lines(depth, 1/curve_mean, col = "yellow", lwd = 2)
legend("bottomleft",
      legend = c("Ti", "Si", "K", "Al", "Mean", "Mean  $\pm$  SD"),
      col = c("black", "red", "blue", "green", "yellow", rgb(0.7, 0.7, 0.7, 0.8)),
      lty = c(1, 1, 1, 1, 1, NA),
      lwd = c(1, 1, 1, 1, 1, NA),
      pch = c(NA, NA, NA, NA, NA, 15),
      pt.cex = 2,
      bty = "n",          # No box around legend
      cex = 1)           # Larger legend text

```

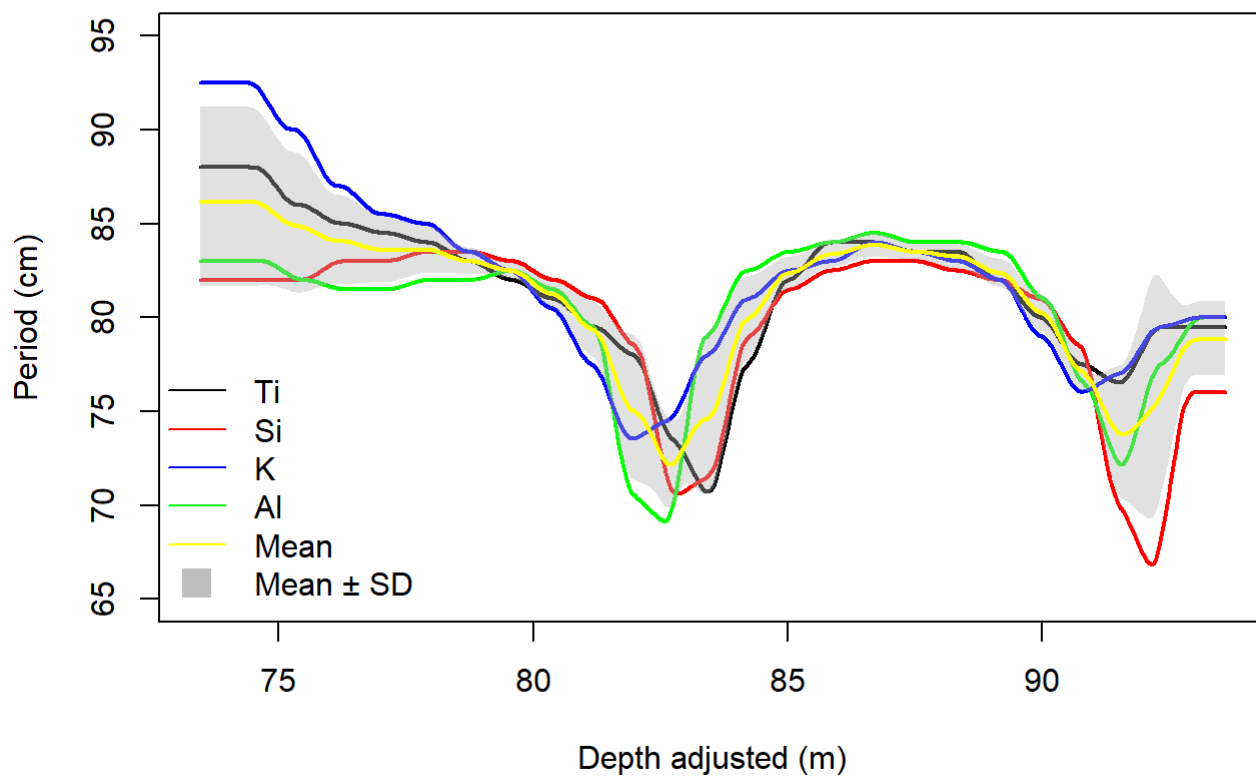

### 11.1.6. Building of the Age model

```
#Calculating the minimal, mean and maximal sed rates
mean_sed<-freq2sedrate(cbind(Det_173_freq[,1],
                             (Det_173_freq[,6])),
                      period=17300
                      )
```

----- CONVERTING RECORD OF SPATIAL FREQUENCY TO SEDIMENTATION RATE CURVE-----

- \* Sorting into increasing depth/height order.  
Will remove empty entries.
- \* Number of control points = 4032

### Local Frequency

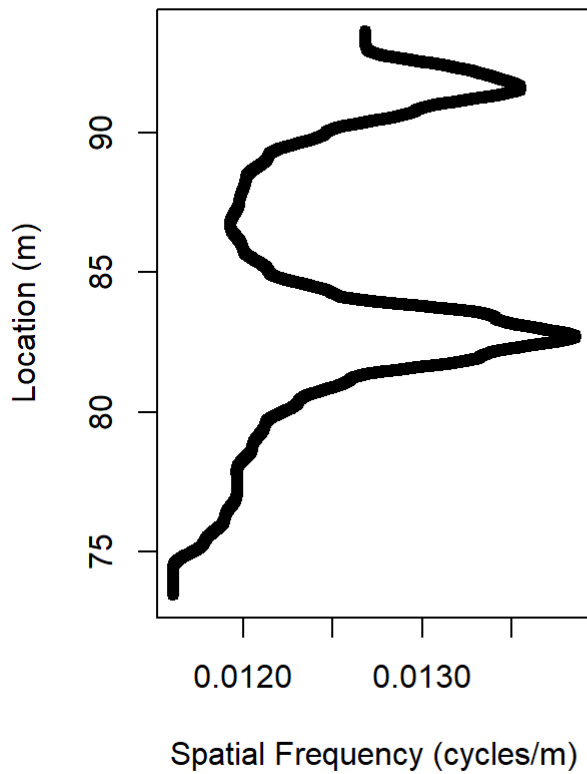

### Sedimentation Rate

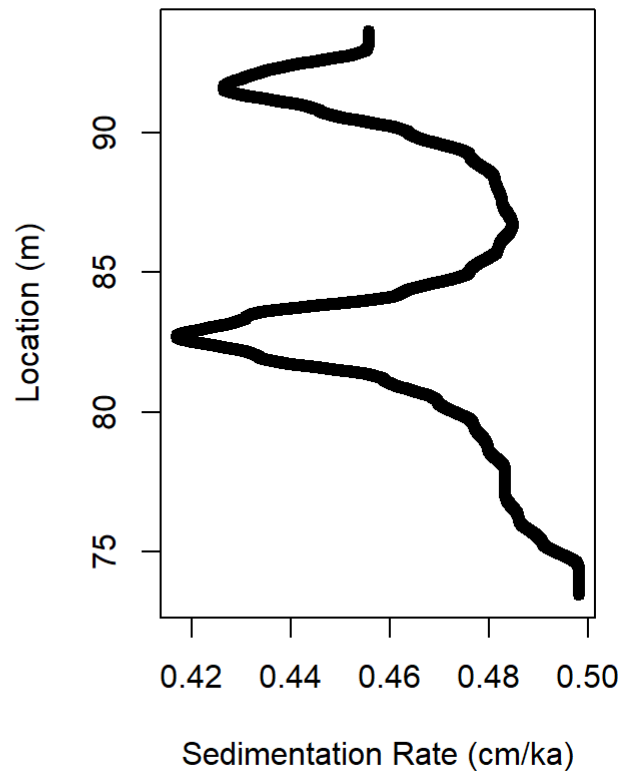

```
max_sed<-freq2sedrate(cbind(Det_173_freq[,1],
                             (Det_173_freq[,6]+2*Det_173_freq[,7])),
                      period=17300
                      )
```

----- CONVERTING RECORD OF SPATIAL FREQUENCY TO SEDIMENTATION RATE CURVE-----

- \* Sorting into increasing depth/height order.  
Will remove empty entries.
- \* Number of control points = 4032

### Local Frequency

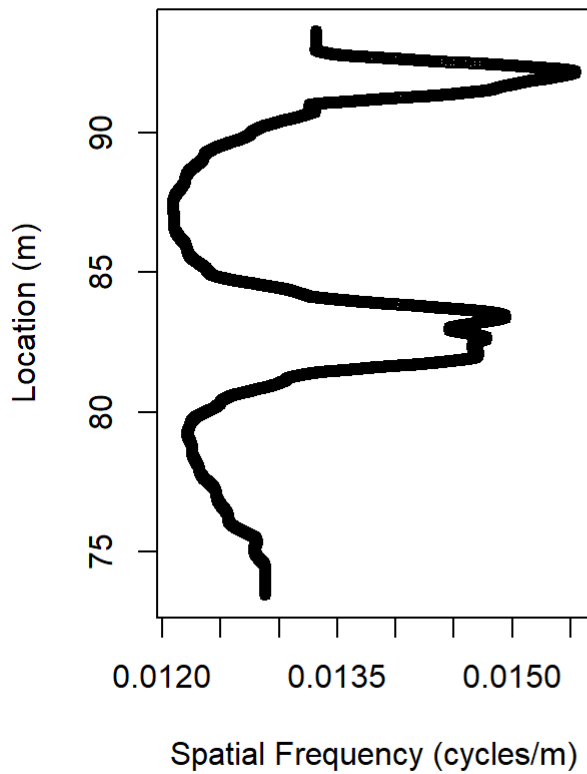

### Sedimentation Rate

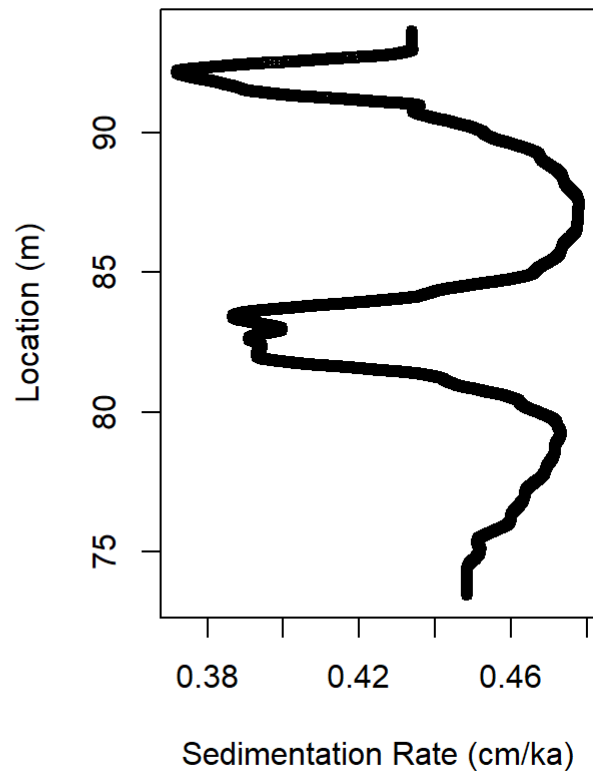

```
min_sed<-freq2sedrate(cbind(Det_173_freq[,1],  
                             (Det_173_freq[,6]-2*Det_173_freq[,7])),  
                      period=17300  
                      )
```

----- CONVERTING RECORD OF SPATIAL FREQUENCY TO SEDIMENTATION RATE CURVE-----

- \* Sorting into increasing depth/height order.  
Will remove empty entries.
- \* Number of control points = 4032

### Local Frequency

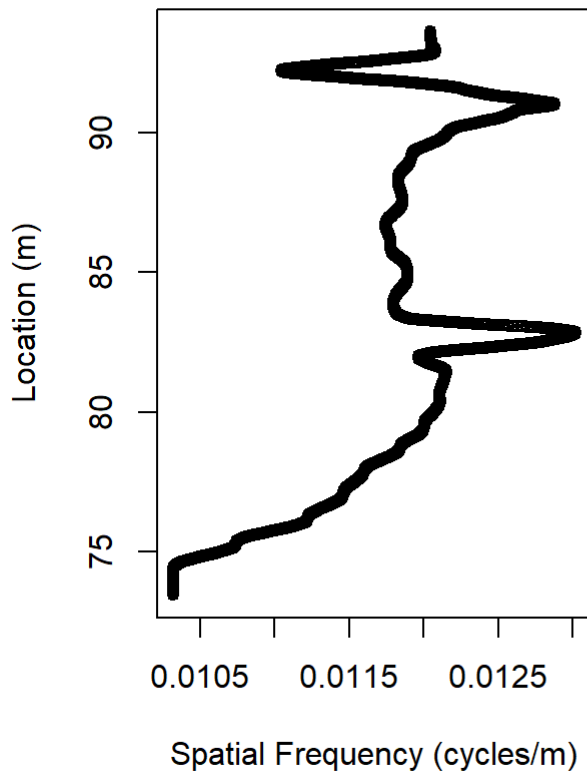

### Sedimentation Rate

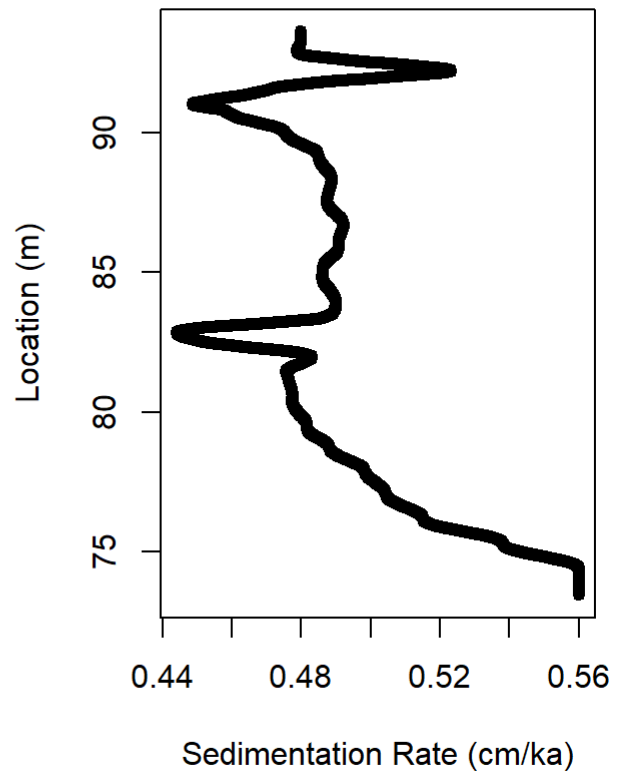

```
#Sed rate to time and creation fo the Age Model
Mean_AgeModel<-sedrate2time(mean_sed)
```

----- INTEGRATING SEDIMENTATION RATE CURVE-----

- \* Sorting sedrates into increasing depth/height order.  
Will remove empty entries.
- \* Number of sedimentation rates= 4032

## Time-Space Map

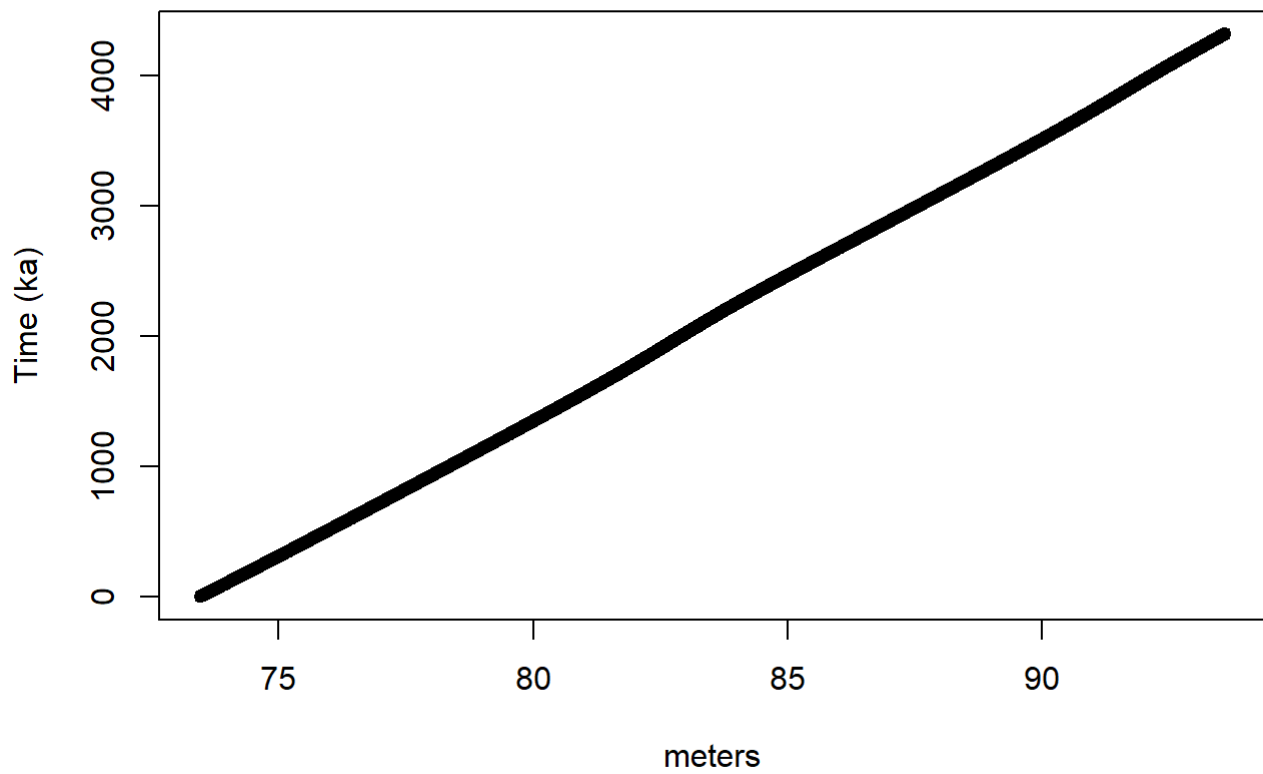

```
Max_AgeModel<-sedrate2time(max_sed)
```

----- INTEGRATING SEDIMENTATION RATE CURVE-----

- \* Sorting sedrates into increasing depth/height order.  
Will remove empty entries.
- \* Number of sedimentation rates= 4032

## Time-Space Map

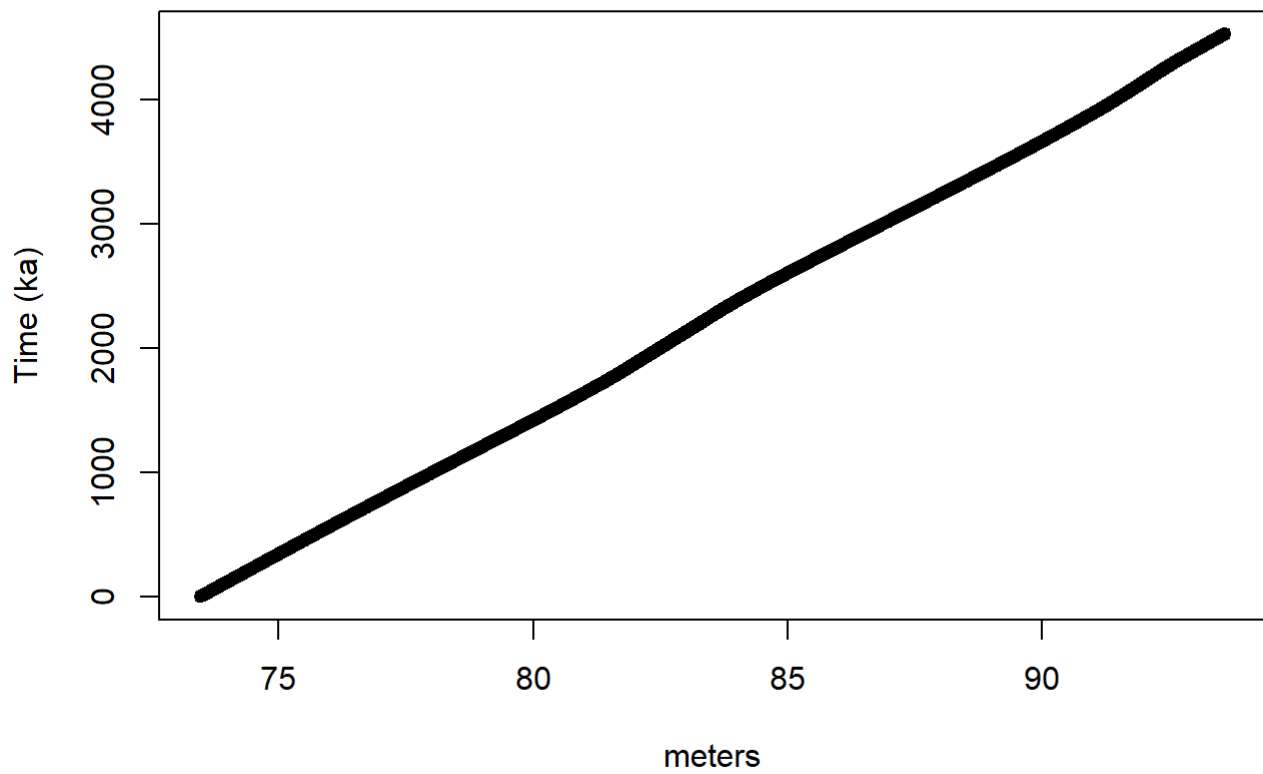

```
Min_AgeModel<-sedrate2time(min_sed)
```

----- INTEGRATING SEDIMENTATION RATE CURVE-----

- \* Sorting sedrates into increasing depth/height order.  
Will remove empty entries.
- \* Number of sedimentation rates= 4032



## Time-Space Map

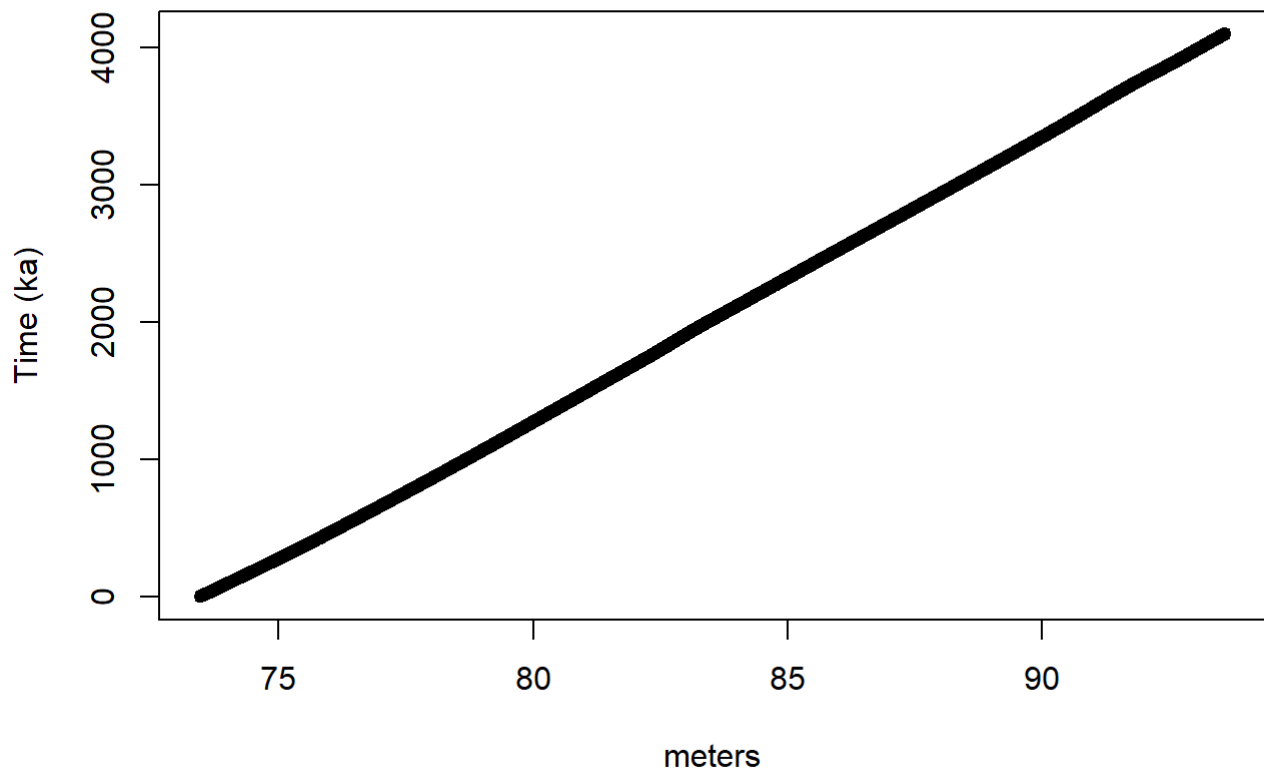

```
plot(Mean_AgeModel,type="l", lwd=2)
lines(Max_AgeModel,col="green",lwd=2)
lines(Min_AgeModel,col="blue",lwd=2)
```

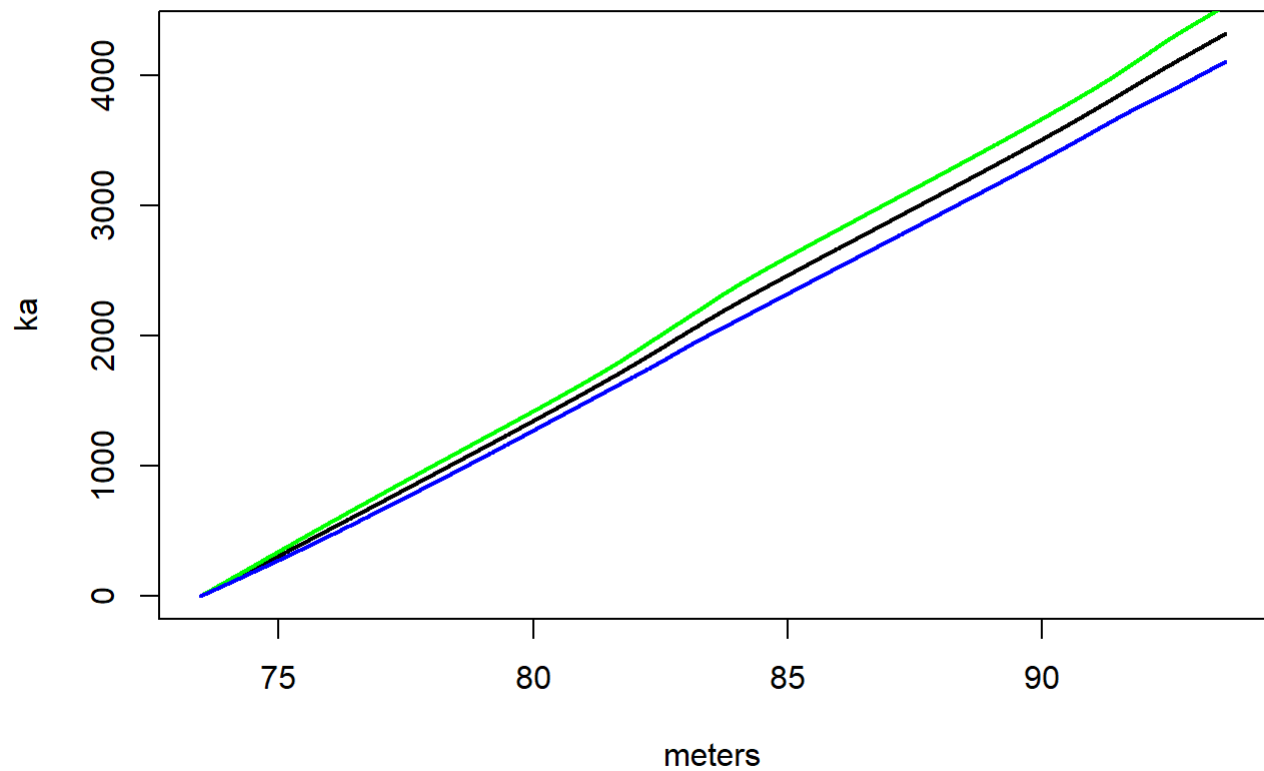

```
Age_Model <- cbind(Mean_AgeModel,Max_AgeModel[,2],Min_AgeModel[,2])
colnames(Age_Model)<- cbind("Adjusted depth (m)",
                             "Mean age (ka)",
                             "Max age (ka)",
                             "Min age (ka)"
                             )

#Interpolation of the Age-Model every 1 mm to have an age-depth correlation for
#the entire Ti dataset with the original sampling step of 1mm
Mean_Age_Model_1mm <- linterp(Mean_AgeModel, dt=0.001, genplot=T)
```

----- APPLYING PIECEWISE-LINEAR INTERPOLATION TO STRATIGRAPHIC SERIES -----

\* Number of samples= 4032  
 \* New number of samples= 20155

**Raw (black) and Interpolated (red) Data**

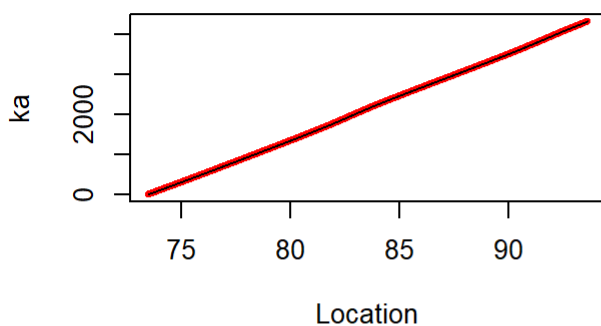

**Distribution of Interpolated Values**

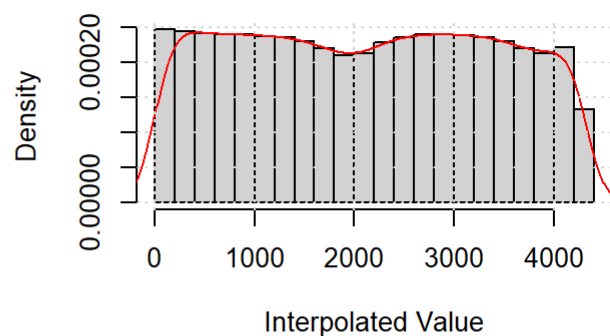

**Boxplot of Interpolated Values**

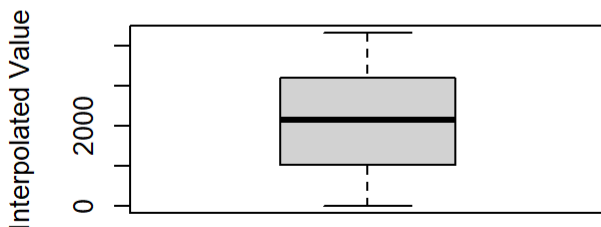

**Normal Q-Q Plot**

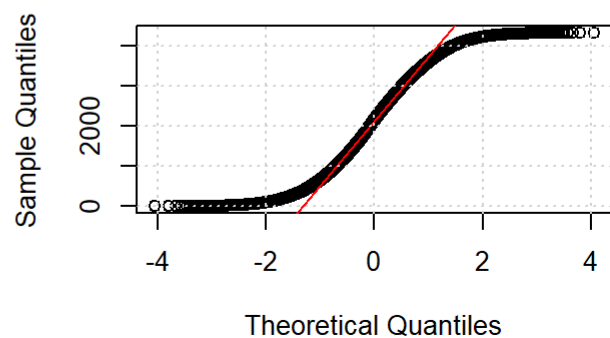

```
Max_Age_Model_1mm <- linterp(Max_AgeModel, dt=0.001, genplot=T)
```

----- APPLYING PIECEWISE-LINEAR INTERPOLATION TO STRATIGRAPHIC SERIES -----

\* Number of samples= 4032  
 \* New number of samples= 20155

**Raw (black) and Interpolated (red) Data**

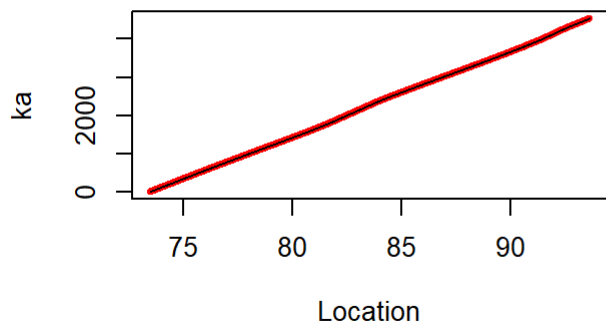

**Distribution of Interpolated Values**

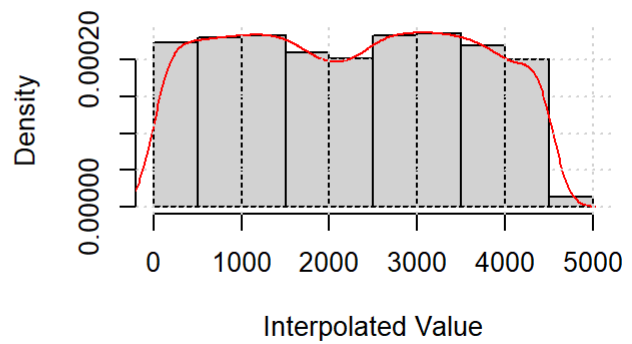

**Boxplot of Interpolated Values**

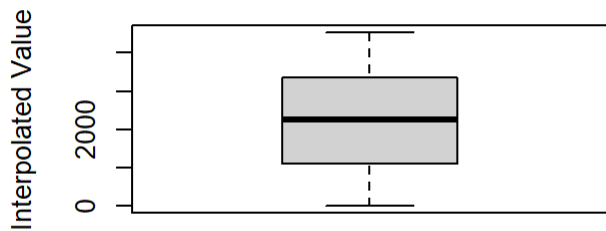

**Normal Q-Q Plot**

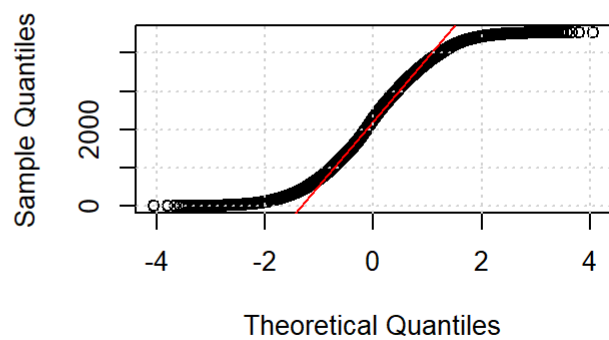

```
Min_Age_Model_1mm <- linterp(Min_AgeModel, dt=0.001, genplot=T)
```

----- APPLYING PIECEWISE-LINEAR INTERPOLATION TO STRATIGRAPHIC SERIES -----

- \* Number of samples= 4032
- \* New number of samples= 20155

**Raw (black) and Interpolated (red) Data**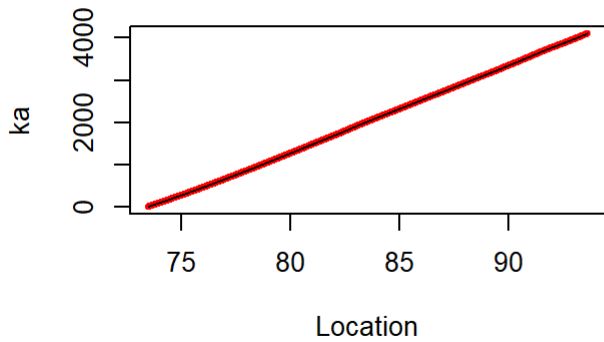**Distribution of Interpolated Values**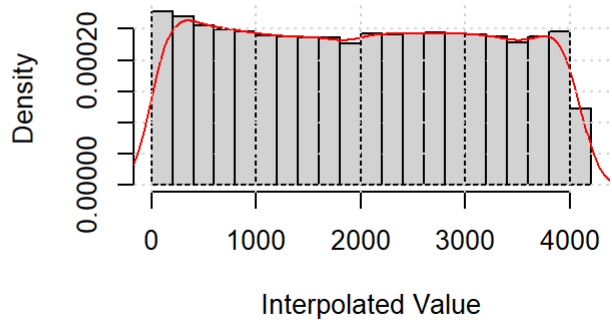**Boxplot of Interpolated Values**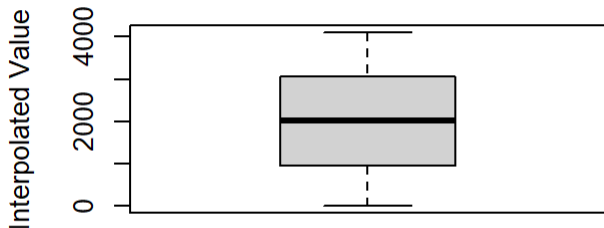**Normal Q-Q Plot**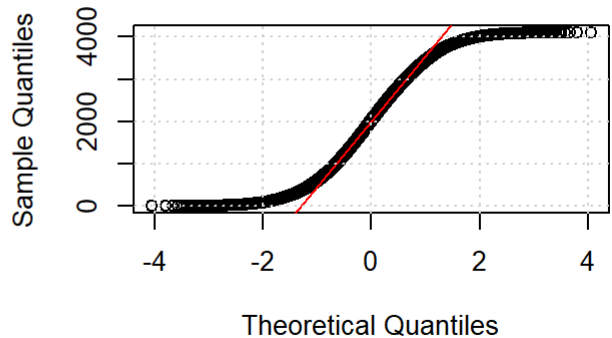

```
Age_Model_1mm <- cbind(Mean_Age_Model_1mm,Max_Age_Model_1mm[,2],Min_Age_Model_1mm[,2])
colnames(Age_Model)<- cbind("Adjusted depth (m)",
                             "Mean age (ka)",
                             "Max age (ka)",
                             "Min age (ka)"
                             )

#Saving of the age models as .csv files
# write.csv(Age_Model,"AgeModel_rsp5mm_filter0.75-0.97m.csv")
# write.csv(Age_Model_1mm,"AgeModel_rsp1mm_filter0.75-0.97m.csv")
```

## 11.2. Age-Depth model (Wavelet tracking; preferred)

### 11.2.1. Tracking of the 173 kyr for Ti, Al, Si and K

As shown in the time series analysis (MTM, EHA and CWT), the 173 kyr cycle is comprised between 0.75 and 0.9 m. To avoid overpass this range when tracking the Wavelet, especially with periodicities lower than 0.74 m, that could be linked to the short eccentricity (100-135 kyr) band, we used a lowpass filtering of the tracked Wavelet in accordance with the general trend observed in the CWT.

#### 11.2.1.1. Titanium

```
alb_Ti <- cbind(Alb$DepthAdj,Alb$Ti)
alb_Ti <- na.omit(alb_Ti)
alb_Ti[!is.finite(alb_Ti)] <- NA
alb_Ti <- na.omit(alb_Ti)
alb_Ti <- iso(dat=alb_Ti, xmin=73.453, xmax=100)
```

----- ISOLATE STRATIGRAPHIC DATA BY LOCATION -----

- \* Number of data points= 30577
- \* Number of columns= 2
- \* Minimum= 62.111 , Maximum= 93.61
- \* Isolating data between 73.453 and 100
- \* Number of data points following culling= 19311

**Stratigraphic Series**

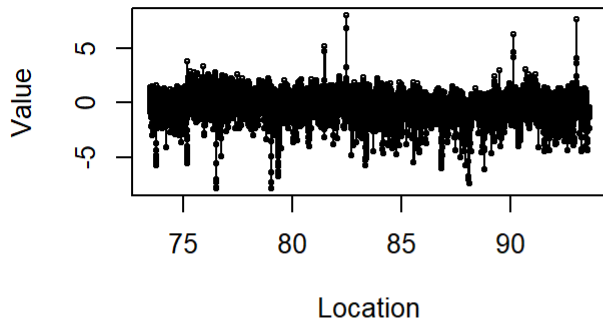

**Distribution of Isolated Values**

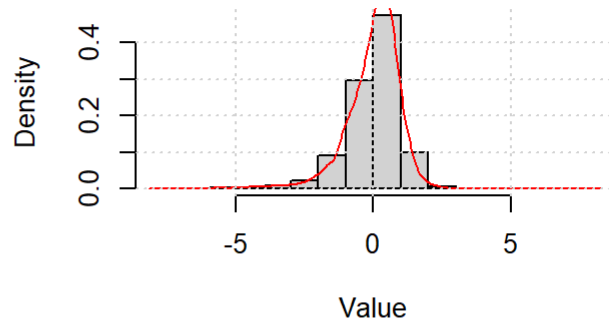

**Boxplot for Isolated Values**

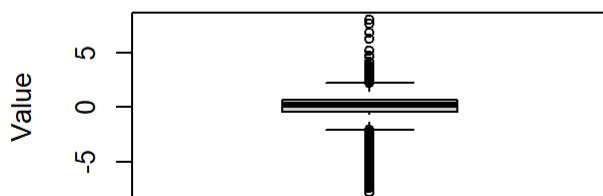

**Normal Q-Q Plot**

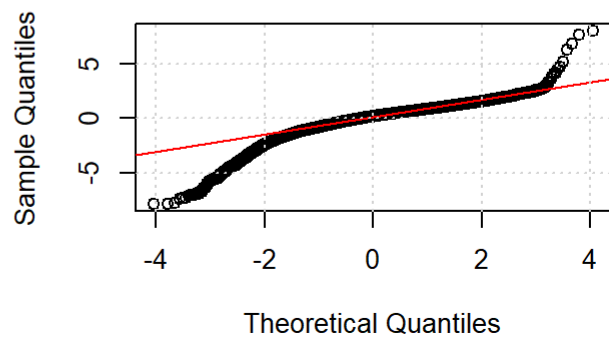

```
alb_Ti_ndet <- linterp(alb_Ti, dt=0.005, genplot=T)
```

----- APPLYING PIECEWISE-LINEAR INTERPOLATION TO STRATIGRAPHIC SERIES -----

- \* Number of samples= 19311
- \* New number of samples= 4032

**Raw (black) and Interpolated (red) Data**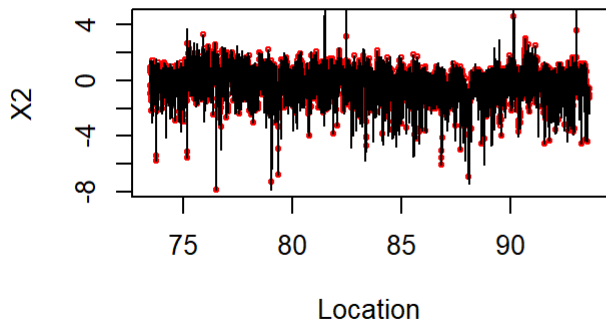**Distribution of Interpolated Values**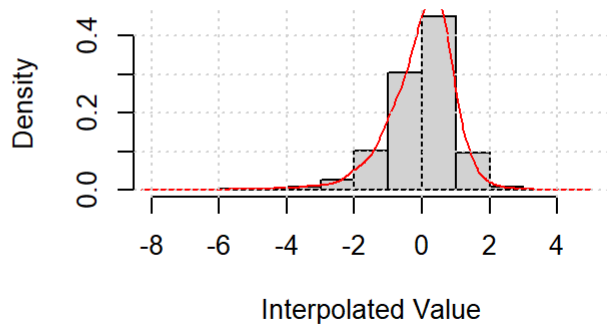**Boxplot of Interpolated Values**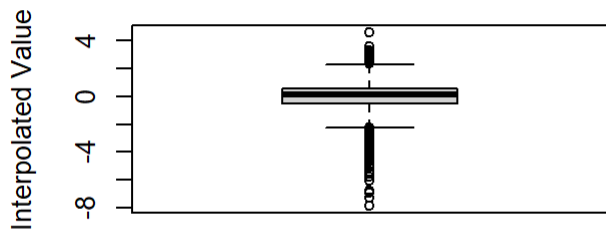**Normal Q-Q Plot**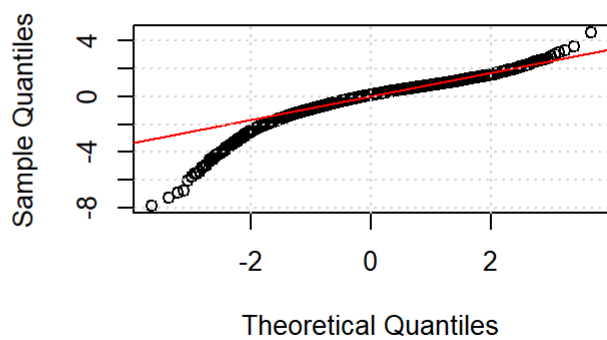

```
#Waverider
alb_Ti_wt <- analyze_wavelet(alb_Ti_ndet,
                             dj = 1/100,
                             lowerPeriod = 0.5,
                             upperPeriod = 5,
                             verbose = FALSE,
                             omega_nr = 10
                             )

plot_wavelet(wavelet = alb_Ti_wt,
             lowerPeriod = NULL,
             upperPeriod = NULL,
             n.levels = 100,
             palette_name = "rainbow",
             color_brewer = "grDevices",
             useRaster = TRUE,
             periodlab = "Period (metres)",
             x_lab = "Depth (metres)",
             keep_editable = FALSE,
             dev_new = F,
             add_lines = NULL,
             add_points = NULL,
             add_abline_h = NULL,
             add_abline_v = NULL,
             add_MTM_peaks = FALSE,
             add_data = TRUE,
             add_avg = TRUE,
             add_MTM = FALSE,
             demean_mtm = TRUE,
             detrend_mtm = TRUE,
             padfac_mtm = 5,
```

```

    tbw_mtm = 3,
    plot_horizontal = TRUE
  )

```

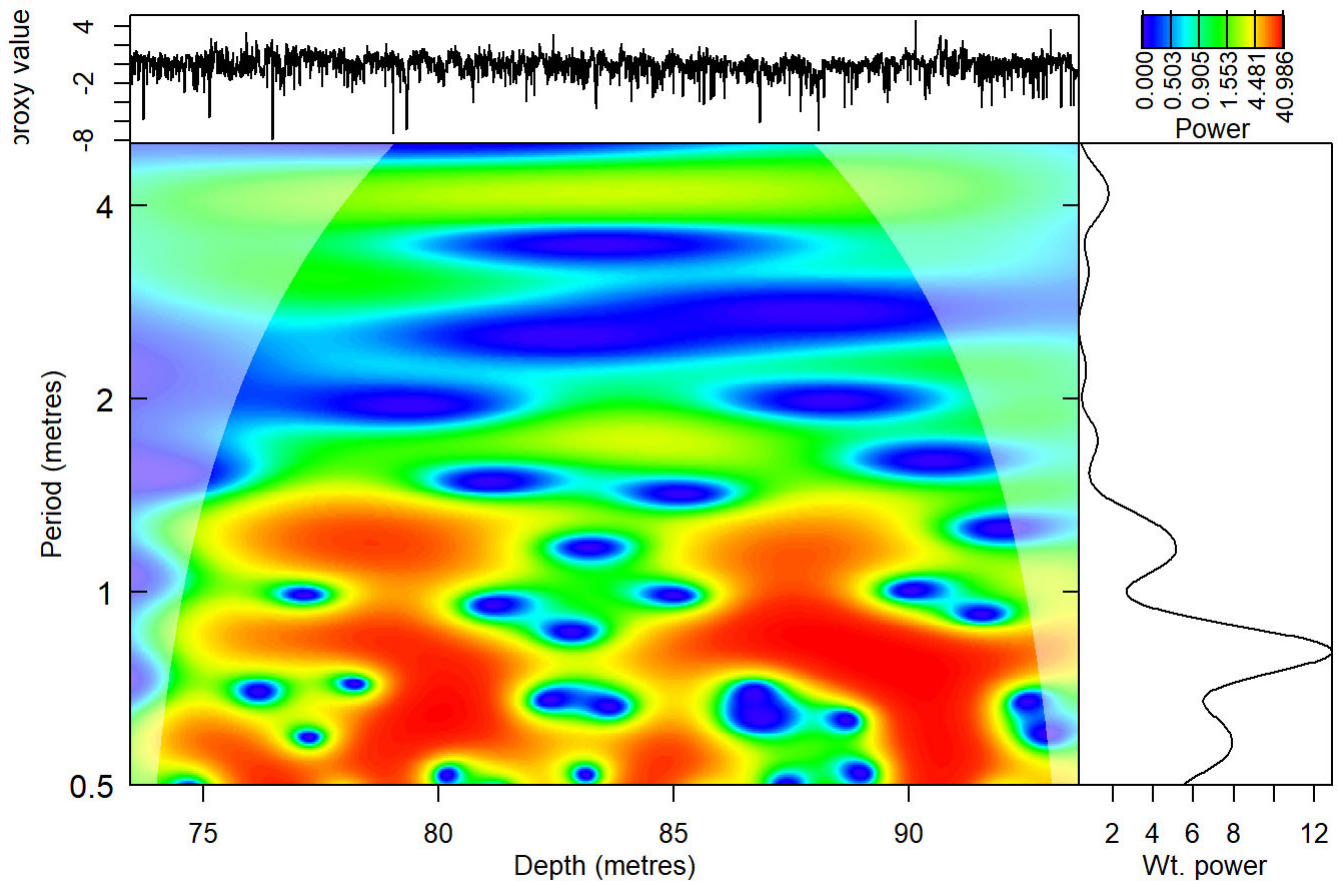

```

#track the period (m) of the 173 kyr cycle
#  alb_Ti_track_WR <- track_period_wavelet(astro_cycle = 173,
#                                          wavelet = alb_Ti_wt,
#                                          n.levels = 100,
#                                          periodlab = "Period (metres)",
#                                          x_lab = "depth (metres)",
#                                          palette_name = "rainbow",
#                                          color_brewer = "grDevices",
#                                          plot_horizontal = TRUE
#                                          )

#  alb_Ti_track_WR_comp <- completed_series(wavelet = alb_Ti_wt,
#                                          tracked_curve = alb_Ti_track_WR,
#                                          period_up = 1,
#                                          period_down = 0.70,
#                                          extrapolate = TRUE,
#                                          genplot = FALSE,
#                                          keep_editable = FALSE
#                                          )

#  alb_Ti_track_WR_comp[alb_Ti_track_WR_comp[,2]<0.74,2]<-0.74

#  alb_Ti_track_WR_comp <- loess_auto(alb_Ti_track_WR_comp)

#  write.csv(alb_Ti_track_WR_comp,"alb_Ti_track_WR.csv")

# Loading the tracked curve

```

```
alb_Ti_track_WR_comp <- read.csv("alb_Ti_track_WR.csv")
alb_Ti_track_WR_comp <- alb_Ti_track_WR_comp[,c(2,3)]
```

```
plot_wavelet(wavelet = alb_Ti_wt,
             lowerPeriod = NULL,
             upperPeriod = NULL,
             n.levels = 100,
             palette_name = "rainbow",
             color_brewer = "grDevices",
             useRaster = TRUE,
             periodlab = "Period (metres)",
             x_lab = "Depth (metres)",
             keep_editable = FALSE,
             dev_new = F,
             add_lines = cbind(alb_Ti_track_WR_comp[,1],
                               alb_Ti_track_WR_comp[,2]),
             add_points = NULL,
             add_abline_h = NULL,
             add_abline_v = NULL,
             add_MTM_peaks = FALSE,
             add_data = TRUE,
             add_avg = TRUE,
             add_MTM = FALSE,
             demean_mtm = TRUE,
             detrend_mtm = TRUE,
             padfac_mtm = 5,
             tbw_mtm = 3,
             plot_horizontal = TRUE
            )
```

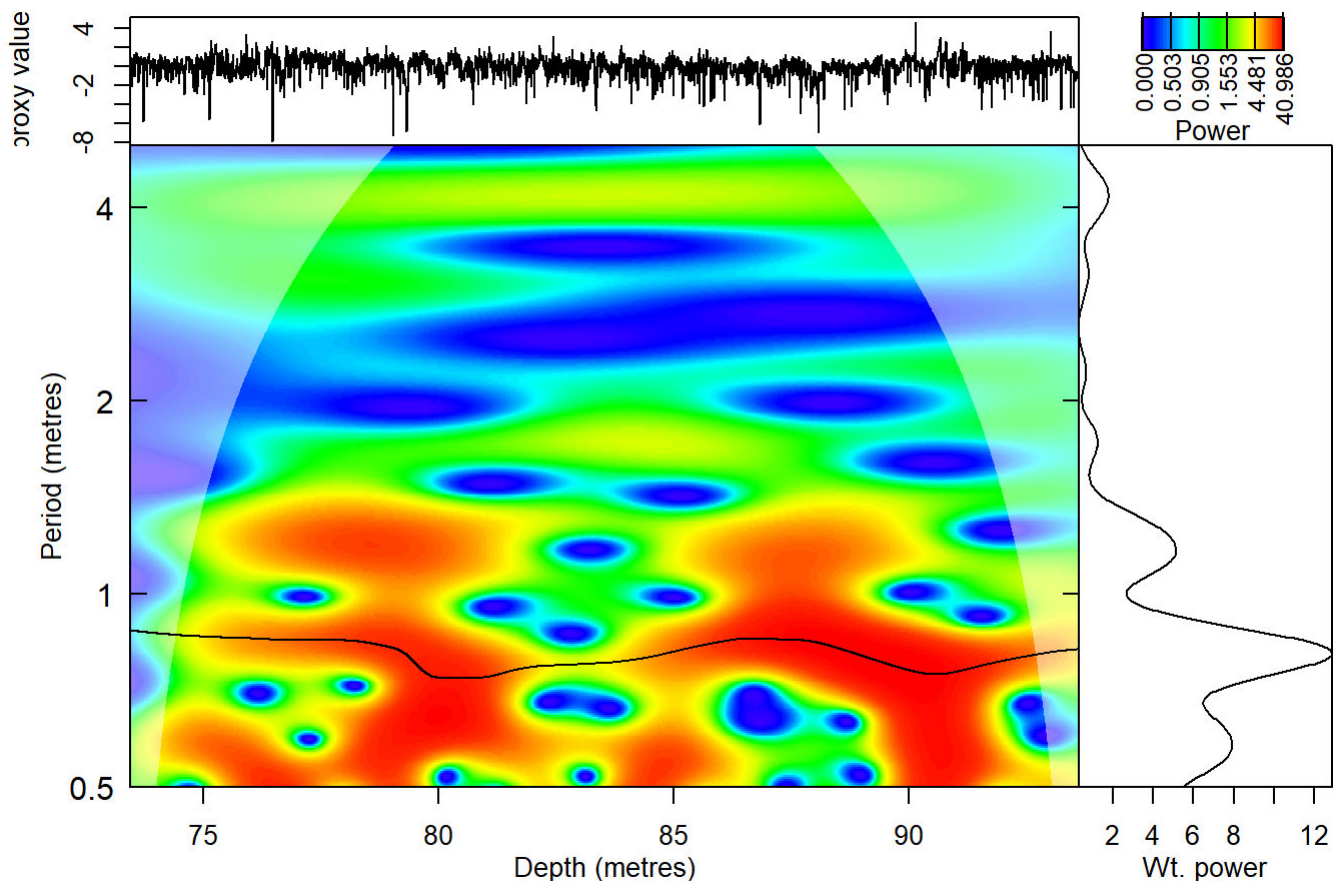



## 11.2.1.2. Silicon

```
alb_Si <- cbind(Alb$DepthAdj,Alb$Si)
alb_Si <- na.omit(alb_Si)
alb_Si[!is.finite(alb_Si)] <- NA
alb_Si <- na.omit(alb_Si)
alb_Si <- iso(dat=alb_Si, xmin=73.453, xmax=100)
```

----- ISOLATE STRATIGRAPHIC DATA BY LOCATION -----

```
* Number of data points= 30577
* Number of columns= 2
* Minimum= 62.111 , Maximum= 93.61
* Isolating data between 73.453 and 100
* Number of data points following culling= 19311
```

**Stratigraphic Series**

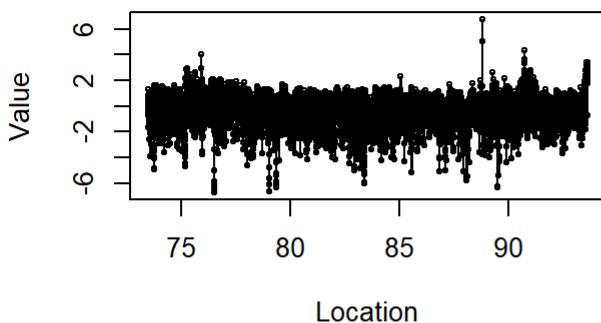

**Distribution of Isolated Values**

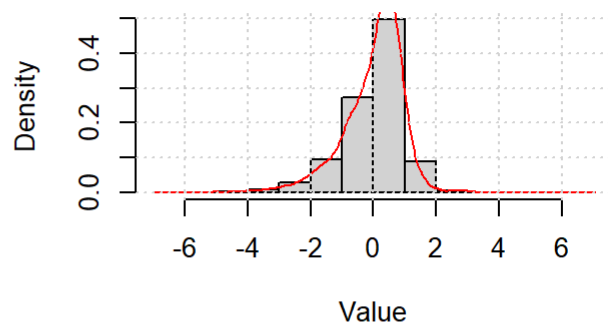

**Boxplot for Isolated Values**

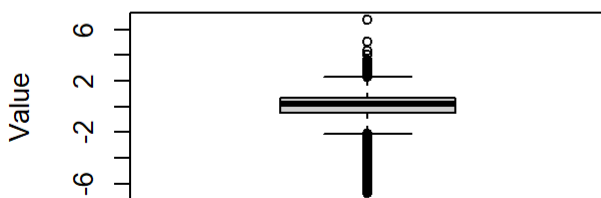

**Normal Q-Q Plot**

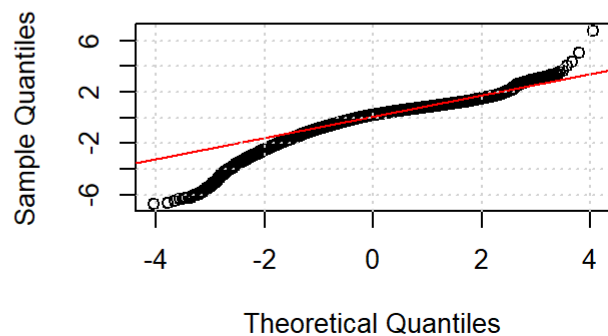

```
alb_Si_ndet <- linterp(alb_Si, dt=0.005, genplot=T)
```

----- APPLYING PIECEWISE-LINEAR INTERPOLATION TO STRATIGRAPHIC SERIES -----

```
* Number of samples= 19311
* New number of samples= 4032
```

**Raw (black) and Interpolated (red) Data**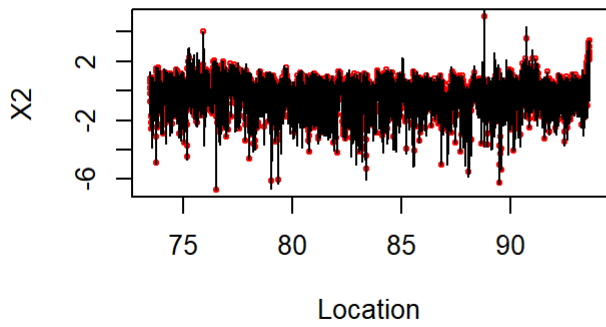**Distribution of Interpolated Values**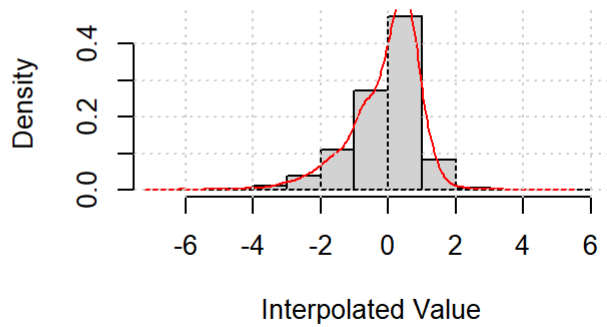**Boxplot of Interpolated Values**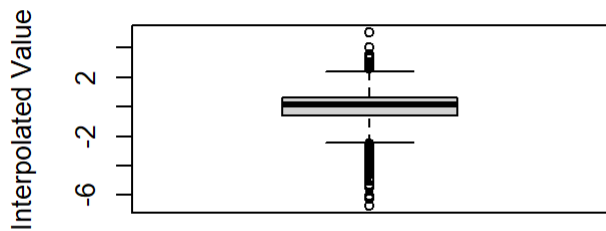**Normal Q-Q Plot**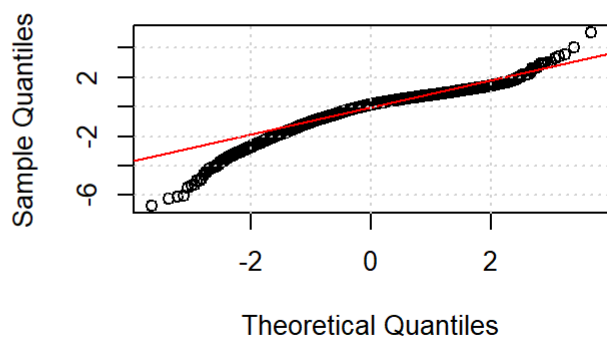

```
#Waverider
alb_Si_wt <- analyze_wavelet(alb_Si_ndet,
                             dj = 1/100,
                             lowerPeriod = 0.5,
                             upperPeriod = 5,
                             verbose = FALSE,
                             omega_nr = 10
                             )

plot_wavelet(wavelet = alb_Si_wt,
             lowerPeriod = NULL,
             upperPeriod = NULL,
             n.levels = 100,
             palette_name = "rainbow",
             color_brewer = "grDevices",
             useRaster = TRUE,
             periodlab = "Period (metres)",
             x_lab = "Depth (metres)",
             keep_editable = FALSE,
             dev_new = F,
             add_lines = NULL,
             add_points = NULL,
             add_abline_h = NULL,
             add_abline_v = NULL,
             add_MTM_peaks = FALSE,
             add_data = TRUE,
             add_avg = TRUE,
             add_MTM = FALSE,
             demean_mtm = TRUE,
             detrend_mtm = TRUE,
             padfac_mtm = 5,
```

```

tbw_mtm = 3,
plot_horizontal = TRUE
)

```

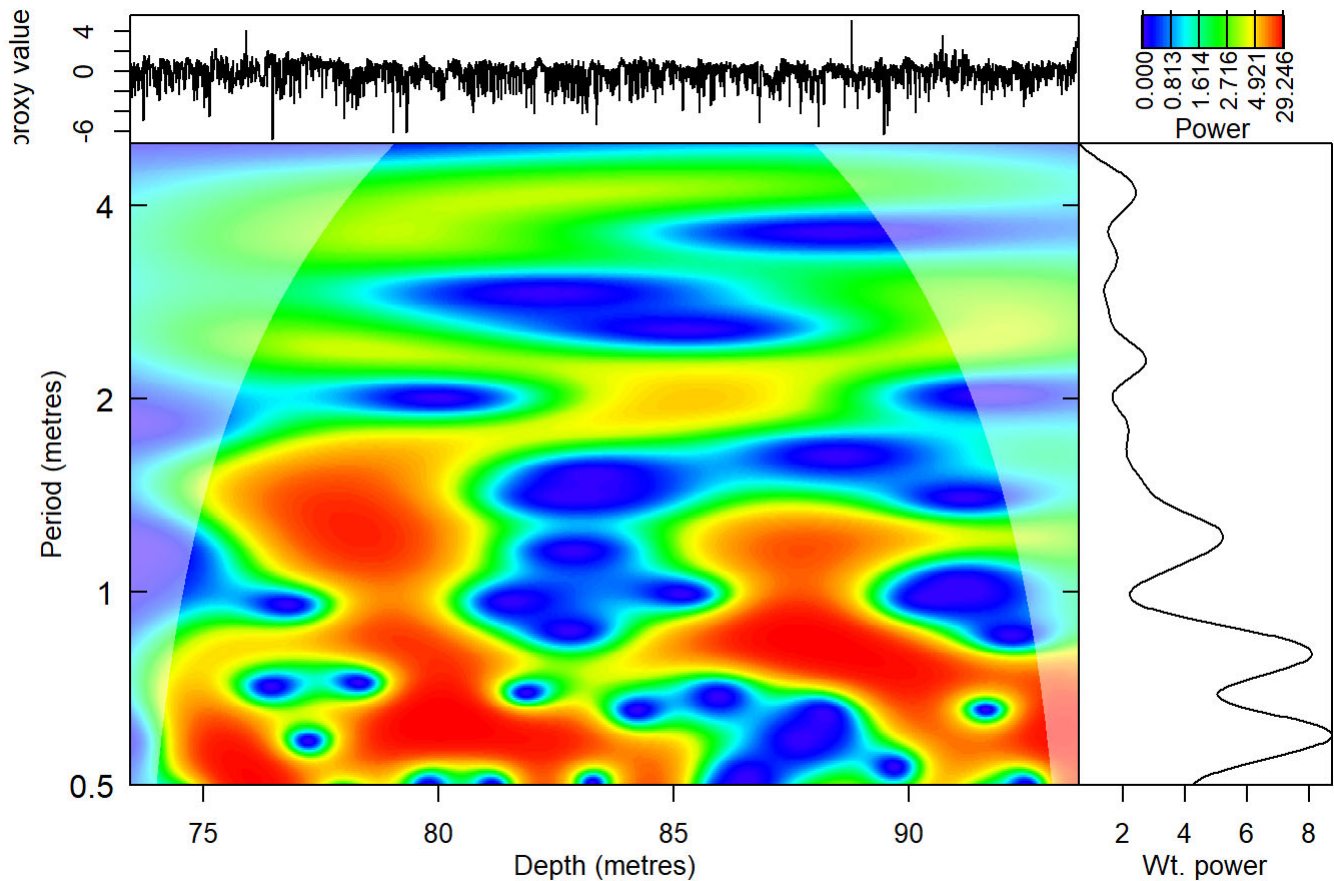

```

#track the period (m) of the 173 kyr cycle
# alb_Si_track_WR <- track_period_wavelet(astro_cycle = 173,
#                                         wavelet = alb_Si_wt,
#                                         n.levels = 100,
#                                         periodlab = "Period (metres)",
#                                         x_lab = "depth (metres)",
#                                         palette_name = "rainbow",
#                                         color_brewer = "grDevices",
#                                         plot_horizontal = TRUE
#                                         )

# alb_Si_track_WR_comp <- completed_series(wavelet = alb_Si_wt,
#                                           tracked_curve = alb_Si_track_WR,
#                                           period_up = 1,
#                                           period_down = 0.70,
#                                           extrapolate = TRUE,
#                                           genplot = FALSE,
#                                           keep_editable = FALSE
#                                           )

# alb_Si_track_WR_comp[alb_Si_track_WR_comp[,2]<0.74,2]<-0.74

```

```

#To keep a similar trend in the Si data in the 73-80 m interval, when tracking,
#we deliberately went for a higher band (above 0.9 m) and we implemented a
#highpass filter for all the values above 0.86m to keep a similar trend between
#Si and the other detrital elements

```

```

# alb_Si_track_WR_comp[alb_Si_track_WR_comp[,2]>0.86,2]<-0.81

# alb_Si_track_WR_comp <- loess_auto(alb_Si_track_WR_comp)

# write.csv(alb_Si_track_WR_comp,"alb_Si_track_WR.csv")

# Loading the tracked curve
alb_Si_track_WR_comp <- read.csv("alb_Si_track_WR.csv")
alb_Si_track_WR_comp <- alb_Si_track_WR_comp[,c(2,3)]

plot_wavelet(wavelet = alb_Si_wt,
             lowerPeriod = NULL,
             upperPeriod = NULL,
             n.levels = 100,
             palette_name = "rainbow",
             color_brewer = "grDevices",
             useRaster = TRUE,
             periodlab = "Period (metres)",
             x_lab = "Depth (metres)",
             keep_editable = FALSE,
             dev_new = F,
             add_lines = cbind(alb_Si_track_WR_comp[,1],
                               alb_Si_track_WR_comp[,2]),
             add_points = NULL,
             add_abline_h = NULL,
             add_abline_v = NULL,
             add_MTM_peaks = FALSE,
             add_data = TRUE,
             add_avg = TRUE,
             add_MTM = FALSE,
             demean_mtm = TRUE,
             detrend_mtm = TRUE,
             padfac_mtm = 5,
             tbw_mtm = 3,
             plot_horizontal = TRUE
            )

```

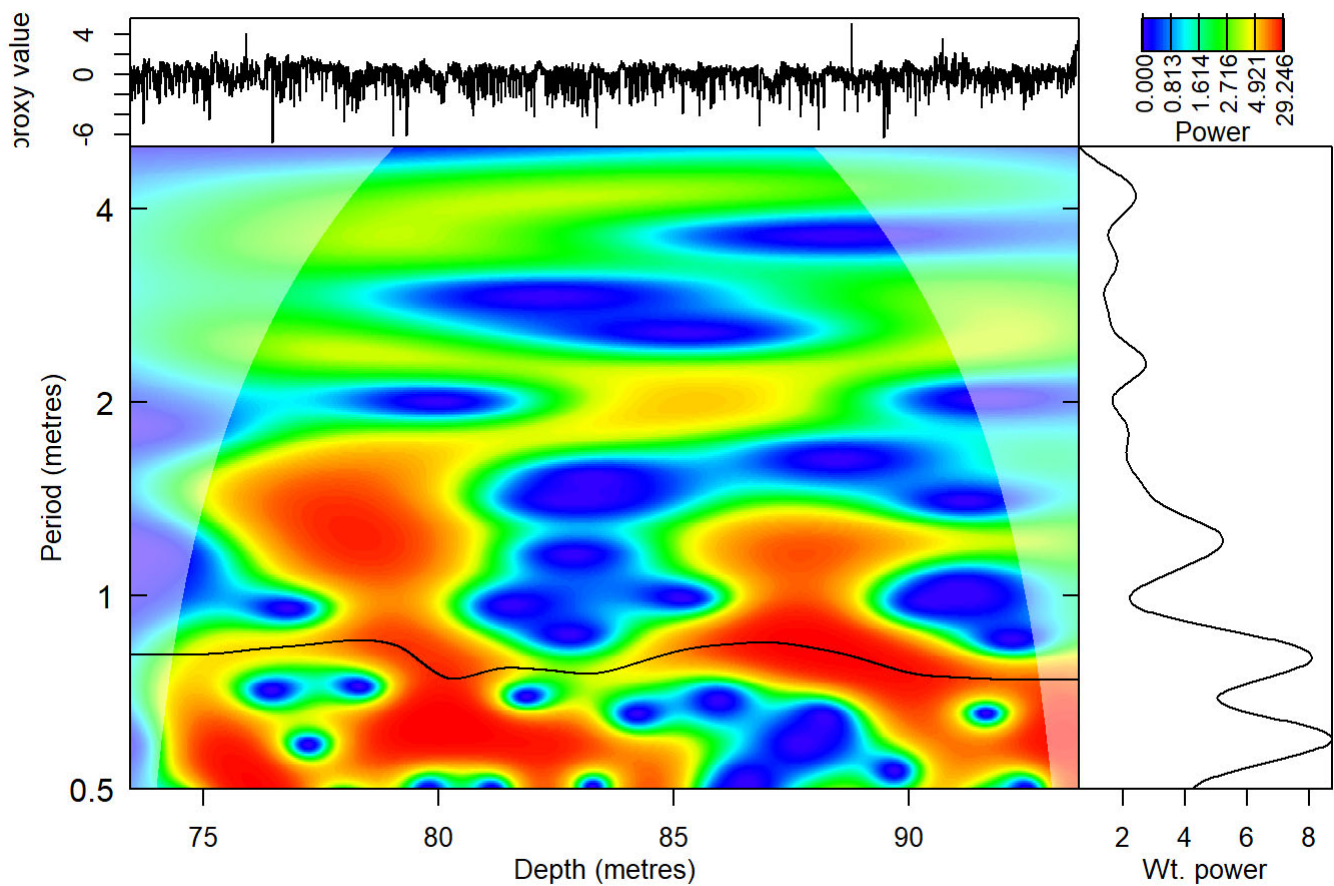

### 11.2.1.3. Aluminium

```
alb_A1 <- cbind(Alb$DepthAdj,Alb$Al)
alb_A1 <- na.omit(alb_A1)
alb_A1[!is.finite(alb_A1)] <- NA
alb_A1 <- na.omit(alb_A1)
alb_A1 <- iso(dat=alb_A1, xmin=73.453, xmax=100)
```

----- ISOLATE STRATIGRAPHIC DATA BY LOCATION -----

```
* Number of data points= 30062
* Number of columns= 2
* Minimum= 62.111 , Maximum= 93.609
* Isolating data between 73.453 and 100
* Number of data points following culling= 18796
```

**Stratigraphic Series**



**Distribution of Isolated Values**



**Boxplot for Isolated Values**

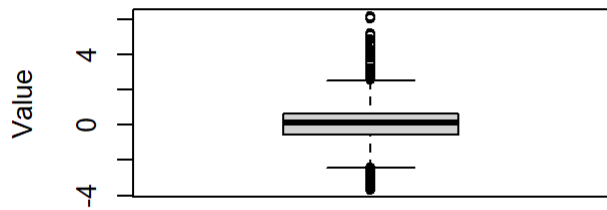

**Normal Q-Q Plot**

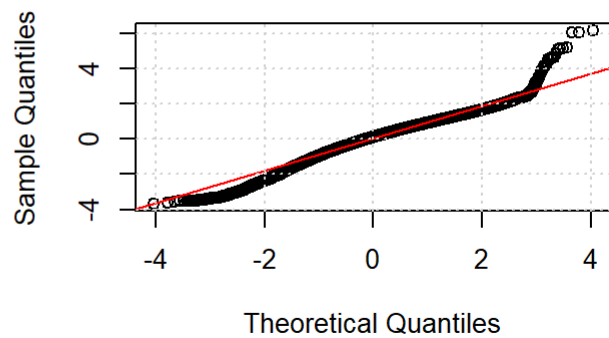

```
alb_A1_ndet <- linterp(alb_A1, dt=0.005, genplot=T)
```

----- APPLYING PIECEWISE-LINEAR INTERPOLATION TO STRATIGRAPHIC SERIES -----

- \* Number of samples= 18796
- \* New number of samples= 4032

**Raw (black) and Interpolated (red) Data**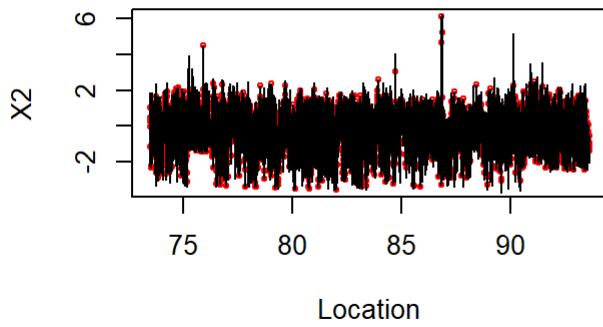**Distribution of Interpolated Values**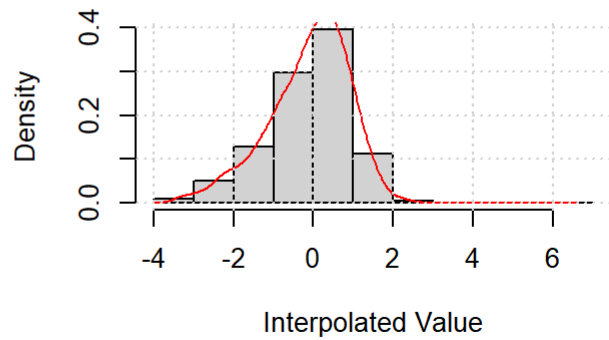**Boxplot of Interpolated Values**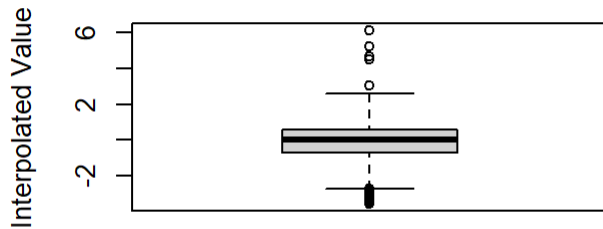**Normal Q-Q Plot**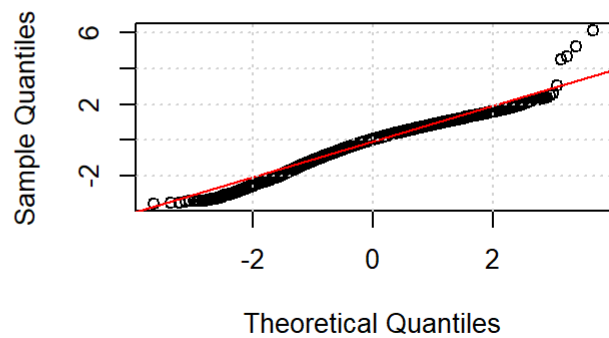

```
#Waverider
alb_A1_wt <- analyze_wavelet(alb_A1_ndet,
                             dj = 1/100,
                             lowerPeriod = 0.5,
                             upperPeriod = 5,
                             verbose = FALSE,
                             omega_nr = 10
                             )

plot_wavelet(wavelet = alb_A1_wt,
             lowerPeriod = NULL,
             upperPeriod = NULL,
             n.levels = 100,
             palette_name = "rainbow",
             color_brewer = "grDevices",
             useRaster = TRUE,
             periodlab = "Period (metres)",
             x_lab = "Depth (metres)",
             keep_editable = FALSE,
             dev_new = F,
             add_lines = NULL,
             add_points = NULL,
             add_abline_h = NULL,
             add_abline_v = NULL,
             add_MTM_peaks = FALSE,
             add_data = TRUE,
             add_avg = TRUE,
             add_MTM = FALSE,
             demean_mtm = TRUE,
             detrend_mtm = TRUE,
             padfac_mtm = 5,
             )
```

```

tbw_mtm = 3,
plot_horizontal = TRUE
)

```

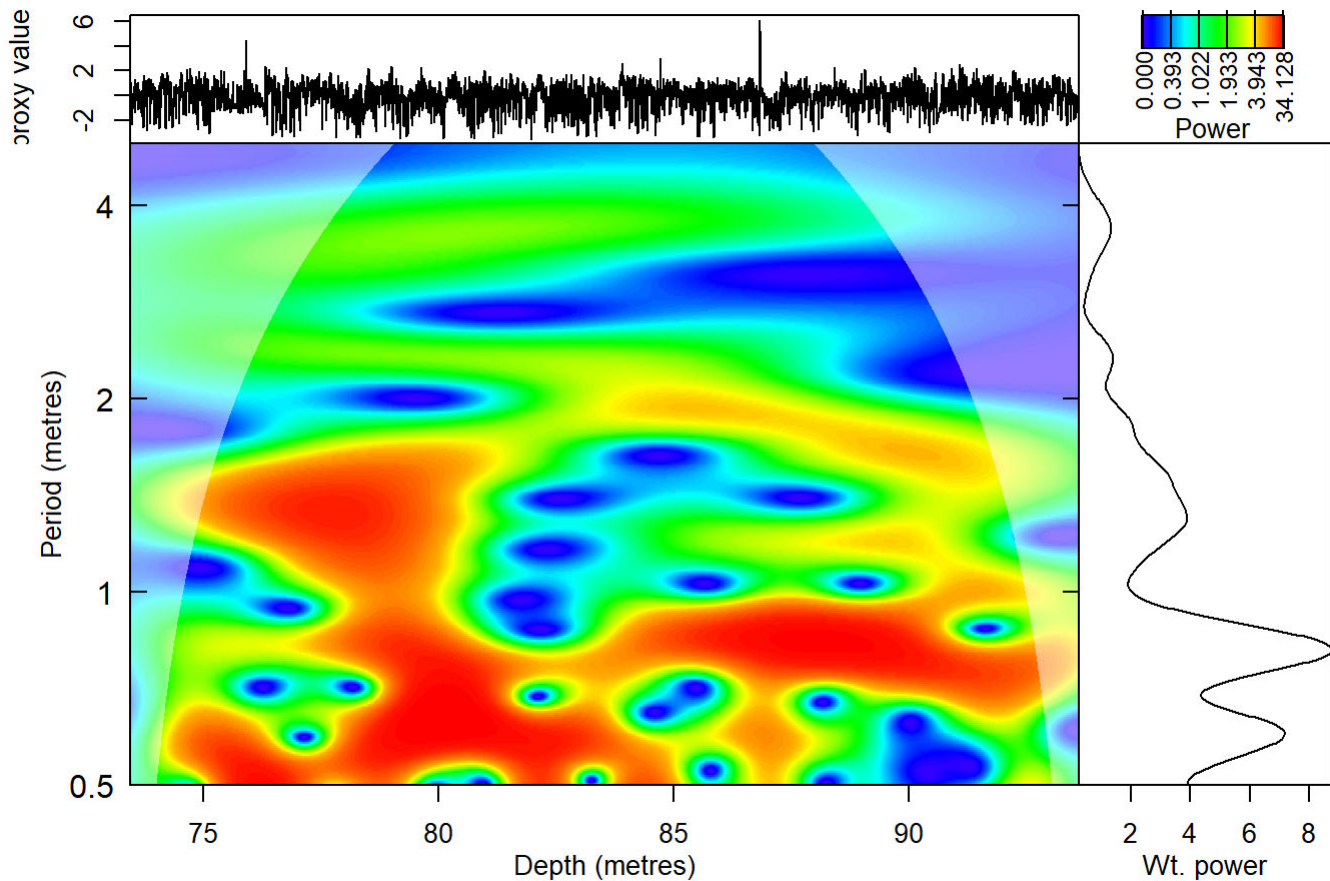

```

#track the period (m) of the 173 kyr cycle
# alb_Al_track_WR <- track_period_wavelet(astro_cycle = 173,
#                                         wavelet = alb_Al_wt,
#                                         n.levels = 100,
#                                         periodlab = "Period (metres)",
#                                         x_lab = "depth (metres)",
#                                         palette_name = "rainbow",
#                                         color_brewer = "grDevices",
#                                         plot_horizontal = TRUE
#                                         )

# alb_Al_track_WR_comp <- completed_series(wavelet = alb_Al_wt,
#                                           tracked_curve = alb_Al_track_WR,
#                                           period_up = 1,
#                                           period_down = 0.70,
#                                           extrapolate = TRUE,
#                                           genplot = FALSE,
#                                           keep_editable = FALSE
#                                           )

# alb_Al_track_WR_comp[alb_Al_track_WR_comp[,2]<0.74,2]<-0.74

# alb_Al_track_WR_comp <- loess_auto(alb_Al_track_WR_comp)

# write.csv(alb_Al_track_WR_comp,"alb_Al_track_WR.csv")

```



```

# Loading the tracked curve
alb_A1_track_WR_comp <- read.csv("alb_A1_track_WR.csv")
alb_A1_track_WR_comp <- alb_A1_track_WR_comp[,c(2,3)]

plot_wavelet(wavelet = alb_A1_wt,
             lowerPeriod = NULL,
             upperPeriod = NULL,
             n.levels = 100,
             palette_name = "rainbow",
             color_brewer = "grDevices",
             useRaster = TRUE,
             periodlab = "Period (metres)",
             x_lab = "Depth (metres)",
             keep_editable = FALSE,
             dev_new = F,
             add_lines = cbind(alb_A1_track_WR_comp[,1],
                               alb_A1_track_WR_comp[,2]),

             add_points = NULL,
             add_abline_h = NULL,
             add_abline_v = NULL,
             add_MTM_peaks = FALSE,
             add_data = TRUE,
             add_avg = TRUE,
             add_MTM = FALSE,
             demean_mtm = TRUE,
             detrend_mtm = TRUE,
             padfac_mtm = 5,
             tbw_mtm = 3,
             plot_horizontal = TRUE
            )

```

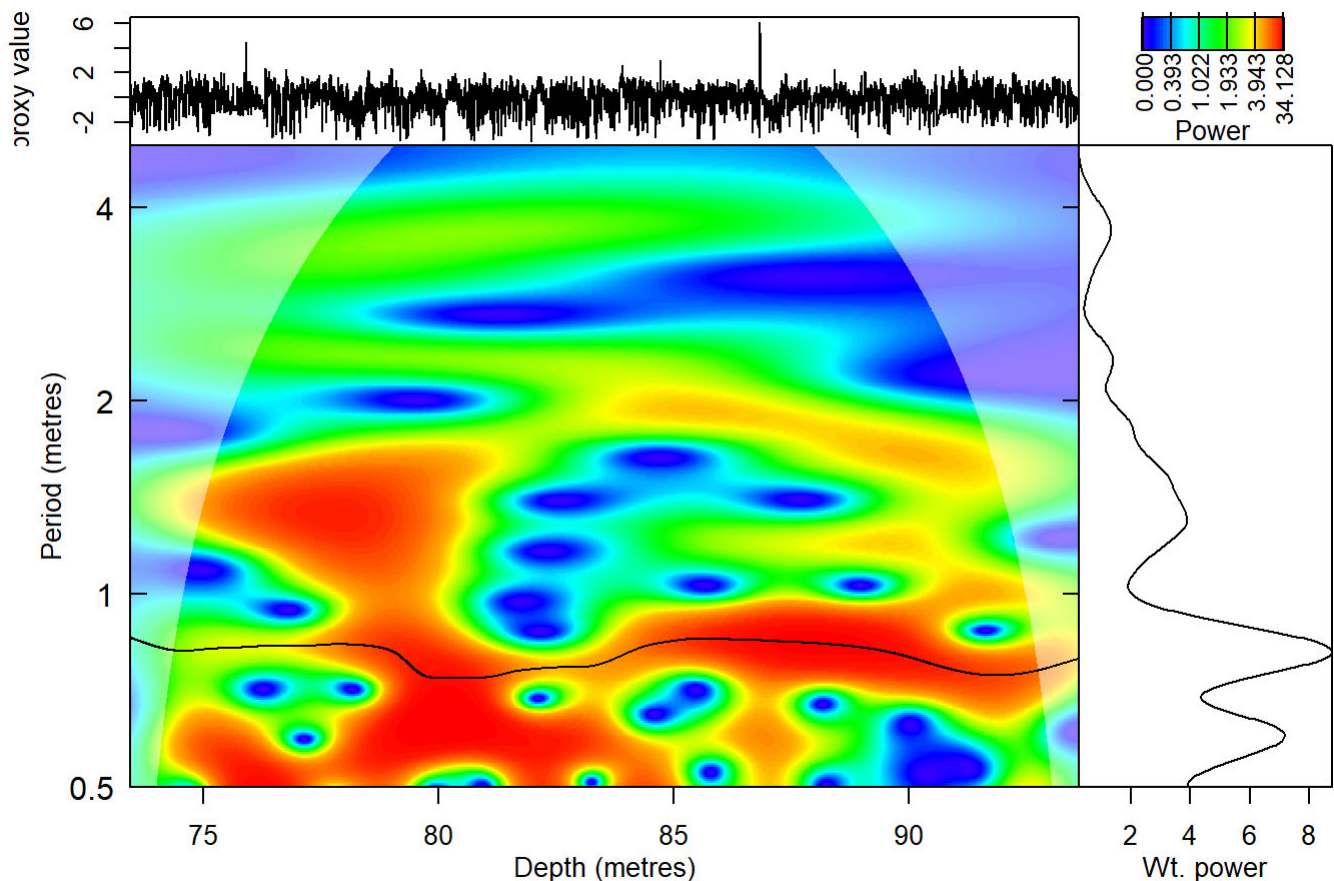

## 11.2.1.4. Potassium

```
alb_K <- cbind(Alb$DepthAdj,Alb$K)
alb_K <- na.omit(alb_K)
alb_K[!is.finite(alb_K)] <- NA
alb_K <- na.omit(alb_K)
alb_K <- iso(dat=alb_K, xmin=73.453, xmax=100)
```

----- ISOLATE STRATIGRAPHIC DATA BY LOCATION -----

- \* Number of data points= 19311
- \* Number of columns= 2
- \* Minimum= 73.453 , Maximum= 93.61
- \* Isolating data between 73.453 and 100
- \* Number of data points following culling= 19311

**Stratigraphic Series**

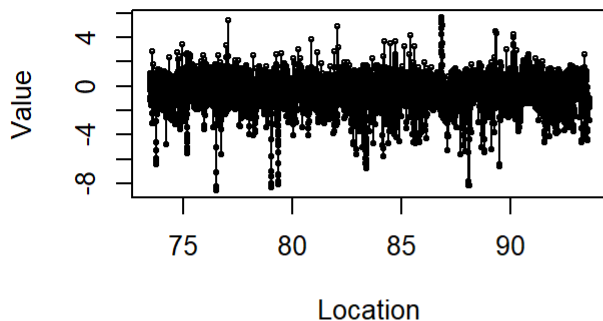

**Distribution of Isolated Values**

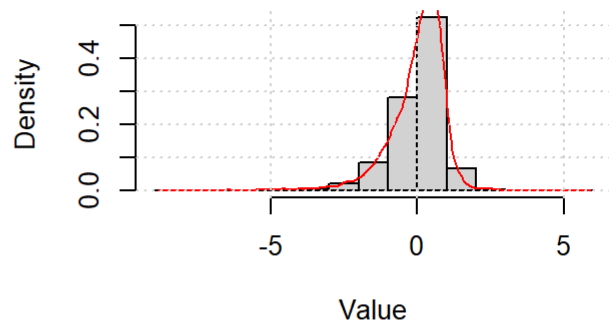

**Boxplot for Isolated Values**

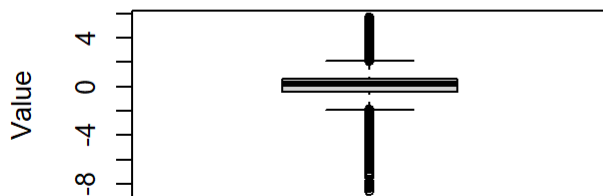

**Normal Q-Q Plot**

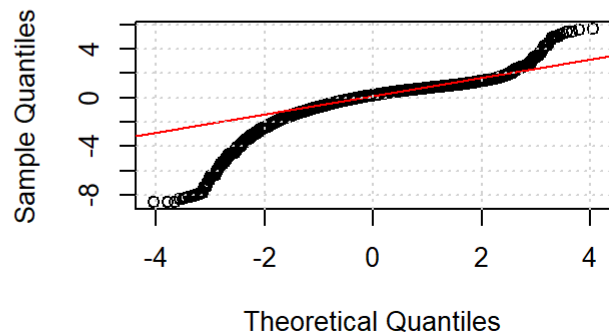

```
alb_K_ndet <- linterp(alb_K, dt=0.005, genplot=T)
```

----- APPLYING PIECEWISE-LINEAR INTERPOLATION TO STRATIGRAPHIC SERIES -----

- \* Number of samples= 19311
- \* New number of samples= 4032

**Raw (black) and Interpolated (red) Data**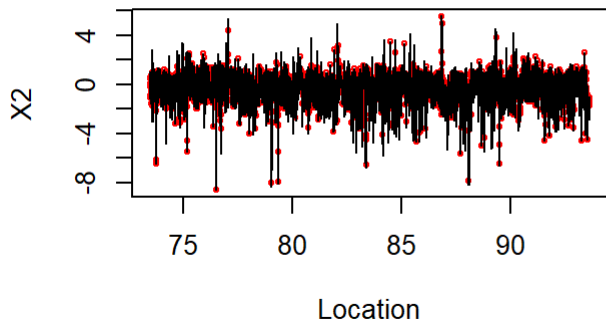**Distribution of Interpolated Values**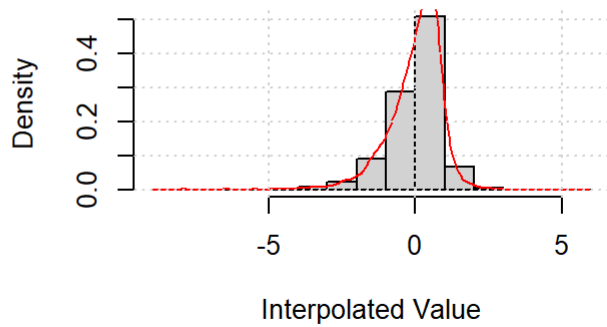**Boxplot of Interpolated Values**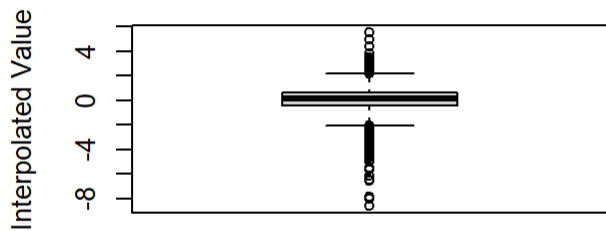**Normal Q-Q Plot**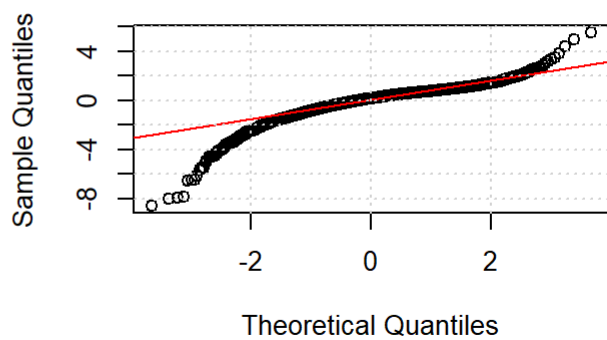

```
#Waverider
alb_K_wt <- analyze_wavelet(alb_K_ndet,
                             dj = 1/100,
                             lowerPeriod = 0.5,
                             upperPeriod = 5,
                             verbose = FALSE,
                             omega_nr = 10
                             )

plot_wavelet(wavelet = alb_K_wt,
             lowerPeriod = NULL,
             upperPeriod = NULL,
             n.levels = 100,
             palette_name = "rainbow",
             color_brewer = "grDevices",
             useRaster = TRUE,
             periodlab = "Period (metres)",
             x_lab = "Depth (metres)",
             keep_editable = FALSE,
             dev_new = F,
             add_lines = NULL,
             add_points = NULL,
             add_abline_h = NULL,
             add_abline_v = NULL,
             add_MTM_peaks = FALSE,
             add_data = TRUE,
             add_avg = TRUE,
             add_MTM = FALSE,
             demean_mtm = TRUE,
             detrend_mtm = TRUE,
             padfac_mtm = 5,
```

```

tbw_mtm = 3,
plot_horizontal = TRUE
)

```

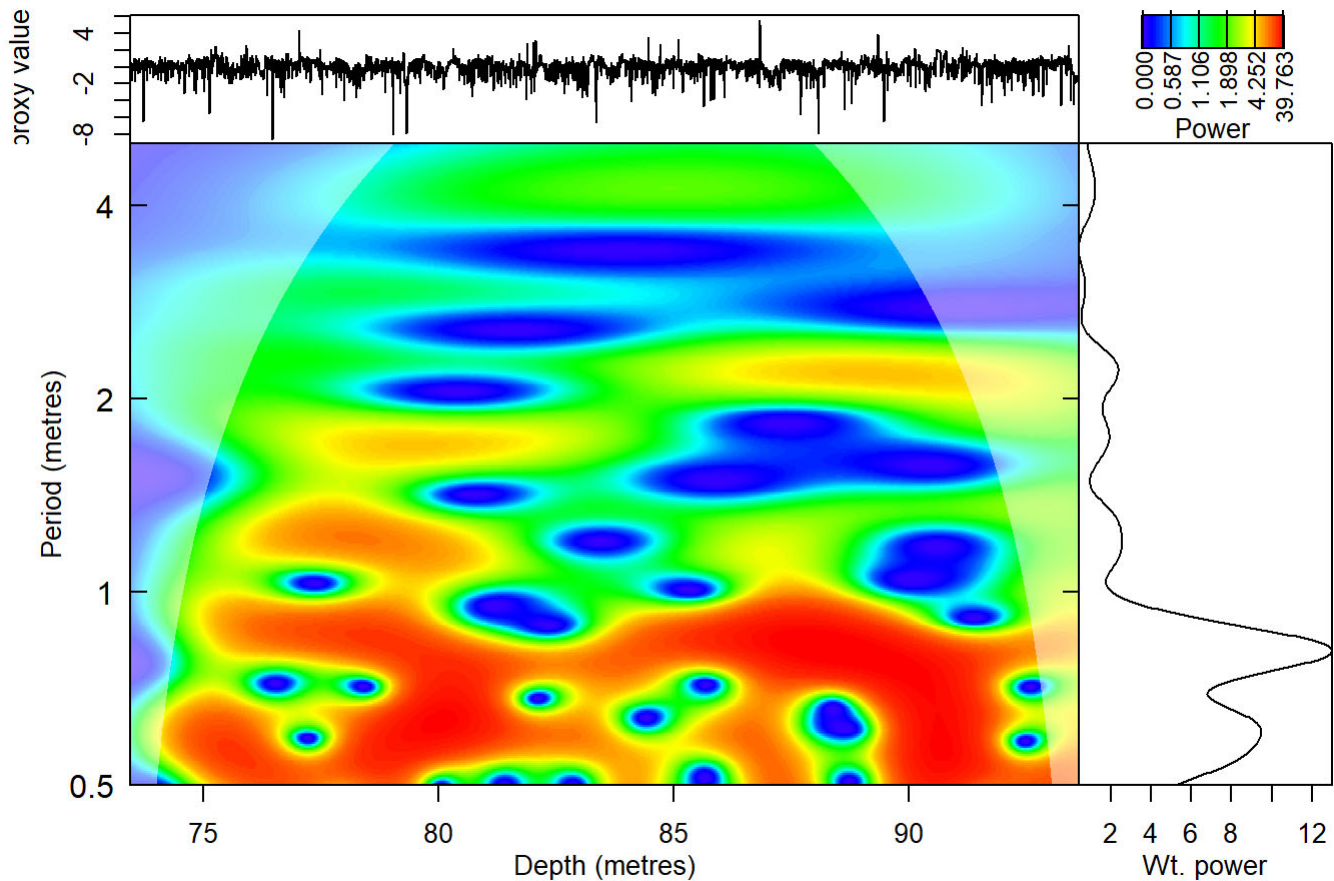

```

#track the period (m) of the 173 kyr cycle
#alb_K_track_WR <- track_period_wavelet(astro_cycle = 173,
#                                     wavelet = alb_K_wt,
#                                     n.levels = 100,
#                                     periodlab = "Period (metres)",
#                                     x_lab = "depth (metres)",
#                                     palette_name = "rainbow",
#                                     color_brewer = "grDevices",
#                                     plot_horizontal = TRUE
#                                     )

# alb_K_track_WR_comp <- completed_series(wavelet = alb_K_wt,
#                                     tracked_curve = alb_K_track_WR,
#                                     period_up = 1,
#                                     period_down = 0.70,
#                                     extrapolate = TRUE,
#                                     genplot = FALSE,
#                                     keep_editable = FALSE
#                                     )

# alb_K_track_WR_comp[alb_K_track_WR_comp[,2]<0.74,2]<-0.74

#To keep a similar trend in the K data in the 73-80 m interval, when tracking,
#we implemented a highpass filter for all the values above 0.875m to keep a
#similar trend between K and the other detrital elements

# alb_K_track_WR_comp[alb_K_track_WR_comp[,2]>0.875,2]<-0.875

```

```

# alb_K_track_WR_comp <- loess_auto(alb_K_track_WR_comp)

# write.csv(alb_K_track_WR_comp,"alb_K_track_WR.csv")

# Loading the tracked curve
alb_K_track_WR_comp <- read.csv("alb_K_track_WR.csv")
alb_K_track_WR_comp <- alb_K_track_WR_comp[,c(2,3)]

plot_wavelet(wavelet = alb_K_wt,
             lowerPeriod = NULL,
             upperPeriod = NULL,
             n.levels = 100,
             palette_name = "rainbow",
             color_brewer = "grDevices",
             useRaster = TRUE,
             periodlab = "Period (metres)",
             x_lab = "Depth (metres)",
             keep_editable = FALSE,
             dev_new = F,
             add_lines = cbind(alb_K_track_WR_comp[,1],
                               alb_K_track_WR_comp[,2]),
             add_points = NULL,
             add_abline_h = NULL,
             add_abline_v = NULL,
             add_MTM_peaks = FALSE,
             add_data = TRUE,
             add_avg = TRUE,
             add_MTM = FALSE,
             demean_mtm = TRUE,
             detrend_mtm = TRUE,
             padfac_mtm = 5,
             tbw_mtm = 3,
             plot_horizontal = TRUE
            )

```

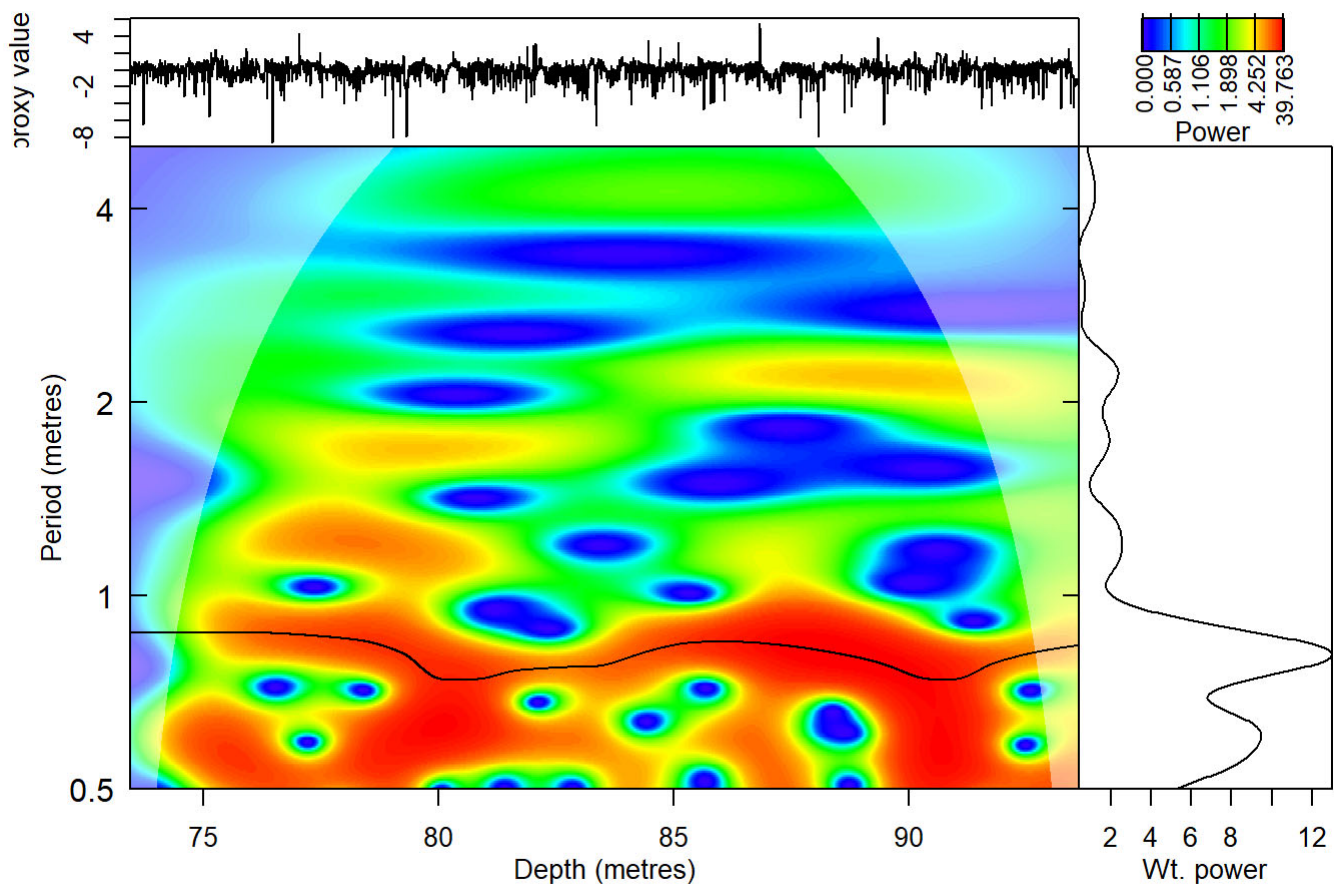

#### 11.2.1.5. Depth model resulting from the 173 kyr cycle tracking of the 4 detrital elements

```
alb_Ti_track_comp1 <- read.csv("alb_Ti_track_WR.csv")
alb_Si_track_comp1 <- read.csv("alb_Si_track_WR.csv")
alb_Al_track_comp1 <- read.csv("alb_Al_track_WR.csv")
alb_K_track_comp1 <- read.csv("alb_K_track_WR.csv")
```

```
plot(alb_Ti_track_comp1[,2],
     100*(alb_Ti_track_comp1[,3]),
     type="l",col="black",
     lwd= 2,
     xlab = "Depth adjusted (m)",
     ylab = "Period (cm)",
     ylim = c(70,92)
)
```

```
lines(alb_Si_track_comp1[,2],
      100*(alb_Si_track_comp1[,3]),
      col="red",
      lwd=2
)
```

```
lines(alb_Al_track_comp1[,2],
      100*(alb_Al_track_comp1[,3]),
      col="green",
      lwd=2
)
```

```
lines(alb_K_track_comp1[,2],
      100*(alb_K_track_comp1[,3]),
```

```

col="blue",
lwd=2
)

track_comp_1 <- cbind(alb_Ti_track_comp1[,3],
                     alb_Si_track_comp1[,3],
                     alb_Al_track_comp1[,3],
                     alb_K_track_comp1[,3]
                     )

depth<-alb_Ti_track_comp1[,2]
curve_mean <- rowMeans(100*(track_comp_1))
curve_sd <- rowSds(100*(track_comp_1))

# Add polygon for mean  $\pm$  SD
polygon(c(depth, rev(depth)),
       c(curve_mean + curve_sd, rev(curve_mean - curve_sd)),
       col = rgb(0.7, 0.7, 0.7, 0.4), border = NA)

# Optionally overlay mean line
lines(depth, curve_mean, col = "yellow", lwd = 2)

legend("bottomleft",
      legend = c("Ti", "Si", "K", "Al", "Mean", "Mean  $\pm$  SD"),
      col = c("black", "red", "blue", "green", "yellow", rgb(0.7, 0.7, 0.7, 0.8)),
      lty = c(1, 1, 1, 1, 1, NA),
      lwd = c(2, 2, 2, 2, 2, NA),
      pch = c(NA, NA, NA, NA, NA, 15),
      pt.cex = 2,
      bty = "n",           # No box around legend
      cex = 0.75)         # Larger legend text

```

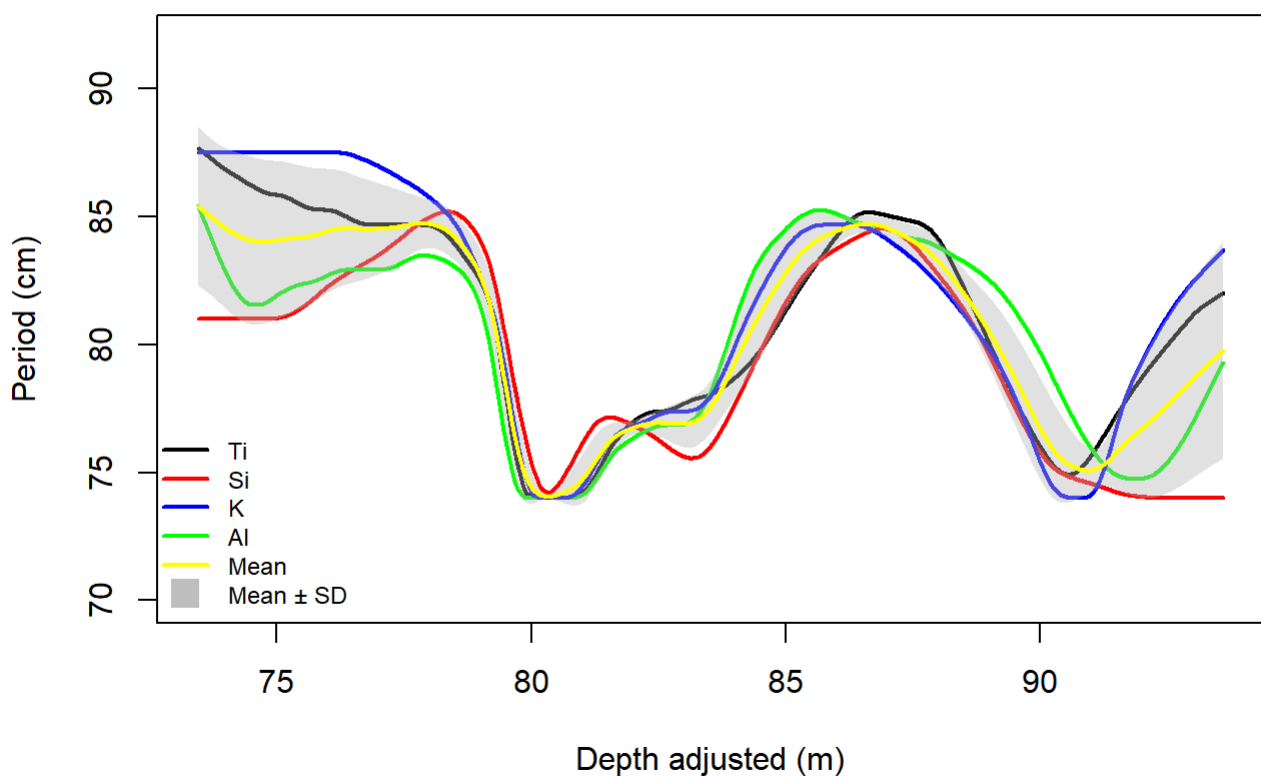



## 11.2.2. Age model

```
#Age model
track_comp_1_mean <- rowMeans(1/track_comp_1)

track_comp_1_sds <- rowSds(1/track_comp_1)

track_comp_1_plus_2Sd <- cbind(alb_Ti_track_comp1[,2],
                              1/(track_comp_1_mean+(2*track_comp_1_sds)))

track_comp_1_min_2Sd <- cbind(alb_Ti_track_comp1[,2],
                              1/(track_comp_1_mean-(2*track_comp_1_sds)))

track_comp_1_mean <- cbind(alb_Ti_track_comp1[,2],1/track_comp_1_mean)

time_track_plus_2Sd <- curve2time(track_comp_1_plus_2Sd,tracked_cycle_period = 173)

time_track_min_2Sd <- curve2time(track_comp_1_min_2Sd,tracked_cycle_period = 173)

time_mean <- curve2time(track_comp_1_mean,tracked_cycle_period = 173)

Mean_AgeModel_WR<-time_mean
Max_AgeModel_WR<-time_track_plus_2Sd
Min_AgeModel_WR<-time_track_min_2Sd

plot(Mean_AgeModel_WR,type="l", xlab="Depth adjusted (m)", ylab="Time (ka)")
lines(Max_AgeModel_WR,col="green")
lines(Min_AgeModel_WR,col="blue")

legend("bottomright",
      legend = c("Maximum age (+2 SD)","Mean age", "Minimum age (-2 SD)"),
      col = c("green","black","blue"),
      lty = c(1, 1, 1),
      lwd = c(2, 2, 2),
      pch = c(NA, NA, NA),
      pt.cex = 2,
      bty = "n",          # No box around legend
      cex = 1)           # Larger legend text
```



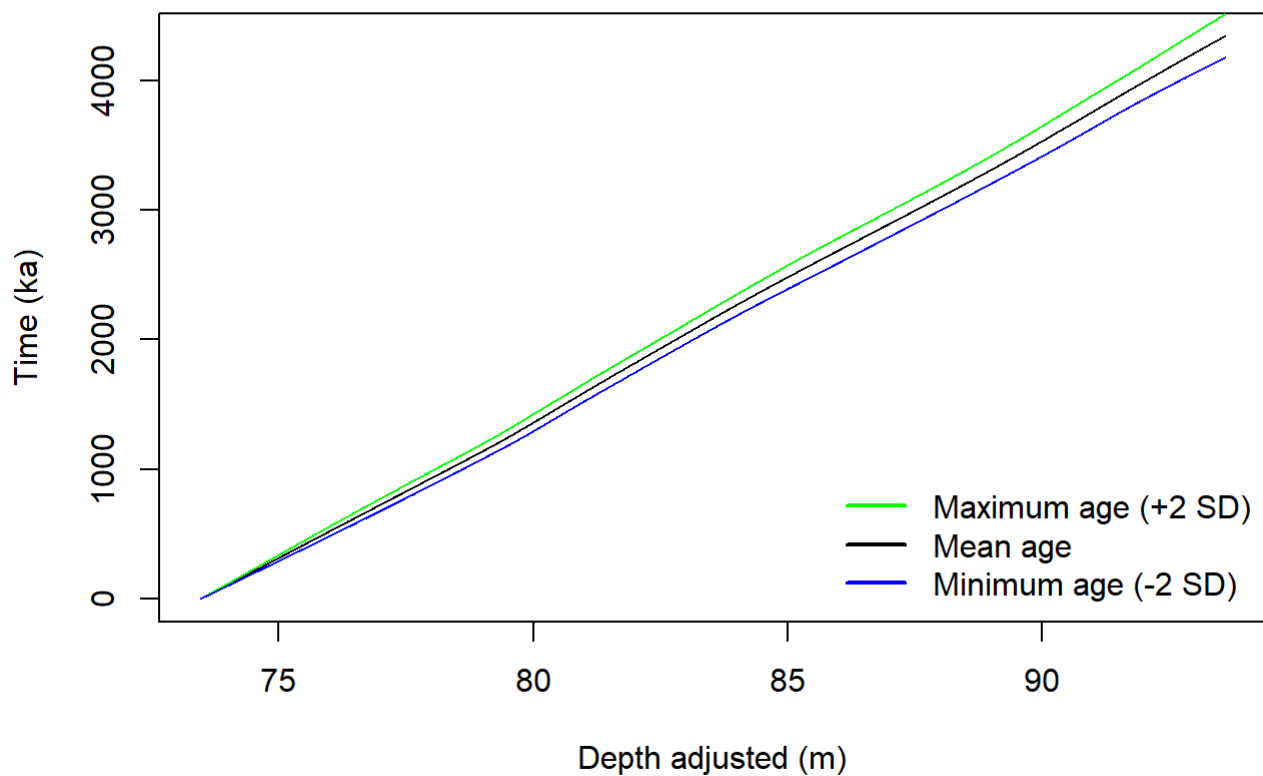

```
Age_Model_WR <- cbind(Mean_AgeModel_WR,Max_AgeModel_WR[,2],Min_AgeModel_WR[,2])
colnames(Age_Model_WR)<- cbind("Adjusted depth (m)",
                                "Mean age (ka)",
                                "Max age (ka)",
                                "Min age (ka)"
                                )
```

```
#Interpolation every 1mm of the Age-depth model to have a direct comparison
#between the age model and the original sampling rate of 1mm
Mean_Age_Model_WR_1mm <- linterp(Mean_AgeModel_WR, dt=0.001, genplot=T)
```

----- APPLYING PIECEWISE-LINEAR INTERPOLATION TO STRATIGRAPHIC SERIES -----

```
* Number of samples= 4032
* New number of samples= 20155
```

**Raw (black) and Interpolated (red) Data**

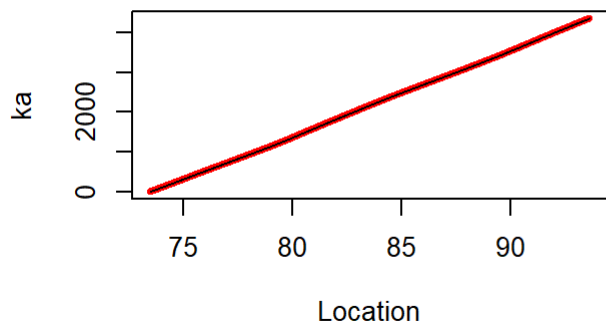

**Distribution of Interpolated Values**

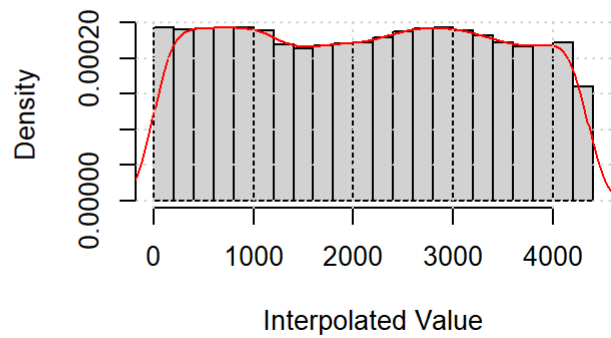

**Boxplot of Interpolated Values**

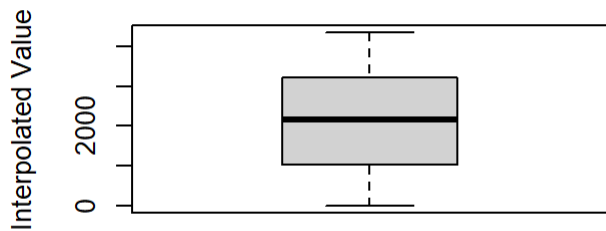

**Normal Q-Q Plot**

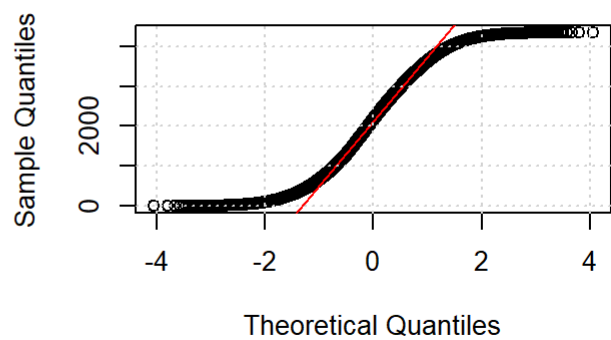

```
Max_Age_Model_WR_1mm <- linterp(Max_AgeModel_WR, dt=0.001, genplot=T)
```

----- APPLYING PIECEWISE-LINEAR INTERPOLATION TO STRATIGRAPHIC SERIES -----

- \* Number of samples= 4032
- \* New number of samples= 20155

**Raw (black) and Interpolated (red) Data**

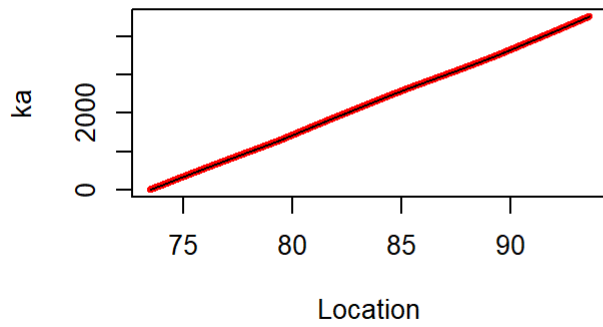

**Distribution of Interpolated Values**

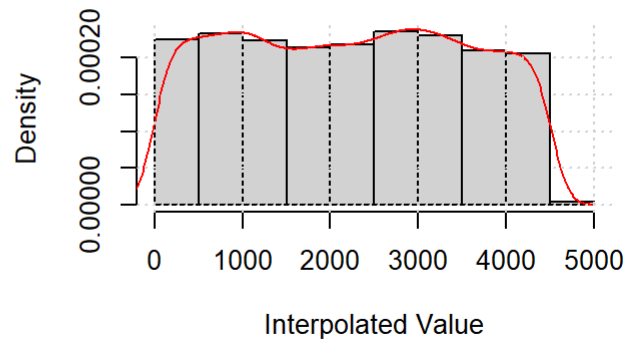

**Boxplot of Interpolated Values**

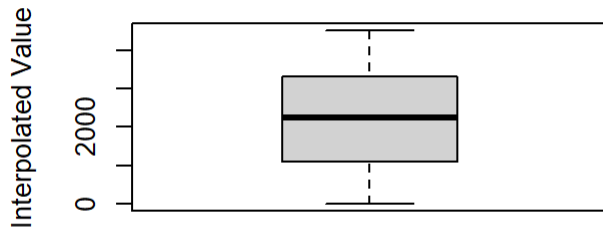

**Normal Q-Q Plot**

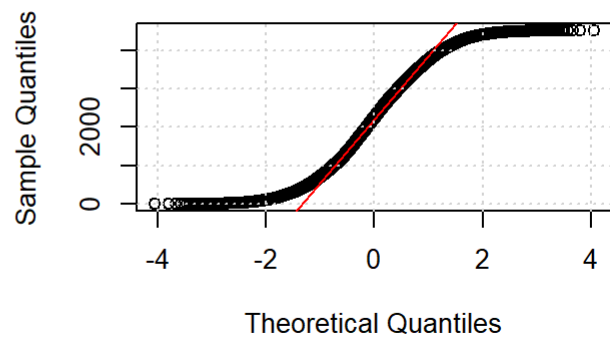

```
Min_Age_Model_WR_1mm <- linterp(Min_AgeModel_WR, dt=0.001, genplot=T)
```

----- APPLYING PIECEWISE-LINEAR INTERPOLATION TO STRATIGRAPHIC SERIES -----

- \* Number of samples= 4032
- \* New number of samples= 20155

**Raw (black) and Interpolated (red) Data**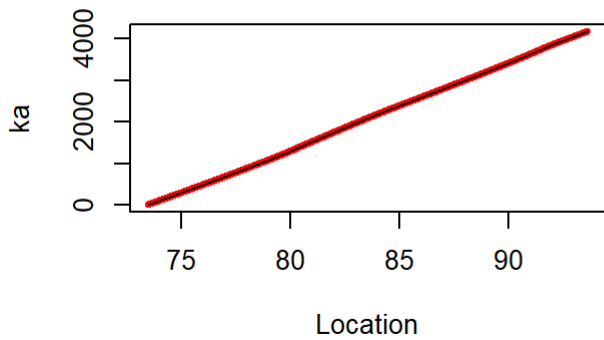**Distribution of Interpolated Values**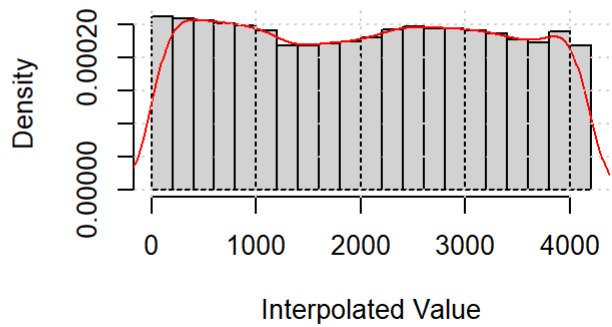**Boxplot of Interpolated Values**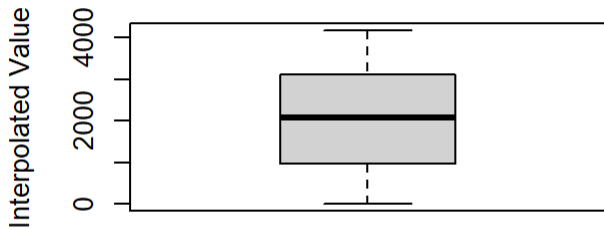**Normal Q-Q Plot**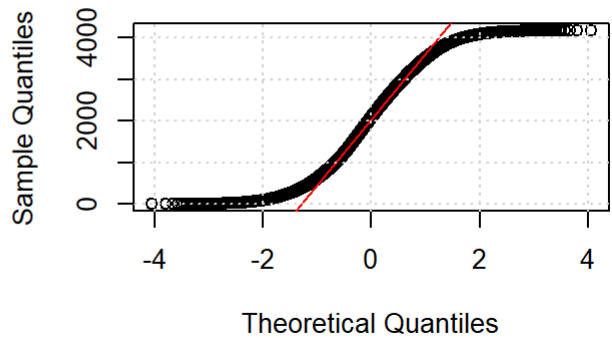

```
Age_Model_WR_1mm <- cbind(Mean_Age_Model_WR_1mm,
                          Max_Age_Model_WR_1mm[,2],
                          Min_Age_Model_WR_1mm[,2]
                          )

colnames(Age_Model_WR)<- cbind("Adjusted depth (m)",
                              "Mean age (ka)",
                              "Max age (ka)",
                              "Min age (ka)"
                              )

#Saving of the age model as .csv files
# write.csv(Age_Model_WR,"AgeModel_WR_rsp5mm.csv")
# write.csv(Age_Model_WR_1mm,"AgeModel_WR_rsp1mm.csv")
```

### 11.2.3. Sedimentation rate

```
plot(alb_Ti_track_comp1[,2],
     (100*(alb_Ti_track_comp1[,3]))/173,
     type="l",
     col="black",
     lwd= 2,
     xlab = "Depth adjusted (m)",
     ylab = "Sed rate (cm/kyr)",
     ylim = c(0.4,0.55)
     )

lines(alb_Si_track_comp1[,2],
      (100*(alb_Si_track_comp1[,3]))/173,
      col="red",
```

```

lwd=2
)

lines(alb_Al_track_comp1[,2],
      (100*(alb_Al_track_comp1[,3]))/173,
      col="green",
      lwd=2
)

lines(alb_K_track_comp1[,2],
      (100*(alb_K_track_comp1[,3]))/173,
      col="blue",
      lwd=2
)

lines(alb_K_track_comp1[,2],
      (alb_K_track_comp1[,3])-(alb_K_track_comp1[,3])+0.493,
      col="red",
      lwd=2,
      lty=3
)

legend("bottomleft",
      legend = c("Ti", "Si", "K", "Al", "ASM = 0.493 cm/kyr (theoretical)" ),
      col = c("black", "red", "blue", "green","red"),
      lty = c(1, 1, 1, 1, 3),
      lwd = c(2, 2, 2, 2, 2),
      pch = c(NA, NA, NA, NA),
      pt.cex = 2,
      bty = "n",          # No box around legend
      cex = 0.75)         # Larger legend text

```

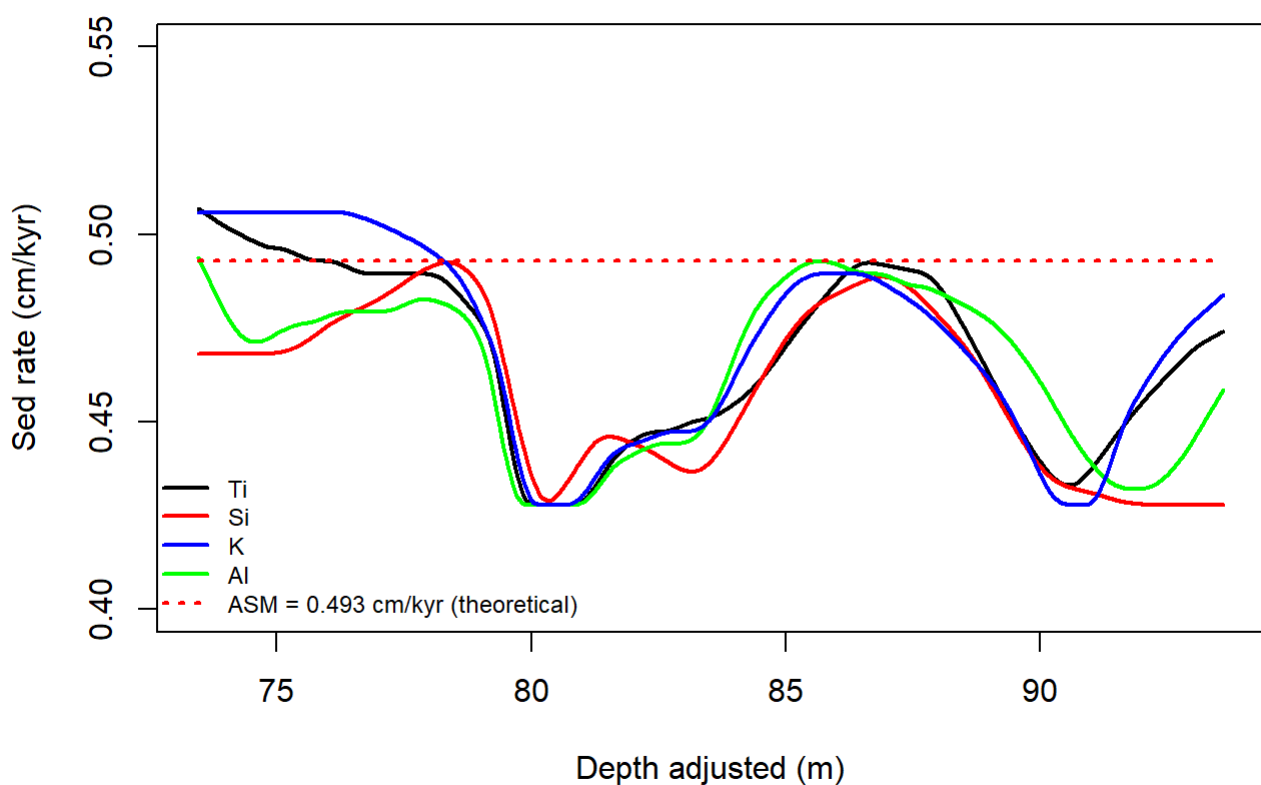

---

## Step 12: Astronomical Time Scale

This step is performed in Microsoft Excel. The ATS is presented in Supplementary Materials 6.

The built age-model data are set along the composite ACL-ACU core at the corresponding adjusted depth (from 73.452 to 93.609 m).

The data from 73.452 to 73.72 are overlapping with the one of Zhao et al (2022b).

From 62.111 m to 73.72 m the absolute age of Zhao et al (2022b) are used. The absolute age of  $499.9115 \pm 0.9$  Ma located at 73.72 m is used to anchor both ACU and ACL in time domain.

From 73.721 to 93.609 m, the time data used are from our newly built age-model.

---

## Step 13: Milankovitch filters of the 1 kyr resampled Miaolingian composite dataset

### 13.1. Creation of a “.csv” file

---

This step is conducted in Microsoft Excel.

The created file contains the Adjusted depth, the Time in kyr and the Ti Z-score values as follows:

AdjDepth; Time; Ti

62.111; 497083.4; 1.57549322

62.112; 497083.6; 1.10323208

62.113; 497083.7; 0.63097093

...; ...; ...

93.609; 504154.084; -0.5940352

93.610; 504154.296; -2.3646753

I called this file alb\_Ti\_Mia\_WR.csv as this includes all the Ti data for the entire Miaolingian Epoch recorded in the core tuned using the WaverideR age-depth model.

### 13.2. Reading of the file in R and resampling every 1 kyr of the time interval

---

```
alb_Ti_Mia <- read.csv("alb_Ti_Mia_WR.csv", sep=";")
alb_Ti_Mia <- cbind(alb_Ti_Mia$Time, alb_Ti_Mia$Ti)
alb_Ti_Mia <- na.omit(alb_Ti_Mia)
alb_Ti_Mia[!is.finite(alb_Ti_Mia)] <- NA
alb_Ti_Mia <- na.omit(alb_Ti_Mia)
```

```
MIA<- iso(dat=alb_Ti_Mia, xmin=497000, xmax=505000)
```

----- ISOLATE STRATIGRAPHIC DATA BY LOCATION -----

```
* Number of data points= 30577
* Number of columns= 2
* Minimum= 497083.4 , Maximum= 504197.4
* Isolating data between 497000 and 505000
* Number of data points following culling= 30577
```

**Stratigraphic Series**

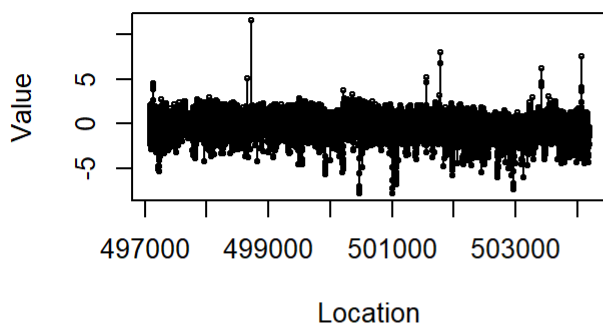

**Distribution of Isolated Values**

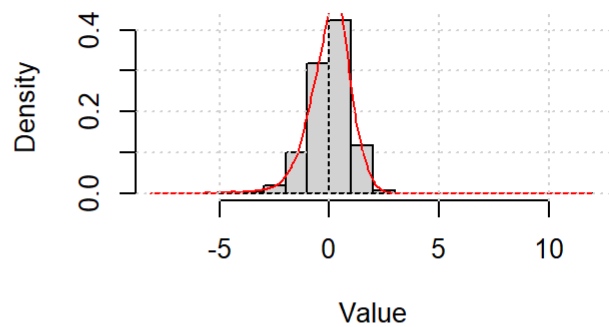

**Boxplot for Isolated Values**

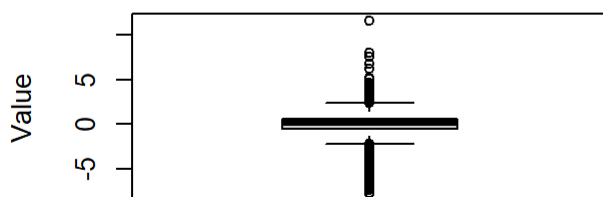

**Normal Q-Q Plot**

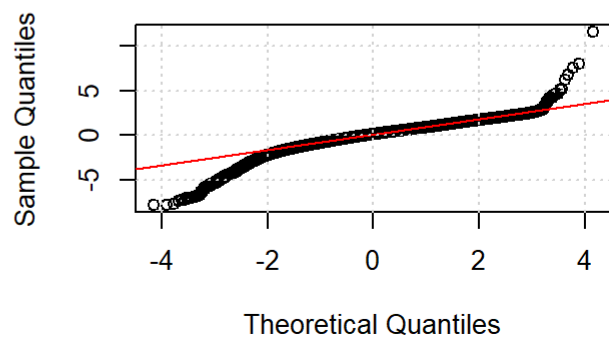

```
MIA <- linterp(MIA,dt=1, genplot=T)
```

----- APPLYING PIECEWISE-LINEAR INTERPOLATION TO STRATIGRAPHIC SERIES -----

```
* Number of samples= 30577
* New number of samples= 7115
```

**Raw (black) and Interpolated (red) Data**

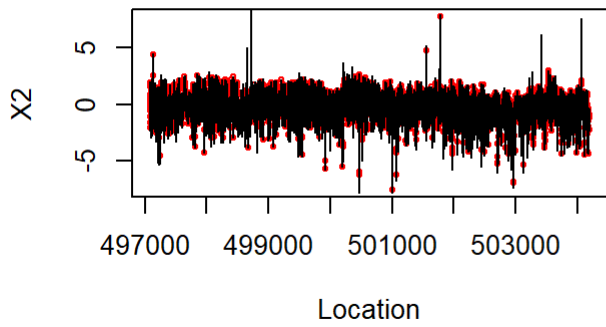

**Distribution of Interpolated Values**

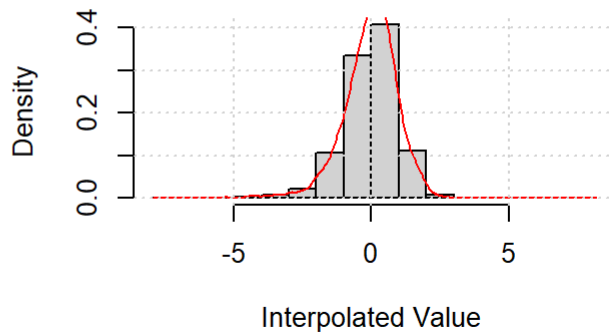

**Boxplot of Interpolated Values**

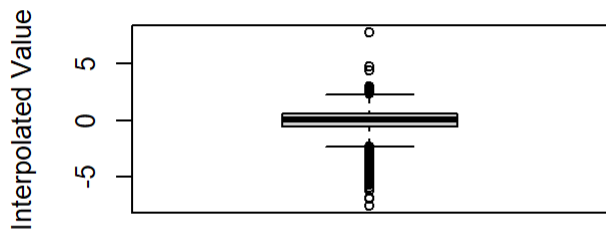

**Normal Q-Q Plot**

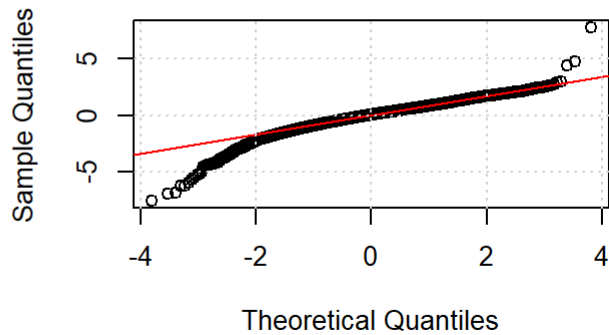

```
MIA_Ti_tuned <- linterp(MIA, genplot=T)
```

----- APPLYING PIECEWISE-LINEAR INTERPOLATION TO STRATIGRAPHIC SERIES -----

- \* Number of samples= 7115
- \* Determining median sampling interval for series
- \* Will interpolate to median sampling interval of 1
- \* New number of samples= 7115



**Raw (black) and Interpolated (red) Data**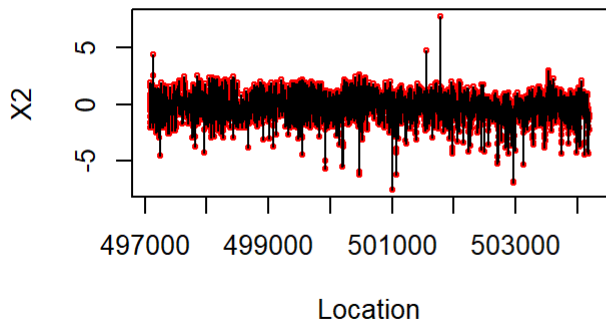**Distribution of Interpolated Values****Boxplot of Interpolated Values**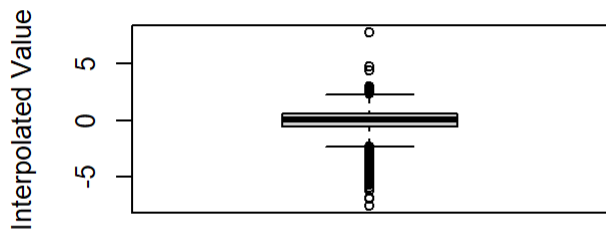**Normal Q-Q Plot**

### 13.3. Resampling every 1 kyr and Milankovitch filters

```
#Resampling every 1 kyr
MIA<- iso(dat=alb_Ti_Mia, xmin=497000, xmax=505000)
```

----- ISOLATE STRATIGRAPHIC DATA BY LOCATION -----

- \* Number of data points= 30577
- \* Number of columns= 2
- \* Minimum= 497083.4 , Maximum= 504197.4
- \* Isolating data between 497000 and 505000
- \* Number of data points following culling= 30577

**Stratigraphic Series**

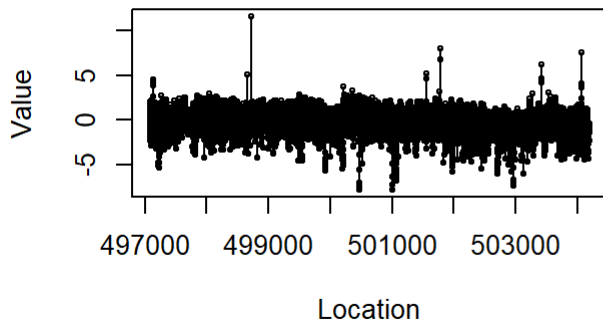

**Distribution of Isolated Values**

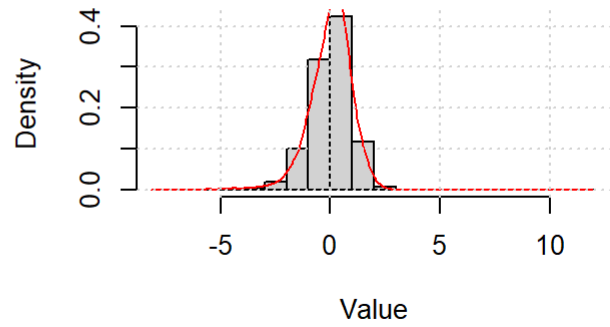

**Boxplot for Isolated Values**

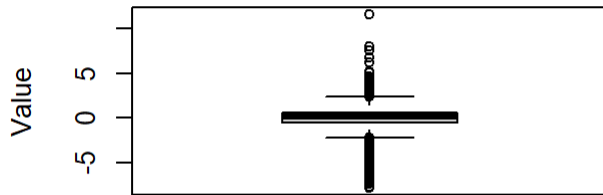

**Normal Q-Q Plot**

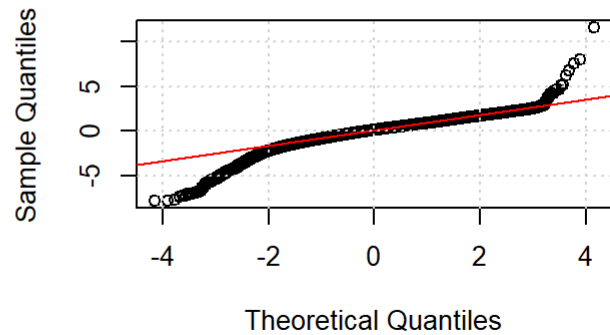

```
MIA <- linterp(MIA,dt=1, genplot=T)
```

----- APPLYING PIECEWISE-LINEAR INTERPOLATION TO STRATIGRAPHIC SERIES -----

\* Number of samples= 30577

\* New number of samples= 7115

**Raw (black) and Interpolated (red) Data**



**Distribution of Interpolated Values**



**Boxplot of Interpolated Values**



**Normal Q-Q Plot**

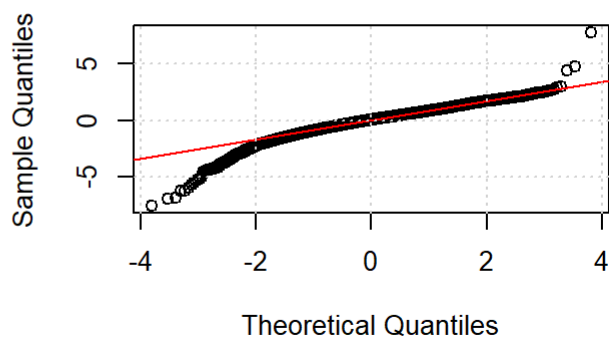

```
MIA_Ti_tuned <- linterp(MIA, genplot=T)
```

----- APPLYING PIECEWISE-LINEAR INTERPOLATION TO STRATIGRAPHIC SERIES -----

- \* Number of samples= 7115
- \* Determining median sampling interval for series
- \* Will interpolate to median sampling interval of 1
- \* New number of samples= 7115

**Raw (black) and Interpolated (red) Data**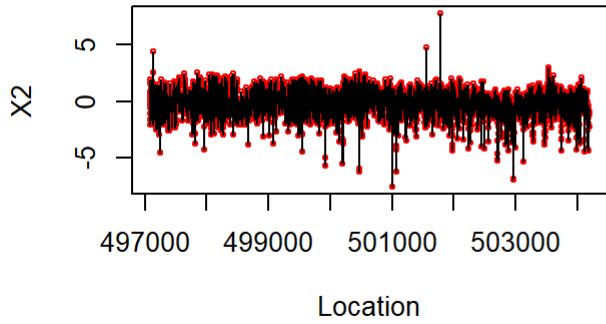**Distribution of Interpolated Values**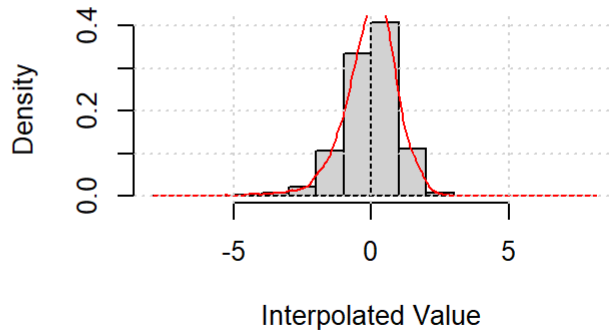**Boxplot of Interpolated Values**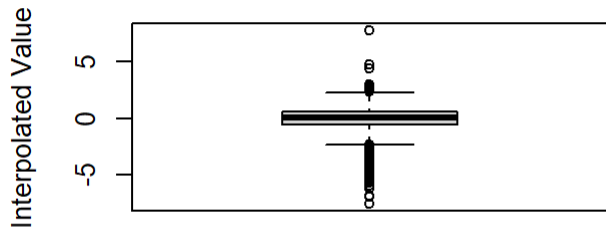**Normal Q-Q Plot**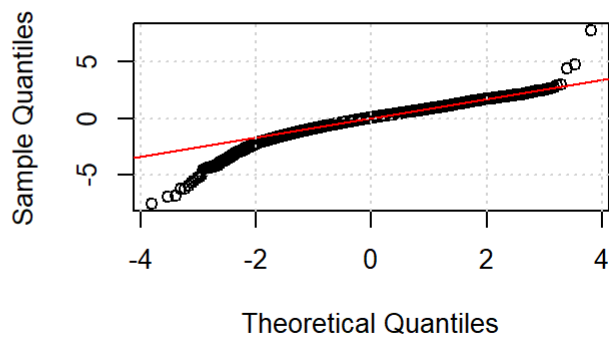

```
#Filter out the long eccentricity cycle
MIA_Ti_405 <- taner(MIA_Ti_tuned,xmax=0.01, fhigh=1/450, flow=1/350, demean = T)
```

----- TANER BANDPASS FILTERING STRATIGRAPHIC SERIES-----

- \* Number of data points= 7115
- \* Sample interval= 1
- \* Mean value removed= -0.03173093

**Stratigraphic Series**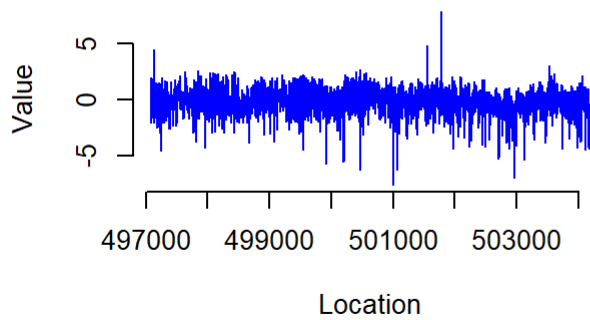**Amplitude**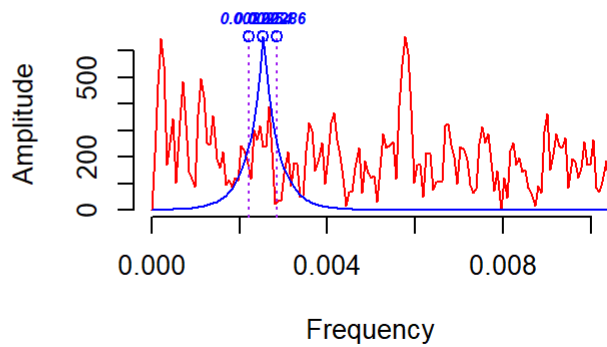**Bandpassed Signal**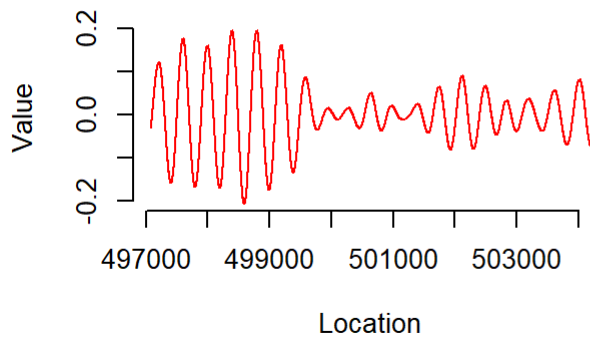**Comparison**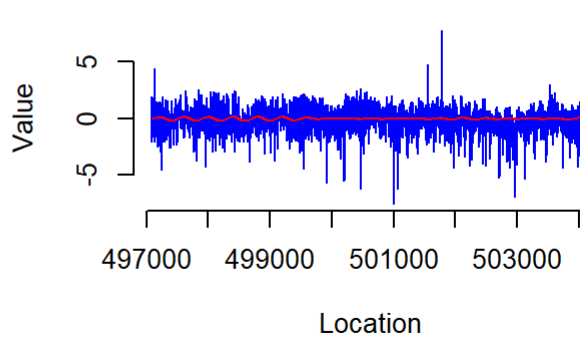

```
#Filter out the 173-kyr obliquity cycle
MIA_Ti_173 <- taner(MIA_Ti_tuned, xmax=0.01, fhigh=1/193, flow=1/150, demean=T)
```

----- TANER BANDPASS FILTERING STRATIGRAPHIC SERIES-----

- \* Number of data points= 7115
- \* Sample interval= 1
- \* Mean value removed= -0.03173093

### Stratigraphic Series



### Amplitude

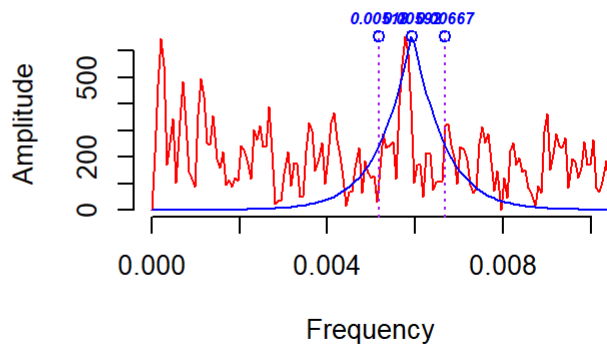

### Bandpassed Signal

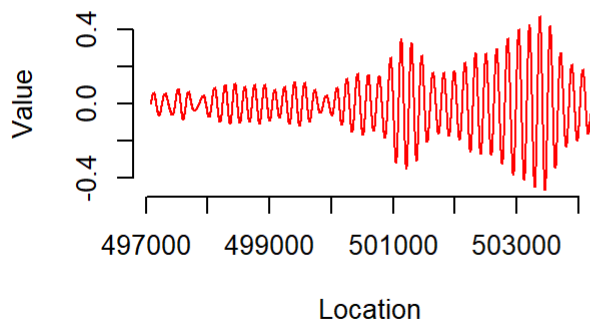

### Comparison

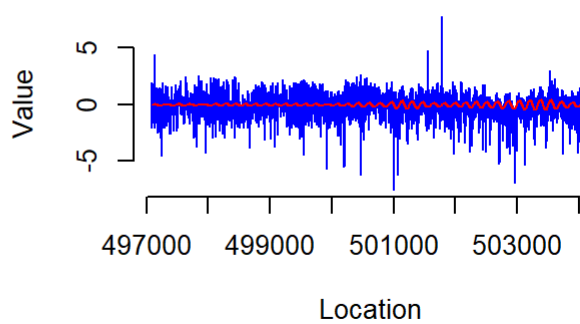

```
#Filter out the short eccentricity cycle  
MIA_Ti_100 <- taner(MIA_Ti_tuned, xmax=0.02, fhigh=1/85, flow=1/140, demean = T)
```

----- TANER BANDPASS FILTERING STRATIGRAPHIC SERIES-----

- \* Number of data points= 7115
- \* Sample interval= 1
- \* Mean value removed= -0.03173093

### Stratigraphic Series

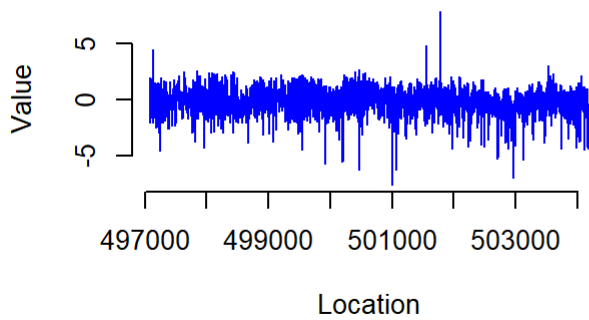

### Amplitude

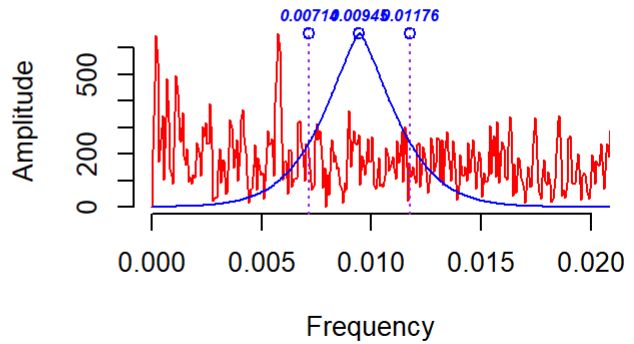

### Bandpassed Signal

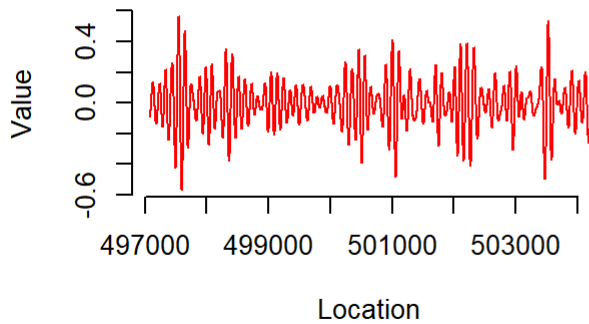

### Comparison

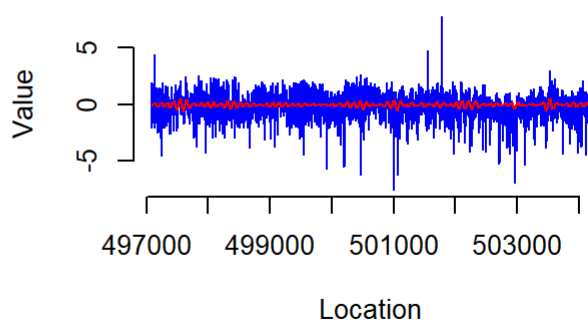

```
#Filter out the obliquity cycle  
MIA_Ti_31 <- taner(MIA_Ti_tuned, xmax=0.05, fhigh=1/27, flow=1/40, demean=T)
```

----- TANER BANDPASS FILTERING STRATIGRAPHIC SERIES-----

- \* Number of data points= 7115
- \* Sample interval= 1
- \* Mean value removed= -0.03173093

### Stratigraphic Series

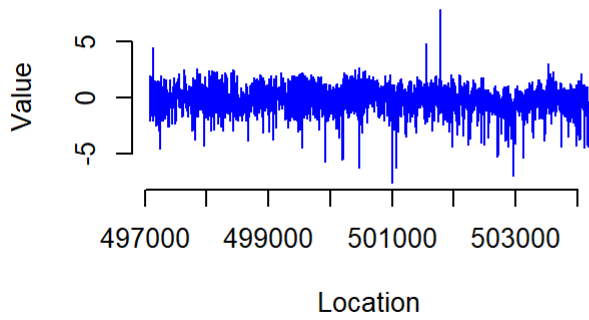

### Amplitude

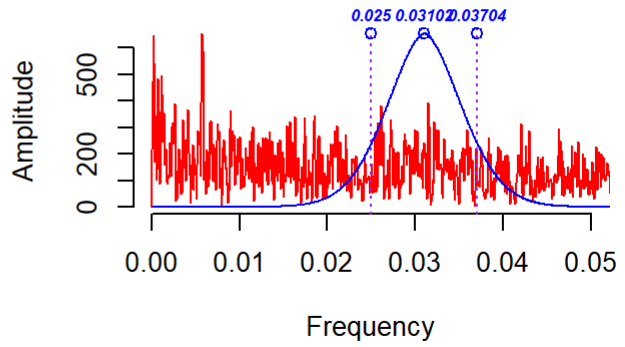

### Bandpassed Signal

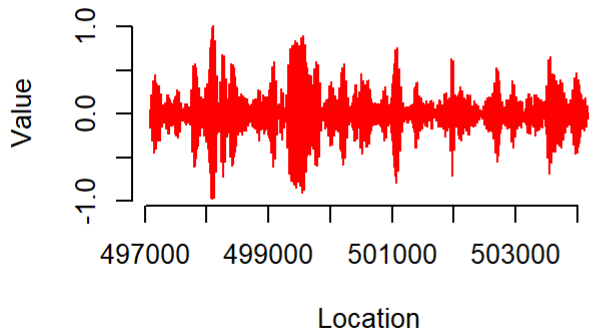

### Comparison

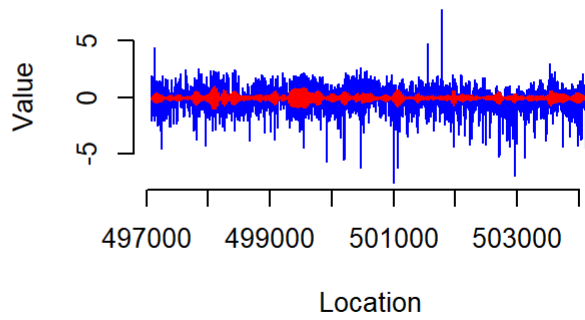

```
#Filter out the precession cycle  
MIA_Ti_20 <- taner(MIA_Ti_tuned,xmax=0.07, fhigh=1/15, flow=1/21, demean=T)
```

----- TANER BANDPASS FILTERING STRATIGRAPHIC SERIES-----

- \* Number of data points= 7115
- \* Sample interval= 1
- \* Mean value removed= -0.03173093



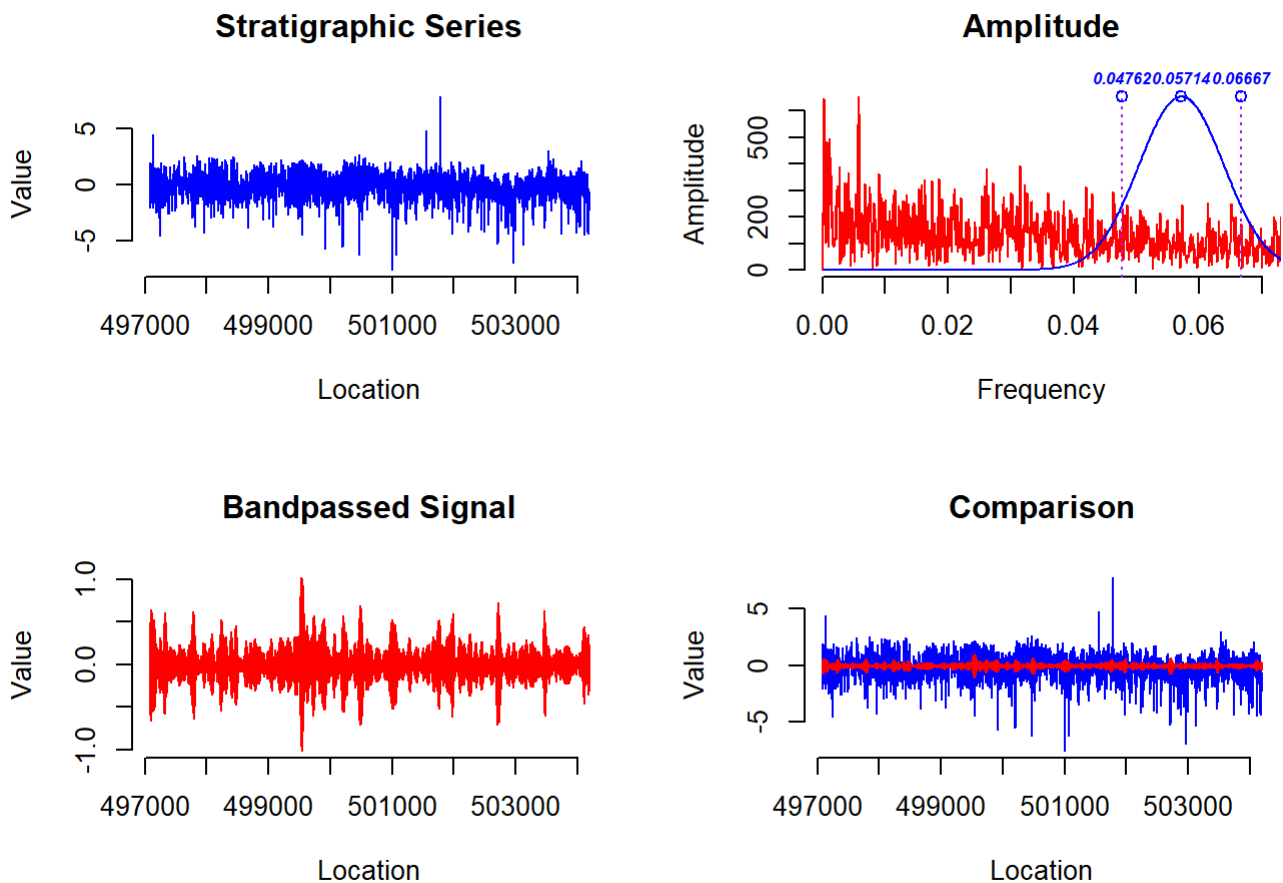

```
#Saving of the filtered Milankovitch periodicities
#write.csv(MIA_Ti_tuned,"MIA_WR_rsp_1kyr.csv")
#write.csv(MIA_Ti_405,"MIA_WR_405_rsp_1kyr.csv")
#write.csv(MIA_Ti_173,"MIA_WR_173_rsp_1kyr.csv")
#write.csv(MIA_Ti_100,"MIA_WR_100_rsp_1kyr.csv")
#write.csv(MIA_Ti_31,"MIA_WR_31_rsp_1kyr.csv")
#write.csv(MIA_Ti_20,"MIA_WR_20_rsp_1kyr.csv")
```

## Step 14: Lag-1 autocorrelation of the Miaolingian Series

### 14.1. Resampling of the dataset every 5 kyr

```
alb_Ti_Mia <- read.csv("alb_Ti_Mia_WR.csv",sep=";")
alb_Ti_Mia <- cbind(alb_Ti_Mia$Time,alb_Ti_Mia$Ti)
alb_Ti_Mia <- na.omit(alb_Ti_Mia)
alb_Ti_Mia[!is.finite(alb_Ti_Mia)] <- NA
alb_Ti_Mia <- na.omit(alb_Ti_Mia)

MIA<- iso(dat=alb_Ti_Mia, xmin=497000, xmax=505000)
```

----- ISOLATE STRATIGRAPHIC DATA BY LOCATION -----

```
* Number of data points= 30577
* Number of columns= 2
* Minimum= 497083.4 , Maximum= 504197.4
```

\* Isolating data between 497000 and 505000

\* Number of data points following culling= 30577

**Stratigraphic Series**

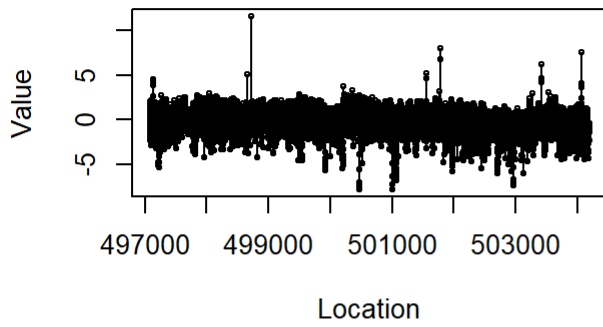

**Distribution of Isolated Values**

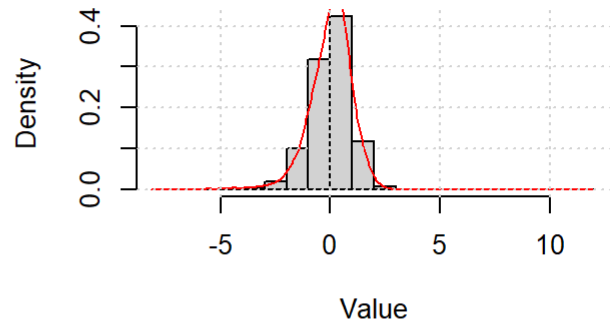

**Boxplot for Isolated Values**

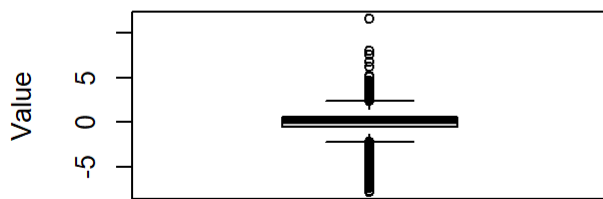

**Normal Q-Q Plot**

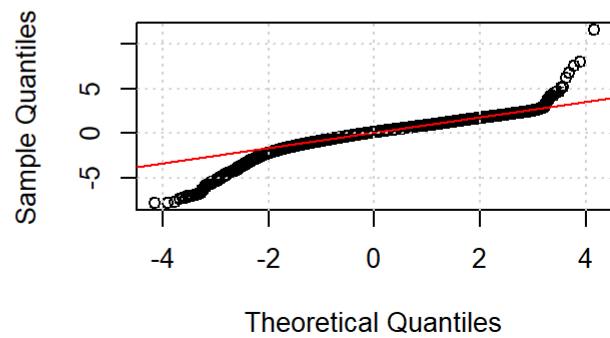

```
MIA <- linterp(MIA,dt=5, genplot=T)
```

----- APPLYING PIECEWISE-LINEAR INTERPOLATION TO STRATIGRAPHIC SERIES -----

\* Number of samples= 30577

\* New number of samples= 1423

**Raw (black) and Interpolated (red) Data**

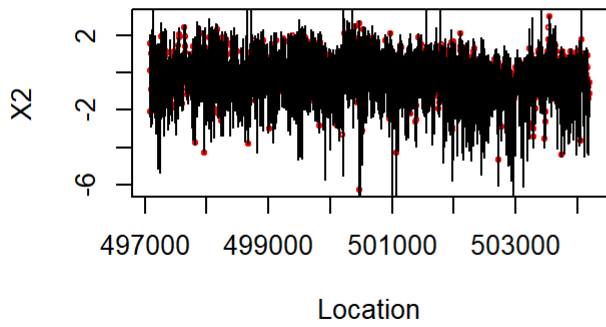

**Distribution of Interpolated Values**

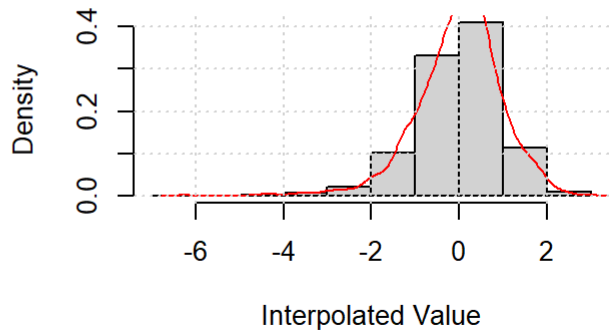

**Boxplot of Interpolated Values**

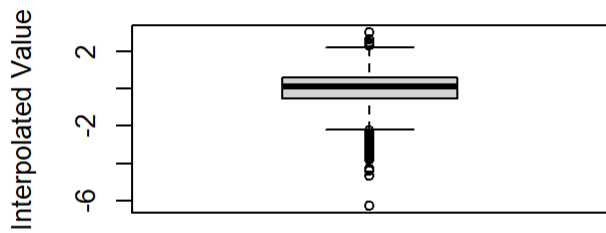

**Normal Q-Q Plot**

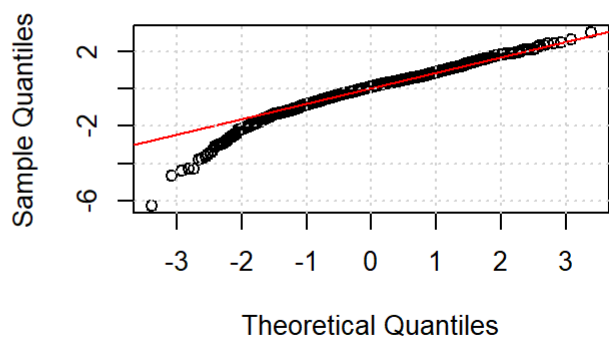

```
MIA_Ti_tuned <- linterp(MIA, genplot=T)
```

----- APPLYING PIECEWISE-LINEAR INTERPOLATION TO STRATIGRAPHIC SERIES -----

- \* Number of samples= 1423
- \* Determining median sampling interval for series
- \* Will interpolate to median sampling interval of 5
- \* New number of samples= 1423

**Raw (black) and Interpolated (red) Data**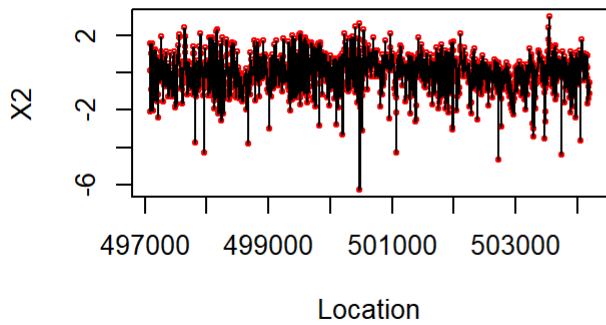**Distribution of Interpolated Values****Boxplot of Interpolated Values**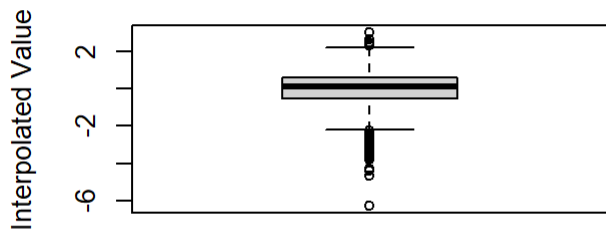**Normal Q-Q Plot**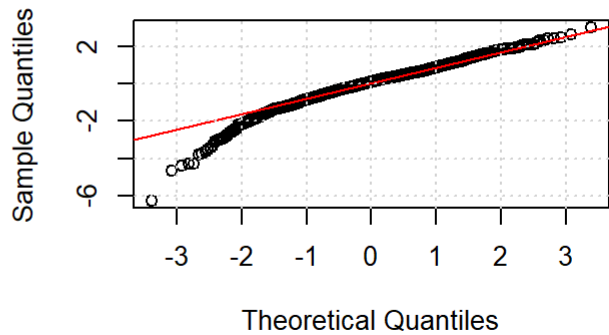

## 14.2. Lag-1 autocorrelation

Lag-1 window set from 20 to 90 kyr to avoid the 5-20 kyr high frequency noise and limit to 90 kyr that correspond to the lower boundary of the short eccentricity band

```
win_min <- 20
win_max <- 90
n_sim <- 100
dat <- data.frame(MIA_Ti_tuned)
dt2 <- dat[2, 1] - dat[1, 1]
dat <- dat[order(dat[, 1], na.last = NA, decreasing = F), ]
npts <- length(dat[, 1])
start <- dat[1, 1]
end <- dat[length(dat[, 1]), 1]
x1 <- dat[1:(npts - 1), 1]
x2 <- dat[2:(npts), 1]
dx = x2 - x1
dt = mean(dx)
sdt = sd(dx)
xout <- seq(start, end, by = dt)
npts <- length(xout)
interp <- approx(dat[, 1], dat[, 2], xout, method = "linear", n = npts)
d <- as.data.frame(interp)
mat_sim <- matrix(data = NA,
                  nrow = nrow(d),
                  ncol = n_sim)

xout_vals <- d[, 1]
i <- 1
```

```

npts <- length(xout_vals)
new_sampling_rate <- NULL

fit <- for(i in 1:n_sim){

  if (sdt == 0) {
    new_sampling_rate <- runif(n=1, min = dt, max = win_min)}
  else if ((dt - (2 * sdt)) > 0) {
    new_sampling_rate <- truncnorm::rtruncnorm(
      n = 1,
      a = dt - 2 * sdt,
      b = dt + (2 * sdt),
      mean = dt,
      sd = sdt
    )}else {
    new_sampling_rate <- truncnorm::rtruncnorm(
      n = 1,
      a = dt / 2,
      b = dt + (2 * sdt),
      mean = dt,
      sd = sdt
    )
  }

  win_size <- stats::runif(n = 1,
                           min = min(c(win_min, win_max)),
                           max = max(c(win_min, win_max)))

  dt_new <- new_sampling_rate

  xout_new <- seq(from = start, to = end, by = dt_new)

  npts_new <- length(xout_new)

  interp_new <- approx(dat[, 1],
                      dat[, 2],
                      xout_new,
                      method = "linear",
                      n = npts
                    )

  d_new <- as.data.frame(interp_new)
  d_new[, 3] <- NA
  for (k in 1:nrow(d_new)) {
    row_nr_1 <- DescTools::Closest(d_new[, 1],
                                   d_new[k, 1] - (win_size / 2),
                                   which = TRUE)
    row_nr_2 <- DescTools::Closest(d_new[, 1],
                                   d_new[k, 1] + (win_size / 2),
                                   which = TRUE)
    data_sel <- d_new[row_nr_1[1]:row_nr_2[1], ]
    corr <- acf(data_sel[, 2], plot = F)
    a <- as.numeric(unlist(corr[1]))[1])
    d_new[k, 3] <- a
  }
}

```

```

}
yleft_comp <- d_new[1, 3]
yright_com <- d_new[nrow(d_new), 3]
app <- approx(
  d_new[, 1],
  d_new[, 3],
  xout_vals,
  method = "linear",
  n = npts,
  yleft = yleft_comp,
  yright = yright_com
)
app_res <- cbind(app$y)
app_res_norm <- (app_res - min(app_res, na.rm = TRUE)) /
  (max(app_res, na.rm = TRUE) - min(app_res, na.rm = TRUE))
mat_sim[,i] <- app_res_norm
}

mat_sim_mean <- rowMeans(mat_sim)
mat_sim_sd <- rowSds(mat_sim)
results <- cbind(xout_vals, mat_sim_mean, mat_sim_sd)

lag_1 <- results

```

```

plot(lag_1,
  type = "l",
  main = "Lag 1 over time",
  xlab = "Age Before Present (kyr)",
  ylab = "Lag 1 power"
)

```

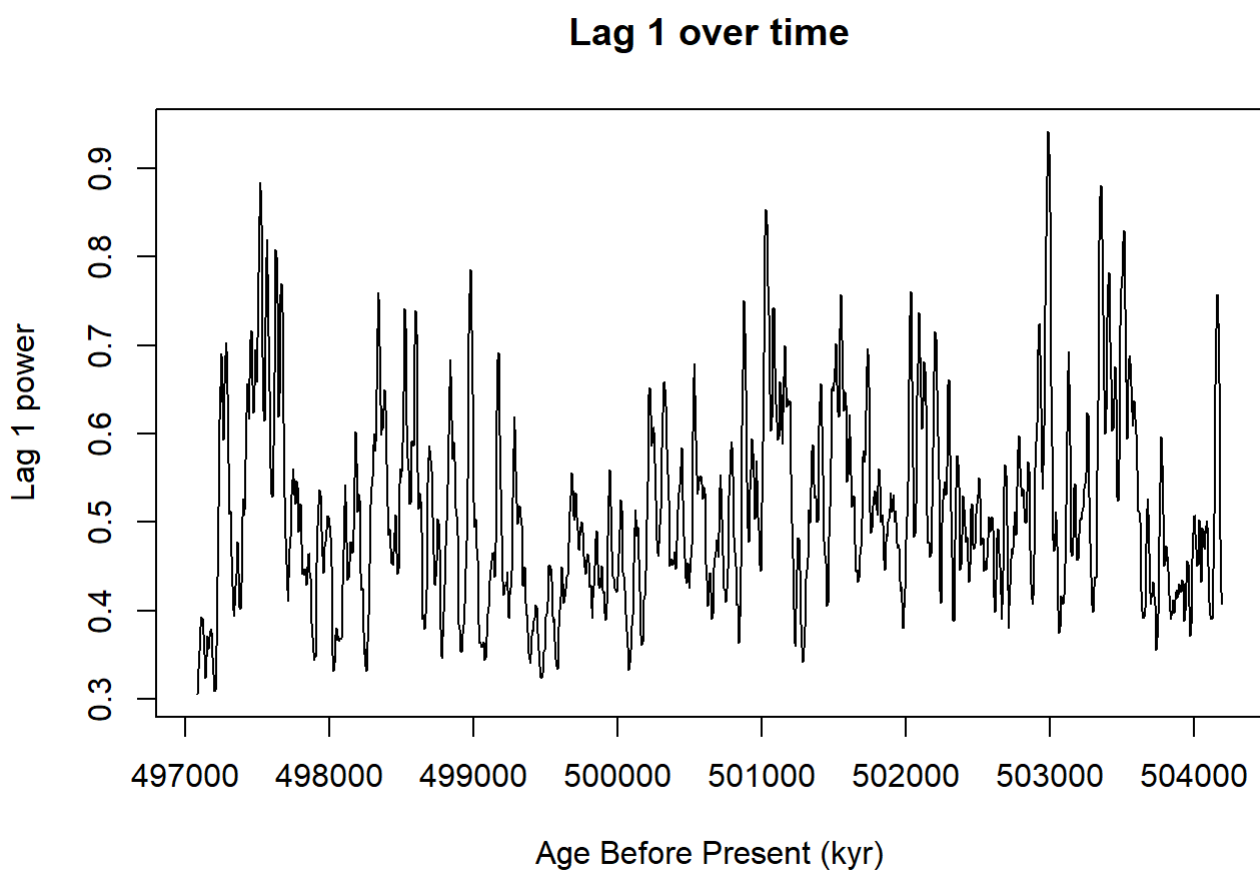

```
# write.csv(lag_1,"lag1-rsp5kyr-window20-90kyr.csv")
```

## 14.3. Filtering of the Milankovitch cycles and comparison with lag-1 results

```
MIA_Ti_405 <- taner(MIA_Ti_tuned[,c(1,2)],flow=1/350,fhigh=1/450,roll=10^20,xmax=1/50)
```

----- TANER BANDPASS FILTERING STRATIGRAPHIC SERIES-----

- \* Number of data points= 1423
- \* Sample interval= 5
- \* Mean value removed= -0.00624567

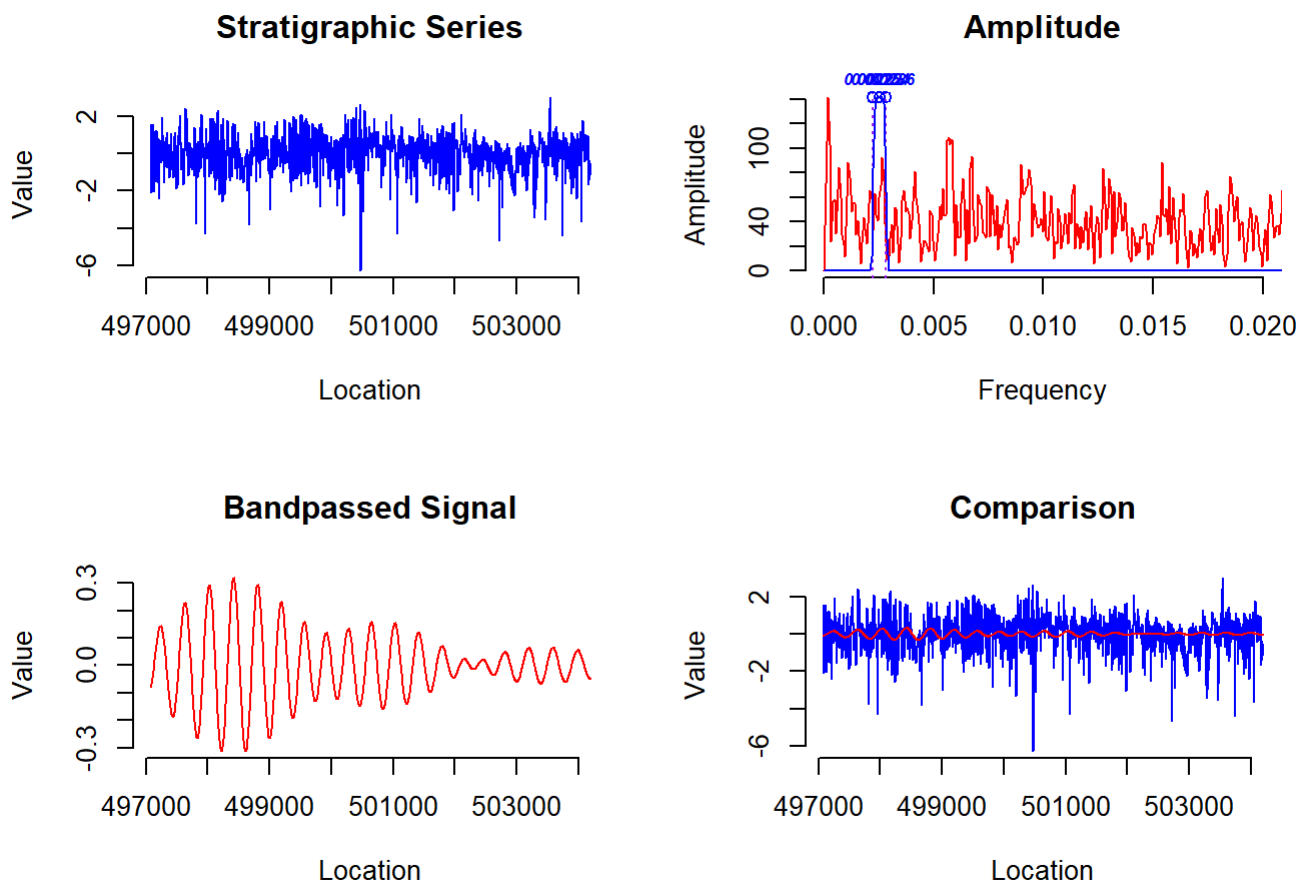

```
MIA_Ti_173<- taner(MIA_Ti_tuned[,c(1,2)],flow=1/150,fhigh=1/193,roll=10^20,xmax=1/50)
```

----- TANER BANDPASS FILTERING STRATIGRAPHIC SERIES-----

- \* Number of data points= 1423
- \* Sample interval= 5
- \* Mean value removed= -0.00624567

**Stratigraphic Series**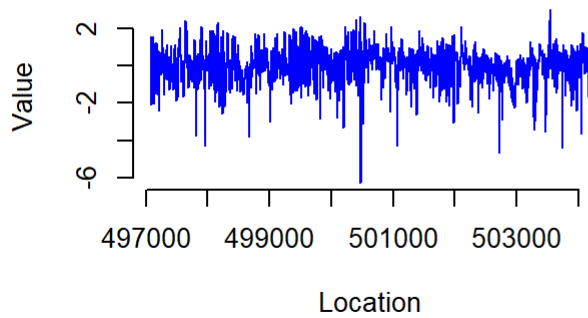**Amplitude**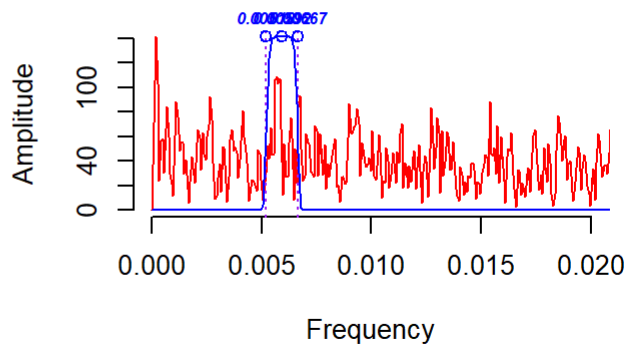**Bandpassed Signal**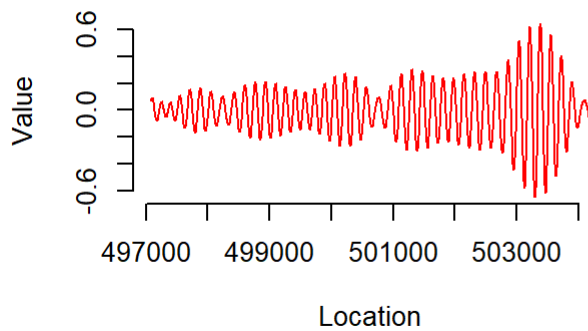**Comparison**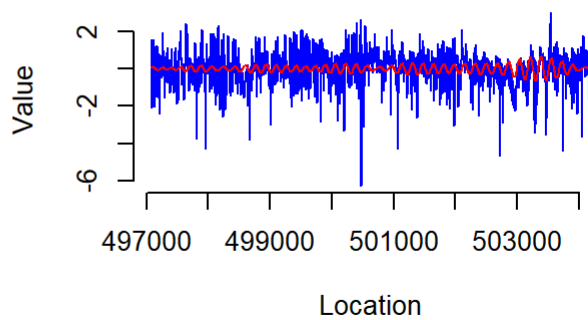

```
MIA_Ti__100<- taner(MIA_Ti_tuned[,c(1,2)],flow=1/140,fhigh=1/85,roll=10^20,xmax=1/50)
```

----- TANER BANDPASS FILTERING STRATIGRAPHIC SERIES-----

- \* Number of data points= 1423
- \* Sample interval= 5
- \* Mean value removed= -0.00624567



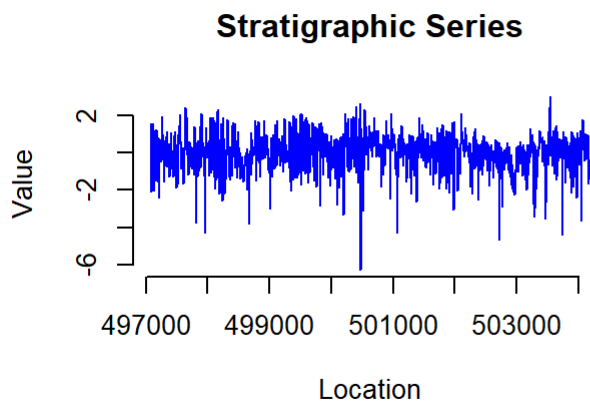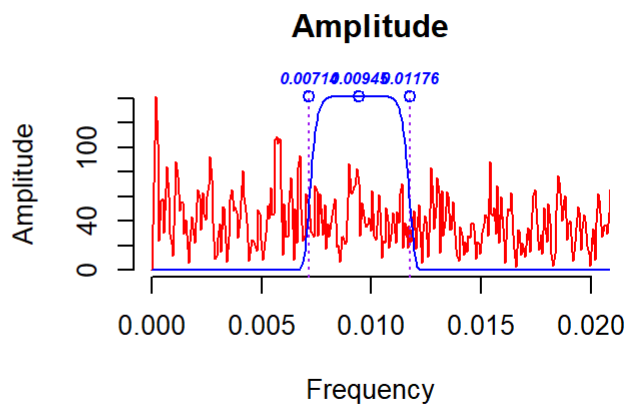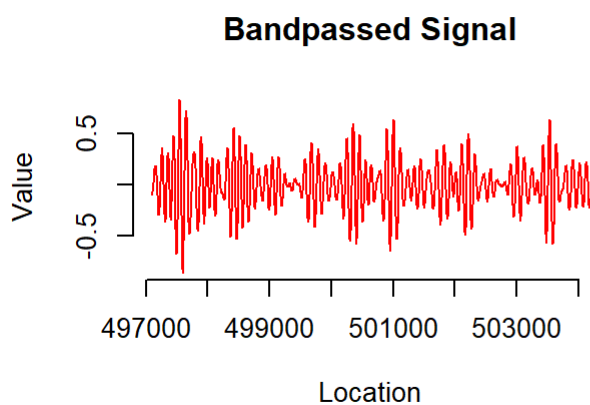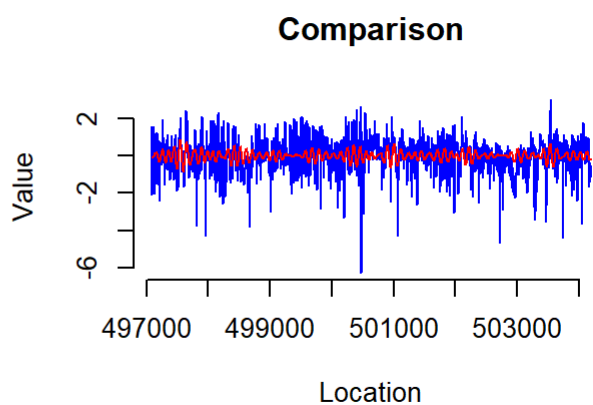

```
MIA_Ti__31 <- taner(MIA_Ti_tuned[,c(1,2)],flow=1/27,fhigh=1/40,roll=10^20,xmax=1/50)
```

----- TANER BANDPASS FILTERING STRATIGRAPHIC SERIES-----

- \* Number of data points= 1423
- \* Sample interval= 5
- \* Mean value removed= -0.00624567

**Stratigraphic Series**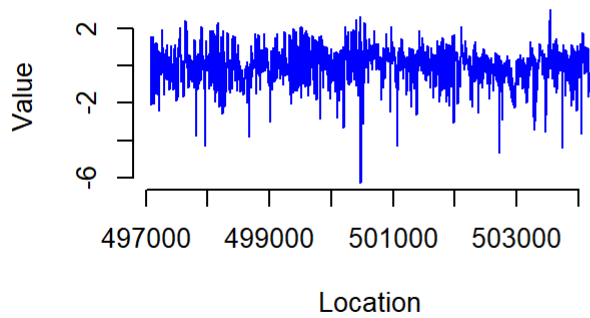**Amplitude**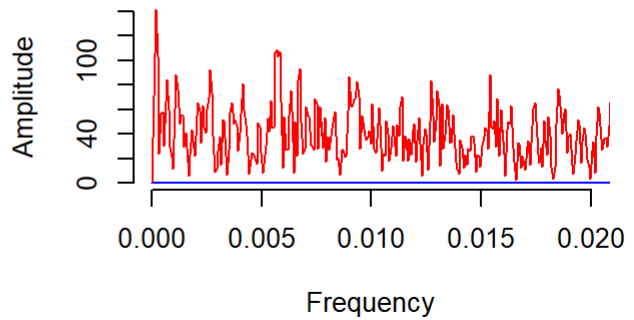**Bandpassed Signal**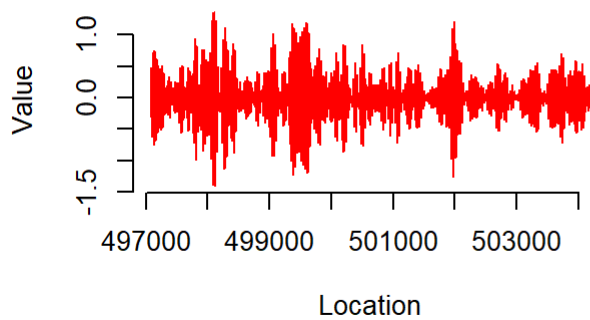**Comparison**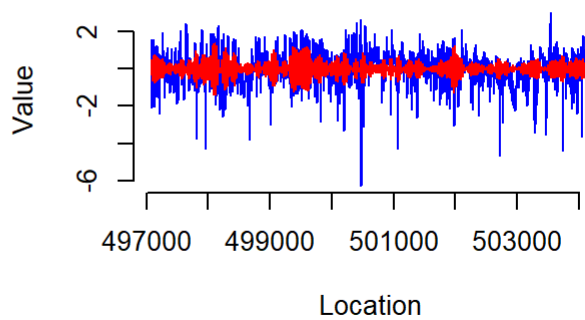

```
lag_1_background<- taner(lag_1[,c(1,2)],flow=1/500,fhigh=0,roll=10^20,xmax=1/50)
```

----- TANER BANDPASS FILTERING STRATIGRAPHIC SERIES-----

- \* Number of data points= 1423
- \* Sample interval= 5
- \* Mean value removed= 0.5138215

**Stratigraphic Series**

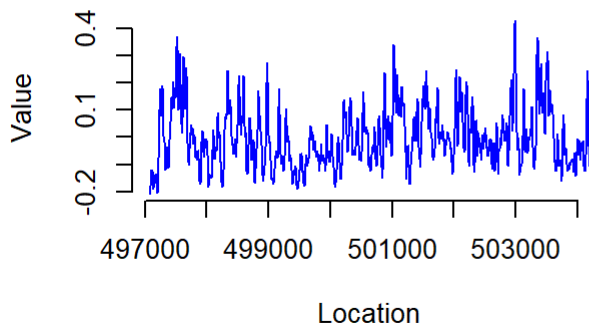

**Amplitude**

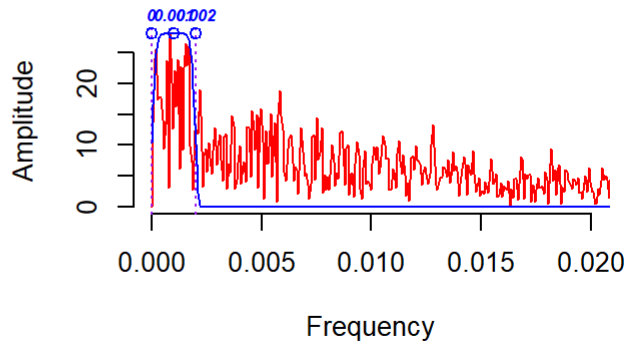

**Bandpassed Signal**

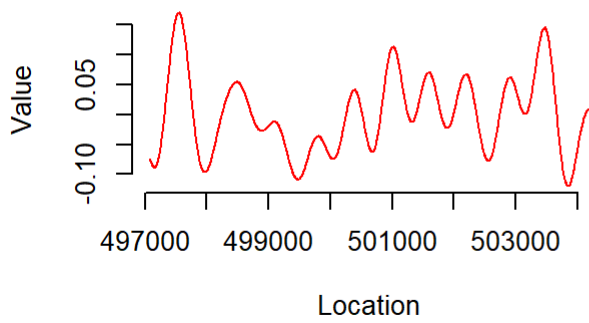

**Comparison**

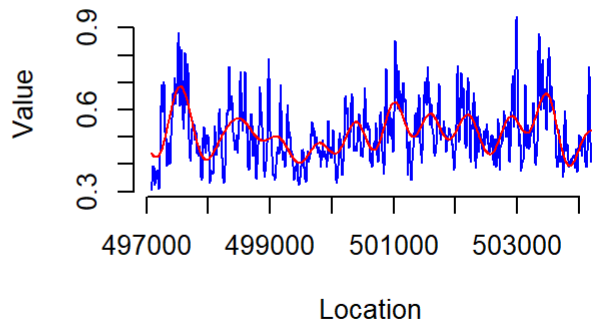

```
MIA_Ti__405_hilbert <- hilbert(MIA_Ti__405)
```

----- PERFORMING HILBERT TRANSFORM ON STRATIGRAPHIC SERIES -----

- \* Number of data points= 1423
- \* Sample interval= 5
- \* Mean value removed= -0.005499469

**Amplitude Spectrum for Data**

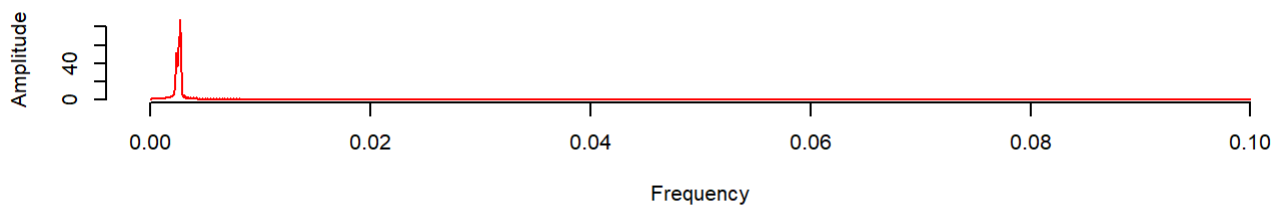

**Instantaneous Amplitude**

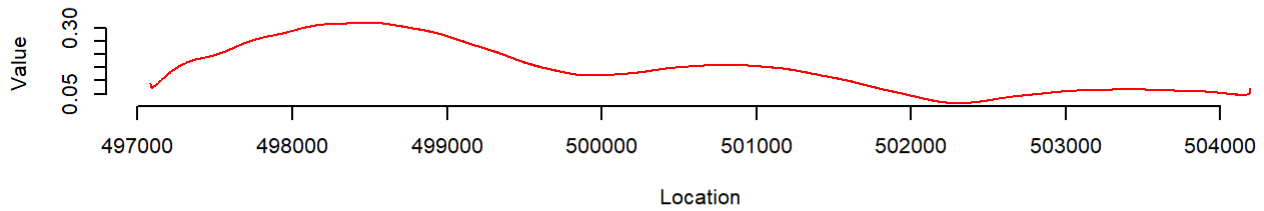

**Comparison**

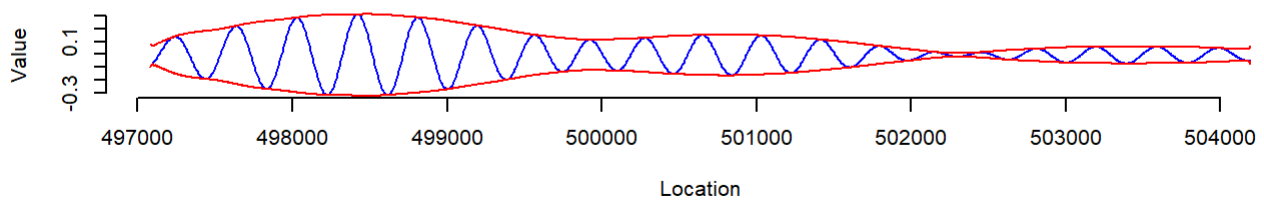

```
MIA_Ti_173_hilbert <- hilbert(MIA_Ti_173)
```

----- PERFORMING HILBERT TRANSFORM ON STRATIGRAPHIC SERIES -----

- \* Number of data points= 1423
- \* Sample interval= 5
- \* Mean value removed= -0.005971174

**Amplitude Spectrum for Data**

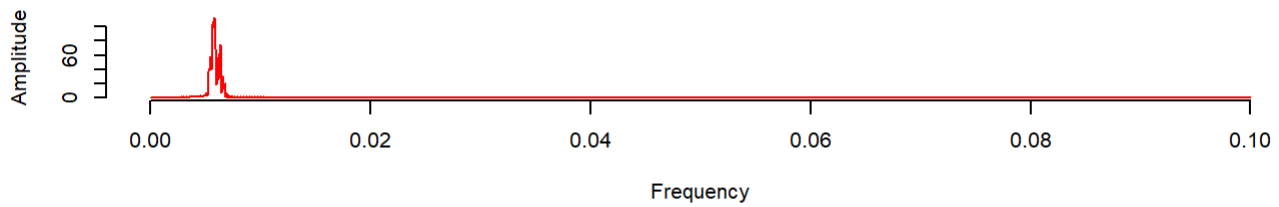

**Instantaneous Amplitude**

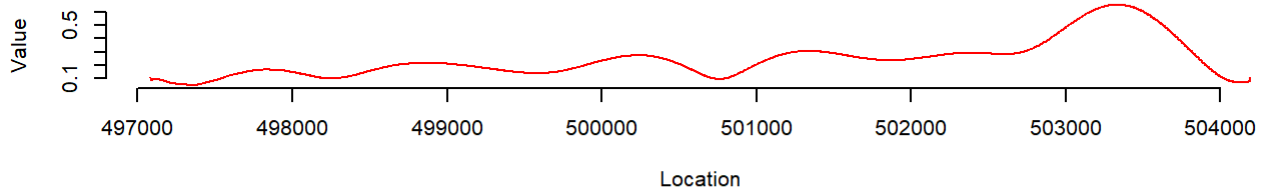

**Comparison**

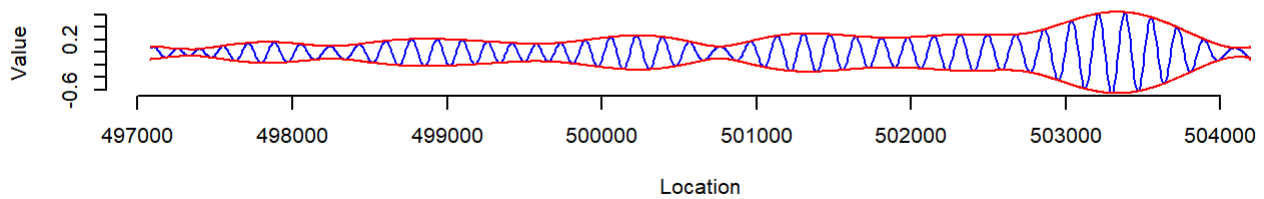

```
MIA_Ti_100_hilbert <- hilbert(MIA_Ti_100)
```

----- PERFORMING HILBERT TRANSFORM ON STRATIGRAPHIC SERIES -----

- \* Number of data points= 1423
- \* Sample interval= 5
- \* Mean value removed= -0.006772776

**Amplitude Spectrum for Data**

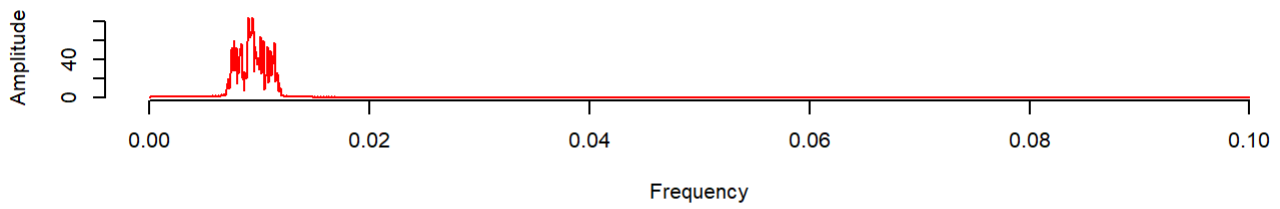

**Instantaneous Amplitude**

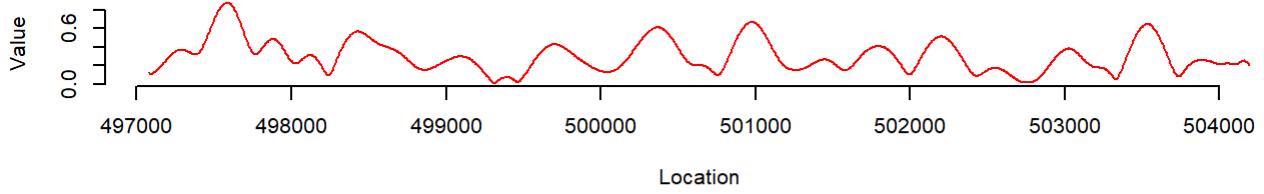

**Comparison**

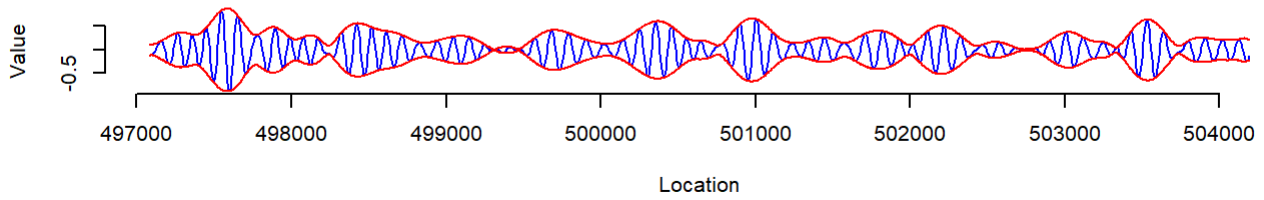

```
MIA_Ti__31_hilbert <- hilbert(MIA_Ti__31)
```

----- PERFORMING HILBERT TRANSFORM ON STRATIGRAPHIC SERIES -----

- \* Number of data points= 1423
- \* Sample interval= 5
- \* Mean value removed= -0.006150106

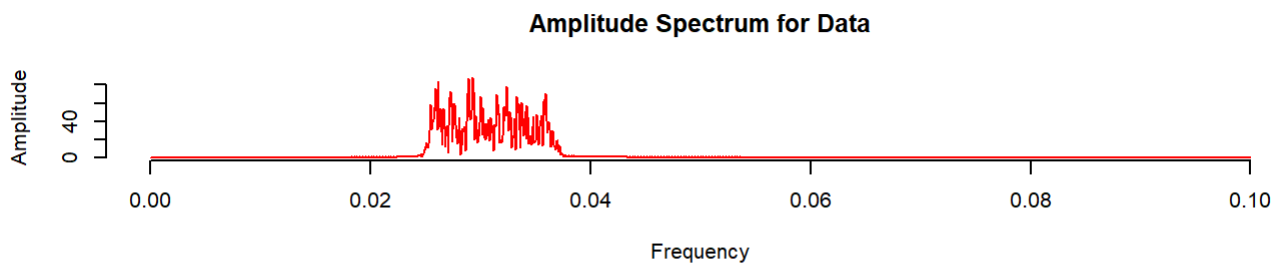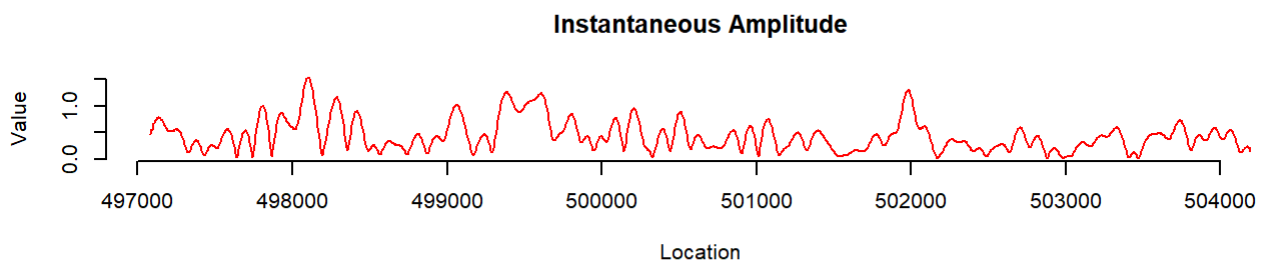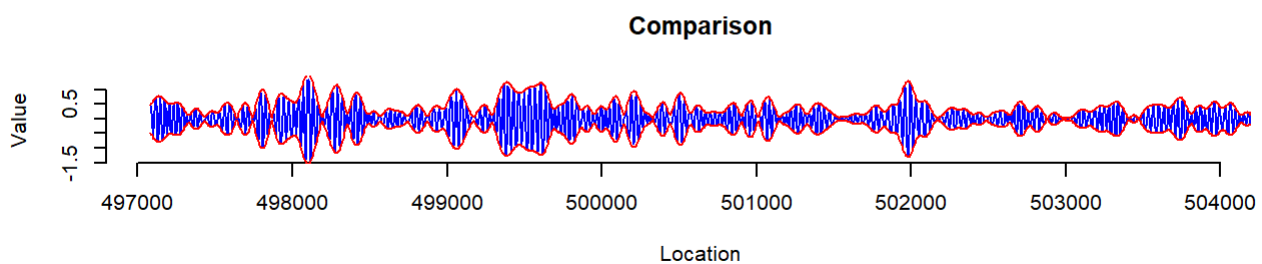

```
#Creation of a matrix to display the lag 1 results and the Milankovitch filters
#in one single figure
layout.matrix <- matrix(c(1,2,3,4,5), nrow = 5, ncol = 1)
graphics::layout(mat = layout.matrix,
heights = c(1), widths = c(1))

#Lag 1 results
par(mar = c(0,3,2,1))

plot(lag_1[,c(1,2)],
     type="l",
     ylab="",
     xlab = "",
     ylim=c(0.3,0.9),
     bty = "n",
     yaxt = "n",
     xaxt = "n"
)

axis(2, seq(from = 0.3, to = 0.9, by = 0.2), cex.axis = 0.5, las = 1)

title(ylab="Lag 1 power", line=2.2, cex.lab=0.75)

title(main = "Lag 1 and sea level trend", line=0, cex.main=0.75)

lines(lag_1_background[,1],(lag_1_background[,2]),col="blue", lwd=1.5)

# 405 kyr cycle and envelope
par(mar = c(0,3,0,1))
```

```

plot(MIA_Ti__405_hilbert[,1],
     (MIA_Ti__405_hilbert[,2]),
     type = "l",
     col="red",
     lwd=1.5,
     ylim = c(-0.6,0.6),
     xlab = "",
     ylab = "",
     xaxt = "n",
     yaxt = "n",
     bty = "n"
)

lines(MIA_Ti__405[,1],(MIA_Ti__405[,2]),col="grey", lwd=0.5)

axis(2, seq(from = -0.3, to = 0.3, by = 0.3), cex.axis = 0.5, las=1)

title(ylab="filter output", line=2.2, cex.lab=0.75)

title(main = "405 kyr cycle and envelope", line=-2.5, cex.main=0.75)

#173 kyr cycle and envelope
par(mar = c(0,3,0,1))

plot(MIA_Ti__173_hilbert[,1],
     (MIA_Ti__173_hilbert[,2]),
     col="purple",
     lwd=1.5,
     type = "l",
     ylab = "",
     xlab = "",
     yaxt = "n",
     xaxt = "n",
     bty = "n",
     ylim = c(-0.6,0.7)
)

lines(MIA_Ti__173[,1],
     (MIA_Ti__173[,2]-mean(MIA_Ti__173[,2])),
     col="grey",
     lwd=0.5
)

axis(2, seq(from = -0.6, to = 0.6, by = 0.3), cex.axis = 0.5, las=1)

title(ylab="filter output", line=2.2, cex.lab=0.75)

title(main = "173 kyr cycle and envelope", line=-2, cex.main=0.75)

#100 kyr cycle and envelope
par(mar = c(0,3,0,1))

plot(MIA_Ti__100_hilbert[,1],
     (MIA_Ti__100_hilbert[,2]),
     col="green",
     lwd=1.5,
     type = "l",
     ylim = c(-1.1,1.1),

```



```

    bty = "n",
    ylab = "",
    xlab = "",
    yaxt = "n",
    xaxt = "n"
  )

  lines(MIA_Ti__100[,1],(MIA_Ti__100[,2]),col="grey", lwd=0.5)

  axis(2, seq(from = -0.9, to = 0.9, by = 0.45), cex.axis = 0.5, las=1)

  title(ylab="filter output", line=2.2, cex.lab=0.75)

  title(main = "100 kyr cycle and envelope", line=-1, cex.main=0.75)

#31 kyr cycle and envelope
par(mar = c(3,3,0,1))

plot(MIA_Ti__31_hilbert[,1],
      (MIA_Ti__31_hilbert[,2]),
      col="orange",
      lwd=1.5,
      type = "l",
      ylim = c(-1.6,1.6),
      bty = "n",
      ylab = "",
      xlab = "",
      yaxt = "n",
      xaxt = "n"
    )

  lines(MIA_Ti__31[,1],(MIA_Ti__31[,2]),col="grey", lwd=0.5)

  axis(2, seq(from = -1.5, to = 1.5, by = 0.75), cex.axis = 0.5, las=1)

  title(ylab="filter output", line=2.2, cex.lab=0.75)

  axis(1, seq(from = 497000, to = 504000, by = 1000), cex.axis = 0.5)

  title(xlab="Age Before Present (kyr)", line=2, cex.lab=0.75)

  title(main = "31 kyr cycle and envelope", line=-0.5, cex.main=0.75)

```

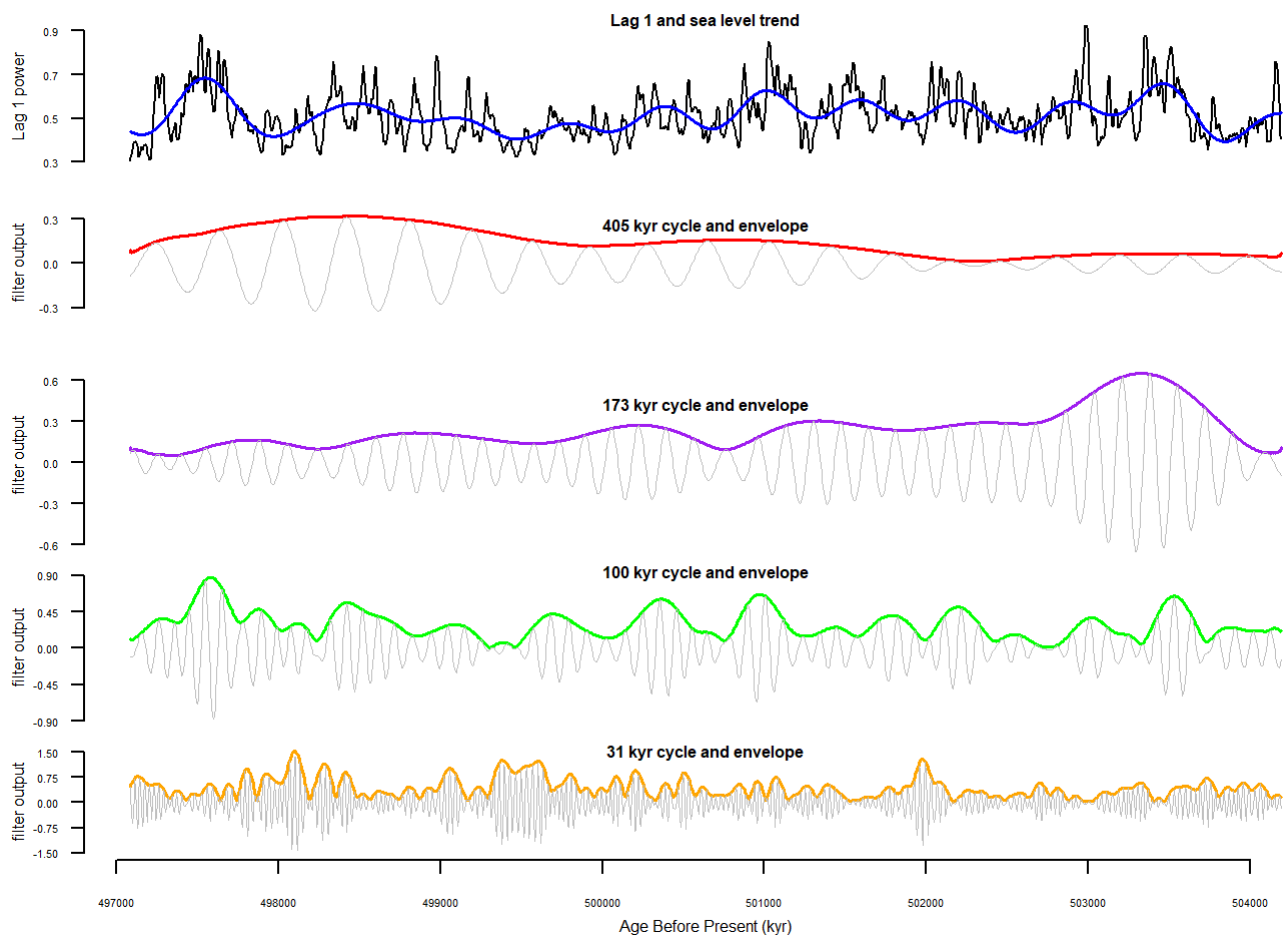

#Saving the lag-1 results and Milankovitch filters

```
# write.csv(lag_1_background,"Lag1_20-90window_background_0-1over500kyr.csv")
# write.csv(MIA_Ti_405_hilbert,"MIA_TI_rsp_5kyr_405kyr_hilbert.csv")
# write.csv(MIA_Ti_173_hilbert,"MIA_TI_rsp_5kyr_173kyr_hilbert.csv")
# write.csv(MIA_Ti_100_hilbert,"MIA_TI_rsp_5kyr_100kyr_hilbert.csv")
# write.csv(MIA_Ti_31_hilbert,"MIA_TI_rsp_5kyr_31kyr_hilbert.csv")
```
