# Supplementary material for: Astronomical calibration of the middle Cambrian in Baltica: Global carbon cycle synchronization and climate dynamics
Source: Research Square preprint supplement (doi:10.21203/rs.3.rs-7509865/v1), 2025-09-11
Supplement: Supplementary file 2 [file 9ff4add0072f34e3934a27a3.xlsx]

## Sheet: ATS (20% Anthraconite)
	Original Depth (m)	GR Corr. Depth (m)	Adjusted Depth (m)	Ti (%)	Ti (Z-score)		Biostratigraphy		Floating ATS (this study)				Time Scale (Ma)
									Min	Mean	Max		Min	Mean	Max
Data from Zhao et al (2022b)	200	200.18	62.111	0.58932	1.57549		Olenus							497.083			Series	Stage	Superzones	Biozone	Durations (Myr)
		200.18	62.112	0.55686	1.10323									497.084			Miaolingian Series	Guzhangian	Paradoxides forchhammeri	Agnostus pisiformis + Lejopyge laevigata	3.165 + 0.259/- 0.041		6.920 +0.386/- 0.167
	200.001	200.181	62.113	0.5244	0.630971									497.084				Drumian		Goniagnostus nathrosti	0.691 +/- 0.024	3.009 +/- 0.078
	200.002	200.182	62.114	0.53724	0.81778									497.084					Paradoxides paradoxissimus	Ptychagnostus punctuosus	1.326 +/- 0.032
	200.003	200.183	62.115	0.52758	0.677237									497.084						Ptychagnostus atavus	0.992 +/- 0.022
	200.005	200.185	62.116	0.50436	0.339409									497.084				Wuliuan		Ptychagnostus gibbus	0.746 +/- 0.049
	200.006	200.186	62.117	0.54042	0.864046									497.084				DICE			~ 0.75-0.8
		200.187	62.118	0.50655	0.371271									497.085
	200.007	200.187	62.119	0.47268	-0.121504									497.085			Biozones
	200.008	200.188	62.12	0.45222	-0.419177									497.085			ID	Age (Myr)		Age uncertainety (Myr)	Duration (Myr)	Duration uncertainety (Myr)
	200.009	200.189	62.121	0.54696	0.959197									497.085			base Olenus	497.277		+1.2/-0.9	-	-	-		Anchor ange	499.911	Duration (Myr)	Duration uncertainety
	200.011	200.191	62.122	0.52638	0.659778									497.085			base Pa. forchhammeri	501.133		0.964893	3.85637	-0.0648927	0.235107		Base L. laevigata	500.443	0.531175	-0.0367675	-0.0367675
		200.192	62.123	0.50745	0.384365									497.085			base G. nathrosti	501.133		0.964893	0.690694	-0.0241837	0.0241837
	200.012	200.192	62.124	0.48852	0.108952									497.086			base Pt. punctuosus	502.459		0.996464	1.32607	-0.0315714	0.0315714
	200.013	200.193	62.125	0.48336	0.0338792									497.086			base Pt. atavus	503.451		1.01847	0.992015	-0.0220058	0.0220058
	200.014	200.194	62.126	0.47106	-0.145074									497.086			base Pt. gibbus	504.197		1.06737	0.745959	-0.0489041	0.0489041
	200.016	200.196	62.127	0.48702	0.0871286									497.086			base Pa. Paradoxissimus	504.197		1.06737	3.06405	-0.102481	0.102481
	200.017	200.197	62.128	0.531	0.726994									497.086
		200.198	62.129	0.52365	0.620059									497.086						(Preferred) Age model based on WaverideR analysis of 4 proxies
	200.02	200.2	62.13	0.5163	0.513124									497.087
	200.019	200.199	62.131	0.55374	1.05784									497.087
	200.02	200.2	62.132	0.55758	1.11371									497.087
	200.022	200.202	62.133	0.53124	0.730486									497.087
		200.202	62.134	0.53133	0.731796									497.087
	200.023	200.203	62.135	0.53142	0.733105									497.087
	200.024	200.204	62.136	0.46434	-0.242843									497.088
	200.025	200.205	62.137	0.4677	-0.193958									497.088
	200.027	200.207	62.138	0.46392	-0.248954									497.088
	200.028	200.208	62.139	0.45306	-0.406956									497.088
		200.209	62.14	0.47058	-0.152057									497.088
	200.029	200.209	62.141	0.4881	0.102842									497.088
	200.03	200.21	62.142	0.4908	0.142124									497.089
	200.031	200.211	62.143	0.53436	0.775879									497.089
	200.033	200.213	62.144	0.50472	0.344646									497.089
		200.214	62.145	0.48771	0.0971674									497.089
	200.034	200.214	62.146	0.4707	-0.150311									497.089
	200.035	200.215	62.147	0.44022	-0.593765									497.089
	200.036	200.216	62.148	0.45018	-0.448857									497.09
	200.038	200.218	62.149	0.40434	-1.11578									497.09
	200.039	200.219	62.15	0.43218	-0.71074									497.09
		200.219	62.151	0.4164	-0.940323									497.09
	200.04	200.22	62.152	0.40062	-1.16991									497.09
	200.041	200.221	62.153	0.46002	-0.305695									497.09
	200.042	200.222	62.154	0.42684	-0.788431									497.091
	200.044	200.224	62.155	0.38616	-1.38029									497.091
		200.225	62.156	0.40038	-1.1734									497.091
	200.045	200.225	62.157	0.4146	-0.966511									497.091
	200.046	200.226	62.158	0.40722	-1.07388									497.091
	200.047	200.227	62.159	0.34128	-2.03325									497.091
	200.049	200.229	62.16	0.36108	-1.74517									497.092
	200.05	200.23	62.161	0.3606	-1.75216									497.092
		200.231	62.162	0.37488	-1.5444									497.092
	200.051	200.231	62.163	0.38916	-1.33664									497.092
	200.052	200.232	62.164	0.37254	-1.57844									497.092
	200.053	200.233	62.165	0.40794	-1.06341									497.092
	200.055	200.235	62.166	0.37434	-1.55225									497.093
		200.236	62.167	0.4098	-1.03635									497.093
	200.056	200.236	62.168	0.44526	-0.520438									497.093
	200.057	200.237	62.169	0.40962	-1.03897									497.093
	200.058	200.238	62.17	0.42084	-0.875725									497.093
	200.06	200.24	62.171	0.33642	-2.10395									497.093
	200.061	200.241	62.172	0.38922	-1.33577									497.094
		200.242	62.173	0.37086	-1.60289									497.094
	200.062	200.242	62.174	0.3525	-1.87001									497.094
	200.063	200.243	62.175	0.35382	-1.8508									497.094
	200.065	200.245	62.176	0.36528	-1.68407									497.094
	200.066	200.246	62.177	0.36876	-1.63344									497.094
		200.247	62.178	0.36363	-1.70807									497.095
	200.067	200.247	62.179	0.3585	-1.78271									497.095
	200.068	200.248	62.18	0.32022	-2.33965									497.095
	200.069	200.249	62.181	0.31998	-2.34314									497.095
	200.071	200.251	62.182	0.62232	2.05561									497.095
		200.252	62.183	0.61182	1.90285									497.095
	200.072	200.252	62.184	0.60132	1.75008									497.096
	200.073	200.253	62.185	0.5643	1.21148									497.096
	200.074	200.254	62.186	0.5418	0.884124									497.096
	200.076	200.256	62.187	0.58818	1.55891									497.096
	200.077	200.257	62.188	0.53358	0.764531									497.096
		200.257	62.189	0.53334	0.761039									497.096
	200.078	200.258	62.19	0.5331	0.757547									497.097
	200.079	200.259	62.191	0.52464	0.634463									497.097
	200.08	200.26	62.192	0.49068	0.140378									497.097
	200.082	200.262	62.193	0.53328	0.760166									497.097
		200.262	62.194	0.5262	0.657159									497.097
	200.083	200.263	62.195	0.51912	0.554152									497.097
	200.084	200.264	62.196	0.49692	0.231164									497.098
	200.085	200.265	62.197	0.50766	0.38742									497.098
	200.087	200.267	62.198	0.4974	0.238147									497.098
	200.088	200.268	62.199	0.519	0.552406									497.098
		200.269	62.2	0.5355	0.792465									497.098
	200.089	200.269	62.201	0.552	1.03252									497.098
	200.09	200.27	62.202	0.57192	1.32234									497.099
	200.091	200.271	62.203	0.47004	-0.159914									497.099
	200.093	200.273	62.204	0.51852	0.545423									497.099
		200.274	62.205	0.52632	0.658905									497.099
	200.094	200.274	62.206	0.53412	0.772387									497.099
	200.095	200.275	62.207	0.5718	1.32059									497.099
	200.096	200.276	62.208	0.53496	0.784609									497.1
	200.098	200.278	62.209	0.56262	1.18703									497.1
	200.099	200.279	62.21	0.54198	0.886743									497.1
		200.279	62.211	0.4509	-0.438382									497.1
	200.1	200.28	62.212	0.35982	-1.76351									497.1
	200.101	200.281	62.213	0.4428	-0.556229									497.1
	200.102	200.282	62.214	0.41496	-0.961274									497.101
	200.103	200.283	62.215	0.41232	-0.999683									497.101
	200.104	200.284	62.216	0.44646	-0.50298									497.101
	200.105	200.285	62.217	0.42756	-0.777956									497.101
	200.107	200.287	62.218	0.46512	-0.231495									497.101
	200.108	200.288	62.219	0.50382	0.331552									497.101
	200.109	200.289	62.22	0.50886	0.404879									497.102
		200.29	62.221	0.50814	0.394404									497.102
	200.11	200.29	62.222	0.50742	0.383929									497.102
	200.111	200.291	62.223	0.51666	0.518362									497.102
	200.112	200.292	62.224	0.56658	1.24465									497.102
	200.113	200.293	62.225	0.54078	0.869284									497.102
	200.114	200.294	62.226	0.57072	1.30488									497.103
	200.115	200.295	62.227	0.49716	0.234656									497.103
	200.116	200.296	62.228	0.49134	0.14998									497.103
	200.118	200.298	62.229	0.49146	0.151726									497.103
	200.119	200.299	62.23	0.50772	0.388293									497.103
	200.12	200.3	62.231	0.4881	0.102842									497.103
	200.121	200.301	62.232	0.4944	0.1945									497.104
		200.302	62.233	0.48846	0.108079									497.104
	200.122	200.302	62.234	0.48252	0.021658									497.104
	200.123	200.303	62.235	0.4911	0.146489									497.104
	200.124	200.304	62.236	0.48162	0.00856391									497.104
	200.125	200.305	62.237	0.51714	0.525345									497.104
	200.126	200.306	62.238	0.52068	0.576849									497.105
	200.127	200.307	62.239	0.55044	1.00983									497.105
	200.128	200.308	62.24	0.522	0.596053									497.105
	200.13	200.31	62.241	0.53376	0.76715									497.105
	200.131	200.311	62.242	0.50184	0.302745									497.105
	200.132	200.312	62.243	0.46578	-0.221893									497.105
	200.133	200.313	62.244	0.4626	-0.268158									497.106
		200.314	62.245	0.486	0.0722886									497.106
	200.134	200.314	62.246	0.5094	0.412736									497.106
	200.135	200.315	62.247	0.49032	0.13514									497.106
	200.136	200.316	62.248	0.53586	0.797703									497.106
	200.137	200.317	62.249	0.56844	1.27171									497.106
	200.138	200.318	62.25	0.5805	1.44717									497.107
	200.139	200.319	62.251	0.5901	1.58684									497.107
	200.14	200.32	62.252	0.54132	0.87714									497.107
	200.142	200.322	62.253	0.53802	0.829129									497.107
	200.143	200.323	62.254	0.51756	0.531456									497.107
	200.144	200.324	62.255	0.45084	-0.439255									497.107
		200.325	62.256	0.43968	-0.601622									497.108
	200.145	200.325	62.257	0.42852	-0.763989									497.108
	200.146	200.326	62.258	0.47928	-0.0254808									497.108
	200.147	200.327	62.259	0.43848	-0.619081									497.108
	200.148	200.328	62.26	0.42798	-0.771845									497.108
	200.149	200.329	62.261	0.41742	-0.925483									497.108
	200.15	200.33	62.262	0.37398	-1.55749									497.109
	200.151	200.331	62.263	0.28056	-2.91666									497.109
	200.153	200.333	62.264	0.33756	-2.08737									497.109
	200.154	200.334	62.265	0.39294	-1.28164									497.109
	200.155	200.335	62.266	0.41136	-1.01365									497.109
	200.156	200.336	62.267	0.36804	-1.64391									497.109
		200.337	62.268	0.37149	-1.59372									497.11
	200.157	200.337	62.269	0.37494	-1.54353									497.11
	200.158	200.338	62.27	0.39078	-1.31307									497.11
	200.159	200.339	62.271	0.4617	-0.281253									497.11
	200.16	200.34	62.272	0.43512	-0.667965									497.11
	200.161	200.341	62.273	0.37998	-1.4702									497.11
	200.162	200.342	62.274	0.40842	-1.05642									497.111
	200.163	200.343	62.275	0.43008	-0.741293									497.111
	200.165	200.345	62.276	0.44502	-0.52393									497.111
	200.166	200.346	62.277	0.45354	-0.399973									497.111
	200.167	200.347	62.278	0.4506	-0.442747									497.111
	200.168	200.348	62.279	0.42696	-0.786685									497.111
		200.349	62.28	0.38727	-1.36414									497.112
	200.169	200.349	62.281	0.34758	-1.94159									497.112
	200.17	200.35	62.282	0.2913	-2.76041									497.112
	200.171	200.351	62.283	0.39564	-1.24236									497.112
	200.172	200.352	62.284	0.36072	-1.75041									497.112
	200.173	200.353	62.285	0.5178	0.534947									497.112
	200.174	200.354	62.286	0.5388	0.840477									497.113
	200.175	200.355	62.287	0.5475	0.967053									497.113
	200.177	200.357	62.288	0.56046	1.15561									497.113
	200.178	200.358	62.289	0.53748	0.821272									497.113
	200.179	200.359	62.29	0.58872	1.56676									497.113
		200.36	62.291	0.58689	1.54014									497.113
	200.18	200.36	62.292	0.58506	1.51351									497.114
	200.181	200.361	62.293	0.50112	0.29227									497.114
	200.182	200.362	62.294	0.48402	0.0434816									497.114
	200.183	200.363	62.295	0.50478	0.345519									497.114
	200.184	200.364	62.296	0.55008	1.00459									497.114
	200.185	200.365	62.297	0.50568	0.358613									497.114
	200.186	200.366	62.298	0.47934	-0.0246079									497.115
	200.188	200.368	62.299	0.53814	0.830874									497.115
	200.189	200.369	62.3	0.48588	0.0705427									497.115
	200.19	200.37	62.301	0.4995	0.2687									497.115
	200.191	200.371	62.302	0.55236	1.03776									497.115
		200.372	62.303	0.56595	1.23548									497.115
	200.192	200.372	62.304	0.57954	1.4332									497.116
	200.193	200.373	62.305	0.55326	1.05086									497.116
	200.194	200.374	62.306	0.5331	0.757547									497.116
	200.195	200.375	62.307	0.56544	1.22806									497.116
	200.196	200.376	62.308	0.54822	0.977529									497.116
	200.197	200.377	62.309	0.49932	0.266082									497.116
	200.198	200.378	62.31	0.50148	0.297507									497.117
	200.2	200.38	62.311	0.47694	-0.0595255									497.117
	200.201	200.381	62.312	0.49848	0.25386									497.117
	200.202	200.382	62.313	0.51858	0.546296									497.117
	200.203	200.383	62.314	0.5664	1.24203									497.117
		200.384	62.315	0.60279	1.77147									497.117
	200.204	200.384	62.316	0.63918	2.30091									497.118
	200.205	200.385	62.317	0.5991	1.71778									497.118
	200.206	200.386	62.318	0.61644	1.97006									497.118
	200.207	200.387	62.319	0.56184	1.17569									497.118
	200.208	200.388	62.32	0.52788	0.681602									497.118
	200.209	200.389	62.321	0.56058	1.15735									497.118
	200.21	200.39	62.322	0.52596	0.653667									497.119
	200.212	200.392	62.323	0.59232	1.61914									497.119
	200.213	200.393	62.324	0.53346	0.762785									497.119
	200.214	200.394	62.325	0.56766	1.26036									497.119
		200.394	62.326	0.55083	1.0155									497.119
	200.215	200.395	62.327	0.534	0.770642									497.119
	200.216	200.396	62.328	0.58896	1.57026									497.12
	200.217	200.397	62.329	0.5832	1.48645									497.12
	200.218	200.398	62.33	0.49416	0.191009									497.12
	200.219	200.399	62.331	0.49368	0.184025									497.12
	200.22	200.4	62.332	0.52824	0.686839									497.12
	200.221	200.401	62.333	0.5742	1.35551									497.12
	200.223	200.403	62.334	0.52338	0.616131									497.121
	200.224	200.404	62.335	0.52782	0.680729									497.121
	200.225	200.405	62.336	0.47184	-0.133725									497.121
	200.226	200.406	62.337	0.37668	-1.51821									497.121
		200.406	62.338	0.37881	-1.48722									497.121
	200.227	200.407	62.339	0.38094	-1.45623									497.121
	200.228	200.408	62.34	0.3708	-1.60376									497.122
	200.229	200.409	62.341	0.51996	0.566373									497.122
	200.23	200.41	62.342	0.45492	-0.379895									497.122
	200.231	200.411	62.343	0.46098	-0.291728									497.122
	200.232	200.412	62.344	0.44688	-0.496869									497.122
	200.233	200.413	62.345	0.44886	-0.468062									497.122
	200.235	200.415	62.346	0.44778	-0.483775									497.123
	200.236	200.416	62.347	0.47106	-0.145074									497.123
	200.237	200.417	62.348	0.48672	0.0827639									497.123
	200.238	200.418	62.349	0.50928	0.41099									497.123
		200.418	62.35	0.46653	-0.210981									497.123
	200.239	200.419	62.351	0.42378	-0.832951									497.123
	200.24	200.42	62.352	0.45882	-0.323154									497.124
	200.241	200.421	62.353	0.41184	-1.00667									497.124
	200.242	200.422	62.354	0.4308	-0.730817									497.124
	200.243	200.423	62.355	0.42906	-0.756133									497.124
	200.244	200.424	62.356	0.45798	-0.335375									497.124
	200.245	200.425	62.357	0.47304	-0.116267									497.124
	200.247	200.427	62.358	0.44226	-0.564085									497.125
	200.248	200.428	62.359	0.46242	-0.270777									497.125
	200.249	200.429	62.36	0.50706	0.378691									497.125
		200.43	62.361	0.4773	-0.0542879									497.125
	200.25	200.43	62.362	0.44754	-0.487267									497.125
	200.251	200.431	62.363	0.46188	-0.278634									497.125
	200.252	200.432	62.364	0.45258	-0.41394									497.126
	200.253	200.433	62.365	0.4275	-0.778829									497.126
	200.254	200.434	62.366	0.44268	-0.557975									497.126
	200.255	200.435	62.367	0.43272	-0.702883									497.126
	200.256	200.436	62.368	0.44334	-0.548373									497.126
	200.258	200.438	62.369	0.45444	-0.386878									497.126
	200.259	200.439	62.37	0.48012	-0.0132596									497.127
	200.26	200.44	62.371	0.4875	0.0941121									497.127
	200.261	200.441	62.372	0.50784	0.390039									497.127
		200.442	62.373	0.4851	0.0591945									497.127
	200.262	200.442	62.374	0.46236	-0.27165									497.127
	200.263	200.443	62.375	0.4866	0.081018									497.127
	200.264	200.444	62.376	0.52962	0.706917									497.128
	200.265	200.445	62.377	0.5148	0.4913									497.128
	200.266	200.446	62.378	0.46836	-0.184356									497.128
	200.267	200.447	62.379	0.43896	-0.612097									497.128
	200.268	200.448	62.38	0.21258										497.128
	200.272	200.452	62.381	0.15774	0.702595									497.128
	200.275	200.455	62.382	0.1575	0.694614									497.129
	200.276	200.456	62.383	0.1695	1.09368									497.129
	200.277	200.457	62.384	0.14652	0.329466									497.129
	200.278	200.458	62.385	0.15462	0.598837									497.129
	200.279	200.459	62.386	0.16272	0.868209									497.129
	200.282	200.462	62.387	0.16164	0.832292									497.129
	200.283	200.463	62.388	0.15618	0.650716									497.13
	200.285	200.465	62.389	0.15762	0.698605									497.13
	200.286	200.466	62.39	0.16068	0.800367									497.13
	200.289	200.469	62.391	0.1599	0.774428									497.13
	200.29	200.47	62.392	0.1656	0.963985									497.13
	200.293	200.473	62.393	0.15108	0.481112									497.13
	200.294	200.474	62.394	0.14652	0.329466									497.131
	200.295	200.475	62.395	0.13794	0.0441323									497.131
	200.296	200.476	62.396	0.14418	0.251648									497.131
	200.297	200.477	62.397	0.15042	0.459163									497.131
	200.301	200.481	62.398	0.14604	0.313503									497.131
	200.307	200.487	62.399	0.16362	0.898139									497.131
	200.308	200.488	62.4	0.15816	0.716563									497.132
	200.311	200.491	62.401	0.1494	0.425243									497.132
	200.312	200.492	62.402	0.15858	0.73053									497.132
	200.363	200.543	62.403	0.1377	0.0361509									497.132
	200.375	200.555	62.404	0.12858	-0.267141									497.132
	200.414	200.594	62.405	0.12264	-0.46468									497.132
	200.473	200.653	62.406	0.14274	0.20376									497.133
	200.5	200.68	62.407	0.09234	-1.47233									497.133
		200.685	62.408	0.0879	-1.61998									497.133
	200.51	200.69	62.409	0.08346	-1.76764									497.133
	200.521	200.701	62.41	0.09354	-1.43242									497.133
	200.524	200.704	62.411	0.07476	-2.05696									497.133
	200.526	200.706	62.412	0.08208	-1.81353									497.134
	200.527	200.707	62.413	0.07296	-2.11682									497.134
	200.546	200.726	62.414	0.10998	-0.885697									497.134
	200.547	200.727	62.415	0.11088	-0.855767									497.134
	200.548	200.728	62.416	0.19194	1.83994									497.134
	200.55	200.73	62.417	0.1614	0.824311									497.134
	200.552	200.732	62.418	0.1377	0.0361509									497.135
	200.553	200.733	62.419	0.1572	0.684637									497.135
		200.733	62.42	0.15117	0.484105									497.135
	200.554	200.734	62.421	0.14514	0.283573									497.135
	200.555	200.735	62.422	0.15156	0.497075									497.135
	200.556	200.736	62.423	0.15504	0.612805									497.135
	200.557	200.737	62.424	0.19074	1.80003									497.136
	200.558	200.738	62.425	0.17718	1.34909									497.136
	200.559	200.739	62.426	0.17658	1.32913									497.136
	200.564	200.744	62.427	0.1719	1.1735									497.136
	200.565	200.745	62.428	0.1938	1.9018									497.136
	200.566	200.746	62.429	0.27012	4.43987									497.136
	200.567	200.747	62.43	0.21534	2.61812									497.137
	200.568	200.748	62.431	0.18933	1.75314									497.137
	200.57	200.75	62.432	0.16332	0.888162									497.137
	200.573	200.753	62.433	0.1659	0.973962									497.137
	200.574	200.754	62.434	0.16368	0.900134									497.137
	200.575	200.755	62.435	0.21462	2.59418									497.137
	200.577	200.757	62.436	0.16788	1.03981									497.138
	200.579	200.759	62.437	0.18696	1.67433									497.138
	200.58	200.76	62.438	0.16932	1.0877									497.138
	200.583	200.763	62.439	0.15168	0.501066									497.138
	200.585	200.765	62.44	0.14526	0.287564									497.138
	200.586	200.766	62.441	0.17112	1.14756									497.138
	200.59	200.77	62.442	0.25146	3.81932									497.139
		200.771	62.443	0.26172	4.16052									497.139
	200.591	200.771	62.444	0.27198	4.50173									497.139
	200.592	200.772	62.445	0.31692										497.139
	200.593	200.773	62.446	0.57522	0.911088									497.139
	200.594	200.774	62.447	0.43704	-1.07216									497.139
	200.596	200.776	62.448	0.4797	-0.459879									497.14
	200.597	200.777	62.449	0.58398	1.03682									497.14
	200.598	200.778	62.45	0.62196	1.58193									497.14
	200.599	200.779	62.451	0.63138	1.71713									497.14
	200.6	200.78	62.452	0.61134	1.42951									497.14
	200.601	200.781	62.453	0.58092	0.992898									497.14
		200.781	62.454	0.56985	0.834014									497.141
	200.602	200.782	62.455	0.55878	0.67513									497.141
	200.603	200.783	62.456	0.58398	1.03682									497.141
	200.604	200.784	62.457	0.60462	1.33306									497.141
	200.605	200.785	62.458	0.5829	1.02132									497.141
	200.606	200.786	62.459	0.6003	1.27105									497.141
	200.608	200.788	62.46	0.59958	1.26072									497.142
	200.609	200.789	62.461	0.5883	1.09882									497.142
	200.61	200.79	62.462	0.6042	1.32703									497.142
	200.611	200.791	62.463	0.58314	1.02476									497.142
	200.612	200.792	62.464	0.55716	0.651879									497.142
	200.613	200.793	62.465	0.50856	-0.0456608									497.142
		200.793	62.466	0.5229	0.160156									497.143
	200.614	200.794	62.467	0.53724	0.365973									497.143
	200.615	200.795	62.468	0.57984	0.977397									497.143
	200.616	200.796	62.469	0.53598	0.347889									497.143
	200.617	200.797	62.47	0.56862	0.81636									497.143
	200.618	200.798	62.471	0.59088	1.13585									497.143
	200.62	200.8	62.472	0.57354	0.886975									497.144
	200.621	200.801	62.473	0.54528	0.481369									497.144
	200.622	200.802	62.474	0.53406	0.320332									497.144
	200.623	200.803	62.475	0.53424	0.322916									497.144
	200.624	200.804	62.476	0.5505	0.55629									497.144
	200.625	200.805	62.477	0.60834	1.38645									497.144
		200.805	62.478	0.59091	1.13628									497.145
	200.626	200.806	62.479	0.57348	0.886114									497.145
	200.627	200.807	62.48	0.59196	1.15135									497.145
	200.628	200.808	62.481	0.50802	-0.0534113									497.145
	200.629	200.809	62.482	0.47718	-0.496047									497.145
	200.631	200.811	62.483	0.43248	-1.13761									497.145
	200.632	200.812	62.484	0.60942	1.40195									497.146
	200.633	200.813	62.485	0.52236	0.152406									497.146
	200.634	200.814	62.486	0.49764	-0.202392									497.146
	200.635	200.815	62.487	0.56442	0.756079									497.146
	200.636	200.816	62.488	0.54006	0.406448									497.146
		200.817	62.489	0.56247	0.728091									497.146
	200.637	200.817	62.49	0.58488	1.04973									497.147
	200.638	200.818	62.491	0.52242	0.153267									497.147
	200.639	200.819	62.492	0.50574	-0.0861353									497.147
	200.64	200.82	62.493	0.522	0.147239									497.147
	200.641	200.821	62.494	0.5088	-0.0422162									497.147
	200.643	200.823	62.495	0.51372	0.0283989									497.147
	200.644	200.824	62.496	0.57246	0.871474									497.148
	200.645	200.825	62.497	0.47328	-0.552023									497.148
	200.646	200.826	62.498	0.52848	0.240244									497.148
	200.647	200.827	62.499	0.55038	0.554567									497.148
	200.648	200.828	62.5	0.54606	0.492564									497.148
		200.829	62.501	0.48675	-0.358692									497.148
	200.649	200.829	62.502	0.42744	-1.20995									497.149
	200.65	200.83	62.503	0.47022	-0.595942									497.149
	200.651	200.831	62.504	0.52452	0.183408									497.149
	200.652	200.832	62.505	0.5154	0.0525114									497.149
	200.654	200.834	62.506	0.44412	-0.970546									497.149
	200.655	200.835	62.507	0.4305	-1.16603									497.149
	200.656	200.836	62.508	0.54876	0.531316									497.15
	200.657	200.837	62.509	0.51774	0.0860966									497.15
	200.658	200.838	62.51	0.51438	0.0378716									497.15
	200.659	200.839	62.511	0.57588	0.92056									497.15
	200.66	200.84	62.512	0.52332	0.166184									497.15
		200.841	62.513	0.5175	0.0826519									497.15
	200.661	200.841	62.514	0.51168	-0.000880541									497.151
	200.662	200.842	62.515	0.52044	0.124849									497.151
	200.663	200.843	62.516	0.56904	0.822388									497.151
	200.664	200.844	62.517	0.52884	0.245411									497.151
	200.666	200.846	62.518	0.3801	-1.8894									497.151
	200.667	200.847	62.519	0.4479	-0.916293									497.151
	200.668	200.848	62.52	0.51366	0.0275377									497.151
	200.669	200.849	62.521	0.50628	-0.0783849									497.152
	200.67	200.85	62.522	0.51294	0.0172038									497.152
	200.671	200.851	62.523	0.5658	0.775885									497.152
		200.851	62.524	0.52482	0.187713									497.152
	200.672	200.852	62.525	0.48384	-0.400459									497.152
	200.673	200.853	62.526	0.51174	-1.93813e-05									497.152
	200.674	200.854	62.527	0.48744	-0.348789									497.153
	200.675	200.855	62.528	0.53718	0.365112									497.153
	200.676	200.856	62.529	0.52368	0.171351									497.153
	200.678	200.858	62.53	0.4506	-0.877541									497.153
	200.679	200.859	62.531	0.51606	0.0619841									497.153
	200.68	200.86	62.532	0.5754	0.913671									497.154
	200.681	200.861	62.533	0.51312	0.0197873									497.154
	200.682	200.862	62.534	0.55728	0.653601									497.154
	200.683	200.863	62.535	0.49752	-0.204114									497.154
		200.863	62.536	0.4623	-0.709615									497.154
	200.684	200.864	62.537	0.42708	-1.21512									497.154
	200.685	200.865	62.538	0.54738	0.511509									497.154
	200.686	200.866	62.539	0.5487	0.530455									497.155
	200.687	200.867	62.54	0.58734	1.08504									497.155
	200.689	200.869	62.541	0.53478	0.330666									497.155
	200.69	200.87	62.542	0.58458	1.04543									497.155
	200.691	200.871	62.543	0.57876	0.961896									497.155
	200.692	200.872	62.544	0.57144	0.856835									497.156
	200.693	200.873	62.545	0.52524	0.193742									497.156
	200.694	200.874	62.546	0.5595	0.685464									497.156
	200.695	200.875	62.547	0.58074	0.990314									497.156
		200.875	62.548	0.58167	1.00366									497.156
	200.696	200.876	62.549	0.5826	1.01701									497.156
	200.697	200.877	62.55	0.50628	-0.0783849									497.156
	200.698	200.878	62.551	0.55506	0.621738									497.157
	200.699	200.879	62.552	0.57954	0.973091									497.157
	200.701	200.881	62.553	0.56514	0.766413									497.157
	200.702	200.882	62.554	0.49746	-0.204975									497.157
	200.703	200.883	62.555	0.55338	0.597625									497.157
	200.704	200.884	62.556	0.5268	0.216132									497.158
	200.705	200.885	62.557	0.5283	0.237661									497.158
	200.706	200.886	62.558	0.57084	0.848223									497.158
		200.887	62.559	0.54438	0.468451									497.158
	200.707	200.887	62.56	0.51792	0.0886801									497.158
	200.708	200.888	62.561	0.56856	0.815499									497.158
	200.709	200.889	62.562	0.55734	0.654462									497.159
	200.71	200.89	62.563	0.5517	0.573513									497.159
	200.711	200.891	62.564	0.51798	0.0895412									497.159
	200.713	200.893	62.565	0.56442	0.756079									497.159
	200.714	200.894	62.566	0.37542	-1.95657									497.159
	200.715	200.895	62.567	0.48264	-0.417682									497.159
	200.716	200.896	62.568	0.42954	-1.17981									497.159
	200.717	200.897	62.569	0.47124	-0.581302									497.16
	200.718	200.898	62.57	0.42486	-1.24698									497.16
		200.899	62.571	0.43365	-1.12082									497.16
	200.719	200.899	62.572	0.44244	-0.994659									497.16
	200.72	200.9	62.573	0.44496	-0.95849									497.16
	200.721	200.901	62.574	0.4017	-1.57939									497.161
	200.722	200.902	62.575	0.50292	-0.12661									497.161
	200.724	200.904	62.576	0.57408	0.894726									497.161
	200.725	200.905	62.577	0.4761	-0.511548									497.161
	200.726	200.906	62.578	0.47886	-0.471935									497.161
	200.727	200.907	62.579	0.40038	-1.59833									497.161
	200.728	200.908	62.58	0.4293	-1.18325									497.161
	200.729	200.909	62.581	0.46842	-0.621777									497.162
	200.73	200.91	62.582	0.51522	0.0499279									497.162
		200.911	62.583	0.49413	-0.25277									497.162
	200.731	200.911	62.584	0.47304	-0.555467									497.162
	200.732	200.912	62.585	0.45954	-0.749228									497.162
	200.733	200.913	62.586	0.48876	-0.329844									497.163
	200.734	200.914	62.587	0.44346	-0.980019									497.163
	200.736	200.916	62.588	0.4506	-0.877541									497.163
	200.737	200.917	62.589	0.4263	-1.22631									497.163
	200.738	200.918	62.59	0.43194	-1.14536									497.163
	200.739	200.919	62.591	0.40812	-1.48724									497.163
	200.74	200.92	62.592	0.40224	-1.57164									497.163
	200.741	200.921	62.593	0.45666	-0.790564									497.164
		200.922	62.594	0.46668	-0.64675									497.164
	200.742	200.922	62.595	0.4767	-0.502937									497.164
	200.743	200.923	62.596	0.34434	-2.40265									497.164
	200.744	200.924	62.597	0.39942	-1.61211									497.164
	200.745	200.925	62.598	0.42918	-1.18498									497.164
	200.746	200.926	62.599	0.39564	-1.66636									497.165
	200.748	200.928	62.6	0.46368	-0.689808									497.165
	200.749	200.929	62.601	0.41922	-1.32793									497.165
	200.75	200.93	62.602	0.45786	-0.773341									497.165
	200.751	200.931	62.603	0.41418	-1.40027									497.165
	200.752	200.932	62.604	0.43914	-1.04202									497.166
	200.753	200.933	62.605	0.48174	-0.430599									497.166
		200.933	62.606	0.43779	-1.0614									497.166
	200.754	200.934	62.607	0.39384	-1.6922									497.166
	200.755	200.935	62.608	0.34956	-2.32773									497.166
	200.756	200.936	62.609	0.44046	-1.02308									497.166
	200.757	200.937	62.61	0.42144	-1.29606									497.166
	200.759	200.939	62.611	0.51792	0.0886801									497.167
	200.76	200.94	62.612	0.52596	0.204075									497.167
	200.761	200.941	62.613	0.51264	0.012898									497.167
	200.762	200.942	62.614	0.4503	-0.881847									497.167
	200.763	200.943	62.615	0.46824	-0.62436									497.167
	200.764	200.944	62.616	0.54966	0.544234									497.168
	200.765	200.945	62.617	0.52302	0.161879									497.168
		200.945	62.618	0.50613	-0.0805378									497.168
	200.766	200.946	62.619	0.48924	-0.322954									497.168
	200.767	200.947	62.62	0.44226	-0.997242									497.168
	200.768	200.948	62.621	0.45858	-0.763007									497.168
	200.769	200.949	62.622	0.45156	-0.863763									497.168
	200.771	200.951	62.623	0.46098	-0.72856									497.169
	200.772	200.952	62.624	0.45174	-0.861179									497.169
	200.773	200.953	62.625	0.48396	-0.398736									497.169
	200.774	200.954	62.626	0.55788	0.662212									497.169
	200.775	200.955	62.627	0.61146	1.43123									497.169
	200.776	200.956	62.628	0.61092	1.42348									497.17
		200.957	62.629	0.57969	0.975244									497.17
	200.777	200.957	62.63	0.54846	0.52701									497.17
	200.778	200.958	62.631	0.5976	1.2323									497.17
	200.779	200.959	62.632	0.60516	1.34081									497.17
	200.78	200.96	62.633	0.5631	0.737133									497.17
	200.781	200.961	62.634	0.64896	1.96945									497.171
	200.783	200.963	62.635	0.6276	1.66288									497.171
	200.784	200.964	62.636	0.5676	0.80172									497.171
	200.785	200.965	62.637	0.50736	-0.062884									497.171
	200.786	200.966	62.638	0.56538	0.769857									497.171
	200.787	200.967	62.639	0.49134	-0.292814									497.171
	200.788	200.968	62.64	0.56364	0.744884									497.171
		200.969	62.641	0.55098	0.563179									497.172
	200.789	200.969	62.642	0.53832	0.381474									497.172
	200.79	200.97	62.643	0.55614	0.637239									497.172
	200.791	200.971	62.644	0.5346	0.328082									497.172
	200.792	200.972	62.645	0.59082	1.13499									497.172
	200.794	200.974	62.646	0.6159	1.49495									497.173
	200.795	200.975	62.647	0.54468	0.472757									497.173
	200.796	200.976	62.648	0.57552	0.915393									497.173
	200.797	200.977	62.649	0.585	1.05146									497.173
	200.798	200.978	62.65	0.56934	0.826694									497.173
	200.799	200.979	62.651	0.59814	1.24005									497.173
	200.8	200.98	62.652	0.49746	-0.204975									497.173
		200.981	62.653	0.53703	0.362959									497.174
	200.801	200.981	62.654	0.5766	0.930894									497.174
	200.802	200.982	62.655	0.60474	1.33478									497.174
	200.803	200.983	62.656	0.61098	1.42434									497.174
	200.804	200.984	62.657	0.61818	1.52768									497.174
	200.806	200.986	62.658	0.61374	1.46395									497.175
	200.807	200.987	62.659	0.51504	0.0473444									497.175
	200.808	200.988	62.66	0.58644	1.07212									497.175
	200.809	200.989	62.661	0.64164	1.86439									497.175
	200.81	200.99	62.662	0.60282	1.30722									497.175
	200.811	200.991	62.663	0.57552	0.915393									497.175
		200.992	62.664	0.558	0.663935									497.175
	200.812	200.992	62.665	0.54048	0.412476									497.176
	200.813	200.993	62.666	0.54786	0.518399									497.176
	200.814	200.994	62.667	0.56184	0.719049									497.176
	200.815	200.995	62.668	0.57372	0.889559									497.176
	200.816	200.996	62.669	0.61686	1.50873									497.176
	200.818	200.998	62.67	0.54936	0.539928									497.176
	200.819	200.999	62.671	0.52746	0.225604									497.177
	200.82	201	62.672	0.57336	0.884392									497.177
	200.821	201.001	62.673	0.58266	1.01787									497.177
	200.822	201.002	62.674	0.5679	0.806026									497.177
	200.823	201.003	62.675	0.5547	0.616571									497.177
		201.004	62.676	0.52605	0.205367									497.178
	200.824	201.004	62.677	0.4974	-0.205837									497.178
	200.825	201.005	62.678	0.5409	0.418504									497.178
	200.826	201.006	62.679	0.51948	0.11107									497.178
	200.827	201.007	62.68	0.49068	-0.302286									497.178
	200.829	201.009	62.681	0.47886	-0.471935									497.178
	200.83	201.01	62.682	0.54774	0.516676									497.178
	200.831	201.011	62.683	0.56052	0.700103									497.179
	200.832	201.012	62.684	0.53748	0.369418									497.179
	200.833	201.013	62.685	0.56022	0.695798									497.179
	200.834	201.014	62.686	0.5076	-0.0594394									497.179
	200.835	201.015	62.687	0.53544	0.340139									497.179
		201.016	62.688	0.55317	0.594611									497.18
	200.836	201.016	62.689	0.5709	0.849084									497.18
	200.837	201.017	62.69	0.52872	0.243689									497.18
	200.838	201.018	62.691	0.56754	0.800859									497.18
	200.839	201.019	62.692	0.51534	0.0516502									497.18
	200.841	201.021	62.693	0.54324	0.452089									497.18
	200.842	201.022	62.694	0.54558	0.485675									497.18
	200.843	201.023	62.695	0.51144	-0.00432518									497.181
	200.844	201.024	62.696	0.51198	0.00342526									497.181
	200.845	201.025	62.697	0.53802	0.377169									497.181
	200.846	201.026	62.698	0.52266	0.156712									497.181
		201.026	62.699	0.50934	-0.0344658									497.181
	200.847	201.027	62.7	0.49602	-0.225643									497.182
	200.848	201.028	62.701	0.53106	0.277274									497.182
	200.849	201.029	62.702	0.49632	-0.221337									497.182
	200.85	201.03	62.703	0.5586	0.672546									497.182
	200.851	201.031	62.704	0.47538	-0.521882									497.182
	200.853	201.033	62.705	0.45216	-0.855151									497.182
	200.854	201.034	62.706	0.52938	0.253162									497.183
	200.855	201.035	62.707	0.474	-0.541689									497.183
	200.856	201.036	62.708	0.52842	0.239383									497.183
	200.857	201.037	62.709	0.55674	0.64585									497.183
	200.858	201.038	62.71	0.5223	0.151545									497.183
		201.038	62.711	0.51615	0.0632759									497.183
	200.859	201.039	62.712	0.51	-0.024993									497.183
	200.86	201.04	62.713	0.51354	0.0258154									497.184
	200.861	201.041	62.714	0.58908	1.11002									497.184
	200.862	201.042	62.715	0.49446	-0.248033									497.184
	200.864	201.044	62.716	0.46716	-0.639861									497.184
	200.865	201.045	62.717	0.54072	0.415921									497.184
	200.866	201.046	62.718	0.46386	-0.687225									497.185
	200.867	201.047	62.719	0.34434	-2.40265									497.185
	200.868	201.048	62.72	0.549	0.534761									497.185
	200.869	201.049	62.721	0.54984	0.546817									497.185
		201.05	62.722	0.54108	0.421088									497.185
	200.87	201.05	62.723	0.53232	0.295358									497.185
	200.871	201.051	62.724	0.55446	0.613126									497.185
	200.872	201.052	62.725	0.54396	0.462423									497.186
	200.873	201.053	62.726	0.50586	-0.084413									497.186
	200.874	201.054	62.727	0.43344	-1.12383									497.186
	200.876	201.056	62.728	0.4653	-0.666557									497.186
	200.877	201.057	62.729	0.48732	-0.350511									497.186
	200.878	201.058	62.73	0.43452	-1.10833									497.187
	200.879	201.059	62.731	0.37002	-2.03408									497.187
	200.88	201.06	62.732	0.41034	-1.45538									497.187
	200.881	201.061	62.733	0.38292	-1.84893									497.187
		201.062	62.734	0.35997	-2.17832									497.187
	200.882	201.062	62.735	0.33702	-2.50772									497.187
	200.883	201.063	62.736	0.43602	-1.0868									497.188
	200.884	201.064	62.737	0.36312	-2.13311									497.188
	200.885	201.065	62.738	0.34434	-2.40265									497.188
	200.886	201.066	62.739	0.28422	-3.26554									497.188
	200.888	201.068	62.74	0.4299	-1.17464									497.188
	200.889	201.069	62.741	0.42888	-1.18928									497.188
	200.89	201.07	62.742	0.3744	-1.97121									497.188
	200.891	201.071	62.743	0.42126	-1.29865									497.189
	200.892	201.072	62.744	0.41262	-1.42266									497.189
	200.893	201.073	62.745	0.39654	-1.65345									497.189
		201.074	62.746	0.39708	-1.6457									497.189
	200.894	201.074	62.747	0.39762	-1.63795									497.189
	200.895	201.075	62.748	0.40122	-1.58628									497.19
	200.896	201.076	62.749	0.3909	-1.73439									497.19
	200.897	201.077	62.75	0.4092	-1.47174									497.19
	200.899	201.079	62.751	0.43494	-1.1023									497.19
	200.9	201.08	62.752	0.34998	-2.32171									497.19
	200.901	201.081	62.753	0.34356	-2.41385									497.19
	200.902	201.082	62.754	0.40278	-1.56389									497.19
	200.903	201.083	62.755	0.44178	-1.00413									497.191
	200.904	201.084	62.756	0.38652	-1.79726									497.191
		201.084	62.757	0.41787	-1.3473									497.191
	200.905	201.085	62.758	0.44922	-0.897348									497.191
	200.906	201.086	62.759	0.5886	1.10313									497.191
	200.907	201.087	62.76	0.49974	-0.172251									497.192
	200.908	201.088	62.761	0.486	-0.369457									497.192
	200.909	201.089	62.762	0.52176	0.143794									497.192
	200.911	201.091	62.763	0.4746	-0.533077									497.192
	200.912	201.092	62.764	0.41292	-1.41835									497.192
	200.913	201.093	62.765	0.5394	0.396975									497.192
	200.914	201.094	62.766	0.48012	-0.453851									497.192
	200.915	201.095	62.767	0.42078	-1.30554									497.193
	200.916	201.096	62.768	0.49812	-0.195503									497.193
		201.096	62.769	0.48066	-0.4461									497.193
	200.917	201.097	62.77	0.4632	-0.696698									497.193
	200.918	201.098	62.771	0.40176	-1.57853									497.193
	200.919	201.099	62.772	0.51606	0.0619841									497.193
	200.92	201.1	62.773	0.4155	-1.38132									497.194
	200.922	201.102	62.774	0.43482	-1.10403									497.194
	200.923	201.103	62.775	0.41274	-1.42093									497.194
	200.924	201.104	62.776	0.489	-0.326399									497.194
	200.925	201.105	62.777	0.49746	-0.204975									497.194
	200.926	201.106	62.778	0.3741	-1.97552									497.195
	200.927	201.107	62.779	0.37122	-2.01686									497.195
	200.928	201.108	62.78	0.45672	-0.789703									497.195
		201.108	62.781	0.52701	0.219146									497.195
	200.929	201.109	62.782	0.5973	1.22799									497.195
	200.93	201.11	62.783	0.37176	-2.0091									497.195
	200.931	201.111	62.784	0.51492	0.0456221									497.195
	200.932	201.112	62.785	0.53526	0.337555									497.196
	200.934	201.114	62.786	0.52062	0.127432									497.196
	200.935	201.115	62.787	0.51042	-0.0189649									497.196
	200.936	201.116	62.788	0.57078	0.847362									497.196
	200.937	201.117	62.789	0.5316	0.285024									497.196
	200.938	201.118	62.79	0.5055	-0.08958									497.197
	200.939	201.119	62.791	0.51144	-0.00432518									497.197
		201.12	62.792	0.52704	0.219576									497.197
	200.94	201.12	62.793	0.54264	0.443478									497.197
	200.941	201.121	62.794	0.52614	0.206659									497.197
	200.942	201.122	62.795	0.5484	0.526149									497.197
	200.943	201.123	62.796	0.5514	0.569207									497.197
	200.944	201.124	62.797	0.56508	0.765552									497.198
	200.946	201.126	62.798	0.53754	0.370279									497.198
	200.947	201.127	62.799	0.615	1.48204									497.198
	200.948	201.128	62.8	0.53676	0.359084									497.198
	200.949	201.129	62.801	0.56448	0.75694									497.198
	200.95	201.13	62.802	0.5691	0.823249									497.199
	200.951	201.131	62.803	0.58896	1.10829									497.199
		201.132	62.804	0.59913	1.25426									497.199
	200.952	201.132	62.805	0.6093	1.40023									497.199
	200.953	201.133	62.806	0.59838	1.2435									497.199
	200.954	201.134	62.807	0.49728	-0.207559									497.199
	200.955	201.135	62.808	0.4761	-0.511548									497.2
	200.957	201.137	62.809	0.43086	-1.16086									497.2
	200.958	201.138	62.81	0.4545	-0.821566									497.2
	200.959	201.139	62.811	0.46686	-0.644167									497.2
	200.96	201.14	62.812	0.48132	-0.436627									497.2
	200.961	201.141	62.813	0.49296	-0.269562									497.2
	200.962	201.142	62.814	0.5286	0.241966									497.2
	200.963	201.143	62.815	0.50448	-0.10422									497.201
		201.144	62.816	0.51339	0.0236625									497.201
	200.964	201.144	62.817	0.5223	0.151545									497.201
	200.965	201.145	62.818	0.5013	-0.149861									497.201
	200.966	201.146	62.819	0.50004	-0.167946									497.201
	200.967	201.147	62.82	0.50802	-0.0534113									497.202
	200.969	201.149	62.821	0.47988	-0.457295									497.202
	200.97	201.15	62.822	0.4812	-0.43835									497.202
	200.971	201.151	62.823	0.4692	-0.610582									497.202
	200.972	201.152	62.824	0.5604	0.698381									497.202
	200.973	201.153	62.825	0.5556	0.629488									497.202
	200.974	201.154	62.826	0.53976	0.402142									497.202
		201.154	62.827	0.53811	0.37846									497.203
	200.975	201.155	62.828	0.53646	0.354778									497.203
	200.976	201.156	62.829	0.58758	1.08849									497.203
	200.977	201.157	62.83	0.55626	0.638961									497.203
	200.978	201.158	62.831	0.52944	0.254023									497.203
	200.979	201.159	62.832	0.52308	0.16274									497.204
	200.981	201.161	62.833	0.56184	0.719049									497.204
	200.982	201.162	62.834	0.56358	0.744023									497.204
	200.983	201.163	62.835	0.52002	0.118821									497.204
	200.984	201.164	62.836	0.49248	-0.276452									497.204
	200.985	201.165	62.837	0.53322	0.308276									497.204
	200.986	201.166	62.838	0.47148	-0.577858									497.204
		201.166	62.839	0.49404	-0.254061									497.205
	200.987	201.167	62.84	0.5166	0.0697346									497.205
	200.988	201.168	62.841	0.51366	0.0275377									497.205
	200.989	201.169	62.842	0.57474	0.904198									497.205
	200.99	201.17	62.843	0.5526	0.58643									497.205
	200.992	201.172	62.844	0.53874	0.387502									497.205
	200.993	201.173	62.845	0.49956	-0.174835									497.206
	200.994	201.174	62.846	0.5451	0.478785									497.206
	200.995	201.175	62.847	0.50292	-0.12661									497.206
	200.996	201.176	62.848	0.53484	0.331527									497.206
	200.997	201.177	62.849	0.51648	0.0680122									497.206
	200.998	201.178	62.85	0.49116	-0.295397									497.207
		201.178	62.851	0.5187	0.0998751									497.207
	200.999	201.179	62.852	0.54624	0.495147									497.207
	201	201.18	62.853	0.50556	-0.0887188									497.207
	201.001	201.181	62.854	0.52728	0.223021									497.207
	201.002	201.182	62.855	0.4824	-0.421126									497.207
	201.004	201.184	62.856	0.50316	-0.123165									497.207
	201.005	201.185	62.857	0.5361	0.349611									497.208
	201.006	201.186	62.858	0.5226	0.155851									497.208
	201.007	201.187	62.859	0.52788	0.231633									497.208
	201.008	201.188	62.86	0.54636	0.49687									497.208
	201.009	201.189	62.861	0.5661	0.780191									497.208
		201.19	62.862	0.54495	0.476633									497.209
	201.01	201.19	62.863	0.5238	0.173074									497.209
	201.011	201.191	62.864	0.54174	0.43056									497.209
	201.012	201.192	62.865	0.54456	0.471035									497.209
	201.013	201.193	62.866	0.57252	0.872335									497.209
	201.014	201.194	62.867	0.52146	0.139488									497.209
	201.016	201.196	62.868	0.50916	-0.0370492									497.209
	201.017	201.197	62.869	0.51876	0.100736									497.21
	201.018	201.198	62.87	0.56352	0.743161									497.21
	201.019	201.199	62.871	0.55104	0.56404									497.21
	201.02	201.2	62.872	0.50442	-0.105081									497.21
	201.021	201.201	62.873	0.54594	0.490842									497.21
		201.202	62.874	0.56901	0.821958									497.211
	201.022	201.202	62.875	0.59208	1.15307									497.211
	201.023	201.203	62.876	0.52044	0.124849									497.211
	201.024	201.204	62.877	0.50688	-0.0697733									497.211
	201.025	201.205	62.878	0.54444	0.469313									497.211
	201.027	201.207	62.879	0.50646	-0.0758014									497.211
	201.028	201.208	62.88	0.46056	-0.734589									497.212
	201.029	201.209	62.881	0.43224	-1.14106									497.212
	201.03	201.21	62.882	0.47274	-0.559773									497.212
	201.031	201.211	62.883	0.49926	-0.179141									497.212
	201.032	201.212	62.884	0.48252	-0.419404									497.212
	201.033	201.213	62.885	0.47628	-0.508965									497.212
		201.214	62.886	0.41349	-1.41017									497.212
	201.034	201.214	62.887	0.3507	-2.31137									497.213
	201.035	201.215	62.888	0.32946	-2.61622									497.213
	201.036	201.216	62.889	0.15468	-5.12478									497.213
	201.037	201.217	62.89	0.17838	-4.78462									497.213
	201.039	201.219	62.891	0.3438	-2.41041									497.213
	201.04	201.22	62.892	0.39894	-1.619									497.214
	201.041	201.221	62.893	0.51012	-0.0232707									497.214
	201.042	201.222	62.894	0.55818	0.666518									497.214
	201.043	201.223	62.895	0.51546	0.0533725									497.214
	201.044	201.224	62.896	0.4416	-1.00672									497.214
		201.225	62.897	0.46755	-0.634263									497.214
	201.045	201.225	62.898	0.4935	-0.261812									497.214
	201.046	201.226	62.899	0.44694	-0.930072									497.215
	201.047	201.227	62.9	0.58482	1.04887									497.215
	201.048	201.228	62.901	0.42486	-1.24698									497.215
	201.049	201.229	62.902	0.36036	-2.17273									497.215
	201.051	201.231	62.903	0.5445	0.470174									497.215
	201.052	201.232	62.904	0.50094	-0.155028									497.216
	201.053	201.233	62.905	0.4431	-0.985186									497.216
	201.054	201.234	62.906	0.4389	-1.04547									497.216
	201.055	201.235	62.907	0.52362	0.17049									497.216
	201.056	201.236	62.908	0.46626	-0.652778									497.216
		201.237	62.909	0.43959	-1.03556									497.216
	201.057	201.237	62.91	0.41292	-1.41835									497.216
	201.058	201.238	62.911	0.48966	-0.316926									497.217
	201.059	201.239	62.912	0.46608	-0.655362									497.217
	201.06	201.24	62.913	0.42228	-1.28401									497.217
	201.062	201.242	62.914	0.46638	-0.651056									497.217
	201.063	201.243	62.915	0.43224	-1.14106									497.217
	201.064	201.244	62.916	0.32958	-2.6145									497.217
	201.065	201.245	62.917	0.44394	-0.97313									497.218
	201.066	201.246	62.918	0.48438	-0.392708									497.218
	201.067	201.247	62.919	0.45312	-0.841372									497.218
	201.068	201.248	62.92	0.47586	-0.514993									497.218
		201.249	62.921	0.43125	-1.15527									497.218
	201.069	201.249	62.922	0.38664	-1.79554									497.219
	201.07	201.25	62.923	0.53868	0.386641									497.219
	201.071	201.251	62.924	0.56844	0.813777									497.219
	201.072	201.252	62.925	0.60054	1.2745									497.219
	201.074	201.254	62.926	0.50796	-0.0542724									497.219
	201.075	201.255	62.927	0.57216	0.867168									497.219
	201.076	201.256	62.928	0.58932	1.11346									497.219
	201.077	201.257	62.929	0.52008	0.119682									497.22
	201.078	201.258	62.93	0.51336	0.0232319									497.22
	201.079	201.259	62.931	0.4605	-0.73545									497.22
		201.26	62.932	0.45951	-0.749659									497.22
	201.08	201.26	62.933	0.45852	-0.763868									497.22
	201.081	201.261	62.934	0.30882	-2.91246									497.221
	201.082	201.262	62.935	0.41082	-1.44849									497.221
	201.083	201.263	62.936	0.4617	-0.718227									497.221
	201.084	201.264	62.937	0.48672	-0.359123									497.221
	201.086	201.266	62.938	0.56634	0.783636									497.221
	201.087	201.267	62.939	0.58158	1.00237									497.221
	201.088	201.268	62.94	0.50052	-0.161056									497.221
	201.089	201.269	62.941	0.52566	0.19977									497.222
	201.09	201.27	62.942	0.5037	-0.115415									497.222
	201.091	201.271	62.943	0.52554	0.198047									497.222
		201.272	62.944	0.50418	-0.108526									497.222
	201.092	201.272	62.945	0.48282	-0.415098									497.222
	201.093	201.273	62.946	0.3291	-2.62139									497.223
	201.094	201.274	62.947	0.50028	-0.164501									497.223
	201.095	201.275	62.948	0.59406	1.18149									497.223
	201.097	201.277	62.949	0.54144	0.426255									497.223
	201.098	201.278	62.95	0.55902	0.678574									497.223
	201.099	201.279	62.951	0.55548	0.627766									497.223
	201.1	201.28	62.952	0.46656	-0.648473									497.224
	201.101	201.281	62.953	0.5154	0.0525114									497.224
	201.102	201.282	62.954	0.56232	0.725938									497.224
	201.103	201.283	62.955	0.58542	1.05748									497.224
		201.284	62.956	0.60018	1.26933									497.224
	201.104	201.284	62.957	0.61494	1.48118									497.224
	201.105	201.285	62.958	0.62028	1.55782									497.224
	201.106	201.286	62.959	0.54228	0.438311									497.225
	201.107	201.287	62.96	0.59832	1.24263									497.225
	201.109	201.289	62.961	0.60012	1.26847									497.225
	201.11	201.29	62.962	0.56178	0.718188									497.225
	201.111	201.291	62.963	0.5757	0.917977									497.225
	201.112	201.292	62.964	0.55836	0.669102									497.226
	201.113	201.293	62.965	0.52884	0.245411									497.226
	201.114	201.294	62.966	0.57366	0.888697									497.226
		201.295	62.967	0.54462	0.471896									497.226
	201.115	201.295	62.968	0.51558	0.0550948									497.226
	201.116	201.296	62.969	0.58494	1.0506									497.226
	201.117	201.297	62.97	0.56736	0.798276									497.226
	201.118	201.298	62.971	0.5115	-0.00346402									497.227
	201.119	201.299	62.972	0.52548	0.197186									497.227
	201.121	201.301	62.973	0.50472	-0.100775									497.227
	201.122	201.302	62.974	0.5505	0.55629									497.227
	201.123	201.303	62.975	0.53052	0.269524									497.227
	201.124	201.304	62.976	0.51636	0.0662899									497.228
	201.125	201.305	62.977	0.52068	0.128293									497.228
	201.126	201.306	62.978	0.49554	-0.232532									497.228
		201.307	62.979	0.49896	-0.183446									497.228
	201.127	201.307	62.98	0.50238	-0.13436									497.228
	201.128	201.308	62.981	0.4938	-0.257506									497.228
	201.129	201.309	62.982	0.49266	-0.273868									497.228
	201.13	201.31	62.983	0.53148	0.283302									497.229
	201.132	201.312	62.984	0.56472	0.760385									497.229
	201.133	201.313	62.985	0.5367	0.358223									497.229
	201.134	201.314	62.986	0.57594	0.921421									497.229
	201.135	201.315	62.987	0.59892	1.25125									497.229
	201.136	201.316	62.988	0.52218	0.149822									497.229
	201.137	201.317	62.989	0.55278	0.589014									497.23
		201.317	62.99	0.5643	0.754357									497.23
	201.138	201.318	62.991	0.57582	0.919699									497.23
	201.139	201.319	62.992	0.55062	0.558012									497.23
	201.14	201.32	62.993	0.52488	0.188575									497.23
	201.141	201.321	62.994	0.56778	0.804304									497.231
	201.142	201.322	62.995	0.56166	0.716465									497.231
	201.144	201.324	62.996	0.55242	0.583847									497.231
	201.145	201.325	62.997	0.58308	1.0239									497.231
	201.146	201.326	62.998	0.54804	0.520982									497.231
	201.147	201.327	62.999	0.56586	0.776747									497.231
	201.148	201.328	63	0.5757	0.917977									497.231
	201.149	201.329	63.001	0.52734	0.223882									497.232
		201.329	63.002	0.53169	0.286316									497.232
	201.15	201.33	63.003	0.53604	0.34875									497.232
	201.151	201.331	63.004	0.53748	0.369418									497.232
	201.152	201.332	63.005	0.51096	-0.0112145									497.232
	201.153	201.333	63.006	0.42312	-1.27195									497.233
	201.154	201.334	63.007	0.53034	0.26694									497.233
	201.156	201.336	63.008	0.50802	-0.0534113									497.233
	201.157	201.337	63.009	0.56982	0.833583									497.233
	201.158	201.338	63.01	0.53262	0.299664									497.233
	201.159	201.339	63.011	0.50856	-0.0456608									497.233
	201.16	201.34	63.012	0.51828	0.093847									497.233
	201.161	201.341	63.013	0.5643	0.754357									497.234
		201.341	63.014	0.55338	0.597625									497.234
	201.162	201.342	63.015	0.54246	0.440894									497.234
	201.163	201.343	63.016	0.5649	0.762968									497.234
	201.164	201.344	63.017	0.45426	-0.82501									497.234
	201.165	201.345	63.018	0.55008	0.550262									497.235
	201.167	201.347	63.019	0.56922	0.824972									497.235
	201.168	201.348	63.02	0.57552	0.915393									497.235
	201.169	201.349	63.021	0.5331	0.306553									497.235
	201.17	201.35	63.022	0.5583	0.668241									497.235
	201.171	201.351	63.023	0.5475	0.513232									497.235
	201.172	201.352	63.024	0.53868	0.386641									497.236
		201.353	63.025	0.51957	0.112362									497.236
	201.173	201.353	63.026	0.50046	-0.161917									497.236
	201.174	201.354	63.027	0.54264	0.443478									497.236
	201.175	201.355	63.028	0.58842	1.10054									497.236
	201.176	201.356	63.029	0.57516	0.910226									497.236
	201.177	201.357	63.03	0.54852	0.527872									497.236
	201.179	201.359	63.031	0.55944	0.684603									497.237
	201.18	201.36	63.032	0.51348	0.0249542									497.237
	201.181	201.361	63.033	0.45372	-0.832761									497.237
	201.182	201.362	63.034	0.5331	0.306553									497.237
	201.183	201.363	63.035	0.54984	0.546817									497.237
	201.184	201.364	63.036	0.56604	0.77933									497.238
		201.365	63.037	0.56445	0.756509									497.238
	201.185	201.365	63.038	0.56286	0.733689									497.238
	201.186	201.366	63.039	0.48234	-0.421988									497.238
	201.187	201.367	63.04	0.53316	0.307415									497.238
	201.188	201.368	63.041	0.46164	-0.719088									497.238
	201.19	201.37	63.042	0.55788	0.662212									497.238
	201.191	201.371	63.043	0.54954	0.542511									497.239
	201.192	201.372	63.044	0.53718	0.365112									497.239
	201.193	201.373	63.045	0.49092	-0.298842									497.239
	201.194	201.374	63.046	0.51414	0.034427									497.239
	201.195	201.375	63.047	0.47544	-0.521021									497.239
	201.196	201.376	63.048	0.37632	-1.94366									497.24
		201.377	63.049	0.40071	-1.5936									497.24
	201.197	201.377	63.05	0.4251	-1.24353									497.24
	201.198	201.378	63.051	0.4473	-0.924905									497.24
	201.199	201.379	63.052	0.3852	-1.81621									497.24
	201.2	201.38	63.053	0.31872	-2.77037									497.24
	201.202	201.382	63.054	0.28998	-3.18287									497.24
	201.203	201.383	63.055	0.24306	-3.85629									497.241
	201.204	201.384	63.056	0.24522	-3.82529									497.241
	201.205	201.385	63.057	0.225	-4.1155									497.241
	201.206	201.386	63.058	0.17322	-4.85868									497.241
	201.207	201.387	63.059	0.1386	-5.35557									497.241
		201.387	63.06	0.25314	-3.71162									497.241
	201.208	201.388	63.061	0.36768	-2.06766									497.242
	201.209	201.389	63.062	0.49788	-0.198947									497.242
	201.21	201.39	63.063	0.55386	0.604515									497.242
	201.211	201.391	63.064	0.50628	-0.0783849									497.242
	201.212	201.392	63.065	0.52074	0.129155									497.242
	201.214	201.394	63.066	0.50376	-0.114554									497.243
	201.215	201.395	63.067	0.45114	-0.869791									497.243
	201.216	201.396	63.068	0.55356	0.600209									497.243
	201.217	201.397	63.069	0.53826	0.380613									497.243
	201.218	201.398	63.07	0.52488	0.188575									497.243
	201.219	201.399	63.071	0.48582	-0.37204									497.243
		201.399	63.072	0.47268	-0.560634									497.243
	201.22	201.4	63.073	0.45954	-0.749228									497.244
	201.221	201.401	63.074	0.50076	-0.157612									497.244
	201.222	201.402	63.075	0.44832	-0.910265									497.244
	201.223	201.403	63.076	0.36936	-2.04355									497.244
	201.225	201.405	63.077	0.45786	-0.773341									497.244
	201.226	201.406	63.078	0.50388	-0.112831									497.245
	201.227	201.407	63.079	0.50892	-0.0404939									497.245
	201.228	201.408	63.08	0.50352	-0.117998									497.245
	201.229	201.409	63.081	0.56238	0.726799									497.245
	201.23	201.41	63.082	0.51828	0.093847									497.245
	201.231	201.411	63.083	0.51258	0.0120369									497.245
		201.411	63.084	0.51237	0.0090228									497.245
	201.232	201.412	63.085	0.51216	0.00600874									497.246
	201.233	201.413	63.086	0.53622	0.351334									497.246
	201.234	201.414	63.087	0.50406	-0.110248									497.246
	201.235	201.415	63.088	0.50952	-0.0318823									497.246
	201.237	201.417	63.089	0.44946	-0.893903									497.246
	201.238	201.418	63.09	0.45348	-0.836205									497.247
	201.239	201.419	63.091	0.57168	0.860279									497.247
	201.24	201.42	63.092	0.51906	0.105042									497.247
	201.241	201.421	63.093	0.55002	0.5494									497.247
	201.242	201.422	63.094	0.5043	-0.106803									497.247
		201.423	63.095	0.50892	-0.0404939									497.247
	201.243	201.423	63.096	0.51354	0.0258154									497.248
	201.244	201.424	63.097	0.47712	-0.496909									497.248
	201.245	201.425	63.098	0.50556	-0.0887188									497.248
	201.246	201.426	63.099	0.53694	0.361668									497.248
	201.247	201.427	63.1	0.62028	1.55782									497.248
	201.249	201.429	63.101	0.57756	0.944673									497.248
	201.25	201.43	63.102	0.54444	0.469313									497.248
	201.251	201.431	63.103	0.55728	0.653601									497.249
	201.252	201.432	63.104	0.54984	0.546817									497.249
	201.253	201.433	63.105	0.40998	-1.46055									497.249
	201.254	201.434	63.106	0.57324	0.882669									497.249
		201.435	63.107	0.58197	1.00797									497.249
	201.255	201.435	63.108	0.5907	1.13327									497.25
	201.256	201.436	63.109	0.52638	0.210104									497.25
	201.257	201.437	63.11	0.56304	0.736272									497.25
	201.258	201.438	63.111	0.42042	-1.3107									497.25
	201.26	201.44	63.112	0.49038	-0.306592									497.25
	201.261	201.441	63.113	0.52044	0.124849									497.25
	201.262	201.442	63.114	0.43206	-1.14364									497.25
	201.263	201.443	63.115	0.4134	-1.41146									497.251
	201.264	201.444	63.116	0.41724	-1.35635									497.251
	201.265	201.445	63.117	0.44166	-1.00585									497.251
	201.266	201.446	63.118	0.4707	-0.589053									497.251
		201.447	63.119	0.51492	0.0456221									497.251
	201.267	201.447	63.12	0.55914	0.680297									497.252
	201.268	201.448	63.121	0.41934	-1.32621									497.252
	201.269	201.449	63.122	0.56004	0.693214									497.252
	201.27	201.45	63.123	0.46326	-0.695836									497.252
	201.272	201.452	63.124	0.47958	-0.461601									497.252
	201.273	201.453	63.125	0.54114	0.421949									497.252
	201.274	201.454	63.126	0.49218	-0.280757									497.252
	201.275	201.455	63.127	0.42846	-1.19531									497.253
	201.276	201.456	63.128	0.57444	0.899892									497.253
	201.277	201.457	63.129	0.56436	0.755218									497.253
		201.457	63.13	0.53394	0.31861									497.253
	201.278	201.458	63.131	0.50352	-0.117998									497.253
	201.279	201.459	63.132	0.52842	0.239383									497.253
	201.28	201.46	63.133	0.51432	0.0370105									497.254
	201.281	201.461	63.134	0.46056	-0.734589									497.254
	201.282	201.462	63.135	0.47358	-0.547717									497.254
	201.284	201.464	63.136	0.48426	-0.394431									497.254
	201.285	201.465	63.137	0.42954	-1.17981									497.254
	201.286	201.466	63.138	0.5037	-0.115415									497.255
	201.287	201.467	63.139	0.4743	-0.537383									497.255
	201.288	201.468	63.14	0.55944	0.684603									497.255
	201.289	201.469	63.141	0.47862	-0.47538									497.255
		201.469	63.142	0.4545	-0.821566									497.255
	201.29	201.47	63.143	0.43038	-1.16775									497.255
	201.291	201.471	63.144	0.50766	-0.0585782									497.255
	201.292	201.472	63.145	0.4872	-0.352234									497.256
	201.293	201.473	63.146	0.49044	-0.305731									497.256
	201.295	201.475	63.147	0.56736	0.798276									497.256
	201.296	201.476	63.148	0.50172	-0.143833									497.256
	201.297	201.477	63.149	0.46692	-0.643306									497.256
	201.298	201.478	63.15	0.52986	0.260051									497.257
	201.299	201.479	63.151	0.53802	0.377169									497.257
	201.3	201.48	63.152	0.5187	0.0998751									497.257
	201.301	201.481	63.153	0.49062	-0.303148									497.257
		201.481	63.154	0.46026	-0.738894									497.257
	201.302	201.482	63.155	0.4299	-1.17464									497.257
	201.303	201.483	63.156	0.49584	-0.228227									497.257
	201.304	201.484	63.157	0.4902	-0.309176									497.258
	201.305	201.485	63.158	0.52716	0.221299									497.258
	201.307	201.487	63.159	0.49476	-0.243728									497.258
	201.308	201.488	63.16	0.61764	1.51993									497.258
	201.309	201.489	63.161	0.69906	2.68852									497.258
	201.31	201.49	63.162	0.58884	1.10657									497.259
	201.311	201.491	63.163	0.53988	0.403865									497.259
	201.312	201.492	63.164	0.57504	0.908504									497.259
		201.493	63.165	0.5379	0.375446									497.259
	201.313	201.493	63.166	0.50076	-0.157612									497.259
	201.314	201.494	63.167	0.49428	-0.250617									497.259
	201.315	201.495	63.168	0.54882	0.532177									497.26
	201.316	201.496	63.169	0.54648	0.498592									497.26
	201.317	201.497	63.17	0.56208	0.722494									497.26
	201.319	201.499	63.171	0.4962	-0.22306									497.26
	201.32	201.5	63.172	0.50592	-0.0835519									497.26
	201.321	201.501	63.173	0.55128	0.567485									497.26
	201.322	201.502	63.174	0.54408	0.464146									497.26
	201.323	201.503	63.175	0.54264	0.443478									497.261
	201.324	201.504	63.176	0.54462	0.471896									497.261
		201.505	63.177	0.53433	0.324207									497.261
	201.325	201.505	63.178	0.52404	0.176518									497.261
	201.326	201.506	63.179	0.60216	1.29775									497.261
	201.327	201.507	63.18	0.57162	0.859418									497.262
	201.328	201.508	63.181	0.64362	1.89281									497.262
	201.33	201.51	63.182	0.59862	1.24694									497.262
	201.331	201.511	63.183	0.55944	0.684603									497.262
	201.332	201.512	63.184	0.53514	0.335833									497.262
	201.333	201.513	63.185	0.5829	1.02132									497.262
	201.334	201.514	63.186	0.54384	0.460701									497.262
	201.335	201.515	63.187	0.55998	0.692353									497.263
	201.336	201.516	63.188	0.60732	1.37181									497.263
		201.517	63.189	0.60507	1.33951									497.263
	201.337	201.517	63.19	0.60282	1.30722									497.263
	201.338	201.518	63.191	0.55818	0.666518									497.263
	201.339	201.519	63.192	0.62352	1.60432									497.264
	201.34	201.52	63.193	0.62004	1.55437									497.264
	201.342	201.522	63.194	0.57288	0.877502									497.264
	201.343	201.523	63.195	0.5871	1.0816									497.264
	201.344	201.524	63.196	0.58878	1.10571									497.264
	201.345	201.525	63.197	0.59718	1.22627									497.264
	201.346	201.526	63.198	0.60378	1.321									497.264
	201.347	201.527	63.199	0.59502	1.19527									497.265
		201.528	63.2	0.59901	1.25254									497.265
	201.348	201.528	63.201	0.603	1.3098									497.265
	201.349	201.529	63.202	0.5994	1.25813									497.265
	201.35	201.53	63.203	0.6078	1.3787									497.265
	201.351	201.531	63.204	0.58782	1.09193									497.265
	201.352	201.532	63.205	0.62796	1.66805									497.266
	201.354	201.534	63.206	0.62766	1.66374									497.266
	201.355	201.535	63.207	0.59658	1.21766									497.266
	201.356	201.536	63.208	0.63048	1.70422									497.266
	201.357	201.537	63.209	0.56988	0.834444									497.266
	201.358	201.538	63.21	0.62544	1.63188									497.267
	201.359	201.539	63.211	0.57012	0.837889									497.267
		201.54	63.212	0.59079	1.13456									497.267
	201.36	201.54	63.213	0.61146	1.43123									497.267
	201.361	201.541	63.214	0.59316	1.16857									497.267
	201.362	201.542	63.215	0.51294	0.0172038									497.267
	201.363	201.543	63.216	0.49062	-0.303148									497.267
	201.365	201.545	63.217	0.33894	-2.48016									497.268
	201.366	201.546	63.218	0.42114	-1.30037									497.268
	201.367	201.547	63.219	0.5763	0.926588									497.268
	201.368	201.548	63.22	0.47394	-0.54255									497.268
	201.369	201.549	63.221	0.5787	0.961035									497.268
	201.37	201.55	63.222	0.558	0.663935									497.269
	201.371	201.551	63.223	0.54042	0.411615									497.269
		201.552	63.224	0.53808	0.37803									497.269
	201.372	201.552	63.225	0.53574	0.344444									497.269
	201.373	201.553	63.226	0.47976	-0.459017									497.269
	201.374	201.554	63.227	0.56388	0.748328									497.269
	201.375	201.555	63.228	0.5757	0.917977									497.269
	201.377	201.557	63.229	0.56292	0.73455									497.27
	201.378	201.558	63.23	0.55632	0.639822									497.27
	201.379	201.559	63.231	0.52758	0.227327									497.27
	201.38	201.56	63.232	0.57564	0.917116									497.27
	201.381	201.561	63.233	0.51486	0.0447609									497.27
	201.382	201.562	63.234	0.54318	0.451228									497.271
		201.562	63.235	0.50331	-0.121012									497.271
	201.383	201.563	63.236	0.46344	-0.693253									497.271
	201.384	201.564	63.237	0.45744	-0.779369									497.271
	201.385	201.565	63.238	0.49626	-0.222199									497.271
	201.386	201.566	63.239	0.54432	0.46759									497.271
	201.387	201.567	63.24	0.49398	-0.254923									497.272
	201.389	201.569	63.241	0.50568	-0.0869965									497.272
	201.39	201.57	63.242	0.53046	0.268662									497.272
	201.391	201.571	63.243	0.52404	0.176518									497.272
	201.392	201.572	63.244	0.56682	0.790525									497.272
	201.393	201.573	63.245	0.52584	0.202353									497.272
	201.394	201.574	63.246	0.52644	0.210965									497.272
		201.575	63.247	0.52887	0.245842									497.273
	201.395	201.575	63.248	0.5313	0.280719									497.273
	201.396	201.576	63.249	0.57174	0.86114									497.273
	201.397	201.577	63.25	0.55866	0.673407									497.273
	201.398	201.578	63.251	0.54516	0.479647									497.273
	201.4	201.58	63.252	0.53244	0.297081									497.274
	201.401	201.581	63.253	0.52422	0.179102									497.274
	201.402	201.582	63.254	0.53592	0.347028									497.274
	201.403	201.583	63.255	0.49908	-0.181724									497.274
	201.404	201.584	63.256	0.49902	-0.182585									497.274
	201.405	201.585	63.257	0.51396	0.0318435									497.274
		201.586	63.258	0.49014	-0.310037									497.274
	201.406	201.586	63.259	0.46632	-0.651917									497.275
	201.407	201.587	63.26	0.50184	-0.142111									497.275
	201.408	201.588	63.261	0.54264	0.443478									497.275
	201.409	201.589	63.262	0.53436	0.324638									497.275
	201.41	201.59	63.263	0.55476	0.617432									497.275
	201.412	201.592	63.264	0.54768	0.515815									497.276
	201.413	201.593	63.265	0.54606	0.492564									497.276
	201.414	201.594	63.266	0.49866	-0.187752									497.276
	201.415	201.595	63.267	0.40206	-1.57422									497.276
	201.416	201.596	63.268	0.23394										497.276
	201.417	201.597	63.269	0.10788										497.276
		201.598	63.27	0.09693										497.276
	201.418	201.598	63.271	0.08598										497.277
	201.421	201.601	63.272	0.0597										497.277
	201.44	201.62	63.273	0.4956	0.820417								496.377	497.277	498.477
	201.441	201.621	63.274	0.4971	0.829717		A. pisiformis + L. laevigata							497.277
	201.442	201.622	63.275	0.47568	0.696917									497.277
	201.443	201.623	63.276	0.45024	0.539194									497.277
	201.444	201.624	63.277	0.48408	0.748995									497.278
	201.445	201.625	63.278	0.50556	0.882167									497.278
	201.446	201.626	63.279	0.54666	1.13698									497.278
	201.447	201.627	63.28	0.4875	0.770199									497.278
	201.448	201.628	63.281	0.52494	1.00232									497.278
	201.449	201.629	63.282	0.50904	0.903743									497.279
	201.45	201.63	63.283	0.51792	0.958797									497.279
	201.451	201.631	63.284	0.47214	0.674969									497.279
	201.452	201.632	63.285	0.4629	0.617683									497.279
	201.453	201.633	63.286	0.49884	0.840505									497.279
	201.454	201.634	63.287	0.42114	0.358779									497.279
	201.456	201.636	63.288	0.45888	0.59276									497.279
	201.457	201.637	63.289	0.45144	0.546633									497.28
	201.458	201.638	63.29	0.43674	0.455496									497.28
	201.459	201.639	63.291	0.4689	0.654882									497.28
	201.46	201.64	63.292	0.43902	0.469632									497.28
	201.461	201.641	63.293	0.43698	0.456984									497.28
	201.462	201.642	63.294	0.44442	0.503111									497.281
	201.463	201.643	63.295	0.45894	0.593132									497.281
		201.644	63.296	0.459	0.593504									497.281
	201.464	201.644	63.297	0.45906	0.593876									497.281
	201.465	201.645	63.298	0.42492	0.382214									497.281
	201.466	201.646	63.299	0.41424	0.316									497.281
	201.467	201.647	63.3	0.37938	0.0998747									497.281
	201.468	201.648	63.301	0.48078	0.728536									497.282
	201.469	201.649	63.302	0.54294	1.11392									497.282
	201.47	201.65	63.303	0.56622	1.25825									497.282
	201.471	201.651	63.304	0.5742	1.30772									497.282
	201.472	201.652	63.305	0.57048	1.28466									497.282
	201.473	201.653	63.306	0.35508	-0.0507808									497.283
	201.474	201.654	63.307	0.37542	0.0753234									497.283
	201.475	201.655	63.308	0.36186	-0.00874606									497.283
	201.476	201.656	63.309	0.33888	-0.151218									497.283
	201.477	201.657	63.31	0.3222	-0.254631									497.283
	201.478	201.658	63.311	0.31596	-0.293318									497.283
	201.479	201.659	63.312	0.2844	-0.488984									497.284
	201.48	201.66	63.313	0.3123	-0.316009									497.284
	201.481	201.661	63.314	0.3474	-0.0983954									497.284
	201.482	201.662	63.315	0.2949	-0.423886									497.284
	201.483	201.663	63.316	0.34182	-0.13299									497.284
	201.484	201.664	63.317	0.39744	0.211843									497.284
	201.486	201.666	63.318	0.39822	0.216679									497.284
	201.487	201.667	63.319	0.37062	0.0455643									497.285
	201.488	201.668	63.32	0.34842	-0.0920716									497.285
	201.489	201.669	63.321	0.37374	0.0649077									497.285
	201.49	201.67	63.322	0.42072	0.356175									497.285
	201.491	201.671	63.323	0.28842	-0.46406									497.285
	201.492	201.672	63.324	0.31824	-0.279182									497.286
	201.493	201.673	63.325	0.38286	0.12145									497.286
		201.673	63.326	0.30003	-0.392081									497.286
	201.494	201.674	63.327	0.2172	-0.905611									497.286
	201.495	201.675	63.328	0.33198	-0.193997									497.286
	201.496	201.676	63.329	0.36222	-0.00651413									497.286
	201.497	201.677	63.33	0.35706	-0.0385052									497.286
	201.498	201.678	63.331	0.37656	0.0823912									497.287
	201.499	201.679	63.332	0.39966	0.225607									497.287
	201.5	201.68	63.333	0.41262	0.305957									497.287
	201.501	201.681	63.334	0.37302	0.0604439									497.287
	201.502	201.682	63.335	0.40164	0.237883									497.287
	201.503	201.683	63.336	0.4098	0.288473									497.288
	201.504	201.684	63.337	0.31482	-0.300385									497.288
	201.505	201.685	63.338	0.39414	0.191384									497.288
	201.506	201.686	63.339	0.52656	1.01236									497.288
	201.507	201.687	63.34	0.4878	0.772059									497.288
	201.508	201.688	63.341	0.4827	0.74044									497.288
	201.509	201.689	63.342	0.47262	0.677945									497.288
	201.51	201.69	63.343	0.6306	1.65739									497.289
	201.511	201.691	63.344	0.60576	1.50339									497.289
	201.518	201.698	63.345	0.05496	-1.91147									497.289
	201.528	201.708	63.346	0.03984	-2.00521									497.289
	201.529	201.709	63.347	0.0279	-2.07924									497.289
	201.544	201.724	63.348	0.03492	-2.03571									497.289
	201.548	201.728	63.349	0.04842	-1.95202									497.29
	201.549	201.729	63.35	0.0438	-1.98066									497.29
	201.561	201.741	63.351	0.05874	-1.88803									497.29
	201.572	201.752	63.352	0.04374	-1.98103									497.29
	201.578	201.758	63.353	0.03168	-2.0558									497.29
	201.579	201.759	63.354	0.03132	-2.05803									497.291
	201.581	201.761	63.355	0.0333	-2.04576									497.291
	201.583	201.763	63.356	0.02886	-2.07328									497.291
		201.764	63.357	0.05703	-1.89864									497.291
	201.584	201.764	63.358	0.0852	-1.72399									497.291
	201.585	201.765	63.359	0.2388										497.291
	201.586	201.766	63.36	0.3378										497.291
	201.587	201.767	63.361	0.46626	-0.280032									497.292
	201.588	201.768	63.362	0.54978	0.691781									497.292
	201.589	201.769	63.363	0.5601	0.811861									497.292
	201.59	201.77	63.364	0.5655	0.874694									497.292
	201.591	201.771	63.365	0.5166	0.305709									497.292
	201.592	201.772	63.366	0.54684	0.657572									497.293
	201.593	201.773	63.367	0.54978	0.691781									497.293
	201.594	201.774	63.368	0.56484	0.867015									497.293
	201.595	201.775	63.369	0.54426	0.627552									497.293
	201.596	201.776	63.37	0.5481	0.672233									497.293
	201.597	201.777	63.371	0.55782	0.785332									497.293
	201.598	201.778	63.372	0.50586	0.180741									497.293
	201.599	201.779	63.373	0.54252	0.607306									497.294
	201.6	201.78	63.374	0.49764	0.0850959									497.294
	201.601	201.781	63.375	0.54618	0.649893									497.294
	201.602	201.782	63.376	0.5265	0.420902									497.294
	201.603	201.783	63.377	0.50304	0.147929									497.294
	201.604	201.784	63.378	0.47352	-0.195557									497.295
	201.605	201.785	63.379	0.51642	0.303614									497.295
	201.607	201.787	63.38	0.52122	0.359466									497.295
	201.608	201.788	63.381	0.33504	-1.80687									497.295
	201.609	201.789	63.382	0.43092	-0.691238									497.295
	201.61	201.79	63.383	0.6051	1.33547									497.295
	201.611	201.791	63.384	0.45096	-0.458058									497.296
	201.612	201.792	63.385	0.5592	0.801389									497.296
	201.613	201.793	63.386	0.5454	0.640817									497.296
		201.793	63.387	0.522	0.368541									497.296
	201.614	201.794	63.388	0.4986	0.0962661									497.296
	201.615	201.795	63.389	0.54006	0.578682									497.296
	201.616	201.796	63.39	0.49956	0.107436									497.296
	201.617	201.797	63.391	0.43872	-0.600479									497.297
	201.618	201.798	63.392	0.43056	-0.695427									497.297
	201.619	201.799	63.393	0.50628	0.185628									497.297
	201.62	201.8	63.394	0.31752	-2.01073									497.297
	201.621	201.801	63.395	0.35592	-1.56391									497.297
	201.622	201.802	63.396	0.46686	-0.273051									497.298
	201.623	201.803	63.397	0.50592	0.181439									497.298
	201.624	201.804	63.398	0.52128	0.360164									497.298
	201.625	201.805	63.399	0.52008	0.346201									497.298
	201.626	201.806	63.4	0.42744	-0.73173									497.298
	201.627	201.807	63.401	0.3624	-1.48852									497.298
	201.628	201.808	63.402	0.34788	-1.65747									497.298
	201.629	201.809	63.403	0.30606	-2.14407									497.299
	201.63	201.81	63.404	0.34986	-1.63443									497.299
	201.631	201.811	63.405	0.30774	-2.12452									497.299
	201.632	201.812	63.406	0.3273	-1.89693									497.299
	201.633	201.813	63.407	0.3963	-1.09407									497.299
	201.634	201.814	63.408	0.30498	-2.15664									497.3
	201.635	201.815	63.409	0.28662	-2.37027									497.3
	201.637	201.817	63.41	0.38418	-1.23509									497.3
	201.638	201.818	63.411	0.35052	-1.62675									497.3
	201.639	201.819	63.412	0.37008	-1.39915									497.3
	201.64	201.82	63.413	0.4461	-0.514608									497.3
	201.641	201.821	63.414	0.48672	-0.0419659									497.3
	201.642	201.822	63.415	0.46008	-0.351941									497.301
	201.643	201.823	63.416	0.46932	-0.244427									497.301
		201.824	63.417	0.47808	-0.142498									497.301
	201.644	201.824	63.418	0.48684	-0.0405696									497.301
	201.645	201.825	63.419	0.46572	-0.286316									497.301
	201.646	201.826	63.42	0.42846	-0.719862									497.301
	201.647	201.827	63.421	0.41928	-0.826677									497.302
	201.648	201.828	63.422	0.42144	-0.801544									497.302
	201.649	201.829	63.423	0.44286	-0.552308									497.302
	201.65	201.83	63.424	0.43578	-0.634688									497.302
	201.651	201.831	63.425	0.30594	-2.14547									497.302
	201.652	201.832	63.426	0.45432	-0.418962									497.303
	201.653	201.833	63.427	0.4068	-0.971891									497.303
	201.654	201.834	63.428	0.49044	0.00131887									497.303
	201.655	201.835	63.429	0.4362	-0.629801									497.303
	201.656	201.836	63.43	0.42438	-0.767335									497.303
	201.657	201.837	63.431	0.40506	-0.992137									497.303
	201.658	201.838	63.432	0.4911	0.00899843									497.303
	201.659	201.839	63.433	0.48246	-0.091534									497.304
	201.66	201.84	63.434	0.50148	0.129777									497.304
	201.661	201.841	63.435	0.53298	0.496301									497.304
	201.662	201.842	63.436	0.54618	0.649893									497.304
	201.663	201.843	63.437	0.54306	0.613589									497.304
	201.664	201.844	63.438	0.51528	0.29035									497.305
	201.665	201.845	63.439	0.5244	0.396467									497.305
	201.666	201.846	63.44	0.4926	0.026452									497.305
	201.668	201.848	63.441	0.5337	0.504679									497.305
	201.669	201.849	63.442	0.50844	0.210761									497.305
	201.67	201.85	63.443	0.51924	0.336427									497.305
	201.671	201.851	63.444	0.528	0.438356									497.305
	201.672	201.852	63.445	0.54648	0.653383									497.306
	201.673	201.853	63.446	0.67848	2.1893									497.306
		201.853	63.447	0.6675	2.06154									497.306
	201.674	201.854	63.448	0.65652	1.93378									497.306
	201.675	201.855	63.449	0.54534	0.640119									497.306
	201.676	201.856	63.45	0.5556	0.759501									497.307
	201.677	201.857	63.451	0.64206	1.76552									497.307
	201.678	201.858	63.452	0.62766	1.59797									497.307
	201.679	201.859	63.453	0.65922	1.96519									497.307
	201.68	201.86	63.454	0.61884	1.49534									497.307
	201.681	201.861	63.455	0.62772	1.59867									497.307
	201.682	201.862	63.456	0.6363	1.6985									497.308
	201.683	201.863	63.457	0.62142	1.52536									497.308
	201.684	201.864	63.458	0.58362	1.08553									497.308
	201.685	201.865	63.459	0.54258	0.608004									497.308
	201.686	201.866	63.46	0.54012	0.57938									497.308
	201.687	201.867	63.461	0.49248	0.0250557									497.308
	201.688	201.868	63.462	0.4998	0.110229									497.308
	201.689	201.869	63.463	0.46716	-0.26956									497.309
	201.69	201.87	63.464	0.4884	-0.022418									497.309
	201.691	201.871	63.465	0.51642	0.303614									497.309
	201.692	201.872	63.466	0.4998	0.110229									497.309
	201.693	201.873	63.467	0.46362	-0.310751									497.309
	201.694	201.874	63.468	0.46698	-0.271655									497.31
	201.695	201.875	63.469	0.52086	0.355277									497.31
	201.696	201.876	63.47	0.52308	0.381108									497.31
	201.698	201.878	63.471	0.55434	0.74484									497.31
	201.699	201.879	63.472	0.552	0.717612									497.31
	201.7	201.88	63.473	0.5496	0.689687									497.31
	201.701	201.881	63.474	0.5487	0.679215									497.31
	201.702	201.882	63.475	0.5205	0.351088									497.311
	201.703	201.883	63.476	0.52362	0.387391									497.311
		201.884	63.477	0.513	0.26382									497.311
	201.704	201.884	63.478	0.50238	0.140249									497.311
	201.705	201.885	63.479	0.55884	0.7972									497.311
	201.706	201.886	63.48	0.50826	0.208667									497.312
	201.707	201.887	63.481	0.55956	0.805578									497.312
	201.708	201.888	63.482	0.50238	0.140249									497.312
	201.709	201.889	63.483	0.5823	1.07017									497.312
	201.71	201.89	63.484	0.51756	0.316879									497.312
	201.711	201.891	63.485	0.52482	0.401354									497.312
	201.712	201.892	63.486	0.54144	0.594739									497.312
	201.713	201.893	63.487	0.48474	-0.0650046									497.313
	201.714	201.894	63.488	0.45144	-0.452473									497.313
	201.715	201.895	63.489	0.5442	0.626854									497.313
	201.716	201.896	63.49	0.4908	0.00550772									497.313
	201.717	201.897	63.491	0.47058	-0.229766									497.313
	201.718	201.898	63.492	0.38862	-1.18343									497.313
	201.719	201.899	63.493	0.41952	-0.823885									497.314
	201.72	201.9	63.494	0.45876	-0.3673									497.314
	201.721	201.901	63.495	0.40656	-0.974683									497.314
	201.722	201.902	63.496	0.36642	-1.44174									497.314
	201.723	201.903	63.497	0.41196	-0.911851									497.314
	201.724	201.904	63.498	0.41844	-0.836451									497.315
	201.725	201.905	63.499	0.3537	-1.58975									497.315
	201.726	201.906	63.5	0.2448	-2.85687									497.315
	201.728	201.908	63.501	0.30024	-2.21179									497.315
	201.729	201.909	63.502	0.42288	-0.784789									497.315
	201.73	201.91	63.503	0.35184	-1.61139									497.315
	201.731	201.911	63.504	0.35022	-1.63024									497.315
	201.732	201.912	63.505	0.29766	-2.24181									497.316
	201.733	201.913	63.506	0.44184	-0.564176									497.316
	201.734	201.914	63.507	0.48666	-0.0426641									497.316
		201.915	63.508	0.46596	-0.283523									497.316
	201.735	201.915	63.509	0.44526	-0.524382									497.316
	201.736	201.916	63.51	0.38256	-1.25394									497.317
	201.737	201.917	63.511	0.20034	-3.3742									497.317
	201.738	201.918	63.512	0.51018	0.231008									497.317
	201.739	201.919	63.513	0.30252	-2.18526									497.317
	201.74	201.92	63.514	0.43782	-0.610951									497.317
	201.741	201.921	63.515	0.42948	-0.707993									497.317
	201.742	201.922	63.516	0.40956	-0.939776									497.317
	201.743	201.923	63.517	0.4443	-0.535552									497.318
	201.744	201.924	63.518	0.46506	-0.293995									497.318
	201.745	201.925	63.519	0.4605	-0.347054									497.318
	201.746	201.926	63.52	0.44364	-0.543232									497.318
	201.747	201.927	63.521	0.5277	0.434865									497.318
	201.748	201.928	63.522	0.49434	0.0466981									497.318
	201.749	201.929	63.523	0.29148	-2.31372									497.319
	201.75	201.93	63.524	0.57348	0.967547									497.319
	201.751	201.931	63.525	0.53052	0.467678									497.319
	201.752	201.932	63.526	0.51078	0.237989									497.319
	201.753	201.933	63.527	0.48138	-0.104101									497.319
	201.754	201.934	63.528	0.47352	-0.195557									497.32
	201.755	201.935	63.529	0.51444	0.280576									497.32
	201.756	201.936	63.53	0.54546	0.641515									497.32
	201.758	201.938	63.531	0.51534	0.291048									497.32
	201.759	201.939	63.532	0.55626	0.76718									497.32
	201.76	201.94	63.533	0.33528	-1.80408									497.32
	201.761	201.941	63.534	0.48786	-0.0287012									497.32
	201.762	201.942	63.535	0.55434	0.74484									497.321
	201.763	201.943	63.536	0.51678	0.307803									497.321
	201.764	201.944	63.537	0.47712	-0.153669									497.321
		201.945	63.538	0.5379	0.553549									497.321
	201.765	201.945	63.539	0.59868	1.26077									497.321
	201.766	201.946	63.54	0.57822	1.0227									497.322
	201.767	201.947	63.541	0.53874	0.563323									497.322
	201.768	201.948	63.542	0.57684	1.00664									497.322
	201.769	201.949	63.543	0.58734	1.12882									497.322
	201.77	201.95	63.544	0.56982	0.92496									497.322
	201.771	201.951	63.545	0.48834	-0.0231161									497.322
	201.772	201.952	63.546	0.53994	0.577286									497.322
	201.773	201.953	63.547	0.59478	1.21539									497.323
	201.774	201.954	63.548	0.57264	0.957773									497.323
	201.775	201.955	63.549	0.56052	0.816748									497.323
	201.776	201.956	63.55	0.5448	0.633835									497.323
	201.777	201.957	63.551	0.57516	0.987095									497.323
	201.778	201.958	63.552	0.47124	-0.222086									497.324
	201.779	201.959	63.553	0.38106	-1.27139									497.324
	201.78	201.96	63.554	0.53178	0.482339									497.324
	201.781	201.961	63.555	0.69036	2.32753									497.324
	201.782	201.962	63.556	0.68364	2.24934									497.324
	201.783	201.963	63.557	0.6456	1.80671									497.324
	201.784	201.964	63.558	0.59034	1.16372									497.325
	201.785	201.965	63.559	0.58458	1.0967									497.325
	201.786	201.966	63.56	0.6156	1.45764									497.325
	201.788	201.968	63.561	0.5682	0.906111									497.325
	201.789	201.969	63.562	0.58338	1.08274									497.325
	201.79	201.97	63.563	0.61416	1.44089									497.325
	201.791	201.971	63.564	0.58644	1.11835									497.325
	201.792	201.972	63.565	0.57756	1.01502									497.326
	201.793	201.973	63.566	0.48324	-0.0824581									497.326
	201.794	201.974	63.567	0.54198	0.601023									497.326
		201.975	63.568	0.54156	0.596136									497.326
	201.795	201.975	63.569	0.54114	0.591249									497.326
	201.796	201.976	63.57	0.48708	-0.0377771									497.327
	201.797	201.977	63.571	0.53352	0.502585									497.327
	201.798	201.978	63.572	0.59616	1.23144									497.327
	201.799	201.979	63.573	0.55878	0.796502									497.327
	201.8	201.98	63.574	0.59628	1.23284									497.327
	201.801	201.981	63.575	0.60924	1.38364									497.327
	201.802	201.982	63.576	0.5757	0.993378									497.327
	201.803	201.983	63.577	0.57666	1.00455									497.328
	201.804	201.984	63.578	0.4929	0.0299427									497.328
	201.805	201.985	63.579	0.56652	0.886563									497.328
	201.806	201.986	63.58	0.5733	0.965453									497.328
	201.807	201.987	63.581	0.54006	0.578682									497.328
	201.808	201.988	63.582	0.58686	1.12323									497.329
	201.809	201.989	63.583	0.56244	0.839089									497.329
	201.81	201.99	63.584	0.57192	0.949395									497.329
	201.811	201.991	63.585	0.57804	1.02061									497.329
	201.812	201.992	63.586	0.59106	1.1721									497.329
	201.813	201.993	63.587	0.61572	1.45904									497.329
	201.814	201.994	63.588	0.61194	1.41506									497.329
	201.815	201.995	63.589	0.60072	1.2845									497.33
	201.816	201.996	63.59	0.6285	1.60774									497.33
	201.817	201.997	63.591	0.4299	-0.703106									497.33
	201.819	201.999	63.592	0.59412	1.20771									497.33
	201.82	202	63.593	0.63426	1.67476									497.33
	201.821	202.001	63.594	0.61506	1.45136									497.33
	201.822	202.002	63.595	0.6189	1.49604									497.331
	201.823	202.003	63.596	0.6	1.27613									497.331
	201.824	202.004	63.597	0.55926	0.802087									497.331
		202.005	63.598	0.57276	0.959169									497.331
	201.825	202.005	63.599	0.58626	1.11625									497.331
	201.826	202.006	63.6	0.58344	1.08344									497.332
	201.827	202.007	63.601	0.61386	1.4374									497.332
	201.828	202.008	63.602	0.60732	1.3613									497.332
	201.829	202.009	63.603	0.57126	0.941716									497.332
	201.83	202.01	63.604	0.49818	0.0913792									497.332
	201.831	202.011	63.605	0.51966	0.341314									497.332
	201.832	202.012	63.606	0.5295	0.455809									497.332
	201.833	202.013	63.607	0.50118	0.126286									497.333
	201.834	202.014	63.608	0.38856	-1.18413									497.333
	201.835	202.015	63.609	0.32664	-1.90461									497.333
	201.836	202.016	63.61	0.5211	0.358069									497.333
	201.837	202.017	63.611	0.4839	-0.0747786									497.333
	201.838	202.018	63.612	0.46248	-0.324015									497.334
	201.839	202.019	63.613	0.37914	-1.29373									497.334
	201.84	202.02	63.614	0.3795	-1.28955									497.334
	201.841	202.021	63.615	0.30252	-2.18526									497.334
	201.842	202.022	63.616	0.38568	-1.21764									497.334
	201.843	202.023	63.617	0.44862	-0.485286									497.334
	201.844	202.024	63.618	0.4017	-1.03123									497.334
	201.845	202.025	63.619	0.35256	-1.60301									497.335
	201.846	202.026	63.62	0.37536	-1.33772									497.335
	201.847	202.027	63.621	0.30234	-2.18736									497.335
	201.849	202.029	63.622	0.35592	-1.56391									497.335
	201.85	202.03	63.623	0.3513	-1.61767									497.335
	201.851	202.031	63.624	0.30018	-2.21249									497.336
	201.852	202.032	63.625	0.32568	-1.91578									497.336
	201.853	202.033	63.626	0.29076	-2.3221									497.336
	201.854	202.034	63.627	0.45006	-0.468531									497.336
	201.855	202.035	63.628	0.44832	-0.488777									497.336
		202.036	63.629	0.43902	-0.596989									497.336
	201.856	202.036	63.63	0.42972	-0.705201									497.337
	201.857	202.037	63.631	0.43638	-0.627707									497.337
	201.858	202.038	63.632	0.5055	0.176552									497.337
	201.859	202.039	63.633	0.48582	-0.052438									497.337
	201.86	202.04	63.634	0.48498	-0.062212									497.337
	201.861	202.041	63.635	0.435	-0.643764									497.337
	201.862	202.042	63.636	0.4941	0.0439055									497.337
	201.863	202.043	63.637	0.48354	-0.0789674									497.338
	201.864	202.044	63.638	0.45072	-0.460851									497.338
	201.865	202.045	63.639	0.4803	-0.116667									497.338
	201.866	202.046	63.64	0.49518	0.0564721									497.338
	201.867	202.047	63.641	0.37884	-1.29722									497.338
	201.868	202.048	63.642	0.5235	0.385995									497.339
	201.869	202.049	63.643	0.51042	0.2338									497.339
	201.87	202.05	63.644	0.55356	0.735764									497.339
	201.871	202.051	63.645	0.49506	0.0550758									497.339
	201.872	202.052	63.646	0.50982	0.226819									497.339
	201.873	202.053	63.647	0.49506	0.0550758									497.339
	201.874	202.054	63.648	0.55662	0.771369									497.339
	201.875	202.055	63.649	0.50778	0.203082									497.34
	201.876	202.056	63.65	0.55122	0.708536									497.34
	201.877	202.057	63.651	0.5184	0.326653									497.34
	201.879	202.059	63.652	0.52722	0.42928									497.34
	201.88	202.06	63.653	0.41724	-0.850414									497.34
	201.881	202.061	63.654	0.52758	0.433469									497.341
	201.882	202.062	63.655	0.52656	0.4216									497.341
	201.883	202.063	63.656	0.57504	0.985699									497.341
	201.884	202.064	63.657	0.54078	0.58706									497.341
	201.885	202.065	63.658	0.49644	0.071133									497.341
		202.065	63.659	0.51468	0.283368									497.341
	201.886	202.066	63.66	0.53292	0.495603									497.341
	201.887	202.067	63.661	0.55116	0.707838									497.342
	201.888	202.068	63.662	0.53292	0.495603									497.342
	201.889	202.069	63.663	0.5058	0.180043									497.342
	201.89	202.07	63.664	0.53718	0.545171									497.342
	201.891	202.071	63.665	0.48192	-0.0978173									497.342
	201.892	202.072	63.666	0.4218	-0.797355									497.342
	201.893	202.073	63.667	0.50196	0.135362									497.343
	201.894	202.074	63.668	0.56766	0.899827									497.343
	201.895	202.075	63.669	0.50724	0.196799									497.343
	201.896	202.076	63.67	0.50316	0.149325									497.343
	201.897	202.077	63.671	0.57252	0.956377									497.343
	201.898	202.078	63.672	0.60222	1.30196									497.344
	201.899	202.079	63.673	0.62472	1.56376									497.344
	201.9	202.08	63.674	0.63258	1.65522									497.344
	201.901	202.081	63.675	0.67248	2.11948									497.344
	201.902	202.082	63.676	0.62928	1.61682									497.344
	201.903	202.083	63.677	0.59364	1.20212									497.344
	201.904	202.084	63.678	0.66492	2.03152									497.344
	201.905	202.085	63.679	0.62376	1.55259									497.345
	201.906	202.086	63.68	0.68196	2.22979									497.345
	201.907	202.087	63.681	0.603	1.31103									497.345
	201.909	202.089	63.682	0.62508	1.56795									497.345
	201.91	202.09	63.683	0.60156	1.29428									497.345
	201.911	202.091	63.684	0.60888	1.37945									497.346
	201.912	202.092	63.685	0.54648	0.653383									497.346
	201.913	202.093	63.686	0.58014	1.04504									497.346
	201.914	202.094	63.687	0.5601	0.811861									497.346
	201.915	202.095	63.688	0.52122	0.359466									497.346
		202.096	63.689	0.5034	0.152117									497.346
	201.916	202.096	63.69	0.48558	-0.0552306									497.346
	201.917	202.097	63.691	0.45564	-0.403603									497.347
	201.918	202.098	63.692	0.51348	0.269405									497.347
	201.919	202.099	63.693	0.50028	0.115814									497.347
	201.92	202.1	63.694	0.50652	0.188421									497.347
	201.921	202.101	63.695	0.55212	0.719009									497.347
	201.922	202.102	63.696	0.42684	-0.738711									497.348
	201.923	202.103	63.697	0.46494	-0.295391									497.348
	201.924	202.104	63.698	0.41088	-0.924417									497.348
	201.925	202.105	63.699	0.46236	-0.325411									497.348
	201.926	202.106	63.7	0.53466	0.515849									497.348
	201.927	202.107	63.701	0.49038	0.000620725									497.348
	201.928	202.108	63.702	0.48708	-0.0377771									497.349
	201.929	202.109	63.703	0.51306	0.264518									497.349
	201.93	202.11	63.704	0.52152	0.362956									497.349
	201.931	202.111	63.705	0.49392	0.0418111									497.349
	201.932	202.112	63.706	0.44418	-0.536948									497.349
	201.933	202.113	63.707	0.4173	-0.849716									497.349
	201.934	202.114	63.708	0.46122	-0.338676									497.349
	201.935	202.115	63.709	0.546	0.647798									497.35
	201.936	202.116	63.71	0.47916	-0.129932									497.35
	201.937	202.117	63.711	0.49422	0.0453018									497.35
	201.938	202.118	63.712	0.51486	0.285463									497.35
	201.94	202.12	63.713	0.43512	-0.642368									497.35
	201.941	202.121	63.714	0.4581	-0.37498									497.351
	201.942	202.122	63.715	0.5256	0.41043									497.351
	201.943	202.123	63.716	0.54366	0.620571									497.351
	201.944	202.124	63.717	0.4626	-0.322619									497.351
	201.945	202.125	63.718	0.52602	0.415317									497.351
		202.125	63.719	0.51168	0.248461									497.351
	201.946	202.126	63.72	0.49734	0.0816052									497.351
	201.947	202.127	63.721	0.43878	-0.599781									497.352
	201.948	202.128	63.722	0.53418	0.510264									497.352
	201.949	202.129	63.723	0.48876	-0.0182291									497.352
	201.95	202.13	63.724	0.50244	0.140947									497.352
	201.951	202.131	63.725	0.53988	0.576588									497.352
	201.952	202.132	63.726	0.52938	0.454413									497.353
	201.953	202.133	63.727	0.52122	0.359466									497.353
	201.954	202.134	63.728	0.52314	0.381806									497.353
	201.955	202.135	63.729	0.4986	0.0962661									497.353
	201.956	202.136	63.73	0.50184	0.133966									497.353
	201.957	202.137	63.731	0.43794	-0.609555									497.353
	201.958	202.138	63.732	0.41706	-0.852509									497.353
	201.959	202.139	63.733	0.53724	0.545869									497.354
	201.96	202.14	63.734	0.52596	0.414619									497.354
	201.961	202.141	63.735	0.52542	0.408336									497.354
	201.962	202.142	63.736	0.53682	0.540982									497.354
	201.963	202.143	63.737	0.52638	0.419506									497.354
	201.964	202.144	63.738	0.42894	-0.714276									497.354
	201.965	202.145	63.739	0.39882	-1.06474									497.355
	201.966	202.146	63.74	0.45756	-0.381263									497.355
	201.967	202.147	63.741	0.48498	-0.062212									497.355
	201.968	202.148	63.742	0.46926	-0.245125									497.355
	201.97	202.15	63.743	0.42942	-0.708691									497.355
	201.971	202.151	63.744	0.45378	-0.425246									497.356
	201.972	202.152	63.745	0.46536	-0.290504									497.356
	201.973	202.153	63.746	0.4596	-0.357526									497.356
	201.974	202.154	63.747	0.44868	-0.484588									497.356
	201.975	202.155	63.748	0.42894	-0.714276									497.356
		202.156	63.749	0.41589	-0.866122									497.356
	201.976	202.156	63.75	0.40284	-1.01797									497.356
	201.977	202.157	63.751	0.4254	-0.755467									497.357
	201.978	202.158	63.752	0.40074	-1.0424									497.357
	201.979	202.159	63.753	0.40548	-0.98725									497.357
	201.98	202.16	63.754	0.33006	-1.86481									497.357
	201.981	202.161	63.755	0.45288	-0.435718									497.357
	201.982	202.162	63.756	0.45084	-0.459455									497.358
	201.983	202.163	63.757	0.34236	-1.72169									497.358
	201.984	202.164	63.758	0.52206	0.36924									497.358
	201.985	202.165	63.759	0.47088	-0.226275									497.358
	201.986	202.166	63.76	0.46452	-0.300278									497.358
	201.987	202.167	63.761	0.42342	-0.778505									497.358
	201.988	202.168	63.762	0.45744	-0.382659									497.358
	201.989	202.169	63.763	0.4596	-0.357526									497.359
	201.99	202.17	63.764	0.45504	-0.410585									497.359
	201.991	202.171	63.765	0.5013	0.127683									497.359
	201.992	202.172	63.766	0.53652	0.537492									497.359
	201.993	202.173	63.767	0.47706	-0.154367									497.359
	201.994	202.174	63.768	0.5418	0.598928									497.36
	201.995	202.175	63.769	0.49896	0.100455									497.36
	201.996	202.176	63.77	0.5286	0.445337									497.36
	201.997	202.177	63.771	0.45798	-0.376376									497.36
	201.998	202.178	63.772	0.47958	-0.125045									497.36
	202	202.18	63.773	0.4671	-0.270258									497.36
	202.001	202.181	63.774	0.47466	-0.182292									497.361
	202.002	202.182	63.775	0.4569	-0.388942									497.361
	202.003	202.183	63.776	0.51954	0.339918									497.361
	202.004	202.184	63.777	0.46356	-0.311449									497.361
	202.005	202.185	63.778	0.53478	0.517246									497.361
	202.006	202.186	63.779	0.50754	0.200289									497.361
		202.187	63.78	0.49722	0.0802089									497.361
	202.007	202.187	63.781	0.4869	-0.0398715									497.362
	202.008	202.188	63.782	0.49758	0.0843977									497.362
	202.009	202.189	63.783	0.47682	-0.157159									497.362
	202.01	202.19	63.784	0.48012	-0.118762									497.362
	202.011	202.191	63.785	0.40692	-0.970494									497.362
	202.012	202.192	63.786	0.40818	-0.955833									497.363
	202.013	202.193	63.787	0.3702	-1.39776									497.363
	202.014	202.194	63.788	0.48882	-0.017531									497.363
	202.015	202.195	63.789	0.52062	0.352484									497.363
	202.016	202.196	63.79	0.47556	-0.17182									497.363
	202.017	202.197	63.791	0.42372	-0.775015									497.363
	202.018	202.198	63.792	0.53754	0.54936									497.363
	202.019	202.199	63.793	0.50004	0.113022									497.364
	202.02	202.2	63.794	0.48462	-0.0664009									497.364
	202.021	202.201	63.795	0.48072	-0.11178									497.364
	202.022	202.202	63.796	0.54942	0.687592									497.364
	202.023	202.203	63.797	0.54558	0.642911									497.364
	202.024	202.204	63.798	0.5466	0.65478									497.365
	202.025	202.205	63.799	0.50682	0.191912									497.365
	202.026	202.206	63.8	0.51684	0.308501									497.365
	202.027	202.207	63.801	0.48588	-0.0517399									497.365
	202.028	202.208	63.802	0.43068	-0.69403									497.365
	202.03	202.21	63.803	0.52674	0.423695									497.365
	202.031	202.211	63.804	0.52572	0.411826									497.365
	202.032	202.212	63.805	0.49332	0.0348297									497.366
	202.033	202.213	63.806	0.48174	-0.0999117									497.366
	202.034	202.214	63.807	0.44934	-0.476908									497.366
	202.035	202.215	63.808	0.48444	-0.0684953									497.366
	202.036	202.216	63.809	0.36426	-1.46687									497.366
		202.216	63.81	0.35391	-1.5873									497.366
	202.037	202.217	63.811	0.34356	-1.70773									497.367
	202.038	202.218	63.812	0.48216	-0.0950247									497.367
	202.039	202.219	63.813	0.48912	-0.0140403									497.367
	202.04	202.22	63.814	0.55038	0.698762									497.367
	202.041	202.221	63.815	0.49386	0.0411129									497.367
	202.042	202.222	63.816	0.47268	-0.205331									497.368
	202.043	202.223	63.817	0.46392	-0.30726									497.368
	202.044	202.224	63.818	0.47976	-0.12295									497.368
	202.045	202.225	63.819	0.53082	0.471168									497.368
	202.046	202.226	63.82	0.53958	0.573097									497.368
	202.047	202.227	63.821	0.51918	0.335729									497.368
	202.048	202.228	63.822	0.51234	0.256141									497.368
	202.049	202.229	63.823	0.5097	0.225422									497.369
	202.05	202.23	63.824	0.51756	0.316879									497.369
	202.051	202.231	63.825	0.49632	0.0697368									497.369
	202.052	202.232	63.826	0.49494	0.0536795									497.369
	202.053	202.233	63.827	0.48126	-0.105497									497.369
	202.054	202.234	63.828	0.51372	0.272198									497.37
	202.055	202.235	63.829	0.52362	0.387391									497.37
	202.056	202.236	63.83	0.51114	0.242178									497.37
	202.057	202.237	63.831	0.46836	-0.255597									497.37
	202.058	202.238	63.832	0.5067	0.190515									497.37
	202.06	202.24	63.833	0.47406	-0.189274									497.37
	202.061	202.241	63.834	0.48954	-0.00915326									497.37
	202.062	202.242	63.835	0.47256	-0.206727									497.371
	202.063	202.243	63.836	0.48102	-0.108289									497.371
	202.064	202.244	63.837	0.50178	0.133268									497.371
	202.065	202.245	63.838	0.47034	-0.232559									497.371
	202.066	202.246	63.839	0.4476	-0.497154									497.371
		202.247	63.84	0.45525	-0.408141									497.372
	202.067	202.247	63.841	0.4629	-0.319128									497.372
	202.068	202.248	63.842	0.42816	-0.723352									497.372
	202.069	202.249	63.843	0.46758	-0.264673									497.372
	202.07	202.25	63.844	0.51648	0.304312									497.372
	202.071	202.251	63.845	0.50898	0.217045									497.372
	202.072	202.252	63.846	0.43728	-0.617235									497.373
	202.073	202.253	63.847	0.42672	-0.740108									497.373
	202.074	202.254	63.848	0.43266	-0.670992									497.373
	202.075	202.255	63.849	0.44874	-0.48389									497.373
	202.076	202.256	63.85	0.5064	0.187025									497.373
	202.077	202.257	63.851	0.5211	0.358069									497.373
	202.078	202.258	63.852	0.53838	0.559134									497.373
	202.079	202.259	63.853	0.4776	-0.148083									497.374
	202.08	202.26	63.854	0.48732	-0.0349845									497.374
	202.081	202.261	63.855	0.47274	-0.204633									497.374
	202.082	202.262	63.856	0.51324	0.266613									497.374
	202.083	202.263	63.857	0.4986	0.0962661									497.374
	202.084	202.264	63.858	0.30276	-2.18247									497.375
	202.085	202.265	63.859	0.49608	0.0669442									497.375
	202.086	202.266	63.86	0.48354	-0.0789674									497.375
	202.087	202.267	63.861	0.47148	-0.219294									497.375
	202.088	202.268	63.862	0.38694	-1.20298									497.375
	202.089	202.269	63.863	0.41256	-0.904869									497.375
	202.091	202.271	63.864	0.39162	-1.14852									497.375
	202.092	202.272	63.865	0.3687	-1.41521									497.376
	202.093	202.273	63.866	0.45552	-0.405									497.376
	202.094	202.274	63.867	0.46656	-0.276542									497.376
	202.095	202.275	63.868	0.46716	-0.26956									497.376
	202.096	202.276	63.869	0.39096	-1.1562									497.376
		202.276	63.87	0.45573	-0.402556									497.377
	202.097	202.277	63.871	0.5205	0.351088									497.377
	202.098	202.278	63.872	0.53136	0.477452									497.377
	202.099	202.279	63.873	0.42594	-0.749184									497.377
	202.1	202.28	63.874	0.4758	-0.169028									497.377
	202.101	202.281	63.875	0.38328	-1.24556									497.377
	202.102	202.282	63.876	0.36522	-1.4557									497.377
	202.103	202.283	63.877	0.36006	-1.51574									497.378
	202.104	202.284	63.878	0.44496	-0.527873									497.378
	202.105	202.285	63.879	0.46662	-0.275843									497.378
	202.106	202.286	63.88	0.3675	-1.42917									497.378
	202.107	202.287	63.881	0.41082	-0.925115									497.378
	202.108	202.288	63.882	0.49422	0.0453018									497.379
	202.109	202.289	63.883	0.45564	-0.403603									497.379
	202.11	202.29	63.884	0.49746	0.0830015									497.38
	202.111	202.291	63.885	0.35292	-1.59882									497.38
	202.112	202.292	63.886	0.31764	-2.00933									497.381
	202.113	202.293	63.887	0.40266	-1.02006									497.381
	202.114	202.294	63.888	0.35298	-1.59812									497.382
	202.115	202.295	63.889	0.22902	-3.04048									497.382
	202.116	202.296	63.89	0.29892	-2.22715									497.382
	202.117	202.297	63.891	0.387	-1.20228									497.383
	202.118	202.298	63.892	0.38136	-1.2679									497.383
	202.119	202.299	63.893	0.3402	-1.74683									497.384
	202.121	202.301	63.894	0.34188	-1.72728									497.384
	202.122	202.302	63.895	0.3573	-1.54786									497.385
	202.123	202.303	63.896	0.2811	-2.4345									497.385
	202.124	202.304	63.897	0.24624	-2.84012									497.386
	202.125	202.305	63.898	0.28398	-2.40099									497.386
	202.126	202.306	63.899	0.27732	-2.47848									497.387
		202.307	63.9	0.33777	-1.7751									497.387
	202.127	202.307	63.901	0.39822	-1.07173									497.387
	202.128	202.308	63.902	0.35382	-1.58835									497.388
	202.129	202.309	63.903	0.43968	-0.589309									497.388
	202.13	202.31	63.904	0.41016	-0.932795									497.389
	202.131	202.311	63.905	0.36192	-1.4941									497.389
	202.132	202.312	63.906	0.28308	-2.41146									497.39
	202.133	202.313	63.907	0.28572	-2.38074									497.39
	202.134	202.314	63.908	0.49518	0.0564721									497.391
	202.135	202.315	63.909	0.4212	-0.804337									497.391
	202.136	202.316	63.91	0.3819	-1.26162									497.392
	202.137	202.317	63.911	0.4431	-0.549515									497.392
	202.138	202.318	63.912	0.40512	-0.991439									497.393
	202.139	202.319	63.913	0.42492	-0.761052									497.393
	202.14	202.32	63.914	0.4398	-0.587913									497.394
	202.141	202.321	63.915	0.3231	-1.9458									497.394
	202.142	202.322	63.916	0.25362	-2.75425									497.394
	202.143	202.323	63.917	0.37164	-1.381									497.395
	202.144	202.324	63.918	0.46218	-0.327506									497.395
	202.145	202.325	63.919	0.4176	-0.846225									497.396
	202.146	202.326	63.92	0.43458	-0.648651									497.396
	202.147	202.327	63.921	0.47742	-0.150178									497.397
	202.148	202.328	63.922	0.42438	-0.767335									497.397
	202.149	202.329	63.923	0.42546	-0.754769									497.398
	202.151	202.331	63.924	0.50436	0.163288									497.398
	202.152	202.332	63.925	0.48222	-0.0943266									497.399
	202.153	202.333	63.926	0.47214	-0.211614									497.399
	202.154	202.334	63.927	0.5301	0.462791									497.399
	202.155	202.335	63.928	0.4803	-0.116667									497.4
	202.156	202.336	63.929	0.45354	-0.428038									497.401
	202.157	202.337	63.93	0.56178	0.831409									497.401
		202.338	63.931	0.52527	0.40659									497.401
	202.158	202.338	63.932	0.48876	-0.0182291									497.402
	202.159	202.339	63.933	0.50988	0.227517									497.402
	202.16	202.34	63.934	0.48522	-0.0594195									497.403
	202.161	202.341	63.935	0.44052	-0.579535									497.403
	202.162	202.342	63.936	0.40896	-0.946758									497.404
	202.163	202.343	63.937	0.49932	0.104644									497.404
	202.164	202.344	63.938	0.45834	-0.372187									497.405
	202.165	202.345	63.939	0.44658	-0.509023									497.405
	202.166	202.346	63.94	0.49992	0.111625									497.406
	202.167	202.347	63.941	0.5115	0.246367									497.406
	202.168	202.348	63.942	0.4962	0.0683405									497.406
	202.169	202.349	63.943	0.4902	-0.0014737									497.407
	202.17	202.35	63.944	0.46722	-0.268862									497.407
	202.171	202.351	63.945	0.45468	-0.414774									497.408
	202.172	202.352	63.946	0.5022	0.138155									497.408
	202.173	202.353	63.947	0.3372	-1.78174									497.409
	202.174	202.354	63.948	0.47454	-0.183689									497.409
	202.175	202.355	63.949	0.49308	0.0320371									497.41
	202.176	202.356	63.95	0.44124	-0.571157									497.41
	202.177	202.357	63.951	0.46494	-0.295391									497.411
	202.178	202.358	63.952	0.50166	0.131871									497.411
	202.179	202.359	63.953	0.44826	-0.489475									497.411
	202.181	202.361	63.954	0.55068	0.702253									497.412
	202.182	202.362	63.955	0.6408	1.75086									497.413
	202.183	202.363	63.956	0.59784	1.25099									497.413
	202.184	202.364	63.957	0.5811	1.05621									497.413
	202.185	202.365	63.958	0.57546	0.990586									497.414
	202.186	202.366	63.959	0.57402	0.97383									497.414
	202.187	202.367	63.96	0.58494	1.10089									497.415
		202.368	63.961	0.58713	1.12637									497.415
	202.188	202.368	63.962	0.58932	1.15186									497.416
	202.189	202.369	63.963	0.55188	0.716216									497.416
	202.19	202.37	63.964	0.55806	0.788125									497.417
	202.191	202.371	63.965	0.51912	0.335031									497.417
	202.192	202.372	63.966	0.48468	-0.0657027									497.418
	202.193	202.373	63.967	0.44904	-0.480399									497.418
	202.194	202.374	63.968	0.46014	-0.351243									497.418
	202.195	202.375	63.969	0.48606	-0.0496455									497.419
	202.196	202.376	63.97	0.46602	-0.282825									497.419
	202.197	202.377	63.971	0.48174	-0.0999117									497.42
	202.198	202.378	63.972	0.5241	0.392976									497.42
	202.199	202.379	63.973	0.51906	0.334332									497.421
	202.2	202.38	63.974	0.5001	0.11372									497.421
	202.201	202.381	63.975	0.55506	0.753218									497.422
	202.202	202.382	63.976	0.47892	-0.132724									497.422
	202.203	202.383	63.977	0.4719	-0.214407									497.423
	202.204	202.384	63.978	0.4788	-0.134121									497.423
	202.205	202.385	63.979	0.50634	0.186326									497.423
	202.206	202.386	63.98	0.53508	0.520736									497.424
	202.207	202.387	63.981	0.50148	0.129777									497.425
	202.208	202.388	63.982	0.4674	-0.266768									497.425
	202.209	202.389	63.983	0.43104	-0.689841									497.425
	202.211	202.391	63.984	0.45426	-0.419661									497.426
	202.212	202.392	63.985	0.51138	0.24497									497.426
	202.213	202.393	63.986	0.48744	-0.0335882									497.427
	202.214	202.394	63.987	0.44916	-0.479003									497.427
	202.215	202.395	63.988	0.49836	0.0934736									497.428
	202.216	202.396	63.989	0.48744	-0.0335882									497.428
	202.217	202.397	63.99	0.345	-1.69098									497.429
		202.398	63.991	0.40275	-1.01902									497.429
	202.218	202.398	63.992	0.4605	-0.347054									497.43
	202.219	202.399	63.993	0.47976	-0.12295									497.43
	202.22	202.4	63.994	0.46008	-0.351941									497.43
	202.221	202.401	63.995	0.44994	-0.469927									497.431
	202.222	202.402	63.996	0.43032	-0.698219									497.431
	202.223	202.403	63.997	0.4107	-0.926512									497.432
	202.224	202.404	63.998	0.4551	-0.409887									497.432
	202.225	202.405	63.999	0.29772	-2.24111									497.433
	202.226	202.406	64	0.4368	-0.62282									497.433
	202.227	202.407	64.001	0.44946	-0.475512									497.434
	202.228	202.408	64.002	0.4086	-0.950946									497.434
	202.229	202.409	64.003	0.49458	0.0494906									497.435
	202.23	202.41	64.004	0.44418	-0.536948									497.435
	202.231	202.411	64.005	0.44382	-0.541137									497.436
	202.232	202.412	64.006	0.4512	-0.455266									497.436
	202.233	202.413	64.007	0.4101	-0.933493									497.437
	202.234	202.414	64.008	0.38952	-1.17296									497.437
	202.235	202.415	64.009	0.35568	-1.56671									497.437
	202.236	202.416	64.01	0.44166	-0.56627									497.438
	202.237	202.417	64.011	0.41058	-0.927908									497.438
	202.238	202.418	64.012	0.43698	-0.620725									497.439
	202.239	202.419	64.013	0.37134	-1.38449									497.439
	202.24	202.42	64.014	0.33054	-1.85923									497.44
	202.242	202.422	64.015	0.33402	-1.81874									497.44
	202.243	202.423	64.016	0.37944	-1.29024									497.441
	202.244	202.424	64.017	0.32124	-1.96744									497.441
	202.245	202.425	64.018	0.34176	-1.72868									497.442
	202.246	202.426	64.019	0.27162	-2.5448									497.442
	202.247	202.427	64.02	0.2925	-2.30185									497.442
		202.428	64.021	0.34023	-1.74648									497.443
	202.248	202.428	64.022	0.38796	-1.19111									497.443
	202.249	202.429	64.023	0.3228	-1.94929									497.444
	202.25	202.43	64.024	0.30054	-2.2083									497.444
	202.251	202.431	64.025	0.38358	-1.24207									497.445
	202.252	202.432	64.026	0.33834	-1.76847									497.445
	202.253	202.433	64.027	0.26826	-2.5839									497.446
	202.254	202.434	64.028	0.31938	-1.98908									497.446
	202.255	202.435	64.029	0.32562	-1.91648									497.447
	202.256	202.436	64.03	0.38592	-1.21484									497.447
	202.257	202.437	64.031	0.37428	-1.35028									497.448
	202.258	202.438	64.032	0.4221	-0.793865									497.448
	202.259	202.439	64.033	0.36678	-1.43755									497.449
	202.26	202.44	64.034	0.40608	-0.980268									497.449
	202.261	202.441	64.035	0.30348	-2.17409									497.449
	202.262	202.442	64.036	0.39696	-1.08639									497.45
	202.263	202.443	64.037	0.42258	-0.788279									497.45
	202.264	202.444	64.038	0.44832	-0.488777									497.451
	202.265	202.445	64.039	0.4713	-0.221388									497.451
	202.266	202.446	64.04	0.46728	-0.268164									497.452
	202.267	202.447	64.041	0.43536	-0.639575									497.452
	202.268	202.448	64.042	0.46218	-0.327506									497.453
	202.269	202.449	64.043	0.4437	-0.542534									497.453
	202.27	202.45	64.044	0.48024	-0.117365									497.454
	202.272	202.452	64.045	0.44454	-0.53276									497.454
	202.273	202.453	64.046	0.4035	-1.01029									497.454
	202.274	202.454	64.047	0.4746	-0.182991									497.455
	202.275	202.455	64.048	0.4716	-0.217898									497.455
	202.276	202.456	64.049	0.4983	0.0927754									497.456
	202.277	202.457	64.05	0.38508	-1.22462									497.456
	202.278	202.458	64.051	0.51204	0.25265									497.457
		202.459	64.052	0.5025	0.141645									497.457
	202.279	202.459	64.053	0.49296	0.0306408									497.458
	202.28	202.46	64.054	0.38562	-1.21833									497.458
	202.281	202.461	64.055	0.49038	0.000620725									497.459
	202.282	202.462	64.056	0.53868	0.562625									497.459
	202.283	202.463	64.057	0.51768	0.318275									497.46
	202.284	202.464	64.058	0.51726	0.313388									497.46
	202.285	202.465	64.059	0.50148	0.129777									497.461
	202.286	202.466	64.06	0.41598	-0.865075									497.461
	202.287	202.467	64.061	0.51606	0.299425									497.461
	202.288	202.468	64.062	0.54132	0.593343									497.462
	202.289	202.469	64.063	0.52494	0.40275									497.462
	202.29	202.47	64.064	0.5331	0.497698									497.463
	202.291	202.471	64.065	0.57096	0.938225									497.463
	202.292	202.472	64.066	0.56496	0.868411									497.464
	202.293	202.473	64.067	0.5406	0.584965									497.464
	202.294	202.474	64.068	0.56976	0.924262									497.465
	202.295	202.475	64.069	0.55956	0.805578									497.465
	202.296	202.476	64.07	0.52644	0.420204									497.466
	202.297	202.477	64.071	0.53682	0.540982									497.466
	202.298	202.478	64.072	0.52104	0.357371									497.466
	202.299	202.479	64.073	0.52914	0.45162									497.467
	202.3	202.48	64.074	0.47184	-0.215105									497.467
	202.302	202.482	64.075	0.47766	-0.147385									497.468
	202.303	202.483	64.076	0.46632	-0.279334									497.468
	202.304	202.484	64.077	0.4821	-0.0957228									497.469
	202.305	202.485	64.078	0.44772	-0.495758									497.469
	202.306	202.486	64.079	0.52482	0.401354									497.47
	202.307	202.487	64.08	0.59946	1.26984									497.47
	202.308	202.488	64.081	0.6789	2.19418									497.471
		202.488	64.082	0.6462	1.81369									497.471
	202.309	202.489	64.083	0.6135	1.43321									497.472
	202.31	202.49	64.084	0.60864	1.37666									497.472
	202.311	202.491	64.085	0.59952	1.27054									497.473
	202.312	202.492	64.086	0.63948	1.7355									497.473
	202.313	202.493	64.087	0.58722	1.12742									497.473
	202.314	202.494	64.088	0.61206	1.41645									497.474
	202.315	202.495	64.089	0.63018	1.62729									497.474
	202.316	202.496	64.09	0.50958	0.224026									497.475
	202.317	202.497	64.091	0.59406	1.20701									497.475
	202.318	202.498	64.092	0.58386	1.08833									497.476
	202.319	202.499	64.093	0.54138	0.594041									497.476
	202.32	202.5	64.094	0.53922	0.568908									497.477
	202.321	202.501	64.095	0.54576	0.645006									497.477
	202.322	202.502	64.096	0.47022	-0.233955									497.478
	202.323	202.503	64.097	0.54762	0.666648									497.478
	202.324	202.504	64.098	0.51966	0.341314									497.478
	202.325	202.505	64.099	0.47394	-0.19067									497.479
	202.326	202.506	64.1	0.52446	0.397165									497.479
	202.327	202.507	64.101	0.48078	-0.111082									497.48
	202.328	202.508	64.102	0.54786	0.669441									497.48
	202.329	202.509	64.103	0.4866	-0.0433622									497.481
	202.33	202.51	64.104	0.4248	-0.762448									497.481
	202.332	202.512	64.105	0.5103	0.232404									497.482
	202.333	202.513	64.106	0.55704	0.776256									497.482
	202.334	202.514	64.107	0.5124	0.256839									497.483
	202.335	202.515	64.108	0.5328	0.494207									497.483
[truncated: 29,502 more rows]

## Sheet: Filters (time) 1 kyr
	Time Scale (ATS WaverideR)	Ti (Z-score)		405 kyr filter (350-450)	173 kyr filter (150-193)	100 kyr filter (85-140)	31 kyr filter (27-40)	20 kyr filter (15-21)		173 +31 kyr	405+100 kyr	405+100+20 kyr		Filtering of the Milankovitch cycles based on the WaverideR (WR) Age model
Data from Zhao et al (2022)	497.083	1.575		-0.0622717	-0.0323955	-0.122245	0.0136237	0.46146		-0.0187717	-0.184516	0.276943
	497.084	0.864		-0.0608658	-0.0303203	-0.120318	-0.011167	0.42135		-0.0414874	-0.181184	0.240166
	497.085	0.384		-0.0594476	-0.0282377	-0.118044	-0.0379144	0.31768		-0.0661521	-0.177492	0.140188
	497.086	0.62		-0.0580174	-0.0261504	-0.115424	-0.0655766	0.16165		-0.091727	-0.173442	-0.0117912
	497.087	0.733		-0.0565756	-0.0240614	-0.112462	-0.0930312	-0.0276744		-0.117093	-0.169038	-0.196712
	497.088	0.103		-0.0551225	-0.0219736	-0.109164	-0.11912	-0.225749		-0.141093	-0.164286	-0.390035
	497.089	-0.594		-0.0536583	-0.01989	-0.105535	-0.142695	-0.405811		-0.162585	-0.159194	-0.565005
	497.09	-0.306		-0.0521836	-0.0178134	-0.101585	-0.16267	-0.542592		-0.180483	-0.153769	-0.69636
	497.091	-2.033		-0.0506984	-0.015747	-0.0973221	-0.178066	-0.615941		-0.193813	-0.148021	-0.763961
	497.092	-1.063		-0.0492033	-0.0136935	-0.0927577	-0.188056	-0.61383		-0.201749	-0.141961	-0.755791
	497.093	-2.104		-0.0476985	-0.0116559	-0.0879041	-0.192006	-0.534282		-0.203662	-0.135603	-0.669884
	497.094	-1.633		-0.0461844	-0.00963716	-0.0827749	-0.189511	-0.385915		-0.199148	-0.128959	-0.514874
	497.095	1.903		-0.0446614	-0.00764015	-0.0773851	-0.180412	-0.186989		-0.188052	-0.122046	-0.309035
	497.096	0.761		-0.0431297	-0.00566773	-0.0717508	-0.16482	0.0369364		-0.170487	-0.11488	-0.0779441
	497.097	0.554		-0.0415897	-0.00372277	-0.0658895	-0.143114	0.256416		-0.146837	-0.107479	0.148937
	497.098	1.033		-0.0400419	-0.00180808	-0.0598198	-0.115942	0.442136		-0.117751	-0.0998617	0.342275
	497.099	1.321		-0.0384865	7.36e-05	-0.0535614	-0.0841967	0.568958		-0.0841231	-0.0920479	0.47691
	497.1	-0.556		-0.0369239	0.00191943	-0.0471351	-0.0489901	0.619409		-0.0470707	-0.084059	0.53535
	497.101	0.332		-0.0353545	0.00372682	-0.0405625	-0.0116174	0.586131		-0.00789054	-0.075917	0.510214
	497.102	0.869		-0.0337787	0.00549307	-0.0338661	0.0264914	0.472922		0.0319844	-0.0676448	0.405277
	497.103	0.103		-0.0321968	0.0072156	-0.0270694	0.063824	0.294231		0.0710396	-0.0592661	0.234965
	497.104	0.525		-0.0306091	0.00889188	-0.0201963	0.0988448	0.0731889		0.107737	-0.0508054	0.0223834
	497.105	-0.222		-0.0290162	0.0105194	-0.0132716	0.130056	-0.16155		0.140575	-0.0422877	-0.203837
	497.106	1.272		-0.0274183	0.0120958	-0.00632029	0.156058	-0.379686		0.168154	-0.0337386	-0.413425
	497.107	-0.439		-0.0258159	0.0136187	0.000631932	0.175611	-0.553337		0.18923	-0.0251839	-0.578521
	497.108	-0.925		-0.0242092	0.0150859	0.00755925	0.187689	-0.660704		0.202775	-0.01665	-0.677354
	497.109	-1.644		-0.0225988	0.0164951	0.0144356	0.191528	-0.688848		0.208023	-0.00816319	-0.697011
	497.11	-1.47		-0.020985	0.0178443	0.0212349	0.186666	-0.635221		0.20451	0.00024993	-0.634971
	497.111	-0.787		-0.0193682	0.0191314	0.0279311	0.17297	-0.507765		0.192101	0.0085629	-0.499203
	497.112	0.535		-0.0177488	0.0203544	0.0344982	0.150653	-0.323625		0.171007	0.0167494	-0.306876
	497.113	1.54		-0.0161271	0.0215116	0.0409104	0.120279	-0.106678		0.141791	0.0247833	-0.0818949
	497.114	0.359		-0.0145037	0.0226011	0.0471426	0.0827495	0.115722		0.105351	0.032639	0.148361
	497.115	1.235		-0.0128788	0.0236212	0.05317	0.0392801	0.316329		0.0629014	0.0402911	0.35662
	497.116	0.266		-0.0112529	0.0245705	0.0589682	-0.00863717	0.471428		0.0159334	0.0477152	0.519143
	497.117	1.771		-0.00962642	0.0254475	0.0645137	-0.0592838	0.563645		-0.0338363	0.0548873	0.618533
	497.118	1.157		-0.00799971	0.0262507	0.069784	-0.110775	0.583826		-0.0845245	0.0617843	0.645611
	497.119	0.771		-0.00637321	0.0269789	0.0747572	-0.161129	0.531779		-0.13415	0.068384	0.600163
	497.12	1.356		-0.00474731	0.027631	0.0794125	-0.208342	0.41587		-0.180711	0.0746652	0.490536
	497.121	-1.456		-0.00312242	0.0282058	0.0837304	-0.250464	0.251601		-0.222259	0.0806079	0.332209
	497.122	-0.468		-0.00149897	0.0287026	0.0876923	-0.285682	0.0594046		-0.25698	0.0861933	0.145598
	497.123	-0.833		0.000122653	0.0291204	0.0912812	-0.31239	-0.137988		-0.28327	0.0914038	-0.0465841
	497.124	-0.116		0.00174202	0.0294585	0.0944813	-0.329263	-0.318277		-0.299805	0.0962233	-0.222053
	497.125	-0.279		0.00335873	0.0297163	0.0972782	-0.335316	-0.462073		-0.305599	0.100637	-0.361436
	497.126	-0.387		0.00497236	0.0298934	0.0996593	-0.329953	-0.554873		-0.300059	0.104632	-0.450241
	497.127	0.081		0.00658249	0.0299894	0.101613	-0.313005	-0.588339		-0.283015	0.108196	-0.480144
	497.128	0.703		0.00818873	0.0300041	0.10313	-0.284748	-0.56083		-0.254744	0.111319	-0.449511
	497.129	0.832		0.00979063	0.0299372	0.104203	-0.245907	-0.477184		-0.21597	0.113993	-0.36319
	497.13	0.481		0.0113878	0.0297888	0.104825	-0.197643	-0.347859		-0.167854	0.116212	-0.231647
	497.131	0.898		0.0129798	0.029559	0.104991	-0.141519	-0.187595		-0.11196	0.117971	-0.0696244
	497.132	-0.465		0.0145663	0.029248	0.1047	-0.0794511	-0.0137478		-0.0502031	0.119266	0.105518
	497.133	-2.057		0.0161467	0.0288561	0.103949	-0.0136477	0.1555		0.0152084	0.120096	0.275596
	497.134	0.824		0.0177208	0.0283838	0.102741	0.0534715	0.302899		0.0818553	0.120462	0.423361
	497.135	0.613		0.019288	0.0278317	0.101078	0.119363	0.413722		0.147194	0.120366	0.534088
	497.136	4.44		0.020848	0.0272005	0.0989635	0.181454	0.477077		0.208654	0.119811	0.596889
	497.137	2.594		0.0224003	0.0264908	0.0964048	0.237246	0.486854		0.263737	0.118805	0.605659
	497.138	1.148		0.0239446	0.0257037	0.0934097	0.284413	0.442258		0.310117	0.117354	0.559612
	497.139	-1.072		0.0254804	0.0248402	0.0899876	0.320897	0.347884		0.345738	0.115468	0.463352
	497.14	0.993		0.0270072	0.0239013	0.08615	0.345002	0.213329		0.368903	0.113157	0.326486
	497.141	1.271		0.0285248	0.0228884	0.0819098	0.355466	0.0523488		0.378354	0.110435	0.162783
	497.142	-0.046		0.0300327	0.0218027	0.0772814	0.351527	-0.118401		0.37333	0.107314	-0.0110868
	497.143	1.136		0.0315304	0.0206457	0.0722809	0.332968	-0.28095		0.353614	0.103811	-0.177139
	497.144	1.386		0.0330175	0.019419	0.0669256	0.300139	-0.417812		0.319558	0.0999431	-0.317869
	497.145	-1.138		0.0344937	0.0181242	0.0612341	0.253962	-0.51383		0.272086	0.0957279	-0.418102
	497.146	0.728		0.0359586	0.016763	0.0552266	0.195906	-0.557889		0.212669	0.0911852	-0.466703
	497.147	0.028		0.0374116	0.0153372	0.0489241	0.127949	-0.544285		0.143286	0.0863357	-0.45795
	497.148	-0.359		0.0388525	0.0138489	0.0423488	0.0525074	-0.473583		0.0663563	0.0812013	-0.392382
	497.149	-1.166		0.0402808	0.0122999	0.035524	-0.0276446	-0.352796		-0.0153447	0.0758048	-0.276991
	497.15	0.083		0.0416961	0.0106924	0.0284736	-0.109481	-0.194829		-0.0987886	0.0701698	-0.124659
	497.151	-0.916		0.0430981	0.00902864	0.0212227	-0.189838	-0.0171947		-0.18081	0.0643207	0.047126
	497.152	-0.4		0.0444862	0.00731075	0.0137965	-0.265539	0.159899		-0.258229	0.0582828	0.218181
	497.153	0.062		0.0458602	0.00554111	0.0062214	-0.333524	0.315878		-0.327983	0.0520816	0.36796
	497.154	-1.215		0.0472196	0.0037221	-0.00147624	-0.390975	0.432284		-0.387253	0.0457433	0.478027
	497.155	0.962		0.048564	0.0018562	-0.00926948	-0.435441	0.495077		-0.433585	0.0392945	0.534372
	497.156	1.017		0.0498931	-5.41e-05	-0.0171312	-0.464945	0.496481		-0.464999	0.0327619	0.529242
	497.157	0.598		0.0512064	-0.00200614	-0.0250341	-0.478075	0.43607		-0.480082	0.0261723	0.462242
	497.158	0.815		0.0525036	-0.00399734	-0.032951	-0.474061	0.320958		-0.478058	0.0195526	0.34051
	497.159	-0.418		0.0537843	-0.006025	-0.0408547	-0.452813	0.165011		-0.458838	0.0129296	0.17794
	497.16	-0.958		0.0550481	-0.00808637	-0.0487182	-0.414947	-0.0128275		-0.423033	0.00632992	-0.00649755
	497.161	-1.598		0.0562946	-0.0101787	-0.0565147	-0.36177	-0.190896		-0.371949	-0.000220111	-0.191116
	497.162	-0.749		0.0575235	-0.0122991	-0.0642181	-0.29524	-0.347559		-0.307539	-0.00669459	-0.354254
	497.163	-1.487		0.0587344	-0.0144448	-0.0718025	-0.217895	-0.463967		-0.23234	-0.0130681	-0.477035
	497.164	-1.612		0.0599269	-0.0166129	-0.0792427	-0.132761	-0.526457		-0.149374	-0.0193158	-0.545773
	497.165	-1.4		0.0611006	-0.0188004	-0.0865142	-0.0432265	-0.52828		-0.0620269	-0.0254135	-0.553693
	497.166	-1.023		0.0622553	-0.0210045	-0.0935932	0.0470912	-0.470395		0.0260867	-0.0313379	-0.501733
	497.167	-0.624		0.0633905	-0.0232222	-0.100457	0.134499	-0.36126		0.111276	-0.0370663	-0.398326
	497.168	-0.763		0.0645059	-0.0254506	-0.107083	0.215383	-0.215615		0.189932	-0.0425771	-0.258192
	497.169	1.431		0.0656011	-0.0276866	-0.113451	0.28637	-0.0524644		0.258683	-0.0478497	-0.100314
	497.17	0.737		0.0666758	-0.0299273	-0.11954	0.344472	0.107472		0.314544	-0.0528644	0.0546079
	497.171	-0.293		0.0677296	-0.0321698	-0.125332	0.387225	0.244486		0.355055	-0.0576027	0.186884
	497.172	1.135		0.0687623	-0.0344111	-0.13081	0.412801	0.342402		0.37839	-0.0620472	0.280355
	497.173	1.24		0.0697734	-0.0366482	-0.135955	0.420098	0.390567		0.383449	-0.0661819	0.324385
	497.174	1.528		0.0707627	-0.0388782	-0.140755	0.408794	0.385042		0.369916	-0.0699919	0.31505
	497.175	0.915		0.0717298	-0.0410982	-0.145193	0.379372	0.328875		0.338274	-0.0734634	0.255411
	497.176	1.509		0.0726744	-0.0433052	-0.149259	0.333104	0.231429		0.289799	-0.0765843	0.154845
	497.177	0.617		0.0735962	-0.0454965	-0.15294	0.272004	0.106908		0.226507	-0.0793436	0.0275644
	497.178	-0.472		0.0744949	-0.0476691	-0.156226	0.198741	-0.0277066		0.151072	-0.0817316	-0.109438
	497.179	0.34		0.0753701	-0.0498203	-0.15911	0.116525	-0.154986		0.0667051	-0.0837401	-0.238726
	497.18	0.452		0.0762216	-0.0519473	-0.161584	0.0289684	-0.259342		-0.0229789	-0.0853624	-0.344705
	497.181	-0.034		0.077049	-0.0540474	-0.163642	-0.0600806	-0.328963		-0.114128	-0.0865928	-0.415556
	497.182	-0.855		0.0778521	-0.0561179	-0.165279	-0.146707	-0.357146		-0.202825	-0.0874272	-0.444573
	497.183	0.063		0.0786306	-0.0581562	-0.166494	-0.227111	-0.34289		-0.285267	-0.087863	-0.430753
	497.184	0.416		0.0793842	-0.0601597	-0.167283	-0.297777	-0.290702		-0.357937	-0.0878987	-0.378601
	497.185	0.295		0.0801126	-0.0621258	-0.167647	-0.355644	-0.209684		-0.417769	-0.0875343	-0.297218
	497.186	-0.351		0.0808156	-0.0640522	-0.167587	-0.39824	-0.112072		-0.462292	-0.086771	-0.198843
	497.187	-2.508		0.0814928	-0.0659364	-0.167104	-0.423802	-0.0114444		-0.489739	-0.0856113	-0.0970557
	497.188	-1.189		0.0821441	-0.0677762	-0.166203	-0.431358	0.0791315		-0.499134	-0.084059	-0.00492757
	497.189	-1.638		0.0827691	-0.0695692	-0.164888	-0.42077	0.148774		-0.490339	-0.0821193	0.0666547
	497.19	-2.414		0.0833676	-0.0713132	-0.163166	-0.39274	0.190059		-0.464053	-0.0797982	0.110261
	497.191	1.103		0.0839395	-0.0730063	-0.161043	-0.348779	0.199756		-0.421785	-0.0771032	0.122653
	497.192	0.397		0.0844843	-0.0746463	-0.158527	-0.29113	0.178955		-0.365777	-0.0740427	0.104912
	497.193	-1.579		0.085002	-0.0762313	-0.155628	-0.222663	0.132619		-0.298894	-0.0706264	0.0619926
	497.194	-0.205		0.0854922	-0.0777594	-0.152357	-0.146733	0.068652		-0.224492	-0.0668648	0.00178715
	497.195	-2.009		0.0859548	-0.0792288	-0.148725	-0.0670215	-0.00335249		-0.14625	-0.0627697	-0.0661221
	497.196	0.285		0.0863896	-0.0806379	-0.144743	0.0126417	-0.0734963		-0.0679962	-0.0583534	-0.13185
	497.197	0.526		0.0867963	-0.0819851	-0.140426	0.0884643	-0.132896		0.00647921	-0.0536295	-0.186525
	497.198	0.757		0.0871747	-0.0832688	-0.135787	0.156872	-0.174765		0.0736037	-0.0486122	-0.223377
	497.199	-0.208		0.0875247	-0.0844876	-0.130841	0.214683	-0.19513		0.130195	-0.0433168	-0.238446
	497.2	-0.27		0.087846	-0.0856401	-0.125605	0.259252	-0.193114		0.173612	-0.037759	-0.230873
	497.201	-0.168		0.0881385	-0.0867253	-0.120094	0.288606	-0.170782		0.201881	-0.0319556	-0.202738
	497.202	0.629		0.088402	-0.0877418	-0.114326	0.301526	-0.132604		0.213784	-0.0259237	-0.158528
	497.203	0.254		0.0886363	-0.0886887	-0.108318	0.297605	-0.0846478		0.208916	-0.0196812	-0.104329
	497.204	0.308		0.0888413	-0.0895651	-0.102088	0.277261	-0.0336329		0.187696	-0.0132468	-0.0468796
	497.205	0.586		0.0890169	-0.09037	-0.0956561	0.241712	0.0140025		0.151342	-0.00663924	0.00736326
	497.206	0.068		0.0891628	-0.0911028	-0.089041	0.192907	0.0528993		0.101804	0.000121788	0.0530211
	497.207	-0.421		0.0892789	-0.0917628	-0.0822625	0.133424	0.079334		0.0416614	0.00701638	0.0863504
	497.208	0.78		0.0893651	-0.0923494	-0.075341	0.0663418	0.0914843		-0.0260076	0.0140242	0.105508
	497.209	0.139		0.0894213	-0.0928622	-0.0682969	-0.00492064	0.0893979		-0.0977829	0.0211244	0.110522
	497.21	0.491		0.0894474	-0.0933009	-0.0611513	-0.0767721	0.0747103		-0.170073	0.028296	0.103006
	497.211	-0.076		0.0894432	-0.0936652	-0.0539254	-0.145629	0.0501882		-0.239294	0.0355178	0.085706
	497.212	-0.509		0.0894086	-0.093955	-0.0466406	-0.208092	0.0191991		-0.302047	0.042768	0.0619671
	497.213	-2.41		0.0893436	-0.0941702	-0.0393186	-0.261109	-0.0147964		-0.355279	0.050025	0.0352285
	497.214	-0.634		0.089248	-0.0943109	-0.0319813	-0.302126	-0.0486452		-0.396437	0.0572667	0.00862157
	497.215	0.47		0.0891218	-0.0943771	-0.0246505	-0.329203	-0.0797467		-0.42358	0.0644713	-0.0152754
	497.216	-1.036		0.0889649	-0.0943693	-0.0173484	-0.341107	-0.106131		-0.435476	0.0716165	-0.0345141
	497.217	-1.141		0.0887772	-0.0942876	-0.0100971	-0.33736	-0.126392		-0.431648	0.0786802	-0.0477115
	497.218	-1.155		0.0885587	-0.0941325	-0.00291852	-0.318258	-0.139541		-0.412391	0.0856402	-0.0539012
	497.219	0.867		0.0883094	-0.0939045	0.00416517	-0.284845	-0.144846		-0.378749	0.0924745	-0.052371
	497.22	-0.764		0.0880291	-0.0936043	0.011132	-0.238851	-0.141718		-0.332455	0.0991611	-0.0425569
	497.221	1.002		0.0877179	-0.0932326	0.0179603	-0.182603	-0.129724		-0.275835	0.105678	-0.0240461
	497.222	-0.415		0.0873756	-0.09279	0.0246283	-0.1189	-0.108708		-0.21169	0.112004	0.00329543
	497.223	0.628		0.0870024	-0.0922776	0.0311146	-0.0508727	-0.079027		-0.14315	0.118117	0.03909
	497.224	1.481		0.0865982	-0.0916963	0.037398	0.0181756	-0.0418281		-0.0735206	0.123996	0.0821682
	497.225	0.918		0.0861629	-0.091047	0.0434579	0.0849302	0.000704207		-0.00611678	0.129621	0.130325
	497.226	1.051		0.0856967	-0.090331	0.0492736	0.146226	0.0452345		0.0558949	0.13497	0.180205
	497.227	0.27		0.0851994	-0.0895494	0.0548252	0.199197	0.0873672		0.109648	0.140025	0.227392
	497.228	-0.258		0.0846712	-0.0887034	0.0600932	0.241412	0.121988		0.152708	0.144764	0.266753
	497.229	1.251		0.084112	-0.0877945	0.0650586	0.270979	0.143854		0.183184	0.149171	0.293024
	497.23	0.189		0.0835219	-0.0868241	0.069703	0.286631	0.148363		0.199807	0.153225	0.301588
	497.231	0.8475		0.082901	-0.0857935	0.0740087	0.287772	0.132407		0.201978	0.15691	0.289316
	497.232	-0.6415		0.0822492	-0.0847044	0.0779588	0.274495	0.0951381		0.18979	0.160208	0.255346
	497.233	0.024		0.0815667	-0.0835584	0.0815369	0.247559	0.0385143		0.164	0.163104	0.201618
	497.234	-0.1375		0.0808535	-0.0823571	0.0847278	0.208345	-0.0325355		0.125988	0.165581	0.133046
	497.235	0.45		0.0801097	-0.0811023	0.0875171	0.158774	-0.110402		0.077672	0.167627	0.0572244
	497.236	0.719		0.0793353	-0.0797957	0.0898914	0.101205	-0.185569		0.0214097	0.169227	-0.0163422
	497.237	0.663		0.0785306	-0.0784392	0.0918382	0.0383156	-0.247792		-0.0401236	0.170369	-0.0774237
	497.238	-0.0285		0.0776955	-0.0770346	0.0933464	-0.0270328	-0.287553		-0.104067	0.171042	-0.116511
	497.239	-1.2325		0.0768302	-0.0755838	0.0944059	-0.0919298	-0.297556		-0.167514	0.171236	-0.12632
	497.24	-2.9765		0.0759349	-0.0740889	0.095008	-0.153554	-0.274042		-0.227643	0.170943	-0.103099
	497.241	-4.534		0.0750095	-0.0725517	0.0951452	-0.209298	-0.217678		-0.28185	0.170155	-0.0475232
	497.242	0.007		0.0740544	-0.0709744	0.0948116	-0.256885	-0.133836		-0.32786	0.168866	0.0350303
	497.243	-0.4665		0.0730695	-0.069359	0.0940025	-0.294461	-0.0321683		-0.36382	0.167072	0.134904
	497.244	-0.443		0.0720551	-0.0677076	0.092715	-0.320664	0.0745093		-0.388372	0.16477	0.239279
	497.245	0.0105		0.0710114	-0.0660223	0.0909476	-0.334674	0.171906		-0.400696	0.161959	0.333865
	497.246	-0.865		0.0699384	-0.0643053	0.0887005	-0.336224	0.246277		-0.40053	0.158639	0.404916
	497.247	-0.007		0.0688365	-0.0625587	0.0859757	-0.325602	0.286479		-0.388161	0.154812	0.441291
	497.248	0.707		0.0677057	-0.0607848	0.0827769	-0.303608	0.285745		-0.364392	0.150483	0.436228
	497.249	1.0705		0.0665462	-0.0589856	0.0791093	-0.271502	0.242872		-0.330488	0.145656	0.388528
	497.25	-0.5095		0.0653583	-0.0571635	0.0749805	-0.230931	0.162618		-0.288095	0.140339	0.302957
	497.251	0.363		0.0641422	-0.0553207	0.0703995	-0.183837	0.055204		-0.239158	0.134542	0.189746
	497.252	0.0705		0.0628981	-0.0534592	0.0653773	-0.132357	-0.065031		-0.185817	0.128275	0.0632444
	497.253	0.0605		0.0616261	-0.0515815	0.059927	-0.0787252	-0.181639		-0.130307	0.121553	-0.0600855
	497.254	-0.6475		0.0603266	-0.0496897	0.0540632	-0.0251635	-0.278445		-0.0748532	0.11439	-0.164055
	497.255	-0.6135		0.0589999	-0.047786	0.0478029	0.0262094	-0.341941		-0.0215767	0.106803	-0.235138
	497.256	-0.1915		0.057646	-0.0458727	0.0411646	0.0734675	-0.363313		0.0275949	0.0988106	-0.264502
	497.257	-0.7015		0.0562653	-0.0439519	0.034169	0.11495	-0.339781		0.0709986	0.0904343	-0.249347
	497.258	1.898		0.0548582	-0.0420258	0.0268384	0.14932	-0.275037		0.107294	0.0816965	-0.19334
	497.259	0.1405		0.0534247	-0.0400966	0.0191971	0.1756	-0.178689		0.135503	0.0726218	-0.106067
	497.26	0.5155		0.0519653	-0.0381665	0.011271	0.193194	-0.064813		0.155028	0.0632363	-0.00157669
	497.261	1.0785		0.0504802	-0.0362377	0.00308803	0.201892	0.0501894		0.165655	0.0535682	0.103758
	497.262	0.741		0.0489697	-0.0343121	-0.00532256	0.20185	0.150073		0.167538	0.0436471	0.193721
	497.263	1.1355		0.0474341	-0.032392	-0.0139298	0.193561	0.22119		0.161169	0.0335043	0.254695
	497.264	1.2735		0.0458738	-0.0304794	-0.0227012	0.17781	0.254497		0.147331	0.0231725	0.27767
	497.265	1.2355		0.044289	-0.0285763	-0.0316031	0.155622	0.246823		0.127046	0.0126859	0.259509
	497.266	1.233		0.0426801	-0.0266847	-0.0406002	0.1282	0.201192		0.101515	0.00207988	0.203272
	497.267	-0.143		0.0410474	-0.0248066	-0.0496564	0.0968615	0.126179		0.0720549	-0.00860902	0.11757
	497.268	0.8125		0.0393912	-0.022944	-0.0587344	0.0629769	0.0343909		0.040033	-0.0193432	0.0150477
	497.269	0.833		0.037712	-0.0210987	-0.0677962	0.0279074	-0.0596426		0.00680869	-0.0300842	-0.0897268
	497.27	0.248		0.0360101	-0.0192726	-0.0768028	-0.00704857	-0.141829		-0.0263211	-0.0407928	-0.182622
	497.271	0.1065		0.0342858	-0.0174675	-0.085715	-0.0407013	-0.200731		-0.0581688	-0.0514292	-0.25216
	497.272	0.2065		0.0325395	-0.0156852	-0.0944928	-0.0720074	-0.229284		-0.0876926	-0.0619533	-0.291237
	497.273	0.3885		0.0307716	-0.0139274	-0.103096	-0.100096	-0.225731		-0.114024	-0.0723246	-0.298055
	497.274	-0.139		0.0289825	-0.0121958	-0.111485	-0.124286	-0.193651		-0.136482	-0.0825028	-0.276153
	497.275	0.5665		0.0271726	-0.010492	-0.11962	-0.144092	-0.141088		-0.154584	-0.0924475	-0.233535
	497.276	-0.6164		0.0253422	-0.00881772	-0.127461	-0.159218	-0.0789529		-0.168036	-0.102119	-0.181072
	497.277	0.618		0.0234918	-0.00717435	-0.134969	-0.169555	-0.0189912		-0.176729	-0.111477	-0.130468
	497.278	0.953		0.0216219	-0.00556343	-0.142106	-0.175152	0.0283309		-0.180716	-0.120484	-0.092153
	497.279	0.476		0.0197327	-0.00398638	-0.148834	-0.176205	0.0556434		-0.180192	-0.129101	-0.0734578
	497.28	0.48		0.0178248	-0.00244458	-0.155117	-0.173025	0.0598854		-0.17547	-0.137293	-0.0774071
	497.281	0.208		0.0158986	-0.000939366	-0.160921	-0.166015	0.0427076		-0.166955	-0.145022	-0.102315
	497.282	0.617		0.0139545	0.000528002	-0.166212	-0.155646	0.0100037		-0.155118	-0.152257	-0.142253
	497.283	-0.391		0.011993	0.00195631	-0.170958	-0.142429	-0.0293371		-0.140472	-0.158965	-0.188302
	497.284	0.2145		0.0100145	0.0033444	-0.175129	-0.126899	-0.0652251		-0.123555	-0.165115	-0.23034
	497.285	-0.3715		0.00801954	0.00469118	-0.178699	-0.109598	-0.0883868		-0.104907	-0.170679	-0.259066
	497.286	-0.023		0.00600851	0.0059956	-0.181641	-0.0910557	-0.0922357		-0.0850601	-0.175632	-0.267868
	497.287	0.263		0.0039819	0.00725668	-0.183933	-0.0717865	-0.0742541		-0.0645298	-0.179951	-0.254205
	497.288	0.709		0.0019402	0.0084735	-0.185555	-0.0522785	-0.0366278		-0.043805	-0.183615	-0.220242
	497.289	-2.0575		-0.000116114	0.00964519	-0.186489	-0.0329917	0.0139961		-0.0233465	-0.186605	-0.172609
	497.29	-2.057		-0.00218655	0.010771	-0.18672	-0.0143552	0.0676032		-0.00358425	-0.188907	-0.121304
	497.291	-1.1464		-0.00427062	0.01185	-0.186238	0.00323263	0.11258		0.0150827	-0.190509	-0.0779285
	497.292	0.482		-0.00636782	0.0128817	-0.185033	0.0194049	0.13786		0.0322867	-0.191401	-0.0535412
	497.293	0.483		-0.00847764	0.0138654	-0.183101	0.0338267	0.135072		0.0476921	-0.191579	-0.056507
	497.294	-0.024		-0.0105996	0.0148006	-0.180441	0.0461963	0.100313		0.0609969	-0.19104	-0.0907272
	497.295	0.4385		-0.0127331	0.0156866	-0.177052	0.0562483	0.035212		0.0719349	-0.189785	-0.154573
	497.296	0.343		-0.0148777	0.0165231	-0.172942	0.0637573	-0.052921		0.0802804	-0.187819	-0.24074
	497.297	-0.9185		-0.0170329	0.0173096	-0.168117	0.068544	-0.151936		0.0858537	-0.18515	-0.337086
	497.298	-1.573		-0.0191981	0.0180459	-0.162592	0.0704813	-0.246562		0.0885273	-0.18179	-0.428352
	497.299	-1.6255		-0.0213728	0.0187316	-0.15638	0.0695018	-0.320764		0.0882334	-0.177753	-0.498517
	497.3	-0.2785		-0.0235565	0.0193665	-0.149502	0.0656043	-0.360356		0.0849707	-0.173058	-0.533415
	497.301	-0.503		-0.0257485	0.0199504	-0.141979	0.0588605	-0.355466		0.0788109	-0.167728	-0.523194
	497.302	-1.282		-0.0279485	0.0204832	-0.133839	0.0494195	-0.302429		0.0699027	-0.161787	-0.464216
	497.303	-0.4915		-0.0301557	0.0209649	-0.125109	0.0375098	-0.204787		0.0584747	-0.155265	-0.360052
	497.304	0.452		-0.0323697	0.0213954	-0.115823	0.0234391	-0.0731961		0.0448345	-0.148193	-0.221389
	497.305	0.387		-0.03459	0.0217747	-0.106016	0.00758986	0.075789		0.0293646	-0.140606	-0.0648168
	497.306	0.7		-0.0368158	0.022103	-0.0957263	-0.00958764	0.221902		0.0125153	-0.132542	0.0893599
	497.307	1.649		-0.0390468	0.0223803	-0.0849957	-0.0275867	0.344021		-0.00520635	-0.124043	0.219979
	497.308	0.0675		-0.0412823	0.022607	-0.073868	-0.0458584	0.423278		-0.0232514	-0.11515	0.308128
	497.309	-0.2915		-0.0435217	0.0227831	-0.0623895	-0.0638288	0.44595		-0.0410457	-0.105911	0.340039
	497.31	0.6845		-0.0457645	0.022909	-0.0506088	-0.0809183	0.4057		-0.0580093	-0.0963733	0.309326
	497.311	0.503		-0.04801	0.022985	-0.0385766	-0.0965618	0.304801		-0.0735768	-0.0865866	0.218215
	497.312	0.498		-0.0502578	0.0230114	-0.0263453	-0.11023	0.154147		-0.0872185	-0.0766031	0.0775436
	497.313	-0.7065		-0.0525073	0.0229888	-0.0139689	-0.121449	-0.0280002		-0.0984603	-0.0664762	-0.0944764
	497.314	-0.874		-0.0547577	0.0229174	-0.00150266	-0.12982	-0.218345		-0.106902	-0.0562604	-0.274605
	497.315	-1.6205		-0.0570087	0.0227978	0.0109971	-0.135031	-0.391682		-0.112234	-0.0460116	-0.437693
	497.316	-0.889		-0.0592595	0.0226306	0.0234734	-0.136877	-0.524361		-0.114246	-0.0357861	-0.560147
	497.317	-0.824		-0.0615096	0.0224163	0.0358687	-0.135259	-0.597602		-0.112843	-0.025641	-0.623243
	497.318	0.241		-0.0637584	0.0221555	0.0481252	-0.130195	-0.600187		-0.10804	-0.0156332	-0.61582
	497.319	-0.15		-0.0660053	0.0218488	0.0601853	-0.121817	-0.53014		-0.0999685	-0.00581999	-0.53596
	497.32	-0.9165		-0.0682498	0.0214969	0.071992	-0.110366	-0.395149		-0.0888695	0.0037422	-0.391406
	497.321	1.142		-0.0704911	0.0211005	0.0834885	-0.0961847	-0.211654		-0.0750842	0.0129974	-0.198657
	497.322	0.277		-0.0727287	0.0206602	0.0946194	-0.0797026	-0.00272928		-0.0590424	0.0218906	0.0191613
	497.323	0.3825		-0.0749621	0.020177	0.10533	-0.0614243	0.204962		-0.0412473	0.0303682	0.23533
	497.324	1.4855		-0.0771906	0.0196514	0.115569	-0.0419103	0.384712		-0.0222589	0.038378	0.42309
	497.325	1.2795		-0.0794137	0.0190845	0.125283	-0.0217592	0.513333		-0.00267472	0.0458697	0.559203
	497.326	0.2765		-0.0816306	0.0184768	0.134426	-0.00158863	0.574245		0.0168882	0.052795	0.62704
	497.327	1.1885		-0.0838409	0.0178294	0.142949	0.0179829	0.559669		0.0358124	0.0591082	0.618777
	497.328	0.851		-0.0860439	0.0171431	0.15081	0.0363543	0.47163		0.0534974	0.064766	0.536396
	497.329	1.437		-0.088239	0.0164187	0.157967	0.0529575	0.321645		0.0693763	0.0697279	0.391373
	497.33	1.563		-0.0904257	0.0156572	0.164382	0.067273	0.129141		0.0829303	0.0739566	0.203097
	497.331	1.0995		-0.0926033	0.0148595	0.170021	0.0788421	-0.0811696		0.0937016	0.0774181	-0.00375154
	497.332	0.3985		-0.0947713	0.0140265	0.174853	0.0872777	-0.282575		0.101304	0.0800817	-0.202493
	497.333	-0.1995		-0.096929	0.0131592	0.178849	0.0922736	-0.449884		0.105433	0.0819204	-0.367964
	497.334	-0.758		-0.0990758	0.0122585	0.181987	0.0936115	-0.562686		0.10587	0.0829111	-0.479775
	497.335	-1.915		-0.101211	0.0113253	0.184246	0.0911663	-0.607916		0.102492	0.0830344	-0.524882
	497.336	-0.651		-0.103335	0.0103608	0.18561	0.0849105	-0.581413		0.0952712	0.0822753	-0.499138
	497.337	-0.3		-0.105445	0.00936577	0.186068	0.0749164	-0.488259		0.0842822	0.0806225	-0.407636
	497.338	-0.4555		-0.107543	0.0083413	0.185612	0.0613578	-0.341893		0.0696991	0.0780692	-0.263824
	497.339	0.413		-0.109626	0.00728837	0.184239	0.0445097	-0.162156		0.051798	0.0746128	-0.0875431
	497.34	-0.2085		-0.111696	0.00620797	0.181951	0.024746	0.0274651		0.030954	0.0702549	0.0977201
	497.341	0.3895		-0.11375	0.00510111	0.178751	0.00253667	0.202986		0.00763778	0.0650014	0.267987
	497.342	-0.4475		-0.115789	0.00396879	0.174651	-0.0215587	0.34304		-0.0175899	0.0588625	0.401903
	497.343	1.129		-0.117811	0.00281201	0.169664	-0.0468993	0.431555		-0.0440873	0.0518525	0.483408
	497.344	1.617		-0.119817	0.00163178	0.163807	-0.0727741	0.459625		-0.0711423	0.0439901	0.503615
	497.345	1.3365		-0.121806	0.000429091	0.157104	-0.0984168	0.426385		-0.0979877	0.0352978	0.461683
	497.346	0.0485		-0.123777	-0.000795046	0.149579	-0.123024	0.338789		-0.123819	0.0258022	0.364591
	497.347	-0.01		-0.125729	-0.00203964	0.141262	-0.145775	0.210369		-0.147814	0.0155335	0.225903
	497.348	-0.0185		-0.127662	-0.0033037	0.132188	-0.165858	0.0591922		-0.169162	0.00452599	0.0637182
	497.349	-0.5945		-0.129576	-0.00458623	0.122393	-0.182497	-0.0946957		-0.187083	-0.00718294	-0.101879
	497.35	-0.5085		-0.13147	-0.00588626	0.111917	-0.194979	-0.231953		-0.200865	-0.0195524	-0.251505
	497.351	0.165		-0.133343	-0.00720281	0.100804	-0.202685	-0.336404		-0.209888	-0.0325385	-0.368943
	497.352	0.5155		-0.135195	-0.00853492	0.0891003	-0.205121	-0.396957		-0.213656	-0.0460944	-0.443051
	497.353	-0.7315		-0.137025	-0.00988161	0.0768543	-0.201942	-0.408745		-0.211824	-0.0601705	-0.468916
	497.354	-0.147		-0.138833	-0.0112419	0.0641175	-0.192981	-0.373393		-0.204223	-0.0747151	-0.448108
	497.355	-0.567		-0.140618	-0.012615	0.0509436	-0.178265	-0.298408		-0.19088	-0.089674	-0.388082
	497.356	-0.942		-0.142379	-0.0139998	0.0373877	-0.158029	-0.195846		-0.172029	-0.104992	-0.300838
	497.357	-0.4475		-0.144117	-0.0153954	0.0235068	-0.132726	-0.0804551		-0.148121	-0.12061	-0.201065
	497.358	-0.581		-0.14583	-0.0168009	0.0093592	-0.103018	0.0324015		-0.119819	-0.136471	-0.10407
	497.359	0.2225		-0.147519	-0.0182154	-0.00499597	-0.0697691	0.128767		-0.0879845	-0.152515	-0.0237475
	497.36	-0.226		-0.149182	-0.019638	-0.0194987	-0.0340205	0.197788		-0.0536586	-0.168681	0.0291068
	497.361	0.14		-0.150819	-0.0210679	-0.0340888	0.00303859	0.232875		-0.0180293	-0.184908	0.0479668
	497.362	-0.963		-0.15243	-0.0225041	-0.0487055	0.0401115	0.232233		0.0176075	-0.201136	0.0310972
	497.363	-0.113		-0.154014	-0.0239457	-0.0632888	0.0758407	0.198718		0.051895	-0.217303	-0.018585
	497.364	0.649		-0.15557	-0.025392	-0.0777786	0.10886	0.139107		0.0834684	-0.233349	-0.0942417
	497.365	0.418		-0.157099	-0.026842	-0.092116	0.137853	0.0629241		0.111011	-0.249215	-0.186291
	497.366	-1.527		-0.158599	-0.0282949	-0.106243	0.161604	-0.0189951		0.133309	-0.264842	-0.283837
	497.367	-0.082		-0.160071	-0.0297498	-0.120102	0.179063	-0.0959735		0.149313	-0.280173	-0.376147
	497.368	0.296		-0.161513	-0.0312061	-0.133639	0.189386	-0.158818		0.15818	-0.295152	-0.45397
	497.369	0.0835		-0.162926	-0.0326628	-0.1468	0.191989	-0.200836		0.159326	-0.309726	-0.510562
	497.37	-0.099		-0.164308	-0.0341191	-0.159534	0.186574	-0.218445		0.152455	-0.323842	-0.542287
	497.371	-0.4525		-0.16566	-0.0355742	-0.171791	0.173159	-0.211336		0.137584	-0.33745	-0.548786
	497.372	-0.2		-0.166981	-0.0370274	-0.183524	0.15208	-0.182226		0.115053	-0.350505	-0.532731
	497.373	0.4585		-0.16827	-0.0384778	-0.19469	0.123996	-0.136263		0.0855181	-0.36296	-0.499223
	497.374	-1.043		-0.169527	-0.0399247	-0.205248	0.0898612	-0.0802032		0.0499365	-0.374776	-0.454979
	497.375	-1.027		-0.170753	-0.0413673	-0.215159	0.0508983	-0.0214828		0.00953097	-0.385912	-0.407395
	497.376	-0.7795		-0.171945	-0.0428048	-0.224388	0.00854981	0.0326958		-0.034255	-0.396333	-0.363637
	497.377	-1.351		-0.173105	-0.0442365	-0.232903	-0.0355777	0.0761588		-0.0798143	-0.406007	-0.329848
	497.378	-0.731		-0.174231	-0.0456616	-0.240675	-0.0797798	0.104363		-0.125441	-0.414905	-0.310542
	497.379	-0.2092		-0.175323	-0.0470794	-0.247678	-0.122325	0.114765		-0.169405	-0.423001	-0.308236
	497.38	-1.845		-0.176381	-0.048489	-0.253892	-0.16153	0.106948		-0.210019	-0.430273	-0.323325
	497.381	-1.4535		-0.177404	-0.0498897	-0.259298	-0.195831	0.0825211		-0.245721	-0.436702	-0.354181
	497.382	-2.227		-0.178393	-0.0512809	-0.26388	-0.223856	0.0448326		-0.275136	-0.442273	-0.39744
	497.383	-1.268		-0.179346	-0.0526616	-0.267628	-0.244481	-0.00146338		-0.297142	-0.446974	-0.448437
	497.384	-1.6912		-0.180264	-0.0540313	-0.270532	-0.256887	-0.0509298		-0.310918	-0.450796	-0.501726
	497.385	-2.5964		-0.181146	-0.0553891	-0.272589	-0.260594	-0.0979138		-0.315983	-0.453735	-0.551649
	497.386	-2.4472		-0.181991	-0.0567342	-0.273798	-0.255484	-0.13711		-0.312218	-0.455789	-0.5929
	497.387	-1.24775		-0.1828	-0.058066	-0.27416	-0.241811	-0.164082		-0.299877	-0.45696	-0.621043
	497.388	-0.589		-0.183573	-0.0593836	-0.273681	-0.220185	-0.175698		-0.279569	-0.457253	-0.632951
	497.389	-1.494		-0.184308	-0.0606863	-0.272368	-0.191553	-0.170455		-0.252239	-0.456676	-0.627131
	497.39	-1.8936		-0.185006	-0.0619733	-0.270234	-0.157153	-0.148664		-0.219126	-0.45524	-0.603904
	497.391	-0.9872		-0.185666	-0.0632439	-0.267292	-0.11846	-0.112458		-0.181704	-0.452958	-0.565415
	497.392	-0.8146		-0.186289	-0.0644973	-0.263559	-0.0771227	-0.0656271		-0.14162	-0.449847	-0.515474
	497.393	-0.63125		-0.186873	-0.0657326	-0.259054	-0.0348903	-0.0132801		-0.100623	-0.445927	-0.459207
	497.394	-2.5924		-0.187419	-0.0669492	-0.2538	0.00646667	0.0386644		-0.0604825	-0.441218	-0.402554
	497.395	-0.328		-0.187926	-0.0681461	-0.24782	0.0452328	0.0841003		-0.0229133	-0.435746	-0.351645
	497.396	-0.5492		-0.188394	-0.0693227	-0.24114	0.0798235	0.117423		0.0105008	-0.429534	-0.312111
	497.397	-0.7622		-0.188824	-0.070478	-0.233788	0.108854	0.134207		0.0383757	-0.422612	-0.288405
	497.398	0.0088		-0.189214	-0.0716113	-0.225794	0.131198	0.131791		0.0595865	-0.415008	-0.283217
	497.399	0.29425		-0.189565	-0.0727218	-0.21719	0.146037	0.109691		0.0733148	-0.406754	-0.297063
	497.4	-0.3658		-0.189876	-0.0738085	-0.208007	0.152891	0.0697735		0.0790825	-0.397883	-0.328109
	497.401	0.407		-0.190147	-0.0748708	-0.198279	0.15164	0.0161487		0.0767689	-0.388426	-0.372278
	497.402	0.1706		-0.190379	-0.0759076	-0.188041	0.14252	-0.0452231		0.0666122	-0.37842	-0.423643
	497.403	-0.7268		-0.190571	-0.0769182	-0.17733	0.126113	-0.107184		0.0491946	-0.3679	-0.475084
	497.404	-0.1335		-0.190722	-0.0779016	-0.16618	0.103314	-0.162217		0.025412	-0.356902	-0.519119
	497.405	-0.04325		-0.190833	-0.0788571	-0.15463	0.0752869	-0.203376		-0.00357017	-0.345463	-0.548839
	497.406	0.1036		-0.190904	-0.0797837	-0.142716	0.0434107	-0.225182		-0.0363729	-0.33362	-0.558802
	497.407	-0.269		-0.190934	-0.0806805	-0.130477	0.0092118	-0.224373		-0.0714687	-0.321411	-0.545784
	497.408	-0.246		-0.190924	-0.0815466	-0.117949	-0.0257054	-0.200393		-0.107252	-0.308873	-0.509266
	497.409	-0.0976		-0.190872	-0.0823812	-0.105171	-0.0597326	-0.155548		-0.142114	-0.296044	-0.451592
	497.41	-0.433		-0.190781	-0.0831832	-0.0921814	-0.0913302	-0.0947969		-0.174513	-0.282962	-0.377759
	497.411	-0.33375		-0.190648	-0.0839519	-0.0790167	-0.119097	-0.0251907		-0.203049	-0.269665	-0.294856
	497.412	1.5412		-0.190475	-0.0846862	-0.0657147	-0.141831	0.0449742		-0.226517	-0.256189	-0.211215
	497.413	1.056		-0.19026	-0.0853852	-0.0523125	-0.158582	0.107182		-0.243967	-0.242573	-0.135391
	497.414	0.9994		-0.190005	-0.0860481	-0.0388468	-0.168693	0.153767		-0.254741	-0.228852	-0.0750848
	497.415	1.1364		-0.189709	-0.0866738	-0.0253539	-0.171823	0.178897		-0.258497	-0.215063	-0.0361661
	497.416	0.752		-0.189372	-0.0872615	-0.0118697	-0.167962	0.179319		-0.255223	-0.201242	-0.0219228
	497.417	0.03425		-0.188994	-0.0878101	0.00157056	-0.157425	0.154791		-0.245235	-0.187424	-0.0326329
	497.418	-0.3768		-0.188576	-0.0883189	0.014932	-0.140833	0.108122		-0.229152	-0.173644	-0.0655212
	497.419	-0.283		-0.188116	-0.0887868	0.0281803	-0.119082	0.0448306		-0.207869	-0.159936	-0.115105
	497.42	0.3812		-0.187616	-0.0892129	0.0412817	-0.0932972	-0.0275492		-0.18251	-0.146334	-0.173883
	497.421	0.3696		-0.187075	-0.0895963	0.0542031	-0.0647786	-0.100403		-0.154375	-0.132872	-0.233275
	497.422	-0.1735		-0.186493	-0.0899361	0.0669118	-0.034938	-0.165106		-0.124874	-0.119581	-0.284687
	497.423	0.106		-0.185871	-0.0902315	0.0793757	-0.0052323	-0.214078		-0.0954638	-0.106495	-0.320573
	497.424	0.2082		-0.185208	-0.0904814	0.091563	0.0229046	-0.241696		-0.0675767	-0.0936452	-0.335341
	497.425	-0.69		-0.184505	-0.090685	0.103443	0.0481289	-0.244946		-0.0425561	-0.0810623	-0.326009
	497.426	0.1892		-0.183762	-0.0908415	0.114984	0.0692488	-0.223742		-0.0215927	-0.0687775	-0.29252
	497.427	-0.2502		-0.182978	-0.09095	0.126157	0.085279	-0.180876		-0.00567108	-0.0568208	-0.237697
	497.428	-0.8625		-0.182155	-0.0910097	0.136932	0.0954849	-0.121624		0.00447515	-0.0452223	-0.166846
	497.429	-0.515		-0.181291	-0.0910198	0.14728	0.0994157	-0.0530571		0.00839588	-0.0340114	-0.0870685
	497.43	-0.3062		-0.180388	-0.0909795	0.157172	0.096923	0.0168337		0.00594349	-0.023217	-0.00638328
	497.431	-0.698		-0.179446	-0.0908881	0.166578	0.0881657	0.0801016		-0.00272233	-0.0128677	0.0672339
	497.432	-0.7762		-0.178464	-0.0907447	0.175472	0.0736006	0.129762		-0.0171441	-0.00299164	0.126771
	497.433	-0.5642		-0.177443	-0.0905488	0.183826	0.0539587	0.160567		-0.0365901	0.00638338	0.16695
	497.434	-0.451		-0.176383	-0.0902996	0.191613	0.0302091	0.169541		-0.0600905	0.0152301	0.184771
	497.435	-0.5394		-0.175284	-0.0899965	0.198806	0.00351175	0.15624		-0.0864847	0.0235218	0.179762
	497.436	-0.8374		-0.174147	-0.0896389	0.205379	-0.0248386	0.122704		-0.114477	0.0312321	0.153936
	497.437	-1.567		-0.172972	-0.0892263	0.211307	-0.0534747	0.0731342		-0.142701	0.0383353	0.111469
	497.438	-0.8666		-0.171759	-0.0887582	0.216565	-0.0810223	0.0133453		-0.16978	0.0448062	0.0581515
	497.439	-1.574		-0.170507	-0.088234	0.221128	-0.106166	-0.0499344		-0.1944	0.0506204	0.000686058
	497.44	-1.5545		-0.169219	-0.0876534	0.224973	-0.12771	-0.109827		-0.215364	0.0557543	-0.0540727
	497.441	-1.8242		-0.167893	-0.087016	0.228078	-0.14464	-0.160045		-0.231656	0.0601849	-0.0998603
	497.442	-2.3506		-0.16653	-0.0863214	0.230421	-0.156164	-0.195532		-0.242485	0.0638903	-0.131642
	497.443	-1.191		-0.165131	-0.0855695	0.231981	-0.161757	-0.212939		-0.247326	0.0668497	-0.146089
	497.444	-2.0148		-0.163695	-0.08476	0.232739	-0.16118	-0.210903		-0.24594	0.0690434	-0.14186
	497.445	-1.972		-0.162224	-0.0838928	0.232677	-0.154496	-0.19011		-0.238388	0.0704529	-0.119657
	497.446	-1.9525		-0.160717	-0.0829677	0.231778	-0.142061	-0.153149		-0.225029	0.0710614	-0.0820873
	497.447	-1.296		-0.159174	-0.0819848	0.230028	-0.124514	-0.104184		-0.206499	0.0708534	-0.033331
	497.448	-1.3092		-0.157597	-0.0809441	0.227412	-0.102737	-0.0484964		-0.183681	0.0698153	0.0213189
	497.449	-2.174		-0.155985	-0.0798457	0.22392	-0.07782	0.00807493		-0.157666	0.0679353	0.0760102
	497.45	-0.7282		-0.154339	-0.0786898	0.219543	-0.0510036	0.0597134		-0.129693	0.0652037	0.124917
	497.451	-0.23275		-0.152659	-0.0774767	0.214272	-0.0236205	0.101193		-0.101097	0.0616131	0.162806
	497.452	-0.484		-0.150946	-0.0762067	0.208104	0.00296963	0.128374		-0.0732371	0.0571583	0.185532
	497.453	-0.2874		-0.149199	-0.0748803	0.201036	0.0274462	0.138593		-0.0474341	0.0518368	0.19043
	497.454	-0.9146		-0.14742	-0.0734978	0.193069	0.0485921	0.13091		-0.0249057	0.0456488	0.176558
	497.455	-0.218		-0.145609	-0.07206	0.184207	0.0653536	0.106192		-0.0067064	0.0385973	0.144789
	497.456	-0.9294		-0.143767	-0.0705674	0.174455	0.0768919	0.067036		0.00632449	0.0306884	0.0977243
	497.457	0.11425		-0.141893	-0.0690208	0.163824	0.082625	0.0175219		0.0136042	0.0219314	0.0394533
	497.458	-0.6085		-0.139988	-0.067421	0.152327	0.082257	-0.037181		0.014836	0.0123388	-0.0248422
	497.459	0.416		-0.138053	-0.0657689	0.139979	0.0757939	-0.0913194		0.010025	0.00192677	-0.0893926
	497.46	0.1666		-0.136088	-0.0640655	0.126802	0.0635446	-0.139134		-0.00052089	-0.00928516	-0.148419
	497.461	0.299		-0.134093	-0.062312	0.112819	0.0461077	-0.175457		-0.0162043	-0.0212737	-0.19673
	497.462	0.422		-0.13207	-0.0605094	0.0980579	0.0243434	-0.196269		-0.036166	-0.0340118	-0.230281
	497.463	0.9205		-0.130018	-0.0586591	0.0825492	-0.000666047	-0.199158		-0.0593251	-0.0474687	-0.246627
	497.464	0.7545		-0.127938	-0.0567623	0.0663286	-0.0276679	-0.183621		-0.0844302	-0.0616095	-0.245231
	497.465	0.5744		-0.125831	-0.0548207	0.0494352	-0.0552984	-0.151171		-0.110119	-0.0763958	-0.227567
	497.466	0.3938		-0.123697	-0.0528356	0.031912	-0.082148	-0.105229		-0.134984	-0.091785	-0.197014
	497.467	-0.215		-0.121537	-0.0508087	0.0138059	-0.106829	-0.0507899		-0.157638	-0.107731	-0.158521
	497.468	-0.2424		-0.11935	-0.0487417	-0.0048323	-0.128043	0.00610076		-0.176784	-0.124183	-0.118082
	497.469	-0.27175		-0.117139	-0.0466365	-0.023948	-0.144642	0.0590097		-0.191279	-0.141087	-0.0820772
	497.47	1.732		-0.114903	-0.0444949	-0.0434831	-0.15569	0.101853		-0.200185	-0.158386	-0.0565331
	497.471	1.5854		-0.112642	-0.0423188	-0.0633757	-0.160502	0.129612		-0.202821	-0.176018	-0.0464057
	497.472	1.2922		-0.110358	-0.0401105	-0.0835607	-0.158684	0.138953		-0.198795	-0.193919	-0.0549665
	497.473	1.127		-0.108052	-0.0378719	-0.10397	-0.150155	0.128649		-0.188027	-0.212021	-0.0833723
	497.474	1.3464		-0.105722	-0.0356054	-0.124531	-0.135149	0.0997732		-0.170755	-0.230253	-0.13048
	497.475	1.17725		-0.103371	-0.0333133	-0.14517	-0.114213	0.0556041		-0.147526	-0.248541	-0.192937
	497.476	0.584		-0.100999	-0.030998	-0.165811	-0.0881794	0.00126321		-0.119177	-0.26681	-0.265547
	497.477	0.1176		-0.0986057	-0.0286619	-0.186374	-0.0581332	-0.0568815		-0.086795	-0.28498	-0.341861
	497.478	0.4062		-0.0961926	-0.0263075	-0.206778	-0.0253639	-0.111976		-0.0516714	-0.302971	-0.414947
	497.479	0.397		-0.0937602	-0.0239377	-0.22694	0.00869181	-0.157513		-0.0152458	-0.320701	-0.478214
	497.48	0.5266		-0.0913089	-0.0215549	-0.246777	0.0425139	-0.188122		0.020959	-0.338086	-0.526208
	497.481	-0.5135		-0.0888395	-0.019162	-0.266203	0.0745666	-0.200235		0.0554047	-0.355042	-0.555277
	497.482	0.5684		-0.0863526	-0.0167617	-0.285132	0.103367	-0.192517		0.0866058	-0.371485	-0.564001
	497.483	0.4772		-0.0838488	-0.0143571	-0.303479	0.127553	-0.166027		0.113196	-0.387328	-0.553355
	497.484	0.8134		-0.0813288	-0.011951	-0.321159	0.14594	-0.124077		0.133989	-0.402488	-0.526565
	497.485	0.401		-0.0787932	-0.00954642	-0.338086	0.157578	-0.0718109		0.148031	-0.416879	-0.48869
	497.486	0.046		-0.0762426	-0.0071464	-0.354177	0.161792	-0.0155572		0.154646	-0.43042	-0.445977
	497.487	0.073		-0.0736778	-0.00475404	-0.369349	0.158214	0.0379581		0.15346	-0.443027	-0.405069
	497.488	-0.4648		-0.0710993	-0.00237247	-0.383523	0.146797	0.0824383		0.144424	-0.454623	-0.372185
	497.489	-0.7386		-0.0685079	-4.85e-06	-0.396621	0.127822	0.112777		0.127817	-0.465129	-0.352352
	497.49	-0.6944		-0.0659043	0.00234561	-0.408568	0.101882	0.125661		0.104228	-0.474472	-0.348811
	497.491	-0.438		-0.063289	0.00467569	-0.419292	0.0698638	0.119935		0.0745395	-0.482581	-0.362645
	497.492	-0.653		-0.0606628	0.00698214	-0.428725	0.0329058	0.0967012		0.039888	-0.489388	-0.392687
	497.493	-1.837		-0.0580264	0.0092617	-0.436804	-0.00764537	0.0591287		0.00161633	-0.49483	-0.435702
	497.494	-0.387		-0.0553805	0.0115111	-0.44347	-0.0502908	0.012024		-0.0387797	-0.49885	-0.486826
	497.495	-0.5734		-0.0527257	0.013727	-0.448668	-0.0934394	-0.0387939		-0.0797123	-0.501394	-0.540188
	497.496	-2.341		-0.0500628	0.0159062	-0.452351	-0.135472	-0.0872238		-0.119566	-0.502414	-0.589638
	497.497	-1.784		-0.0473923	0.0180454	-0.454474	-0.174804	-0.127627		-0.156759	-0.501867	-0.629493
	497.498	-1.882		-0.0447152	0.0201414	-0.455002	-0.209949	-0.155494		-0.189808	-0.499717	-0.65521
	497.499	-1.633		-0.0420319	0.0221907	-0.453902	-0.239574	-0.167958		-0.217383	-0.495934	-0.663892
	497.5	-1.8952		-0.0393434	0.0241904	-0.451152	-0.262547	-0.164093		-0.238357	-0.490495	-0.654588
	497.501	-1.9848		-0.0366501	0.0261371	-0.446733	-0.277983	-0.144966		-0.251846	-0.483384	-0.62835
	497.502	-1.97375		-0.0339529	0.0280276	-0.440637	-0.28527	-0.113453		-0.257242	-0.47459	-0.588043
	497.503	-1.647		-0.0312525	0.0298589	-0.432859	-0.28409	-0.0738278		-0.254231	-0.464112	-0.537939
	497.504	-2.039		-0.0285496	0.0316279	-0.423404	-0.274429	-0.0312008		-0.242801	-0.451954	-0.483155
	497.505	-0.5905		-0.0258449	0.0333316	-0.412285	-0.256571	0.00913515		-0.223239	-0.43813	-0.428995
	497.506	-0.9602		-0.0231391	0.0349669	-0.399521	-0.231083	0.0423669		-0.196116	-0.42266	-0.380293
	497.507	-0.5318		-0.0204329	0.036531	-0.385138	-0.198796	0.0647489		-0.162265	-0.405571	-0.340822
	497.508	-0.89925		-0.017727	0.038021	-0.369173	-0.160766	0.0740454		-0.122746	-0.3869	-0.312854
	497.509	-0.217		-0.0150222	0.0394342	-0.351666	-0.11824	0.0697745		-0.0788056	-0.366688	-0.296913
	497.51	-2.002		-0.0123192	0.0407679	-0.332667	-0.0726036	0.0532236		-0.0318357	-0.344986	-0.291763
	497.511	0.7256		-0.00961861	0.0420195	-0.312234	-0.0253391	0.0272356		0.0166804	-0.321853	-0.294617
	497.512	0.3404		-0.00692127	0.0431866	-0.290431	0.0220293	-0.00420661		0.0652159	-0.297352	-0.301559
	497.513	-1.6922		-0.00422785	0.0442667	-0.267328	0.0679851	-0.0365439		0.112252	-0.271556	-0.3081
	497.514	0.265		-0.00153906	0.0452575	-0.243004	0.111068	-0.0652787		0.156326	-0.244543	-0.309822
	497.515	1.199		0.00114438	0.0461569	-0.217542	0.149921	-0.0866016		0.196078	-0.216398	-0.302999
	497.516	0.655		0.00382176	0.0469627	-0.191033	0.183329	-0.0979211		0.230292	-0.187211	-0.285132
	497.517	0.3872		0.00649236	0.0476732	-0.163572	0.210258	-0.0982197		0.257931	-0.157079	-0.255299
	497.518	0.4946		0.00915548	0.0482863	-0.13526	0.22988	-0.0881841		0.278167	-0.126105	-0.214289
	497.519	0.6768		0.0118104	0.0488005	-0.106205	0.241601	-0.0700844		0.290401	-0.0943944	-0.164479
	497.52	-0.01325		0.0144564	0.0492142	-0.0765154	0.245068	-0.047415		0.294282	-0.062059	-0.109474
	497.521	0.739		0.0170928	0.049526	-0.0463069	0.240185	-0.0243418		0.289711	-0.0292141	-0.0535559
	497.522	-0.134		0.0197189	0.0497345	-0.0156972	0.227107	-0.00503652		0.276842	0.00402169	-0.00101484
	497.523	0.6322		0.022334	0.0498388	0.0151927	0.206237	0.00700606		0.256076	0.0375267	0.0445328
	497.524	1.1584		0.0249373	0.0498378	0.0462395	0.178209	0.00956079		0.228047	0.0711769	0.0807376
	497.525	0.8832		0.0275283	0.0497307	0.0773179	0.143869	0.00207741		0.1936	0.104846	0.106924
	497.526	1.3695		0.0301061	0.0495168	0.108301	0.104251	-0.0141741		0.153767	0.138407	0.124233
	497.527	1.4286		0.0326702	0.0491956	0.139062	0.060542	-0.0362542		0.109738	0.171733	0.135478
	497.528	0.954		0.0352197	0.0487669	0.169474	0.0140536	-0.0599906		0.0628205	0.204694	0.144703
	497.529	1.278		0.0377542	0.0482304	0.199409	-0.0338217	-0.0806448		0.0144087	0.237163	0.156518
	497.53	1.1938		0.0402727	0.0475861	0.228741	-0.0816486	-0.0937112		-0.0340625	0.269014	0.175303
	497.531	0.202		0.0427748	0.0468343	0.257347	-0.127991	-0.0957239		-0.0811568	0.300121	0.204398
	497.532	1.25725		0.0452596	0.0459751	0.285103	-0.171455	-0.0849375		-0.12548	0.330363	0.245425
	497.533	1.4502		0.0477266	0.0450093	0.311891	-0.210728	-0.0617606		-0.165719	0.359618	0.297857
	497.534	1.025		0.0501751	0.0439374	0.337595	-0.244622	-0.0288537		-0.200684	0.38777	0.358917
	497.535	0.1496		0.0526044	0.0427602	0.362103	-0.272106	0.00914639		-0.229346	0.414707	0.423854
	497.536	1.35		0.0550138	0.041479	0.385306	-0.292342	0.0462545		-0.250863	0.44032	0.486575
	497.537	0.3736		0.0574028	0.0400947	0.407103	-0.304709	0.0760371		-0.264615	0.464505	0.540543
	497.538	1.45275		0.0597707	0.0386089	0.427395	-0.308828	0.0926524		-0.270219	0.487165	0.579818
	497.539	1.1972		0.0621168	0.037023	0.446091	-0.30457	0.0918683		-0.267547	0.508208	0.600076
	497.54	1.657		0.0644405	0.0353388	0.463106	-0.292069	0.0718895		-0.25673	0.527547	0.599436
	497.541	0.5784		0.0667412	0.0335582	0.478362	-0.271715	0.033845		-0.238157	0.545103	0.578948
	497.542	0.9422		0.0690182	0.0316833	0.491786	-0.244148	-0.0181646		-0.212465	0.560804	0.54264
	497.543	0.5035		0.071271	0.0297162	0.503315	-0.210237	-0.0774967		-0.18052	0.574586	0.497089
	497.544	1.053		0.0734989	0.0276593	0.512893	-0.171052	-0.135832		-0.143393	0.586392	0.45056
	497.545	0.6166		0.0757014	0.0255153	0.520471	-0.127836	-0.18436		-0.102321	0.596172	0.411812
	497.546	1.271		0.0778778	0.0232867	0.526008	-0.0819596	-0.215125		-0.0586729	0.603886	0.388761
	497.547	0.959		0.0800276	0.0209765	0.529474	-0.0348794	-0.222302		-0.013903	0.609502	0.3872
	497.548	0.8844		0.0821501	0.0185876	0.530845	0.0119115	-0.203229		0.0304992	0.612995	0.409767
	497.549	0.8315		0.0842449	0.0161233	0.530107	0.0569336	-0.158993		0.0730569	0.614352	0.455359
	497.55	1.5795		0.0863113	0.0135867	0.527253	0.0987707	-0.0944703		0.112357	0.613564	0.519094
	497.551	1.5644		0.0883487	0.0109814	0.522287	0.136118	-0.0177835		0.147099	0.610636	0.592852
	497.552	1.282		0.0903567	0.00831079	0.515221	0.167827	0.0607612		0.176138	0.605578	0.666339
	497.553	1.862		0.0923346	0.00557867	0.506076	0.192946	0.130117		0.198524	0.59841	0.728528
	497.554	1.9446		0.094282	0.00278881	0.49488	0.210746	0.18011		0.213535	0.589162	0.769272
	497.555	1.9385		0.0961984	-5.49e-05	0.481671	0.220754	0.202978		0.220699	0.577869	0.780847
	497.556	2.105		0.0980831	-0.00294843	0.466495	0.222759	0.194602		0.219811	0.564578	0.75918
	497.557	1.8784		0.0999357	-0.00588766	0.449408	0.216822	0.155224		0.210934	0.549343	0.704567
	497.558	2.023		0.101756	-0.00886837	0.43047	0.203266	0.0895378		0.194398	0.532226	0.621764
	497.559	1.663		0.103543	-0.0118863	0.409753	0.182667	0.00611537		0.170781	0.513295	0.519411
	497.56	1.315		0.105296	-0.014937	0.387332	0.155825	-0.0837601		0.140888	0.492628	0.408868
	497.561	0.7145		0.107015	-0.0180161	0.363294	0.123735	-0.167683		0.105719	0.470309	0.302626
	497.562	0.7805		0.1087	-0.021119	0.337727	0.0875464	-0.233909		0.0664273	0.446427	0.212518
	497.563	0.4526		0.110349	-0.0242412	0.310731	0.0485197	-0.273068		0.0242785	0.42108	0.148013
	497.564	-0.792		0.111964	-0.0273781	0.282408	0.00798156	-0.279545		-0.0193965	0.394371	0.114826
	497.565	0.7248		0.113542	-0.030525	0.252866	-0.0327254	-0.252328		-0.0632503	0.366408	0.11408
	497.566	0.6322		0.115084	-0.0336771	0.22222	-0.0722889	-0.195171		-0.105966	0.337304	0.142132
	497.567	-0.5905		0.116589	-0.0368299	0.190586	-0.109472	-0.116078		-0.146302	0.307175	0.191098
	497.568	0.562		0.118057	-0.0399785	0.158088	-0.143156	-0.026144		-0.183134	0.276146	0.250002
	497.569	0.3758		0.119488	-0.0431182	0.124851	-0.17237	0.0620399		-0.215488	0.244339	0.306379
	497.57	0.791		0.120881	-0.0462443	0.0910023	-0.196327	0.136208		-0.242571	0.211883	0.348091
	497.571	0.0048		0.122235	-0.049352	0.0566739	-0.214438	0.186176		-0.26379	0.178909	0.365085
	497.572	-0.2678		0.123551	-0.0524366	0.0219981	-0.226329	0.205292		-0.278766	0.145549	0.350841
	497.573	-0.052		0.124827	-0.0554934	-0.0128911	-0.231842	0.191348		-0.287336	0.111936	0.303284
	497.574	0.0394		0.126065	-0.0585178	-0.0478588	-0.231036	0.146845		-0.289554	0.0782058	0.225051
	497.575	-0.2112		0.127262	-0.0615051	-0.0827702	-0.224171	0.078572		-0.285676	0.0444919	0.123064
	497.576	-0.244		0.12842	-0.0644509	-0.117491	-0.211694	-0.00344177		-0.276145	0.0109289	0.00748712
	497.577	-0.1394		0.129537	-0.0673505	-0.151886	-0.194216	-0.0874119		-0.261567	-0.0223498	-0.109762
	497.578	-0.847		0.130613	-0.0701996	-0.185825	-0.172482	-0.161519		-0.242682	-0.0552122	-0.216731
	497.579	-0.31		0.131648	-0.0729938	-0.219177	-0.147344	-0.215596		-0.220338	-0.0875285	-0.303125
	497.58	-0.9376		0.132642	-0.0757287	-0.251813	-0.119724	-0.24254		-0.195453	-0.119171	-0.361711
	497.581	-0.539		0.133595	-0.0784003	-0.28361	-0.0905848	-0.23925		-0.168985	-0.150015	-0.389265
	497.582	-0.53		0.134506	-0.0810045	-0.314446	-0.0608967	-0.206964		-0.141901	-0.17994	-0.386904
	497.583	-0.173		0.135375	-0.0835372	-0.344204	-0.0316051	-0.150972		-0.115142	-0.208829	-0.359801
	497.584	-0.27825		0.136201	-0.0859946	-0.37277	-0.00360332	-0.0797469		-0.0895979	-0.236569	-0.316316
	497.585	-0.3205		0.136985	-0.088373	-0.400038	0.0222931	-0.00366018		-0.0660799	-0.263053	-0.266713
	497.586	0.0178		0.137726	-0.0906686	-0.425904	0.0453678	0.0665408		-0.0453008	-0.288178	-0.221637
	497.587	-0.54		0.138424	-0.0928782	-0.450272	0.0650213	0.121252		-0.0278569	-0.311847	-0.190595
	497.588	0.128		0.13908	-0.0949982	-0.47305	0.0807838	0.153318		-0.0142144	-0.33397	-0.180652
	497.589	-0.1376		0.139691	-0.0970255	-0.494155	0.0923246	0.158945		-0.00470092	-0.354464	-0.195519
	497.59	-0.44175		0.14026	-0.0989571	-0.513509	0.0994562	0.138106		0.000499184	-0.37325	-0.235144
	497.591	-0.075		0.140784	-0.10079	-0.531042	0.102135	0.0944058		0.00134537	-0.390258	-0.295852
	497.592	0.0876		0.141265	-0.102522	-0.54669	0.100459	0.0344454		-0.00206262	-0.405425	-0.37098
	497.593	-0.1614		0.141702	-0.104149	-0.560398	0.0946574	-0.0331973		-0.00949187	-0.418696	-0.451893
	497.594	-0.332		0.142095	-0.105671	-0.572118	0.0850838	-0.0992128		-0.0205868	-0.430023	-0.529236
	497.595	-0.1614		0.142444	-0.107083	-0.58181	0.0722009	-0.154845		-0.0348825	-0.439366	-0.594211
	497.596	-0.19125		0.142748	-0.108386	-0.589442	0.0565641	-0.193035		-0.0518215	-0.446694	-0.639729
	497.597	-0.1325		0.143008	-0.109576	-0.594991	0.0388037	-0.209285		-0.0707719	-0.451983	-0.661268
	497.598	0.0008		0.143224	-0.110651	-0.598441	0.0196035	-0.202123		-0.0910479	-0.455217	-0.65734
	497.599	0.2938		0.143395	-0.111612	-0.599784	-0.00032066	-0.173155		-0.111932	-0.456389	-0.629545
	497.6	0.114		0.143522	-0.112455	-0.599023	-0.0202445	-0.126703		-0.1327	-0.455502	-0.582204
	497.601	0.2616		0.143604	-0.113181	-0.596166	-0.0394587	-0.069118		-0.15264	-0.452563	-0.521681
	497.602	0.23175		0.143641	-0.113788	-0.591232	-0.0572923	-0.00788108		-0.17108	-0.447591	-0.455472
	497.603	0.267		0.143634	-0.114275	-0.584245	-0.0731357	0.0493847		-0.187411	-0.440611	-0.391227
	497.604	-0.556		0.143582	-0.114643	-0.57524	-0.0864619	0.0958501		-0.201105	-0.431658	-0.335808
	497.605	0.6948		0.143485	-0.11489	-0.564258	-0.0968453	0.126255		-0.211736	-0.420773	-0.294517
	497.606	0.084		0.143344	-0.115017	-0.551348	-0.103978	0.137444		-0.218995	-0.408004	-0.27056
	497.607	0.561		0.143158	-0.115024	-0.536568	-0.107681	0.128612		-0.222705	-0.39341	-0.264798
	497.608	-0.89575		0.142928	-0.114911	-0.519981	-0.107915	0.101269		-0.222826	-0.377052	-0.275783
	497.609	0.209		0.142653	-0.114678	-0.501657	-0.104779	0.058949		-0.219457	-0.359003	-0.300054
	497.61	-0.812		0.142334	-0.114327	-0.481674	-0.0985107	0.00671615		-0.212838	-0.33934	-0.332624
	497.611	-0.2216		0.14197	-0.113858	-0.460116	-0.0894794	-0.049448		-0.203338	-0.318146	-0.367594
	497.612	-0.417		0.141563	-0.113272	-0.437073	-0.0781695	-0.103313		-0.191442	-0.29551	-0.398823
	497.613	-1.6796		0.141111	-0.112571	-0.412639	-0.0651637	-0.149047		-0.177735	-0.271528	-0.420575
	497.614	-0.17025		0.140615	-0.111756	-0.386915	-0.0511187	-0.181789		-0.162874	-0.2463	-0.428089
	497.615	-0.4536		0.140075	-0.110828	-0.360006	-0.036738	-0.198099		-0.147566	-0.219931	-0.418031
	497.616	-0.3746		0.139491	-0.10979	-0.332021	-0.0227409	-0.196267		-0.132531	-0.19253	-0.388797
	497.617	-0.3922		0.138864	-0.108643	-0.303075	-0.00983078	-0.17645		-0.118474	-0.164211	-0.340661
	497.618	-0.603		0.138193	-0.10739	-0.273282	0.00133791	-0.140653		-0.106052	-0.135089	-0.275742
	497.619	-0.6956		0.137479	-0.106033	-0.242763	0.0101906	-0.0925435		-0.095842	-0.105284	-0.197828
	497.62	-0.40875		0.136722	-0.104574	-0.21164	0.0162614	-0.0371151		-0.0883124	-0.0749186	-0.112034
	497.621	-0.1348		0.135921	-0.103016	-0.180037	0.0192173	0.0197751		-0.0837988	-0.0441152	-0.0243402
	497.622	-0.2092		0.135079	-0.101362	-0.148078	0.0188769	0.0719687		-0.0824854	-0.0129994	0.0589693
	497.623	-0.34		0.134193	-0.0996153	-0.11589	0.0152226	0.113628		-0.0843927	0.0183032	0.131931
	497.624	0.285		0.133266	-0.0977782	-0.0835995	0.00840477	0.139863		-0.0893734	0.0496662	0.189529
	497.625	0.165		0.132296	-0.0958543	-0.0513325	-0.0012615	0.147305		-0.0971158	0.0809636	0.228269
	497.626	-0.28025		0.131285	-0.0938468	-0.0192146	-0.0133084	0.134559		-0.107155	0.11207	0.246629
	497.627	0.3042		0.130232	-0.0917593	0.0126298	-0.0271352	0.10247		-0.118895	0.142862	0.245331
	497.628	0.0992		0.129138	-0.0895953	0.044078	-0.0420348	0.0541541		-0.13163	0.173216	0.22737
	497.629	0.0338		0.128003	-0.0873586	0.0750096	-0.0572268	-0.00523455		-0.144585	0.203012	0.197778
	497.63	-0.453		0.126827	-0.0850529	0.105307	-0.0718948	-0.0690067		-0.156948	0.232134	0.163127
	497.631	0.407		0.125611	-0.0826821	0.134856	-0.0852269	-0.129666		-0.167909	0.260466	0.1308
	497.632	-0.146		0.124355	-0.0802501	0.163545	-0.0964564	-0.179796		-0.176706	0.287899	0.108104
	497.633	0.5802		0.123059	-0.077761	0.191267	-0.104902	-0.212992		-0.182663	0.314326	0.101334
	497.634	-0.0588		0.121724	-0.075219	0.217922	-0.110005	-0.224736		-0.185224	0.339645	0.11491
	497.635	-0.1055		0.12035	-0.0726281	0.24341	-0.111358	-0.213061		-0.183986	0.36376	0.150699
	497.636	0.657		0.118937	-0.0699926	0.267641	-0.108733	-0.178927		-0.178726	0.386578	0.207651
	497.637	0.505		0.117486	-0.0673169	0.290529	-0.102096	-0.126211		-0.169413	0.408015	0.281804
	497.638	0.23925		0.115997	-0.0646051	0.311993	-0.0916113	-0.0613009		-0.156216	0.42799	0.366689
	497.639	0.3154		0.11447	-0.0618616	0.33196	-0.0776413	0.00767009		-0.139503	0.44643	0.454101
	497.64	-0.333		0.112907	-0.0590909	0.350363	-0.060732	0.07187		-0.119823	0.46327	0.53514
	497.641	0.40275		0.111307	-0.0562972	0.367142	-0.0415898	0.122948		-0.097887	0.478448	0.601396
	497.642	2.099		0.10967	-0.053485	0.382243	-0.0210508	0.154183		-0.0745358	0.491913	0.646097
	497.643	2.425		0.107998	-0.0506586	0.395623	-4.21e-05	0.161444		-0.0507007	0.50362	0.665064
	497.644	1.6245		0.10629	-0.0478224	0.407241	0.0204619	0.143794		-0.0273605	0.513531	0.657325
	497.645	1.6424		0.104547	-0.0449808	0.417069	0.039486	0.10366		-0.00549481	0.521616	0.625277
	497.646	1.857		0.10277	-0.0421381	0.425084	0.0561021	0.0465216		0.0139641	0.527853	0.574375
	497.647	1.63075		0.100958	-0.0392985	0.43127	0.0694753	-0.019846		0.0301767	0.532228	0.512382
	497.648	1.395		0.0991134	-0.0364664	0.43562	0.0789053	-0.0864603		0.0424388	0.534734	0.448273
	497.649	1		0.0972354	-0.033646	0.438137	0.0838633	-0.144403		0.0502173	0.535372	0.390969
	497.65	1.7806		0.0953248	-0.0308414	0.438827	0.0840195	-0.18608		0.0531781	0.534151	0.348071
	497.651	1.9326		0.0933822	-0.0280567	0.437707	0.0792619	-0.206281		0.0512052	0.531089	0.324807
	497.652	0.4916		0.091408	-0.025296	0.4348	0.0697046	-0.202883		0.0444086	0.526208	0.323326
	497.653	1.042		0.0894027	-0.0225632	0.430139	0.0556848	-0.177087		0.0331216	0.519541	0.342454
	497.654	1.41		0.0873669	-0.0198621	0.42376	0.0377496	-0.133171		0.0178875	0.511127	0.377956
	497.655	1.188		0.085301	-0.0171966	0.41571	0.0166319	-0.0777842		-0.00056477	0.501011	0.423227
	497.656	1.6388		0.0832058	-0.0145704	0.406039	-0.00678244	-0.0189129		-0.0213528	0.489245	0.470332
	497.657	1.6136		0.0810816	-0.011987	0.394808	-0.0314948	0.0353187		-0.0434818	0.475889	0.511208
	497.658	1.8978		0.0789291	-0.00945002	0.382079	-0.0564399	0.077829		-0.0658899	0.461008	0.538837
	497.659	1.665		0.0767487	-0.00696276	0.367923	-0.0805353	0.103554		-0.0874981	0.444671	0.548226
	497.66	1.1516		0.0745412	-0.00452851	0.352416	-0.102731	0.110077		-0.107259	0.426957	0.537034
	497.661	0.946		0.0723071	-0.00215042	0.335638	-0.122058	0.0978264		-0.124209	0.407945	0.505771
	497.662	1.327		0.0700469	0.000168456	0.317675	-0.137675	0.0698308		-0.137506	0.387722	0.457553
	497.663	-0.0854		0.0677612	0.00242523	0.298616	-0.148901	0.0310938		-0.146476	0.366377	0.397471
	497.664	0.0898		0.0654507	0.00461712	0.278555	-0.155256	-0.0122944		-0.150638	0.344006	0.331711
	497.665	0.32075		0.063116	0.00674149	0.257587	-0.156471	-0.0541493		-0.149729	0.320703	0.266554
	497.666	0.8538		0.0607576	0.00879583	0.235813	-0.152508	-0.0891217		-0.143713	0.29657	0.207448
	497.667	0.073		0.0583762	0.0107778	0.213333	-0.143558	-0.113417		-0.13278	0.271709	0.158292
	497.668	0.0046		0.0559724	0.0126851	0.19025	-0.130026	-0.125203		-0.117341	0.246223	0.12102
	497.669	0.507		0.0535468	0.0145158	0.166671	-0.112518	-0.124656		-0.0980026	0.220218	0.0955615
	497.67	0.653		0.0511001	0.0162678	0.142699	-0.0918094	-0.113681		-0.0755416	0.1938	0.0801181
	497.671	0.55375		0.0486329	0.0179394	0.118442	-0.068805	-0.0953646		-0.0508655	0.167075	0.0717102
	497.672	0.4344		0.0461459	0.019529	0.0940038	-0.0445016	-0.0732943		-0.0249726	0.14015	0.0668554
	497.673	-0.025		0.0436397	0.0210351	0.0694901	-0.0199403	-0.0508804		0.00109478	0.11313	0.0622495
	497.674	0.307		0.041115	0.0224564	0.0450046	0.00384014	-0.0307965		0.0262965	0.0861196	0.055323
	497.675	0.9426		0.0385724	0.0237916	0.0206493	0.0258493	-0.0146435		0.0496409	0.0592217	0.0445782
	497.676	-0.8895		0.0360125	0.0250398	-0.00347571	0.0451879	-0.00287599		0.0702277	0.0325368	0.0296608
	497.677	0.38475		0.0334362	0.0262001	-0.027273	0.0610857	0.00501533		0.0872858	0.0061632	0.0111785
	497.678	0.3034		0.030844	0.0272717	-0.0506481	0.0729329	0.0101285		0.100205	-0.0198041	-0.00967559
	497.679	-0.228		0.0282366	0.0282542	-0.0735099	0.0803035	0.0136791		0.108558	-0.0452733	-0.0315942
	497.68	-0.308		0.0256147	0.0291471	-0.0957711	0.0829699	0.0165472		0.112117	-0.0701564	-0.0536092
	497.681	-0.2096		0.022979	0.02995	-0.117349	0.0809082	0.0189492		0.110858	-0.0943695	-0.0754203
	497.682	0.0315		0.0203301	0.030663	-0.138164	0.0742943	0.0203116		0.104957	-0.117833	-0.0975218
	497.683	-0.45725		0.0176689	0.031286	-0.158142	0.0634912	0.0193775		0.0947772	-0.140473	-0.121096
	497.684	-0.1456		0.0149959	0.0318191	-0.177216	0.0490285	0.0145292		0.0808476	-0.16222	-0.147691
	497.685	-0.982		0.0123118	0.0322628	-0.195321	0.0315746	0.00425608		0.0638374	-0.183009	-0.178753
	497.686	-0.2036		0.0096174	0.0326174	-0.212399	0.0119046	-0.0123316		0.044522	-0.202782	-0.215113
	497.687	-0.0374		0.00691337	0.0328836	-0.228399	-0.00913665	-0.0350615		0.0237469	-0.221485	-0.256547
	497.688	-0.476		0.0042004	0.0330619	-0.243274	-0.0306723	-0.062437		0.00238964	-0.239073	-0.30151
	497.689	-0.288		0.0014792	0.0331534	-0.256983	-0.0518319	-0.0916312		-0.0186785	-0.255504	-0.347135
	497.69	-0.602		-0.0012495	0.0331589	-0.269494	-0.0717881	-0.118766		-0.0386292	-0.270743	-0.38951
	497.691	-0.855		-0.00398501	0.0330796	-0.280777	-0.0897899	-0.139452		-0.0567103	-0.284762	-0.424214
	497.692	-0.66		-0.00672662	0.0329167	-0.290811	-0.105191	-0.1495		-0.0722744	-0.297538	-0.447038
	497.693	-1.1614		-0.00947359	0.0326714	-0.299581	-0.117474	-0.145706		-0.0848021	-0.309055	-0.454761
	497.694	-0.3645		-0.0122252	0.0323453	-0.307078	-0.126264	-0.12654		-0.0939183	-0.319303	-0.445843
	497.695	-0.4505		-0.0149808	0.0319399	-0.313298	-0.131341	-0.0926344		-0.0994015	-0.328278	-0.420913
	497.696	-0.4412		-0.0177396	0.0314568	-0.318243	-0.132643	-0.0469461		-0.101186	-0.335983	-0.382929
	497.697	-0.085		-0.020501	0.0308978	-0.321924	-0.130256	0.00545509		-0.0993583	-0.342425	-0.33697
	497.698	-0.1264		-0.0232641	0.0302648	-0.324353	-0.124409	0.0579633		-0.0941441	-0.347617	-0.289654
	497.699	0.1216		-0.0260283	0.0295595	-0.325551	-0.115453	0.103313		-0.0858938	-0.351579	-0.248266
	497.7	-0.168		-0.0287928	0.0287842	-0.325543	-0.103844	0.134629		-0.0750603	-0.354336	-0.219707
	497.701	-0.042		-0.031557	0.0279408	-0.32436	-0.0901152	0.146493		-0.0621745	-0.355917	-0.209424
	497.702	0.2108		-0.0343201	0.0270315	-0.322035	-0.0748503	0.135854		-0.0478189	-0.356356	-0.220502
	497.703	0.593		-0.0370814	0.0260585	-0.31861	-0.0586587	0.10264		-0.0326002	-0.355691	-0.253052
	497.704	0.0534		-0.0398402	0.0250242	-0.314127	-0.0421467	0.0499472		-0.0171225	-0.353967	-0.30402
	497.705	0.3318		-0.0425958	0.0239309	-0.308634	-0.0258929	-0.0162235		-0.00196204	-0.35123	-0.367453
	497.706	0.276		-0.0453475	0.022781	-0.302183	-0.0104261	-0.0876804		0.0123549	-0.34753	-0.43521
	497.707	0.1008		-0.0480944	0.0215769	-0.294827	0.00379333	-0.155101		0.0253703	-0.342921	-0.498022
	497.708	0.0538		-0.0508361	0.0203212	-0.286624	0.0163873	-0.209301		0.0367085	-0.33746	-0.546761
	497.709	-1.662		-0.0535716	0.0190164	-0.277633	0.027069	-0.242529		0.0460854	-0.331205	-0.573734
	497.71	0.074		-0.0563004	0.017665	-0.267917	0.0356472	-0.249604		0.0533122	-0.324217	-0.573821
	497.711	-0.0176		-0.0590217	0.0162697	-0.257538	0.042025	-0.228715		0.0582947	-0.31656	-0.545275
	497.712	0.6855		-0.0617348	0.014833	-0.246562	0.0461945	-0.181782		0.0610275	-0.308297	-0.49008
	497.713	-0.0878		-0.064439	0.0133576	-0.235055	0.0482265	-0.114295		0.0615841	-0.299494	-0.413789
	497.714	0.6012		-0.0671336	0.0118462	-0.223082	0.048258	-0.0346493		0.0601042	-0.290216	-0.324865
	497.715	0.992		-0.0698179	0.0103014	-0.210711	0.0464764	0.0469226		0.0567777	-0.280529	-0.233607
	497.716	0.53		-0.0724913	0.00872574	-0.198008	0.0431022	0.119708		0.051828	-0.2705	-0.150791
	497.717	0.7195		-0.075153	0.00712202	-0.18504	0.0383721	0.173957		0.0454941	-0.260193	-0.0862354
	497.718	0.5415		-0.0778024	0.00549283	-0.17187	0.0325221	0.202219		0.0380149	-0.249672	-0.0474538
	497.719	0.1538		-0.0804387	0.00384082	-0.158564	0.0257723	0.20039		0.0296131	-0.239003	-0.0386124
	497.72	1.04		-0.0830613	0.00216859	-0.145184	0.0183151	0.168328		0.0204837	-0.228245	-0.0599172
	497.721	-0.242		-0.0856696	0.000478735	-0.131791	0.0103057	0.109929		0.0107845	-0.21746	-0.107531
	497.722	0.4074		-0.0882628	-0.00122616	-0.118443	0.00185736	0.0326705		0.000631201	-0.206706	-0.174035
	497.723	-0.11225		-0.0908403	-0.00294357	-0.105198	-0.00695982	-0.0533472		-0.00990339	-0.196038	-0.249386
	497.724	-0.475		-0.0934014	-0.00467097	-0.0921094	-0.0161152	-0.136722		-0.0207862	-0.185511	-0.322233
	497.725	0.9098		-0.0959455	-0.00640589	-0.0792285	-0.0256105	-0.206275		-0.0320164	-0.175174	-0.381449
	497.726	0.2624		-0.0984719	-0.00814591	-0.0666037	-0.0354686	-0.252562		-0.0436145	-0.165076	-0.417638
	497.727	-0.442		-0.10098	-0.00988862	-0.0542803	-0.0457198	-0.26919		-0.0556084	-0.15526	-0.424451
	497.728	-0.209		-0.103469	-0.0116317	-0.0423006	-0.0563861	-0.253727		-0.0680178	-0.14577	-0.399496
	497.729	0.09975		-0.105939	-0.0133728	-0.030703	-0.0674648	-0.208098		-0.0808376	-0.136642	-0.34474
	497.73	0.0385		-0.108388	-0.0151098	-0.0195231	-0.0789122	-0.138398		-0.094022	-0.127911	-0.266309
	497.731	0.2792		-0.110816	-0.0168404	-0.00879233	-0.090629	-0.0541178		-0.107469	-0.119609	-0.173726
	497.732	0.3338		-0.113223	-0.0185625	0.00146095	-0.102449	0.0331025		-0.121011	-0.111762	-0.0786598
	497.733	-0.733		-0.115608	-0.0202741	0.0112122	-0.114131	0.111054		-0.134405	-0.104396	0.00665807
	497.734	-0.2918		-0.11797	-0.0219731	0.0204406	-0.125356	0.168652		-0.147329	-0.0975297	0.0711222
	497.735	-0.059		-0.120309	-0.0236577	0.0291286	-0.135731	0.197517		-0.159389	-0.0911806	0.106336
	497.736	0.8225		-0.122624	-0.0253259	0.0372624	-0.144797	0.193217		-0.170123	-0.0853617	0.107855
	497.737	0.5602		-0.124915	-0.026976	0.0448318	-0.152044	0.155992		-0.17902	-0.0800829	0.0759086
	497.738	0.3142		-0.12718	-0.0286061	0.0518297	-0.156933	0.0908293		-0.185539	-0.0753504	0.0154789
	497.739	0.871		-0.12942	-0.0302148	0.0582524	-0.15892	0.00687726		-0.189135	-0.0711675	-0.0642903
	497.74	0.4894		-0.131634	-0.0318003	0.0640996	-0.157489	-0.0837679		-0.189289	-0.067534	-0.151302
	497.741	0.7905		-0.13382	-0.0333612	0.0693736	-0.152181	-0.167731		-0.185542	-0.0644469	-0.232178
	497.742	0.6018		-0.13598	-0.0348961	0.07408	-0.142632	-0.23227		-0.177528	-0.0619	-0.29417
	497.743	-0.0736		-0.138112	-0.0364036	0.0782269	-0.128605	-0.267168		-0.165008	-0.0598849	-0.327052
	497.744	-1.1922		-0.140215	-0.0378823	0.081825	-0.110017	-0.266315		-0.1479	-0.0583901	-0.324705
	497.745	-0.684		-0.14229	-0.0393312	0.0848874	-0.086971	-0.228759		-0.126302	-0.0574023	-0.286162
	497.746	-0.1066		-0.144335	-0.0407491	0.0874291	-0.0597695	-0.15903		-0.100519	-0.0569055	-0.215936
	497.747	0.24325		-0.14635	-0.0421349	0.0894675	-0.028929	-0.066669		-0.071064	-0.0568822	-0.123551
	497.748	-0.1536		-0.148334	-0.0434877	0.0910215	0.00481985	0.0350018		-0.0386679	-0.0573129	-0.0223112
	497.749	0.2968		-0.150288	-0.0448066	0.0921113	0.0405415	0.13072		-0.00426509	-0.0581767	0.0725429
	497.75	0.0838		-0.15221	-0.0460907	0.092759	0.0771155	0.205489		0.0310247	-0.0594514	0.146038
	497.751	0.955		-0.154101	-0.0473394	0.0929872	0.113268	0.24684		0.0659282	-0.0611135	0.185727
	497.752	-1.3034		-0.155959	-0.0485519	0.0928199	0.147612	0.246808		0.0990597	-0.0631388	0.18367
	497.753	-0.255		-0.157784	-0.0497276	0.0922814	0.1787	0.203324		0.128972	-0.0655024	0.137821
	497.754	0.0856		-0.159576	-0.0508661	0.0913967	0.20508	0.120783		0.154214	-0.068179	0.0526035
	497.755	0.3756		-0.161334	-0.0519669	0.0901909	0.225362	0.00967737		0.173395	-0.0711429	-0.0614655
	497.756	-0.0184		-0.163058	-0.0530297	0.0886894	0.238277	-0.114697		0.185247	-0.0743684	-0.189066
	497.757	-0.808		-0.164747	-0.054054	0.0869174	0.242749	-0.234312		0.188695	-0.0778298	-0.312142
	497.758	-0.864		-0.166402	-0.0550398	0.0848996	0.237952	-0.330961		0.182912	-0.081502	-0.412463
	497.759	-1.4085		-0.168021	-0.0559867	0.0826605	0.223366	-0.388962		0.167379	-0.0853601	-0.474322
	497.76	-0.5032		-0.169604	-0.0568947	0.0802239	0.198821	-0.397587		0.141927	-0.0893798	-0.486967
	497.761	-0.447		-0.171151	-0.0577638	0.0776128	0.164533	-0.352868		0.106769	-0.0935378	-0.446406
	497.762	-0.7284		-0.172661	-0.058594	0.0748495	0.121116	-0.258473		0.0625216	-0.0978116	-0.356285
	497.763	-0.423		-0.174135	-0.0593854	0.0719549	0.0695863	-0.125497		0.0102009	-0.10218	-0.227676
	497.764	-0.189		-0.175571	-0.060138	0.0689492	0.0113488	0.0288451		-0.0487891	-0.106621	-0.0777764
	497.765	-1.59925		-0.176969	-0.0608521	0.0658512	-0.0518402	0.183468		-0.112692	-0.111118	0.0723497
	497.766	-0.1788		-0.17833	-0.0615279	0.0626782	-0.117923	0.316314		-0.17945	-0.115652	0.200662
	497.767	-0.9214		-0.179652	-0.0621657	0.0594467	-0.184604	0.407494		-0.24677	-0.120205	0.287288
	497.768	-0.2665		-0.180936	-0.0627659	0.0561711	-0.249436	0.442218		-0.312202	-0.124765	0.317454
	497.769	-0.915		-0.18218	-0.0633288	0.052865	-0.309905	0.413095		-0.373234	-0.129315	0.283779
	497.77	-0.896		-0.183386	-0.0638549	0.0495402	-0.363532	0.321431		-0.427387	-0.133846	0.187586
	497.771	-1.22825		-0.184552	-0.0643447	0.046207	-0.407976	0.177339		-0.47232	-0.138345	0.0389945
	497.772	-0.8756		-0.185678	-0.0647985	0.0428745	-0.441131	-0.00141594		-0.505929	-0.142804	-0.14422
	497.773	-0.6828		-0.186764	-0.0652171	0.0395501	-0.461227	-0.191678		-0.526444	-0.147214	-0.338892
	497.774	-0.36825		-0.18781	-0.065601	0.0362399	-0.466915	-0.367977		-0.532516	-0.15157	-0.519547
	497.775	-2.973		-0.188816	-0.0659507	0.0329488	-0.457341	-0.506008		-0.523292	-0.155867	-0.661875
	497.776	-1.963		-0.18978	-0.066267	0.02968	-0.432201	-0.586017		-0.498468	-0.1601	-0.746117
	497.777	-0.93725		-0.190704	-0.0665504	0.0264358	-0.391779	-0.595621		-0.458329	-0.164268	-0.759889
	497.778	-1.1644		-0.191586	-0.0668018	0.0232172	-0.336958	-0.531654		-0.403759	-0.168369	-0.700022
	497.779	-1.8814		-0.192427	-0.0670217	0.0200241	-0.269213	-0.400774		-0.336234	-0.172403	-0.573177
	497.78	-0.7895		-0.193227	-0.067211	0.0168554	-0.190574	-0.218727		-0.257785	-0.176371	-0.395098
	497.781	1.447		-0.193984	-0.0673703	0.0137091	-0.103568	-0.0083524		-0.170938	-0.180275	-0.188627
	497.782	0.737		-0.1947	-0.0675005	0.0105825	-0.0111382	0.203392		-0.0786387	-0.184117	0.0192747
	497.783	1.038		-0.195374	-0.0676023	0.00747185	0.0834585	0.388999		0.0158562	-0.187902	0.201097
	497.784	1.659		-0.196005	-0.0676765	0.00437317	0.176767	0.524072		0.109091	-0.191632	0.33244
	497.785	1.552		-0.196594	-0.0677239	0.00128179	0.265266	0.590597		0.197543	-0.195312	0.395285
	497.786	1.782		-0.197141	-0.0677452	-0.00180729	0.345503	0.579357		0.277758	-0.198948	0.380409
	497.787	1.719		-0.197645	-0.0677413	-0.00489936	0.414233	0.491187		0.346492	-0.202544	0.288643
	497.788	1.37267		-0.198106	-0.0677131	-0.00799986	0.468555	0.336882		0.400842	-0.206106	0.130777
	497.789	0.917		-0.198525	-0.0676611	-0.0111143	0.506039	0.13579		0.438378	-0.209639	-0.0738491
	497.79	-0.422		-0.1989	-0.0675864	-0.0142481	0.524833	-0.0867299		0.457247	-0.213148	-0.299878
	497.791	0.623		-0.199233	-0.0674896	-0.0174067	0.523758	-0.302618		0.456269	-0.21664	-0.519258
	497.792	-0.456333		-0.199523	-0.0673716	-0.0205949	0.502374	-0.484769		0.435002	-0.220118	-0.704887
	497.793	1.008		-0.19977	-0.0672331	-0.0238177	0.461016	-0.610527		0.393783	-0.223587	-0.834115
	497.794	0.587667		-0.199973	-0.0670749	-0.0270792	0.400808	-0.664567		0.333733	-0.227053	-0.89162
	497.795	-0.18		-0.200134	-0.0668978	-0.0303833	0.323635	-0.640788		0.256737	-0.230517	-0.871305
	497.796	0.621333		-0.200252	-0.0667024	-0.0337331	0.232091	-0.542985		0.165388	-0.233985	-0.77697
	497.797	-0.21		-0.200326	-0.0664896	-0.0371311	0.129391	-0.384228		0.0629018	-0.237457	-0.621685
	497.798	0.299		-0.200358	-0.0662599	-0.0405793	0.0192631	-0.185047		-0.0469968	-0.240937	-0.425984
	497.799	0.528667		-0.200346	-0.0660142	-0.0440786	-0.094196	0.0293092		-0.16021	-0.244425	-0.215116
	497.8	-0.025		-0.200292	-0.0657531	-0.0476292	-0.206672	0.23218		-0.272426	-0.247921	-0.0157413
	497.801	0.081		-0.200194	-0.0654772	-0.0512307	-0.313807	0.398905		-0.379284	-0.251425	0.14748
	497.802	0.348		-0.200054	-0.0651872	-0.0548814	-0.411369	0.509913		-0.476556	-0.254935	0.254978
	497.803	-0.118667		-0.199871	-0.0648836	-0.058579	-0.495435	0.553076		-0.560319	-0.25845	0.294626
	497.804	0.329667		-0.199645	-0.0645672	-0.0623202	-0.562553	0.52505		-0.62712	-0.261965	0.263085
	497.805	-0.824		-0.199376	-0.0642384	-0.0661007	-0.609893	0.431451		-0.674132	-0.265477	0.165974
	497.806	-0.913667		-0.199065	-0.0638977	-0.0699154	-0.635381	0.285873		-0.699279	-0.268981	0.0168926
	497.807	-0.957		-0.198712	-0.0635457	-0.0737582	-0.637792	0.107906		-0.701338	-0.27247	-0.164564
	497.808	-1.1985		-0.198316	-0.063183	-0.0776222	-0.616822	-0.0795523		-0.680005	-0.275938	-0.35549
	497.809	-1.071		-0.197878	-0.0628099	-0.0814995	-0.573114	-0.253322		-0.635924	-0.279377	-0.5327
	497.81	-0.852		-0.197397	-0.0624269	-0.0853814	-0.508251	-0.392897		-0.570678	-0.282779	-0.675675
	497.811	-1.104		-0.196875	-0.0620343	-0.0892586	-0.424699	-0.482935		-0.486733	-0.286134	-0.769069
	497.812	-2.87067		-0.196312	-0.0616327	-0.0931207	-0.325722	-0.514994		-0.387355	-0.289433	-0.804427
	497.813	-3.73833		-0.195707	-0.0612224	-0.0969569	-0.215255	-0.488283		-0.276477	-0.292663	-0.780947
	497.814	-1.734		-0.19506	-0.0608037	-0.100755	-0.0977444	-0.409392		-0.158548	-0.295815	-0.705207
	497.815	-1.89		-0.194372	-0.0603768	-0.104504	0.0220319	-0.29106		-0.038345	-0.298877	-0.589937
	497.816	-0.476		-0.193644	-0.0599422	-0.108191	0.139166	-0.150209		0.0792243	-0.301834	-0.452043
	497.817	-0.6725		-0.192874	-0.0595	-0.111801	0.248831	-0.00550993		0.189331	-0.304676	-0.310186
	497.818	-1.199		-0.192064	-0.0590505	-0.115323	0.346484	0.125134		0.287433	-0.307387	-0.182253
	497.819	-1.01033		-0.191214	-0.0585939	-0.118741	0.428072	0.226869		0.369478	-0.309955	-0.083086
	497.82	1.56633		-0.190324	-0.0581304	-0.122041	0.490208	0.289621		0.432078	-0.312366	-0.0227447
	497.821	1.29367		-0.189394	-0.0576602	-0.12521	0.530328	0.309076		0.472667	-0.314605	-0.00552864
	497.822	1.36567		-0.188425	-0.0571833	-0.128233	0.546804	0.286814		0.489621	-0.316658	-0.0298434
	497.823	0.513		-0.187416	-0.0566999	-0.131094	0.539028	0.22963		0.482328	-0.318511	-0.0888806
	497.824	0.175		-0.186369	-0.0562101	-0.133781	0.507442	0.148184		0.451232	-0.32015	-0.171966
	497.825	0.297		-0.185283	-0.055714	-0.136277	0.453524	0.0552229		0.39781	-0.32156	-0.266337
	497.826	0.227		-0.184159	-0.0552117	-0.13857	0.379726	-0.0363505		0.324514	-0.322729	-0.359079
	497.827	0.038		-0.182996	-0.054703	-0.140645	0.289371	-0.115266		0.234668	-0.323641	-0.438908
	497.828	0.0106667		-0.181796	-0.0541882	-0.142489	0.186505	-0.173287		0.132317	-0.324285	-0.497572
	497.829	-0.261667		-0.180559	-0.0536671	-0.144088	0.0757161	-0.206039		0.022049	-0.324647	-0.530686
	497.83	-0.195		-0.179285	-0.0531398	-0.14543	-0.0380721	-0.213195		-0.0912119	-0.324715	-0.53791
	497.831	-0.171		-0.177974	-0.0526062	-0.146503	-0.149822	-0.198037		-0.202428	-0.324477	-0.522513
	497.832	-0.372		-0.176627	-0.0520663	-0.147295	-0.254611	-0.166512		-0.306677	-0.323922	-0.490434
	497.833	-0.24		-0.175244	-0.05152	-0.147796	-0.347858	-0.125983		-0.399378	-0.32304	-0.449023
	497.834	0.075		-0.173825	-0.0509672	-0.147996	-0.425533	-0.0838793		-0.4765	-0.321821	-0.405701
	497.835	-0.669333		-0.172372	-0.0504079	-0.147886	-0.484336	-0.0465019		-0.534744	-0.320257	-0.366759
	497.836	-1.591		-0.170883	-0.0498419	-0.147456	-0.521855	-0.0181398		-0.571697	-0.31834	-0.33648
	497.837	-0.817333		-0.169361	-0.0492692	-0.146701	-0.536668	-0.000637071		-0.585937	-0.316062	-0.316699
	497.838	-1.276		-0.167804	-0.0486897	-0.145613	-0.528407	0.00656354		-0.577097	-0.313418	-0.306854
	497.839	-1.087		-0.166214	-0.0481032	-0.144188	-0.497772	0.00594493		-0.545875	-0.310402	-0.304457
	497.84	-1.695		-0.164591	-0.0475096	-0.14242	-0.446488	0.00113003		-0.493998	-0.307012	-0.305882
	497.841	-0.748		-0.162936	-0.0469088	-0.140308	-0.377222	-0.00404666		-0.424131	-0.303243	-0.30729
	497.842	-0.438333		-0.161248	-0.0463007	-0.137848	-0.293446	-0.00642654		-0.339747	-0.299096	-0.305522
	497.843	-0.823		-0.159529	-0.0456851	-0.13504	-0.199273	-0.00420697		-0.244958	-0.294569	-0.298776
	497.844	-0.326333		-0.157778	-0.045062	-0.131885	-0.0992518	0.00270616		-0.144314	-0.289663	-0.286957
	497.845	2.552		-0.155997	-0.0444311	-0.128383	0.00184971	0.0127279		-0.0425814	-0.28438	-0.271652
	497.846	0.979		-0.154185	-0.0437924	-0.124539	0.0992745	0.0229861		0.055482	-0.278724	-0.255738
	497.847	0.864333		-0.152344	-0.0431458	-0.120356	0.188503	0.0299899		0.145358	-0.2727	-0.24271
	497.848	-0.138		-0.150473	-0.0424912	-0.115839	0.265469	0.0304357		0.222978	-0.266313	-0.235877
	497.849	0.762333		-0.148574	-0.0418283	-0.110996	0.326746	0.0219923		0.284918	-0.25957	-0.237578
	497.85	0.239		-0.146646	-0.0411572	-0.105835	0.36971	0.00390723		0.328552	-0.252481	-0.248574
	497.851	0.902667		-0.14469	-0.0404778	-0.100364	0.392649	-0.0226841		0.352171	-0.245055	-0.267739
	497.852	0.288333		-0.142707	-0.03979	-0.0945955	0.394844	-0.0548129		0.355054	-0.237303	-0.292116
	497.853	0.612667		-0.140698	-0.0390936	-0.0885403	0.376581	-0.0880922		0.337488	-0.229238	-0.31733
	497.854	0.476333		-0.138662	-0.0383887	-0.082212	0.339133	-0.117422		0.300744	-0.220874	-0.338296
	497.855	0.184		-0.136601	-0.0376752	-0.0756254	0.284675	-0.137863		0.246999	-0.212226	-0.350089
	497.856	0.61		-0.134514	-0.0369531	-0.0687962	0.21617	-0.14552		0.179217	-0.20331	-0.34883
	497.857	0.221		-0.132403	-0.0362224	-0.0617415	0.137214	-0.138282		0.100992	-0.194144	-0.332426
	497.858	-0.232		-0.130268	-0.035483	-0.0544795	0.0518436	-0.116274		0.0163606	-0.184747	-0.301021
	497.859	-0.685		-0.128109	-0.0347351	-0.0470298	-0.0356636	-0.0819414		-0.0703987	-0.175139	-0.25708
	497.86	-1.32333		-0.125927	-0.0339786	-0.0394127	-0.121006	-0.0397472		-0.154985	-0.16534	-0.205087
	497.861	-0.665667		-0.123723	-0.0332135	-0.03165	-0.20007	0.00448628		-0.233284	-0.155373	-0.150887
	497.862	-1.552		-0.121498	-0.0324401	-0.0237643	-0.269131	0.0444689		-0.301571	-0.145262	-0.100793
	497.863	-0.979		-0.119251	-0.0316583	-0.0157792	-0.325026	0.07443		-0.356684	-0.13503	-0.0606002
	497.864	-0.411		-0.116984	-0.0308683	-0.00771921	-0.365306	0.0900316		-0.396174	-0.124703	-0.0346712
	497.865	-0.694667		-0.114696	-0.0300702	0.000390269	-0.388342	0.0890577		-0.418412	-0.114306	-0.0252482
	497.866	-0.416		-0.112389	-0.0292642	0.00852311	-0.393388	0.0717615		-0.422653	-0.103866	-0.0321048
	497.867	-0.439		-0.110064	-0.0284505	0.0166525	-0.380605	0.0408163		-0.409055	-0.0934112	-0.0525949
	497.868	-0.0416667		-0.10772	-0.0276293	0.024751	-0.351029	0.000878688		-0.378658	-0.0829689	-0.0820902
	497.869	-0.121667		-0.105358	-0.0268008	0.0327906	-0.306507	-0.0421611		-0.333308	-0.0725678	-0.114729
	497.87	-0.431		-0.10298	-0.0259652	0.040743	-0.249585	-0.0821135		-0.275551	-0.062237	-0.14435
	497.871	-1.686		-0.100585	-0.025123	0.0485793	-0.183367	-0.113453		-0.20849	-0.0520058	-0.165459
	497.872	-0.299		-0.0981745	-0.0242744	0.0562707	-0.111344	-0.132151		-0.135618	-0.0419038	-0.174055
	497.873	0.051		-0.0957487	-0.0234196	0.063788	-0.037215	-0.136245		-0.0606346	-0.0319608	-0.168206
	497.874	-0.198		-0.0933085	-0.0225591	0.071102	0.0353054	-0.126055		0.0127462	-0.0222065	-0.148261
	497.875	-1.07167		-0.0908543	-0.0216934	0.0781836	0.102674	-0.104023		0.0809805	-0.0126706	-0.116694
	497.876	2.074		-0.0883868	-0.0208226	0.0850041	0.161691	-0.0742162		0.140869	-0.00338269	-0.0775989
	497.877	0.904667		-0.0859067	-0.0199474	0.0915349	0.209656	-0.0415825		0.189709	0.00562817	-0.0359544
	497.878	1.371		-0.0834146	-0.0190683	0.0977478	0.244487	-0.0111038		0.225419	0.0143332	0.00322941
	497.879	-0.0363333		-0.0809111	-0.0181855	0.103615	0.26481	0.0130148		0.246624	0.0227042	0.0357189
	497.88	1.088		-0.0783968	-0.0172998	0.10911	0.270012	0.0279762		0.252712	0.0307136	0.0586898
	497.881	0.521		-0.0758725	-0.0164117	0.114207	0.26025	0.0327454		0.243838	0.0383348	0.0710802
	497.882	0.769		-0.0733387	-0.0155216	0.118881	0.236419	0.0280759		0.220897	0.0455419	0.0736178
	497.883	0.503333		-0.0707961	-0.0146303	0.123106	0.200092	0.0162198		0.185462	0.0523103	0.0685301
	497.884	0.498333		-0.0682453	-0.0137384	0.126862	0.153416	0.000389882		0.139678	0.0586164	0.0590063
	497.885	0.46		-0.065687	-0.0128464	0.130125	0.0989899	-0.0159183		0.0861435	0.0644379	0.0485196
	497.886	0.00933333		-0.0631218	-0.0119552	0.132876	0.0397179	-0.0296119		0.0277628	0.069754	0.0401421
	497.887	-0.495		-0.0605503	-0.0110653	0.135096	-0.021344	-0.0385671		-0.0324092	0.0745455	0.0359784
	497.888	-0.792		-0.0579733	-0.0101774	0.136768	-0.0811478	-0.0419739		-0.0913253	0.0787947	0.0368208
	497.889	-0.615		-0.0553913	-0.00929248	0.137877	-0.136806	-0.0404032		-0.146099	0.0824857	0.0420825
	497.89	-0.294333		-0.0528051	-0.00841114	0.13841	-0.185732	-0.035593		-0.194143	0.0856046	0.0500116
	497.891	-0.064		-0.0502152	-0.0075342	0.138355	-0.225758	-0.030004		-0.233292	0.0881394	0.0581354
	497.892	0.123667		-0.0476223	-0.00666248	0.137702	-0.25523	-0.026238		-0.261893	0.0900801	0.0638421
	497.893	-0.542		-0.0450271	-0.00579682	0.136446	-0.273073	-0.0264369		-0.278869	0.091419	0.0649821
	497.894	0.551		-0.0424301	-0.00493808	0.134581	-0.278818	-0.0317814		-0.283756	0.0921505	0.0603691
	497.895	0.667667		-0.0398322	-0.00408712	0.132104	-0.272609	-0.042189		-0.276697	0.0922714	0.0500824
	497.896	0.543		-0.0372338	-0.00324484	0.129015	-0.255167	-0.0562697		-0.258412	0.0917809	0.0355112
	497.897	-0.14		-0.0346357	-0.00241215	0.125316	-0.22773	-0.0715501		-0.230142	0.0906805	0.0191304
	497.898	-0.163		-0.0320385	-0.00158998	0.121013	-0.19197	-0.0849242		-0.19356	0.0889744	0.00405011
	497.899	0.175333		-0.0294428	-0.000779278	0.116112	-0.149894	-0.0932457		-0.150673	0.086669	-0.00657661
	497.9	-0.660667		-0.0268493	1.9e-05	0.110623	-0.103723	-0.0939494		-0.103704	0.0837737	-0.0101757
	497.901	0.026		-0.0242587	0.000803906	0.104559	-0.0557781	-0.0855864		-0.0549741	0.0803	-0.00528641
	497.902	1.999		-0.0216715	0.00157443	0.0979337	-0.0083584	-0.0681693		-0.00678397	0.0762622	0.00809285
	497.903	2.09		-0.0190884	0.00232959	0.0907655	0.0363708	-0.0432618		0.0387004	0.0716771	0.0284152
	497.904	1.6455		-0.0165101	0.00306837	0.083074	0.0764769	-0.0137929		0.0795453	0.0665639	0.052771
	497.905	1.33		-0.0139372	0.00378977	0.0748818	0.110342	0.0163738		0.114131	0.0609446	0.0773183
	497.906	0.819		-0.0113703	0.00449277	0.0662136	0.136722	0.0430411		0.141214	0.0548433	0.0978844
	497.907	0.456		-0.00881002	0.00517633	0.0570967	0.154788	0.062345		0.159964	0.0482867	0.110632
	497.908	1.03367		-0.00625706	0.00583943	0.0475608	0.164139	0.0713712		0.169978	0.0413037	0.112675
	497.909	1.00967		-0.00371201	0.00648104	0.0376376	0.164794	0.0686149		0.171275	0.0339255	0.10254
	497.91	0.531		-0.0011755	0.00710011	0.027361	0.157161	0.0542096		0.164262	0.0261855	0.0803951
	497.911	0.823333		0.00135184	0.00769562	0.016767	0.141997	0.0298885		0.149692	0.0181189	0.0480074
	497.912	0.482		0.00386941	0.00826653	0.00589353	0.120336	-0.00130809		0.128603	0.00976294	0.00845485
	497.913	-0.203		0.00637658	0.00881179	-0.0052199	0.0934308	-0.0355213		0.102243	0.00115669	-0.0343646
	497.914	-0.265		0.00887275	0.0093304	-0.016532	0.0626678	-0.0686698		0.0719982	-0.00765924	-0.076329
	497.915	-1.04067		0.0113573	0.00982132	-0.028	0.0294963	-0.0970479		0.0393176	-0.0166427	-0.113691
	497.916	-0.842		0.0138296	0.0102835	-0.03958	-0.00464481	-0.117826		0.00563874	-0.0257504	-0.143576
	497.917	-0.526		0.0162891	0.0107161	-0.0512267	-0.0383915	-0.129372		-0.0276754	-0.0349376	-0.16431
	497.918	-0.220667		0.0187352	0.0111179	-0.0628941	-0.0705082	-0.131356		-0.0593903	-0.0441589	-0.175515
	497.919	-0.073		0.0211672	0.011488	-0.0745352	-0.0999292	-0.12463		-0.0884412	-0.0533679	-0.177998
	497.92	0.2015		0.0235847	0.0118255	-0.0861026	-0.125786	-0.110929		-0.113961	-0.0625179	-0.173447
	497.921	-0.176		0.0259869	0.0121294	-0.0975485	-0.147422	-0.0924619		-0.135293	-0.0715616	-0.164023
	497.922	0.281333		0.0283734	0.0123988	-0.108825	-0.164393	-0.0714763		-0.151994	-0.0804516	-0.151928
	497.923	0.08		0.0307435	0.0126327	-0.119884	-0.176455	-0.0498928		-0.163823	-0.0891405	-0.139033
	497.924	0.516333		0.0330967	0.0128302	-0.130678	-0.18355	-0.0290668		-0.170719	-0.0975813	-0.126648
	497.925	0.893		0.0354324	0.0129906	-0.14116	-0.185772	-0.00972295		-0.172782	-0.105727	-0.11545
	497.926	0.065		0.03775	0.0131129	-0.151283	-0.183347	0.00794099		-0.170235	-0.113533	-0.105592
	497.927	0.587333		0.040049	0.0131963	-0.161002	-0.176596	0.024017		-0.163399	-0.120953	-0.0969357
	497.928	0.532		0.0423289	0.01324	-0.170272	-0.165906	0.0385823		-0.152666	-0.127943	-0.089361
	497.929	0.0723333		0.044589	0.0132433	-0.179051	-0.151712	0.0514071		-0.138468	-0.134462	-0.0830548
	497.93	1.203		0.0468289	0.0132055	-0.187297	-0.134468	0.0617548		-0.121262	-0.140468	-0.0787129
	497.931	0.420333		0.0490479	0.0131258	-0.194969	-0.114642	0.0683328		-0.101516	-0.145921	-0.0775887
	497.932	0.654333		0.0512457	0.0130035	-0.202032	-0.0927039	0.069424		-0.0797003	-0.150786	-0.0813622
	497.933	0.38		0.0534215	0.0128382	-0.208448	-0.069127	0.0631874		-0.0562888	-0.155027	-0.0918392
	497.934	0.101667		0.0555751	0.0126291	-0.214185	-0.0443907	0.0480804		-0.0317616	-0.15861	-0.11053
	497.935	-0.519		0.0577057	0.0123757	-0.219213	-0.0189881	0.0233217		-0.00661247	-0.161507	-0.138186
	497.936	-0.3635		0.0598129	0.0120775	-0.223503	0.00656529	-0.010698		0.0186428	-0.16369	-0.174388
	497.937	-0.424		0.0618962	0.0117341	-0.22703	0.0317244	-0.0521533		0.0434585	-0.165134	-0.217287
	497.938	-1.23133		0.0639551	0.011345	-0.229772	0.0559088	-0.0977432		0.0672538	-0.165817	-0.26356
	497.939	-1.327		0.0659891	0.0109099	-0.231711	0.0785025	-0.14291		0.0894125	-0.165722	-0.308632
	497.94	-0.157667		0.0679978	0.0104285	-0.23283	0.0988589	-0.182312		0.109287	-0.164833	-0.347145
	497.941	-0.617		0.0699806	0.00990045	-0.233119	0.116313	-0.210502		0.126213	-0.163138	-0.37364
	497.942	-0.436		0.0719371	0.00932555	-0.232567	0.130199	-0.222707		0.139524	-0.160629	-0.383337
	497.943	-0.313		0.0738668	0.00870366	-0.231169	0.139878	-0.21561		0.148581	-0.157302	-0.372912
	497.944	-0.175		0.0757693	0.00803465	-0.228925	0.144766	-0.187983		0.152801	-0.153156	-0.341138
	497.945	-0.272		0.0776441	0.00731846	-0.225836	0.144373	-0.141083		0.151691	-0.148192	-0.289274
	497.946	-0.764		0.0794907	0.00655511	-0.221908	0.138331	-0.078711		0.144886	-0.142417	-0.221128
	497.947	0.249667		0.0813088	0.00574463	-0.21715	0.126439	-0.00691665		0.132184	-0.135841	-0.142758
	497.948	-0.472		0.083098	0.00488714	-0.211576	0.108687	0.0666411		0.113575	-0.128478	-0.0618365
	497.949	1.168		0.0848577	0.00398283	-0.205202	0.0852867	0.133592		0.0892696	-0.120344	0.0132477
	497.95	0.597667		0.0865875	0.00303193	-0.198048	0.0566828	0.185898		0.0597147	-0.111461	0.0744368
	497.951	0.905		0.0882872	0.00203473	-0.19014	0.0235631	0.216901		0.0255978	-0.101853	0.115048
	497.952	0.696		0.0899562	0.000991592	-0.181504	-0.0131498	0.222224		-0.0121582	-0.0915478	0.130676
	497.953	0.253		0.0915942	-9.71e-05	-0.172171	-0.0523177	0.200392		-0.0524148	-0.0805769	0.119815
	497.954	0.36		0.0932008	-0.00123072	-0.162176	-0.0926196	0.153099		-0.0938503	-0.0689747	0.0841242
	497.955	-0.275667		0.0947756	-0.00240886	-0.151555	-0.132596	0.085056		-0.135005	-0.056779	0.028277
	497.956	0.738667		0.0963183	-0.00363085	-0.140349	-0.170705	0.00346157		-0.174336	-0.0440304	-0.0405688
	497.957	0.0613333		0.0978285	-0.00489601	-0.128601	-0.205385	-0.0828504		-0.210281	-0.0307726	-0.113623
	497.958	-4.291		0.0993058	-0.00620359	-0.116358	-0.235123	-0.164464		-0.241327	-0.0170518	-0.181515
	497.959	0.136		0.10075	-0.00755278	-0.103667	-0.258529	-0.232496		-0.266082	-0.00291689	-0.235413
	497.96	-0.573		0.102161	-0.00894268	-0.0905794	-0.274399	-0.279634		-0.283342	0.0115812	-0.268053
	497.961	-0.874333		0.103537	-0.0103724	-0.0771481	-0.281786	-0.300957		-0.292158	0.0263891	-0.274568
	497.962	-2.275		0.10488	-0.0118408	-0.0634279	-0.280047	-0.294456		-0.291888	0.041452	-0.253004
	497.963	-0.879667		0.106188	-0.0133469	-0.0494749	-0.268893	-0.261187		-0.28224	0.056713	-0.204474
	497.964	-0.949667		0.107461	-0.0148895	-0.0353471	-0.248411	-0.205073		-0.2633	0.0721141	-0.132959
	497.965	-0.154		0.108699	-0.0164675	-0.0211034	-0.21908	-0.132373		-0.235547	0.087596	-0.0447769
	497.966	-0.045		0.109902	-0.0180795	-0.00680378	-0.181761	-0.0509203		-0.199841	0.103098	0.0521781
	497.967	-0.46		0.111069	-0.0197242	0.00749131	-0.137677	0.0307771		-0.157401	0.118561	0.149338
	497.968	0.301		0.112201	-0.0214002	0.0217209	-0.0883672	0.104465		-0.109767	0.133922	0.238387
	497.969	0.932		0.113296	-0.0231059	0.0358239	-0.035634	0.162989		-0.0587399	0.14912	0.312109
	497.97	0.332667		0.114354	-0.02484	0.0497395	0.0185289	0.200977		-0.00631114	0.164094	0.365071
	497.971	0.351333		0.115376	-0.0266008	0.0634071	0.0720156	0.215297		0.0454148	0.178784	0.394081
	497.972	1.839		0.116362	-0.0283866	0.0767669	0.122695	0.205269		0.0943088	0.193128	0.398397
	497.973	1.32767		0.11731	-0.0301958	0.08976	0.168502	0.172615		0.138306	0.20707	0.379685
	497.974	0.901		0.11822	-0.0320265	0.102329	0.20752	0.121195		0.175494	0.220549	0.341744
	497.975	0.8845		0.119093	-0.0338769	0.114417	0.238072	0.056548		0.204195	0.23351	0.290058
	497.976	0.733		0.119929	-0.0357453	0.125971	0.25879	-0.0146891		0.223044	0.245899	0.23121
	497.977	0.245		0.120726	-0.0376295	0.136937	0.268674	-0.0854412		0.231045	0.257663	0.172222
	497.978	0.529		0.121485	-0.0395277	0.147265	0.267148	-0.148869		0.22762	0.268751	0.119882
	497.979	0.605333		0.122206	-0.0414378	0.156908	0.254081	-0.199002		0.212643	0.279115	0.0801123
	497.98	0.601333		0.122889	-0.0433578	0.165821	0.229804	-0.23129		0.186446	0.28871	0.0574197
	497.981	0.788		0.123533	-0.0452855	0.17396	0.195102	-0.243013		0.149816	0.297493	0.0544805
	497.982	-0.0386667		0.124138	-0.0472187	0.181288	0.151187	-0.233534		0.103968	0.305427	0.0718928
	497.983	0.316		0.124705	-0.0491553	0.187768	0.099658	-0.204353		0.0505027	0.312473	0.10812
	497.984	-0.11		0.125232	-0.0510931	0.193368	0.0424386	-0.158956		-0.00865444	0.3186	0.159644
	497.985	-0.7		0.12572	-0.0530297	0.198058	-0.0182935	-0.102466		-0.0713232	0.323779	0.221312
	497.986	-0.351667		0.12617	-0.0549628	0.201815	-0.0801906	-0.0411062		-0.135153	0.327984	0.286878
	497.987	-0.417667		0.126579	-0.0568902	0.204615	-0.140825	0.0184642		-0.197715	0.331195	0.349659
	497.988	-0.293333		0.12695	-0.0588094	0.206443	-0.197786	0.0698845		-0.256595	0.333393	0.403277
	497.989	0.283667		0.127281	-0.0607181	0.207285	-0.248771	0.107818		-0.309489	0.334565	0.442384
	497.99	0.05		0.127572	-0.0626139	0.207131	-0.291683	0.12858		-0.354297	0.334703	0.463283
	497.991	0.2435		0.127824	-0.0644943	0.205978	-0.324713	0.130576		-0.389207	0.333801	0.464377
	497.992	0.987		0.128036	-0.0663569	0.203823	-0.346416	0.1145		-0.412773	0.331859	0.446359
	497.993	0.4		0.128208	-0.0681994	0.200672	-0.355776	0.0832348		-0.423975	0.32888	0.412115
	497.994	0.458333		0.128341	-0.0700191	0.196531	-0.35225	0.0414686		-0.422269	0.324871	0.36634
	497.995	0.656		0.128433	-0.0718138	0.191413	-0.335802	-0.00494231		-0.407616	0.319846	0.314904
	497.996	0.296		0.128486	-0.0735809	0.185333	-0.306912	-0.049777		-0.380493	0.31382	0.264043
	497.997	0.105		0.1285	-0.0753179	0.178313	-0.266566	-0.0873142		-0.341884	0.306813	0.219499
	497.998	-0.088		0.128473	-0.0770225	0.170377	-0.216234	-0.11313		-0.293257	0.29885	0.18572
	497.999	-0.322		0.128407	-0.0786922	0.161553	-0.157815	-0.12471		-0.236507	0.28996	0.16525
	498	-1.809		0.128301	-0.0803247	0.151874	-0.0935752	-0.121774		-0.1739	0.280175	0.158401
	498.001	-0.494		0.128155	-0.0819174	0.141376	-0.0260664	-0.106264		-0.107984	0.269531	0.163267
	498.002	-0.132333		0.12797	-0.083468	0.130098	0.0419715	-0.0819816		-0.0414966	0.258068	0.176086
	498.003	-0.149667		0.127745	-0.0849742	0.118084	0.107715	-0.0539392		0.0227408	0.245829	0.19189
	498.004	-0.254333		0.12748	-0.0864337	0.10538	0.168371	-0.0275087		0.0819374	0.23286	0.205352
	498.005	-0.352333		0.127176	-0.0878441	0.0920364	0.221291	-0.00751797		0.133447	0.219213	0.211695
	498.006	0.228		0.126833	-0.0892033	0.078105	0.264087	0.00256577		0.174883	0.204938	0.207503
	498.007	-0.485		0.12645	-0.0905089	0.0636411	0.294733	0.00122473		0.204225	0.190091	0.191316
	498.008	0.519		0.126028	-0.0917589	0.0487026	0.31167	-0.0108489		0.219911	0.17473	0.163881
	498.009	0.171		0.125567	-0.0929512	0.0333493	0.313876	-0.0308708		0.220925	0.158916	0.128045
	498.01	-0.733333		0.125066	-0.0940836	0.0176431	0.300935	-0.0544467		0.206852	0.142709	0.0882628
	498.011	-0.292333		0.124527	-0.0951542	0.00164765	0.273071	-0.0763434		0.177917	0.126175	0.0498315
	498.012	0.413		0.12395	-0.0961609	-0.0145719	0.231158	-0.091422		0.134997	0.109378	0.0179556
	498.013	-0.11		0.123333	-0.097102	-0.0309492	0.176709	-0.0955762		0.0796067	0.0923838	-0.0031924
	498.014	0.199		0.122678	-0.0979756	-0.0474171	0.111829	-0.0865168		0.013853	0.075261	-0.0112559
	498.015	0.517		0.121985	-0.09878	-0.0639077	0.0391444	-0.0642624		-0.0596356	0.0580771	-0.0061853
	498.016	0.513667		0.121253	-0.0995134	-0.0803528	-0.0382928	-0.0312478		-0.137806	0.0409007	0.00965292
	498.017	-0.474		0.120484	-0.100174	-0.096684	-0.117127	0.00797827		-0.217301	0.0238001	0.0317784
	498.018	0.652667		0.119677	-0.100761	-0.112833	-0.193836	0.0474233		-0.294597	0.00684363	0.0542669
	498.019	0.501333		0.118832	-0.101272	-0.128733	-0.264881	0.0805869		-0.366154	-0.00990097	0.0706859
	498.02	0.850333		0.11795	-0.101707	-0.144317	-0.326869	0.101511		-0.428576	-0.0263667	0.0751438
	498.021	0.396		0.117031	-0.102063	-0.159519	-0.376705	0.105772		-0.478768	-0.0424878	0.0632844
	498.022	-0.637		0.116075	-0.10234	-0.174274	-0.411748	0.0912605		-0.514089	-0.0581996	0.0330609
	498.023	-0.715		0.115082	-0.102537	-0.188521	-0.429946	0.0586023		-0.532483	-0.0734393	-0.014837
	498.024	-0.795		0.114052	-0.102652	-0.202198	-0.429947	0.0111677		-0.532599	-0.0881459	-0.0769782
	498.025	-1.93867		0.112986	-0.102686	-0.215247	-0.411192	-0.0453492		-0.513878	-0.102261	-0.14761
	498.026	-0.373333		0.111885	-0.102636	-0.227612	-0.373967	-0.103714		-0.476602	-0.115727	-0.219441
	498.027	-1.385		0.110747	-0.102502	-0.239239	-0.319416	-0.156173		-0.421918	-0.128492	-0.284665
	498.028	-1.21367		0.109574	-0.102284	-0.250078	-0.249525	-0.195568		-0.351809	-0.140504	-0.336072
	498.029	-1.023		0.108366	-0.101981	-0.260082	-0.167054	-0.216351		-0.269036	-0.151716	-0.368067
	498.03	-0.957667		0.107123	-0.101594	-0.269206	-0.0754423	-0.215378		-0.177036	-0.162083	-0.377461
	498.031	-0.759		0.105845	-0.101121	-0.277411	0.0213345	-0.19234		-0.0797861	-0.171566	-0.363906
	498.032	-1.47333		0.104533	-0.100562	-0.28466	0.118926	-0.149794		0.0183639	-0.180126	-0.329921
	498.033	-0.033		0.103187	-0.0999179	-0.290919	0.212798	-0.0927927		0.11288	-0.187732	-0.280525
	498.034	-1.42633		0.101808	-0.0991883	-0.296161	0.298439	-0.0281813		0.199251	-0.194354	-0.222535
	498.035	-0.694		0.100395	-0.0983736	-0.300361	0.371569	0.0363234		0.273196	-0.199967	-0.163643
	498.036	-1.324		0.0989485	-0.0974739	-0.3035	0.42835	0.0931371		0.330877	-0.204551	-0.111414
	498.037	2.423		0.0974698	-0.0964897	-0.30556	0.465578	0.135749		0.369088	-0.208091	-0.0723418
	498.038	1.847		0.0959587	-0.0954217	-0.306533	0.480851	0.159479		0.385429	-0.210574	-0.0510957
	498.039	0.78		0.0944156	-0.0942704	-0.306411	0.472711	0.161961		0.378441	-0.211995	-0.0500342
	498.04	0.53		0.0928409	-0.0930367	-0.305192	0.440741	0.143316		0.347704	-0.212351	-0.0690351
	498.041	-0.872333		0.091235	-0.0917215	-0.302879	0.385611	0.10601		0.29389	-0.211644	-0.105634
	498.042	-0.316667		0.0895982	-0.0903258	-0.29948	0.309091	0.0544598		0.218765	-0.209882	-0.155422
	498.043	0.0993333		0.0879309	-0.0888507	-0.295008	0.21399	-0.00555864		0.12514	-0.207077	-0.212635
	498.044	-0.494		0.0862335	-0.0872975	-0.289478	0.104066	-0.0675883		0.0167681	-0.203245	-0.270833
	498.045	-0.571		0.0845064	-0.0856675	-0.282913	-0.0161294	-0.125185		-0.101797	-0.198407	-0.323592
	498.046	-0.821667		0.08275	-0.0839623	-0.275339	-0.141431	-0.172546		-0.225393	-0.192589	-0.365134
	498.047	0.187		0.0809647	-0.0821835	-0.266785	-0.266287	-0.205021		-0.348471	-0.18582	-0.390842
	498.048	-0.514		0.079151	-0.0803327	-0.257286	-0.385005	-0.219489		-0.465337	-0.178135	-0.397624
	498.049	-1.389		0.0773092	-0.0784117	-0.246882	-0.492005	-0.21457		-0.570417	-0.169573	-0.384143
	498.05	-0.412333		0.0754399	-0.0764226	-0.235615	-0.582087	-0.190709		-0.65851	-0.160175	-0.350884
	498.051	-1.52967		0.0735433	-0.0743673	-0.223531	-0.650672	-0.150119		-0.725039	-0.149988	-0.300107
	498.052	-1.605		0.0716201	-0.072248	-0.210681	-0.694031	-0.0966074		-0.766279	-0.139061	-0.235668
	498.053	-1.06533		0.0696706	-0.0700668	-0.197118	-0.709474	-0.0352963		-0.77954	-0.127448	-0.162744
	498.054	-1.008		0.0676953	-0.0678262	-0.1829	-0.695498	0.0277658		-0.763324	-0.115204	-0.0874387
	498.055	-1.6505		0.0656946	-0.0655286	-0.168085	-0.651881	0.0860885		-0.71741	-0.10239	-0.0163018
	498.056	-1.078		0.0636691	-0.0631764	-0.152736	-0.579725	0.133311		-0.642901	-0.0890672	0.0442436
	498.057	-0.376667		0.0616192	-0.0607724	-0.136919	-0.481425	0.163828		-0.542198	-0.0752994	0.0885289
	498.058	-0.658333		0.0595453	-0.0583191	-0.120699	-0.3606	0.173433		-0.418919	-0.0611535	0.11228
	498.059	-0.706		0.0574481	-0.0558195	-0.104146	-0.221946	0.159898		-0.277766	-0.0466977	0.1132
	498.06	-1.55233		0.0553279	-0.0532763	-0.0873297	-0.0710519	0.123423		-0.124328	-0.0320018	0.0914214
	498.061	0.195		0.0531853	-0.0506925	-0.070322	0.085837	0.0668711		0.0351445	-0.0171367	0.0497343
	498.062	1.75433		0.0510207	-0.0480711	-0.0531952	0.242081	-0.00429877		0.19401	-0.00217445	-0.00647322
	498.063	1.896		0.0488348	-0.0454152	-0.036022	0.390938	-0.0824227		0.345522	0.0128127	-0.06961
	498.064	0.844		0.0466279	-0.042728	-0.0188758	0.525853	-0.158366		0.483125	0.0277521	-0.130614
	498.065	0.366		0.0444006	-0.0400127	-0.0018295	0.640758	-0.22254		0.600746	0.0425711	-0.179969
	498.066	0.34		0.0421535	-0.0372725	0.0150443	0.73034	-0.266104		0.693068	0.0571978	-0.208906
	498.067	0.0956667		0.0398871	-0.0345108	0.0316738	0.790284	-0.282195		0.755773	0.0715608	-0.210635
	498.068	1.005		0.0376018	-0.0317309	0.0479882	0.817478	-0.267024		0.785747	0.0855901	-0.181434
	498.069	0.858667		0.0352983	-0.0289363	0.0639185	0.810159	-0.220644		0.781223	0.0992168	-0.121427
	498.07	1.07		0.0329771	-0.0261304	0.079397	0.76801	-0.14726		0.74188	0.112374	-0.034886
	498.071	0.7445		0.0306388	-0.0233167	0.0943584	0.692187	-0.0549763		0.66887	0.124997	0.0700209
	498.072	1.034		0.0282838	-0.0204988	0.10874	0.585284	0.0450366		0.564785	0.137024	0.18206
	498.073	0.922333		0.0259128	-0.0176801	0.122481	0.451239	0.139872		0.433558	0.148394	0.288265
	498.074	0.447333		0.0235263	-0.0148643	0.135524	0.295174	0.216569		0.28031	0.15905	0.375619
	498.075	-2.96967		0.0211248	-0.012055	0.147816	0.123192	0.26392		0.111137	0.168941	0.432861
	498.076	1.30833		0.018709	-0.00925572	0.159306	-0.0578785	0.274144		-0.0671342	0.178015	0.452159
	498.077	1.364		0.0162795	-0.00647009	0.169946	-0.240764	0.244167		-0.247234	0.186226	0.430393
	498.078	0.5435		0.0138367	-0.00370174	0.179696	-0.418051	0.1763		-0.421753	0.193532	0.369833
	498.079	-0.999		0.0113813	-0.000954256	0.188514	-0.582495	0.0781748		-0.583449	0.199896	0.278071
	498.08	-0.432667		0.0089138	0.00176876	0.196369	-0.727322	-0.0380954		-0.725553	0.205283	0.167188
	498.081	-2.374		0.00643489	0.00446372	0.20323	-0.846516	-0.157432		-0.842052	0.209665	0.0522327
	498.082	-2.83733		0.0039451	0.00712706	0.209071	-0.935067	-0.263804		-0.92794	0.213016	-0.0507876
	498.083	-0.928333		0.00144504	0.00975523	0.213874	-0.989182	-0.342454		-0.979427	0.215319	-0.127135
	498.084	0.02		-0.0010647	0.0123447	0.217622	-1.00645	-0.382015		-0.994101	0.216557	-0.165458
	498.085	-0.799667		-0.00358353	0.0148921	0.220306	-0.985918	-0.376208		-0.971026	0.216722	-0.159485
	498.086	-0.805		-0.00611083	0.0173938	0.221919	-0.928175	-0.32485		-0.910782	0.215809	-0.109041
	498.087	-1.685		-0.00864601	0.0198466	0.222463	-0.835288	-0.234018		-0.815441	0.213817	-0.020201
	498.088	-0.75		-0.0111885	0.0222469	0.221941	-0.710735	-0.115312		-0.688488	0.210753	0.0954411
	498.089	-0.683333		-0.0137376	0.0245917	0.220364	-0.559262	0.0156867		-0.53467	0.206626	0.222313
	498.09	2.35333		-0.0162928	0.0268775	0.217746	-0.386689	0.141543		-0.359812	0.201453	0.342996
	498.091	1.98767		-0.0188534	0.0291012	0.214106	-0.199676	0.245392		-0.170575	0.195253	0.440645
	498.092	1.855		-0.0214188	0.0312598	0.20947	-0.0054501	0.3133		0.0258097	0.188051	0.501351
	498.093	1.877		-0.0239885	0.0333501	0.203865	0.188479	0.336211		0.221829	0.179876	0.516088
	498.094	1.7675		-0.0265617	0.0353691	0.197325	0.374622	0.311219		0.409991	0.170764	0.481983
	498.095	1.829		-0.029138	0.0373141	0.189889	0.545806	0.241946		0.58312	0.160751	0.402696
	498.096	1.664		-0.0317166	0.0391822	0.181596	0.695454	0.138003		0.734636	0.149879	0.287882
	498.097	1.759		-0.0342969	0.0409706	0.172493	0.817844	0.0136017		0.858815	0.138196	0.151798
	498.098	1.788		-0.0368783	0.0426767	0.162629	0.90833	-0.114471		0.951007	0.125751	0.0112798
	498.099	2.03033		-0.0394603	0.0442981	0.152057	0.963515	-0.229221		1.00781	0.112596	-0.116624
	498.1	2.071		-0.0420421	0.0458322	0.14083	0.981377	-0.315796		1.02721	0.0987882	-0.217008
	498.101	1.943		-0.0446231	0.0472767	0.129008	0.961343	-0.3635		1.00862	0.0843853	-0.279115
	498.102	1.234		-0.0472028	0.0486295	0.116652	0.904296	-0.367165		0.952926	0.0694488	-0.297716
	498.103	0.274667		-0.0497804	0.0498883	0.103822	0.812539	-0.327714		0.862428	0.0540418	-0.273672
	498.104	0.646		-0.0523555	0.0510512	0.0905847	0.689689	-0.251849		0.74074	0.0382293	-0.21362
	498.105	0.913667		-0.0549272	0.0521163	0.0770046	0.540531	-0.150937		0.592647	0.0220774	-0.12886
	498.106	0.524667		-0.0574951	0.0530819	0.0631487	0.370825	-0.0392702		0.423907	0.00565363	-0.0336165
	498.107	0.904667		-0.0600585	0.0539462	0.0490844	0.187079	0.0680143		0.241025	-0.0109741	0.0570403
	498.108	0.565333		-0.0626167	0.0547078	0.0348794	-0.00371252	0.157056		0.0509953	-0.0277374	0.129318
	498.109	0.847		-0.0651692	0.0553653	0.0206013	-0.194334	0.21712		-0.138968	-0.0445679	0.172552
	498.11	0.3875		-0.0677153	0.0559174	0.00631742	-0.37763	0.241925		-0.321712	-0.0613979	0.180527
	498.111	0.707		-0.0702544	0.0563629	-0.00790569	-0.54678	0.230278		-0.490417	-0.0781601	0.152118
	498.112	-0.653667		-0.0727859	0.0567009	-0.0220026	-0.695554	0.185962		-0.638853	-0.0947885	0.0911732
	498.113	-1.308		-0.0753091	0.0569304	-0.0359094	-0.818548	0.116926		-0.761617	-0.111219	0.00570794
	498.114	-1.32		-0.0778235	0.0570508	-0.0495639	-0.91138	0.0339403		-0.854329	-0.127387	-0.0934471
	498.115	-1.41233		-0.0803284	0.0570615	-0.0629059	-0.970852	-0.0510775		-0.91379	-0.143234	-0.194312
	498.116	-0.297		-0.0828232	0.056962	-0.0758777	-0.995059	-0.126782		-0.938097	-0.158701	-0.285483
	498.117	-2.85567		-0.0853072	0.056752	-0.0884244	-0.983452	-0.183934		-0.9267	-0.173732	-0.357665
	498.118	-1.941		-0.08778	0.0564313	-0.100494	-0.936845	-0.216528		-0.880414	-0.188274	-0.404802
	498.119	-1.71633		-0.0902407	0.0559999	-0.112037	-0.857373	-0.222385		-0.801373	-0.202278	-0.424663
	498.12	-0.514		-0.092689	0.0554579	-0.123009	-0.748395	-0.203149		-0.692937	-0.215698	-0.418846
	498.121	-1.622		-0.0951241	0.0548056	-0.133367	-0.614354	-0.163745		-0.559548	-0.228491	-0.392236
	498.122	-0.271333		-0.0975454	0.0540433	-0.143074	-0.460599	-0.111406		-0.406556	-0.24062	-0.352026
	498.123	-1.147		-0.0999523	0.0531716	-0.152096	-0.293168	-0.0544523		-0.239996	-0.252049	-0.306501
	498.124	-1.05667		-0.102344	0.0521911	-0.160403	-0.118545	-0.00100855		-0.0663536	-0.262748	-0.263756
	498.125	-0.423		-0.104721	0.0511028	-0.167969	0.0565884	0.0421267		0.107691	-0.27269	-0.230564
	498.126	-0.364		-0.107081	0.0499075	-0.174774	0.225617	0.070323		0.275524	-0.281855	-0.211532
	498.127	-0.471		-0.109425	0.0486064	-0.180799	0.382246	0.0815596		0.430853	-0.290224	-0.208664
	498.128	-1.49767		-0.111751	0.0472008	-0.186034	0.520746	0.0764391		0.567946	-0.297784	-0.221345
	498.129	-1.574		-0.114059	0.0456919	-0.190468	0.63616	0.057808		0.681852	-0.304527	-0.246719
	498.13	-0.976		-0.116349	0.0440814	-0.1941	0.724499	0.0300789		0.76858	-0.310449	-0.28037
	498.131	2.308		-0.118619	0.0423709	-0.196929	0.782877	-0.00161358		0.825248	-0.315549	-0.317162
	498.132	1.231		-0.12087	0.0405622	-0.198961	0.809614	-0.0322762		0.850176	-0.319831	-0.352108
	498.133	1.58467		-0.123101	0.0386573	-0.200204	0.804287	-0.0578006		0.842944	-0.323305	-0.381106
	498.134	1.202		-0.125311	0.0366581	-0.200672	0.767725	-0.0754804		0.804383	-0.325983	-0.401463
	498.135	-0.306333		-0.1275	0.034567	-0.20038	0.701965	-0.0842402		0.736532	-0.32788	-0.41212
	498.136	-0.061		-0.129667	0.0323861	-0.199351	0.610147	-0.0845669		0.642533	-0.329017	-0.413584
	498.137	-0.164667		-0.131811	0.030118	-0.197607	0.496374	-0.0781855		0.526493	-0.329418	-0.407604
	498.138	-0.410333		-0.133932	0.0277653	-0.195177	0.365536	-0.0675602		0.393301	-0.329109	-0.396669
	498.139	0.784		-0.13603	0.0253305	-0.19209	0.223093	-0.0553271		0.248424	-0.32812	-0.383447
	498.14	0.197		-0.138104	0.0228166	-0.18838	0.0748533	-0.0437682		0.0976699	-0.326484	-0.370252
	498.141	-0.242		-0.140153	0.0202264	-0.184083	-0.0732732	-0.0344205		-0.0530468	-0.324235	-0.358656
	498.142	0.133		-0.142176	0.017563	-0.179236	-0.215514	-0.0278861		-0.197951	-0.321412	-0.349298
	498.143	-0.311		-0.144175	0.0148294	-0.173879	-0.346469	-0.0238633		-0.33164	-0.318054	-0.341917
	498.144	-0.154333		-0.146147	0.0120289	-0.168055	-0.461322	-0.0213794		-0.449293	-0.314202	-0.335581
	498.145	-0.513		-0.148092	0.00916493	-0.161806	-0.556026	-0.0191652		-0.546861	-0.309897	-0.329063
	498.146	-0.702		-0.15001	0.00624081	-0.155175	-0.627455	-0.0160831		-0.621214	-0.305185	-0.321268
	498.147	-0.574		-0.1519	0.00326009	-0.148209	-0.673512	-0.0115149		-0.670252	-0.300109	-0.311624
	498.148	-1.061		-0.153762	0.000226377	-0.140952	-0.693193	-0.00561945		-0.692966	-0.294714	-0.300333
	498.149	-1.322		-0.155596	-0.00285664	-0.133449	-0.686597	0.000601139		-0.689454	-0.289045	-0.288444
	498.15	-1.017		-0.1574	-0.00598519	-0.125747	-0.654902	0.00545014		-0.660887	-0.283147	-0.277696
	498.151	-0.631		-0.159174	-0.00915543	-0.117889	-0.60028	0.00688037		-0.609435	-0.277064	-0.270183
	498.152	-0.007		-0.160919	-0.0123634	-0.109921	-0.52578	0.00297139		-0.538143	-0.27084	-0.267868
	498.153	-1.35167		-0.162633	-0.0156053	-0.101885	-0.435176	-0.00755324		-0.450781	-0.264517	-0.272071
	498.154	-0.0113333		-0.164315	-0.0188768	-0.093823	-0.33278	-0.0248772		-0.351657	-0.258138	-0.283016
	498.155	0.847		-0.165967	-0.0221741	-0.085776	-0.223245	-0.0478135		-0.245419	-0.251743	-0.299556
	498.156	0.603333		-0.167586	-0.0254928	-0.0777827	-0.11135	-0.0737753		-0.136843	-0.245369	-0.319144
	498.157	0.725		-0.169173	-0.0288289	-0.0698798	-0.00179267	-0.0990294		-0.0306216	-0.239053	-0.338082
	498.158	1.087		-0.170727	-0.0321781	-0.0621021	0.101015	-0.119216		0.0688373	-0.232829	-0.352045
	498.159	1.282		-0.172248	-0.035536	-0.054482	0.193129	-0.130062		0.157593	-0.22673	-0.356792
	498.16	1.09833		-0.173735	-0.0388986	-0.0470497	0.271226	-0.128178		0.232327	-0.220785	-0.348963
	498.161	0.949667		-0.175188	-0.0422613	-0.0398324	0.332733	-0.111793		0.290471	-0.215021	-0.326814
	498.162	0.220333		-0.176607	-0.0456199	-0.0328551	0.375907	-0.0812896		0.330287	-0.209462	-0.290752
	498.163	2.18433		-0.177991	-0.04897	-0.0261397	0.399884	-0.0394161		0.350914	-0.204131	-0.243547
	498.164	2.052		-0.17934	-0.0523073	-0.0197055	0.404681	0.00889127		0.352373	-0.199045	-0.190154
	498.165	1.12033		-0.180653	-0.0556274	-0.0135686	0.391158	0.0570844		0.33553	-0.194221	-0.137137
	498.166	-0.215		-0.18193	-0.0589259	-0.00774274	0.360944	0.0979142		0.302018	-0.189673	-0.0917584
	498.167	1.35324		-0.183171	-0.0621984	-0.00223833	0.316332	0.124547		0.254133	-0.185409	-0.0608621
	498.168	2.277		-0.184375	-0.0654407	0.00293683	0.260139	0.131712		0.194698	-0.181438	-0.0497262
	498.169	1.36667		-0.185542	-0.0686484	0.00777778	0.195561	0.116686		0.126912	-0.177764	-0.0610783
	498.17	1.56567		-0.186671	-0.0718172	0.0122823	0.126001	0.079935		0.054184	-0.174389	-0.094454
	498.171	-0.306		-0.187763	-0.0749429	0.0164506	0.0549076	0.0252805		-0.0200353	-0.171313	-0.146032
	498.172	-0.242		-0.188817	-0.0780211	0.0202858	-0.014392	-0.0404752		-0.0924132	-0.168531	-0.209007
	498.173	-0.267		-0.189833	-0.0810479	0.0237929	-0.0788384	-0.10843		-0.159886	-0.16604	-0.27447
	498.174	-0.312		-0.19081	-0.0840189	0.0269795	-0.135771	-0.168862		-0.21979	-0.16383	-0.332692
	498.175	-0.574		-0.191748	-0.0869302	0.029855	-0.183034	-0.212707		-0.269964	-0.161893	-0.3746
	498.176	1.075		-0.192647	-0.0897776	0.0324309	-0.219051	-0.233017		-0.308828	-0.160216	-0.393233
	498.177	-0.404667		-0.193506	-0.0925573	0.0347202	-0.242869	-0.226138		-0.335427	-0.158786	-0.384924
	498.178	-0.550333		-0.194326	-0.0952653	0.0367375	-0.254176	-0.19241		-0.349442	-0.157589	-0.349999
	498.179	-0.752667		-0.195106	-0.0978979	0.0384986	-0.253277	-0.136257		-0.351175	-0.156607	-0.292864
	498.18	-1.156		-0.195845	-0.100451	0.0400205	-0.241048	-0.0656062		-0.341499	-0.155825	-0.221431
	498.181	-1.08567		-0.196544	-0.102922	0.0413209	-0.218866	0.00926073		-0.321788	-0.155224	-0.145963
	498.182	-0.71		-0.197203	-0.105306	0.0424182	-0.188514	0.0772857		-0.29382	-0.154785	-0.077499
	498.183	0.6684		-0.19782	-0.1076	0.043331	-0.152075	0.128374		-0.259675	-0.154489	-0.0261158
	498.184	0.841		-0.198397	-0.109801	0.0440785	-0.111817	0.155018		-0.221619	-0.154318	0.000699509
	498.185	0.919667		-0.198932	-0.111906	0.0446793	-0.0700735	0.153538		-0.181979	-0.154252	-0.000714339
	498.186	-0.145333		-0.199425	-0.113911	0.0451521	-0.0291285	0.124714		-0.14304	-0.154273	-0.0295591
	498.187	0.212		-0.199877	-0.115813	0.0455151	0.00888753	0.0736945		-0.106926	-0.154362	-0.0806676
	498.188	-0.751		-0.200287	-0.11761	0.0457857	0.0420919	0.00918375		-0.0755184	-0.154502	-0.145318
	498.189	-0.255		-0.200655	-0.119299	0.0459804	0.0689247	-0.0579758		-0.0503743	-0.154675	-0.212651
	498.19	-0.584333		-0.200981	-0.120877	0.0461147	0.0882051	-0.116597		-0.0326716	-0.154867	-0.271463
	498.191	-0.692		-0.201265	-0.122341	0.0462029	0.0991668	-0.157021		-0.0231742	-0.155062	-0.312083
	498.192	-2.33145		-0.201506	-0.123689	0.0462578	0.101472	-0.172763		-0.0222173	-0.155248	-0.328011
	498.193	-2.1821		-0.201705	-0.12492	0.046291	0.0952072	-0.161632		-0.0297128	-0.155414	-0.317045
	498.194	-2.03274		-0.201861	-0.12603	0.046312	0.0808565	-0.126146		-0.0451738	-0.155549	-0.281695
	498.195	-1.88339		-0.201974	-0.127019	0.0463288	0.0592642	-0.0731493		-0.0677544	-0.155645	-0.228795
	498.196	-1.73403		-0.202045	-0.127883	0.0463477	0.0315807	-0.0126736		-0.0963024	-0.155697	-0.168371
	498.197	-1.58468		-0.202072	-0.128622	0.0463728	-0.000799134	0.0437538		-0.129421	-0.1557	-0.111946
	498.198	-1.43532		-0.202057	-0.129234	0.0464064	-0.0363042	0.0850998		-0.165538	-0.155651	-0.0705509
	498.199	-1.28597		-0.201999	-0.129718	0.0464488	-0.0732575	0.102771		-0.202976	-0.15555	-0.0527788
	498.2	-1.13661		-0.201897	-0.130073	0.0464984	-0.109947	0.0921879		-0.24002	-0.155399	-0.0632112
	498.201	-0.987258		-0.201753	-0.130297	0.0465514	-0.14469	0.05371		-0.274988	-0.155202	-0.101492
	498.202	-0.837903		-0.201566	-0.130391	0.0466023	-0.1759	-0.00724971		-0.306291	-0.154963	-0.162213
	498.203	-0.688548		-0.201335	-0.130352	0.0466435	-0.202136	-0.0809671		-0.332488	-0.154691	-0.235658
	498.204	-0.858		-0.201061	-0.130182	0.0466657	-0.22215	-0.154897		-0.352332	-0.154395	-0.309292
	498.205	-0.847		-0.200744	-0.129879	0.0466577	-0.23493	-0.215681		-0.364809	-0.154086	-0.369767
	498.206	-0.724		-0.200384	-0.129444	0.0466069	-0.239722	-0.25136		-0.369165	-0.153777	-0.405138
	498.207	-0.510333		-0.199981	-0.128876	0.046499	-0.236056	-0.253431		-0.364932	-0.153482	-0.406913
	498.208	-0.584		-0.199535	-0.128176	0.0463183	-0.223758	-0.218406		-0.351934	-0.153217	-0.371623
	498.209	-0.259333		-0.199046	-0.127345	0.046048	-0.202955	-0.148628		-0.3303	-0.152998	-0.301626
	498.21	0.804333		-0.198514	-0.126382	0.0456702	-0.174071	-0.0521711		-0.300453	-0.152844	-0.205015
	498.211	1.36733		-0.19794	-0.125289	0.045166	-0.137821	0.0581509		-0.26311	-0.152774	-0.0946227
	498.212	1.56033		-0.197322	-0.124068	0.044516	-0.0951944	0.16656		-0.219262	-0.152806	0.0137541
	498.213	1.54367		-0.196662	-0.122718	0.0437001	-0.0474336	0.256598		-0.170151	-0.152962	0.103637
	498.214	0.843		-0.195959	-0.121241	0.042698	0.00399347	0.313586		-0.117248	-0.153261	0.160325
	498.215	1.304		-0.195214	-0.119639	0.0414895	0.0574286	0.326892		-0.0622109	-0.153725	0.173167
	498.216	0.961667		-0.194427	-0.117914	0.0400541	0.111064	0.291662		-0.00685059	-0.154373	0.137289
	498.217	0.079		-0.193597	-0.116068	0.038372	0.16299	0.209753		0.0469219	-0.155225	0.0545279
	498.218	-0.004		-0.192726	-0.114102	0.0364239	0.21125	0.0897163		0.0971477	-0.156302	-0.0665857
	498.219	0.25		-0.191813	-0.112019	0.0341913	0.2539	-0.0541848		0.14188	-0.157621	-0.211806
	498.22	-0.504667		-0.190858	-0.109822	0.0316566	0.289073	-0.203781		0.179251	-0.159201	-0.362982
	498.221	-1.569		-0.189861	-0.107512	0.0288035	0.31505	-0.339398		0.207538	-0.161058	-0.500456
	498.222	-1.596		-0.188823	-0.105093	0.0256171	0.330328	-0.442507		0.225235	-0.163206	-0.605713
	498.223	-0.262		-0.187744	-0.102568	0.0220841	0.333693	-0.498277		0.231125	-0.16566	-0.663937
	498.224	0.447333		-0.186625	-0.0999393	0.0181931	0.32428	-0.497656		0.224341	-0.168431	-0.666087
	498.225	-0.249		-0.185464	-0.0972108	0.0139346	0.30164	-0.438721		0.204429	-0.171529	-0.61025
	498.226	0.735333		-0.184263	-0.0943858	0.00930129	0.26578	-0.327084		0.171395	-0.174962	-0.502046
	498.227	0.83		-0.183022	-0.0914679	0.00428815	0.217209	-0.175312		0.125741	-0.178734	-0.354046
	498.228	0.928333		-0.181741	-0.0884607	-0.00110738	0.156945	-0.00142231		0.0684847	-0.182849	-0.184271
	498.229	0.391		-0.180421	-0.0853681	-0.00688529	0.0865232	0.173354		0.00115509	-0.187306	-0.0139519
	498.23	0.033		-0.179061	-0.0821942	-0.0130429	0.00796684	0.327249		-0.0742273	-0.192104	0.135146
	498.231	0.069		-0.177662	-0.0789431	-0.0195747	-0.0762543	0.440739		-0.155197	-0.197236	0.243503
	498.232	0.22		-0.176224	-0.075619	-0.0264725	-0.163294	0.499063		-0.238913	-0.202696	0.296367
	498.233	-0.3015		-0.174747	-0.0722265	-0.0337251	-0.25002	0.49416		-0.322246	-0.208472	0.285687
	498.234	0.562		-0.173233	-0.06877	-0.0413183	-0.333121	0.425774		-0.401891	-0.214551	0.211222
	498.235	-0.182333		-0.17168	-0.0652541	-0.0492352	-0.409238	0.301571		-0.474492	-0.220916	0.0806555
	498.236	0.082		-0.17009	-0.0616836	-0.0574558	-0.475095	0.136259		-0.536779	-0.227546	-0.0912873
	498.237	0.323333		-0.168463	-0.0580634	-0.0659573	-0.527646	-0.0502028		-0.58571	-0.234421	-0.284624
	498.238	-0.391		-0.1668	-0.0543984	-0.074714	-0.564215	-0.235069		-0.618613	-0.241514	-0.476583
	498.239	-1.556		-0.165099	-0.0506936	-0.0836975	-0.58263	-0.395654		-0.633324	-0.248797	-0.64445
	498.24	-2.524		-0.163363	-0.0469541	-0.0928766	-0.581347	-0.512187		-0.628301	-0.25624	-0.768427
	498.241	-2.20233		-0.161591	-0.0431852	-0.102218	-0.559544	-0.570332		-0.602729	-0.263809	-0.834141
	498.242	-2.55867		-0.159784	-0.0393921	-0.111685	-0.517197	-0.563019		-0.556589	-0.271468	-0.834487
	498.243	-2.552		-0.157942	-0.0355801	-0.121239	-0.455121	-0.491369		-0.490701	-0.279181	-0.770549
	498.244	-2.06		-0.156065	-0.0317546	-0.13084	-0.374969	-0.364573		-0.406724	-0.286905	-0.651479
	498.245	-0.592		-0.154155	-0.0279211	-0.140446	-0.279208	-0.198736		-0.307129	-0.294601	-0.493337
	498.246	-0.42		-0.152211	-0.024085	-0.150012	-0.171038	-0.0148158		-0.195123	-0.302223	-0.317038
	498.247	-0.567		-0.150233	-0.0202517	-0.159493	-0.0542933	0.164064		-0.074545	-0.309726	-0.145663
	498.248	-0.575667		-0.148223	-0.0164269	-0.168841	0.0667012	0.31559		0.0502743	-0.317065	-0.00147482
	498.249	-0.865		-0.146181	-0.0126161	-0.17801	0.187298	0.421137		0.174682	-0.324191	0.0969468
	498.25	-1.36933		-0.144107	-0.0088247	-0.186949	0.302714	0.468156		0.29389	-0.331056	0.1371
	498.251	2.067		-0.142002	-0.00505838	-0.195609	0.408234	0.451755		0.403176	-0.337611	0.114144
	498.252	1.82933		-0.139866	-0.00132264	-0.203942	0.499413	0.375272		0.49809	-0.343807	0.0314646
	498.253	1.89267		-0.1377	0.00237701	-0.211897	0.572274	0.249749		0.574651	-0.349596	-0.0998473
	498.254	1.759		-0.135503	0.00603507	-0.219425	0.623499	0.0923825		0.629534	-0.354928	-0.262546
	498.255	0.789333		-0.133278	0.00964609	-0.226478	0.650579	-0.0758263		0.660225	-0.359756	-0.435582
	498.256	1.279		-0.131024	0.0132047	-0.233007	0.651947	-0.232909		0.665152	-0.364031	-0.596941
	498.257	0.288		-0.128742	0.0167054	-0.238968	0.627069	-0.358859		0.643774	-0.367709	-0.726568
	498.258	0.803		-0.126432	0.020143	-0.244313	0.576479	-0.438247		0.596622	-0.370745	-0.808991
	498.259	-1.63033		-0.124094	0.0235122	-0.249	0.501787	-0.462179		0.5253	-0.373095	-0.835274
	498.26	-0.227		-0.121731	0.0268079	-0.252988	0.405623	-0.429326		0.432431	-0.374719	-0.804045
	498.261	0.386		-0.119341	0.030025	-0.256238	0.29154	-0.345907		0.321565	-0.375579	-0.721486
	498.262	-0.067		-0.116926	0.0331585	-0.258713	0.16388	-0.224644		0.197039	-0.375639	-0.600283
	498.263	-0.319333		-0.114486	0.0362035	-0.26038	0.0275973	-0.0828673		0.0638008	-0.374866	-0.457733
	498.264	-0.014		-0.112021	0.0391552	-0.261208	-0.111949	0.0599606		-0.0727933	-0.37323	-0.313269
	498.265	0.266667		-0.109533	0.042009	-0.261171	-0.249213	0.184926		-0.207204	-0.370704	-0.185778
	498.266	-0.0696667		-0.107022	0.0447604	-0.260243	-0.378704	0.276185		-0.333943	-0.367265	-0.0910804
	498.267	-1.588		-0.104488	0.0474048	-0.258407	-0.495211	0.322974		-0.447807	-0.362895	-0.0399208
	498.268	-0.888667		-0.101933	0.0499381	-0.255644	-0.594034	0.320853		-0.544096	-0.357577	-0.0367236
	498.269	-0.256		-0.0993559	0.0523562	-0.251944	-0.671179	0.272042		-0.618823	-0.3513	-0.0792581
	498.27	-2.92633		-0.0967584	0.054655	-0.247299	-0.723532	0.184839		-0.668877	-0.344058	-0.159219
	498.271	-1.088		-0.0941409	0.0568307	-0.241706	-0.748992	0.0722496		-0.692161	-0.335846	-0.263597
	498.272	-2.07733		-0.091504	0.0588798	-0.235164	-0.746558	-0.0499493		-0.687679	-0.326668	-0.376618
	498.273	-2.174		-0.0888484	0.0607988	-0.227681	-0.716376	-0.165419		-0.655577	-0.316529	-0.481949
	498.274	-0.715		-0.0861746	0.0625843	-0.219266	-0.659723	-0.259425		-0.597139	-0.30544	-0.564865
	498.275	-2.36		-0.0834835	0.0642333	-0.209933	-0.578958	-0.320666		-0.514724	-0.293417	-0.614082
	498.276	-0.388333		-0.0807755	0.0657429	-0.199703	-0.47741	-0.342551		-0.411668	-0.280478	-0.62303
	498.277	-0.637		-0.0780515	0.0671103	-0.188599	-0.359244	-0.323793		-0.292134	-0.26665	-0.590443
	498.278	-0.999667		-0.075312	0.0683331	-0.17665	-0.229273	-0.268275		-0.16094	-0.251962	-0.520236
	498.279	-0.191		-0.0725577	0.069409	-0.163888	-0.0927552	-0.18428		-0.0233462	-0.236446	-0.420726
	498.28	0.778667		-0.0697893	0.0703358	-0.150352	0.044827	-0.0832238		0.115163	-0.220142	-0.303365
	498.281	0.512667		-0.0670075	0.0711118	-0.136084	0.177999	0.0219181		0.249111	-0.203091	-0.181173
	498.282	0.404333		-0.064213	0.0717353	-0.121128	0.301521	0.118249		0.373256	-0.185341	-0.0670917
	498.283	0.165333		-0.0614065	0.0722049	-0.105535	0.410603	0.194471		0.482808	-0.166942	0.0275289
	498.284	0.298		-0.0585886	0.0725194	-0.0893599	0.501097	0.242102		0.573616	-0.147949	0.0941538
	498.285	1.35133		-0.0557602	0.0726779	-0.0726588	0.56966	0.256294		0.642338	-0.128419	0.127875
	498.286	0.663		-0.0529217	0.0726796	-0.055493	0.613884	0.236183		0.686564	-0.108415	0.127768
	498.287	-0.235333		-0.0500741	0.072524	-0.0379265	0.632378	0.184786		0.704902	-0.0880006	0.0967858
	498.288	-0.189		-0.047218	0.072211	-0.0200262	0.624811	0.108508		0.697022	-0.0672442	0.0412638
	498.289	0.0195		-0.044354	0.0717406	-0.00186162	0.591909	0.0163163		0.66365	-0.0462156	-0.0298994
	498.29	0.115		-0.041483	0.0711129	0.0164955	0.535409	-0.0812785		0.606522	-0.0249875	-0.106266
	498.291	0.404		-0.0386057	0.0703285	0.0349713	0.457968	-0.173352		0.528296	-0.00363431	-0.176987
	498.292	0.778		-0.0357227	0.0693882	0.0534905	0.363036	-0.249691		0.432424	0.0177678	-0.231923
	498.293	-0.0163333		-0.0328348	0.0682929	0.071976	0.254705	-0.301816		0.322998	0.0391413	-0.262675
	498.294	-0.288667		-0.0299427	0.0670438	0.0903504	0.137525	-0.323835		0.204568	0.0604077	-0.263428
	498.295	0.223667		-0.0270472	0.0656424	0.108535	0.0163088	-0.313045		0.0819512	0.081488	-0.231557
	498.296	-0.230667		-0.0241489	0.0640905	0.126452	-0.104066	-0.27024		-0.0399753	0.102303	-0.167937
	498.297	-0.592		-0.0212487	0.0623899	0.144022	-0.218861	-0.199692		-0.156471	0.122773	-0.0769191
	498.298	0.151667		-0.0183473	0.060543	0.161167	-0.323666	-0.108789		-0.263123	0.14282	0.0340303
	498.299	-0.368		-0.0154453	0.0585521	0.177811	-0.414573	-0.00734034		-0.356021	0.162366	0.155025
	498.3	0.0546667		-0.0125436	0.0564198	0.193877	-0.488322	0.093403		-0.431903	0.181334	0.274737
	498.301	-1.787		-0.0096428	0.0541492	0.209292	-0.542421	0.18193		-0.488272	0.199649	0.381579
	498.302	-0.6635		-0.00674374	0.0517433	0.223983	-0.575228	0.247752		-0.523485	0.217239	0.464992
	498.303	-1.404		-0.00384713	0.0492055	0.23788	-0.586001	0.282651		-0.536795	0.234033	0.516685
	498.304	1.75767		-0.000953711	0.0465393	0.250917	-0.574903	0.281731		-0.528364	0.249964	0.531694
	498.305	2.179		0.00193578	0.0437486	0.263029	-0.542978	0.244146		-0.49923	0.264965	0.509111
	498.306	1.30833		0.00482059	0.0408374	0.274156	-0.492083	0.173387		-0.451246	0.278977	0.452364
	498.307	1.314		0.00769999	0.0378097	0.284241	-0.424793	0.0770418		-0.386983	0.291941	0.368983
	498.308	-0.0366667		0.0105732	0.0346701	0.29323	-0.344278	-0.0339649		-0.309608	0.303804	0.269839
	498.309	-1.48333		0.0134396	0.0314232	0.301076	-0.254159	-0.14659		-0.222736	0.314516	0.167926
	498.31	-0.284667		0.0162983	0.0280737	0.307734	-0.158346	-0.247227		-0.130272	0.324032	0.0768054
	498.311	0.193667		0.0191486	0.0246265	0.313164	-0.0608692	-0.323402		-0.0362427	0.332313	0.00891136
	498.312	-0.012		0.0219899	0.0210869	0.317333	0.0342867	-0.365395		0.0553736	0.339323	-0.0260713
	498.313	-0.122		0.0248213	0.01746	0.320212	0.12335	-0.367561		0.14081	0.345033	-0.0225278
	498.314	-0.563		0.0276421	0.0137514	0.321776	0.202912	-0.329161		0.216663	0.349419	0.0202572
	498.315	2.06333		0.0304515	0.00996668	0.322009	0.270056	-0.254565		0.280022	0.35246	0.0978948
	498.316	1.899		0.033249	0.00611153	0.320896	0.32247	-0.152782		0.328582	0.354145	0.201362
	498.317	1.541		0.0360337	0.00219184	0.318431	0.358527	-0.03636		0.360719	0.354465	0.318105
	498.318	1.564		0.0388048	-0.0017864	0.314615	0.377331	0.0802115		0.375544	0.35342	0.433631
	498.319	1.42167		0.0415618	-0.00581709	0.309451	0.378739	0.18238		0.372922	0.351012	0.533392
	498.32	1.363		0.0443038	-0.00989402	0.30295	0.363348	0.25744		0.353454	0.347253	0.604693
	498.321	1.40367		0.0470301	-0.0140109	0.295129	0.332447	0.296207		0.318436	0.342159	0.638366
	498.322	1.46833		0.0497401	-0.0181613	0.286011	0.287942	0.294223		0.269781	0.335751	0.629974
	498.323	1.74767		0.0524329	-0.0223389	0.275623	0.232265	0.252317		0.209926	0.328056	0.580373
	498.324	1.454		0.055108	-0.026537	0.264	0.168247	0.176455		0.14171	0.319108	0.495564
	498.325	0.374333		0.0577645	-0.0307491	0.251182	0.0989903	0.0768872		0.0682411	0.308946	0.385834
	498.326	1.629		0.0604019	-0.0349687	0.237212	0.0277224	-0.0332733		-0.00724628	0.297614	0.264341
	498.327	1.634		0.0630193	-0.039189	0.222141	-0.0423453	-0.13984		-0.0815344	0.285161	0.14532
	498.328	0.953		0.0656161	-0.0434034	0.206024	-0.108161	-0.229462		-0.151564	0.27164	0.0421783
	498.329	-0.406		0.0681917	-0.0476053	0.18892	-0.166963	-0.291372		-0.214568	0.257112	-0.03426
	498.33	-0.2585		0.0707453	-0.0517879	0.170893	-0.216394	-0.318751		-0.268182	0.241639	-0.0771122
	498.331	-0.897		0.0732762	-0.0559446	0.152013	-0.254602	-0.309513		-0.310546	0.225289	-0.0842239
	498.332	-0.077		0.0757838	-0.0600688	0.13235	-0.280303	-0.266419		-0.340371	0.208133	-0.0582859
	498.333	0.066		0.0782674	-0.0641539	0.11198	-0.292834	-0.196534		-0.356988	0.190248	-0.00628665
	498.334	0.305333		0.0807264	-0.0681932	0.0909838	-0.292164	-0.110106		-0.360357	0.17171	0.0616043
	498.335	-0.825		0.08316	-0.0721805	0.0694419	-0.278884	-0.019056		-0.351064	0.152602	0.133546
	498.336	-0.0196667		0.0855677	-0.0761091	0.0474393	-0.254162	0.0646965		-0.330271	0.133007	0.197703
	498.337	-0.044		0.0879488	-0.0799728	0.0250624	-0.21968	0.130841		-0.299653	0.113011	0.243853
	498.338	0.362		0.0903026	-0.0837653	0.00239975	-0.177544	0.171989		-0.261309	0.0927023	0.264691
	498.339	0.505		0.0926285	-0.0874804	-0.0204589	-0.130175	0.184513		-0.217655	0.0721696	0.256682
	498.34	0.126		0.0949259	-0.0911121	-0.0434227	-0.0801884	0.168836		-0.1713	0.0515032	0.220339
	498.341	-0.154667		0.0971941	-0.0946545	-0.0664003	-0.0302675	0.129136		-0.124922	0.0307938	0.159929
	498.342	-0.17		0.0994326	-0.0981018	-0.0893003	0.0169676	0.0725407		-0.0811342	0.0101323	0.0826731
	498.343	-1.287		0.101641	-0.101448	-0.112031	0.0590853	0.00796284		-0.042363	-0.0103906	-0.00242772
	498.344	-0.469		0.103818	-0.104688	-0.134503	0.0939573	-0.0552601		-0.0107312	-0.0306848	-0.085945
	498.345	-0.1385		0.105964	-0.107817	-0.156625	0.119859	-0.108702		0.0120418	-0.0506615	-0.159364
	498.346	-0.031		0.108077	-0.110829	-0.17831	0.135549	-0.145982		0.0247198	-0.070233	-0.216215
	498.347	0.007		0.110158	-0.113719	-0.199472	0.140325	-0.163533		0.0266061	-0.0893137	-0.252847
	498.348	-1.04		0.112205	-0.116482	-0.220025	0.134057	-0.160925		0.0175743	-0.10782	-0.268745
	498.349	-0.193667		0.114219	-0.119115	-0.23989	0.117186	-0.140711		-0.00192897	-0.125671	-0.266382
	498.35	-0.0906667		0.116198	-0.121611	-0.258987	0.0907032	-0.107839		-0.0309082	-0.142789	-0.250627
	498.351	-0.919333		0.118142	-0.123968	-0.277241	0.0560991	-0.0687437		-0.0678692	-0.159098	-0.227842
	498.352	-0.571667		0.120051	-0.126181	-0.29458	0.0152876	-0.0302661		-0.110894	-0.174529	-0.204795
	498.353	-0.663333		0.121924	-0.128247	-0.310937	-0.0294866	0.00143965		-0.157734	-0.189013	-0.187574
	498.354	-1.023		0.12376	-0.130162	-0.326248	-0.0757595	0.0218362		-0.205921	-0.202488	-0.180652
	498.355	-0.494		0.125559	-0.131922	-0.340454	-0.120968	0.0286428		-0.25289	-0.214895	-0.186252
	498.356	-0.863		0.127321	-0.133525	-0.353501	-0.162575	0.0220936		-0.2961	-0.22618	-0.204086
	498.357	-0.789		0.129044	-0.134968	-0.365338	-0.198197	0.00478612		-0.333165	-0.236294	-0.231508
	498.358	-1.4595		0.130729	-0.136249	-0.375923	-0.22572	-0.0188476		-0.361969	-0.245193	-0.264041
	498.359	-0.843		0.132375	-0.137365	-0.385215	-0.243408	-0.0433583		-0.380773	-0.25284	-0.296198
	498.36	-0.302		0.133982	-0.138313	-0.393181	-0.24999	-0.063253		-0.388303	-0.259199	-0.322452
	498.361	-0.512		0.135548	-0.139094	-0.399793	-0.244728	-0.073971		-0.383821	-0.264245	-0.338216
	498.362	-0.472		0.137075	-0.139704	-0.405029	-0.22746	-0.0727055		-0.367164	-0.267954	-0.34066
	498.363	-0.502		0.13856	-0.140143	-0.408872	-0.19862	-0.0589389		-0.338763	-0.270312	-0.329251
	498.364	-0.213		0.140004	-0.14041	-0.411311	-0.15922	-0.0346015		-0.29963	-0.271307	-0.305908
	498.365	-0.429333		0.141407	-0.140505	-0.412341	-0.110816	-0.00381908		-0.251321	-0.270934	-0.274753
	498.366	-0.279		0.142767	-0.140426	-0.411962	-0.0554454	0.0277196		-0.195872	-0.269195	-0.241476
	498.367	-0.25		0.144085	-0.140175	-0.410182	0.00446645	0.0536864		-0.135708	-0.266097	-0.21241
	498.368	-1.247		0.14536	-0.13975	-0.407011	0.0662069	0.0681909		-0.0735436	-0.261651	-0.19346
	498.369	0.171333		0.146592	-0.139154	-0.402469	0.126899	0.066841		-0.0122548	-0.255877	-0.189036
	498.37	-0.124		0.147781	-0.138386	-0.396577	0.183631	0.0476175		0.0452457	-0.248797	-0.201179
	498.371	-0.345333		0.148925	-0.137447	-0.389365	0.233591	0.0114097		0.0961437	-0.24044	-0.22903
	498.372	0.153		0.150025	-0.13634	-0.380865	0.274193	-0.0378923		0.137854	-0.23084	-0.268732
	498.373	0.3275		0.151081	-0.135065	-0.371117	0.303207	-0.0937897		0.168142	-0.220036	-0.313826
	498.374	-0.15		0.152091	-0.133624	-0.360164	0.318858	-0.148018		0.185234	-0.208073	-0.356091
	498.375	0.360333		0.153057	-0.13202	-0.348054	0.319922	-0.191737		0.187902	-0.194997	-0.386735
	498.376	0.207		0.153977	-0.130255	-0.33484	0.305791	-0.216896		0.175535	-0.180863	-0.397759
	498.377	-0.119667		0.154851	-0.128333	-0.320577	0.276511	-0.217579		0.148178	-0.165726	-0.383306
	498.378	-0.0593333		0.155679	-0.126255	-0.305326	0.232795	-0.191109		0.10654	-0.149647	-0.340756
	498.379	-0.373		0.156461	-0.124025	-0.289151	0.176008	-0.138724		0.0519834	-0.132691	-0.271414
	498.38	-2.02233		0.157196	-0.121646	-0.272119	0.108118	-0.0656992		-0.013528	-0.114923	-0.180622
	498.381	-0.194667		0.157884	-0.119123	-0.254299	0.0316266	0.0191478		-0.0874964	-0.0964155	-0.0772678
	498.382	-0.0373333		0.158525	-0.116459	-0.235765	-0.0505301	0.10453		-0.166989	-0.07724	0.0272897
	498.383	0.018		0.159119	-0.113659	-0.216591	-0.135096	0.178207		-0.248755	-0.0574717	0.120735
	498.384	-0.0593333		0.159666	-0.110726	-0.196853	-0.21863	0.228745		-0.329356	-0.0371876	0.191558
	498.385	-0.218		0.160165	-0.107666	-0.176631	-0.297643	0.247268		-0.405309	-0.0164663	0.230802
	498.386	-0.463		0.160616	-0.104483	-0.156003	-0.368751	0.22892		-0.473234	0.00461237	0.233532
	498.387	-0.132		0.161019	-0.101183	-0.135051	-0.428814	0.173824		-0.529997	0.0259678	0.199792
	498.388	-0.526667		0.161374	-0.0977702	-0.113855	-0.475075	0.0873503		-0.572845	0.0475185	0.134869
	498.389	-0.697		0.16168	-0.0942507	-0.0924972	-0.505279	-0.0203785		-0.59953	0.0691831	0.0488046
	498.39	-0.842667		0.161938	-0.0906298	-0.0710585	-0.517783	-0.135701		-0.608413	0.09088	-0.0448212
	498.391	-0.352		0.162148	-0.0869134	-0.0496201	-0.511626	-0.243208		-0.598539	0.112528	-0.13068
	498.392	-0.530333		0.162309	-0.0831074	-0.028262	-0.486589	-0.327861		-0.569697	0.134047	-0.193814
	498.393	-1.25167		0.162422	-0.0792179	-0.00706361	-0.443215	-0.377154		-0.522433	0.155358	-0.221796
	498.394	-0.805		0.162485	-0.0752511	0.0138974	-0.382799	-0.382973		-0.45805	0.176383	-0.206591
	498.395	-0.083		0.1625	-0.0712133	0.0345448	-0.307351	-0.342909		-0.378564	0.197045	-0.145864
	498.396	-0.445		0.162466	-0.067111	0.0548043	-0.219526	-0.260771		-0.286637	0.21727	-0.0435008
	498.397	-0.151333		0.162382	-0.0629508	0.074604	-0.122526	-0.146239		-0.185476	0.236986	0.0907476
	498.398	0.389		0.16225	-0.0587393	0.0938742	-0.0199813	-0.0136646		-0.0787207	0.256125	0.24246
	498.399	2.17033		0.162069	-0.0544833	0.112548	0.0841884	0.11982		0.0297051	0.274617	0.394437
	498.4	1.702		0.161839	-0.0501896	0.130562	0.18593	0.236622		0.135741	0.292401	0.529023
	498.401	1.6415		0.16156	-0.045865	0.147855	0.281217	0.321113		0.235352	0.309414	0.630527
	498.402	1.122		0.161232	-0.0415164	0.164369	0.36621	0.361804		0.324693	0.325601	0.687405
	498.403	1.41733		0.160855	-0.0371509	0.180051	0.437417	0.35296		0.400266	0.340906	0.693866
	498.404	0.907		0.160429	-0.0327754	0.194851	0.491838	0.295421		0.459063	0.35528	0.650701
	498.405	1.50033		0.159954	-0.0283969	0.208722	0.527094	0.196498		0.498697	0.368676	0.565174
	498.406	1.77633		0.159431	-0.0240224	0.221622	0.541528	0.0689724		0.517506	0.381053	0.450026
	498.407	1.54967		0.158859	-0.0196588	0.233513	0.534287	-0.070664		0.514629	0.392372	0.321708
	498.408	1.61467		0.158238	-0.0153132	0.244361	0.505367	-0.204474		0.490054	0.4026	0.198126
	498.409	0.812333		0.157569	-0.0109926	0.254137	0.455621	-0.315511		0.444629	0.411706	0.0961946
	498.41	-0.065		0.156852	-0.00670366	0.262813	0.386744	-0.390085		0.38004	0.419665	0.0295801
	498.411	-0.071		0.156086	-0.00245339	0.270371	0.301209	-0.419533		0.298756	0.426457	0.00692392
	498.412	-0.757667		0.155273	0.0017515	0.276793	0.202185	-0.40126		0.203937	0.432066	0.0308056
	498.413	1.11		0.154412	0.0059043	0.282066	0.0934131	-0.33891		0.0993174	0.436478	0.0975675
	498.414	0.195		0.153503	0.00999842	0.286184	-0.0209353	-0.241683		-0.0109369	0.439686	0.198004
	498.415	0.849		0.152546	0.0140273	0.289142	-0.13642	-0.122898		-0.122393	0.441688	0.31879
	498.416	0.639		0.151542	0.0179847	0.290941	-0.248511	0.00194053		-0.230527	0.442484	0.444424
	498.417	0.488		0.150492	0.0218641	0.291587	-0.35277	0.117304		-0.330905	0.442079	0.559382
	498.418	-0.083		0.149394	0.0256596	0.291089	-0.445028	0.209694		-0.419369	0.440483	0.650177
	498.419	0.444		0.14825	0.0293651	0.28946	-0.521568	0.269315		-0.492202	0.43771	0.707025
	498.42	0.267667		0.147059	0.0329747	0.286718	-0.579269	0.291133		-0.546294	0.433777	0.72491
	498.421	0.0503333		0.145822	0.0364827	0.282883	-0.61575	0.275219		-0.579267	0.428706	0.703924
	498.422	0.0196667		0.14454	0.0398837	0.277982	-0.62947	0.226349		-0.589587	0.422521	0.64887
	498.423	0.049		0.143212	0.0431723	0.272042	-0.619802	0.152995		-0.576629	0.415253	0.568248
	498.424	-0.247		0.141839	0.0463433	0.265095	-0.587063	0.065868		-0.54072	0.406934	0.472802
	498.425	-0.339333		0.140421	0.0493918	0.257178	-0.532516	-0.0237211		-0.483125	0.397599	0.373878
	498.426	-2.917		0.138958	0.0523129	0.248329	-0.45832	-0.105434		-0.406007	0.387286	0.281852
	498.427	-2.01333		0.137451	0.0551023	0.238588	-0.367449	-0.17118		-0.312346	0.376039	0.204859
	498.428	-0.236		0.1359	0.0577554	0.228002	-0.263574	-0.215919		-0.205818	0.363902	0.147983
	498.429	0.1165		0.134306	0.0602683	0.216616	-0.150915	-0.237928		-0.0906471	0.350921	0.112993
	498.43	-0.065		0.132668	0.062637	0.204479	-0.0340684	-0.238531		0.0285686	0.337148	0.0986161
	498.431	-0.096		0.130988	0.0648579	0.191644	0.0821885	-0.221391		0.147046	0.322632	0.101241
	498.432	0.077		0.129265	0.0669276	0.178164	0.193093	-0.191538		0.260021	0.30743	0.115892
	498.433	0.247333		0.127501	0.068843	0.164094	0.294103	-0.154317		0.362946	0.291595	0.137278
	498.434	0.724667		0.125695	0.070601	0.149491	0.381087	-0.114461		0.451688	0.275185	0.160724
	498.435	-0.574667		0.123847	0.0721992	0.134412	0.450503	-0.0754376		0.522702	0.258259	0.182822
	498.436	0.422667		0.121959	0.0736351	0.118918	0.499553	-0.0391636		0.573188	0.240877	0.201714
	498.437	-0.356667		0.120031	0.0749066	0.103068	0.526302	-0.00611657		0.601209	0.223099	0.216983
	498.438	-0.008		0.118063	0.0760118	0.0869234	0.529767	0.024225		0.605779	0.204987	0.229212
	498.439	2.43		0.116056	0.0769492	0.0705452	0.509954	0.05273		0.586903	0.186601	0.239331
	498.44	1.99567		0.11401	0.0777174	0.0539951	0.467863	0.0799116		0.545581	0.168005	0.247916
	498.441	1.954		0.111925	0.0783154	0.0373344	0.405444	0.105342		0.483759	0.14926	0.254601
	498.442	1.759		0.109803	0.0787424	0.0206247	0.325508	0.127326		0.40425	0.130428	0.257754
	498.443	1.55		0.107643	0.078998	0.00392678	0.231608	0.142934		0.310606	0.11157	0.254504
	498.444	0.564		0.105447	0.0790818	-0.0126989	0.127879	0.148393		0.206961	0.0927481	0.241141
	498.445	-0.286		0.103214	0.078994	-0.029193	0.0188543	0.139812		0.0978483	0.0740215	0.213834
	498.446	-0.0296667		0.100946	0.0787349	-0.0454968	-0.0907322	0.114086		-0.0119973	0.0554493	0.169536
	498.447	-0.623		0.0986426	0.0783051	-0.0615531	-0.196158	0.0698265		-0.117853	0.0370895	0.106916
	498.448	0.230667		0.0963045	0.0777055	-0.0773061	-0.292921	0.00811776		-0.215215	0.0189984	0.0271162
	498.449	-0.009		0.0939324	0.0769372	-0.0927014	-0.376935	-0.0670665		-0.299997	0.00123097	-0.0658355
	498.45	-0.183333		0.0915269	0.0760016	-0.107687	-0.444711	-0.148918		-0.368709	-0.0161597	-0.165077
	498.451	-0.649333		0.0890885	0.0749003	-0.122211	-0.493508	-0.228363		-0.418608	-0.0331225	-0.261485
	498.452	-0.126		0.0866178	0.0736354	-0.136226	-0.52145	-0.295115		-0.447815	-0.0496082	-0.344723
	498.453	-0.817		0.0841155	0.072209	-0.149686	-0.527603	-0.339074		-0.455394	-0.06557	-0.404644
	498.454	-0.719		0.0815822	0.0706236	-0.162546	-0.512007	-0.35188		-0.441384	-0.0809635	-0.432843
	498.455	-1.13967		0.0790185	0.0688818	-0.174765	-0.475667	-0.328381		-0.406785	-0.0957466	-0.424128
	498.456	-1.69244		0.076425	0.0669866	-0.186305	-0.420496	-0.267769		-0.35351	-0.10988	-0.377649
	498.457	-1.11319		0.0738024	0.0649411	-0.19713	-0.349224	-0.174158		-0.284283	-0.123328	-0.297486
	498.458	-0.533926		0.0711513	0.0627488	-0.207207	-0.265259	-0.0564962		-0.20251	-0.136055	-0.192551
	498.459	0.0453333		0.0684724	0.0604133	-0.216505	-0.172528	0.0722681		-0.112115	-0.148033	-0.0757644
	498.46	0.624593		0.0657663	0.0579385	-0.224998	-0.0752967	0.196663		-0.0173582	-0.159232	0.0374317
	498.461	1.27467		0.0630338	0.0553283	-0.232662	0.0220366	0.300658		0.0773649	-0.169629	0.13103
	498.462	1.06967		0.0602754	0.0525872	-0.239477	0.115135	0.369842		0.167722	-0.179202	0.19064
	498.463	0.661667		0.0574919	0.0497195	-0.245426	0.199924	0.393515		0.249643	-0.187934	0.205582
	498.464	1.057		0.0546841	0.04673	-0.250493	0.272768	0.366377		0.319498	-0.195809	0.170567
	498.465	1.05967		0.0518524	0.0436234	-0.25467	0.330635	0.289541		0.374258	-0.202817	0.0867241
	498.466	0.361		0.0489978	0.0404048	-0.257948	0.371219	0.170705		0.411623	-0.20895	-0.0382447
	498.467	0.811		0.0461209	0.0370795	-0.260324	0.393035	0.0233955		0.430114	-0.214203	-0.190807
	498.468	0.397333		0.0432224	0.0336527	-0.261797	0.395474	-0.134626		0.429127	-0.218575	-0.3532
	498.469	-0.65		0.040303	0.0301299	-0.262371	0.378814	-0.283605		0.408944	-0.222068	-0.505673
	498.47	-0.6835		0.0373635	0.0265169	-0.262051	0.344186	-0.4044		0.370703	-0.224688	-0.629088
	498.471	-0.727		0.0344046	0.0228193	-0.260848	0.293515	-0.481067		0.316334	-0.226443	-0.707511
	498.472	-1.13367		0.0314271	0.0190432	-0.258774	0.229406	-0.503091		0.248449	-0.227347	-0.730438
	498.473	-1.348		0.0284316	0.0151944	-0.255845	0.155019	-0.466907		0.170213	-0.227413	-0.694321
	498.474	-1.38267		0.025419	0.0112791	-0.25208	0.0739078	-0.376505		0.0851869	-0.226661	-0.603167
	498.475	-1.945		0.02239	0.00730346	-0.247502	-0.010148	-0.243004		-0.00284458	-0.225112	-0.468116
	498.476	-0.404667		0.0193454	0.00327386	-0.242136	-0.0933228	-0.0832433		-0.0900489	-0.22279	-0.306033
	498.477	-0.936667		0.016286	-0.000803384	-0.236009	-0.171919	0.0824247		-0.172723	-0.219723	-0.137298
	498.478	-1.00933		0.0132124	-0.00492184	-0.229152	-0.242535	0.23284		-0.247457	-0.21594	0.0169007
	498.479	-0.861		0.0101255	-0.00907504	-0.221599	-0.302209	0.348866		-0.311284	-0.211473	0.137393
	498.48	-0.413		0.00702608	-0.0132565	-0.213385	-0.348548	0.415944		-0.361805	-0.206359	0.209585
	498.481	-0.712667		0.00391489	-0.0174595	-0.204548	-0.379819	0.426026		-0.397279	-0.200633	0.225392
	498.482	-0.638		0.000792728	-0.0216777	-0.195129	-0.395011	0.378602		-0.416688	-0.194336	0.184266
	498.483	-0.646		-0.00233962	-0.0259044	-0.185169	-0.393861	0.2807		-0.419765	-0.187508	0.0931914
	498.484	-1.791		-0.00548137	-0.030133	-0.174712	-0.376847	0.145844		-0.40698	-0.180194	-0.0343495
	498.485	-1.5655		-0.00863172	-0.034357	-0.163804	-0.345144	-0.00785343		-0.3795	-0.172436	-0.180289
	498.486	-0.715		-0.0117899	-0.0385697	-0.152492	-0.300549	-0.160204		-0.339119	-0.164282	-0.324486
	498.487	-0.670667		-0.014955	-0.0427647	-0.140824	-0.245386	-0.291693		-0.288151	-0.155779	-0.447472
	498.488	-0.354		-0.0181264	-0.0469355	-0.12885	-0.182378	-0.386079		-0.229314	-0.146976	-0.533056
	498.489	-0.870667		-0.0213032	-0.0510757	-0.116619	-0.114518	-0.43249		-0.165594	-0.137922	-0.570411
	498.49	-0.425		-0.0244846	-0.0551788	-0.104182	-0.0449217	-0.426716		-0.1001	-0.128666	-0.555382
	498.491	-0.759333		-0.0276697	-0.0592386	-0.0915902	0.0233162	-0.371564		-0.0359224	-0.11926	-0.490824
	498.492	-1.282		-0.0308579	-0.0632488	-0.0788958	0.0872586	-0.276226		0.0240098	-0.109754	-0.38598
	498.493	-0.755333		-0.0340482	-0.0672033	-0.0661499	0.144253	-0.154795		0.0770502	-0.100198	-0.254993
	498.494	-0.915		-0.0372399	-0.0710961	-0.0534039	0.192042	-0.0241589		0.120946	-0.0906438	-0.114803
	498.495	-1.508		-0.0404322	-0.0749212	-0.0407089	0.228847	0.0984048		0.153926	-0.0811411	0.0172637
	498.496	1.95833		-0.0436242	-0.0786728	-0.0281152	0.253431	0.197584		0.174758	-0.0717394	0.125845
	498.497	1.555		-0.0468152	-0.0823453	-0.0156725	0.265133	0.262005		0.182788	-0.0624877	0.199517
	498.498	1.1135		-0.0500043	-0.085933	-0.00342968	0.263878	0.28556		0.177945	-0.053434	0.232126
	498.499	-0.144		-0.0531907	-0.0894307	0.00856586	0.250152	0.267933		0.160722	-0.0446248	0.223308
	498.5	-0.913		-0.0563736	-0.0928329	0.0202678	0.224964	0.214285		0.132132	-0.0361058	0.178179
	498.501	-0.138		-0.0595523	-0.0961346	0.0316315	0.189777	0.13419		0.0936421	-0.0279207	0.106269
	498.502	-0.223333		-0.0627258	-0.0993308	0.0426139	0.146424	0.040024		0.047093	-0.0201119	0.0199122
	498.503	-0.147		-0.0658935	-0.102417	0.0531738	0.0970168	-0.0549395		-0.00540004	-0.0127196	-0.0676591
	498.504	-0.529		-0.0690544	-0.105388	0.063272	0.0438397	-0.138428		-0.0615485	-0.00578234	-0.144211
	498.505	-1.85967		-0.0722078	-0.10824	0.0728715	-0.010757	-0.200785		-0.118997	0.00066373	-0.200122
	498.506	-0.447		-0.0753529	-0.110969	0.0819375	-0.0644596	-0.236085		-0.175429	0.00658463	-0.2295
	498.507	-0.374		-0.0784888	-0.11357	0.0904376	-0.115089	-0.242622		-0.228659	0.0119488	-0.230673
	498.508	-0.07		-0.0816149	-0.11604	0.0983421	-0.160685	-0.222752		-0.276725	0.0167272	-0.206025
	498.509	-0.400333		-0.0847303	-0.118376	0.105624	-0.199581	-0.18215		-0.317956	0.0208935	-0.161256
	498.51	-0.767		-0.0878341	-0.120573	0.112258	-0.230456	-0.128654		-0.351029	0.0244238	-0.10423
	498.511	0.00633333		-0.0909257	-0.122628	0.118223	-0.252376	-0.0709035		-0.375004	0.0272973	-0.0436062
	498.512	-2.068		-0.0940042	-0.12454	0.1235	-0.264806	-0.0169924		-0.389346	0.029496	0.0125036
	498.513	0.275		-0.0970688	-0.126305	0.128073	-0.267619	0.0266479		-0.393924	0.0310047	0.0576525
	498.514	0.193		-0.100119	-0.12792	0.13193	-0.261072	0.0559892		-0.388991	0.0318111	0.0878003
	498.515	0.111		-0.103153	-0.129383	0.135059	-0.245776	0.069689		-0.375159	0.031906	0.101595
	498.516	-0.221		-0.106172	-0.130693	0.137455	-0.222655	0.0689145		-0.353348	0.0312833	0.100198
	498.517	-0.770667		-0.109173	-0.131847	0.139113	-0.192888	0.0567864		-0.324736	0.0299396	0.086726
	498.518	-0.205667		-0.112157	-0.132845	0.140032	-0.15785	0.0375716		-0.290695	0.0278747	0.0654464
	498.519	-0.524333		-0.115122	-0.133684	0.140214	-0.119047	0.0157893		-0.252731	0.0250914	0.0408807
	498.52	-0.392333		-0.118068	-0.134365	0.139663	-0.0780501	-0.00460986		-0.212415	0.0215951	0.0169853
	498.521	-0.253		-0.120994	-0.134885	0.138389	-0.0364371	-0.0208549		-0.171322	0.0173946	-0.00346028
	498.522	-0.316667		-0.1239	-0.135244	0.136401	0.00427002	-0.0316707		-0.130974	0.012501	-0.0191696
	498.523	-0.02		-0.126783	-0.135444	0.133712	0.0426534	-0.0372728		-0.0927901	0.00692857	-0.0303443
	498.524	-0.525667		-0.129645	-0.135482	0.130339	0.0774433	-0.0390736		-0.0580384	0.000693993	-0.0383796
	498.525	-0.087		-0.132484	-0.135359	0.126301	0.107552	-0.0391826		-0.0278076	-0.00618336	-0.045366
	498.526	-0.1585		-0.135299	-0.135077	0.121617	0.132098	-0.0398156		-0.00297919	-0.0136816	-0.0534972
	498.527	-0.497		-0.13809	-0.134635	0.116313	0.150423	-0.0427334		0.0157875	-0.0217766	-0.06451
	498.528	-0.847		-0.140855	-0.134035	0.110414	0.162097	-0.0488197		0.0280619	-0.0304419	-0.0792616
	498.529	-1.446		-0.143595	-0.133278	0.103947	0.16692	-0.0578719		0.033642	-0.0396487	-0.0975206
	498.53	-1.02067		-0.146309	-0.132365	0.0969423	0.164911	-0.0686349		0.0325459	-0.0493665	-0.118001
	498.531	-1.008		-0.148995	-0.131299	0.0894322	0.156297	-0.0790618		0.0249988	-0.0595629	-0.138625
	498.532	-1.55533		-0.151654	-0.13008	0.08145	0.141495	-0.0867413		0.0114152	-0.0702036	-0.156945
	498.533	-1.41867		-0.154284	-0.128711	0.0730307	0.121089	-0.089404		-0.00762193	-0.0812529	-0.170657
	498.534	-0.820333		-0.156884	-0.127195	0.0642108	0.09581	-0.0854091		-0.0313846	-0.0926735	-0.178083
	498.535	-1.367		-0.159455	-0.125533	0.0550282	0.0665091	-0.0741189		-0.0590243	-0.104427	-0.178546
	498.536	-1.565		-0.161996	-0.12373	0.0455217	0.0341328	-0.0560936		-0.0895975	-0.116474	-0.172568
	498.537	-1.03133		-0.164505	-0.121788	0.0357311	-0.000302733	-0.0330713		-0.122091	-0.128774	-0.161845
	498.538	-0.547		-0.166983	-0.11971	0.0256971	-0.0357368	-0.00773986		-0.155447	-0.141285	-0.149025
	498.539	-0.707667		-0.169428	-0.1175	0.0154609	-0.0710899	0.0166586		-0.18859	-0.153967	-0.137308
	498.54	-1.228		-0.17184	-0.115161	0.00506417	-0.105289	0.0368207		-0.22045	-0.166776	-0.129955
	498.541	-0.575		-0.174218	-0.112698	-0.00545119	-0.137292	0.0498893		-0.24999	-0.179669	-0.12978
	498.542	-0.442		-0.176563	-0.110113	-0.0160431	-0.166113	0.0538921		-0.276227	-0.192606	-0.138714
	498.543	-1.19633		-0.178872	-0.107413	-0.0266695	-0.190848	0.0480427		-0.298261	-0.205541	-0.157499
	498.544	-1.457		-0.181146	-0.1046	-0.0372885	-0.210695	0.0328613		-0.315295	-0.218435	-0.185573
	498.545	-1.11533		-0.183384	-0.10168	-0.0478588	-0.224981	0.0101007		-0.326661	-0.231243	-0.221142
	498.546	-1.20467		-0.185586	-0.0986574	-0.0583392	-0.233183	-0.0175034		-0.33184	-0.243925	-0.261428
	498.547	-1.29333		-0.18775	-0.0955368	-0.0686897	-0.234946	-0.0466141		-0.330482	-0.25644	-0.303054
	498.548	-0.975667		-0.189877	-0.0923235	-0.0788705	-0.230101	-0.0737462		-0.322424	-0.268747	-0.342493
	498.549	-1.09633		-0.191965	-0.0890225	-0.0888432	-0.218677	-0.0957228		-0.3077	-0.280808	-0.376531
	498.55	-1.575		-0.194015	-0.0856393	-0.0985704	-0.200912	-0.110072		-0.286551	-0.292585	-0.402657
	498.551	-0.798		-0.196026	-0.0821791	-0.108016	-0.177249	-0.115312		-0.259428	-0.304041	-0.419353
	498.552	-1.42567		-0.197997	-0.0786477	-0.117144	-0.148337	-0.111097		-0.226985	-0.315141	-0.426238
	498.553	-0.698		-0.199927	-0.0750506	-0.125923	-0.115019	-0.098213		-0.190069	-0.32585	-0.424063
	498.554	-1.4335		-0.201817	-0.0713935	-0.134319	-0.0783103	-0.0784298		-0.149704	-0.336136	-0.414565
	498.555	-1.141		-0.203666	-0.0676823	-0.142302	-0.0393745	-0.0542507		-0.107057	-0.345968	-0.400219
	498.556	-1.23333		-0.205473	-0.0639229	-0.149845	0.000511949	-0.0285836		-0.063411	-0.355318	-0.383901
	498.557	-0.861		-0.207238	-0.0601213	-0.15692	0.0399994	-0.00438797		-0.0201219	-0.364158	-0.368546
	498.558	-0.224		-0.20896	-0.0562834	-0.163502	0.0777104	0.0156647		0.021427	-0.372463	-0.356798
	498.559	-0.79		-0.21064	-0.0524154	-0.16957	0.112289	0.0294799		0.0598738	-0.380209	-0.350729
	498.56	-0.815333		-0.212276	-0.0485234	-0.175101	0.142453	0.0357499		0.0939297	-0.387377	-0.351627
	498.561	-0.0336667		-0.213868	-0.0446136	-0.180079	0.167043	0.0340699		0.122429	-0.393946	-0.359876
	498.562	-0.649		-0.215416	-0.0406921	-0.184485	0.185072	0.0249518		0.14438	-0.399901	-0.374949
	498.563	-0.357333		-0.216919	-0.036765	-0.188306	0.19577	0.0097404		0.159005	-0.405225	-0.395485
	498.564	-0.5		-0.218377	-0.0328387	-0.191531	0.198619	-0.00955732		0.165781	-0.409908	-0.419465
	498.565	-0.919667		-0.21979	-0.0289192	-0.194149	0.193383	-0.0305105		0.164464	-0.413939	-0.44445
	498.566	0.913		-0.221158	-0.0250128	-0.196152	0.180123	-0.0505472		0.15511	-0.41731	-0.467858
	498.567	0.191333		-0.222479	-0.0211256	-0.197537	0.159205	-0.0672533		0.138079	-0.420017	-0.48727
	498.568	-0.573		-0.223754	-0.0172636	-0.1983	0.131292	-0.0786559		0.114028	-0.422055	-0.50071
	498.569	-1.013		-0.224982	-0.013433	-0.198441	0.0973229	-0.083462		0.0838898	-0.423424	-0.506886
	498.57	-0.397		-0.226164	-0.00963976	-0.197961	0.0584848	-0.081222		0.048845	-0.424125	-0.505347
	498.571	-1.03233		-0.227298	-0.00588979	-0.196865	0.0161661	-0.072397		0.0102763	-0.424163	-0.49656
	498.572	-0.436		-0.228384	-0.00218897	-0.195159	-0.0280935	-0.0583137		-0.0302825	-0.423543	-0.481857
	498.573	-0.831333		-0.229423	0.00145691	-0.192851	-0.0726634	-0.0410081		-0.0712065	-0.422274	-0.463282
	498.574	-1.83167		-0.230414	0.00504215	-0.189952	-0.115886	-0.0229685		-0.110844	-0.420366	-0.443334
	498.575	-1.27433		-0.231356	0.00856115	-0.186475	-0.156144	-0.00680604		-0.147583	-0.417831	-0.424637
	498.576	-0.924333		-0.23225	0.0120084	-0.182435	-0.191925	0.00510695		-0.179917	-0.414685	-0.409578
	498.577	-1.03		-0.233095	0.0153786	-0.177848	-0.221883	0.0109832		-0.206504	-0.410943	-0.39996
	498.578	-1.08267		-0.233891	0.0186664	-0.172733	-0.244894	0.00989955		-0.226228	-0.406624	-0.396725
	498.579	-0.979		-0.234638	0.0218668	-0.167111	-0.260104	0.00196423		-0.238237	-0.401749	-0.399785
	498.58	-2.01733		-0.235336	0.0249748	-0.161004	-0.266958	-0.0116608		-0.241983	-0.39634	-0.408
	498.581	-1.343		-0.235984	0.0279854	-0.154436	-0.265227	-0.0288954		-0.237242	-0.39042	-0.419315
	498.582	-1.287		-0.236582	0.0308942	-0.147433	-0.255017	-0.047024		-0.224122	-0.384015	-0.431039
	498.583	-1.534		-0.237131	0.0336965	-0.140021	-0.236757	-0.0630927		-0.20306	-0.377152	-0.440245
	498.584	-1.29133		-0.23763	0.036388	-0.13223	-0.211187	-0.074364		-0.174799	-0.369859	-0.444223
	498.585	-1.28		-0.238078	0.0389646	-0.124088	-0.179321	-0.0787634		-0.140357	-0.362166	-0.44093
	498.586	-1.20233		-0.238477	0.0414223	-0.115627	-0.142407	-0.0752444		-0.100985	-0.354104	-0.429349
	498.587	-1.136		-0.238825	0.0437572	-0.106879	-0.101872	-0.0640097		-0.0581146	-0.345705	-0.409714
	498.588	-1.409		-0.239123	0.0459659	-0.0978769	-0.0592643	-0.0465431		-0.0132984	-0.337	-0.383543
	498.589	-0.485667		-0.239371	0.0480449	-0.0886538	-0.0161918	-0.0254364		0.0318531	-0.328025	-0.353461
	498.59	-0.452667		-0.239569	0.049991	-0.0792444	0.025744	-0.0040261		0.075735	-0.318813	-0.322839
	498.591	-0.909		-0.239715	0.0518012	-0.0696837	0.0650098	0.0141126		0.116811	-0.309399	-0.295286
	498.592	-1.51		-0.239812	0.0534729	-0.0600069	0.100198	0.02574		0.153671	-0.299819	-0.274079
	498.593	-0.833		-0.239858	0.0550033	-0.0502499	0.130082	0.028505		0.185085	-0.290108	-0.261603
	498.594	0.1815		-0.239853	0.0563903	-0.0404485	0.153652	0.0213853		0.210043	-0.280302	-0.258916
	498.595	0.491		-0.239798	0.0576317	-0.0306386	0.170159	0.00493587		0.227791	-0.270437	-0.265501
	498.596	-1.484		-0.239693	0.0587257	-0.020856	0.179127	-0.0187071		0.237852	-0.260549	-0.279256
	498.597	-0.485		-0.239537	0.0596706	-0.0111363	0.180369	-0.0460808		0.240039	-0.250673	-0.296754
	498.598	-0.736		-0.23933	0.0604651	-0.00151478	0.173985	-0.0728846		0.23445	-0.240845	-0.31373
	498.599	-1.354		-0.239074	0.061108	0.0079737	0.16035	-0.0946349		0.221458	-0.2311	-0.325735
	498.6	-0.712		-0.238767	0.0615983	0.017295	0.140093	-0.107392		0.201692	-0.221472	-0.328864
	498.601	-0.294		-0.23841	0.0619354	0.0264156	0.114066	-0.108438		0.176001	-0.211995	-0.320433
	498.602	-0.5675		-0.238003	0.062119	0.0353029	0.0833049	-0.0968073		0.145424	-0.202701	-0.299508
	498.603	-0.441		-0.237547	0.0621487	0.0439252	0.0489893	-0.0735488		0.111138	-0.193622	-0.26717
	498.604	-1.2115		-0.23704	0.0620246	0.0522518	0.012395	-0.0416907		0.0744196	-0.184788	-0.226479
	498.605	-1.3255		-0.236484	0.0617471	0.0602535	-0.0251532	-0.00587334		0.0365939	-0.176231	-0.182104
	498.606	-0.8295		-0.235878	0.0613166	0.0679019	-0.0623287	0.0283001		-0.0010121	-0.167976	-0.139676
	498.607	-0.4095		-0.235224	0.0607341	0.0751705	-0.0978487	0.0551088		-0.0371147	-0.160053	-0.104944
	498.608	-0.348		-0.234519	0.0600003	0.0820339	-0.130515	0.0696318		-0.0705151	-0.152486	-0.0828538
	498.609	-0.339		-0.233767	0.0591168	0.0884683	-0.159254	0.0685941		-0.100137	-0.145298	-0.0767041
	498.61	-0.797		-0.232965	0.0580848	0.0944519	-0.183142	0.0510009		-0.125057	-0.138513	-0.087512
	498.611	-0.356		-0.232115	0.0569063	0.0999642	-0.20144	0.0184468		-0.144533	-0.13215	-0.113704
	498.612	-0.025		-0.231216	0.055583	0.104987	-0.213603	-0.024969		-0.15802	-0.126229	-0.151198
	498.613	-0.148		-0.23027	0.0541173	0.109503	-0.219302	-0.0731304		-0.165184	-0.120767	-0.193897
	498.614	-1.188		-0.229275	0.0525115	0.113498	-0.218419	-0.118742		-0.165908	-0.115777	-0.23452
	498.615	-0.442		-0.228234	0.0507683	0.116959	-0.211056	-0.154404		-0.160288	-0.111274	-0.265678
	498.616	-0.602		-0.227144	0.0488906	0.119876	-0.197523	-0.173764		-0.148632	-0.107269	-0.281033
	498.617	-1.089		-0.226008	0.0468813	0.122239	-0.178324	-0.172579		-0.131443	-0.10377	-0.276349
	498.618	-0.0105		-0.224826	0.0447438	0.124042	-0.154146	-0.149506		-0.109402	-0.100784	-0.25029
	498.619	-0.1155		-0.223597	0.0424816	0.125281	-0.125829	-0.106486		-0.0833476	-0.0983162	-0.204802
	498.62	0.335		-0.222322	0.0400983	0.125952	-0.0943453	-0.048641		-0.0542469	-0.0963698	-0.145011
	498.621	-0.591		-0.221001	0.0375978	0.126056	-0.0607666	0.0163187		-0.0231688	-0.0949453	-0.0786266
	498.622	-0.416		-0.219635	0.0349842	0.125594	-0.0262337	0.0791269		0.00875055	-0.0940413	-0.0149144
	498.623	-0.562		-0.218224	0.0322617	0.124569	0.0080796	0.130279		0.0403413	-0.0936546	0.0366245
	498.624	-0.543		-0.216768	0.0294346	0.122989	0.0410016	0.161454		0.0704363	-0.0937798	0.0676747
	498.625	-0.306		-0.215269	0.0265077	0.120859	0.0713999	0.166828		0.0979075	-0.0944094	0.0724189
	498.626	-0.481		-0.213725	0.0234855	0.118191	0.0982169	0.144068		0.121702	-0.0955343	0.0485339
	498.627	-0.39		-0.212138	0.020373	0.114995	0.120506	0.0948495		0.140879	-0.0971432	-0.00229364
	498.628	-0.7145		-0.210508	0.0171751	0.111285	0.137462	0.0247921		0.154637	-0.099223	-0.0744309
	498.629	-0.4485		-0.208835	0.0138972	0.107076	0.148454	-0.0571949		0.162351	-0.101759	-0.158954
	498.63	-0.4995		-0.20712	0.0105443	0.102385	0.153046	-0.140083		0.163591	-0.104735	-0.244818
	498.631	-0.364		-0.205363	0.00712202	0.0972317	0.151022	-0.212251		0.158144	-0.108132	-0.320383
	498.632	-0.131		-0.203566	0.00363576	0.091635	0.142392	-0.263152		0.146028	-0.111931	-0.375082
	498.633	-0.5695		-0.201727	9.12e-05	0.0856171	0.127403	-0.284874		0.127495	-0.11611	-0.400984
	498.634	-0.803		-0.199848	-0.00350605	0.0792009	0.106535	-0.27336		0.103028	-0.120647	-0.394007
	498.635	-1.18		-0.197929	-0.00715012	0.0724108	0.0804858	-0.229098		0.0733357	-0.125518	-0.354616
	498.636	-1.507		-0.195971	-0.0108352	0.0652723	0.0501587	-0.157166		0.0393235	-0.130699	-0.287864
	498.637	-0.314		-0.193974	-0.0145553	0.0578122	0.0166281	-0.0666089		0.00207282	-0.136162	-0.202771
	498.638	0.19		-0.191939	-0.0183044	0.050058	-0.0188938	0.0307633		-0.0371982	-0.141881	-0.111117
	498.639	-0.9		-0.189866	-0.0220766	0.0420382	-0.0551001	0.122		-0.0771768	-0.147827	-0.025827
	498.64	-1.3275		-0.187755	-0.0258658	0.0337822	-0.0906375	0.194817		-0.116503	-0.153973	0.0408435
	498.641	0.7755		-0.185608	-0.0296658	0.0253197	-0.124157	0.239318		-0.153823	-0.160289	0.0790297
	498.642	1.258		-0.183425	-0.0334706	0.0166813	-0.15437	0.2494		-0.187841	-0.166744	0.0826562
	498.643	-0.8925		-0.181206	-0.0372741	0.00789779	-0.180096	0.223606		-0.21737	-0.173308	0.0502975
	498.644	-0.556		-0.178952	-0.0410701	-0.000999597	-0.200317	0.16533		-0.241387	-0.179952	-0.0146219
	498.645	-0.8305		-0.176664	-0.0448525	-0.00997951	-0.214219	0.0823281		-0.259072	-0.186643	-0.104315
	498.646	-1.262		-0.174342	-0.0486153	-0.0190105	-0.221232	-0.0143835		-0.269847	-0.193352	-0.207736
	498.647	-1.404		-0.171986	-0.0523524	-0.0280612	-0.221052	-0.112081		-0.273404	-0.200047	-0.312128
	498.648	-2.007		-0.169598	-0.0560577	-0.0371004	-0.213662	-0.198103		-0.26972	-0.206698	-0.404801
	498.649	-1.328		-0.167177	-0.0597254	-0.046097	-0.199338	-0.261589		-0.259063	-0.213274	-0.474863
	498.65	-2.053		-0.164726	-0.0633496	-0.0550205	-0.178634	-0.294926		-0.241984	-0.219746	-0.514673
	498.651	-1.622		-0.162243	-0.0669243	-0.0638407	-0.152368	-0.294711		-0.219293	-0.226084	-0.520795
	498.652	-1.541		-0.15973	-0.0704439	-0.0725279	-0.121587	-0.262096		-0.19203	-0.232258	-0.494354
	498.653	-1.0905		-0.157188	-0.0739026	-0.0810534	-0.0875208	-0.202482		-0.161423	-0.238241	-0.440724
	498.654	-1.029		-0.154616	-0.077295	-0.089389	-0.0515368	-0.12464		-0.128832	-0.244005	-0.368645
	498.655	-0.747		-0.152017	-0.0806156	-0.0975074	-0.0150758	-0.0393702		-0.0956914	-0.249524	-0.288894
	498.656	-0.093		-0.149389	-0.0838589	-0.105382	0.0204073	0.0420517		-0.0634516	-0.254772	-0.21272
	498.657	0.915		-0.146735	-0.0870199	-0.112988	0.0535069	0.109445		-0.033513	-0.259723	-0.150279
	498.658	-0.576		-0.144055	-0.0900933	-0.120301	0.0829273	0.155062		-0.00716601	-0.264356	-0.109293
	498.659	-0.64		-0.141349	-0.0930743	-0.127298	0.107538	0.17453		0.014464	-0.268647	-0.0941168
	498.66	0.565		-0.138618	-0.095958	-0.133957	0.126423	0.167255		0.030465	-0.272574	-0.105319
	498.661	-0.309		-0.135862	-0.0987398	-0.140257	0.138916	0.136287		0.0401758	-0.27612	-0.139833
	498.662	-0.965		-0.133084	-0.101415	-0.14618	0.144627	0.0876561		0.0432118	-0.279264	-0.191608
	498.663	-0.495		-0.130282	-0.10398	-0.151708	0.143458	0.0293358		0.0394784	-0.281989	-0.252654
	498.664	-0.336		-0.127458	-0.10643	-0.156823	0.135599	-0.0300222		0.0291696	-0.284281	-0.314304
	498.665	-0.214		-0.124613	-0.108761	-0.161513	0.121515	-0.0823699		0.0127547	-0.286125	-0.368495
	498.666	0.009		-0.121747	-0.110969	-0.165762	0.101921	-0.121378		-0.00904851	-0.287509	-0.408887
	498.667	-0.026		-0.118861	-0.113051	-0.16956	0.0777399	-0.143229		-0.0353113	-0.288421	-0.431649
	498.668	-0.04		-0.115956	-0.115004	-0.172896	0.0500638	-0.146985		-0.06494	-0.288852	-0.435837
	498.669	-0.5345		-0.113032	-0.116824	-0.175761	0.0200945	-0.134508		-0.0967291	-0.288794	-0.423302
	498.67	-0.699		-0.110091	-0.118508	-0.17815	-0.0109099	-0.10995		-0.129418	-0.28824	-0.398191
	498.671	-0.5735		-0.107132	-0.120053	-0.180055	-0.0416931	-0.0789356		-0.161747	-0.287187	-0.366123
	498.672	-0.839		-0.104157	-0.121458	-0.181474	-0.0710552	-0.0475558		-0.192513	-0.285631	-0.333187
	498.673	-3.818		-0.101167	-0.12272	-0.182405	-0.0979037	-0.0213507		-0.220623	-0.283571	-0.304922
	498.674	-0.751		-0.0981611	-0.123836	-0.182846	-0.121297	-0.00442993		-0.245132	-0.281007	-0.285437
	498.675	-0.824		-0.0951417	-0.124805	-0.182799	-0.140477	0.00113472		-0.265281	-0.277941	-0.276806
	498.676	-0.117		-0.0921088	-0.125625	-0.182266	-0.154896	-0.00444062		-0.28052	-0.274375	-0.278816
	498.677	-0.632		-0.0890634	-0.126295	-0.181252	-0.164227	-0.0187862		-0.290522	-0.270316	-0.289102
	498.678	-0.6135		-0.0860062	-0.126813	-0.179762	-0.168368	-0.0378672		-0.295181	-0.265768	-0.303636
	498.679	-0.3105		-0.0829379	-0.127179	-0.177804	-0.167431	-0.0567412		-0.294611	-0.260742	-0.317483
	498.68	-0.2985		-0.0798593	-0.127393	-0.175385	-0.161725	-0.0704607		-0.289118	-0.255245	-0.325705
	498.681	-0.8545		-0.0767711	-0.127453	-0.172517	-0.151728	-0.0749749		-0.279181	-0.249288	-0.324263
	498.682	-0.013		-0.0736741	-0.12736	-0.16921	-0.138055	-0.0678874		-0.265415	-0.242885	-0.310772
	498.683	-0.81		-0.0705692	-0.127113	-0.165478	-0.121424	-0.0489459		-0.248537	-0.236047	-0.284993
	498.684	-0.299		-0.067457	-0.126713	-0.161334	-0.102612	-0.0201853		-0.229325	-0.228791	-0.248977
	498.685	-0.693		-0.0643383	-0.126161	-0.156795	-0.0824196	0.0143074		-0.20858	-0.221133	-0.206825
	498.686	0.09		-0.0612139	-0.125457	-0.151875	-0.0616361	0.0489761		-0.187093	-0.213089	-0.164113
	498.687	-0.036		-0.0580846	-0.124602	-0.146594	-0.0410054	0.0776451		-0.165608	-0.204678	-0.127033
	498.688	0.11		-0.0549511	-0.123598	-0.140969	-0.0212003	0.0945093		-0.144798	-0.19592	-0.101411
	498.689	0.058		-0.0518142	-0.122446	-0.135021	-0.00280255	0.0951167		-0.125248	-0.186835	-0.0917187
	498.69	-0.591		-0.0486747	-0.121148	-0.128771	0.0137107	0.0771887		-0.107437	-0.177445	-0.100257
	498.691	-0.2825		-0.0455333	-0.119705	-0.122239	0.0279733	0.0411462		-0.091732	-0.167772	-0.126626
	498.692	-0.408		-0.0423909	-0.118121	-0.115449	0.0397301	-0.00975278		-0.0783909	-0.15784	-0.167592
	498.693	-0.851		-0.0392482	-0.116397	-0.108423	0.0488312	-0.0697041		-0.0675659	-0.147671	-0.217375
	498.694	-0.293		-0.0361059	-0.114536	-0.101186	0.0552223	-0.131051		-0.059314	-0.137292	-0.268342
	498.695	-0.6545		-0.0329649	-0.112541	-0.0937614	0.0589307	-0.185296		-0.0536108	-0.126726	-0.312022
	498.696	-1.7325		-0.0298258	-0.110416	-0.0861749	0.0600507	-0.224298		-0.050365	-0.116001	-0.340299
	498.697	0.231		-0.0266896	-0.108162	-0.0784517	0.0587275	-0.24148		-0.0494348	-0.105141	-0.346622
	498.698	-1.156		-0.0235569	-0.105785	-0.0706175	0.0551425	-0.232877		-0.0506421	-0.0941744	-0.327052
	498.699	-1.106		-0.0204285	-0.103287	-0.0626986	0.0495004	-0.197856		-0.0537861	-0.0831271	-0.280983
	498.7	-0.776		-0.0173051	-0.100672	-0.0547212	0.0420184	-0.13939		-0.0586534	-0.0720263	-0.211416
	498.701	0.061		-0.0141876	-0.0979444	-0.0467118	0.0329194	-0.0638368		-0.065025	-0.0608994	-0.124736
	498.702	-0.331		-0.0110767	-0.0951087	-0.0386968	0.022428	0.0197859		-0.0726807	-0.0497734	-0.0299876
	498.703	1.071		-0.0079731	-0.092169	-0.0307027	0.0107696	0.100927		-0.0813994	-0.0386758	0.0622512
	498.704	-0.0095		-0.00487762	-0.0891299	-0.0227558	-0.00182763	0.168893		-0.0909576	-0.0276335	0.14126
	498.705	-0.608		-0.00179098	-0.0859962	-0.0148824	-0.0151288	0.214313		-0.101125	-0.0166734	0.197639
	498.706	-0.0755		0.00128607	-0.0827727	-0.00710825	-0.0288875	0.230469		-0.11166	-0.00582219	0.224647
	498.707	0.601		0.00435276	-0.0794643	0.000541145	-0.0428409	0.214307		-0.122305	0.00489391	0.219201
	498.708	0.257		0.00740838	-0.0760763	0.00804073	-0.0567055	0.166963		-0.132782	0.0154491	0.182412
	498.709	-0.142		0.0104522	-0.0726139	0.015366	-0.070175	0.0937271		-0.142789	0.0258182	0.119545
	498.71	0.265		0.0134834	-0.0690825	0.022493	-0.0829211	0.00343937		-0.152004	0.0359764	0.0394158
	498.711	0.271		0.0165014	-0.0654876	0.0293985	-0.0945968	-0.0926265		-0.160084	0.0458999	-0.0467266
	498.712	0		0.0195053	-0.0618347	0.0360601	-0.104844	-0.18223		-0.166678	0.0555654	-0.126665
	498.713	-0.316		0.0224945	-0.0581296	0.0424562	-0.113303	-0.253791		-0.171432	0.0649507	-0.188841
	498.714	-1.06		0.0254682	-0.054378	0.048566	-0.119628	-0.297955		-0.174006	0.0740343	-0.22392
	498.715	-1.291		0.0284258	-0.0505858	0.05437	-0.123502	-0.308868		-0.174088	0.0827958	-0.226073
	498.716	-0.54		0.0313665	-0.0467588	0.0598494	-0.124657	-0.285002		-0.171416	0.0912159	-0.193786
	498.717	-0.5105		0.0342896	-0.0429029	0.0649868	-0.122888	-0.229382		-0.165791	0.0992763	-0.130106
	498.718	-0.603		0.0371944	-0.0390243	0.0697658	-0.118075	-0.149212		-0.157099	0.10696	-0.0422515
	498.719	-0.403		0.0400802	-0.0351289	0.0741715	-0.110198	-0.0549199		-0.145327	0.114252	0.0593318
	498.72	-0.7645		0.0429464	-0.0312228	0.0781902	-0.0993462	0.0412302		-0.130569	0.121137	0.162367
	498.721	0.389		0.0457922	-0.027312	0.0818094	-0.0857311	0.126782		-0.113043	0.127602	0.254384
	498.722	1.14		0.048617	-0.0234026	0.0850183	-0.0696856	0.190753		-0.0930882	0.133635	0.324389
	498.723	0.719		0.0514201	-0.0195008	0.0878075	-0.0516624	0.225097		-0.0711631	0.139228	0.364325
	498.724	-0.237		0.0542008	-0.0156125	0.090169	-0.0322238	0.225766		-0.0478363	0.14437	0.370135
	498.725	-0.211		0.0569585	-0.0117438	0.0920964	-0.0120267	0.193221		-0.0237705	0.149055	0.342276
	498.726	0.192		0.0596925	-0.00790074	0.093585	0.00820019	0.132334		0.000299449	0.153277	0.285611
	498.727	-0.214		0.0624022	-0.00408929	0.0946315	0.0276826	0.0516863		0.0235933	0.157034	0.20872
	498.728	0.322		0.0650869	-0.000315365	0.0952345	0.0456322	-0.0376276		0.0453168	0.160321	0.122694
	498.729	0.262		0.067746	0.00341518	0.095394	0.0612802	-0.12353		0.0646953	0.16314	0.0396103
	498.73	0.298		0.0703788	0.00709655	0.0951117	0.0739127	-0.194606		0.0810092	0.165491	-0.0291151
	498.731	0.32		0.0729849	0.010723	0.0943911	0.082905	-0.241648		0.093628	0.167376	-0.0742717
	498.732	-0.692		0.0755635	0.014289	0.0932372	0.0877541	-0.258878		0.102043	0.168801	-0.0900777
	498.733	0.123		0.078114	0.0177888	0.0916567	0.0881064	-0.244695		0.105895	0.169771	-0.074924
	498.734	1.279		0.0806358	0.0212172	0.0896579	0.0837808	-0.20183		0.104998	0.170294	-0.0315367
	498.735	0.243		0.0831284	0.0245687	0.0872507	0.0747843	-0.136922		0.099353	0.170379	0.0334566
	498.736	-0.03		0.0855911	0.0278382	0.0844466	0.0613194	-0.0595419		0.0891576	0.170038	0.110496
	498.737	0.031		0.0880235	0.0310206	0.0812586	0.0437833	0.0191703		0.0748039	0.169282	0.188452
	498.738	-0.189		0.0904248	0.0341109	0.0777013	0.0227582	0.0880745		0.056869	0.168126	0.256201
	498.739	0.505		0.0927947	0.0371043	0.0737905	-0.00100798	0.137591		0.0360963	0.166585	0.304176
	498.74	0.513		0.0951324	0.0399962	0.0695436	-0.0266279	0.161029		0.0133683	0.164676	0.325705
	498.741	0.223		0.0974375	0.0427822	0.0649791	-0.0531093	0.155508		-0.0103271	0.162417	0.317924
	498.742	0.263		0.0997095	0.0454578	0.060117	-0.0793945	0.122332		-0.0339367	0.159827	0.282159
	498.743	0.3445		0.101948	0.0480189	0.0549783	-0.104405	0.0667836		-0.0563857	0.156926	0.22371
	498.744	0.2795		0.104152	0.0504615	0.0495851	-0.127085	-0.00265585		-0.0766239	0.153737	0.151081
	498.745	0.305		0.106321	0.0527818	0.0439605	-0.146454	-0.0755301		-0.0936721	0.150282	0.0747517
	498.746	0.1445		0.108455	0.0549763	0.0381285	-0.161642	-0.140919		-0.106666	0.146584	0.00566506
	498.747	0.2385		0.110554	0.0570415	0.0321139	-0.171937	-0.189018		-0.114896	0.142668	-0.0463498
	498.748	0.332		0.112616	0.0589741	0.0259422	-0.176816	-0.212563		-0.117842	0.138558	-0.0740049
	498.749	-0.151		0.114642	0.0607712	0.0196395	-0.17597	-0.207903		-0.115199	0.134281	-0.0736221
	498.75	-0.108		0.11663	0.06243	0.0132323	-0.169325	-0.175552		-0.106895	0.129863	-0.0456888
	498.751	0.184		0.118581	0.0639478	0.00674759	-0.157045	-0.120147		-0.0930972	0.125329	0.0051818
	498.752	-0.241		0.120494	0.0653223	0.000212492	-0.139534	-0.049817		-0.0742112	0.120707	0.07089
	498.753	-0.082		0.122369	0.0665513	-0.00634569	-0.117416	0.0249766		-0.050865	0.116023	0.141
	498.754	0.7265		0.124205	0.067633	-0.0128997	-0.0915198	0.0929402		-0.0238868	0.111305	0.204245
	498.755	0.214		0.126001	0.0685655	-0.0194223	-0.0628376	0.143597		0.00572794	0.106579	0.250176
	498.756	-0.0535		0.127758	0.0693474	-0.0258866	-0.0324908	0.168838		0.0368566	0.101872	0.270709
	498.757	0.671		0.129475	0.0699775	-0.0322661	-0.00168179	0.164157		0.0682958	0.0972088	0.261366
	498.758	0.3295		0.131151	0.0704548	-0.0385346	0.0283562	0.129379		0.098811	0.0926166	0.221996
	498.759	0.7055		0.132787	0.0707784	-0.0446668	0.0564106	0.0687717		0.127189	0.08812	0.156892
	498.76	0.283		0.134381	0.0709478	-0.0506378	0.0813408	-0.00948717		0.152289	0.0837433	0.0742561
	498.761	0.286		0.135934	0.0709627	-0.0564238	0.102126	-0.0944196		0.173089	0.0795101	-0.0149095
	498.762	-0.433		0.137445	0.070823	-0.0620019	0.11791	-0.173784		0.188733	0.075443	-0.0983413
	498.763	0.348		0.138914	0.0705289	-0.0673501	0.128033	-0.235825		0.198562	0.0715636	-0.164262
	498.764	0.038		0.14034	0.0700808	-0.0724478	0.132067	-0.27098		0.202148	0.0678922	-0.203088
	498.765	0.33		0.141723	0.0694792	-0.0772755	0.129824	-0.273307		0.199304	0.064448	-0.208859
	498.766	0.057		0.143064	0.0687252	-0.0818151	0.121372	-0.241408		0.190097	0.0612488	-0.180159
	498.767	-0.084		0.144361	0.0678196	-0.0860499	0.107023	-0.178722		0.174843	0.0583109	-0.120411
	498.768	0.1175		0.145614	0.0667639	-0.0899648	0.0873276	-0.0931301		0.154091	0.0556493	-0.0374809
	498.769	0.0795		0.146823	0.0655597	-0.0935462	0.0630423	0.00408487		0.128602	0.0532771	0.057362
	498.77	0.001		0.147988	0.0642086	-0.0967823	0.0351028	0.0997682		0.0993114	0.0512061	0.150974
	498.771	0.3045		0.149109	0.0627127	-0.0996629	0.00458111	0.180712		0.0672938	0.0494463	0.230158
	498.772	0.7105		0.150185	0.0610742	-0.102179	-0.0273585	0.235498		0.0337157	0.0480057	0.283504
	498.773	1.724		0.151216	0.0592956	-0.104325	-0.059508	0.256111		-0.000212415	0.0468909	0.303002
	498.774	-0.146		0.152202	0.0573794	-0.106096	-0.0906646	0.239079		-0.0332852	0.0461066	0.285186
	498.775	-1.443		0.153143	0.0553286	-0.107488	-0.119679	0.185997		-0.0643501	0.0456553	0.231652
	498.776	-0.377		0.154038	0.0531461	-0.1085	-0.145498	0.103341		-0.0923519	0.0455383	0.14888
	498.777	0.029		0.154888	0.0508353	-0.109133	-0.167207	0.00161456		-0.116372	0.0457546	0.0473691
	498.778	-0.119		0.155691	0.0483996	-0.10939	-0.18406	-0.106066		-0.13566	0.0463015	-0.0597641
	498.779	-0.371		0.156449	0.0458426	-0.109274	-0.195503	-0.205731		-0.149661	0.0471746	-0.158556
	498.78	-0.7075		0.157161	0.0431681	-0.108793	-0.201194	-0.284434		-0.158026	0.0483677	-0.236066
	498.781	-1.6365		0.157826	0.0403801	-0.107953	-0.201004	-0.331968		-0.160624	0.0498727	-0.282096
	498.782	-0.5265		0.158445	0.0374829	-0.106765	-0.195018	-0.342206		-0.157536	0.0516802	-0.290525
	498.783	-1.516		0.159017	0.0344807	-0.105238	-0.183525	-0.313863		-0.149045	0.0537787	-0.260085
	498.784	0.224		0.159543	0.0313779	-0.103387	-0.166997	-0.250623		-0.135619	0.0561556	-0.194468
	498.785	0.075		0.160022	0.0281794	-0.101226	-0.146064	-0.160583		-0.117885	0.0587967	-0.101787
	498.786	0.394		0.160455	0.0248897	-0.0987684	-0.12149	-0.0551441		-0.0966007	0.0616861	0.00654207
	498.787	-0.474		0.16084	0.0215139	-0.0960329	-0.0941347	0.0525178		-0.0726208	0.0648072	0.117325
	498.788	1.432		0.161179	0.0180569	-0.0930371	-0.0649209	0.149165		-0.046864	0.0681416	0.217306
	498.789	0.661		0.161471	0.014524	-0.0898002	-0.0348025	0.223177		-0.0202784	0.0716703	0.294847
	498.79	0.617		0.161715	0.0109205	-0.0863423	-0.00472983	0.26597		0.00619064	0.0753731	0.341343
	498.791	-0.411		0.161913	0.0072516	-0.0826843	0.0243794	0.272985		0.031631	0.0792289	0.352214
	498.792	0.429		0.162064	0.00352292	-0.0788481	0.0516666	0.244124		0.0551896	0.083216	0.32734
	498.793	0.3995		0.162168	-0.000260009	-0.0748561	0.0763542	0.183623		0.0760942	0.087312	0.270935
	498.794	0.6605		0.162225	-0.00409154	-0.070731	0.0977627	0.0993777		0.0936712	0.0914941	0.190872
	498.795	0.414		0.162235	-0.00796594	-0.0664961	0.115323	0.00185731		0.107357	0.0957391	0.0975964
	498.796	0.2715		0.162198	-0.0118774	-0.0621749	0.128586	-0.0972506		0.116709	0.100023	0.00277291
	498.797	0.0325		0.162115	-0.0158202	-0.0577909	0.137224	-0.186477		0.121404	0.104324	-0.0821532
	498.798	-0.14		0.161984	-0.0197884	-0.0533676	0.141033	-0.25591		0.121245	0.108617	-0.147293
	498.799	-0.469		0.161807	-0.023776	-0.0489284	0.13993	-0.298279		0.116154	0.112879	-0.185401
	498.8	-0.414		0.161583	-0.0277771	-0.0444964	0.13395	-0.309673		0.106173	0.117087	-0.192586
	498.801	-0.087		0.161313	-0.0317857	-0.0400941	0.123237	-0.289828		0.0914516	0.121219	-0.168609
	498.802	-0.08		0.160997	-0.035796	-0.0357438	0.108045	-0.241987		0.072249	0.125253	-0.116734
	498.803	-0.418		0.160634	-0.0398018	-0.0314668	0.0887234	-0.172372		0.0489216	0.129167	-0.0432049
	498.804	-1.367		0.160224	-0.0437973	-0.0272839	0.0657167	-0.089355		0.0219194	0.13294	0.0435855
	498.805	1.581		0.159769	-0.0477764	-0.0232149	0.0395558	-0.00244799		-0.00822063	0.136554	0.134106
	498.806	0.244		0.159268	-0.0517333	-0.0192786	0.0108517	0.0787778		-0.0408817	0.13999	0.218767
	498.807	0.328		0.158721	-0.0556621	-0.0154927	-0.0197114	0.145713		-0.0753735	0.143229	0.288941
	498.808	1.372		0.158129	-0.0595569	-0.0118739	-0.0513841	0.191576		-0.110941	0.146255	0.337831
	498.809	-0.663		0.157491	-0.063412	-0.00843763	-0.0833619	0.212051		-0.146774	0.149054	0.361105
	498.81	-0.11		0.156809	-0.0672215	-0.00519791	-0.114797	0.205635		-0.182018	0.151611	0.357246
	498.811	-0.29		0.156081	-0.0709799	-0.0021675	-0.144813	0.173703		-0.215793	0.153913	0.327617
	498.812	0.696		0.155308	-0.0746816	0.000642276	-0.172522	0.120273		-0.247203	0.15595	0.276223
	498.813	0.408		0.154491	-0.078321	0.00322152	-0.197047	0.0515266		-0.275368	0.157712	0.209239
	498.814	0.517		0.15363	-0.0818927	0.00556183	-0.217546	-0.0248671		-0.299439	0.159191	0.134324
	498.815	0.456		0.152724	-0.0853916	0.00765628	-0.233237	-0.100561		-0.318629	0.16038	0.0598197
	498.816	0.34		0.151775	-0.0888123	0.00949948	-0.243429	-0.16739		-0.332241	0.161274	-0.00611541
	498.817	0.0635		0.150782	-0.0921498	0.0110875	-0.24755	-0.218211		-0.3397	0.161869	-0.0563415
	498.818	-0.0645		0.149746	-0.0953991	0.012418	-0.245179	-0.247638		-0.340579	0.162164	-0.0854742
	498.819	0.111		0.148667	-0.0985555	0.01349	-0.236072	-0.252606		-0.334627	0.162157	-0.090449
	498.82	0.1425		0.147545	-0.101614	0.014304	-0.220185	-0.232706		-0.321799	0.161849	-0.0708571
	498.821	-0.1625		0.146381	-0.104571	0.0148619	-0.197697	-0.190256		-0.302268	0.161243	-0.0290134
	498.822	-1.982		0.145175	-0.107421	0.0151672	-0.169018	-0.130082		-0.276439	0.160342	0.0302598
	498.823	1.6685		0.143927	-0.11016	0.0152242	-0.134796	-0.0590285		-0.244957	0.159151	0.100123
	498.824	-1.452		0.142638	-0.112785	0.0150391	-0.0959115	0.014766		-0.208696	0.157677	0.172443
	498.825	0.873		0.141308	-0.115291	0.0146186	-0.0534587	0.0827591		-0.16875	0.155926	0.238685
	498.826	1.043		0.139937	-0.117674	0.0139711	-0.00872384	0.136973		-0.126398	0.153908	0.290881
	498.827	0.372		0.138526	-0.119932	0.0131055	0.0368536	0.170933		-0.0830785	0.151631	0.322564
	498.828	0.57		0.137074	-0.122061	0.0120321	0.0817258	0.180465		-0.0403349	0.149107	0.329572
	498.829	0.434		0.135584	-0.124057	0.0107617	0.12429	0.16425		0.000233288	0.146345	0.310596
	498.83	0.545		0.134054	-0.125918	0.00930599	0.16295	0.124059		0.037032	0.14336	0.267419
	498.831	0.026		0.132485	-0.127641	0.00767724	0.196177	0.0646174		0.0685358	0.140162	0.20478
	498.832	-0.106		0.130878	-0.129224	0.00588829	0.222577	-0.00689577		0.0933534	0.136766	0.129871
	498.833	1.4915		0.129233	-0.130663	0.00395241	0.240953	-0.0816773		0.11029	0.133186	0.0515083
	498.834	1.098		0.127551	-0.131958	0.00188323	0.250364	-0.150361		0.118406	0.129434	-0.0209269
	498.835	0.1805		0.125831	-0.133106	-0.00030543	0.250174	-0.204188		0.117067	0.125526	-0.0786625
	498.836	-0.784		0.124075	-0.134106	-0.0025996	0.24009	-0.236143		0.105984	0.121475	-0.114667
	498.837	-0.423		0.122283	-0.134956	-0.00498529	0.220195	-0.241894		0.0852395	0.117298	-0.124597
	498.838	0.621		0.120455	-0.135655	-0.00744856	0.190953	-0.220425		0.0552987	0.113006	-0.107419
	498.839	0.194		0.118592	-0.136201	-0.00997567	0.153208	-0.17424		0.0170065	0.108616	-0.0656242
	498.84	0.515		0.116694	-0.136595	-0.0125531	0.108161	-0.109116		-0.0284344	0.10414	-0.00497555
	498.841	0.181		0.114761	-0.136835	-0.0151677	0.0573341	-0.0334117		-0.0795013	0.0995937	0.066182
	498.842	-0.154		0.112795	-0.136922	-0.0178067	0.00251838	0.0429891		-0.134404	0.0949886	0.137978
	498.843	-0.5215		0.110796	-0.136855	-0.0204578	-0.0542952	0.109965		-0.19115	0.0903382	0.200303
	498.844	-0.738		0.108764	-0.136634	-0.0231094	-0.110991	0.158511		-0.247625	0.0856546	0.244166
	498.845	-0.68		0.1067	-0.13626	-0.0257504	-0.165414	0.181969		-0.301675	0.0809493	0.262918
	498.846	-0.622		0.104604	-0.135734	-0.0283704	-0.21546	0.176969		-0.351193	0.0762333	0.253202
	498.847	-0.5645		0.102477	-0.135055	-0.0309597	-0.259161	0.143943		-0.394216	0.0715168	0.21546
	498.848	-0.5775		0.100319	-0.134226	-0.0335094	-0.294776	0.0871181		-0.429002	0.0668093	0.153927
	498.849	-0.774		0.0981308	-0.133247	-0.0360114	-0.320865	0.0139966		-0.454112	0.0621194	0.076116
	498.85	-0.952		0.0959133	-0.132121	-0.0384583	-0.336353	-0.0656321		-0.468473	0.057455	-0.00817711
	498.851	-1.13		0.0936668	-0.130848	-0.0408437	-0.340585	-0.14101		-0.471432	0.0528231	-0.0881868
	498.852	-1.247		0.0913919	-0.129431	-0.043162	-0.333356	-0.201883		-0.462786	0.04823	-0.153653
	498.853	-1.273		0.0890892	-0.127871	-0.0454082	-0.314927	-0.239921		-0.442798	0.043681	-0.19624
	498.854	-1.3		0.0867592	-0.126172	-0.0475785	-0.286017	-0.249889		-0.412189	0.0391807	-0.210708
	498.855	-1.3285		0.0844025	-0.124335	-0.0496695	-0.247779	-0.230392		-0.372115	0.034733	-0.195659
	498.856	-1.152		0.0820198	-0.122364	-0.051679	-0.201751	-0.184086		-0.324116	0.0303408	-0.153745
	498.857	-0.773		0.0796115	-0.120262	-0.053605	-0.149795	-0.117325		-0.270057	0.0260065	-0.0913188
	498.858	-0.394		0.0771784	-0.118031	-0.0554468	-0.0940156	-0.0392804		-0.212047	0.0217315	-0.0175489
	498.859	-0.015		0.0747209	-0.115675	-0.057204	-0.0366751	0.0393435		-0.15235	0.017517	0.0568604
	498.86	0.6445		0.0722398	-0.113198	-0.0588768	0.0199079	0.107807		-0.0932901	0.0133631	0.12117
	498.861	0.335		0.0697357	-0.110603	-0.060466	0.0734571	0.156845		-0.0371458	0.00926961	0.166114
	498.862	-0.356		0.0672091	-0.107894	-0.0619732	0.121837	0.179953		0.0139434	0.00523591	0.185189
	498.863	-0.357		0.0646607	-0.105075	-0.0633999	0.163147	0.17429		0.0580721	0.00126083	0.175551
	498.864	1.148		0.0620911	-0.102151	-0.0647483	0.195802	0.141036		0.093651	-0.00265713	0.138378
	498.865	0.674		0.0595011	-0.0991252	-0.0660208	0.2186	0.0851821		0.119475	-0.00651974	0.0786624
	498.866	0.838		0.0568911	-0.0960029	-0.0672201	0.230778	0.0147741		0.134775	-0.010329	0.00444508
	498.867	0.941		0.0542619	-0.0927885	-0.068349	0.232037	-0.0602775		0.139248	-0.0140871	-0.0743646
	498.868	0.865		0.0516142	-0.0894868	-0.0694103	0.222555	-0.129632		0.133068	-0.0177962	-0.147428
	498.869	0.9605		0.0489485	-0.0861028	-0.070407	0.202977	-0.183994		0.116874	-0.0214585	-0.205453
	498.87	0.277		0.0462655	-0.0826414	-0.0713418	0.17438	-0.216404		0.0917389	-0.0250763	-0.24148
	498.871	0.2865		0.043566	-0.0791079	-0.0722174	0.138222	-0.223167		0.0591145	-0.0286515	-0.251818
	498.872	0.1435		0.0408505	-0.0755075	-0.0730364	0.0962724	-0.204276		0.0207649	-0.0321859	-0.236462
	498.873	0.389		0.0381197	-0.0718455	-0.073801	0.0505274	-0.163297		-0.0213181	-0.0356813	-0.198978
	498.874	0.331		0.0353744	-0.0681273	-0.0745131	0.00311916	-0.106726		-0.0650082	-0.0391387	-0.145865
	498.875	-0.113		0.0326151	-0.0643586	-0.0751743	-0.0437849	-0.0429494		-0.108143	-0.0425592	-0.0855085
	498.876	2.068		0.0298427	-0.0605448	-0.0757857	-0.0880815	0.0190413		-0.148626	-0.0459431	-0.0269017
	498.877	0.729		0.0270576	-0.0566916	-0.0763481	-0.127828	0.0709646		-0.184519	-0.0492904	0.0216742
	498.878	0.854		0.0242607	-0.0528047	-0.0768615	-0.16133	0.106404		-0.214135	-0.0526008	0.0538037
	498.879	0.837		0.0214526	-0.0488899	-0.0773258	-0.187218	0.121632		-0.236108	-0.0558731	0.0657593
	498.88	0.946		0.0186341	-0.0449529	-0.0777399	-0.204507	0.115987		-0.24946	-0.0591058	0.0568813
	498.881	0.173		0.0158057	-0.0409996	-0.0781024	-0.212637	0.0917741		-0.253636	-0.0622967	0.0294774
	498.882	0.323		0.0129683	-0.0370358	-0.0784114	-0.211496	0.0537258		-0.248532	-0.0654431	-0.0117173
	498.883	0.312		0.0101224	-0.0330674	-0.0786641	-0.201419	0.0081289		-0.234487	-0.0685417	-0.0604128
	498.884	-0.245		0.00726889	-0.0291002	-0.0788574	-0.183165	-0.0382246		-0.212265	-0.0715885	-0.109813
	498.885	-0.207		0.00440833	-0.02514	-0.0789876	-0.157876	-0.0790866		-0.183016	-0.0745793	-0.153666
	498.886	0.122		0.00154148	-0.0211926	-0.0790503	-0.12702	-0.109636		-0.148213	-0.0775088	-0.187145
	498.887	-0.051		-0.00133098	-0.0172639	-0.0790406	-0.0923111	-0.127063		-0.109575	-0.0803716	-0.207435
	498.888	-0.349		-0.00420833	-0.0133597	-0.0789534	-0.0556286	-0.130784		-0.0689883	-0.0831617	-0.213946
	498.889	-0.992		-0.00708987	-0.00948561	-0.0787828	-0.0189201	-0.122276		-0.0284058	-0.0858727	-0.208148
	498.89	1.757		-0.0099749	-0.00564737	-0.0785227	0.0158926	-0.104589		0.0102453	-0.0884976	-0.193086
	498.891	0.291		-0.0128627	-0.00185057	-0.0781666	0.0470089	-0.0816489		0.0451583	-0.0910293	-0.172678
	498.892	0.535		-0.0157526	0.00189921	-0.0777076	0.0728361	-0.0574862		0.0747353	-0.0934602	-0.150946
	498.893	0.381		-0.0186439	0.00559652	-0.0771388	0.0920667	-0.035532		0.0976632	-0.0957827	-0.131315
	498.894	0.7515		-0.0215358	0.00923595	-0.076453	0.103741	-0.0181106		0.112977	-0.0979888	-0.116099
	498.895	-0.409		-0.0244277	0.0128122	-0.0756429	0.107293	-0.00619967		0.120105	-0.100071	-0.10627
	498.896	-1.0965		-0.0273188	0.0163201	-0.0747013	0.102574	0.000514248		0.118894	-0.10202	-0.101506
	498.897	-0.5125		-0.0302085	0.0197545	-0.073621	0.0898604	0.00332148		0.109615	-0.103829	-0.100508
	498.898	-0.296		-0.033096	0.0231104	-0.0723949	0.0698371	0.00399821		0.0929476	-0.105491	-0.101493
	498.899	-0.0225		-0.0359807	0.0263831	-0.0710163	0.0435615	0.00425377		0.0699446	-0.106997	-0.102743
	498.9	0.708		-0.0388618	0.0295677	-0.0694787	0.0124101	0.00523872		0.0419778	-0.10834	-0.103102
	498.901	-0.158		-0.0417386	0.0326597	-0.0677759	-0.0219907	0.00722046		0.010669	-0.109515	-0.102294
	498.902	0.556		-0.0446105	0.0356546	-0.0659025	-0.0578454	0.00949569		-0.0221908	-0.110513	-0.101017
	498.903	-0.339		-0.0474767	0.0385482	-0.0638534	-0.0932792	0.0105591		-0.054731	-0.11133	-0.100771
	498.904	0.241		-0.0503366	0.0413362	-0.0616243	-0.126431	0.00849289		-0.0850944	-0.111961	-0.103468
	498.905	-0.354		-0.0531894	0.0440147	-0.0592116	-0.155543	0.00149444		-0.111529	-0.112401	-0.110907
	498.906	-1.6635		-0.0560344	0.04658	-0.0566125	-0.179053	-0.0115717		-0.132473	-0.112647	-0.124219
	498.907	-0.5385		-0.058871	0.0490282	-0.0538251	-0.195665	-0.0307208		-0.146637	-0.112696	-0.143417
	498.908	-0.1725		-0.0616985	0.0513561	-0.0508485	-0.204417	-0.0546006		-0.153061	-0.112547	-0.167148
	498.909	-0.5225		-0.0645162	0.0535603	-0.0476827	-0.204727	-0.0805209		-0.151166	-0.112199	-0.19272
	498.91	-0.448		-0.0673233	0.0556378	-0.0443289	-0.196423	-0.104775		-0.140785	-0.111652	-0.216428
	498.911	0.591		-0.0701193	0.0575856	-0.0407894	-0.179751	-0.123216		-0.122166	-0.110909	-0.234125
	498.912	0.464		-0.0729034	0.059401	-0.0370676	-0.155367	-0.131985		-0.0959655	-0.109971	-0.241956
	498.913	1.697		-0.075675	0.0610816	-0.0331683	-0.124299	-0.128276		-0.0632175	-0.108843	-0.237119
	498.914	-0.17		-0.0784334	0.0626251	-0.0290974	-0.0879078	-0.110973		-0.0252827	-0.107531	-0.218504
	498.915	-3.111		-0.0811779	0.0640294	-0.0248621	-0.0478151	-0.0810521		0.0162143	-0.10604	-0.187092
	498.916	0.957		-0.0839078	0.0652926	-0.0204708	-0.00583049	-0.0416281		0.0594621	-0.104379	-0.146007
	498.917	0.481		-0.0866226	0.0664131	-0.0159333	0.036135	0.00236197		0.102548	-0.102556	-0.100194
	498.918	0.902		-0.0893215	0.0673894	-0.0112608	0.0761584	0.0448258		0.143548	-0.100582	-0.0557565
	498.919	0.6465		-0.0920039	0.0682203	-0.00646555	0.112395	0.0794291		0.180616	-0.0984694	-0.0190404
	498.92	1.744		-0.0946691	0.0689048	-0.0015612	0.143166	0.100611		0.212071	-0.0962303	0.00438103
	498.921	1.6015		-0.0973165	0.0694421	0.0034374	0.167031	0.104535		0.236473	-0.0938791	0.0106554
	498.922	0.4485		-0.0999455	0.0698317	0.0085142	0.182861	0.0897964		0.252693	-0.0914313	-0.00163487
	498.923	0.415		-0.102555	0.0700733	0.013652	0.189884	0.057776		0.259957	-0.0889034	-0.0311274
	498.924	0.9205		-0.105146	0.0701666	0.0188325	0.187721	0.0125369		0.257888	-0.086313	-0.0737761
	498.925	1.553		-0.107715	0.0701119	0.0240363	0.176403	-0.0397124		0.246515	-0.083679	-0.123391
	498.926	1.325		-0.110264	0.0699095	0.0292432	0.156365	-0.0915279		0.226274	-0.081021	-0.172549
	498.927	0.365		-0.112792	0.0695598	0.034432	0.128424	-0.135366		0.197984	-0.0783596	-0.213726
	498.928	-0.254		-0.115297	0.0690638	0.0395806	0.0937427	-0.164766		0.162806	-0.075716	-0.240482
	498.929	-0.495		-0.117779	0.0684223	0.0446664	0.0537704	-0.17538		0.122193	-0.0731125	-0.248492
	498.93	0.177		-0.120238	0.0676366	0.0496661	0.0101793	-0.165682		0.0778159	-0.0705717	-0.236253
	498.931	0.4385		-0.122673	0.0667081	0.054556	-0.0352131	-0.137227		0.0314949	-0.0681169	-0.205344
	498.932	-0.253		-0.125083	0.0656384	0.0593117	-0.0805258	-0.0944194		-0.0148874	-0.0657714	-0.160191
	498.933	-0.213		-0.127468	0.0644294	0.063909	-0.123897	-0.0438145		-0.0594677	-0.0635594	-0.107374
	498.934	-0.328		-0.129828	0.0630831	0.0683233	-0.163566	0.00692385		-0.100483	-0.0615046	-0.0545808
	498.935	0.0605		-0.132161	0.0616018	0.0725299	-0.197946	0.050245		-0.136344	-0.0596312	-0.00938618
	498.936	0.067		-0.134467	0.059988	0.0765044	-0.225692	0.0799068		-0.165704	-0.0579631	0.0219438
	498.937	0.2325		-0.136746	0.0582442	0.0802226	-0.245755	0.0919464		-0.18751	-0.0565238	0.0354226
	498.938	0.189		-0.138997	0.0563733	0.0836606	-0.257417	0.0852669		-0.201043	-0.0553367	0.0299303
	498.939	0.551		-0.14122	0.0543784	0.0867953	-0.260319	0.0617439		-0.205941	-0.0544245	0.00731934
	498.94	0.371		-0.143413	0.0522626	0.0896038	-0.254468	0.0258399		-0.202205	-0.0538094	-0.0279695
	498.941	-0.267		-0.145577	0.0500293	0.0920645	-0.240225	-0.016201		-0.190196	-0.0535126	-0.0697136
	498.942	-1.208		-0.147711	0.0476822	0.0941564	-0.218286	-0.0574373		-0.170603	-0.0535544	-0.110992
	498.943	-0.127		-0.149814	0.0452248	0.0958597	-0.189638	-0.0914019		-0.144414	-0.0539544	-0.145356
	498.944	-0.158		-0.151886	0.042661	0.0971557	-0.155517	-0.113161		-0.112856	-0.0547304	-0.167892
	498.945	-0.266		-0.153927	0.039995	0.0980272	-0.117345	-0.120081		-0.0773497	-0.0558994	-0.175981
	498.946	-0.466		-0.155935	0.0372308	0.0984583	-0.0766649	-0.112175		-0.0394341	-0.0574767	-0.169651
	498.947	-0.3935		-0.157911	0.0343728	0.0984348	-0.0350791	-0.0919766		-0.00070632	-0.059476	-0.151453
	498.948	0.378		-0.159854	0.0314255	0.0979441	0.00582223	-0.063989		0.0372477	-0.0619096	-0.125899
	498.949	0.895		-0.161763	0.0283933	0.0969753	0.044523	-0.0337917		0.0729163	-0.0647876	-0.0985792
	498.95	1.077		-0.163638	0.025281	0.0955197	0.0796391	-0.0069955		0.10492	-0.0681185	-0.075114
	498.951	0.507		-0.165479	0.0220934	0.0935703	0.109968	0.0117752		0.132061	-0.0719089	-0.0601336
	498.952	-0.007		-0.167285	0.0188354	0.0911222	0.134529	0.019688		0.153365	-0.076163	-0.0564749
	498.953	0.979		-0.169056	0.015512	0.0881729	0.152593	0.0161527		0.168105	-0.0808831	-0.0647304
	498.954	-0.242		-0.170791	0.0121283	0.0847217	0.163696	0.00284305		0.175824	-0.0860693	-0.0832263
	498.955	0.263		-0.17249	0.00868949	0.0807705	0.167649	-0.0167061		0.176339	-0.0917194	-0.108426
	498.956	0.352		-0.174152	0.00520074	0.0763235	0.164531	-0.0378441		0.169732	-0.0978289	-0.135673
	498.957	0.1395		-0.175778	0.0016674	0.0713869	0.154669	-0.0557483		0.156337	-0.104391	-0.160139
	498.958	0.041		-0.177366	-0.00190519	0.0659697	0.138619	-0.0663859		0.136714	-0.111396	-0.177782
	498.959	0.004		-0.178917	-0.0055116	0.0600829	0.117129	-0.0673152		0.111617	-0.118834	-0.186149
	498.96	-0.2215		-0.180429	-0.00914639	0.0537402	0.0911014	-0.0581729		0.081955	-0.126689	-0.184862
	498.961	0.2065		-0.181903	-0.0128041	0.0469575	0.0615568	-0.0407588		0.0487527	-0.134946	-0.175704
	498.962	0.183		-0.183338	-0.0164792	0.0397529	0.0295866	-0.0187002		0.0131074	-0.143586	-0.162286
	498.963	0.222		-0.184735	-0.0201662	0.0321469	-0.00368617	0.00324183		-0.0238523	-0.152588	-0.149346
	498.964	0.517		-0.186091	-0.0238595	0.0241624	-0.0371467	0.0200967		-0.0610062	-0.161929	-0.141832
	498.965	0.022		-0.187408	-0.0275537	0.0158242	-0.0697244	0.0276663		-0.0972781	-0.171584	-0.143918
	498.966	0.678		-0.188685	-0.0312433	0.00715944	-0.100424	0.0233833		-0.131667	-0.181526	-0.158143
	498.967	0.198		-0.189922	-0.0349228	-0.00180298	-0.128351	0.00688171		-0.163274	-0.191725	-0.184843
	498.968	0.21		-0.191118	-0.0385866	-0.0110321	-0.152732	-0.0198295		-0.191319	-0.20215	-0.221979
	498.969	-0.0585		-0.192273	-0.0422295	-0.0204951	-0.172931	-0.0526305		-0.21516	-0.212768	-0.265399
	498.97	0.1135		-0.193387	-0.045846	-0.0301577	-0.188453	-0.0859529		-0.234299	-0.223544	-0.309497
	498.971	0.2845		-0.194459	-0.0494308	-0.0399839	-0.198953	-0.11373		-0.248384	-0.234443	-0.348173
	498.972	-0.345		-0.19549	-0.0529786	-0.0499364	-0.204233	-0.130471		-0.257211	-0.245426	-0.375897
	498.973	-0.0485		-0.196479	-0.0564843	-0.0599766	-0.204238	-0.132266		-0.260722	-0.256455	-0.388721
	498.974	0.0265		-0.197425	-0.0599428	-0.0700649	-0.199049	-0.117555		-0.258992	-0.26749	-0.385045
	498.975	-0.4555		-0.198329	-0.063349	-0.0801608	-0.188876	-0.0875065		-0.252225	-0.27849	-0.365997
	498.976	-0.142		-0.199191	-0.066698	-0.0902228	-0.174043	-0.0459424		-0.240741	-0.289414	-0.335356
	498.977	0.404		-0.20001	-0.0699849	-0.100209	-0.154981	0.0011918		-0.224966	-0.300219	-0.299027
	498.978	0.232		-0.200785	-0.0732051	-0.110078	-0.132217	0.0467289		-0.205423	-0.310864	-0.264135
	498.979	1.107		-0.201518	-0.0763539	-0.119787	-0.106361	0.0834107		-0.182715	-0.321305	-0.237894
	498.98	1.003		-0.202207	-0.0794268	-0.129293	-0.0780928	0.105062		-0.15752	-0.3315	-0.226439
	498.981	-0.269		-0.202853	-0.0824195	-0.138555	-0.048153	0.107614		-0.130572	-0.341408	-0.233794
	498.982	-0.305		-0.203456	-0.0853277	-0.14753	-0.0173296	0.089815		-0.102657	-0.350986	-0.261171
	498.983	-0.005		-0.204014	-0.0881473	-0.156179	0.0135553	0.0534965		-0.074592	-0.360193	-0.306696
	498.984	-0.7695		-0.204529	-0.0908743	-0.16446	0.0436594	0.00336376		-0.047215	-0.368989	-0.365625
	498.985	-0.293		-0.204999	-0.0935051	-0.172335	0.0721361	-0.0536694		-0.0213691	-0.377334	-0.431004
	498.986	-0.068		-0.205426	-0.0960359	-0.179766	0.0981515	-0.109495		0.00211556	-0.385192	-0.494687
	498.987	-0.0135		-0.205808	-0.0984632	-0.186716	0.120904	-0.156015		0.0224404	-0.392524	-0.54854
	498.988	-0.908		-0.206146	-0.100784	-0.193151	0.139643	-0.186357		0.038859	-0.399298	-0.585654
	498.989	-0.607		-0.20644	-0.102995	-0.199038	0.153694	-0.195899		0.0506994	-0.405478	-0.601377
	498.99	-0.482		-0.20669	-0.105092	-0.204345	0.162478	-0.182968		0.0573859	-0.411035	-0.594003
	498.991	-0.746		-0.206895	-0.107075	-0.209045	0.165537	-0.149096		0.0584625	-0.415939	-0.565035
	498.992	-0.415		-0.207056	-0.108938	-0.213109	0.162553	-0.0988016		0.0536144	-0.420165	-0.518967
	498.993	-0.613		-0.207172	-0.110682	-0.216516	0.153369	-0.0389425		0.0426877	-0.423688	-0.46263
	498.994	0.124		-0.207244	-0.112302	-0.219243	0.138009	0.0222711		0.0257069	-0.426486	-0.404215
	498.995	0.048		-0.207271	-0.113797	-0.221271	0.116684	0.0764425		0.00288651	-0.428542	-0.352099
	498.996	-0.207		-0.207254	-0.115166	-0.222585	0.0898053	0.11617		-0.0253606	-0.429839	-0.313669
	498.997	-0.708		-0.207192	-0.116406	-0.223172	0.0579832	0.13607		-0.0584228	-0.430364	-0.294294
	498.998	-0.500667		-0.207086	-0.117516	-0.223023	0.0220205	0.133506		-0.0954957	-0.430109	-0.296603
	498.999	-0.854		-0.206936	-0.118495	-0.22213	-0.0171006	0.108918		-0.135596	-0.429066	-0.320148
	499	-0.582667		-0.206741	-0.119342	-0.220491	-0.0582401	0.0657291		-0.177582	-0.427232	-0.361503
	499.001	-0.834667		-0.206502	-0.120056	-0.218106	-0.100129	0.00984356		-0.220186	-0.424608	-0.414765
	499.002	-0.352		-0.206219	-0.120637	-0.214977	-0.141407	-0.0511816		-0.262044	-0.421196	-0.472378
	499.003	-1.09833		-0.205892	-0.121083	-0.211111	-0.180663	-0.10917		-0.301746	-0.417003	-0.526173
	499.004	-0.751667		-0.205521	-0.121395	-0.206519	-0.216482	-0.156422		-0.337877	-0.41204	-0.568462
	499.005	-0.122		-0.205106	-0.121573	-0.201212	-0.247499	-0.18673		-0.369072	-0.406318	-0.593048
	499.006	-1.50833		-0.204648	-0.121616	-0.195207	-0.272448	-0.196174		-0.394064	-0.399855	-0.596029
	499.007	-1.04333		-0.204146	-0.121526	-0.188525	-0.290213	-0.183616		-0.411739	-0.39267	-0.576286
	499.008	-3.012		-0.2036	-0.121303	-0.181187	-0.299879	-0.150816		-0.421182	-0.384787	-0.535603
	499.009	-0.9555		-0.203011	-0.120947	-0.173219	-0.300775	-0.10219		-0.421722	-0.376231	-0.478421
	499.01	-0.301333		-0.202379	-0.12046	-0.164651	-0.292507	-0.0442159		-0.412967	-0.36703	-0.411246
	499.011	0.037		-0.201704	-0.119842	-0.155513	-0.274992	0.0154026		-0.394834	-0.357217	-0.341815
	499.012	-0.1615		-0.200987	-0.119096	-0.14584	-0.24847	0.0687307		-0.367566	-0.346827	-0.278096
	499.013	-0.404		-0.200226	-0.118222	-0.135669	-0.213512	0.108621		-0.331735	-0.335895	-0.227275
	499.014	-0.515667		-0.199424	-0.117223	-0.125039	-0.171016	0.129635		-0.288239	-0.324463	-0.194828
	499.015	-1.13467		-0.198579	-0.116101	-0.113991	-0.122182	0.128759		-0.238282	-0.312571	-0.183811
	499.016	-0.113		-0.197693	-0.114856	-0.10257	-0.0684861	0.105821		-0.183342	-0.300263	-0.194442
	499.017	-0.870667		-0.196765	-0.113493	-0.0908213	-0.0116364	0.0635564		-0.125129	-0.287586	-0.22403
	499.018	-0.293333		-0.195795	-0.112012	-0.0787916	0.0464828	0.00730972		-0.0655297	-0.274587	-0.267277
	499.019	-0.827		-0.194785	-0.110418	-0.06653	0.103871	-0.0555972		-0.00654746	-0.261315	-0.316912
	499.02	0.279333		-0.193733	-0.108712	-0.0540866	0.158479	-0.116769		0.0497668	-0.24782	-0.364589
	499.021	0.257		-0.192641	-0.106898	-0.0415127	0.208286	-0.167806		0.101388	-0.234154	-0.40196
	499.022	1.672		-0.191509	-0.104978	-0.0288602	0.25137	-0.201404		0.146391	-0.220369	-0.421773
	499.023	0.825		-0.190337	-0.102957	-0.0161819	0.285982	-0.212365		0.183025	-0.206519	-0.418883
	499.024	0.537333		-0.189125	-0.100837	-0.00353056	0.310617	-0.198365		0.20978	-0.192656	-0.391021
	499.025	-1.162		-0.187874	-0.0986214	0.0090405	0.324075	-0.160382		0.225453	-0.178834	-0.339216
	499.026	0.0826667		-0.186584	-0.0963147	0.0214783	0.325516	-0.102705		0.229201	-0.165106	-0.267811
	499.027	0.206		-0.185255	-0.0939202	0.0337301	0.314501	-0.0324955		0.220581	-0.151525	-0.184021
	499.028	0.053		-0.183888	-0.0914421	0.0457438	0.291024	0.0410496		0.199582	-0.138145	-0.097095
	499.029	0.226		-0.182484	-0.0888842	0.0574682	0.255522	0.107864		0.166638	-0.125015	-0.0171511
	499.03	0.121667		-0.181041	-0.0862507	0.0688529	0.208877	0.158353		0.122627	-0.112188	0.0461643
	499.031	0.276		-0.179562	-0.0835459	0.079849	0.152398	0.184735		0.0688519	-0.0997126	0.0850225
	499.032	0.0935		-0.178045	-0.080774	0.0904092	0.0877852	0.182213		0.00701121	-0.0876362	0.0945768
	499.033	0.491		-0.176493	-0.0779395	0.100488	0.0170862	0.149778		-0.0608533	-0.0760052	0.073773
	499.034	0.033		-0.174904	-0.0750469	0.11004	-0.0573706	0.0905352		-0.132417	-0.0648638	0.0256713
	499.035	0.464333		-0.17328	-0.0721007	0.119026	-0.133049	0.0114605		-0.20515	-0.0542541	-0.0427937
	499.036	0.052		-0.171621	-0.0691056	0.127405	-0.20729	-0.0773944		-0.276396	-0.0442159	-0.12161
	499.037	-0.743		-0.169927	-0.0660662	0.135141	-0.277404	-0.164174		-0.34347	-0.0347863	-0.19896
	499.038	-1.30433		-0.1682	-0.0629873	0.142199	-0.340767	-0.236805		-0.403754	-0.0260001	-0.262806
	499.039	-0.548		-0.166438	-0.0598738	0.148549	-0.394915	-0.284686		-0.454788	-0.0178891	-0.302575
	499.04	-0.318		-0.164643	-0.0567303	0.154161	-0.437642	-0.300234		-0.494372	-0.0104819	-0.310715
	499.041	-0.284		-0.162815	-0.0535618	0.159011	-0.467088	-0.280074		-0.52065	-0.00380444	-0.283878
	499.042	-0.004		-0.160955	-0.0503731	0.163076	-0.481816	-0.225666		-0.532189	0.00212087	-0.223545
	499.043	-0.880333		-0.159064	-0.0471692	0.166338	-0.480878	-0.143263		-0.528047	0.00727482	-0.135989
	499.044	-0.63		-0.157141	-0.0439549	0.168782	-0.463867	-0.0431889		-0.507822	0.0116416	-0.0315472
	499.045	-0.643		-0.155187	-0.0407351	0.170396	-0.43095	0.0614996		-0.471685	0.0152089	0.0767085
	499.046	1.68233		-0.153202	-0.0375148	0.17117	-0.382878	0.156769		-0.420393	0.017968	0.174737
	499.047	-0.529667		-0.151189	-0.0342987	0.171102	-0.320982	0.229558		-0.355281	0.0199135	0.249471
	499.048	0.24		-0.149145	-0.0310918	0.170189	-0.247137	0.269628		-0.278229	0.021044	0.290672
	499.049	0.116		-0.147074	-0.0278989	0.168435	-0.163714	0.271049		-0.191612	0.0213612	0.29241
	499.05	0.572		-0.144974	-0.0247248	0.165845	-0.0735046	0.233088		-0.0982294	0.0208709	0.253959
	499.051	-0.66		-0.142846	-0.0215741	0.162428	0.0203653	0.160376		-0.00120879	0.0195821	0.179959
	499.052	1.8965		-0.140692	-0.0184517	0.158199	0.114547	0.0623002		0.0960955	0.0175075	0.0798077
	499.053	0.541		-0.13851	-0.0153622	0.153174	0.205586	-0.048281		0.190224	0.0146633	-0.0336177
	499.054	-0.336667		-0.136304	-0.0123101	0.147372	0.290049	-0.15682		0.277739	0.0110688	-0.145752
	499.055	-0.448667		-0.134071	-0.00930002	0.140818	0.364655	-0.249108		0.355355	0.00674711	-0.242361
	499.056	-0.511		-0.131814	-0.00633632	0.133539	0.426407	-0.313236		0.42007	0.00172413	-0.311512
	499.057	-0.364667		-0.129533	-0.00342339	0.125562	0.472709	-0.341223		0.469286	-0.00397095	-0.345194
	499.058	-0.208		-0.127229	-0.000565489	0.116923	0.501487	-0.330055		0.500921	-0.010306	-0.340361
	499.059	0.088		-0.124901	0.0022332	0.107655	0.511273	-0.282006		0.513506	-0.017246	-0.299252
	499.06	-0.092		-0.122552	0.00496862	0.0977981	0.501289	-0.204202		0.506258	-0.0247534	-0.228955
	499.061	0.841667		-0.12018	0.00763677	0.087392	0.471488	-0.107497		0.479125	-0.0327881	-0.140285
	499.062	0.772		-0.117788	0.0102338	0.0764801	0.42258	-0.00486671		0.432814	-0.0413074	-0.0461741
	499.063	0.954333		-0.115375	0.012756	0.0651077	0.356023	0.0904576		0.368779	-0.0502669	0.0401907
	499.064	0.715		-0.112942	0.0151997	0.053322	0.273984	0.166811		0.289184	-0.0596198	0.107191
	499.065	0.787		-0.11049	0.0175615	0.041172	0.179273	0.215617		0.196834	-0.0693179	0.146299
	499.066	0.980333		-0.108019	0.0198379	0.0287082	0.0752449	0.232391		0.0950828	-0.0793111	0.153079
	499.067	0.196667		-0.105531	0.0220257	0.0159827	-0.0343171	0.217109		-0.0122914	-0.0895484	0.12756
	499.068	-0.311		-0.103025	0.0241219	0.00304826	-0.145345	0.173914		-0.121223	-0.0999772	0.0739363
	499.069	-0.4915		-0.100503	0.0261235	-0.0100411	-0.25364	0.110241		-0.227517	-0.110544	-0.000303488
	499.07	-0.635		-0.0979654	0.0280277	-0.0232309	-0.355039	0.035539		-0.327011	-0.121196	-0.0856573
	499.071	-0.475333		-0.0954121	0.0298319	-0.0364661	-0.445578	-0.040205		-0.415746	-0.131878	-0.172083
	499.072	-0.777		-0.0928443	0.0315335	-0.0496915	-0.521658	-0.107887		-0.490124	-0.142536	-0.250423
	499.073	-0.802		-0.0902626	0.0331302	-0.0628521	-0.580193	-0.160446		-0.547063	-0.153115	-0.313561
	499.074	-0.453		-0.0876677	0.0346199	-0.075893	-0.618746	-0.193607		-0.584126	-0.163561	-0.357168
	499.075	-1.85		-0.0850603	0.0360006	-0.0887598	-0.635631	-0.206121		-0.59963	-0.17382	-0.379941
	499.076	-3.772		-0.082441	0.0372704	-0.101399	-0.629997	-0.199527		-0.592726	-0.18384	-0.383367
	499.077	-0.660333		-0.0798105	0.0384275	-0.113758	-0.60187	-0.17751		-0.563443	-0.193568	-0.371078
	499.078	-0.831		-0.0771695	0.0394707	-0.125785	-0.552166	-0.145018		-0.512696	-0.202954	-0.347973
	499.079	-0.223		-0.0745188	0.0403984	-0.13743	-0.482659	-0.107311		-0.44226	-0.211948	-0.31926
	499.08	-0.826333		-0.071859	0.0412095	-0.148644	-0.395918	-0.0691091		-0.354708	-0.220503	-0.289612
	499.081	-0.0693333		-0.0691907	0.0419031	-0.159382	-0.295213	-0.0339899		-0.25331	-0.228573	-0.262563
[truncated: 5,116 more rows]

## Sheet: lag-1 and Filters - 5 kyr 
	Time Scale (ATS WaverideR)	Ti (Z-score)		405 kyr filter (350-450)	405kyr hilbert enveloppe	173 kyr filter (150-193)	173 kyr hilbert enveloppe	100 kyr filter (85-140)	100kyr hilbert enveloppe	31 kyr filter (27-40)	31 kyr hilbert enveloppe		lag1 (window 20-90 kyr)	lag1 background filter (500-∞ kyr)	Lag1 sd		lag 1 and filtering of the Milankovitch cycles based on the WaverideR (WR) Age model
Data from Zhao et al (2022)	497.083	1.575		-0.0701033	0.0895504	0.0574476	0.109666	-0.0732267	0.122763	0.364134	0.474953		0.296921	0.447448	0.147644
	497.088	0.103		-0.0655934	0.07627	0.0665399	0.0900029	-0.0820793	0.101907	0.0645853	0.559097		0.319317	0.445706	0.142877
	497.093	-2.104		-0.0606088	0.0721536	0.0733136	0.0930691	-0.0850895	0.102397	-0.345619	0.551334		0.343509	0.444056	0.168815
	497.098	1.033		-0.0551717	0.0775965	0.0774463	0.0922408	-0.0811564	0.108617	-0.491626	0.619223		0.373309	0.442504	0.201575
	497.103	0.103		-0.0493074	0.0753361	0.078705	0.0928312	-0.069703	0.109599	-0.205784	0.669964		0.40272	0.441057	0.230331
	497.108	-0.925		-0.0430448	0.081722	0.0769588	0.0944305	-0.0507907	0.119746	0.287094	0.678822		0.389462	0.439719	0.206193
	497.113	1.54		-0.0364158	0.0805599	0.0721881	0.0935611	-0.025181	0.121971	0.546167	0.723904		0.375311	0.438498	0.185539
	497.118	1.157		-0.0294557	0.0866487	0.0644888	0.0954964	0.00566352	0.133133	0.316096	0.756233		0.376687	0.437397	0.190765
	497.123	-0.833		-0.0222025	0.0862417	0.054073	0.0936616	0.0396434	0.136958	-0.215658	0.75836		0.371061	0.436422	0.204659
	497.128	0.703		-0.0146972	0.0918587	0.0412643	0.0952628	0.0741484	0.148062	-0.567667	0.777862		0.355742	0.435579	0.196216
	497.133	-2.057		-0.00698339	0.0920131	0.0264883	0.0928017	0.106238	0.153636	-0.407219	0.783897		0.348955	0.434871	0.188332
	497.138	1.148		0.000893051	0.0971562	0.0102588	0.0937842	0.132865	0.164125	0.123216	0.770813		0.352592	0.434304	0.197152
	497.143	1.136		0.00888393	0.0977473	-0.00684057	0.0909714	0.151128	0.171423	0.523993	0.77333		0.369985	0.433882	0.186882
	497.148	-0.359		0.0169392	0.102448	-0.0241781	0.0912192	0.158532	0.181048	0.412539	0.76521		0.40911	0.433609	0.201698
	497.153	0.062		0.0250072	0.103387	-0.0410983	0.0882929	0.153244	0.189874	-0.0973383	0.739793		0.441634	0.433489	0.221658
	497.158	0.815		0.033035	0.107679	-0.0569486	0.0877922	0.134318	0.198651	-0.497645	0.723695		0.431257	0.433525	0.212459
	497.163	-1.487		0.0409684	0.108902	-0.0711063	0.0849617	0.10188	0.208656	-0.390945	0.69926		0.413533	0.43372	0.215751
	497.168	-0.763		0.048753	0.112817	-0.083005	0.0837758	0.057237	0.216816	0.102246	0.664908		0.411916	0.434077	0.228556
	497.173	1.24		0.0563336	0.114269	-0.0921596	0.0812183	0.00290339	0.227526	0.462767	0.643653		0.402294	0.4346	0.214375
	497.178	-0.472		0.0636555	0.117835	-0.0981884	0.0794741	-0.0574723	0.235432	0.314943	0.619917		0.386708	0.435289	0.216158
	497.183	0.063		0.0706641	0.119473	-0.100831	0.0773266	-0.119299	0.246307	-0.17297	0.587913		0.364337	0.436148	0.22999
	497.188	-1.189		0.0773058	0.122714	-0.0999618	0.0752029	-0.17735	0.254323	-0.46862	0.566972		0.333923	0.437177	0.203939
	497.193	-1.579		0.0835283	0.1245	-0.0955976	0.0735505	-0.226176	0.264839	-0.254074	0.548442		0.32914	0.438378	0.200636
	497.198	0.757		0.0892808	0.127437	-0.0878986	0.0712609	-0.260606	0.273198	0.227775	0.527748		0.3283	0.439751	0.200735
	497.203	0.254		0.0945147	0.129339	-0.0771642	0.0701253	-0.276293	0.282921	0.445511	0.52125		0.324298	0.441297	0.18872
	497.208	0.78		0.0991838	0.131991	-0.0638216	0.0678934	-0.270251	0.291632	0.167673	0.520658		0.334197	0.443017	0.193655
	497.213	-2.41		0.103245	0.13398	-0.0484083	0.0672266	-0.241319	0.300272	-0.290334	0.515325		0.352426	0.444909	0.1928
	497.218	-1.155		0.106657	0.136364	-0.0315508	0.0652529	-0.190488	0.309089	-0.427964	0.518612		0.398567	0.446973	0.182945
	497.223	0.628		0.109384	0.138413	-0.0139371	0.0649422	-0.121023	0.316521	-0.110848	0.527817		0.474599	0.449209	0.168473
	497.228	-0.258		0.111394	0.140548	0.00371236	0.0633697	-0.0383365	0.324991	0.301714	0.532367		0.541752	0.451613	0.163142
	497.233	0.024		0.112658	0.142633	0.0206765	0.0632585	0.0504024	0.331227	0.369115	0.54204		0.589886	0.454186	0.177633
	497.238	-0.0285		0.113153	0.144535	0.0362654	0.0621491	0.136914	0.338801	0.0420775	0.553817		0.630647	0.456924	0.181732
	497.243	-0.4665		0.11286	0.146635	0.0498504	0.0620686	0.212648	0.343936	-0.313559	0.555406		0.672895	0.459824	0.170108
	497.248	0.707		0.111764	0.148319	0.0608931	0.0613992	0.269732	0.350098	-0.330078	0.556599		0.700846	0.462885	0.162248
	497.253	0.0605		0.109859	0.150413	0.0689684	0.0612017	0.301914	0.354246	-0.0173023	0.55857		0.680559	0.466102	0.178684
	497.258	1.898		0.107141	0.151897	0.0737842	0.0608811	0.305372	0.358638	0.28082	0.550851		0.616671	0.469471	0.17982
	497.263	1.1355		0.103614	0.153967	0.0751939	0.0604644	0.279277	0.361863	0.265986	0.541224		0.586829	0.472989	0.169113
	497.268	0.8125		0.0992864	0.155266	0.0732028	0.0603613	0.226009	0.364362	-0.0181725	0.529711		0.621003	0.476651	0.153194
	497.273	0.3885		0.0941732	0.157297	0.0679669	0.0596808	0.150986	0.366647	-0.263213	0.506002		0.685772	0.480453	0.140782
	497.278	0.953		0.0882951	0.158427	0.0597856	0.0596539	0.0621021	0.367369	-0.230145	0.478798		0.707219	0.484388	0.143592
	497.283	-0.391		0.0816788	0.160404	0.049087	0.0587224	-0.031155	0.36861	0.0198573	0.450641		0.705063	0.488451	0.154553
	497.288	0.709		0.074357	0.161382	0.0364075	0.0586459	-0.11881	0.367858	0.217634	0.413159		0.680882	0.492637	0.134319
	497.293	0.483		0.0663677	0.163291	0.0223665	0.0575271	-0.191577	0.367902	0.175733	0.373728		0.619165	0.49694	0.165167
	497.298	-1.573		0.0577546	0.164135	0.00763754	0.0573097	-0.241957	0.366057	-0.0345411	0.333735		0.537393	0.501352	0.190896
	497.303	-0.4915		0.0485669	0.165966	-0.00708372	0.0561078	-0.265104	0.364774	-0.185154	0.285455		0.497716	0.505867	0.178402
	497.308	0.0675		0.0388584	0.166692	-0.0211115	0.0557053	-0.259356	0.362183	-0.140388	0.237443		0.47928	0.510478	0.183726
	497.313	-0.7065		0.028688	0.168435	-0.0338018	0.0545521	-0.226357	0.359541	0.0176487	0.19525		0.487985	0.515178	0.191739
	497.318	0.241		0.0181188	0.16906	-0.0445822	0.0539756	-0.170768	0.356441	0.105755	0.156028		0.468683	0.519958	0.183497
	497.323	0.3825		0.00721784	0.170709	-0.052978	0.0530149	-0.0996201	0.35258	0.0508223	0.129715		0.440514	0.524812	0.187977
	497.328	0.851		-0.0039443	0.17125	-0.058634	0.0523326	-0.0214034	0.34909	-0.0446027	0.127526		0.426557	0.529731	0.195808
	497.333	-0.1995		-0.015294	0.172798	-0.0613302	0.0517	0.0549712	0.344369	-0.0457459	0.145927		0.427288	0.534707	0.207564
	497.338	-0.4555		-0.026755	0.173272	-0.0609914	0.0510302	0.121205	0.340565	0.0422276	0.174951		0.441726	0.539731	0.225381
	497.343	1.129		-0.0382493	0.174717	-0.0576902	0.0508296	0.170504	0.335558	0.0835488	0.212006		0.429925	0.544795	0.204131
	497.348	-0.0185		-0.0496973	0.175141	-0.051643	0.050321	0.198233	0.331613	-0.00901223	0.250007		0.420605	0.549891	0.195982
	497.353	-0.7315		-0.0610185	0.17648	-0.043199	0.0505997	0.202275	0.327073	-0.148485	0.279977		0.430862	0.555008	0.201365
	497.358	-0.581		-0.0721322	0.176872	-0.0328236	0.0503992	0.183076	0.323404	-0.164959	0.306968		0.452823	0.560139	0.218559
	497.363	-0.113		-0.0829582	0.178105	-0.0210759	0.0511343	0.143411	0.32018	-0.010798	0.330092		0.457322	0.565273	0.232077
	497.368	0.296		-0.0934171	0.178479	-0.00858238	0.0513493	0.0879321	0.317532	0.16923	0.343114		0.428794	0.570403	0.214664
	497.373	0.4585		-0.103431	0.179609	0.0039931	0.052453	0.0225838	0.31646	0.1924	0.351843		0.408125	0.575518	0.206575
	497.378	-0.731		-0.112925	0.179982	0.0159809	0.0531253	-0.0460339	0.31584	0.037036	0.354434		0.402596	0.58061	0.197821
	497.383	-1.268		-0.121826	0.181013	0.0267375	0.0544713	-0.111273	0.317605	-0.141553	0.345243		0.403511	0.58567	0.183692
	497.388	-0.589		-0.130064	0.181399	0.0356766	0.0555732	-0.166966	0.320047	-0.183153	0.331269		0.443299	0.590687	0.187518
	497.393	-0.63125		-0.137575	0.182335	0.0422977	0.0570303	-0.207848	0.325063	-0.0780011	0.31123		0.493407	0.595653	0.210253
	497.398	0.0088		-0.144297	0.182748	0.0462105	0.0584803	-0.229874	0.331285	0.0532946	0.282128		0.52329	0.60056	0.225429
	497.403	-0.7268		-0.150174	0.183598	0.0471552	0.0599407	-0.230446	0.339646	0.100384	0.251557		0.528378	0.605396	0.20302
	497.408	-0.246		-0.155157	0.18405	0.045016	0.0616282	-0.208575	0.349804	0.0569334	0.216558		0.509193	0.610155	0.201056
	497.413	1.056		-0.1592	0.184822	0.039829	0.063022	-0.165	0.361332	-0.00933654	0.175911		0.516815	0.614826	0.18446
	497.418	-0.3768		-0.162266	0.185324	0.031782	0.0648308	-0.102266	0.375018	-0.0420079	0.138155		0.579194	0.619402	0.165774
	497.423	0.106		-0.164322	0.186028	0.0212082	0.0661291	-0.0247332	0.389372	-0.0375581	0.101483		0.639312	0.623873	0.178561
	497.428	-0.8625		-0.165346	0.186591	0.00857234	0.067955	0.061511	0.405831	-0.022099	0.0768645		0.669076	0.628232	0.18459
	497.433	-0.5642		-0.165318	0.187238	-0.00554926	0.0691659	0.148896	0.422599	-0.0116551	0.0791368		0.663485	0.632469	0.184797
	497.438	-0.8666		-0.164229	0.187868	-0.0204945	0.0709285	0.22881	0.441001	-0.0012569	0.100102		0.625458	0.636578	0.171248
	497.443	-1.191		-0.162077	0.188471	-0.0355454	0.0720883	0.292273	0.459739	0.0156871	0.133662		0.606036	0.64055	0.175602
	497.448	-1.3092		-0.158867	0.189175	-0.0499618	0.0737376	0.330807	0.479381	0.0276551	0.165463		0.642514	0.644378	0.183566
	497.453	-0.2874		-0.154611	0.189746	-0.0630159	0.0749005	0.337453	0.499608	0.0122265	0.195011		0.705779	0.648054	0.18727
	497.458	-0.6085		-0.14933	0.190528	-0.0740277	0.0764198	0.307819	0.519978	-0.0333984	0.222264		0.711638	0.651572	0.188283
	497.463	0.9205		-0.143051	0.19108	-0.082398	0.0776467	0.240984	0.541169	-0.0747948	0.240471		0.680528	0.654926	0.168437
	497.468	-0.2424		-0.13581	0.191943	-0.0876389	0.0790504	0.140124	0.561921	-0.066491	0.254238		0.645144	0.658107	0.187639
	497.473	1.127		-0.127648	0.192488	-0.0893991	0.0803975	0.0126803	0.58351	-0.00220461	0.262867		0.623331	0.661112	0.220239
	497.478	0.4062		-0.118615	0.193431	-0.0874832	0.081726	-0.130011	0.604371	0.0696698	0.262861		0.655915	0.663933	0.204062
	497.483	0.4772		-0.108766	0.193982	-0.0818637	0.0832348	-0.273667	0.625779	0.0911348	0.260318		0.696057	0.666567	0.201048
	497.488	-0.4648		-0.0981617	0.195005	-0.0726857	0.0845453	-0.402508	0.646456	0.0509232	0.252736		0.715171	0.669007	0.207276
	497.493	-1.837		-0.08687	0.195575	-0.0602626	0.0862352	-0.501057	0.667132	-0.0146149	0.239751		0.689566	0.671249	0.174241
	497.498	-1.882		-0.0749631	0.196674	-0.0450641	0.0875905	-0.556072	0.68725	-0.0702636	0.228433		0.67093	0.673289	0.176623
	497.503	-1.647		-0.0625178	0.197272	-0.0276968	0.089455	-0.55833	0.706708	-0.108531	0.216486		0.712009	0.675123	0.17788
	497.508	-0.89925		-0.0496155	0.198442	-0.00887684	0.0909114	-0.50402	0.725802	-0.120556	0.209812		0.789696	0.676749	0.139952
	497.513	-1.6922		-0.0363407	0.199079	0.0106015	0.09292	-0.395515	0.743644	-0.0705353	0.213918		0.855218	0.678162	0.0997548
	497.518	0.4946		-0.0227811	0.200313	0.0299026	0.0945173	-0.241406	0.761194	0.0607348	0.225605		0.888296	0.67936	0.085058
	497.523	0.6322		-0.00902687	0.200999	0.0481877	0.0966205	-0.0557506	0.777116	0.204994	0.249958		0.874274	0.680342	0.0970667
	497.528	0.954		0.00483035	0.202289	0.0646541	0.0983755	0.143372	0.792616	0.224087	0.28173		0.810177	0.681105	0.147904
	497.533	1.4502		0.0186978	0.203029	0.0785722	0.100514	0.335821	0.806391	0.044271	0.316975		0.733284	0.681648	0.210999
	497.538	1.45275		0.0324823	0.204367	0.0893194	0.102418	0.501636	0.819421	-0.226829	0.357295		0.656613	0.68197	0.245832
	497.543	0.5035		0.046091	0.205167	0.096409	0.10453	0.623273	0.830876	-0.3579	0.395578		0.591486	0.682072	0.253
	497.548	0.8844		0.059432	0.206543	0.0995122	0.106554	0.687557	0.841148	-0.205087	0.432405		0.572151	0.681952	0.249724
	497.553	1.862		0.0724149	0.207406	0.0984724	0.108586	0.687145	0.850135	0.130368	0.468454		0.601951	0.681611	0.233674
	497.558	2.023		0.0849517	0.208809	0.0933117	0.11068	0.621314	0.857511	0.372436	0.498032		0.676937	0.681051	0.202509
	497.563	0.4526		0.096957	0.209738	0.0842285	0.112593	0.496022	0.863886	0.313773	0.523669		0.761701	0.680273	0.155044
	497.568	0.562		0.108349	0.211158	0.0715865	0.114701	0.323247	0.868352	0.000777272	0.544063		0.805187	0.679277	0.129219
	497.573	-0.052		0.11905	0.212152	0.0558974	0.116472	0.119697	0.871972	-0.310112	0.55475		0.788283	0.678067	0.114821
	497.578	-0.847		0.128987	0.213579	0.037795	0.118534	-0.0949491	0.873587	-0.374222	0.559483		0.720968	0.676645	0.157312
	497.583	-0.173		0.138091	0.214636	0.0180067	0.120157	-0.30007	0.874316	-0.156188	0.556399		0.656895	0.675014	0.182482
	497.588	0.128		0.146301	0.21606	-0.00268086	0.12212	-0.476195	0.873152	0.156222	0.54335		0.638905	0.673177	0.173162
	497.593	-0.1614		0.153558	0.217177	-0.0234563	0.123607	-0.606936	0.870881	0.315945	0.524577		0.60238	0.671138	0.170027
	497.598	0.0008		0.159814	0.218588	-0.0435184	0.125431	-0.680584	0.866984	0.215824	0.497106		0.560352	0.668901	0.161451
	497.603	0.267		0.165025	0.21976	-0.0621098	0.126807	-0.691194	0.861655	-0.0353409	0.460016		0.539722	0.666471	0.184985
	497.608	-0.89575		0.169153	0.221149	-0.0785465	0.128466	-0.639088	0.85502	-0.217531	0.417244		0.527523	0.663852	0.220532
	497.613	-1.6796		0.172169	0.222371	-0.0922437	0.129766	-0.530704	0.846648	-0.194987	0.365868		0.557782	0.66105	0.245752
	497.618	-0.603		0.174052	0.223728	-0.102735	0.131252	-0.377823	0.837243	-0.0287101	0.307314		0.660512	0.658069	0.204747
	497.623	-0.34		0.174787	0.224992	-0.109688	0.132512	-0.196261	0.825924	0.0998605	0.245685		0.77258	0.654917	0.150999
	497.628	0.0992		0.174367	0.226312	-0.112909	0.133838	-0.0041499	0.813726	0.0785723	0.178332		0.825472	0.651598	0.127025
	497.633	0.5802		0.172794	0.22761	-0.112348	0.135094	0.179981	0.799641	-0.0284858	0.107974		0.820709	0.64812	0.126837
	497.638	0.23925		0.170075	0.228886	-0.108088	0.136286	0.339135	0.784692	-0.0700273	0.0424595		0.773673	0.644489	0.149856
	497.643	2.425		0.166227	0.23021	-0.100343	0.137566	0.459557	0.768095	0.00934776	0.0531179		0.684651	0.640711	0.189888
	497.648	1.395		0.161273	0.231436	-0.0894394	0.138661	0.532029	0.750547	0.10319	0.122975		0.630232	0.636795	0.208115
	497.653	1.042		0.155244	0.232776	-0.0757984	0.139982	0.55262	0.731749	0.0732927	0.194072		0.652247	0.632747	0.18951
	497.658	1.8978		0.148178	0.233949	-0.0599189	0.141025	0.522799	0.711886	-0.0753111	0.264305		0.711772	0.628575	0.15024
	497.663	-0.0854		0.14012	0.235297	-0.042356	0.142388	0.448934	0.691244	-0.184211	0.328423		0.765966	0.624287	0.126016
	497.668	0.0046		0.13112	0.236414	-0.0237006	0.143419	0.341251	0.669485	-0.117267	0.385947		0.768994	0.61989	0.141223
	497.673	-0.025		0.121237	0.23776	-0.00455909	0.144814	0.212426	0.647395	0.0765657	0.438072		0.75463	0.615393	0.160992
	497.678	0.3034		0.110533	0.238819	0.0144647	0.145867	0.0759976	0.624271	0.203512	0.479925		0.721537	0.610804	0.162008
	497.683	-0.45725		0.0990761	0.240154	0.0327868	0.14727	-0.0551782	0.601172	0.129201	0.511718		0.643775	0.606131	0.17504
	497.688	-0.476		0.0869396	0.241156	0.0498576	0.148366	-0.170232	0.577299	-0.0775243	0.533745		0.563304	0.601383	0.191909
	497.693	-1.1614		0.074201	0.24247	0.0651747	0.149743	-0.261194	0.553695	-0.216207	0.541571		0.517857	0.596567	0.187744
	497.698	-0.1264		0.0609414	0.243415	0.0782933	0.150887	-0.32344	0.529748	-0.159294	0.53707		0.495892	0.591693	0.204318
	497.703	0.593		0.0472454	0.244702	0.0888344	0.152203	-0.355654	0.506239	0.0281656	0.52086		0.477396	0.586769	0.197972
	497.708	0.0538		0.0332001	0.245592	0.0964925	0.153384	-0.359392	0.482954	0.167103	0.489831		0.452439	0.581804	0.202762
	497.713	-0.0878		0.0188949	0.246843	0.10104	0.154603	-0.338348	0.460272	0.144379	0.44691		0.437186	0.576806	0.204998
	497.718	0.5415		0.00442065	0.24768	0.10233	0.155797	-0.297496	0.438472	0.00829955	0.39211		0.445919	0.571783	0.18673
	497.723	-0.11225		-0.0101309	0.248889	0.100303	0.156887	-0.242258	0.417514	-0.1016	0.323306		0.458125	0.566744	0.178529
	497.728	-0.209		-0.0246677	0.249678	0.0949837	0.158058	-0.177823	0.398134	-0.102148	0.244674		0.466267	0.561697	0.185335
	497.733	-0.733		-0.0390977	0.250839	0.0864852	0.159	-0.10871	0.379968	-0.0372896	0.156757		0.486179	0.556652	0.20899
	497.738	0.3142		-0.05333	0.251584	0.0750064	0.160109	-0.0386001	0.364056	-0.00668453	0.0594234		0.496962	0.551615	0.231305
	497.743	-0.0736		-0.067275	0.252692	0.0608309	0.160892	0.0295933	0.349844	-0.0371228	0.0427899		0.512492	0.546595	0.213976
	497.748	-0.1536		-0.080845	0.253398	0.0443232	0.161898	0.093485	0.338449	-0.0458543	0.149003		0.536767	0.541599	0.208334
	497.753	-0.255		-0.0939551	0.25445	0.0259232	0.162525	0.15092	0.329232	0.0503474	0.259047		0.542435	0.536637	0.212803
	497.758	-0.864		-0.106523	0.255123	0.00613836	0.163393	0.199716	0.323131	0.197301	0.367723		0.530307	0.531715	0.184108
	497.763	-0.423		-0.118471	0.256116	-0.0144663	0.163876	0.237538	0.319486	0.214648	0.474958		0.533574	0.526841	0.183683
	497.768	-0.2665		-0.129724	0.256762	-0.0352807	0.16458	0.261944	0.318841	-0.0119888	0.578594		0.54863	0.522022	0.173631
	497.773	-0.6828		-0.140213	0.257696	-0.0556652	0.164942	0.270622	0.320586	-0.348385	0.673491		0.550396	0.517265	0.170841
	497.778	-1.1644		-0.149872	0.25832	-0.0749677	0.165469	0.261753	0.324784	-0.472295	0.760285		0.539164	0.512577	0.194188
	497.783	1.038		-0.158643	0.259194	-0.0925439	0.165735	0.234442	0.330998	-0.179737	0.836852		0.50612	0.507964	0.218967
	497.788	1.37267		-0.166471	0.259803	-0.107778	0.166085	0.189097	0.338847	0.352016	0.899384		0.46718	0.503434	0.232639
	497.793	1.008		-0.173309	0.260619	-0.120104	0.166284	0.127692	0.348197	0.655723	0.949277		0.464298	0.498992	0.237895
	497.798	0.299		-0.179115	0.26122	-0.129029	0.166472	0.0538158	0.358323	0.40031	0.983991		0.497229	0.494643	0.248698
	497.803	-0.118667		-0.183853	0.261979	-0.134155	0.16663	-0.0275078	0.369438	-0.24501	1.00072		0.498194	0.490394	0.247373
	497.808	-1.1985		-0.187497	0.262578	-0.135197	0.166679	-0.110217	0.380602	-0.711938	1.00174		0.450425	0.486249	0.22494
	497.813	-3.73833		-0.190023	0.263285	-0.131996	0.166816	-0.18778	0.39229	-0.561446	0.985268		0.412067	0.482214	0.221306
	497.818	-1.199		-0.191418	0.263886	-0.12454	0.16676	-0.253843	0.403511	0.0694805	0.950759		0.417701	0.478294	0.215616
	497.823	0.513		-0.191673	0.264545	-0.112962	0.166888	-0.302872	0.414822	0.583985	0.901639		0.425242	0.474492	0.192797
	497.828	0.0106667		-0.190788	0.265155	-0.0975482	0.166761	-0.33069	0.425367	0.518975	0.836496		0.427522	0.470813	0.179161
	497.833	-0.24		-0.18877	0.26577	-0.0787317	0.166883	-0.334863	0.435575	0.0039671	0.756101		0.434998	0.46726	0.193528
	497.838	-1.276		-0.185631	0.266394	-0.0570826	0.166718	-0.314873	0.444895	-0.406839	0.664263		0.436993	0.463838	0.188705
	497.843	-0.823		-0.181391	0.266971	-0.0332916	0.166826	-0.2721	0.453456	-0.340637	0.560285		0.449251	0.460548	0.198736
	497.848	-0.138		-0.176077	0.267612	-0.00814827	0.166652	-0.209642	0.461123	0.0250669	0.446958		0.472217	0.457394	0.195984
	497.853	0.612667		-0.169722	0.268159	0.0174866	0.16673	-0.131994	0.467645	0.226229	0.328694		0.485982	0.454379	0.193611
	497.858	-0.232		-0.162365	0.268821	0.0427118	0.166562	-0.044679	0.473304	0.0710781	0.205227		0.492411	0.451504	0.21446
	497.863	-0.979		-0.154052	0.269344	0.0666197	0.16659	0.0461644	0.477525	-0.169477	0.0808555		0.48169	0.448772	0.176946
	497.868	-0.0416667		-0.144833	0.270029	0.088332	0.166435	0.134172	0.480888	-0.139426	0.04822		0.460032	0.446183	0.184637
	497.873	0.051		-0.134765	0.270535	0.107034	0.166387	0.213127	0.482659	0.142818	0.168391		0.405603	0.443739	0.178116
	497.878	1.371		-0.123908	0.271245	0.12201	0.166237	0.277312	0.483511	0.307727	0.285321		0.356013	0.441441	0.198768
	497.883	0.503333		-0.11233	0.271741	0.132672	0.16609	0.321839	0.482787	0.0998557	0.393997		0.339702	0.43929	0.202087
	497.888	-0.792		-0.100099	0.272477	0.138583	0.16593	0.342976	0.481018	-0.291684	0.494899		0.330565	0.437285	0.207088
	497.893	-0.542		-0.0872894	0.27297	0.139484	0.165664	0.338463	0.477842	-0.435762	0.584374		0.328475	0.435427	0.224669
	497.898	-0.163		-0.0739792	0.273732	0.135297	0.165467	0.307791	0.473473	-0.147449	0.661341		0.333683	0.433715	0.230831
	497.903	2.09		-0.0602484	0.274228	0.126139	0.16507	0.252419	0.467964	0.304929	0.727275		0.337945	0.432149	0.211355
	497.908	1.03367		-0.0461796	0.275015	0.112311	0.164808	0.175872	0.461152	0.485612	0.779231		0.374756	0.430728	0.211711
	497.913	-0.203		-0.0318574	0.275521	0.0942952	0.164274	0.0836761	0.453492	0.226985	0.817733		0.436902	0.429451	0.201024
	497.918	-0.220667		-0.0173682	0.276331	0.0727309	0.163918	-0.0169166	0.444521	-0.236801	0.844504		0.471155	0.428316	0.187233
	497.923	0.08		-0.00279908	0.276853	0.0483932	0.163252	-0.117429	0.434942	-0.512657	0.857646		0.488146	0.427321	0.197658
	497.928	0.532		0.0117622	0.277683	0.0221615	0.162777	-0.208869	0.424188	-0.381915	0.859927		0.493514	0.426465	0.196724
	497.933	0.38		0.026228	0.278225	-0.00501449	0.16199	-0.282601	0.412969	0.0541336	0.853774		0.49146	0.425746	0.21392
	497.938	-1.23133		0.0405111	0.279072	-0.0321524	0.161379	-0.331285	0.400855	0.466668	0.838638		0.482468	0.42516	0.228281
	497.943	-0.313		0.0545251	0.279638	-0.0582752	0.16049	-0.349763	0.388323	0.529791	0.818575		0.480857	0.424707	0.220515
	497.948	-0.472		0.0681853	0.280498	-0.0824492	0.159734	-0.335785	0.37528	0.160239	0.795211		0.457355	0.424382	0.203586
	497.953	0.253		0.0814088	0.281091	-0.103819	0.158766	-0.290431	0.361825	-0.381835	0.768482		0.436144	0.424183	0.190961
	497.958	-4.291		0.0941153	0.28196	-0.121643	0.157868	-0.218168	0.348275	-0.65462	0.742621		0.419951	0.424107	0.189671
	497.963	-0.879667		0.106227	0.282582	-0.135313	0.156845	-0.126493	0.334367	-0.396956	0.717823		0.440266	0.42415	0.199627
	497.968	0.301		0.11767	0.283455	-0.144387	0.155817	-0.0251764	0.320748	0.208168	0.694191		0.468116	0.424309	0.205169
	497.973	1.32767		0.128374	0.284106	-0.148592	0.154762	0.074801	0.306967	0.652728	0.674506		0.469215	0.424581	0.18611
	497.978	0.529		0.138272	0.284978	-0.147841	0.153627	0.16251	0.293784	0.54331	0.65642		0.46995	0.424961	0.171948
	497.983	0.316		0.147302	0.285659	-0.142229	0.15256	0.228358	0.280837	-0.036894	0.639361		0.487158	0.425447	0.176963
	497.988	-0.293333		0.155408	0.286524	-0.132024	0.151345	0.265247	0.268733	-0.589433	0.624277		0.485751	0.426033	0.185999
	497.993	0.4		0.162539	0.287234	-0.117661	0.15028	0.269435	0.257454	-0.634323	0.608295		0.4586	0.426716	0.211857
	497.998	-0.088		0.168647	0.288088	-0.0997146	0.149016	0.241006	0.247248	-0.12915	0.592543		0.451347	0.427493	0.213132
	498.003	-0.149667		0.173694	0.288823	-0.0788795	0.147961	0.183864	0.238532	0.487151	0.579205		0.45326	0.428358	0.206833
	498.008	0.519		0.177645	0.28966	-0.0559402	0.146679	0.10528	0.231144	0.663836	0.567929		0.447476	0.429308	0.208341
	498.013	-0.11		0.180472	0.290419	-0.0317405	0.145633	0.0150153	0.225773	0.222055	0.562586		0.443441	0.430338	0.215526
	498.018	0.652667		0.182155	0.291234	-0.00715047	0.144361	-0.0758418	0.221974	-0.456421	0.567244		0.412519	0.431445	0.212383
	498.023	-0.715		0.182679	0.292012	0.016966	0.143318	-0.1562	0.220338	-0.73636	0.583126		0.361971	0.432624	0.202235
	498.028	-1.21367		0.182036	0.292801	0.0397831	0.142076	-0.216281	0.220395	-0.313153	0.613925		0.328952	0.433871	0.202068
	498.033	-0.033		0.180227	0.293593	0.0605423	0.141026	-0.248786	0.222284	0.452191	0.661642		0.318359	0.435181	0.207948
	498.038	1.847		0.177257	0.294352	0.0785786	0.139825	-0.249752	0.225758	0.821534	0.723236		0.321354	0.436551	0.217521
	498.043	0.0993333		0.17314	0.295153	0.0933423	0.138754	-0.219032	0.230411	0.386606	0.796897		0.340754	0.437976	0.246295
	498.048	-0.514		0.167896	0.295878	0.104416	0.137599	-0.160308	0.236313	-0.483678	0.880306		0.333131	0.439452	0.231735
	498.053	-1.06533		0.161553	0.296682	0.111525	0.136495	-0.0806699	0.242707	-0.950456	0.967867		0.329002	0.440976	0.208509
	498.058	-0.658333		0.154144	0.297371	0.114545	0.135379	0.0102272	0.249863	-0.518351	1.0572		0.346872	0.442543	0.22821
	498.063	1.896		0.145711	0.298172	0.113498	0.134231	0.101309	0.257003	0.445948	1.14645		0.342514	0.444149	0.225233
	498.068	1.005		0.1363	0.298822	0.108553	0.133143	0.181416	0.264362	1.03461	1.23066		0.33499	0.445791	0.209999
	498.073	0.922333		0.125965	0.299615	0.100008	0.131945	0.240654	0.271427	0.666578	1.30815		0.361848	0.447465	0.240738
	498.078	0.5435		0.114766	0.300224	0.0882765	0.13087	0.271624	0.278194	-0.345639	1.37729		0.382456	0.449167	0.246045
	498.083	-0.928333		0.102766	0.301001	0.0738698	0.129621	0.270347	0.284557	-1.08077	1.43394		0.375274	0.450894	0.2057
	498.088	-0.75		0.0900368	0.301569	0.0573722	0.128543	0.236783	0.290203	-0.863585	1.47798		0.394802	0.452642	0.208193
	498.093	1.877		0.0766529	0.302325	0.0394167	0.127249	0.174862	0.295392	0.120633	1.50886		0.428535	0.454408	0.221384
	498.098	1.788		0.062694	0.30285	0.0206597	0.126152	0.0920052	0.299591	1.0037	1.5239		0.466886	0.456189	0.221822
	498.103	0.274667		0.0482438	0.30358	0.00175558	0.124827	-0.00181151	0.303252	1.0133	1.52432		0.519052	0.457982	0.225408
	498.108	0.565333		0.0333895	0.304063	-0.0166676	0.123701	-0.0953328	0.305805	0.145354	1.50985		0.559709	0.459784	0.263784
	498.113	-1.308		0.0182213	0.30476	-0.0340297	0.122361	-0.177481	0.307666	-0.845774	1.47894		0.536898	0.461593	0.247657
	498.118	-1.941		0.00283212	0.305203	-0.0498177	0.121201	-0.238793	0.308427	-1.10864	1.43416		0.492124	0.463405	0.225919
	498.123	-1.147		-0.0126833	0.305863	-0.0636005	0.119869	-0.272638	0.308283	-0.429963	1.37605		0.463916	0.465218	0.222343
	498.128	-1.49767		-0.0282287	0.306266	-0.0750398	0.118679	-0.276038	0.307121	0.587517	1.30475		0.45321	0.467031	0.229151
	498.133	1.58467		-0.043707	0.306886	-0.0838968	0.117378	-0.249977	0.304831	1.06026	1.22383		0.441124	0.46884	0.224343
	498.138	-0.410333		-0.0590209	0.307251	-0.0900339	0.116169	-0.199145	0.301616	0.605791	1.13379		0.448325	0.470644	0.229724
	498.143	-0.311		-0.0740734	0.307826	-0.0934125	0.114923	-0.13116	0.297106	-0.330979	1.03546		0.475023	0.472441	0.231879
	498.148	-1.061		-0.0887686	0.308157	-0.0940866	0.113712	-0.0553887	0.291731	-0.908244	0.932589		0.494374	0.474229	0.192339
	498.153	-1.35167		-0.103012	0.308685	-0.0921935	0.112545	0.0184522	0.285	-0.666825	0.825537		0.501238	0.476007	0.187535
	498.158	1.087		-0.116711	0.308983	-0.0879415	0.111356	0.0816916	0.277415	0.0856668	0.716138		0.481532	0.477773	0.210436
	498.163	2.18433		-0.129777	0.309462	-0.0815956	0.110288	0.127884	0.268543	0.631585	0.607935		0.462361	0.479526	0.20117
	498.168	2.277		-0.142122	0.309732	-0.0734628	0.109149	0.153593	0.25879	0.544682	0.500645		0.490775	0.481265	0.189819
	498.173	-0.267		-0.153666	0.310161	-0.0638771	0.108197	0.15866	0.247944	0.0303884	0.396063		0.558853	0.482988	0.180988
	498.178	-0.550333		-0.164329	0.310406	-0.0531843	0.107137	0.145945	0.236195	-0.372526	0.296728		0.603876	0.484695	0.190109
	498.183	0.6684		-0.17404	0.310784	-0.0417296	0.106312	0.120589	0.223633	-0.3444	0.202768		0.612363	0.486386	0.189838
	498.188	-0.751		-0.18273	0.311008	-0.029846	0.10536	0.0889552	0.210212	-0.0249088	0.121109		0.578187	0.488059	0.176175
	498.193	-2.1821		-0.190339	0.311337	-0.017845	0.10467	0.0574247	0.196316	0.215124	0.081148		0.525341	0.489713	0.179005
	498.198	-1.43532		-0.196811	0.311543	-0.00601068	0.103851	0.0312702	0.181735	0.15578	0.12064		0.522756	0.49135	0.188364
	498.203	-0.688548		-0.202097	0.311824	0.00540474	0.103299	0.0137883	0.167087	-0.105006	0.191315		0.564506	0.492968	0.216329
	498.208	-0.584		-0.206158	0.312017	0.0161821	0.102636	0.00583257	0.152152	-0.282403	0.26791		0.5706	0.494567	0.217072
	498.213	1.54367		-0.208959	0.312252	0.0261349	0.102219	0.00581208	0.137733	-0.167561	0.346064		0.531607	0.496146	0.201712
	498.218	-0.004		-0.210474	0.312434	0.0351069	0.101728	0.0101393	0.123836	0.182473	0.423317		0.487819	0.497707	0.198522
	498.223	-0.262		-0.210686	0.312626	0.0429684	0.101443	0.0140384	0.111515	0.460072	0.501177		0.458665	0.499249	0.204442
	498.228	0.928333		-0.209585	0.312803	0.0496124	0.101132	0.0125652	0.10128	0.34999	0.57903		0.443994	0.500772	0.199991
	498.233	-0.3015		-0.207168	0.312956	0.05495	0.100973	0.0016626	0.094525	-0.152636	0.655089		0.411712	0.502277	0.186145
	498.238	-0.391		-0.203444	0.313128	0.0589069	0.100844	-0.0209298	0.0920398	-0.648007	0.730608		0.36405	0.503764	0.159623
	498.243	-2.552		-0.198427	0.313247	0.0614207	0.100804	-0.055064	0.094651	-0.64151	0.803746		0.331681	0.505232	0.175012
	498.248	-0.575667		-0.192142	0.313419	0.0624389	0.100853	-0.0979745	0.101984	-0.0382093	0.872935		0.335488	0.506683	0.191474
	498.253	1.89267		-0.184619	0.313507	0.06192	0.100926	-0.144513	0.113392	0.678854	0.9388		0.332131	0.508117	0.193283
	498.258	0.803		-0.1759	0.313681	0.0598344	0.101142	-0.187804	0.127783	0.847087	0.998387		0.346553	0.509535	0.198416
	498.263	-0.319333		-0.166032	0.313744	0.0561686	0.101322	-0.220225	0.144323	0.263058	1.05027		0.379568	0.510936	0.24009
	498.268	-0.888667		-0.155072	0.313922	0.0509295	0.10169	-0.234581	0.16239	-0.58104	1.09431		0.375051	0.512322	0.228196
	498.273	-2.174		-0.143081	0.313965	0.0441507	0.101973	-0.2253	0.181366	-0.934157	1.12738		0.36458	0.513693	0.200532
	498.278	-0.999667		-0.130132	0.314149	0.0358986	0.102476	-0.189463	0.201118	-0.484984	1.14914		0.406953	0.515049	0.191624
	498.283	0.165333		-0.1163	0.314176	0.0262784	0.102859	-0.127521	0.221071	0.356081	1.15964		0.472453	0.516391	0.174028
	498.288	-0.189		-0.10167	0.314366	0.0154399	0.103476	-0.0435696	0.241388	0.849619	1.1564		0.504325	0.51772	0.154204
	498.293	-0.0163333		-0.0863298	0.314384	0.00358129	0.103959	0.0548908	0.261484	0.598956	1.1401		0.526239	0.519035	0.173287
	498.298	0.151667		-0.0703742	0.314581	-0.00904914	0.104672	0.157684	0.281645	-0.127275	1.11066		0.543614	0.520339	0.190179
	498.303	-1.404		-0.0539021	0.314594	-0.0221535	0.105256	0.253118	0.30134	-0.681453	1.06641		0.576605	0.52163	0.152411
	498.308	-0.0366667		-0.0370166	0.314798	-0.0353881	0.106048	0.329418	0.32083	-0.625655	1.00922		0.608095	0.522909	0.143748
	498.313	-0.122		-0.0198242	0.314811	-0.0483704	0.106734	0.376261	0.33974	-0.0817443	0.939672		0.592395	0.524177	0.173564
	498.318	1.564		-0.00243414	0.315021	-0.0606893	0.107591	0.386184	0.35818	0.435529	0.857562		0.553514	0.525434	0.212146
	498.323	1.74767		0.0150422	0.315037	-0.0719181	0.108383	0.35569	0.376017	0.505082	0.765863		0.544489	0.52668	0.240427
	498.328	0.953		0.032492	0.315252	-0.0816304	0.109296	0.285868	0.393148	0.149922	0.665429		0.616241	0.527916	0.201021
	498.333	0.066		0.0498021	0.315276	-0.0894177	0.110196	0.182441	0.409698	-0.243385	0.55716		0.711358	0.529141	0.191154
	498.338	0.362		0.0668591	0.315494	-0.0949083	0.11116	0.0552314	0.425362	-0.322555	0.445309		0.75545	0.530357	0.17915
	498.343	-1.287		0.0835505	0.315528	-0.0977865	0.112171	-0.0829152	0.440458	-0.0911321	0.333323		0.753374	0.531561	0.156659
	498.348	-1.04		0.0997656	0.315747	-0.0978099	0.113187	-0.217592	0.454573	0.143418	0.229569		0.706598	0.532756	0.141519
	498.353	-0.663333		0.115396	0.315794	-0.0948265	0.114308	-0.334501	0.46809	0.118827	0.161225		0.641468	0.53394	0.161428
	498.358	-1.4595		0.130336	0.316011	-0.0887873	0.115381	-0.421109	0.480615	-0.103324	0.175297		0.603929	0.535114	0.186663
	498.363	-0.502		0.144483	0.316072	-0.0797554	0.116611	-0.468087	0.492451	-0.219182	0.254544		0.612562	0.536277	0.178639
	498.368	-1.247		0.157742	0.316285	-0.0679115	0.11775	-0.470352	0.503351	-0.036795	0.352802		0.600152	0.537428	0.19492
	498.373	0.3275		0.170019	0.316361	-0.0535523	0.119083	-0.427599	0.513424	0.281577	0.453477		0.572298	0.538568	0.213116
	498.378	-0.0593333		0.181228	0.316567	-0.0370857	0.120296	-0.344269	0.522649	0.368979	0.548876		0.561561	0.539696	0.254402
	498.383	0.018		0.19129	0.316658	-0.0190189	0.121723	-0.22898	0.530897	0.0570355	0.635337		0.589364	0.540812	0.255795
	498.388	-0.526667		0.200132	0.316853	5.76409e-05	0.12302	-0.0935106	0.538373	-0.399393	0.712156		0.590317	0.541913	0.211888
	498.393	-1.25167		0.207689	0.316957	0.0194908	0.124529	0.0485269	0.544759	-0.544476	0.776607		0.589676	0.543001	0.184942
	498.398	0.389		0.213903	0.317139	0.038589	0.125916	0.183161	0.550406	-0.186975	0.827813		0.566795	0.544074	0.227957
	498.403	1.41733		0.218725	0.317256	0.0566495	0.127491	0.297507	0.554927	0.373354	0.866593		0.499374	0.545131	0.234829
	498.408	1.61467		0.222116	0.31742	0.072986	0.12897	0.381044	0.558691	0.613429	0.89115		0.457915	0.546171	0.219461
	498.413	1.11		0.224045	0.317547	0.0869573	0.130593	0.426574	0.561387	0.295913	0.901652		0.459902	0.547193	0.231313
	498.418	-0.083		0.224491	0.317691	0.0979942	0.132159	0.430822	0.563272	-0.289877	0.899301		0.466092	0.548197	0.237938
	498.423	0.049		0.223442	0.317825	0.105624	0.133812	0.3946	0.564231	-0.601563	0.883007		0.451444	0.54918	0.22867
	498.428	-0.236		0.220896	0.317945	0.109492	0.135455	0.322578	0.564324	-0.364224	0.854303		0.444907	0.550142	0.226452
	498.433	0.247333		0.216862	0.318083	0.109377	0.137119	0.222693	0.563682	0.173967	0.815174		0.462209	0.551082	0.23613
	498.438	-0.008		0.211358	0.318177	0.105203	0.138822	0.105272	0.562159	0.496711	0.765392		0.442109	0.551997	0.209939
	498.443	1.55		0.204412	0.318315	0.0970456	0.140479	-0.0180261	0.560091	0.324546	0.707273		0.428975	0.552887	0.195867
	498.448	0.230667		0.196061	0.318381	0.0851293	0.142222	-0.135356	0.557196	-0.132014	0.642787		0.453558	0.553751	0.199556
	498.453	-0.817		0.186352	0.318513	0.0698229	0.143858	-0.235807	0.553901	-0.410176	0.572133		0.483688	0.554586	0.208406
	498.458	-0.533926		0.175342	0.318548	0.0516262	0.145615	-0.310405	0.549914	-0.264525	0.49842		0.501122	0.555392	0.246788
	498.463	0.661667		0.163097	0.318671	0.0311527	0.14722	-0.352901	0.545601	0.112757	0.424232		0.480593	0.556166	0.238088
	498.468	0.397333		0.149689	0.318674	0.00910844	0.148966	-0.360291	0.54079	0.32468	0.350861		0.435011	0.556908	0.197714
	498.473	-1.348		0.135202	0.318783	-0.0137342	0.150534	-0.333014	0.535663	0.18419	0.282544		0.40169	0.557615	0.180075
	498.478	-1.00933		0.119724	0.318752	-0.036564	0.152247	-0.274819	0.530253	-0.125272	0.223611		0.409789	0.558287	0.187435
	498.483	-0.646		0.103352	0.318843	-0.0585605	0.153776	-0.192317	0.524507	-0.278776	0.178979		0.463216	0.558921	0.215038
	498.488	-0.354		0.0861901	0.318777	-0.0789238	0.155434	-0.0942604	0.518665	-0.150239	0.156962		0.512736	0.559517	0.22704
	498.493	-0.755333		0.0683458	0.318845	-0.096904	0.156928	0.00936296	0.512483	0.0936459	0.160519		0.533572	0.560072	0.209029
	498.498	1.1135		0.0499333	0.318743	-0.111828	0.158518	0.108336	0.506328	0.203131	0.180353		0.529334	0.560585	0.183951
	498.503	-0.147		0.0310705	0.318784	-0.123127	0.159983	0.193206	0.499888	0.100359	0.205159		0.551945	0.561054	0.15644
	498.508	-0.07		0.011879	0.318647	-0.130352	0.161498	0.256173	0.493527	-0.0793273	0.22896		0.601434	0.561479	0.168184
	498.513	0.275		-0.00751699	0.318657	-0.133199	0.162941	0.291767	0.48701	-0.157278	0.247325		0.664044	0.561857	0.172298
	498.518	-0.205667		-0.0269915	0.318485	-0.131513	0.164382	0.297279	0.480568	-0.0843265	0.258129		0.731468	0.562188	0.14715
	498.523	-0.02		-0.0464175	0.318459	-0.125304	0.165811	0.272901	0.474158	0.0457139	0.26212		0.755941	0.56247	0.128203
	498.528	-0.847		-0.0656676	0.318253	-0.114739	0.167185	0.221582	0.467804	0.111979	0.258169		0.741291	0.562701	0.143488
	498.533	-1.41867		-0.0846155	0.31819	-0.100147	0.168609	0.14865	0.461683	0.0722131	0.246091		0.680913	0.562881	0.158744
	498.538	-0.547		-0.103136	0.317952	-0.0820018	0.169929	0.061241	0.45562	-0.0266278	0.227875		0.620084	0.563009	0.20099
	498.543	-1.19633		-0.121107	0.317848	-0.0609141	0.171351	-0.0323898	0.44995	-0.106061	0.2034		0.580342	0.563083	0.197916
	498.548	-0.975667		-0.138409	0.317578	-0.0376067	0.172636	-0.123607	0.444387	-0.113577	0.1744		0.552594	0.563103	0.216796
	498.553	-0.698		-0.154927	0.317433	-0.0128928	0.174057	-0.204127	0.43929	-0.0465324	0.144546		0.532418	0.563067	0.231591
	498.558	-0.224		-0.170551	0.317134	0.0123517	0.175323	-0.266687	0.434389	0.0524471	0.116318		0.501905	0.562975	0.216176
	498.563	-0.357333		-0.185175	0.316945	0.037219	0.176742	-0.30562	0.42992	0.119049	0.097821		0.502577	0.562827	0.221153
	498.568	-0.573		-0.198703	0.316619	0.060801	0.178004	-0.317306	0.425749	0.104736	0.0978887		0.550513	0.562622	0.239679
	498.573	-0.831333		-0.211042	0.316386	0.082222	0.179414	-0.300471	0.421889	0.011528	0.116379		0.591714	0.562358	0.247747
	498.578	-1.08267		-0.222109	0.316036	0.100671	0.180685	-0.256318	0.418397	-0.102401	0.146874		0.584583	0.562037	0.22279
	498.583	-1.534		-0.23183	0.315759	0.115433	0.182074	-0.188478	0.41506	-0.157227	0.180551		0.587216	0.561658	0.224387
	498.588	-1.409		-0.240136	0.315387	0.125915	0.18336	-0.102764	0.412091	-0.106295	0.214237		0.643076	0.56122	0.211799
	498.593	-0.833		-0.246973	0.315068	0.131672	0.184716	-0.00673139	0.409141	0.0248402	0.24624		0.731333	0.560724	0.191007
	498.598	-0.736		-0.252291	0.314677	0.132424	0.186014	0.0909369	0.406477	0.144124	0.273938		0.766589	0.56017	0.188212
	498.603	-0.441		-0.256054	0.314316	0.12807	0.187325	0.181183	0.403756	0.151054	0.297688		0.729486	0.559558	0.177678
	498.608	-0.348		-0.258234	0.313909	0.118695	0.188626	0.255412	0.401178	0.0210918	0.316779		0.646149	0.558889	0.177981
	498.613	-0.148		-0.258815	0.313508	0.104572	0.189877	0.306325	0.398534	-0.148881	0.329753		0.538944	0.558164	0.18931
	498.618	-0.0105		-0.257791	0.313088	0.0861498	0.191167	0.328682	0.395865	-0.200308	0.337894		0.502615	0.557382	0.173334
	498.623	-0.562		-0.255167	0.312651	0.0640431	0.192347	0.319879	0.393168	-0.0607511	0.341161		0.530963	0.556545	0.175101
	498.628	-0.7145		-0.250957	0.312219	0.0390115	0.193606	0.280285	0.390298	0.154779	0.339295		0.549104	0.555654	0.192801
	498.633	-0.5695		-0.245189	0.311749	0.011932	0.194709	0.213278	0.387444	0.226408	0.334349		0.55312	0.55471	0.193779
	498.638	0.19		-0.237898	0.311309	-0.0162311	0.195915	0.124967	0.384325	0.0545845	0.326556		0.511354	0.553715	0.164217
	498.643	-0.8925		-0.229131	0.31081	-0.0444619	0.196938	0.0236119	0.381228	-0.205503	0.316005		0.439732	0.552668	0.18962
	498.648	-2.007		-0.218944	0.310363	-0.0717299	0.198071	-0.0811932	0.377843	-0.28126	0.304968		0.399225	0.551573	0.199091
	498.653	-1.0905		-0.207403	0.309838	-0.0970286	0.199015	-0.179492	0.374428	-0.0749916	0.294046		0.399595	0.550431	0.199011
	498.658	-0.576		-0.194584	0.309388	-0.119414	0.200059	-0.261982	0.370757	0.213331	0.283676		0.397013	0.549243	0.188231
	498.663	-0.495		-0.180569	0.308841	-0.138038	0.200929	-0.320959	0.366951	0.290438	0.275887		0.376201	0.548012	0.150163
	498.668	-0.04		-0.165451	0.308388	-0.152184	0.201871	-0.351091	0.362946	0.0823897	0.270445		0.357339	0.546738	0.163091
	498.673	-3.818		-0.149327	0.307824	-0.161294	0.202677	-0.349928	0.358677	-0.195341	0.266284		0.363722	0.545426	0.195637
	498.678	-0.6135		-0.132304	0.307371	-0.164987	0.203514	-0.318104	0.354256	-0.278197	0.263986		0.424954	0.544076	0.191934
	498.683	-0.81		-0.114492	0.306793	-0.163078	0.204266	-0.259205	0.349459	-0.119105	0.262426		0.496665	0.542691	0.164795
	498.688	0.11		-0.0960092	0.30634	-0.155584	0.205002	-0.179336	0.344527	0.102304	0.259892		0.550118	0.541274	0.178519
	498.693	-0.851		-0.0769756	0.305754	-0.142724	0.205712	-0.0864447	0.339156	0.192765	0.25659		0.558262	0.539827	0.192273
	498.698	-1.156		-0.057516	0.305301	-0.124912	0.206356	0.0105217	0.333626	0.118772	0.251126		0.542902	0.538352	0.218059
	498.703	1.071		-0.0377577	0.304711	-0.102743	0.207034	0.102526	0.327669	-0.0169208	0.241747		0.527655	0.536853	0.256418
	498.708	0.257		-0.0178299	0.304259	-0.0769711	0.207604	0.181316	0.321499	-0.107978	0.229149		0.528138	0.535332	0.26283
	498.713	-0.316		0.00213728	0.303667	-0.0484815	0.208258	0.240177	0.314984	-0.121264	0.212701		0.518165	0.533792	0.273092
	498.718	-0.603		0.0220137	0.303217	-0.0182611	0.208773	0.274499	0.308199	-0.0756933	0.191951		0.507478	0.532236	0.272523
	498.723	0.719		0.0416699	0.302627	0.0126382	0.209407	0.282112	0.301194	0.000807863	0.168897		0.495297	0.530666	0.259443
	498.728	0.322		0.0609781	0.302177	0.0431367	0.209887	0.263375	0.293889	0.0775303	0.144009		0.480258	0.529086	0.254172
	498.733	0.123		0.0798131	0.301593	0.0721646	0.210502	0.221031	0.286497	0.111708	0.119699		0.464348	0.5275	0.245652
	498.738	-0.189		0.0980533	0.301141	0.0987	0.210967	0.159862	0.278824	0.0672333	0.102627		0.452927	0.525909	0.23709
	498.743	0.3445		0.115581	0.300565	0.121805	0.211558	0.0861828	0.271176	-0.0433434	0.0993229		0.455173	0.524317	0.22709
	498.748	0.332		0.132283	0.300112	0.140656	0.212021	0.00723154	0.263319	-0.143905	0.115122		0.464779	0.522727	0.239005
	498.753	-0.082		0.148054	0.299545	0.154578	0.212581	-0.0694945	0.255558	-0.14381	0.145104		0.479284	0.521142	0.26118
	498.758	0.3295		0.162791	0.299088	0.163061	0.213048	-0.1369	0.247707	-0.023057	0.182152		0.49711	0.519565	0.24546
	498.763	0.348		0.176404	0.298531	0.165782	0.213569	-0.188909	0.23998	0.128447	0.223337		0.485846	0.518	0.256359
	498.768	0.1175		0.188804	0.29807	0.162616	0.21404	-0.220983	0.232309	0.175431	0.264809		0.444773	0.516449	0.246162
	498.773	1.724		0.199916	0.297524	0.153641	0.214509	-0.23052	0.224762	0.0625791	0.305115		0.400235	0.514916	0.237976
	498.778	-0.119		0.209671	0.297055	0.139132	0.214978	-0.217077	0.217419	-0.120742	0.343558		0.376424	0.513403	0.234816
	498.783	-1.516		0.21801	0.29652	0.119558	0.215386	-0.182413	0.210198	-0.212434	0.37767		0.380594	0.511913	0.248961
	498.788	1.432		0.224882	0.296042	0.0955654	0.215838	-0.13032	0.203312	-0.12532	0.407348		0.414705	0.510449	0.254283
	498.793	0.3995		0.230248	0.295516	0.0679532	0.216176	-0.0662618	0.196567	0.0710992	0.43226		0.455942	0.509014	0.263459
	498.798	-0.14		0.234078	0.295026	0.037651	0.216593	0.00316908	0.190256	0.210796	0.450681		0.483526	0.507611	0.26886
	498.803	-0.418		0.236352	0.294509	0.0056866	0.216858	0.0709193	0.184149	0.173299	0.463159		0.491636	0.506242	0.246376
	498.808	1.372		0.237063	0.294006	-0.0268481	0.217221	0.130208	0.178538	-0.0174784	0.4692		0.516834	0.50491	0.240616
	498.813	0.408		0.23621	0.293495	-0.0588337	0.217411	0.175238	0.173234	-0.212608	0.467483		0.546947	0.503617	0.229184
	498.818	-0.0645		0.233805	0.292976	-0.0891613	0.217702	0.201806	0.16846	-0.253883	0.4591		0.554423	0.502366	0.202453
	498.823	1.6685		0.229871	0.292469	-0.116771	0.217821	0.20772	0.16412	-0.0986564	0.443803		0.556524	0.501158	0.203817
	498.828	0.57		0.224439	0.291931	-0.140686	0.218027	0.19299	0.160317	0.13945	0.421239		0.596329	0.499997	0.172517
	498.833	1.4915		0.217551	0.291425	-0.160054	0.218082	0.159742	0.157078	0.273404	0.393135		0.62955	0.498883	0.189113
	498.838	0.621		0.209259	0.290868	-0.174168	0.218194	0.111887	0.154362	0.194209	0.359293		0.657736	0.497819	0.227473
	498.843	-0.5215		0.199622	0.290359	-0.182501	0.218195	0.0545934	0.152308	-0.0341265	0.32004		0.646284	0.496807	0.237002
	498.848	-0.5775		0.188709	0.28978	-0.184722	0.218212	-0.00636663	0.150748	-0.227631	0.277521		0.603789	0.495847	0.23401
	498.853	-1.273		0.176598	0.289265	-0.180712	0.218172	-0.065296	0.149896	-0.242854	0.232115		0.573597	0.494942	0.233773
	498.858	-0.394		0.163373	0.288662	-0.170569	0.218101	-0.117178	0.149499	-0.0957989	0.186386		0.593631	0.494092	0.232575
	498.863	-0.357		0.149126	0.288138	-0.154607	0.218031	-0.158137	0.149791	0.0728348	0.145462		0.610109	0.493299	0.241882
	498.868	0.865		0.133955	0.287511	-0.133351	0.217886	-0.1857	0.150501	0.142212	0.11628		0.574723	0.492564	0.218021
	498.873	0.389		0.117965	0.286973	-0.107513	0.217796	-0.198842	0.151822	0.11115	0.112264		0.527531	0.491886	0.209123
	498.878	0.854		0.101263	0.28632	-0.07798	0.217595	-0.197852	0.15353	0.0571433	0.1349		0.49575	0.491268	0.206479
	498.883	0.312		0.0839632	0.285765	-0.0457728	0.217493	-0.184049	0.155726	0.0222751	0.172675		0.51712	0.490709	0.204005
	498.888	-0.349		0.0661817	0.285086	-0.012018	0.217257	-0.159431	0.158287	-0.0270646	0.216452		0.521815	0.490209	0.216477
	498.893	0.381		0.048038	0.28451	0.0220941	0.217147	-0.126327	0.16119	-0.120464	0.259786		0.495594	0.489769	0.217749
	498.898	-0.296		0.0296531	0.283804	0.055352	0.216897	-0.0871038	0.164439	-0.197813	0.30108		0.458176	0.489388	0.185587
	498.903	-0.339		0.011149	0.283205	0.0865665	0.216777	-0.0439874	0.167882	-0.149421	0.338617		0.438739	0.489066	0.18584
	498.908	-0.1725		-0.00735165	0.282472	0.114615	0.216531	0.00100656	0.17164	0.0447297	0.370545		0.404433	0.488803	0.203902
	498.913	1.697		-0.0257272	0.281847	0.138481	0.216399	0.0460315	0.175468	0.246196	0.397353		0.370207	0.488598	0.203843
	498.918	0.902		-0.0438572	0.281088	0.157296	0.216167	0.0892984	0.179557	0.268276	0.417813		0.368921	0.488449	0.207663
	498.923	0.415		-0.0616235	0.280432	0.17037	0.216016	0.128945	0.183633	0.065996	0.431087		0.397319	0.488357	0.245326
	498.928	-0.254		-0.0789107	0.279648	0.177217	0.215804	0.162937	0.187889	-0.201093	0.438136		0.39932	0.488319	0.225496
	498.933	-0.213		-0.0956074	0.278961	0.177576	0.215625	0.189057	0.192103	-0.311313	0.4381		0.395358	0.488335	0.204775
	498.938	0.189		-0.111607	0.278152	0.171424	0.21543	0.205002	0.196399	-0.184665	0.43154		0.422693	0.488403	0.216948
	498.943	-0.127		-0.126806	0.277432	0.15897	0.215213	0.208595	0.20067	0.0576611	0.420217		0.458171	0.48852	0.215394
	498.948	0.378		-0.141111	0.2766	0.140659	0.215026	0.198109	0.204926	0.222634	0.404151		0.473402	0.488687	0.17233
	498.953	0.979		-0.15443	0.275846	0.117144	0.214763	0.172623	0.209205	0.214361	0.385628		0.494086	0.488899	0.182655
	498.958	0.041		-0.166682	0.274992	0.0892742	0.214569	0.132375	0.213397	0.0787193	0.367354		0.579935	0.489156	0.159357
	498.963	0.222		-0.177792	0.274204	0.0580527	0.214254	0.07902	0.217664	-0.0818431	0.351201		0.675382	0.489454	0.142522
	498.968	0.21		-0.187693	0.27333	0.0246061	0.214034	0.0157315	0.22181	-0.195719	0.341987		0.733189	0.489792	0.143826
	498.973	-0.0485		-0.196326	0.272508	-0.00985983	0.213665	-0.0529008	0.226061	-0.224458	0.342924		0.755944	0.490167	0.127277
	498.978	0.232		-0.203641	0.271616	-0.0441054	0.213401	-0.121198	0.230201	-0.132504	0.356058		0.768603	0.490575	0.104675
	498.983	-0.005		-0.2096	0.27076	-0.0769025	0.212979	-0.182919	0.234434	0.0800563	0.383177		0.764382	0.491016	0.123669
	498.988	-0.908		-0.214169	0.269853	-0.107081	0.212655	-0.231941	0.238597	0.303818	0.421695		0.726823	0.491484	0.136179
	498.993	-0.613		-0.217328	0.268965	-0.13357	0.212185	-0.262991	0.242796	0.341398	0.469566		0.670622	0.491978	0.151438
	498.998	-0.500667		-0.219065	0.268044	-0.155439	0.21179	-0.272346	0.246973	0.0815692	0.524365		0.58312	0.492494	0.150036
	499.003	-1.09833		-0.219378	0.267126	-0.171933	0.21128	-0.25837	0.251096	-0.328568	0.582251		0.507128	0.493029	0.189657
	499.008	-3.012		-0.218274	0.266195	-0.182492	0.21081	-0.221832	0.255226	-0.541954	0.641989		0.487123	0.493581	0.205802
	499.013	-0.404		-0.21577	0.265248	-0.186781	0.210271	-0.16592	0.259203	-0.315584	0.701457		0.516661	0.494144	0.228417
	499.018	-0.293333		-0.211892	0.264308	-0.184691	0.209729	-0.0959628	0.26318	0.218874	0.75838		0.530482	0.494717	0.247114
	499.023	0.825		-0.206676	0.263336	-0.176345	0.209171	-0.0188671	0.266921	0.619477	0.812592		0.497791	0.495295	0.231163
	499.028	0.053		-0.200166	0.26239	-0.162094	0.208567	0.0576406	0.27061	0.516469	0.862195		0.461786	0.495876	0.233185
	499.033	0.491		-0.192415	0.261397	-0.142496	0.208001	0.125879	0.274018	-0.0379957	0.90582		0.429497	0.496455	0.239831
	499.038	-1.30433		-0.183484	0.260447	-0.1183	0.20735	0.179071	0.277287	-0.591888	0.943606		0.396433	0.49703	0.229487
	499.043	-0.880333		-0.173442	0.259434	-0.0904126	0.206785	0.212086	0.280274	-0.676988	0.973902		0.391902	0.497596	0.195308
	499.048	0.24		-0.162363	0.258482	-0.0598645	0.206107	0.221978	0.283021	-0.211432	0.996421		0.400237	0.49815	0.207929
	499.053	0.541		-0.15033	0.257456	-0.0277729	0.205548	0.208268	0.285515	0.428007	1.01174		0.386985	0.498689	0.213155
	499.058	-0.208		-0.137432	0.256503	0.00470042	0.204864	0.172938	0.287682	0.717704	1.01863		0.374563	0.49921	0.220992
	499.063	0.954333		-0.123761	0.255466	0.0363913	0.204311	0.120157	0.289636	0.418589	1.01755		0.379942	0.499708	0.239182
	499.068	-0.311		-0.109416	0.254515	0.0661751	0.203639	0.0557861	0.291208	-0.225472	1.00898		0.382653	0.50018	0.261245
	499.073	-0.802		-0.0944985	0.253471	0.0930065	0.203091	-0.0132795	0.29259	-0.685117	0.992028		0.352089	0.500623	0.218435
	499.078	-0.831		-0.079113	0.252523	0.115956	0.202446	-0.0798419	0.293578	-0.583392	0.967879		0.337453	0.501035	0.2023
	499.083	-0.85		-0.0633672	0.251476	0.134244	0.201897	-0.137135	0.294366	-0.0131484	0.937213		0.347445	0.501411	0.215781
	499.088	1.482		-0.0473702	0.250532	0.147262	0.201285	-0.179483	0.294781	0.541886	0.899778		0.339972	0.501748	0.215166
	499.093	0.81		-0.0312317	0.249486	0.154601	0.200728	-0.202829	0.294946	0.623597	0.857311		0.333437	0.502044	0.197253
	499.098	0.156		-0.0150618	0.248546	0.156057	0.20015	-0.205083	0.294777	0.189888	0.810195		0.352485	0.502295	0.193753
	499.103	-0.575667		0.00103017	0.247505	0.151641	0.199575	-0.186278	0.294278	-0.367674	0.758454		0.37098	0.502499	0.194342
	499.108	-0.428		0.0169363	0.24657	0.141576	0.199023	-0.148517	0.293478	-0.583839	0.703927		0.381668	0.502654	0.189013
	499.113	0.212		0.0325509	0.245536	0.126287	0.198423	-0.0957313	0.292259	-0.318542	0.646748		0.414089	0.502755	0.197764
	499.118	-0.702667		0.0477709	0.244606	0.106386	0.197885	-0.0332751	0.290747	0.15871	0.587518		0.434494	0.502802	0.185222
	499.123	1.69433		0.0624972	0.243582	0.0826477	0.197251	0.0326101	0.288744	0.440724	0.528068		0.432278	0.502792	0.190381
	499.128	0.312		0.0766344	0.242658	0.0559821	0.196709	0.0954021	0.286423	0.33461	0.468119		0.446066	0.502723	0.183443
	499.133	0.427		0.0900923	0.241647	0.0274002	0.196039	0.148927	0.283575	-0.0141174	0.408446		0.475907	0.502592	0.199004
	499.138	0.319667		0.102786	0.240727	-0.00202242	0.195474	0.187953	0.280358	-0.292699	0.350217		0.481768	0.502398	0.213951
	499.143	0.523667		0.114636	0.23973	-0.0311855	0.194767	0.208685	0.276625	-0.298566	0.292755		0.468134	0.50214	0.221397
	499.148	-0.140667		0.125571	0.238814	-0.059004	0.194163	0.209128	0.272461	-0.0813085	0.237304		0.458631	0.501815	0.212129
	499.153	0.609		0.135524	0.237832	-0.0844482	0.193421	0.189268	0.267831	0.141314	0.184794		0.476578	0.501423	0.218207
	499.158	0.738		0.144438	0.236919	-0.106582	0.192764	0.151059	0.262722	0.189775	0.135679		0.534031	0.500963	0.2201
	499.163	0.163		0.152261	0.235953	-0.124596	0.191995	0.098217	0.257219	0.0663411	0.0948219		0.601763	0.500434	0.210176
	499.168	0.596667		0.158951	0.235042	-0.137841	0.191278	0.0358388	0.251219	-0.0765335	0.0718984		0.64314	0.499834	0.183947
	499.173	0.051		0.164472	0.234092	-0.145849	0.190489	-0.0301143	0.244901	-0.098518	0.081203		0.644024	0.499164	0.184482
	499.178	-0.713333		0.168799	0.233181	-0.148354	0.189713	-0.0934155	0.23811	-0.0065024	0.11356		0.606604	0.498423	0.201639
	499.183	0.1435		0.171913	0.232246	-0.1453	0.188915	-0.148192	0.231056	0.0670405	0.153426		0.572201	0.497611	0.223696
	499.188	-0.310333		0.173804	0.231334	-0.136845	0.188087	-0.189498	0.223593	0.0178734	0.195925		0.538156	0.496728	0.224865
	499.193	-0.242		0.174472	0.230413	-0.123354	0.18729	-0.21379	0.215894	-0.10638	0.237726		0.502381	0.495775	0.219008
	499.198	-0.474667		0.173922	0.229499	-0.105388	0.186423	-0.219247	0.207875	-0.150634	0.278344		0.455617	0.494751	0.204435
	499.203	-0.4455		0.172171	0.228591	-0.0836793	0.185634	-0.205908	0.199618	-0.0264636	0.317379		0.411821	0.493659	0.199336
	499.208	0.890333		0.169241	0.227671	-0.059106	0.184747	-0.175619	0.191137	0.169976	0.353196		0.386524	0.492498	0.198802
	499.213	0.582		0.165164	0.226774	-0.0326567	0.183973	-0.131791	0.182401	0.235659	0.386044		0.393502	0.491269	0.200089
	499.218	-1.02467		0.159978	0.225849	-0.0053923	0.183085	-0.0790063	0.17352	0.0696713	0.414913		0.417951	0.489975	0.218968
	499.223	0.4785		0.153728	0.224959	0.0215954	0.182328	-0.0225071	0.164372	-0.200644	0.438263		0.44951	0.488615	0.23169
	499.228	-0.494333		0.146468	0.224026	0.0472272	0.181459	0.0323674	0.155132	-0.321607	0.456311		0.455537	0.487193	0.248775
	499.233	0.233		0.138256	0.223142	0.0704794	0.180717	0.0807374	0.145638	-0.159464	0.467753		0.445234	0.48571	0.26251
	499.238	-0.340667		0.129156	0.2222	0.0904244	0.179882	0.118669	0.136075	0.152365	0.471685		0.399761	0.484168	0.244075
	499.243	0.8735		0.11924	0.221318	0.106269	0.179152	0.143537	0.126308	0.326352	0.468591		0.351425	0.48257	0.205224
	499.248	1.79633		0.108581	0.220366	0.117384	0.17836	0.154222	0.116476	0.197695	0.457211		0.334843	0.480917	0.191303
	499.253	-0.254		0.0972593	0.219483	0.123335	0.177634	0.151122	0.106529	-0.109056	0.437202		0.367406	0.479212	0.180806
	499.258	-0.515		0.0853581	0.218519	0.123895	0.176887	0.135989	0.0965224	-0.299708	0.409185		0.412973	0.477458	0.181941
	499.263	0.3405		0.0729634	0.217632	0.119055	0.176158	0.111599	0.0865142	-0.202809	0.37236		0.448936	0.475658	0.216272
	499.268	0.430333		0.060164	0.216657	0.109029	0.175452	0.0813284	0.0764714	0.0628901	0.327614		0.473497	0.473815	0.242306
	499.273	0.083		0.0470504	0.215763	0.0942404	0.174712	0.0486783	0.0665504	0.219064	0.276923		0.515554	0.471932	0.243782
	499.278	0.0403333		0.0337146	0.214775	0.0753084	0.174033	0.016833	0.0566538	0.119825	0.222081		0.578728	0.470013	0.25671
	499.283	-0.2015		0.020249	0.21387	0.0530217	0.173275	-0.0116951	0.0469947	-0.100821	0.169628		0.602837	0.46806	0.25817
	499.288	-0.252333		0.00674622	0.212869	0.0283072	0.172609	-0.0352795	0.0374656	-0.180552	0.136044		0.560059	0.466077	0.231397
	499.293	-0.504		-0.00670196	0.211952	0.00219168	0.17183	-0.0532302	0.0282859	-0.0197675	0.146544		0.496969	0.464069	0.224714
	499.298	-0.421		-0.020005	0.210938	-0.0242395	0.171158	-0.0656861	0.0194464	0.197701	0.200861		0.494874	0.462038	0.207976
	499.303	-0.306		-0.033074	0.210006	-0.0498872	0.170356	-0.0733826	0.0113123	0.193248	0.278111		0.520794	0.459989	0.214643
	499.308	0.1		-0.0458229	0.208979	-0.0736838	0.169661	-0.0773484	0.00569674	-0.0924121	0.365685		0.538758	0.457926	0.225552
	499.313	0.451		-0.0581685	0.20803	-0.0946368	0.168839	-0.0785995	0.00853069	-0.391991	0.457087		0.547153	0.455852	0.219255
	499.318	-0.782333		-0.0700309	0.206991	-0.11187	0.168107	-0.0778917	0.0151987	-0.353613	0.549937		0.547955	0.453771	0.192497
	499.323	0.4375		-0.0813348	0.206023	-0.12466	0.167271	-0.0755809	0.0220938	0.0829589	0.642317		0.532889	0.451688	0.199834
	499.328	1.64233		-0.092009	0.204973	-0.132467	0.166496	-0.0716142	0.0286664	0.559947	0.731733		0.526523	0.449607	0.207729
	499.333	-0.992		-0.101988	0.203986	-0.134954	0.165655	-0.0656431	0.0349166	0.596044	0.817503		0.535101	0.447531	0.237386
	499.338	-0.781667		-0.11121	0.202926	-0.132007	0.164836	-0.057226	0.0406549	0.0583204	0.898228		0.50676	0.445466	0.243358
	499.343	-1.56833		-0.119621	0.201919	-0.123734	0.163998	-0.0460654	0.0460125	-0.644103	0.971884		0.461717	0.443415	0.237043
	499.348	-2.02533		-0.127173	0.20085	-0.110466	0.163142	-0.0322189	0.0508233	-0.876067	1.03834		0.452166	0.441382	0.232092
	499.353	-1.311		-0.133823	0.199823	-0.0927422	0.162319	-0.0162316	0.0552039	-0.355615	1.09668		0.468034	0.439371	0.267977
	499.358	0.778		-0.139535	0.198747	-0.0712856	0.161439	0.000845852	0.0590423	0.53437	1.14576		0.441014	0.437388	0.253374
	499.363	0.914667		-0.144282	0.197702	-0.0469777	0.160639	0.0175601	0.0623832	1.0301	1.18623		0.380905	0.435434	0.222472
	499.368	1.41167		-0.14804	0.196621	-0.0208203	0.159754	0.032261	0.0651966	0.656701	1.21745		0.365197	0.433516	0.219356
	499.373	-0.667		-0.150795	0.195557	0.00610512	0.158985	0.0433685	0.0674345	-0.312286	1.23889		0.390885	0.431636	0.232301
	499.378	-0.574		-0.152539	0.194473	0.0326815	0.158117	0.0496452	0.069151	-1.05346	1.25164		0.374865	0.429799	0.223085
	499.383	-0.872		-0.153273	0.193394	0.0578022	0.157382	0.0504224	0.0702202	-0.910236	1.25552		0.349421	0.428007	0.205394
	499.388	-1.47367		-0.153003	0.192309	0.0804168	0.156549	0.045734	0.0707562	0.00947466	1.25093		0.32916	0.426266	0.207073
	499.393	1.953		-0.151741	0.191216	0.0995743	0.155849	0.0363348	0.0705967	0.912417	1.23958		0.314662	0.424579	0.203825
	499.398	1.322		-0.149509	0.190133	0.114462	0.15507	0.0236027	0.0698756	1.02017	1.22161		0.33386	0.422949	0.20832
	499.403	-1.253		-0.146334	0.189029	0.124441	0.154403	0.00934294	0.0684474	0.256356	1.19786		0.370864	0.421379	0.224115
	499.408	-0.359		-0.142248	0.18795	0.129071	0.153688	-0.0044685	0.0664239	-0.70135	1.17008		0.383728	0.419873	0.214039
	499.413	-1.361		-0.137291	0.186838	0.128128	0.153049	-0.0159608	0.063724	-1.03524	1.13847		0.3764	0.418433	0.182248
	499.418	-1.211		-0.131508	0.185765	0.121619	0.152403	-0.0236203	0.060409	-0.49687	1.10444		0.382579	0.417064	0.20529
	499.423	1.793		-0.124951	0.184649	0.109776	0.151785	-0.0264858	0.0564912	0.414279	1.0699		0.378289	0.415767	0.217035
	499.428	-0.72		-0.117673	0.183585	0.0930515	0.151204	-0.0242641	0.0519791	0.921546	1.03517		0.372337	0.414546	0.211321
	499.433	1.802		-0.109737	0.182469	0.0720997	0.150602	-0.0173583	0.0469906	0.639123	1.00187		0.38662	0.413402	0.197655
	499.438	-0.822		-0.101205	0.181415	0.0477484	0.150076	-0.00681224	0.0415184	-0.142602	0.971476		0.41619	0.412338	0.229201
	499.443	-0.2785		-0.0921453	0.180302	0.0209674	0.149485	0.00581748	0.0358166	-0.755148	0.944063		0.400139	0.411357	0.22099
	499.448	-1.306		-0.0826297	0.179262	-0.00717123	0.148998	0.0186422	0.0300034	-0.726703	0.92132		0.374831	0.410459	0.198327
	499.453	-1.346		-0.0727312	0.178156	-0.0355371	0.148416	0.029655	0.0247022	-0.134754	0.904189		0.379139	0.409648	0.196968
	499.458	1.076		-0.0625255	0.177131	-0.0629872	0.147953	0.036956	0.0207417	0.515942	0.892548		0.368926	0.408924	0.186396
	499.463	0.473		-0.0520896	0.176037	-0.0884123	0.14738	0.0389682	0.0197891	0.725707	0.887633		0.365953	0.408288	0.184872
	499.468	-1.1955		-0.0415014	0.175028	-0.110783	0.146925	0.0346244	0.022643	0.366575	0.889046		0.366694	0.407742	0.204649
	499.473	-0.9855		-0.030839	0.173949	-0.129189	0.146365	0.0235077	0.0286858	-0.267492	0.895807		0.375725	0.407288	0.211149
	499.478	0.6505		-0.0201804	0.172958	-0.142882	0.145906	0.00593062	0.0365767	-0.70151	0.908082		0.381808	0.406924	0.224964
	499.483	-0.834		-0.00960271	0.171898	-0.1513	0.145367	-0.0170571	0.0456976	-0.612293	0.924229		0.389186	0.406653	0.234918
	499.488	0.095		0.000818371	0.170926	-0.154092	0.144897	-0.0437349	0.0555332	-0.0490252	0.943053		0.401938	0.406474	0.21456
	499.493	-1.099		0.0110091	0.169888	-0.151133	0.144389	-0.0718484	0.0660196	0.584288	0.964224		0.405631	0.406387	0.204237
	499.498	2.035		0.0208982	0.168936	-0.142531	0.143912	-0.0988039	0.0769123	0.796999	0.985699		0.403391	0.406392	0.188271
	499.503	-0.1465		0.0304174	0.167923	-0.128615	0.143445	-0.121902	0.0882532	0.383605	1.00661		0.404624	0.406489	0.184478
	499.508	-1.3355		0.0395019	0.166992	-0.10993	0.142969	-0.138583	0.0998902	-0.376458	1.02645		0.402186	0.406677	0.204707
	499.513	-1.723		0.0480909	0.166007	-0.0872076	0.142555	-0.146667	0.111846	-0.895428	1.04349		0.399117	0.406956	0.220039
	499.518	-1.2665		0.0561279	0.165096	-0.0613378	0.142097	-0.144556	0.124041	-0.737004	1.05784		0.425563	0.407324	0.25248
	499.523	2.108		0.0635612	0.16414	-0.0333334	0.141746	-0.131392	0.136434	0.0104913	1.06954		0.441091	0.40778	0.26014
	499.528	0.313		0.0703441	0.16325	-0.00428688	0.141326	-0.107153	0.149014	0.778825	1.07795		0.437159	0.408322	0.247327
	499.533	1.513		0.0764355	0.162325	0.0246739	0.141045	-0.0726961	0.161672	0.963435	1.08431		0.420452	0.40895	0.238759
	499.538	1.643		0.0818	0.161456	0.0524312	0.140686	-0.0297329	0.174453	0.404711	1.08904		0.414737	0.409661	0.25536
	499.543	-0.0645		0.0864078	0.160562	0.0779229	0.140479	0.0192402	0.187196	-0.481614	1.09233		0.373439	0.410454	0.237632
	499.548	-0.9625		0.0902355	0.159713	0.100184	0.140202	0.071067	0.199975	-1.02248	1.09607		0.336164	0.411325	0.219015
	499.553	-0.978		0.0932659	0.158851	0.118386	0.140071	0.122101	0.212617	-0.801436	1.10067		0.354765	0.412272	0.22776
	499.558	1.65		0.095488	0.15802	0.131868	0.139892	0.168423	0.22519	0.0231402	1.10692		0.372786	0.413294	0.26683
	499.563	1.439		0.0968971	0.157189	0.140159	0.139834	0.206097	0.237553	0.833273	1.11636		0.356148	0.414387	0.252839
	499.568	1.397		0.0974949	0.156376	0.142998	0.139764	0.23147	0.249733	1.01499	1.12847		0.34381	0.415547	0.238776
	499.573	1.768		0.0972893	0.155576	0.140339	0.139774	0.241491	0.261655	0.425392	1.1433		0.357719	0.416774	0.239373
	499.578	0.604		0.0962942	0.15478	0.132349	0.139815	0.234032	0.27329	-0.491311	1.16068		0.353749	0.418062	0.228605
	499.583	-1.117		0.0945295	0.154008	0.119401	0.139887	0.208179	0.284639	-1.03608	1.17857		0.339664	0.419408	0.211973
	499.588	-1.042		0.0920209	0.153227	0.102051	0.140032	0.16446	0.295616	-0.7909	1.19618		0.360949	0.420809	0.224263
	499.593	1.897		0.0887996	0.152482	0.0810129	0.140161	0.104969	0.30629	0.052396	1.21209		0.402907	0.422262	0.243038
	499.598	1.012		0.0849018	0.151715	0.0571304	0.140398	0.0333445	0.316537	0.834034	1.22386		0.420534	0.423762	0.240235
	499.603	1.319		0.0803686	0.150994	0.031337	0.140578	-0.045396	0.326461	0.94199	1.23066		0.441875	0.425306	0.237304
	499.608	1.696		0.0752456	0.15024	0.00461873	0.14089	-0.125194	0.335934	0.302778	1.23071		0.462912	0.42689	0.263473
	499.613	-0.706		0.0695825	0.149541	-0.0220263	0.141119	-0.199426	0.345052	-0.55276	1.22202		0.461775	0.42851	0.280245
	499.618	-0.6705		0.0634325	0.148799	-0.0476271	0.141487	-0.261487	0.353716	-0.922727	1.20437		0.419066	0.430161	0.238177
	499.623	-1.614		0.056852	0.148118	-0.0712764	0.141766	-0.305427	0.361978	-0.523184	1.17661		0.408557	0.431839	0.220067
	499.628	-1.2645		0.0499002	0.147386	-0.0921639	0.142174	-0.326568	0.369792	0.270657	1.13819		0.424875	0.43354	0.216359
	499.633	1.526		0.0426384	0.146721	-0.109605	0.142506	-0.322041	0.377144	0.758952	1.09011		0.440813	0.435261	0.211789
	499.638	0.437		0.0351296	0.145999	-0.12306	0.142942	-0.291171	0.38405	0.543021	1.03228		0.45063	0.436996	0.212929
	499.643	0.362		0.027438	0.145347	-0.132153	0.143332	-0.235671	0.390432	-0.127307	0.965422		0.452564	0.438741	0.208652
	499.648	-1.085		0.0196284	0.144633	-0.136679	0.14379	-0.159593	0.396355	-0.610056	0.891525		0.442688	0.440492	0.204318
	499.653	0.7935		0.0117659	0.143992	-0.136602	0.144246	-0.0690516	0.401701	-0.48421	0.811639		0.439253	0.442244	0.205797
	499.658	0.3175		0.00391497	0.143286	-0.132052	0.144729	0.0282774	0.406559	0.0715809	0.728046		0.472592	0.443994	0.18177
	499.663	0.4575		-0.00386053	0.142652	-0.123316	0.145259	0.123841	0.410808	0.48983	0.644296		0.521763	0.445736	0.172632
	499.668	0.394		-0.0114982	0.141954	-0.110814	0.145775	0.209011	0.414531	0.385345	0.563116		0.551965	0.447467	0.186038
	499.673	0.107		-0.0189376	0.141326	-0.0950872	0.146385	0.275926	0.417639	-0.0873589	0.488519		0.548536	0.449182	0.19238
	499.678	0.164		-0.0261203	0.140636	-0.0767645	0.146949	0.318286	0.420182	-0.429491	0.425893		0.545057	0.450878	0.184978
	499.683	-0.105		-0.0329908	0.140012	-0.0565429	0.147644	0.332018	0.422134	-0.320617	0.379808		0.553894	0.452549	0.21438
	499.688	1.532		-0.0394967	0.13933	-0.0351579	0.148274	0.315723	0.423496	0.0759386	0.354068		0.528317	0.454193	0.222409
	499.693	1.574		-0.0455891	0.138707	-0.0133572	0.149056	0.270862	0.424311	0.324556	0.349624		0.478496	0.455805	0.204988
	499.698	1.628		-0.0512227	0.138034	0.00812473	0.149769	0.20163	0.424536	0.196779	0.36177		0.478049	0.457381	0.200939
	499.703	1.3865		-0.0563567	0.137414	0.0285899	0.150636	0.114552	0.42427	-0.105673	0.383072		0.511441	0.458918	0.231973
	499.708	-0.311		-0.0609544	0.13675	0.0473978	0.151447	0.0178228	0.423442	-0.215102	0.407851		0.524003	0.460412	0.229177
	499.713	-0.727		-0.064984	0.136131	0.0639827	0.152395	-0.0795356	0.422179	-0.0328958	0.431938		0.505787	0.461859	0.215361
	499.718	0.341		-0.0684184	0.135478	0.0778683	0.153314	-0.168585	0.420408	0.170448	0.452379		0.48409	0.463257	0.210303
	499.723	0.796		-0.0712355	0.134861	0.0886778	0.154335	-0.241361	0.418247	0.102332	0.468863		0.458398	0.464601	0.182275
	499.728	-1.3455		-0.0734184	0.134221	0.0961415	0.155363	-0.291635	0.415651	-0.176885	0.481936		0.438685	0.46589	0.164091
	499.733	-1.504		-0.0749553	0.133606	0.1001	0.156448	-0.315466	0.412695	-0.310181	0.492128		0.448097	0.46712	0.183446
	499.738	1.3835		-0.0758397	0.13298	0.100507	0.15758	-0.311493	0.409379	-0.078108	0.50188		0.460564	0.468289	0.215558
	499.743	1.031		-0.0760702	0.132369	0.0974216	0.15872	-0.280953	0.405721	0.305596	0.514049		0.448743	0.469393	0.212247
	499.748	1.38		-0.0756508	0.13176	0.0910105	0.159942	-0.227436	0.401771	0.406857	0.530229		0.428048	0.470431	0.197744
	499.753	1.149		-0.0745905	0.131155	0.0815355	0.161127	-0.156438	0.397489	0.0675474	0.552165		0.432042	0.471401	0.208468
	499.758	0.902		-0.0729031	0.130564	0.0693462	0.162423	-0.0747516	0.392965	-0.384265	0.580773		0.423179	0.4723	0.212895
	499.763	-1.8335		-0.0706074	0.129968	0.0548685	0.163646	0.0102089	0.388124	-0.467249	0.614729		0.409935	0.473128	0.188944
	499.768	1.297		-0.067727	0.129398	0.0385922	0.164994	0.0910987	0.383071	-0.0690488	0.652654		0.42378	0.473882	0.176429
	499.773	0.891		-0.0642895	0.128813	0.0210568	0.166249	0.161276	0.377726	0.41345	0.693117		0.45526	0.474561	0.183244
	499.778	0.059		-0.0603271	0.128266	0.00283608	0.167629	0.215335	0.372185	0.476368	0.73305		0.478254	0.475164	0.199188
	499.783	1.186		-0.0558756	0.127697	-0.0154774	0.168913	0.249496	0.366395	0.0342977	0.769881		0.486736	0.475691	0.207672
	499.788	0.081		-0.0509745	0.127176	-0.0332893	0.170306	0.26184	0.360419	-0.479309	0.801823		0.496684	0.47614	0.225392
	499.793	1.307		-0.0456665	0.126625	-0.0500209	0.17162	0.252365	0.354251	-0.543013	0.826137		0.508311	0.476512	0.226922
	499.798	1.181		-0.0399973	0.126131	-0.0651255	0.173012	0.22288	0.347912	-0.0723924	0.84122		0.487049	0.476806	0.205113
	499.803	1.5335		-0.034015	0.125603	-0.0781058	0.174358	0.176747	0.341452	0.490044	0.846582		0.452196	0.477022	0.188325
	499.808	1.3395		-0.02777	0.12514	-0.0885295	0.175744	0.118496	0.334848	0.607564	0.840758		0.446871	0.477161	0.197378
	499.813	1.2395		-0.0213145	0.124637	-0.0960438	0.177124	0.0533619	0.328193	0.168783	0.823436		0.432631	0.477222	0.211159
	499.818	-0.6145		-0.014702	0.124206	-0.100388	0.178502	-0.0132077	0.32144	-0.418686	0.795249		0.389456	0.477208	0.194279
	499.823	-2.839		-0.00798679	0.123734	-0.101406	0.17992	-0.0760353	0.3147	-0.633698	0.755984		0.37274	0.477118	0.189904
	499.828	0.822		-0.00122405	0.123337	-0.0990485	0.181297	-0.130624	0.307918	-0.323855	0.707003		0.409315	0.476954	0.176067
	499.833	1.584		0.00553112	0.122899	-0.0933838	0.182755	-0.173465	0.3012	0.200306	0.650499		0.437133	0.476718	0.199572
	499.838	-0.1805		0.0122238	0.122537	-0.0845935	0.184142	-0.20222	0.294503	0.499008	0.587904		0.443013	0.476411	0.227901
	499.843	1.434		0.0187998	0.122135	-0.0729708	0.185641	-0.215776	0.287899	0.390501	0.522505		0.4366	0.476035	0.226618
	499.848	0.486		0.025206	0.12181	-0.0589125	0.187051	-0.214176	0.281376	0.0357332	0.458171		0.45527	0.475592	0.240514
	499.853	0.326		0.0313905	0.121448	-0.0429075	0.188589	-0.198471	0.274955	-0.275266	0.39875		0.465252	0.475084	0.23374
	499.858	-0.286		0.0373036	0.121161	-0.0255212	0.190037	-0.170511	0.26866	-0.363973	0.350794		0.454016	0.474514	0.20907
This study	499.863	0.377		0.0428976	0.120841	-0.00737686	0.19161	-0.132719	0.262463	-0.231512	0.320154		0.438505	0.473884	0.184889
	499.868	-1.201		0.0481272	0.120591	0.0108663	0.193105	-0.0878807	0.256416	0.0115768	0.310126		0.440473	0.473198	0.192193
	499.873	0.8255		0.0529501	0.120315	0.0285366	0.194707	-0.0389641	0.250453	0.224793	0.320023		0.443018	0.472459	0.206635
	499.878	1.0725		0.0573272	0.120103	0.0449748	0.196256	0.0110226	0.244644	0.285961	0.342643		0.430609	0.471669	0.183447
	499.883	0.3735		0.0612225	0.119871	0.0595589	0.197878	0.0591364	0.238905	0.148284	0.370708		0.436512	0.470832	0.199373
	499.888	0.87		0.064604	0.119696	0.0717291	0.199483	0.102584	0.233304	-0.102837	0.398246		0.439498	0.469951	0.220631
	499.893	0.2915		0.0674434	0.119511	0.0810093	0.201116	0.138801	0.227767	-0.277277	0.419998		0.424319	0.469031	0.205358
	499.898	-0.2395		0.0697164	0.119372	0.0870275	0.202769	0.165544	0.222341	-0.225354	0.433782		0.398191	0.468075	0.188433
	499.903	0.6945		0.0714033	0.119231	0.0895309	0.204403	0.181	0.216985	0.0124995	0.437906		0.399897	0.467087	0.213582
	499.908	-0.0605		0.0724883	0.119127	0.0883981	0.206092	0.183922	0.211712	0.219073	0.431061		0.40911	0.466071	0.225568
	499.913	0.584601		0.0729603	0.119031	0.083645	0.207719	0.173765	0.206526	0.199975	0.41399		0.399198	0.465031	0.221257
	499.918	1.00922		0.0728129	0.11896	0.0754258	0.209427	0.150824	0.201405	-0.0173691	0.386988		0.410768	0.463972	0.222898
	499.923	0.179708		0.0720439	0.118906	0.0640291	0.211039	0.116315	0.196394	-0.203643	0.350703		0.432028	0.462898	0.223465
	499.928	-0.507428		0.0706561	0.118867	0.0498673	0.212747	0.0724073	0.191446	-0.166245	0.307718		0.453321	0.461813	0.229773
	499.933	0.935918		0.0686565	0.118853	0.0334622	0.214339	0.0221461	0.186635	0.0422583	0.2607		0.485173	0.460722	0.229875
	499.938	0.840466		0.0660568	0.118843	0.0154257	0.216027	-0.0307206	0.181902	0.18218	0.21412		0.518756	0.459629	0.217817
	499.943	0.117604		0.0628732	0.118866	-0.00356366	0.217595	-0.0820242	0.177327	0.0972424	0.176795		0.561923	0.458539	0.206335
	499.948	-0.120821		0.059126	0.118883	-0.0227859	0.219246	-0.127539	0.17286	-0.106791	0.160468		0.565335	0.457457	0.213721
	499.953	-0.161284		0.0548397	0.11894	-0.0415077	0.220789	-0.163394	0.168567	-0.186193	0.172399		0.511956	0.456387	0.187562
	499.958	-1.32362		0.0500428	0.118982	-0.0590102	0.222389	-0.186479	0.164419	-0.0466701	0.206634		0.465445	0.455334	0.198425
	499.963	0.602231		0.0447677	0.119069	-0.0746167	0.223909	-0.194796	0.160451	0.143969	0.251608		0.453397	0.454302	0.194096
	499.968	-0.495988		0.0390502	0.119133	-0.0877186	0.225448	-0.187698	0.156666	0.154901	0.298143		0.45132	0.453296	0.212441
	499.973	0.329216		0.0329294	0.119247	-0.0977991	0.226947	-0.165979	0.15306	-0.0312343	0.341028		0.460683	0.452321	0.22179
	499.978	-1.77412		0.0264474	0.11933	-0.104453	0.228424	-0.131803	0.149667	-0.194621	0.377686		0.446706	0.45138	0.204276
	499.983	-0.332205		0.019649	0.119467	-0.107401	0.229903	-0.0884642	0.146452	-0.137697	0.405574		0.438145	0.450479	0.187339
	499.988	0.583909		0.0125816	0.119566	-0.106503	0.231322	-0.0400263	0.143472	0.079062	0.423489		0.435227	0.449622	0.170065
	499.993	0.913576		0.00529449	0.119723	-0.101761	0.232783	0.00912779	0.140673	0.203774	0.431679		0.436847	0.448812	0.173302
	499.998	-0.896174		-0.00216132	0.119837	-0.0933217	0.234153	0.0547628	0.138123	0.0852477	0.429749		0.447315	0.448055	0.198994
	500.003	0.587196		-0.00973337	0.120008	-0.0814695	0.235597	0.093218	0.135768	-0.14792	0.418349		0.47158	0.447354	0.223795
	500.008	0.177722		-0.0173682	0.120135	-0.0666171	0.236928	0.12174	0.133674	-0.228026	0.399695		0.495562	0.446713	0.248236
	500.013	-0.4344		-0.0250118	0.120317	-0.0492912	0.238354	0.138685	0.131805	-0.0514949	0.375978		0.508431	0.446135	0.248513
	500.018	0.0731871		-0.0326097	0.120455	-0.030113	0.239661	0.143572	0.130211	0.195163	0.351251		0.503432	0.445626	0.230217
	500.023	0.31797		-0.0401078	0.120646	-0.00977668	0.241065	0.137006	0.128888	0.231802	0.331924		0.47938	0.445187	0.21717
	500.028	-0.239535		-0.0474523	0.120793	0.0109754	0.242358	0.120479	0.127861	-0.00425451	0.324231		0.452296	0.444822	0.224966
	500.033	-0.569751		-0.0545904	0.120989	0.0313789	0.243736	0.0961097	0.127162	-0.271572	0.333098		0.414305	0.444534	0.212138
	500.038	-0.801055		-0.0614704	0.121144	0.0506747	0.245024	0.0663467	0.12679	-0.270432	0.36053		0.399685	0.444327	0.201332
	500.043	-0.355091		-0.0680423	0.121343	0.0681355	0.246369	0.0336926	0.126805	0.0275477	0.403709		0.40936	0.444203	0.214417
	500.048	0.691723		-0.074258	0.121505	0.0830917	0.247654	0.000474883	0.127186	0.322742	0.457077		0.420492	0.444164	0.223421
	500.053	-0.118983		-0.0800718	0.121705	0.0949554	0.248959	-0.0313131	0.128007	0.288811	0.515837		0.434808	0.444213	0.242306
	500.058	-0.505811		-0.0854403	0.121873	0.103242	0.25024	-0.0600935	0.129236	-0.0698773	0.575463		0.443997	0.444352	0.27007
	500.063	0.592504		-0.0903234	0.122072	0.107586	0.251495	-0.0847113	0.130946	-0.394659	0.631437		0.42786	0.444583	0.260435
	500.068	-1.38339		-0.094684	0.122247	0.107761	0.252764	-0.104382	0.133104	-0.335726	0.681188		0.403511	0.444907	0.244968
	500.073	-0.683606		-0.0984883	0.122445	0.103681	0.253963	-0.118602	0.135766	0.0703071	0.722544		0.392154	0.445325	0.24678
	500.078	0.317924		-0.101706	0.122625	0.0954139	0.255206	-0.127042	0.138908	0.42144	0.752964		0.39226	0.44584	0.217567
	500.083	0.736332		-0.104312	0.122821	0.0831749	0.256341	-0.12945	0.142559	0.362624	0.771489		0.386046	0.446451	0.208965
	500.088	-0.713949		-0.106284	0.123008	0.0673262	0.257542	-0.125588	0.146709	-0.0486063	0.777101		0.379406	0.447159	0.229484
	500.093	-2.76578		-0.107604	0.123202	0.0483656	0.258609	-0.115214	0.151352	-0.412185	0.768354		0.37539	0.447965	0.228286
	500.098	0.256789		-0.108259	0.123396	0.0269123	0.25975	-0.0981301	0.156497	-0.400167	0.745521		0.407312	0.448868	0.229088
	500.103	0.675735		-0.108239	0.12359	0.00368831	0.260745	-0.0742862	0.162105	-0.062298	0.708792		0.43533	0.449869	0.232305
	500.108	0.204825		-0.107542	0.123791	-0.0205046	0.261807	-0.0439398	0.168198	0.274648	0.658164		0.46702	0.450967	0.215717
	500.113	0.613293		-0.106167	0.123985	-0.0448103	0.262729	-0.00784253	0.174712	0.350677	0.595302		0.506886	0.452162	0.222642
	500.118	-0.61956		-0.104118	0.124194	-0.0683474	0.263699	0.032581	0.181675	0.175801	0.521447		0.535991	0.453451	0.239543
	500.123	-0.300322		-0.101407	0.124389	-0.0902393	0.264548	0.0751063	0.189016	-0.0652007	0.438033		0.537151	0.454835	0.220483
	500.128	-0.145678		-0.0980456	0.124609	-0.109645	0.265413	0.11668	0.196754	-0.221923	0.348842		0.522394	0.456311	0.232362
	500.133	-1.87672		-0.0940541	0.124807	-0.125791	0.266191	0.153532	0.204829	-0.259608	0.25912		0.525125	0.457877	0.215479
	500.138	0.0916214		-0.089455	0.125037	-0.138	0.266948	0.181446	0.213245	-0.192985	0.182439		0.56137	0.459532	0.204504
	500.143	-1.09221		-0.0842754	0.12524	-0.145718	0.267657	0.196191	0.221966	-0.0287029	0.154846		0.565959	0.461274	0.200252
	500.148	0.494354		-0.0785466	0.125482	-0.148539	0.268305	0.194078	0.230975	0.194531	0.201501		0.53345	0.463099	0.194344
	500.153	0.802385		-0.0723036	0.125693	-0.146224	0.268947	0.172571	0.240264	0.351959	0.288661		0.48417	0.465004	0.206669
	500.158	0.845865		-0.0655852	0.125947	-0.138715	0.269493	0.130874	0.2498	0.289045	0.387086		0.459524	0.466988	0.193836
	500.163	-1.29009		-0.0584335	0.126168	-0.126144	0.27007	0.0703682	0.259601	-0.024067	0.486001		0.44955	0.469046	0.194566
	500.168	0.773126		-0.0508937	0.126436	-0.108833	0.270523	-0.00516781	0.269622	-0.397152	0.581021		0.437175	0.471174	0.203415
	500.173	-0.408868		-0.0430141	0.126668	-0.087289	0.271036	-0.089661	0.279896	-0.523814	0.668393		0.430159	0.47337	0.213483
	500.178	-0.650568		-0.0348451	0.126951	-0.0621906	0.271409	-0.175179	0.290375	-0.242005	0.746339		0.441063	0.475629	0.207862
	500.183	0.672921		-0.0264396	0.127197	-0.0343685	0.271855	-0.252689	0.301088	0.274849	0.81367		0.444786	0.477946	0.191974
	500.188	0.170315		-0.0178524	0.127495	-0.00477861	0.272161	-0.313063	0.311995	0.61066	0.868552		0.450437	0.480319	0.177945
	500.193	1.0058		-0.00913971	0.127757	0.0255303	0.272539	-0.348205	0.323108	0.454762	0.910644		0.463484	0.482741	0.176222
	500.198	0.0461835		-0.000358865	0.12807	0.0554538	0.272789	-0.352149	0.334397	-0.0941031	0.939553		0.468212	0.485208	0.197238
	500.203	-3.31271		0.00843192	0.12835	0.0838724	0.273095	-0.321964	0.345844	-0.577233	0.954351		0.464386	0.487715	0.214141
	500.208	-0.841448		0.017174	0.128679	0.109694	0.273297	-0.258327	0.357434	-0.574106	0.955722		0.519577	0.490258	0.193269
	500.213	-0.544916		0.0258089	0.128978	0.131898	0.273525	-0.165664	0.369117	-0.0918397	0.944199		0.62405	0.49283	0.166244
	500.218	0.247236		0.0342782	0.129322	0.149575	0.273683	-0.051816	0.380888	0.432527	0.920031		0.692229	0.495427	0.172929
	500.223	0.597822		0.0425244	0.12964	0.161966	0.273827	0.0727259	0.392676	0.534165	0.884947		0.67533	0.498044	0.146416
	500.228	2.09128		0.050491	0.13	0.168496	0.273938	0.195935	0.404475	0.149765	0.840116		0.623692	0.500673	0.152601
	500.233	1.23405		0.0581232	0.130338	0.168801	0.273992	0.305565	0.416211	-0.335092	0.786445		0.568202	0.503311	0.178683
	500.238	0.74887		0.0653677	0.130712	0.162745	0.274049	0.390494	0.42787	-0.462796	0.726247		0.558107	0.505951	0.189143
	500.243	1.04134		0.0721739	0.131071	0.150433	0.274008	0.441935	0.439388	-0.13899	0.661251		0.587063	0.508588	0.174806
	500.248	1.59179		0.0784932	0.131459	0.132208	0.273999	0.45437	0.450741	0.292914	0.593126		0.604641	0.511215	0.175761
	500.253	-0.603367		0.0842802	0.131837	0.108644	0.273858	0.426091	0.461887	0.402745	0.524772		0.60965	0.513827	0.195233
	500.258	1.22216		0.0894928	0.132237	0.0805293	0.273769	0.359333	0.47279	0.0967281	0.458207		0.582558	0.516419	0.194979
	500.263	-0.728995		0.0940922	0.132634	0.0488325	0.273525	0.259972	0.483432	-0.30705	0.395208		0.53288	0.518983	0.211258
	500.268	-0.960957		0.0980434	0.133045	0.0146727	0.273339	0.136883	0.493772	-0.413061	0.338596		0.497067	0.521515	0.235787
	500.273	-0.516198		0.101316	0.133459	-0.0207249	0.272992	0.00100973	0.503811	-0.138158	0.290309		0.464192	0.524008	0.256545
	500.278	1.82684		0.103882	0.13388	-0.056076	0.272695	-0.135706	0.513505	0.236391	0.25152		0.434155	0.526458	0.237679
	500.283	0.843594		0.105721	0.134309	-0.0900861	0.272245	-0.261445	0.522865	0.371589	0.223167		0.440086	0.528857	0.19738
	500.288	-1.02954		0.106814	0.134737	-0.121501	0.271823	-0.365569	0.531851	0.190431	0.203772		0.466283	0.531202	0.190491
	500.293	-0.623969		0.10715	0.135179	-0.149155	0.271273	-0.439519	0.54047	-0.103141	0.189582		0.495401	0.533485	0.188383
	500.298	-0.773549		0.10672	0.135613	-0.172018	0.270719	-0.477494	0.54869	-0.26594	0.177156		0.512831	0.535702	0.191466
	500.303	-0.799275		0.105523	0.136066	-0.189232	0.27007	-0.476872	0.556501	-0.226803	0.16341		0.531315	0.537848	0.178238
	500.308	-0.76698		0.10356	0.136503	-0.200147	0.269382	-0.438335	0.563882	-0.0791382	0.145379		0.566239	0.539918	0.15739
	500.313	-0.903855		0.10084	0.136964	-0.204343	0.268639	-0.365722	0.570803	0.0619371	0.121982		0.598414	0.541906	0.146062
	500.318	-0.624578		0.0973759	0.137403	-0.201648	0.267818	-0.265625	0.577248	0.147877	0.093518		0.617717	0.543808	0.175655
	500.323	1.82413		0.0931857	0.137868	-0.192138	0.266985	-0.146765	0.58317	0.17023	0.0621725		0.610362	0.54562	0.213406
	500.328	-0.0336204		0.0882929	0.138306	-0.17614	0.266039	-0.0192222	0.588558	0.113382	0.0434932		0.607826	0.547336	0.237379
	500.333	-0.251701		0.082726	0.138773	-0.154211	0.265118	0.106431	0.593357	-0.02562	0.0672566		0.607473	0.548953	0.237462
	500.338	0.232194		0.0765183	0.139208	-0.127121	0.26406	0.220005	0.597554	-0.182895	0.115109		0.602453	0.550468	0.215913
	500.343	1.04966		0.0697078	0.139674	-0.0958192	0.263053	0.312516	0.601099	-0.237822	0.17029		0.584149	0.551875	0.20582
	500.348	-0.301643		0.0623372	0.140104	-0.0613984	0.261895	0.37688	0.603978	-0.116481	0.228287		0.552529	0.553173	0.213597
	500.353	0.825805		0.0544533	0.140565	-0.0250544	0.260803	0.408441	0.606155	0.107506	0.287288		0.492516	0.554357	0.208538
	500.358	0.999854		0.0461071	0.140989	0.011958	0.259562	0.405283	0.607616	0.244269	0.344786		0.42819	0.555425	0.195953
	500.363	1.91339		0.0373532	0.141443	0.048371	0.258384	0.36833	0.608347	0.15944	0.398954		0.397647	0.556375	0.188464
	500.368	1.70174		0.0282498	0.141858	0.0829477	0.257071	0.301221	0.608333	-0.0745346	0.448532		0.409193	0.557203	0.188234
	500.373	-0.759974		0.0188579	0.142302	0.114525	0.255806	0.20999	0.607582	-0.227426	0.491242		0.429734	0.557908	0.191734
	500.378	1.21418		0.00924127	0.142706	0.142054	0.254432	0.102577	0.606087	-0.142682	0.525798		0.432462	0.558489	0.210455
	500.383	-0.474731		-0.000534118	0.143138	0.164632	0.253077	-0.0117888	0.603869	0.0867474	0.551505		0.43435	0.558943	0.209089
	500.388	1.04993		-0.0104005	0.143531	0.181532	0.251648	-0.123294	0.600928	0.206891	0.566728		0.456573	0.559271	0.219178
	500.393	0.306512		-0.020289	0.143948	0.192225	0.2502	-0.222301	0.597294	0.0780755	0.570938		0.462255	0.55947	0.225902
	500.398	0.65378		-0.0301295	0.144328	0.196392	0.248716	-0.300104	0.592973	-0.165497	0.563922		0.458296	0.559542	0.213536
	500.403	-1.06025		-0.039852	0.144729	0.193938	0.247172	-0.349659	0.587992	-0.258194	0.544707		0.442257	0.559485	0.199413
	500.408	2.4337		-0.0493865	0.145095	0.184983	0.24563	-0.36622	0.582365	-0.0927522	0.513813		0.436897	0.5593	0.206738
	500.413	0.896144		-0.0586636	0.145478	0.169863	0.243988	-0.347845	0.57611	0.166504	0.472008		0.469789	0.558987	0.204938
	500.418	0.517046		-0.0676153	0.145829	0.149112	0.242379	-0.295709	0.569243	0.267554	0.41966		0.518935	0.558548	0.230702
	500.423	0.224376		-0.0761753	0.146193	0.123441	0.240639	-0.214163	0.561774	0.135558	0.358971		0.549677	0.557984	0.244525
	500.428	-1.1005		-0.0842796	0.14653	0.0937196	0.238952	-0.110518	0.55372	-0.0756263	0.292582		0.532913	0.557297	0.205468
	500.433	-0.451085		-0.091867	0.146875	0.0609389	0.237113	0.00548084	0.545083	-0.179396	0.22514		0.522263	0.556488	0.19597
	500.438	-1.58783		-0.0988794	0.147197	0.0261831	0.235336	0.122481	0.53588	-0.151267	0.169698		0.556575	0.555559	0.189547
	500.443	-0.112406		-0.105263	0.147521	-0.00940772	0.233401	0.22858	0.526116	-0.0997987	0.152175		0.59315	0.554514	0.210523
	500.448	1.17999		-0.110967	0.147828	-0.0446743	0.231523	0.312531	0.515809	-0.0811981	0.1903		0.586481	0.553356	0.201917
	500.453	1.8033		-0.115947	0.148133	-0.0784755	0.229496	0.364981	0.504973	-0.0186267	0.262592		0.556894	0.552087	0.190804
	500.458	1.00253		-0.120162	0.148426	-0.109725	0.227507	0.379567	0.493631	0.158306	0.347137		0.522552	0.550711	0.194445
	500.463	0.296589		-0.123578	0.148711	-0.137427	0.225393	0.353753	0.481811	0.34223	0.435029		0.511719	0.549232	0.175414
	500.468	1.75811		-0.126165	0.14899	-0.160705	0.223288	0.289272	0.469549	0.303472	0.520886		0.484163	0.547655	0.155573
	500.473	2.61168		-0.1279	0.149257	-0.178836	0.221093	0.192082	0.456889	-0.0438179	0.601637		0.447958	0.545983	0.172243
	500.478	-6.26916		-0.128766	0.149523	-0.191266	0.218873	0.0718318	0.44388	-0.470515	0.675446		0.426956	0.544222	0.191966
	500.483	-0.0829258		-0.128753	0.149773	-0.197634	0.216604	-0.0591256	0.430582	-0.594654	0.739739		0.427267	0.542376	0.197071
	500.488	1.2915		-0.127856	0.150027	-0.197782	0.214273	-0.18708	0.417059	-0.24731	0.793287		0.447851	0.540452	0.21848
	500.493	-1.85713		-0.12608	0.150261	-0.191757	0.211936	-0.298497	0.40338	0.330957	0.835324		0.453314	0.538453	0.230802
	500.498	0.822521		-0.123432	0.150504	-0.179812	0.209506	-0.381565	0.389621	0.676265	0.864381		0.440879	0.536387	0.212662
	500.503	0.562213		-0.119929	0.150724	-0.162397	0.207108	-0.427557	0.375857	0.50174	0.880363		0.444377	0.534259	0.190555
	500.508	0.384797		-0.115594	0.150957	-0.140142	0.204591	-0.431832	0.362165	-0.0561567	0.883148		0.457814	0.532075	0.184874
	500.513	-3.11053		-0.110455	0.151165	-0.113833	0.202138	-0.394365	0.348621	-0.55633	0.872105		0.474173	0.529841	0.171106
	500.518	-1.23985		-0.104549	0.15139	-0.0843889	0.199553	-0.319703	0.335301	-0.619461	0.848143		0.519368	0.527565	0.163583
	500.523	-0.380984		-0.0979155	0.151587	-0.0528259	0.19705	-0.216391	0.322275	-0.227419	0.811959		0.602008	0.525252	0.165212
	500.528	-0.914909		-0.0906022	0.151805	-0.0202225	0.194414	-0.0959069	0.309609	0.283944	0.764094		0.661742	0.522909	0.181709
	500.533	0.594437		-0.0826614	0.151994	0.0123184	0.191866	0.0287363	0.297372	0.517184	0.706546		0.675788	0.520545	0.182174
	500.538	2.31334		-0.0741503	0.152207	0.0437086	0.189198	0.144546	0.285619	0.335738	0.640661		0.642945	0.518164	0.183393
	500.543	1.60909		-0.0651305	0.152389	0.0729121	0.186607	0.240063	0.274414	-0.0558833	0.567884		0.61087	0.515775	0.20102
	500.548	-0.000190523		-0.0556679	0.152597	0.0989821	0.183922	0.30663	0.263808	-0.325657	0.491087		0.593851	0.513385	0.198093
	500.553	1.33176		-0.0458318	0.152776	0.121093	0.181294	0.339271	0.253861	-0.306128	0.412583		0.56607	0.511001	0.201308
	500.558	1.11003		-0.0356943	0.15298	0.138567	0.178605	0.337062	0.244622	-0.0940642	0.336015		0.535318	0.50863	0.209818
	500.563	1.40244		-0.0253302	0.153156	0.1509	0.175942	0.302985	0.236144	0.100567	0.267659		0.523148	0.506279	0.231779
	500.568	-0.0906647		-0.014816	0.153358	0.157772	0.173259	0.24329	0.228477	0.162463	0.215864		0.527226	0.503955	0.22239
	500.573	0.493856		-0.00422915	0.153533	0.159061	0.170566	0.166495	0.221656	0.12257	0.193258		0.535838	0.501667	0.199565
	500.578	0.516501		0.00635195	0.153734	0.154837	0.167894	0.082169	0.215721	0.0520593	0.205159		0.544531	0.49942	0.194004
	500.583	0.337378		0.0168492	0.15391	0.145365	0.165177	-0.000316798	0.21068	-0.0291248	0.240711		0.535217	0.497222	0.192695
	500.588	0.849706		0.027185	0.154109	0.131082	0.162519	-0.0728908	0.20654	-0.121158	0.286268		0.522408	0.495081	0.197464
	500.593	-0.894589		0.0372833	0.154287	0.112586	0.159785	-0.129606	0.20327	-0.172755	0.331899		0.515392	0.493001	0.189462
	500.598	0.846097		0.0470696	0.154486	0.0906051	0.157141	-0.167094	0.200828	-0.106266	0.373027		0.540993	0.490992	0.196666
	500.603	0.839139		0.0564723	0.154667	0.0659727	0.154401	-0.184621	0.199137	0.0700148	0.407464		0.547711	0.489058	0.214103
	500.608	0.949989		0.0654226	0.154865	0.0395924	0.15177	-0.183782	0.198101	0.216368	0.433279		0.502554	0.487207	0.18693
	500.613	0.961514		0.0738553	0.155049	0.0124048	0.149036	-0.16793	0.19761	0.178461	0.450403		0.434481	0.485444	0.153934
	500.618	1.44957		0.0817096	0.155247	-0.0146465	0.14642	-0.141438	0.197526	-0.0390777	0.458767		0.376437	0.483776	0.170266
	500.623	0.539559		0.0889291	0.155434	-0.0406491	0.143706	-0.108943	0.197725	-0.243888	0.458006		0.360022	0.482208	0.161496
	500.628	0.264853		0.0954625	0.155632	-0.0647534	0.141108	-0.0746824	0.198055	-0.232843	0.44925		0.378711	0.480747	0.171955
	500.633	0.79406		0.101264	0.155822	-0.0862003	0.138433	-0.0420133	0.198398	-0.00439791	0.433297		0.418294	0.479396	0.200601
	500.638	1.10559		0.106293	0.156018	-0.104346	0.135861	-0.0131627	0.198617	0.223609	0.410875		0.43244	0.478162	0.203356
	500.643	0.624191		0.110517	0.156212	-0.11868	0.133243	0.0107857	0.198609	0.226343	0.38401		0.437632	0.477049	0.198346
	500.648	0.974454		0.113907	0.156406	-0.128841	0.130711	0.0297048	0.198271	0.00213631	0.354053		0.435248	0.476061	0.202787
	500.653	0.107806		0.116442	0.156601	-0.134622	0.128174	0.0441047	0.19752	-0.222353	0.322254		0.410232	0.475203	0.199476
	500.658	-0.203134		0.118109	0.156793	-0.135973	0.125699	0.0547612	0.196297	-0.223259	0.291032		0.400284	0.474479	0.210618
	500.663	1.07661		0.118899	0.156988	-0.132998	0.123267	0.0623743	0.194537	-0.00765183	0.262216		0.440371	0.473891	0.207014
[truncated: 706 more rows]

## Sheet: ACL-Ti-2pi-MTM (depth)
Frequency	Power	Harmonic_CL	AR1_CL	AR1_fit	AR1_90_power	AR1_95_power	AR1_99_power
[truncated: 1,511 more rows]

## Sheet: ACL-Ti-2pi-MTM (time)
Frequency	Power	Harmonic_CL	AR1_CL	AR1_fit	AR1_90_power	AR1_95_power	AR1_99_power
[truncated: 1,503 more rows]

[truncated: 4 more sheets: Ratio of frequencies, Aeolian dust ratios, Astronomical target calculation, Filters (depth) 1mm resampled]
