# Supplementary material for: Astronomical calibration of the middle Cambrian in Baltica: Global carbon cycle synchronization and climate dynamics
Source: Research Square preprint supplement (doi:10.21203/rs.3.rs-7509865/v1), 2025-09-11
Supplement: Supplementary file 3 [file bb6bd96ea563b31cf74e3683.xlsx]

## Sheet: Z score dataset (this study)
DepthOrig	DepthCorr	DepthAdj	Al	Si	Ca	Ti	K	Zr
200	200.18	62.111	1.78007	1.72555	-0.0212794	1.57549				This dataset is the one used for the spetral analysis. It has to be saved as a .csv file. It correspond to the "Z score.csv" file used in the protocol (Supplementary Materials 3)
	200.18	62.112	1.83228	1.61873	-0.121846	1.10323
200.001	200.181	62.113	1.8845	1.51192	-0.222413	0.630971
200.002	200.182	62.114	0.65451	1.37908	0.161024	0.81778
200.003	200.183	62.115	1.51831	1.30151	1.6272	0.677237
200.005	200.185	62.116	1.85144	1.40306	1.2902	0.339409
200.006	200.186	62.117	1.97959	1.33796	1.83829	0.864046
	200.186	62.118	1.28667	0.972713	1.60226	0.371271
200.007	200.187	62.119	0.593747	0.60747	1.36624	-0.121504
200.008	200.188	62.12	-0.175642	0.349248	0.1973	-0.419177
200.009	200.189	62.121	1.51066	1.54079	-0.293272	0.959197
200.011	200.191	62.122	1.01587	0.750081	0.245531	0.659778
	200.191	62.123	0.720733	0.696974	0.72407	0.384365
200.012	200.192	62.124	0.425595	0.643867	1.20261	0.108952
200.013	200.193	62.125	0.644264	0.601442	1.63094	0.0338792
200.014	200.194	62.126	0.726281	0.638598	0.981465	-0.145074
200.016	200.196	62.127	0.146343	0.720644	-0.176235	0.0871286
200.017	200.197	62.128	1.7342	1.29043	1.25613	0.726994
	200.198	62.129	1.06126	0.964594	0.5832	0.620059
200.02	200.2	62.13	0.388323	0.638756	-0.0897265	0.513124
200.019	200.199	62.131	1.23937	1.21289	0.0290554	1.05784
200.02	200.2	62.132	0.020341	1.40078	-0.666293	1.11371
200.022	200.202	62.133	0.859397	1.17706	0.111407	0.730486
	200.202	62.134	0.426356	1.18425	0.0925768	0.731796
200.023	200.203	62.135	-0.00668495	1.19144	0.0737461	0.733105
200.024	200.204	62.136	-0.277749	-0.323714	-0.0455489	-0.242843
200.025	200.205	62.137	0.151354	-0.155716	-0.498459	-0.193958
200.027	200.207	62.138	-0.0438232	-0.433454	0.00837759	-0.248954
200.028	200.208	62.139	-0.652175	-0.0789121	-0.361565	-0.406956
	200.208	62.14	0.200417	0.0661496	-0.208816	-0.152057
200.029	200.209	62.141	1.05301	0.211211	-0.0560674	0.102842
200.03	200.21	62.142	-0.0470448	0.505699	-0.332524	0.142124
200.031	200.211	62.143	1.1331	1.09931	-0.612521	0.775879
200.033	200.213	62.144	0.575849	0.271475	-0.625553	0.344646
	200.214	62.145	0.724737	0.133982	-0.101913	0.0971674
200.034	200.214	62.146	0.873626	-0.00351097	0.421728	-0.150311
200.035	200.215	62.147	-0.334665	-0.439679	-1.00186	-0.593765
200.036	200.216	62.148	-0.58716	-0.298025	-0.428422	-0.448857
200.038	200.218	62.149	-0.850976	-0.695385	-1.00776	-1.11578
200.039	200.219	62.15	-0.315827	-0.72321	-0.71278	-0.71074
	200.22	62.151	-0.706428	-0.722581	-0.822275	-0.940323
200.04	200.22	62.152	-1.09703	-0.721952	-0.931769	-1.16991
200.041	200.221	62.153	-0.110493	-0.466272	-0.596102	-0.305695
200.042	200.222	62.154	-0.52058	-0.449037	-1.05271	-0.788431
200.044	200.224	62.155	-0.746139	-0.617048	-1.40664	-1.38029
	200.225	62.156	-0.686069	-0.539858	-1.07105	-1.1734
200.045	200.225	62.157	-0.625999	-0.462668	-0.735459	-0.966511
200.046	200.226	62.158	-1.80467	-0.511869	-1.00843	-1.07388
200.047	200.227	62.159	-1.40384	-1.11486	-0.693179	-2.03325
200.049	200.229	62.16	-1.35726	-0.967317	-1.37965	-1.74517
200.05	200.23	62.161	-2.25856	-0.690287	-1.34815	-1.75216
	200.231	62.162	-1.20305	-0.569092	-1.36359	-1.5444
200.051	200.231	62.163	-0.147542	-0.447897	-1.37904	-1.33664
200.052	200.232	62.164	-1.57983	-0.978444	-1.50131	-1.57844
200.053	200.233	62.165	-0.423126	0.0601207	-1.94349	-1.06341
200.055	200.235	62.166	-1.55826	-0.256832	-2.11379	-1.55225
	200.236	62.167	-0.652667	0.0552516	-1.749	-1.03635
200.056	200.236	62.168	0.252925	0.367335	-1.38422	-0.520438
200.057	200.237	62.169	-0.531184	-0.241183	-1.26051	-1.03897
200.058	200.238	62.17	0.636657	0.202273	-1.42142	-0.875725
200.06	200.24	62.171	-2.49727	-1.21452	-1.42619	-2.10395
200.061	200.241	62.172	0.055063	-0.595147	-1.62635	-1.33577
	200.242	62.173	-0.272425	-0.812262	-1.47611	-1.60289
200.062	200.242	62.174	-0.599913	-1.02938	-1.32588	-1.87001
200.063	200.243	62.175	-1.62497	-1.20532	-0.61796	-1.8508
200.065	200.245	62.176	-1.27417	-1.11459	-1.11253	-1.68407
200.066	200.246	62.177	-0.498834	-0.667849	-0.708265	-1.63344
	200.246	62.178	-1.04284	-0.806265	-1.08172	-1.70807
200.067	200.247	62.179	-1.58685	-0.944682	-1.45518	-1.78271
200.068	200.248	62.18	-0.445722	-1.26199	-1.43589	-2.33965
200.069	200.249	62.181	-2.26755	-1.45718	-0.773684	-2.34314
200.071	200.251	62.182	1.66328	1.98687	-0.0987057	2.05561
	200.251	62.183	1.6827	1.71624	0.367802	1.90285
200.072	200.252	62.184	1.70212	1.44561	0.834309	1.75008
200.073	200.253	62.185	1.44555	1.2319	0.79044	1.21148
200.074	200.254	62.186	0.220977	1.6466	-0.158943	0.884124
200.076	200.256	62.187	0.628961	1.78893	-0.124617	1.55891
200.077	200.257	62.188	0.81322	1.30132	0.00422151	0.764531
	200.257	62.189	0.303017	1.27894	-0.209201	0.761039
200.078	200.258	62.19	-0.207187	1.25655	-0.422624	0.757547
200.079	200.259	62.191	0.481303	0.938971	0.357129	0.634463
200.08	200.26	62.192	1.11247	1.11494	0.37519	0.140378
200.082	200.262	62.193	0.880919	1.31937	0.132496	0.760166
	200.262	62.194	0.910406	1.35654	0.10425	0.657159
200.083	200.263	62.195	0.939893	1.39371	0.0760037	0.554152
200.084	200.264	62.196	0.561575	0.824827	0.105404	0.231164
200.085	200.265	62.197	1.24778	0.777356	0.742465	0.38742
200.087	200.267	62.198	-0.243117	0.297163	0.539073	0.238147
200.088	200.268	62.199	1.32018	1.46017	-0.709547	0.552406
	200.268	62.2	1.73429	1.53829	-0.450023	0.792465
200.089	200.269	62.201	2.14841	1.6164	-0.190499	1.03252
200.09	200.27	62.202	1.26295	2.12355	-0.722529	1.32234
200.091	200.271	62.203	0.87282	1.61644	-0.268695	-0.159914
200.093	200.273	62.204	0.767759	2.23534	-0.441095	0.545423
	200.274	62.205	1.01021	2.10667	-0.411387	0.658905
200.094	200.274	62.206	1.25266	1.97801	-0.381678	0.772387
200.095	200.275	62.207	1.90741	2.3182	-0.831459	1.32059
200.096	200.276	62.208	0.834922	1.62115	-1.02864	0.784609
200.098	200.278	62.209	1.48157	2.10186	-0.587584	1.18703
200.099	200.279	62.21	0.8334	2.06603	-0.825764	0.886743
	200.28	62.211	-0.728778	0.0613723	-0.9751	-0.438382
200.1	200.28	62.212	-2.29096	-1.94329	-1.12444	-1.76351
200.101	200.281	62.213	-0.470287	-1.30702	-0.790668	-0.556229
200.102	200.282	62.214	-0.736206	-1.22994	-0.641819	-0.961274
200.103	200.283	62.215	-1.44188	-1.20389	-0.585121	-0.999683
200.104	200.284	62.216	-0.916885	-0.974394	-0.479731	-0.50298
200.105	200.285	62.217	-1.31221	-0.876175	-0.534222	-0.777956
200.107	200.287	62.218	-0.707166	-0.780616	-0.628632	-0.231495
200.108	200.288	62.219	-0.820102	-0.358118	-0.864759	0.331552
200.109	200.289	62.22	-0.231975	-0.0282428	0.0793389	0.404879
	200.29	62.221	-0.157453	-0.100164	-0.0699723	0.394404
200.11	200.29	62.222	-0.0829302	-0.172086	-0.219283	0.383929
200.111	200.291	62.223	0.515577	-0.270462	0.248712	0.518362
200.112	200.292	62.224	0.753396	0.463326	-0.107018	1.24465
200.113	200.293	62.225	-0.0150522	0.0401334	-0.423137	0.869284
200.114	200.294	62.226	0.479289	0.48777	-0.0665345	1.30488
200.115	200.295	62.227	-1.02011	-0.465197	-0.678915	0.234656
200.116	200.296	62.228	-0.644434	-0.770249	-0.905961	0.14998
200.118	200.298	62.229	-1.10012	-0.750498	-0.770093	0.151726
200.119	200.299	62.23	0.435976	-0.622566	-0.412721	0.388293
200.12	200.3	62.231	-0.0370667	-0.637258	-0.209842	0.102842
200.121	200.301	62.232	-0.102126	-0.221261	-0.0753085	0.1945
	200.302	62.233	-0.019124	-0.400216	-0.32942	0.108079
200.122	200.302	62.234	0.0638777	-0.579171	-0.583531	0.021658
200.123	200.303	62.235	-0.409881	-0.639853	-0.371314	0.146489
200.124	200.304	62.236	-0.741172	-0.59689	-0.0829023	0.00856391
200.125	200.305	62.237	0.166433	-0.146948	-0.547203	0.525345
200.126	200.306	62.238	-0.22334	0.210058	-0.628273	0.576849
200.127	200.307	62.239	-0.0483872	0.607274	-0.485888	1.00983
200.128	200.308	62.24	0.246034	0.106557	-0.453204	0.596053
200.13	200.31	62.241	0.74919	0.132088	0.195966	0.76715
200.131	200.311	62.242	0.741897	-0.1859	0.110227	0.302745
200.132	200.312	62.243	-1.25207	-0.271327	-0.423906	-0.221893
200.133	200.313	62.244	-0.647655	-0.538554	-0.656955	-0.268158
	200.314	62.245	-0.51304	-0.469752	-0.61052	0.0722886
200.134	200.314	62.246	-0.378425	-0.40095	-0.564084	0.412736
200.135	200.315	62.247	-0.484023	-0.131325	-0.26382	0.13514
200.136	200.316	62.248	0.549181	0.574691	0.0603543	0.797703
200.137	200.317	62.249	1.3558	1.68058	-0.0471908	1.27171
200.138	200.318	62.25	1.29772	1.88029	0.26626	1.44717
200.139	200.319	62.251	1.51782	1.49008	0.366519	1.58684
200.14	200.32	62.252	0.548465	0.566198	0.0734383	0.87714
200.142	200.322	62.253	0.918192	0.229128	0.277086	0.829129
200.143	200.323	62.254	0.671961	0.0352578	0.532968	0.531456
200.144	200.324	62.255	-1.42895	-0.853829	0.701366	-0.439255
	200.325	62.256	-1.71542	-1.08849	0.976771	-0.601622
200.145	200.325	62.257	-2.0019	-1.32316	1.25218	-0.763989
200.146	200.326	62.258	0.190282	-0.829647	0.883669	-0.0254808
200.147	200.327	62.259	-1.79858	-1.14994	0.871663	-0.619081
200.148	200.328	62.26	-1.06164	-1.2766	0.484275	-0.771845
200.149	200.329	62.261	-0.96597	-1.10268	0.536508	-0.925483
200.15	200.33	62.262	-1.6158	-1.70479	-0.0534506	-1.55749
200.151	200.331	62.263	-2.48703	-2.62667	-0.86676	-2.91666
200.153	200.333	62.264	-1.04852	-2.20754	-0.393839	-2.08737
200.154	200.334	62.265	-1.9283	-1.36645	-0.626887	-1.28164
200.155	200.335	62.266	-0.488945	-1.10107	-0.515905	-1.01365
200.156	200.336	62.267	-1.10974	-1.33756	-0.660033	-1.64391
	200.337	62.268	-1.23665	-1.11364	-0.624219	-1.59372
200.157	200.337	62.269	-1.36357	-0.889727	-0.588405	-1.54353
200.158	200.338	62.27	-0.663674	-1.16733	-1.2267	-1.31307
200.159	200.339	62.271	-0.215286	0.0364898	-1.07385	-0.281253
200.16	200.34	62.272	-0.210543	-0.305561	-0.900932	-0.667965
200.161	200.341	62.273	-1.59504	-1.4857	-0.937413	-1.4702
200.162	200.342	62.274	-0.416996	-1.00506	-1.176	-1.05642
200.163	200.343	62.275	-0.0473133	-0.748584	-1.17898	-0.741293
200.165	200.345	62.276	-0.55566	-0.667351	-0.690511	-0.52393
200.166	200.346	62.277	1.13458	-0.55959	-0.358487	-0.399973
200.167	200.347	62.278	-0.266742	-0.489995	-0.481271	-0.442747
200.168	200.348	62.279	-0.708061	-0.728754	-0.61406	-0.786685
	200.349	62.28	-1.38604	-1.44507	-0.525884	-1.36414
200.169	200.349	62.281	-2.06401	-2.16138	-0.437709	-1.94159
200.17	200.35	62.282	-1.90736	-2.63011	-0.285268	-2.76041
200.171	200.351	62.283	-1.57817	-1.52059	-0.305535	-1.24236
200.172	200.352	62.284	-1.51691	-1.91369	-0.814578	-1.75041
200.173	200.353	62.285	0.773576	-0.0365129	0.494998	0.534947
200.174	200.354	62.286	0.89215	0.259902	0.105507	0.840477
200.175	200.355	62.287	0.780512	0.953388	0.360054	0.967053
200.177	200.357	62.288	0.924143	0.838301	0.893675	1.15561
200.178	200.358	62.289	1.24299	0.817815	-0.0214333	0.821272
200.179	200.359	62.29	2.00903	1.54403	-0.0879307	1.56676
	200.359	62.291	1.6423	1.62448	0.486558	1.54014
200.18	200.36	62.292	1.27557	1.70494	1.06105	1.51351
200.181	200.361	62.293	0.19158	0.458778	0.547026	0.29227
200.182	200.362	62.294	1.09086	0.512266	0.778638	0.0434816
200.183	200.363	62.295	0.883828	0.513065	1.77261	0.345519
200.184	200.364	62.296	2.04509	0.925104	2.12316	1.00459
200.185	200.365	62.297	0.577236	0.564953	2.81414	0.358613
200.186	200.366	62.298	-0.417532	0.185103	3.4747	-0.0246079
200.188	200.368	62.299	1.07243	0.63924	2.02336	0.830874
200.189	200.369	62.3	-0.334531	0.155928	2.05004	0.0705427
200.19	200.37	62.301	0.432262	0.370638	0.949807	0.2687
200.191	200.371	62.302	0.435126	0.694916	0.480888	1.03776
	200.371	62.303	0.639856	0.965321	0.419342	1.23548
200.192	200.372	62.304	0.844586	1.23573	0.357796	1.4332
200.193	200.373	62.305	0.916805	1.00315	0.840518	1.05086
200.194	200.374	62.306	2.21445	0.918721	3.1514	0.757547
200.195	200.375	62.307	1.08769	0.970125	1.93239	1.22806
200.196	200.376	62.308	0.104819	0.649345	0.238194	0.977529
200.197	200.377	62.309	0.595894	0.00820616	-0.323545	0.266082
200.198	200.378	62.31	-0.698038	-0.136213	-0.772966	0.297507
200.2	200.38	62.311	0.0504543	-0.145519	-0.943725	-0.0595255
200.201	200.381	62.312	0.098734	0.121813	-0.513031	0.25386
200.202	200.382	62.313	0.533654	-0.0572341	-0.297839	0.546296
200.203	200.383	62.314	0.925082	0.981265	-0.128671	1.24203
	200.383	62.315	0.793421	1.16683	-0.0703571	1.77147
200.204	200.384	62.316	0.661759	1.3524	-0.0120437	2.30091
200.205	200.385	62.317	0.562962	0.395278	-0.0703314	1.71778
200.206	200.386	62.318	1.26161	0.973244	0.211307	1.97006
200.207	200.387	62.319	-0.58546	0.25652	0.118899	1.17569
200.208	200.388	62.32	0.32917	-0.0211784	0.7654	0.681602
200.209	200.389	62.321	0.415483	0.504218	0.201097	1.15735
200.21	200.39	62.322	-0.443395	-0.118834	0.204124	0.653667
200.212	200.392	62.323	1.24367	0.623198	0.417059	1.61914
200.213	200.393	62.324	-0.152688	0.138392	0.233114	0.762785
200.214	200.394	62.325	0.512848	0.101432	0.406746	1.26036
	200.394	62.326	0.151197	-0.0996137	0.212205	1.0155
200.215	200.395	62.327	-0.210453	-0.300659	0.0176646	0.770642
200.216	200.396	62.328	0.0124211	0.380769	0.303254	1.57026
200.217	200.397	62.329	1.14567	0.551362	0.147889	1.48645
200.218	200.398	62.33	-1.22164	-0.449391	0.32111	0.191009
200.219	200.399	62.331	-0.514047	-0.453035	0.232703	0.184025
200.22	200.4	62.332	-0.376188	-0.156568	1.46095	0.686839
200.221	200.401	62.333	-0.311129	0.302904	0.688949	1.35551
200.223	200.403	62.334	-0.193719	-0.173278	-0.332421	0.616131
200.224	200.404	62.335	0.317447	0.152364	-0.0628402	0.680729
200.225	200.405	62.336	-0.3514	-0.539629	-0.0169694	-0.133725
200.226	200.406	62.337	-1.88695	-2.01254	-1.02413	-1.51821
	200.406	62.338	-1.36279	-1.82229	-1.10222	-1.48722
200.227	200.407	62.339	-0.838627	-1.63205	-1.18031	-1.45623
200.228	200.408	62.34	-1.48416	-1.79214	-0.250839	-1.60376
200.229	200.409	62.341	0.144553	-0.287094	1.69939	0.566373
200.23	200.41	62.342	-0.563043	-0.791088	0.864992	-0.379895
200.231	200.411	62.343	-0.549485	-0.693078	-0.0894699	-0.291728
200.232	200.412	62.344	-0.600763	-0.702685	-0.306048	-0.496869
200.233	200.413	62.345	-0.449525	-1.08069	0.799675	-0.468062
200.235	200.415	62.346	-0.863907	-0.931038	0.9162	-0.483775
200.236	200.416	62.347	-0.341735	-0.683576	0.56011	-0.145074
200.237	200.417	62.348	0.0980181	-0.0518736	0.191912	0.0827639
200.238	200.418	62.349	-0.358022	0.233636	0.548617	0.41099
	200.418	62.35	-0.633292	-0.26923	0.127031	-0.210981
200.239	200.419	62.351	-0.908563	-0.772097	-0.294555	-0.832951
200.24	200.42	62.352	0.40103	-0.414266	0.561752	-0.323154
200.241	200.421	62.353	-1.02548	-0.963123	0.208742	-1.00667
200.242	200.422	62.354	-0.79849	-0.906818	-0.33042	-0.730817
200.243	200.423	62.355	-0.630026	-0.972075	0.107251	-0.756133
200.244	200.424	62.356	0.14594	-0.674598	1.00697	-0.335375
200.245	200.425	62.357	0.89036	-0.653445	1.26736	-0.116267
200.247	200.427	62.358	-0.515971	-0.754076	0.142245	-0.564085
200.248	200.428	62.359	-1.0747	-0.798297	0.469036	-0.270777
200.249	200.429	62.36	0.519739	-0.243568	1.23222	0.378691
	200.429	62.361	-0.0151194	-0.343773	1.01379	-0.0542879
200.25	200.43	62.362	-0.549977	-0.443978	0.795365	-0.487267
200.251	200.431	62.363	-0.0765765	-0.905206	0.791107	-0.278634
200.252	200.432	62.364	0.0419975	-0.636118	0.553645	-0.41394
200.253	200.433	62.365	-0.502861	-0.734482	-0.207687	-0.778829
200.254	200.434	62.366	-0.882521	-0.630273	-0.419391	-0.557975
200.255	200.435	62.367	-1.16866	-1.1739	-0.201582	-0.702883
200.256	200.436	62.368	0.0213701	-0.672619	-0.418108	-0.548373
200.258	200.438	62.369	-1.19345	-0.72954	-0.965069	-0.386878
200.259	200.439	62.37	0.219098	-0.153396	1.21631	-0.0132596
200.26	200.44	62.371	0.0145241	-0.291367	1.54546	0.0941121
200.261	200.441	62.372	0.703058	-0.459614	1.95753	0.390039
	200.441	62.373	0.120189	-0.670883	1.53643	0.0591945
200.262	200.442	62.374	-0.46268	-0.882151	1.11533	-0.27165
200.263	200.443	62.375	0.511371	-0.420963	1.62022	0.081018
200.264	200.444	62.376	0.559875	0.223361	1.52273	0.706917
200.265	200.445	62.377	0.483361	0.435777	1.24335	0.4913
200.266	200.446	62.378	0.868659	-0.136895	1.99719	-0.184356
200.267	200.447	62.379	-0.0161709	-0.534714	7.34176	-0.612097
200.268	200.448	62.38
200.272	200.452	62.381	-0.166785	0.785579	-1.22298	0.702595
200.275	200.455	62.382	0.628592	0.810302	0.615946	0.694614
200.276	200.456	62.383	0.417355	1.09903	-1.92321	1.09368
200.277	200.457	62.384	0.52546	0.950282	-1.2698	0.329466
200.278	200.458	62.385	0.396851	1.01504	-0.0415055	0.598837
200.279	200.459	62.386	0.268243	1.07981	1.18679	0.868209
200.282	200.462	62.387	-0.519959	0.373426	-1.20767	0.832292
200.283	200.463	62.388	0.767921	0.444766	0.787394	0.650716
200.285	200.465	62.389	2.31954	0.442192	0.912019	0.698605
200.286	200.466	62.39	-0.601649	0.73267	-1.75598	0.800367
200.289	200.469	62.391	1.48104	1.09932	0.955145	0.774428
200.29	200.47	62.392	-0.348671	1.21299	1.06551	0.963985
200.293	200.473	62.393	1.71225	0.18578	-0.312583	0.481112
200.294	200.474	62.394	1.11188	0.14841	1.23362	0.329466
200.295	200.475	62.395	-0.233963	0.360047	-0.0448499	0.0441323
200.296	200.476	62.396	-0.261641	0.266018	-0.570987	0.251648
200.297	200.477	62.397	-0.28932	0.171988	-1.09712	0.459163
200.301	200.481	62.398	0.381402	0.213903	0.772255	0.313503
200.307	200.487	62.399	0.2852	1.02474	0.821718	0.898139
200.308	200.488	62.4	1.20401	0.651669	0.108995	0.716563
200.311	200.491	62.401	1.09468	0.020124	-1.19323	0.425243
200.312	200.492	62.402	-0.411284	0.685671	0.199824	0.73053
200.363	200.543	62.403	0.341617	-0.536839	0.231684	0.0361509
200.375	200.555	62.404	0.422165	-0.565185	-0.453931	-0.267141
200.414	200.594	62.405	-0.793075	-0.698587	0.154762	-0.46468
200.473	200.653	62.406	-0.858867	0.247523	-0.541767	0.20376
200.5	200.68	62.407	-0.549798	-1.54291	1.31705	-1.47233
	200.685	62.408	-0.538303	-1.66845	0.883327	-1.61998
200.51	200.69	62.409	-0.526808	-1.79399	0.449603	-1.76764
200.521	200.701	62.41	-0.941617	-1.4567	0.762574	-1.43242
200.524	200.704	62.411	-0.550614	-1.91709	1.00549	-2.05696
200.526	200.706	62.412	-1.60011	-1.46191	0.986301	-1.81353
200.527	200.707	62.413	-2.632	-1.92694	-1.97461	-2.11682
200.546	200.726	62.414	-1.53375	-0.452661	-0.839776	-0.885697
200.547	200.727	62.415	2.374	4.06544e-05	-0.0524191	-0.855767
200.548	200.728	62.416	1.86421	2.6171	-6.31079	1.83994
200.55	200.73	62.417	2.31424	1.12455	-0.210137	0.824311
200.552	200.732	62.418	1.29083	0.869853	0.945463	0.0361509
200.553	200.733	62.419	1.94003	2.09097	1.15106	0.684637
	200.733	62.42	1.88904	1.60828	1.06613	0.484105
200.554	200.734	62.421	1.83804	1.1256	0.981196	0.283573
200.555	200.735	62.422	1.16879	0.941003	-1.11332	0.497075
200.556	200.736	62.423	2.60219	1.55288	0.915363	0.612805
200.557	200.737	62.424	1.24102	2.0793	-5.14164	1.80003
200.558	200.738	62.425	1.07006	1.1895	-4.09834	1.34909
200.559	200.739	62.426	3.40515	1.69524	0.516316	1.32913
200.564	200.744	62.427	1.57129	1.64344	0.915363	1.1735
200.565	200.745	62.428	2.15861	1.84183	-1.70599	1.9018
200.566	200.746	62.429	0.851731	3.4649	-10.0918	4.43987
200.567	200.747	62.43	1.73671	2.2013	-3.23494	2.61812
200.568	200.748	62.431	1.64605	1.91576	-1.52486	1.75314
200.57	200.75	62.432	1.55539	1.63022	0.185214	0.888162
200.573	200.753	62.433	1.20189	1.4605	0.607849	0.973962
200.574	200.754	62.434	2.11385	1.69213	-0.269633	0.900134
200.575	200.755	62.435	2.96874	2.90695	-0.192887	2.59418
200.577	200.757	62.436	1.71477	2.25001	1.23626	1.03981
200.579	200.759	62.437	1.91411	2.16685	-2.88764	1.67433
200.58	200.76	62.438	-0.417643	1.87135	-2.189	1.0877
200.583	200.763	62.439	1.92903	1.17171	1.14314	0.501066
200.585	200.765	62.44	0.134783	1.45634	-0.556553	0.287564
200.586	200.766	62.441	1.25154	1.6839	0.761166	1.14756
200.59	200.77	62.442	2.9879	3.90848	0.190495	3.81932
	200.77	62.443	3.31022	4.41949	-0.666128	4.16052
200.591	200.771	62.444	3.63253	4.9305	-1.52275	4.50173
200.592	200.772	62.445
200.593	200.773	62.446	1.04905	1.50559	-1.23391	0.911088
200.594	200.774	62.447	-0.317419	0.127671	-0.970986	-1.07216
200.596	200.776	62.448	0.921635	0.773195	-1.05905	-0.459879
200.597	200.777	62.449	1.34921	1.77967	-1.13813	1.03682
200.598	200.778	62.45	1.5449	1.6651	-0.98481	1.58193
200.599	200.779	62.451	1.06877	1.79188	-0.892126	1.71713
200.6	200.78	62.452	1.67733	1.70315	-0.544707	1.42951
200.601	200.781	62.453	0.733937	1.39479	-0.61985	0.992898
	200.781	62.454	0.509598	1.51914	-0.658577	0.834014
200.602	200.782	62.455	0.285258	1.64348	-0.697303	0.67513
200.603	200.783	62.456	1.45996	1.59301	-0.310328	1.03682
200.604	200.784	62.457	1.08095	2.02557	-0.839865	1.33306
200.605	200.785	62.458	1.38373	1.82114	-0.186894	1.02132
200.606	200.786	62.459	1.65534	1.60964	-0.532653	1.27105
200.608	200.788	62.46	1.39023	1.39874	-0.332452	1.26072
200.609	200.789	62.461	1.71423	1.25134	-0.330395	1.09882
200.61	200.79	62.462	0.920861	1.30454	-0.138171	1.32703
200.611	200.791	62.463	1.43147	1.0544	-0.203172	1.02476
200.612	200.792	62.464	0.315242	0.472375	-0.0997691	0.651879
200.613	200.793	62.465	-0.32836	-0.559922	0.468964	-0.0456608
	200.793	62.466	-0.310426	-0.460031	0.190607	0.160156
200.614	200.794	62.467	-0.292492	-0.36014	-0.0877506	0.365973
200.615	200.795	62.468	0.586184	0.169698	0.553454	0.977397
200.616	200.796	62.469	0.197473	0.03125	0.518121	0.347889
200.617	200.797	62.47	0.929325	0.38388	1.00384	0.81636
200.618	200.798	62.471	-0.18169	0.752058	-0.236845	1.13585
200.62	200.8	62.472	0.331138	0.594303	-0.552431	0.886975
200.621	200.801	62.473	1.33785	0.263288	-0.365512	0.481369
200.622	200.802	62.474	-1.19919	-0.113861	-0.349632	0.320332
200.623	200.803	62.475	0.509236	0.0416731	-0.387564	0.322916
200.624	200.804	62.476	0.48271	0.504879	-0.3671	0.55629
200.625	200.805	62.477	1.59058	0.957327	-0.328157	1.38645
	200.805	62.478	1.20078	0.721848	-0.467237	1.13628
200.626	200.806	62.479	0.810988	0.48637	-0.606316	0.886114
200.627	200.807	62.48	0.604246	0.96958	-0.797927	1.15135
200.628	200.808	62.481	-0.575716	-0.0971811	-1.05638	-0.0534113
200.629	200.809	62.482	-0.388173	-0.449666	-0.329132	-0.496047
200.631	200.811	62.483	-0.57871	-0.971869	0.202679	-1.13761
200.632	200.812	62.484	0.834779	0.7852	-0.159537	1.40195
200.633	200.813	62.485	0.328402	0.176608	0.000529654	0.152406
200.634	200.814	62.486	-2.10119	-0.44849	-0.0362117	-0.202392
200.635	200.815	62.487	-0.0105067	0.311194	-0.204976	0.756079
200.636	200.816	62.488	0.0522485	0.176898	0.172254	0.406448
	200.816	62.489	0.677065	0.443283	0.143976	0.728091
200.637	200.817	62.49	1.30188	0.709669	0.115698	1.04973
200.638	200.818	62.491	0.398847	0.0603564	-0.0984698	0.153267
200.639	200.819	62.492	-0.574168	-0.205985	-0.157552	-0.0861353
200.64	200.82	62.493	-0.460424	0.183474	0.0813389	0.147239
200.641	200.821	62.494	0.486787	0.0357792	0.0622825	-0.0422162
200.643	200.823	62.495	0.502372	0.204916	-0.0270083	0.0283989
200.644	200.824	62.496	0.415052	0.700421	0.146196	0.871474
200.645	200.825	62.497	-1.2333	-0.225482	-0.113304	-0.552023
200.646	200.826	62.498	0.0051305	0.36196	0.151465	0.240244
200.647	200.827	62.499	-0.377955	0.353177	0.0297639	0.554567
200.648	200.828	62.5	0.397144	0.518031	-0.350498	0.492564
	200.828	62.501	-0.206823	-0.171863	-0.552377	-0.358692
200.649	200.829	62.502	-0.81079	-0.861758	-0.754256	-1.20995
200.65	200.83	62.503	0.591241	-0.467769	-1.00953	-0.595942
200.651	200.831	62.504	0.497986	0.339981	-0.785439	0.183408
200.652	200.832	62.505	1.14737	0.34393	-0.764939	0.0525114
200.654	200.834	62.506	-0.203262	-0.453978	-0.779448	-0.970546
200.655	200.835	62.507	-0.253786	-0.847952	-0.916488	-1.16603
200.656	200.836	62.508	0.657661	0.709335	-0.533555	0.531316
200.657	200.837	62.509	-0.10304	0.28997	-0.92349	0.0860966
200.658	200.838	62.51	-0.639916	0.595261	-1.10803	0.0378716
200.659	200.839	62.511	0.856248	1.09501	-0.46083	0.92056
200.66	200.84	62.512	0.591912	0.399384	-0.616891	0.166184
	200.84	62.513	0.238785	0.25272	-0.539889	0.0826519
200.661	200.841	62.514	-0.114342	0.106056	-0.462888	-0.000880541
200.662	200.842	62.515	0.491896	0.499086	-0.442532	0.124849
200.663	200.843	62.516	1.96876	0.871881	-0.338949	0.822388
200.664	200.844	62.517	0.529621	0.627851	-0.22692	0.245411
200.666	200.846	62.518	-0.0601019	-0.871702	-0.919556	-1.8894
200.667	200.847	62.519	0.997705	-0.32395	-1.11131	-0.916293
200.668	200.848	62.52	-0.434311	0.558911	-0.547306	0.0275377
200.669	200.849	62.521	-0.437768	0.199341	0.103391	-0.0783849
200.67	200.85	62.522	-0.188915	0.11883	-0.0923704	0.0172038
200.671	200.851	62.523	1.57432	0.947557	-0.0527778	0.775885
	200.851	62.524	-0.184374	0.309517	-0.176302	0.187713
200.672	200.852	62.525	-1.94307	-0.328523	-0.299825	-0.400459
200.673	200.853	62.526	0.0114783	0.159173	0.628308	-1.94e-05
200.674	200.854	62.527	-1.07817	0.0649292	0.344447	-0.348789
200.675	200.855	62.528	-0.416506	0.321791	0.283236	0.365112
200.676	200.856	62.529	-0.28021	0.30035	0.148253	0.171351
200.678	200.858	62.53	-1.80558	-0.54256	0.0748785	-0.877541
200.679	200.859	62.531	0.202273	0.26024	-0.0222442	0.0619841
200.68	200.86	62.532	1.14871	0.989323	-0.101899	0.913671
200.681	200.861	62.533	-0.47281	0.359811	0.0961004	0.0197873
200.682	200.862	62.534	0.530241	0.57469	0.183875	0.653601
200.683	200.863	62.535	0.109224	-0.26398	0.163123	-0.204114
	200.863	62.536	-0.808442	-0.69003	0.0508595	-0.709615
200.684	200.864	62.537	-1.72611	-1.11608	-0.0614037	-1.21512
200.685	200.865	62.538	1.15877	0.344322	-0.0270805	0.511509
200.686	200.866	62.539	0.497521	0.165256	-0.188807	0.530455
200.687	200.867	62.54	1.61705	1.02444	-0.287987	1.08504
200.689	200.869	62.541	-0.582735	0.196017	-0.351473	0.330666
200.69	200.87	62.542	0.588816	0.500567	-0.0653016	1.04543
200.691	200.871	62.543	0.955387	0.921659	-0.259439	0.961896
200.692	200.872	62.544	0.649868	0.75515	-0.268137	0.856835
200.693	200.873	62.545	0.00946555	0.199443	-0.0807488	0.193742
200.694	200.874	62.546	0.481265	0.674857	-0.376845	0.685464
200.695	200.875	62.547	-0.232214	0.931008	-0.332524	0.990314
	200.875	62.548	0.0697952	0.988386	-0.316391	1.00366
200.696	200.876	62.549	0.371805	1.04576	-0.300258	1.01701
200.697	200.877	62.55	-0.0937502	0.00350816	-0.148312	-0.0783849
200.698	200.878	62.551	0.622258	0.164065	0.0870414	0.621738
200.699	200.879	62.552	0.812381	0.460776	0.209248	0.973091
200.701	200.881	62.553	0.40055	0.62444	-0.138026	0.766413
200.702	200.882	62.554	-0.688738	-0.817946	0.108949	-0.204975
200.703	200.883	62.555	0.298108	0.123011	0.0359356	0.597625
200.704	200.884	62.556	-0.41759	0.20975	-0.0595269	0.216132
200.705	200.885	62.557	0.801853	0.389411	-0.116516	0.237661
200.706	200.886	62.558	0.156858	0.742564	0.239132	0.848223
	200.887	62.559	-0.397463	0.448451	0.390248	0.468451
200.707	200.887	62.56	-0.951783	0.154339	0.541364	0.0886801
200.708	200.888	62.561	0.604969	0.777956	0.193801	0.815499
200.709	200.889	62.562	1.19882	0.436722	0.0994931	0.654462
200.71	200.89	62.563	0.301205	0.500712	0.153414	0.573513
200.711	200.891	62.564	-0.713355	0.0125232	-0.0470753	0.0895412
200.713	200.893	62.565	2.23841	0.387306	-0.0275858	0.756079
200.714	200.894	62.566	-1.02228	-1.21154	-1.04591	-1.95657
200.715	200.895	62.567	-1.65876	-0.560459	-0.581124	-0.417682
200.716	200.896	62.568	-0.497014	-0.855298	-0.412865	-1.17981
200.717	200.897	62.569	-0.059431	-0.441914	-0.268029	-0.581302
200.718	200.898	62.57	-2.09681	-1.37319	-0.423512	-1.24698
	200.899	62.571	-1.57131	-1.23568	-0.393844	-1.12082
200.719	200.899	62.572	-1.04581	-1.09818	-0.364177	-0.994659
200.72	200.9	62.573	-0.821215	-0.676217	-0.613137	-0.95849
200.721	200.901	62.574	-2.38999	-1.36338	-0.748445	-1.57939
200.722	200.902	62.575	0.336556	-0.639068	-0.358474	-0.12661
200.724	200.904	62.576	0.00327261	0.614322	0.172687	0.894726
200.725	200.905	62.577	0.19546	-0.148194	0.0305218	-0.511548
200.726	200.906	62.578	-0.114858	-0.033931	0.103499	-0.471935
200.727	200.907	62.579	-1.20915	-1.22332	-0.402073	-1.59833
200.728	200.908	62.58	0.785493	-1.22062	0.0478098	-1.18325
200.729	200.909	62.581	0.411697	-0.472922	0.300343	-0.621777
200.73	200.91	62.582	0.949658	0.39696	0.0626074	0.0499279
	200.911	62.583	0.101018	-0.0409717	0.220238	-0.25277
200.731	200.911	62.584	-0.747622	-0.478903	0.377868	-0.555467
200.732	200.912	62.585	-0.146442	-0.333647	0.704281	-0.749228
200.733	200.913	62.586	0.350542	0.0385229	0.349645	-0.329844
200.734	200.914	62.587	-1.11306	-0.616059	-0.185667	-0.980019
200.736	200.916	62.588	-1.27753	-0.856212	-0.490389	-0.877541
200.737	200.917	62.589	-0.811771	-0.997796	-0.386482	-1.22631
200.738	200.918	62.59	-0.801501	-0.38209	-0.64248	-1.14536
200.739	200.919	62.591	-1.36016	-0.915267	-0.661284	-1.48724
200.74	200.92	62.592	-1.22345	-0.773379	-0.93291	-1.57164
200.741	200.921	62.593	-0.0294468	-0.902986	-0.0528139	-0.790564
	200.922	62.594	-0.492628	-0.716589	0.204718	-0.64675
200.742	200.922	62.595	-0.955808	-0.530192	0.462251	-0.502937
200.743	200.923	62.596	-1.95504	-2.46283	-0.364863	-2.40265
200.744	200.924	62.597	-1.01118	-1.84287	-0.483821	-1.61211
200.745	200.925	62.598	-1.28424	-0.645282	-0.525218	-1.18498
200.746	200.926	62.599	-0.61179	-1.01297	-0.228472	-1.66636
200.748	200.928	62.6	0.759741	-9.21e-05	-0.231359	-0.689808
200.749	200.929	62.601	-0.576026	-0.607784	-0.524821	-1.32793
200.75	200.93	62.602	0.529363	-0.135419	-0.427915	-0.773341
200.751	200.931	62.603	-0.372123	-0.662455	-0.703475	-1.40027
200.752	200.932	62.604	-1.71295	-0.957352	-0.369085	-1.04202
200.753	200.933	62.605	0.826315	-0.0976602	-0.129112	-0.430599
	200.934	62.606	0.0919866	-0.396919	-0.351906	-1.0614
200.754	200.934	62.607	-0.642342	-0.696178	-0.5747	-1.6922
200.755	200.935	62.608	-0.923657	-2.14253	0.255914	-2.32773
200.756	200.936	62.609	-1.60338	-0.721016	0.203581	-1.02308
200.757	200.937	62.61	-1.43819	-1.41558	0.316548	-1.29606
200.759	200.939	62.611	0.36298	0.00211453	0.495527	0.0886801
200.76	200.94	62.612	0.158561	0.152365	0.296518	0.204075
200.761	200.941	62.613	-0.661747	-0.0428734	0.0740845	0.012898
200.762	200.942	62.614	-0.30333	-1.09653	1.13955	-0.881847
200.763	200.943	62.615	0.33155	-0.341428	1.31975	-0.62436
200.764	200.944	62.616	0.407827	0.232135	0.880517	0.544234
200.765	200.945	62.617	0.608582	-0.0662456	0.627081	0.161879
	200.946	62.618	0.294186	-0.216597	0.935431	-0.0805378
200.766	200.946	62.619	-0.020209	-0.366949	1.24378	-0.322954
200.767	200.947	62.62	-0.4821	-1.12848	1.74928	-0.997242
200.768	200.948	62.621	-1.28445	-0.815899	1.78743	-0.763007
200.769	200.949	62.622	-0.800314	-0.928869	1.41832	-0.863763
200.771	200.951	62.623	-0.345752	-0.506123	1.2423	-0.72856
200.772	200.952	62.624	-1.2411	-0.541341	1.2161	-0.861179
200.773	200.953	62.625	-0.182825	0.088824	1.05773	-0.398736
200.774	200.954	62.626	0.452571	0.386566	0.0308467	0.662212
200.775	200.955	62.627	0.333615	0.962103	-0.145858	1.43123
200.776	200.956	62.628	1.73116	0.755049	0.205422	1.42348
	200.957	62.629	0.823735	0.438979	0.211955	0.975244
200.777	200.957	62.63	-0.0836867	0.12291	0.218487	0.52701
200.778	200.958	62.631	0.580094	0.492873	0.134719	1.2323
200.779	200.959	62.632	1.5142	0.745714	0.335858	1.34081
200.78	200.96	62.633	-0.431524	0.407949	0.270459	0.737133
200.781	200.961	62.634	0.994144	1.1053	0.101586	1.96945
200.783	200.963	62.635	0.846442	1.04289	0.237075	1.66288
200.784	200.964	62.636	1.03011	0.294398	0.866153	0.80172
200.785	200.965	62.637	-1.54357	-0.532093	1.1507	-0.062884
200.786	200.966	62.638	-0.0455485	0.306883	0.143381	0.769857
200.787	200.967	62.639	-0.820905	-0.795314	2.55809	-0.292814
200.788	200.968	62.64	0.0695888	0.009402	0.360941	0.744884
	200.969	62.641	0.432908	0.167571	0.301372	0.563179
200.789	200.969	62.642	0.796228	0.32574	0.241803	0.381474
200.79	200.97	62.643	0.0175164	0.397816	0.0845511	0.637239
200.791	200.971	62.644	-0.799024	0.188947	-0.0711484	0.328082
200.792	200.972	62.645	1.08374	0.759984	-0.195412	1.13499
200.794	200.974	62.646	1.10474	0.672723	-0.359196	1.49495
200.795	200.975	62.647	-0.239078	0.754874	-0.382908	0.472757
200.796	200.976	62.648	-0.0463226	0.525943	-0.246843	0.915393
200.797	200.977	62.649	-0.682957	0.50816	-0.440042	1.05146
200.798	200.978	62.65	-0.437046	0.321182	-4.78e-05	0.826694
200.799	200.979	62.651	-0.0280534	0.770103	-0.0618729	1.24005
200.8	200.98	62.652	-0.163163	-0.260308	1.32701	-0.204975
	200.981	62.653	0.480465	0.219563	0.811582	0.362959
200.801	200.981	62.654	1.12409	0.699434	0.296157	0.930894
200.802	200.982	62.655	1.53819	1.05021	0.234296	1.33478
200.803	200.983	62.656	0.615291	1.46074	-0.43802	1.42434
200.804	200.984	62.657	1.35736	1.45428	-0.427698	1.52768
200.806	200.986	62.658	1.86771	1.08875	-0.262687	1.46395
200.807	200.987	62.659	-1.01263	0.188715	-0.315381	0.0473444
200.808	200.988	62.66	0.948265	0.778247	-0.571451	1.07212
200.809	200.989	62.661	1.34998	1.51086	-0.50461	1.86439
200.81	200.99	62.662	1.15372	0.806467	0.0984103	1.30722
200.811	200.991	62.663	0.745859	0.396336	-0.00492019	0.915393
	200.992	62.664	0.154974	0.322699	0.0903438	0.663935
200.812	200.992	62.665	-0.435911	0.249062	0.185608	0.412476
200.813	200.993	62.666	2.0728	0.264392	0.565581	0.518399
200.814	200.994	62.667	0.85568	0.660805	0.326943	0.719049
200.815	200.995	62.668	1.50878	0.141245	0.537285	0.889559
200.816	200.996	62.669	1.01169	0.823975	0.269016	1.50873
200.818	200.998	62.67	1.25342	0.176376	0.539956	0.539928
200.819	200.999	62.671	-0.549448	-0.4769	0.245664	0.225604
200.82	201	62.672	0.232515	0.291901	0.304133	0.884392
200.821	201.001	62.673	0.799789	0.898621	-0.21584	1.01787
200.822	201.002	62.674	0.73306	0.933273	0.0122955	0.806026
200.823	201.003	62.675	0.561876	0.0353873	0.405803	0.616571
	201.004	62.676	-0.296208	-0.40086	0.588752	0.205367
200.824	201.004	62.677	-1.15429	-0.837108	0.771701	-0.205837
200.825	201.005	62.678	0.273646	-0.105993	0.721894	0.418504
200.826	201.006	62.679	0.523841	0.21621	0.496574	0.11107
200.827	201.007	62.68	0.157735	-0.738683	1.31073	-0.302286
200.829	201.009	62.681	-0.0730555	-1.27147	1.52732	-0.471935
200.83	201.01	62.682	0.547994	0.831509	-0.644212	0.516676
200.831	201.011	62.683	2.95328	1.36637	-1.10337	0.700103
200.832	201.012	62.684	0.840765	0.907026	-0.845351	0.369418
200.833	201.013	62.685	0.922925	1.33513	-0.565965	0.695798
200.834	201.014	62.686	0.5498	0.868237	-0.525362	-0.0594394
200.835	201.015	62.687	0.47951	0.614946	-0.760103	0.340139
	201.016	62.688	1.01665	1.15673	-0.960989	0.594611
200.836	201.016	62.689	1.55378	1.69852	-1.16188	0.849084
200.837	201.017	62.69	0.648939	1.57334	-1.11398	0.243689
200.838	201.018	62.691	1.22839	1.07478	-0.909017	0.800859
200.839	201.019	62.692	0.31132	0.220463	-0.446971	0.0516502
200.841	201.021	62.693	0.579681	0.651935	-0.771941	0.452089
200.842	201.022	62.694	0.274833	0.562279	-0.579464	0.485675
200.843	201.023	62.695	0.479975	0.272608	-0.107962	-0.00432518
200.844	201.024	62.696	0.130228	0.234937	0.0375236	0.00342526
200.845	201.025	62.697	0.435592	0.65179	-0.381681	0.377169
200.846	201.026	62.698	1.16724	0.709117	-0.261604	0.156712
	201.026	62.699	0.630644	0.386109	-0.328103	-0.0344658
200.847	201.027	62.7	0.0940509	0.0631001	-0.394602	-0.225643
200.848	201.028	62.701	0.806962	0.688634	-0.56712	0.277274
200.849	201.029	62.702	-0.0795064	0.276658	-0.477613	-0.221337
200.85	201.03	62.703	0.81171	0.486384	-0.0813263	0.672546
200.851	201.031	62.704	-0.999572	-0.147177	-0.542867	-0.521882
200.853	201.033	62.705	-1.10568	-0.213128	-0.517314	-0.855151
200.854	201.034	62.706	-0.865185	-0.272037	0.216286	0.253162
200.855	201.035	62.707	-1.41078	-0.885174	-0.0385937	-0.541689
200.856	201.036	62.708	-0.858528	0.0995956	0.00197332	0.239383
200.857	201.037	62.709	0.945168	0.300887	-0.108539	0.64585
200.858	201.038	62.71	-0.0133451	0.300176	-0.217067	0.151545
	201.038	62.711	-0.567253	0.185412	-0.269869	0.0632759
200.859	201.039	62.712	-1.12116	0.0706489	-0.322671	-0.024993
200.86	201.04	62.713	-0.287073	0.491625	-0.312818	0.0258154
200.861	201.041	62.714	1.59517	1.23373	-0.655834	1.11002
200.862	201.042	62.715	-1.70123	-0.113237	-0.78912	-0.248033
200.864	201.044	62.716	-0.600488	-0.443337	-1.46284	-0.639861
200.865	201.045	62.717	1.34642	0.468282	-1.31425	0.415921
200.866	201.046	62.718	-0.385799	-0.308693	-1.12654	-0.687225
200.867	201.047	62.719	-1.11337	-1.36259	-1.25153	-2.40265
200.868	201.048	62.72	0.669014	0.593098	-0.859066	0.534761
200.869	201.049	62.721	0.0312441	1.06317	-0.906671	0.546817
	201.049	62.722	0.585461	0.938397	-0.901348	0.421088
200.87	201.05	62.723	1.13968	0.813624	-0.896024	0.295358
200.871	201.051	62.724	0.631547	0.948443	-0.866609	0.613126
200.872	201.052	62.725	0.736053	0.652167	-0.737762	0.462423
200.873	201.053	62.726	-0.551512	0.248684	-0.96864	-0.084413
200.874	201.054	62.727	-0.891144	-0.880906	-1.1256	-1.12383
200.876	201.056	62.728	-0.624795	-0.261077	-1.14585	-0.666557
200.877	201.057	62.729	0.12966	0.130429	-1.21923	-0.350511
200.878	201.058	62.73	-0.848619	-0.505527	-1.49778	-1.10833
200.879	201.059	62.731	-1.01185	-1.18909	-1.33714	-2.03408
200.88	201.06	62.732	-1.26613	-0.935925	-1.04927	-1.45538
200.881	201.061	62.733	-1.95855	-1.20613	-1.28982	-1.84893
	201.061	62.734	-2.00861	-1.49709	-1.31976	-2.17832
200.882	201.062	62.735	-2.05867	-1.78805	-1.3497	-2.50772
200.883	201.063	62.736	-0.135553	-1.01327	-1.04497	-1.0868
200.884	201.064	62.737	-2.46446	-1.75508	-1.19537	-2.13311
200.885	201.065	62.738	-2.20962	-1.78807	-1.25358	-2.40265
200.886	201.066	62.739	-1.47947	-1.9626	-1.45548	-3.26554
200.888	201.068	62.74	0.445294	-0.158747	-1.21987	-1.17464
200.889	201.069	62.741	-0.453664	-0.104091	-1.36688	-1.18928
200.89	201.07	62.742	-0.706542	-0.648388	-1.3546	-1.97121
200.891	201.071	62.743	0.400395	-0.0919696	-1.33934	-1.29865
200.892	201.072	62.744	-0.8095	-0.715819	-1.38951	-1.42266
200.893	201.073	62.745	-1.23877	-0.793964	-1.47623	-1.65345
	201.073	62.746	-1.06705	-0.635454	-1.48932	-1.6457
200.894	201.074	62.747	-0.895324	-0.476944	-1.5024	-1.63795
200.895	201.075	62.748	-1.3632	-0.728159	-1.47569	-1.58628
200.896	201.076	62.749	-2.09485	-0.809526	-1.39427	-1.73439
200.897	201.077	62.75	-0.227621	-0.647764	-1.44494	-1.47174
200.899	201.079	62.751	-0.410829	-0.493856	-1.32649	-1.1023
200.9	201.08	62.752	-1.41347	-1.22017	-1.50666	-2.32171
200.901	201.081	62.753	-1.80615	-1.62869	-1.3973	-2.41385
200.902	201.082	62.754	-1.93517	-0.955116	-1.50511	-1.56389
200.903	201.083	62.755	-1.27077	-0.238329	-1.63305	-1.00413
200.904	201.084	62.756	-1.58584	-0.730031	-1.69398	-1.79726
	201.084	62.757	-0.929282	-0.390989	-1.6699	-1.3473
200.905	201.085	62.758	-0.272726	-0.0519464	-1.64583	-0.897348
200.906	201.086	62.759	0.809594	0.921601	-1.24915	1.10313
200.907	201.087	62.76	0.329744	0.102136	-1.24388	-0.172251
200.908	201.088	62.761	-0.91736	-0.0604388	-1.35284	-0.369457
200.909	201.089	62.762	-0.32676	0.418793	-1.4331	0.143794
200.911	201.091	62.763	-1.67527	-0.440579	-1.53218	-0.533077
200.912	201.092	62.764	-0.668559	-1.0285	-1.53885	-1.41835
200.913	201.093	62.765	0.0805296	0.806467	-1.36662	0.396975
200.914	201.094	62.766	-0.647916	-0.00478101	-1.42607	-0.453851
200.915	201.095	62.767	-0.638471	-0.952648	-1.32407	-1.30554
200.916	201.096	62.768	-0.779155	-0.169475	-1.28058	-0.195503
	201.096	62.769	-0.565111	-0.202886	-1.31902	-0.4461
200.917	201.097	62.77	-0.351067	-0.236297	-1.35746	-0.696698
200.918	201.098	62.771	-0.660766	-0.87658	-1.6014	-1.57853
200.919	201.099	62.772	0.712417	0.717188	-1.57022	0.0619841
200.92	201.1	62.773	-2.15631	-0.834045	-1.53077	-1.38132
200.922	201.102	62.774	-2.19584	-1.26212	-1.13639	-1.10403
200.923	201.103	62.775	-0.848206	-1.1999	1.03932	-1.42093
200.924	201.104	62.776	-1.4451	-0.429023	1.39641	-0.326399
200.925	201.105	62.777	-1.37115	-1.0448	1.52425	-0.204975
200.926	201.106	62.778	-3.35124	-2.58841	2.67806	-1.97552
200.927	201.107	62.779	-2.1946	-2.49469	2.86758	-2.01686
200.928	201.108	62.78	-0.564724	-1.66928	2.59913	-0.789703
	201.108	62.781	0.354877	-0.922148	2.12442	0.219146
200.929	201.109	62.782	1.27448	-0.175021	1.6497	1.22799
200.93	201.11	62.783	-2.15863	-2.78441	3.11539	-2.0091
200.931	201.111	62.784	-1.49263	-1.35318	1.46712	0.0456221
200.932	201.112	62.785	-1.04555	-1.11098	0.727488	0.337555
200.934	201.114	62.786	-1.24089	-0.924601	1.01427	0.127432
200.935	201.115	62.787	-0.956531	-1.09798	1.73445	-0.0189649
200.936	201.116	62.788	-0.509555	-0.440738	0.739543	0.847362
200.937	201.117	62.789	-0.849703	-0.778387	0.8249	0.285024
200.938	201.118	62.79	-0.900794	-1.03513	1.36133	-0.08958
200.939	201.119	62.791	-1.21555	-0.753433	0.727236	-0.00432518
	201.119	62.792	-1.00984	-0.570142	0.549827	0.219576
200.94	201.12	62.793	-0.804133	-0.386852	0.372418	0.443478
200.941	201.121	62.794	-1.11791	-0.367544	0.448536	0.206659
200.942	201.122	62.795	-1.02646	-0.404214	0.692696	0.526149
200.943	201.123	62.796	-1.03374	-0.686524	0.466654	0.569207
200.944	201.124	62.797	0.259403	0.0472621	0.322323	0.765552
200.946	201.126	62.798	-0.0536509	-0.00119532	-0.0359951	0.370279
200.947	201.127	62.799	0.87493	0.99915	-0.0673227	1.48204
200.948	201.128	62.8	-0.697201	-0.148498	0.509856	0.359084
200.949	201.129	62.801	0.66824	0.393636	0.375125	0.75694
200.95	201.13	62.802	-0.682493	0.595769	-0.0612232	0.823249
200.951	201.131	62.803	0.0678341	0.399297	0.293775	1.10829
	201.131	62.804	0.926125	0.753931	0.073868	1.25426
200.952	201.132	62.805	1.78442	1.10856	-0.146039	1.40023
200.953	201.133	62.806	0.37614	1.00817	0.167382	1.2435
200.954	201.134	62.807	-1.1449	-1.49766	0.956057	-0.207559
200.955	201.135	62.808	-2.99282	-2.29673	1.1503	-0.511548
200.957	201.137	62.809	-1.87335	-2.76199	1.36992	-1.16086
200.958	201.138	62.81	-0.989302	-2.3453	1.32784	-0.821566
200.959	201.139	62.811	-1.43143	-1.94774	1.07816	-0.644167
200.96	201.14	62.812	-2.35304	-1.77645	0.644008	-0.436627
200.961	201.141	62.813	-2.45579	-1.48125	0.656207	-0.269562
200.962	201.142	62.814	-1.32821	-1.16882	0.891958	0.241966
200.963	201.143	62.815	-1.86607	-1.15726	0.654583	-0.10422
	201.143	62.816	-1.71604	-1.21976	0.560745	0.0236625
200.964	201.144	62.817	-1.56602	-1.28225	0.466906	0.151545
200.965	201.145	62.818	-1.67631	-1.24345	0.416847	-0.149861
200.966	201.146	62.819	-1.67584	-1.54578	0.478456	-0.167946
200.967	201.147	62.82	-1.4901	-1.0886	0.407139	-0.0534113
200.969	201.149	62.821	-1.29554	-1.10169	0.194595	-0.457295
200.97	201.15	62.822	0.253261	-0.884912	0.294966	-0.43835
200.971	201.151	62.823	-1.78272	-1.27948	0.595646	-0.610582
200.972	201.152	62.824	-0.523386	-0.140906	0.349717	0.698381
200.973	201.153	62.825	0.250216	-0.192398	0.0635818	0.629488
200.974	201.154	62.826	0.756283	0.0450556	0.502493	0.402142
	201.155	62.827	0.834753	0.0653647	0.426195	0.37846
200.975	201.155	62.828	0.913223	0.0856739	0.349897	0.354778
200.976	201.156	62.829	1.4083	0.715911	-0.105002	1.08849
200.977	201.157	62.83	0.324841	0.50424	-0.212772	0.638961
200.978	201.158	62.831	-0.857547	0.0399746	-0.0899883	0.254023
200.979	201.159	62.832	0.0478618	0.179526	0.207046	0.16274
200.981	201.161	62.833	0.791015	0.79693	-0.0232548	0.719049
200.982	201.162	62.834	1.2286	0.971568	0.107758	0.744023
200.983	201.163	62.835	1.54542	0.395915	0.627839	0.118821
200.984	201.164	62.836	0.277414	0.115898	0.490474	-0.276452
200.985	201.165	62.837	0.246501	0.985984	0.0436953	0.308276
200.986	201.166	62.838	-0.0961242	0.23379	1.4276	-0.577858
	201.167	62.839	0.367005	0.445962	1.04611	-0.254061
200.987	201.167	62.84	0.830134	0.658134	0.664617	0.0697346
200.988	201.168	62.841	0.470169	0.925535	-0.129725	0.0275377
200.989	201.169	62.842	0.829876	1.51753	-0.3828	0.904198
200.99	201.17	62.843	0.259093	1.17893	-0.157335	0.58643
200.992	201.172	62.844	0.493031	0.927524	-0.0283076	0.387502
200.993	201.173	62.845	0.614981	0.609952	0.757914	-0.174835
200.994	201.174	62.846	0.276794	0.940125	0.000204827	0.478785
200.995	201.175	62.847	0.395802	0.0977229	-0.0240849	-0.12661
200.996	201.176	62.848	1.38729	0.65012	-0.853255	0.331527
200.997	201.177	62.849	0.363031	0.640946	-0.679402	0.0680122
200.998	201.178	62.85	0.113713	0.28052	-0.774034	-0.295397
	201.179	62.851	0.598131	0.558076	-0.718092	0.0998751
200.999	201.179	62.852	1.08255	0.835632	-0.66215	0.495147
201	201.18	62.853	-0.7068	0.592038	-0.680521	-0.0887188
201.001	201.181	62.854	0.486735	0.700828	-0.820484	0.223021
201.002	201.182	62.855	0.0826455	0.447624	-0.162966	-0.421126
201.004	201.184	62.856	-0.0925632	0.282755	-0.156614	-0.123165
201.005	201.185	62.857	0.318339	0.880388	-0.383883	0.349611
201.006	201.186	62.858	-0.331095	0.552814	-0.333535	0.155851
201.007	201.187	62.859	0.848713	0.382821	-0.0462452	0.231633
201.008	201.188	62.86	0.623909	0.603594	0.699842	0.49687
201.009	201.189	62.861	0.794576	1.10118	0.391403	0.780191
	201.19	62.862	0.555838	0.761095	0.308699	0.476633
201.01	201.19	62.863	0.3171	0.421014	0.225994	0.173074
201.011	201.191	62.864	0.203924	0.167578	0.222746	0.43056
201.012	201.192	62.865	1.17885	0.674944	0.686957	0.471035
201.013	201.193	62.866	1.55481	0.548647	0.190552	0.872335
201.014	201.194	62.867	0.951619	0.28203	0.365417	0.139488
201.016	201.196	62.868	0.453551	-0.396476	0.3242	-0.0370492
201.017	201.197	62.869	1.38482	0.190079	0.659672	0.100736
201.018	201.198	62.87	1.83876	0.371221	0.657795	0.743161
201.019	201.199	62.871	0.11392	0.463926	0.305541	0.56404
201.02	201.2	62.872	0.458093	0.503064	1.23829	-0.105081
201.021	201.201	62.873	0.118771	0.684816	-0.464223	0.490842
	201.202	62.874	0.781545	0.6717	-0.0751366	0.821958
201.022	201.202	62.875	1.44432	0.658584	0.31395	1.15307
201.023	201.203	62.876	-0.192528	-0.27105	0.36354	0.124849
201.024	201.204	62.877	-0.110213	0.121879	0.509314	-0.0697733
201.025	201.205	62.878	-0.0409037	0.596655	0.208093	0.469313
201.027	201.207	62.879	-0.513426	-0.405027	1.02214	-0.0758014
201.028	201.208	62.88	-2.08045	-0.847763	1.24764	-0.734589
201.029	201.209	62.881	-1.91561	-1.47971	1.45683	-1.14106
201.03	201.21	62.882	-0.608178	-0.847676	1.00904	-0.559773
201.031	201.211	62.883	-0.167704	-0.05244	0.472248	-0.179141
201.032	201.212	62.884	0.189577	-0.258435	0.0758169	-0.419404
201.033	201.213	62.885	0.74333	-0.201253	-0.177114	-0.508965
	201.214	62.886	-0.303588	-0.801484	-0.380653	-1.41017
201.034	201.214	62.887	-1.35051	-1.40171	-0.584192	-2.31137
201.035	201.215	62.888	-0.312258	-1.75821	-0.970553	-2.61622
201.036	201.216	62.889	-0.877261	-4.43025	-1.12023	-5.12478
201.037	201.217	62.89	-0.457844	-4.15148	-1.0274	-4.78462
201.039	201.219	62.891	-0.646109	-1.75654	-0.896277	-2.41041
201.04	201.22	62.892	-2.20044	-1.47099	-0.129725	-1.619
201.041	201.221	62.893	0.534885	-0.0826497	0.734238	-0.0232707
201.042	201.222	62.894	1.00426	0.743827	0.4062	0.666518
201.043	201.223	62.895	-0.325676	-0.0838111	0.952556	0.0533725
201.044	201.224	62.896	-1.57474	-1.052	0.386602	-1.00672
	201.225	62.897	-0.636252	-0.642872	-0.139452	-0.634263
201.045	201.225	62.898	0.302237	-0.233742	-0.665506	-0.261812
201.046	201.226	62.899	-1.22443	-1.0396	0.029006	-0.930072
201.047	201.227	62.9	1.22055	0.499754	0.191527	1.04887
201.048	201.228	62.901	-1.95096	-0.982756	-0.381537	-1.24698
201.049	201.229	62.902	-1.77147	-1.50664	-0.876282	-2.17273
201.051	201.231	62.903	-0.548983	-0.100201	-0.207683	0.470174
201.052	201.232	62.904	-0.124818	-0.174324	0.195461	-0.155028
201.053	201.233	62.905	-1.53129	-0.838371	0.148469	-0.985186
201.054	201.234	62.906	-0.367117	-0.878568	-0.214216	-1.04547
201.055	201.235	62.907	0.00167277	0.211797	-0.903242	0.17049
201.056	201.236	62.908	-1.53294	-0.215697	-1.17938	-0.652778
	201.237	62.909	-1.29639	-0.624276	-1.20168	-1.03556
201.057	201.237	62.91	-1.05985	-1.03285	-1.22399	-1.41835
201.058	201.238	62.911	0.223432	-0.206087	-1.20417	-0.316926
201.059	201.239	62.912	-0.747158	-0.285349	-1.24759	-0.655362
201.06	201.24	62.913	0.595576	-0.717198	-0.969362	-1.28401
201.062	201.242	62.914	0.274885	-0.427281	-1.0981	-0.651056
201.063	201.243	62.915	-1.54832	-0.77634	-1.07064	-1.14106
201.064	201.244	62.916	-1.33575	-1.93617	-0.592998	-2.6145
201.065	201.245	62.917	-1.43287	-0.505571	0.0363326	-0.97313
201.066	201.246	62.918	-0.527927	-0.261774	-0.0932366	-0.392708
201.067	201.247	62.919	-0.347351	-0.745942	-0.645981	-0.841372
201.068	201.248	62.92	-0.993431	-0.53128	-0.836364	-0.514993
	201.249	62.921	-1.34165	-0.894486	-0.782191	-1.15527
201.069	201.249	62.922	-1.68988	-1.25769	-0.728017	-1.79554
201.07	201.25	62.923	-0.748035	-0.187433	-0.493529	0.386641
201.071	201.251	62.924	-0.103246	0.629521	-0.153257	0.813777
201.072	201.252	62.925	0.714687	0.924534	-0.399691	1.2745
201.074	201.254	62.926	0.247997	0.233674	-0.422573	-0.0542724
201.075	201.255	62.927	2.2637	0.468412	0.030991	0.867168
201.076	201.256	62.928	0.526009	0.888836	-0.74646	1.11346
201.077	201.257	62.929	-0.458205	-0.320495	-0.287843	0.119682
201.078	201.258	62.93	-0.476836	-0.0674215	-0.236232	0.0232319
201.079	201.259	62.931	0.15949	-0.79903	-0.504718	-0.73545
	201.26	62.932	-0.365337	-0.840803	-0.288168	-0.749659
201.08	201.26	62.933	-0.890163	-0.882575	-0.0716176	-0.763868
201.081	201.261	62.934	-3.35681	-2.53634	0.299333	-2.91246
201.082	201.262	62.935	0.362618	-1.13695	-0.363419	-1.44849
201.083	201.263	62.936	-1.05397	-0.876681	-0.212844	-0.718227
201.084	201.264	62.937	-0.485402	-0.780347	1.52869	-0.359123
201.086	201.266	62.938	0.37325	0.196583	0.510216	0.783636
201.087	201.267	62.939	0.781416	0.64668	-0.0786916	1.00237
201.088	201.268	62.94	0.238089	-0.338713	0.0824217	-0.161056
201.089	201.269	62.941	0.310236	-0.00952804	0.608999	0.19977
201.09	201.27	62.942	0.326699	-0.442393	0.579801	-0.115415
201.091	201.271	62.943	0.474453	0.0741474	0.57446	0.198047
	201.272	62.944	0.561696	-0.0814666	0.552011	-0.108526
201.092	201.272	62.945	0.648939	-0.237081	0.529562	-0.415098
201.093	201.273	62.946	-0.697614	-1.36136	-0.789373	-2.62139
201.094	201.274	62.947	1.43291	1.10999	-0.789878	-0.164501
201.095	201.275	62.948	0.921687	1.60124	-0.467363	1.18149
201.097	201.277	62.949	1.28408	1.02681	-0.39684	0.426255
201.098	201.278	62.95	-0.707678	0.767998	-0.511323	0.678574
201.099	201.279	62.951	0.385016	0.779277	0.711933	0.627766
201.1	201.28	62.952	-0.500059	-0.945012	1.38501	-0.648473
201.101	201.281	62.953	0.0742851	-0.384935	1.26096	0.0525114
201.102	201.282	62.954	-0.0348656	0.329935	0.366175	0.725938
201.103	201.283	62.955	1.16089	1.23443	-0.663485	1.05748
	201.284	62.956	1.12716	0.944429	-0.298688	1.26933
201.104	201.284	62.957	1.09344	0.654432	0.0661082	1.48118
201.105	201.285	62.958	0.503869	0.91954	-0.241393	1.55782
201.106	201.286	62.959	-0.0109196	0.518568	-0.41171	0.438311
201.107	201.287	62.96	0.880194	0.894309	-0.123517	1.24263
201.109	201.289	62.961	0.368656	0.907752	0.0804366	1.26847
201.11	201.29	62.962	0.627934	0.61724	0.313986	0.718188
201.111	201.291	62.963	0.769547	0.372281	0.868715	0.917977
201.112	201.292	62.964	0.667002	0.156865	0.685839	0.669102
201.113	201.293	62.965	-0.229789	-0.322484	0.998393	0.245411
201.114	201.294	62.966	0.746633	0.356676	0.592036	0.888697
	201.294	62.967	-0.30911	-0.0447025	0.756416	0.471896
201.115	201.295	62.968	-1.36485	-0.446081	0.920796	0.0550948
201.116	201.296	62.969	0.83256	0.342623	1.16546	1.0506
201.117	201.297	62.97	1.79014	0.256277	0.863157	0.798276
201.118	201.298	62.971	-0.738849	-0.691649	1.22808	-0.00346402
201.119	201.299	62.972	-0.305188	-0.0968763	1.70857	0.197186
201.121	201.301	62.973	-1.29658	-0.386953	1.44243	-0.100775
201.122	201.302	62.974	1.2801	-0.158994	1.7011	0.55629
201.123	201.303	62.975	0.66824	-0.0661004	1.40565	0.269524
201.124	201.304	62.976	0.17394	-0.278004	1.94591	0.0662899
201.125	201.305	62.977	0.513055	-0.196666	2.17231	0.128293
201.126	201.306	62.978	1.31974	-0.26999	2.55156	-0.232532
	201.306	62.979	0.526215	-0.123921	2.2487	-0.183446
201.127	201.307	62.98	-0.267308	0.0221479	1.94584	-0.13436
201.128	201.308	62.981	0.725009	-0.35188	2.23042	-0.257506
201.129	201.309	62.982	-0.277887	-0.81767	2.40023	-0.273868
201.13	201.31	62.983	0.17652	-0.145072	1.54713	0.283302
201.132	201.312	62.984	0.640888	0.424774	0.775238	0.760385
201.133	201.313	62.985	0.488696	0.116188	1.01983	0.358223
201.134	201.314	62.986	0.773004	0.588249	0.726045	0.921421
201.135	201.315	62.987	0.252332	0.394986	0.614666	1.25125
201.136	201.316	62.988	-0.698956	-0.174295	0.654331	0.149822
201.137	201.317	62.989	0.10654	-0.0932906	1.23447	0.589014
	201.317	62.99	0.612581	0.152365	1.0694	0.754357
201.138	201.318	62.991	1.11862	0.39802	0.904338	0.919699
201.139	201.319	62.992	0.545104	0.153744	0.63051	0.558012
201.14	201.32	62.993	-0.260495	0.000111201	0.461709	0.188575
201.141	201.321	62.994	0.908681	0.444169	0.729618	0.804304
201.142	201.322	62.995	0.578752	0.342725	0.725612	0.716465
201.144	201.324	62.996	0.353019	0.718422	0.533965	0.583847
201.145	201.325	62.997	0.564766	0.421653	0.777223	1.0239
201.146	201.326	62.998	-0.427808	0.16556	0.728066	0.520982
201.147	201.327	62.999	0.9478	0.162178	1.13316	0.776747
201.148	201.328	63	0.321745	0.108553	1.09768	0.917977
201.149	201.329	63.001	0.240875	0.139735	0.707927	0.223882
	201.329	63.002	-0.0811837	-0.112271	0.888349	0.286316
201.15	201.33	63.003	-0.403243	-0.364278	1.06877	0.34875
201.151	201.331	63.004	0.358386	-0.0256563	1.19701	0.369418
201.152	201.332	63.005	-1.11177	-0.418644	0.619899	-0.0112145
201.153	201.333	63.006	-1.08653	-1.44	0.489283	-1.27195
201.154	201.334	63.007	0.446068	-0.493159	0.830422	0.26694
201.156	201.336	63.008	-0.290376	-0.734328	0.974717	-0.0534113
201.157	201.337	63.009	0.509391	0.153744	0.905854	0.833583
201.158	201.338	63.01	0.533079	-0.606754	1.0382	0.299664
201.159	201.339	63.011	-0.586296	-0.355016	0.764663	-0.0456608
201.16	201.34	63.012	-1.37843	-0.378896	0.674758	0.093847
201.161	201.341	63.013	1.30549	0.298811	0.676635	0.754357
	201.341	63.014	0.826831	0.0280635	0.837586	0.597625
201.162	201.342	63.015	0.348168	-0.242684	0.998537	0.440894
201.163	201.343	63.016	0.0458491	0.00513403	0.638956	0.762968
201.164	201.344	63.017	-0.996269	-1.0383	1.62512	-0.82501
201.165	201.345	63.018	0.757057	0.278139	0.837749	0.550262
201.167	201.347	63.019	0.510888	0.680185	0.334017	0.824972
201.168	201.348	63.02	0.708185	0.321864	0.768236	0.915393
201.169	201.349	63.021	-0.455212	-0.358892	0.77614	0.306553
201.17	201.35	63.022	-0.786586	0.188686	0.37065	0.668241
201.171	201.351	63.023	0.795247	-0.0636616	0.269232	0.513232
201.172	201.352	63.024	-0.528392	-0.0109071	0.339431	0.386641
	201.352	63.025	-0.346216	-0.207793	0.459959	0.112362
201.173	201.353	63.026	-0.16404	-0.404678	0.580487	-0.161917
201.174	201.354	63.027	-0.122083	0.00972139	0.371444	0.443478
201.175	201.355	63.028	-0.435962	0.602607	-0.0106588	1.10054
201.176	201.356	63.029	0.20862	0.627053	-0.63638	0.910226
201.177	201.357	63.03	1.22617	0.0490187	-0.0784751	0.527872
201.179	201.359	63.031	-0.0263503	0.127366	-0.445275	0.684603
201.18	201.36	63.032	-1.45248	-0.67899	-0.511359	0.0249543
201.181	201.361	63.033	-1.3552	-0.750674	-0.897179	-0.832761
201.182	201.362	63.034	0.638256	0.715084	-0.655365	0.306553
201.183	201.363	63.035	-0.269011	0.0908709	-0.116263	0.546817
201.184	201.364	63.036	0.555322	0.50723	0.520178	0.77933
	201.364	63.037	0.29238	0.513088	0.396925	0.756509
201.185	201.365	63.038	0.0294378	0.518946	0.273672	0.733689
201.186	201.366	63.039	-0.555692	0.0173282	-0.743284	-0.421988
201.187	201.367	63.04	0.197938	0.431902	-0.612091	0.307415
201.188	201.368	63.041	-2.05181	-0.599103	-0.37107	-0.719088
201.19	201.37	63.042	0.641353	0.894164	-1.18028	0.662212
201.191	201.371	63.043	0.223174	0.278865	-0.63371	0.542511
201.192	201.372	63.044	0.134099	-0.269061	0.112161	0.365112
201.193	201.373	63.045	-0.488344	-0.507081	-0.473787	-0.298842
201.194	201.374	63.046	0.17683	-0.272371	-0.607976	0.034427
201.195	201.375	63.047	0.125428	-1.05961	-0.240382	-0.521021
201.196	201.376	63.048	-1.92593	-2.66145	0.0351777	-1.94366
	201.376	63.049	-1.61169	-2.44057	0.255878	-1.5936
201.197	201.377	63.05	-1.29745	-2.2197	0.476579	-1.24353
201.198	201.378	63.051	-0.642652	-2.16294	0.525411	-0.924905
201.199	201.379	63.052	-1.58728	-3.34653	0.360905	-1.81621
201.2	201.38	63.053	-2.51545	-3.59002	0.242994	-2.77037
201.202	201.382	63.054	-2.08489	-3.78075	-0.476963	-3.18287
201.203	201.383	63.055	-1.34823	-4.19146	-0.439572	-3.85629
201.204	201.384	63.056	-1.5927	-3.94862	-0.169426	-3.82529
201.205	201.385	63.057	-2.62636	-4.3404	-0.389838	-4.1155
201.206	201.386	63.058	-1.60994	-4.86153	-0.306358	-4.85868
201.207	201.387	63.059	-2.34984	-5.46604	-1.10691	-5.35557
	201.387	63.06	-1.68051	-4.51777	-0.778167	-3.71162
201.208	201.388	63.061	-1.01118	-3.5695	-0.449425	-2.06766
201.209	201.389	63.062	-1.53655	-2.13324	-0.616638	-0.198947
201.21	201.39	63.063	-0.331921	-0.951458	-0.314082	0.604515
201.211	201.391	63.064	-0.105001	-0.669133	0.0462578	-0.0783849
201.212	201.392	63.065	-0.33512	-0.838734	0.657687	0.129155
201.214	201.394	63.066	-0.803565	-0.557585	0.108805	-0.114554
201.215	201.395	63.067	-1.41734	-1.54909	0.171243	-0.869791
201.216	201.396	63.068	0.200621	-0.267769	0.394904	0.600209
201.217	201.397	63.069	-0.87979	-0.00197923	0.0614885	0.380613
201.218	201.398	63.07	-0.0591213	-0.338873	0.551217	0.188575
201.219	201.399	63.071	-0.421357	-0.694958	0.837712	-0.37204
	201.399	63.072	-1.11347	-0.676384	0.279302	-0.560634
201.22	201.4	63.073	-1.80558	-0.65781	-0.279109	-0.749228
201.221	201.401	63.074	-0.130547	-0.477321	-0.263878	-0.157612
201.222	201.402	63.075	-1.99024	-1.02841	-0.0305092	-0.910265
201.223	201.403	63.076	-2.20849	-1.9464	-0.32823	-2.04355
201.225	201.405	63.077	-1.2397	-0.73742	-0.0924786	-0.773341
201.226	201.406	63.078	0.265131	-0.360474	0.0267322	-0.112831
201.227	201.407	63.079	-0.716967	0.242094	0.312434	-0.0404939
201.228	201.408	63.08	-0.0317175	0.209648	0.0434427	-0.117998
201.229	201.409	63.081	1.21585	0.357706	-0.00134712	0.726799
201.23	201.41	63.082	0.938666	0.291349	-0.260522	0.093847
201.231	201.411	63.083	0.16238	-0.414971	-0.534746	0.0120369
	201.411	63.084	0.0663374	-0.18233	-0.24899	0.0090228
201.232	201.412	63.085	-0.0297048	0.0503107	0.0367657	0.00600874
201.233	201.413	63.086	0.00760767	0.72359	-0.222878	0.351334
201.234	201.414	63.087	0.17523	-0.30367	-0.0555568	-0.110248
201.235	201.415	63.088	0.253881	0.0592386	-0.138748	-0.0318823
201.237	201.417	63.089	-0.721251	-0.632899	-0.606352	-0.893903
201.238	201.418	63.09	-0.932688	-0.907864	-0.16163	-0.836205
201.239	201.419	63.091	-0.623144	0.663403	0.324958	0.860279
201.24	201.42	63.092	-0.306168	0.16257	-0.0476888	0.105042
201.241	201.421	63.093	0.743949	0.808689	-0.357319	0.5494
201.242	201.422	63.094	0.165683	0.00358073	-0.211726	-0.106803
	201.423	63.095	0.301334	0.0953349	-0.100166	-0.0404939
201.243	201.423	63.096	0.436985	0.187089	0.0113933	0.0258154
201.244	201.424	63.097	-0.104433	-0.223231	-0.356201	-0.496909
201.245	201.425	63.098	-0.60152	0.0188816	-0.657566	-0.0887188
201.246	201.426	63.099	-0.129927	0.306607	-0.909125	0.361668
201.247	201.427	63.1	1.07919	0.983995	-0.821314	1.55782
201.249	201.429	63.101	0.476362	1.00011	-0.860113	0.944673
201.25	201.43	63.102	0.497212	0.535408	-0.620464	0.469313
201.251	201.431	63.103	0.57514	1.03874	-0.285244	0.653601
201.252	201.432	63.104	0.81522	0.577754	-0.431307	0.546817
201.253	201.433	63.105	-0.536081	-0.507792	-0.6772	-1.46055
201.254	201.434	63.106	1.79525	1.0106	-0.628332	0.882669
	201.435	63.107	1.33323	1.07282	-0.557791	1.00797
201.255	201.435	63.108	0.871214	1.13503	-0.48725	1.13327
201.256	201.436	63.109	-0.301988	0.521907	-0.695823	0.210104
201.257	201.437	63.11	1.06036	0.569987	-0.634071	0.736272
201.258	201.438	63.111	-1.04272	-1.50147	-0.741082	-1.3107
201.26	201.44	63.112	1.23593	-0.438909	-0.32195	-0.306592
201.261	201.441	63.113	-0.111968	0.0045824	-0.374968	0.124849
201.262	201.442	63.114	-1.98678	-1.32415	-0.599711	-1.14364
201.263	201.443	63.115	-1.51962	-1.67954	-0.826187	-1.41146
201.264	201.444	63.116	-1.08891	-1.47831	-0.786847	-1.35635
201.265	201.445	63.117	-1.58006	-1.43246	-0.465595	-1.00585
201.266	201.446	63.118	0.736724	-0.473968	-0.179929	-0.589053
	201.446	63.119	0.82469	0.0325492	-0.295206	0.0456221
201.267	201.447	63.12	0.912655	0.539066	-0.410482	0.680297
201.268	201.448	63.121	-0.944661	-0.627948	-0.433942	-1.32621
201.269	201.449	63.122	0.813155	0.71668	-0.349957	0.693214
201.27	201.45	63.123	-0.673049	-0.599742	-0.395649	-0.695836
201.272	201.452	63.124	0.0202	-0.0195447	-0.566254	-0.461601
201.273	201.453	63.125	0.0589059	0.306229	-0.495803	0.421949
201.274	201.454	63.126	0.345588	0.0504123	-0.66067	-0.280757
201.275	201.455	63.127	-0.805991	-0.43168	-0.881407	-1.19531
201.276	201.456	63.128	1.34162	1.14113	-0.608157	0.899892
201.277	201.457	63.129	1.41041	0.892524	-0.480356	0.755218
	201.458	63.13	0.864324	0.4708	-0.483604	0.31861
201.278	201.458	63.131	0.318236	0.0490767	-0.486853	-0.117998
201.279	201.459	63.132	0.696986	0.661313	-0.554236	0.239383
201.28	201.46	63.133	1.28537	0.339923	-0.390452	0.0370105
201.281	201.461	63.134	0.71639	-0.100752	0.0640149	-0.734589
201.282	201.462	63.135	-0.617415	-0.363799	-1.06464	-0.547717
201.284	201.464	63.136	-0.775439	-0.34587	-1.2726	-0.394431
201.285	201.465	63.137	-1.84161	-0.985587	-1.33349	-1.17981
201.286	201.466	63.138	-0.561214	-0.0449203	-1.15884	-0.115415
201.287	201.467	63.139	-0.781219	-0.583527	-0.932549	-0.537383
201.288	201.468	63.14	0.854183	0.964803	-1.28368	0.684603
201.289	201.469	63.141	-0.215906	0.0280417	-1.35713	-0.47538
	201.47	63.142	-0.371607	-0.294415	-1.35872	-0.821566
201.29	201.47	63.143	-0.527308	-0.616872	-1.36031	-1.16775
201.291	201.471	63.144	0.516152	0.205438	-1.07695	-0.0585782
201.292	201.472	63.145	0.34373	0.319469	-1.18158	-0.352234
201.293	201.473	63.146	-0.201817	0.164254	-0.874477	-0.305731
201.295	201.475	63.147	0.5867	1.20037	-1.21175	0.798276
201.296	201.476	63.148	-0.363195	-0.19819	-1.13795	-0.143833
201.297	201.477	63.149	-0.771207	-0.378954	-1.50615	-0.643306
201.298	201.478	63.15	0.394667	0.545468	-1.59656	0.260051
201.299	201.479	63.151	0.414897	0.612652	-1.62883	0.377169
201.3	201.48	63.152	0.248771	0.666045	-1.61237	0.0998751
201.301	201.481	63.153	-0.67919	-0.323529	-1.46032	-0.303148
	201.482	63.154	-1.89972	-1.05384	-1.35332	-0.738894
201.302	201.482	63.155	-3.12024	-1.78415	-1.24633	-1.17464
201.303	201.483	63.156	-0.580619	-0.578402	-0.849863	-0.228227
201.304	201.484	63.157	-0.809036	-0.659421	-0.879999	-0.309176
201.305	201.485	63.158	-0.306581	0.31298	-0.8726	0.221299
201.307	201.487	63.159	0.725628	0.186987	-0.252726	-0.243728
201.308	201.488	63.16	0.811349	1.7381	-0.533447	1.51993
201.309	201.489	63.161	1.01954	2.25446	-0.851667	2.68852
201.31	201.49	63.162	-0.074294	1.23659	-0.452638	1.10657
201.311	201.491	63.163	0.401634	0.931211	-1.07186	0.403865
201.312	201.492	63.164	1.41619	1.3863	-0.88516	0.908504
	201.493	63.165	1.13658	1.18846	-0.975137	0.375446
201.313	201.493	63.166	0.85697	0.990615	-1.06511	-0.157612
201.314	201.494	63.167	0.135905	0.342609	0.333259	-0.250617
201.315	201.495	63.168	1.65689	1.36487	-0.675071	0.532177
201.316	201.496	63.169	0.0156585	1.0232	-1.21562	0.498592
201.317	201.497	63.17	1.98063	1.27277	-1.34425	0.722494
201.319	201.499	63.171	0.249081	0.40522	-1.34338	-0.22306
201.32	201.5	63.172	0.418974	0.26172	-1.2625	-0.0835519
201.321	201.501	63.173	-0.322167	0.963947	-1.0453	0.567485
201.322	201.502	63.174	1.09757	0.533709	-0.4081	0.464146
201.323	201.503	63.175	0.489729	0.469893	-0.212953	0.443478
201.324	201.504	63.176	1.20703	-0.209368	2.38767	0.471896
	201.505	63.177	0.43665	-0.252984	2.37744	0.324207
201.325	201.505	63.178	-0.333727	-0.2966	2.36721	0.176518
201.326	201.506	63.179	0.744104	0.610751	1.32102	1.29775
201.327	201.507	63.18	-0.326295	0.526523	-0.532075	0.859418
201.328	201.508	63.181	0.27442	1.37176	-0.458773	1.89281
201.33	201.51	63.182	1.32036	1.34031	-0.480536	1.24694
201.331	201.511	63.183	1.4083	0.876091	-0.274778	0.684603
201.332	201.512	63.184	0.451952	0.554396	-0.250632	0.335833
201.333	201.513	63.185	0.642643	1.03614	-0.189457	1.02132
201.334	201.514	63.186	0.503714	0.458671	0.746581	0.460701
201.335	201.515	63.187	-0.471055	0.498433	-0.237423	0.692353
201.336	201.516	63.188	2.27918	1.19034	-0.641289	1.37181
	201.517	63.189	1.73513	1.26871	-0.743085	1.33951
201.337	201.517	63.19	1.19108	1.34709	-0.844882	1.30722
201.338	201.518	63.191	1.13034	1.37472	-0.699144	0.666518
201.339	201.519	63.192	0.956264	2.17427	-1.09096	1.60432
201.34	201.52	63.193	0.813104	2.00478	-1.00293	1.55437
201.342	201.522	63.194	2.34643	1.58632	-1.02769	0.877502
201.343	201.523	63.195	1.32062	1.65867	-0.93789	1.0816
201.344	201.524	63.196	1.21441	1.7449	-0.934967	1.10571
201.345	201.525	63.197	1.29595	1.55148	-1.12806	1.22627
201.346	201.526	63.198	1.78813	1.65921	-1.19143	1.321
201.347	201.527	63.199	1.47384	1.64771	-1.19833	1.19527
	201.528	63.2	1.42138	1.7335	-1.18191	1.25254
201.348	201.528	63.201	1.36892	1.81928	-1.16548	1.3098
201.349	201.529	63.202	1.80413	1.62651	-1.18339	1.25813
201.35	201.53	63.203	1.90229	1.76476	-1.2473	1.3787
201.351	201.531	63.204	0.975875	1.70586	-0.926052	1.09193
201.352	201.532	63.205	0.844326	2.0178	-1.14221	1.66805
201.354	201.534	63.206	1.40479	1.99887	-1.21944	1.66374
201.355	201.535	63.207	1.49722	1.83546	-0.978277	1.21766
201.356	201.536	63.208	0.883703	2.12314	-1.33475	1.70422
201.357	201.537	63.209	2.32785	1.70055	-1.31772	0.834444
201.358	201.538	63.21	1.86621	1.52948	-1.23792	1.63188
201.359	201.539	63.211	1.95916	1.16443	-1.15061	0.837889
	201.54	63.212	1.48181	1.45658	-1.08944	1.13456
201.36	201.54	63.213	1.00447	1.74873	-1.02826	1.43123
201.361	201.541	63.214	0.884839	1.40623	-0.486022	1.16857
201.362	201.542	63.215	0.41113	0.608834	-0.388178	0.0172038
201.363	201.543	63.216	-0.128637	-0.0697151	-1.25503	-0.303148
201.365	201.545	63.217	-0.98476	-1.52469	-1.43292	-2.48016
201.366	201.546	63.218	-0.738746	-1.10734	-0.748012	-1.30037
201.367	201.547	63.219	-0.53732	0.920338	-0.406332	0.926588
201.368	201.548	63.22	-0.760627	-0.0963246	2.20443	-0.54255
201.369	201.549	63.221	0.878388	1.6358	0.262591	0.961035
201.37	201.55	63.222	1.48029	1.60156	0.031749	0.663935
201.371	201.551	63.223	1.02722	1.04687	0.259451	0.411615
	201.552	63.224	1.10567	0.968861	0.409575	0.37803
201.372	201.552	63.225	1.18411	0.890854	0.559698	0.344444
201.373	201.553	63.226	0.364579	0.627314	0.0357551	-0.459017
201.374	201.554	63.227	-0.012829	1.14139	0.47066	0.748328
201.375	201.555	63.228	0.843346	1.19195	0.835836	0.917977
201.377	201.557	63.229	1.67841	1.16146	0.469866	0.73455
201.378	201.558	63.23	0.883342	1.18426	0.719909	0.639822
201.379	201.559	63.231	1.18685	0.662227	1.28456	0.227327
201.38	201.56	63.232	0.105147	0.887849	1.18831	0.917116
201.381	201.561	63.233	0.293619	0.17009	2.95929	0.0447609
201.382	201.562	63.234	0.536176	0.771801	1.68991	0.451228
	201.562	63.235	-0.0731329	-0.0825916	3.04198	-0.121012
201.383	201.563	63.236	-0.682441	-0.936984	4.39404	-0.693253
201.384	201.564	63.237	-0.342758	-0.76943	5.28399	-0.779369
201.385	201.565	63.238	-0.29337	0.00761642	3.0911	-0.222199
201.386	201.566	63.239	0.701889	0.297722	1.82847	0.46759
201.387	201.567	63.24	0.0249995	-0.290169	3.07215	-0.254923
201.389	201.569	63.241	-1.67037	0.12487	1.73686	-0.0869965
201.39	201.57	63.242	0.990428	0.306345	0.801043	0.268662
201.391	201.571	63.243	-0.7132	0.422713	0.764735	0.176518
201.392	201.572	63.244	0.878955	0.613712	1.85106	0.790525
201.393	201.573	63.245	-0.807023	0.227315	2.34396	0.202353
201.394	201.574	63.246	0.0882192	0.477427	1.78909	0.210965
	201.575	63.247	0.487174	0.600204	1.65806	0.245842
201.395	201.575	63.248	0.886129	0.722981	1.52703	0.280719
201.396	201.576	63.249	0.408446	0.803608	1.78537	0.86114
201.397	201.577	63.25	0.741988	0.34586	1.69236	0.673407
201.398	201.578	63.251	0.696728	0.321574	2.17588	0.479647
201.4	201.58	63.252	0.87622	0.548429	2.73776	0.297081
201.401	201.581	63.253	0.276536	0.473493	1.86376	0.179102
201.402	201.582	63.254	0.996673	0.738006	1.68356	0.347028
201.403	201.583	63.255	-0.0229958	0.222147	1.53894	-0.181724
201.404	201.584	63.256	-0.546609	0.388555	2.371	-0.182585
201.405	201.585	63.257	1.06985	0.420637	2.80323	0.0318435
	201.585	63.258	0.376552	0.233478	3.14366	-0.310037
201.406	201.586	63.259	-0.316748	0.0463185	3.4841	-0.651917
201.407	201.587	63.26	0.610955	0.204408	2.86708	-0.142111
201.408	201.588	63.261	0.539995	0.580105	2.92273	0.443478
201.409	201.589	63.262	1.259	0.395291	3.01527	0.324638
201.41	201.59	63.263	0.358283	0.837171	2.56557	0.617432
201.412	201.592	63.264	0.736259	1.11003	2.49349	0.515815
201.413	201.593	63.265	1.00147	0.658671	3.42549	0.492564
201.414	201.594	63.266	0.907236	0.276136	3.92442	-0.187752
201.415	201.595	63.267	-0.444065	-0.885014	5.98179	-1.57422
201.416	201.596	63.268
201.417	201.597	63.269
	201.597	63.27
201.418	201.598	63.271
201.421	201.601	63.272
201.44	201.62	63.273	0.137783	0.472867	-0.241842	0.820417
201.441	201.621	63.274	-0.395563	0.677691	-0.261494	0.829717
201.442	201.622	63.275	0.762195	0.880162	-0.236707	0.696917
201.443	201.623	63.276	1.51767	0.977053	-0.111503	0.539194
201.444	201.624	63.277	-0.0988846	0.798705	-0.152106	0.748995
201.445	201.625	63.278	0.567754	0.705921	-0.0434145	0.882167
201.446	201.626	63.279	1.46593	0.617818	-0.0385436	1.13698
201.447	201.627	63.28	0.331261	0.283952	-0.0464514	0.770199
201.448	201.628	63.281	0.544407	0.493288	-0.0535669	1.00232
201.449	201.629	63.282	0.535121	0.464467	-0.00319341	0.903743
201.45	201.63	63.283	0.102084	0.613526	-0.0149157	0.958797
201.451	201.631	63.284	-0.253378	0.590445	-0.00319341	0.674969
201.452	201.632	63.285	-0.759697	0.25096	0.00281444	0.617683
201.453	201.633	63.286	0.833463	0.439786	0.135735	0.840505
201.454	201.634	63.287	-0.821416	-0.0652255	0.0431382	0.358779
201.456	201.636	63.288	-0.357454	0.207717	0.0516621	0.59276
201.457	201.637	63.289	-0.435642	0.0731214	0.0581615	0.546633
201.458	201.638	63.29	-0.484702	-0.0181667	0.0231854	0.455496
201.459	201.639	63.291	-0.204976	0.0043643	0.0972748	0.654882
201.46	201.64	63.292	-0.410412	-0.0343757	0.0560928	0.469632
201.461	201.641	63.293	-0.654876	-0.10686	0.067441	0.456984
201.462	201.642	63.294	0.220483	0.103252	0.00772928	0.503111
201.463	201.643	63.295	-0.0532418	-0.0796722	0.0258335	0.593132
	201.643	63.296	0.108413	0.0301209	0.0843568	0.593504
201.464	201.644	63.297	0.270068	0.139914	0.14288	0.593876
201.465	201.645	63.298	-0.468319	0.290856	0.0384874	0.382214
201.466	201.646	63.299	-0.663155	0.0713671	0.277877	0.316
201.467	201.647	63.3	-0.0788666	-0.0135344	0.306838	0.0998747
201.468	201.648	63.301	1.20312	0.435816	0.162848	0.728536
201.469	201.649	63.302	1.30807	1.00304	-0.149069	1.11392
201.47	201.65	63.303	1.24937	1.36446	-0.243243	1.25825
201.471	201.651	63.304	1.62455	1.21659	-0.354377	1.30772
201.472	201.652	63.305	1.43155	1.38399	-0.495015	1.28466
201.473	201.653	63.306	-0.185308	-0.202206	-0.749663	-0.0507808
201.474	201.654	63.307	0.629122	-0.210404	-0.746318	0.0753234
201.475	201.655	63.308	-0.541777	-0.180201	-0.752524	-0.00874606
201.476	201.656	63.309	-0.479402	-0.371791	-0.7508	-0.151218
201.477	201.657	63.31	-0.304759	-0.456684	-0.752164	-0.254631
201.478	201.658	63.311	0.586677	-0.459215	-0.733173	-0.293318
201.479	201.659	63.312	0.468189	-0.418033	-0.720871	-0.488984
201.48	201.66	63.313	-0.456843	-0.289759	-0.732278	-0.316009
201.481	201.661	63.314	-0.339976	0.0738975	-0.772418	-0.0983954
201.482	201.662	63.315	-0.889792	-0.0583296	-0.773709	-0.423886
201.483	201.663	63.316	-0.862897	0.186148	-0.766674	-0.13299
201.484	201.664	63.317	0.82133	0.422388	-0.736393	0.211843
201.486	201.666	63.318	-0.202654	0.4193	-0.716638	0.216679
201.487	201.667	63.319	-0.4886	0.233595	-0.719506	0.0455643
201.488	201.668	63.32	-0.0957746	0.335094	-0.720196	-0.0920716
201.489	201.669	63.321	0.726014	0.573185	-0.726042	0.0649077
201.49	201.67	63.322	1.27561	0.737054	-0.72481	0.356175
201.491	201.671	63.323	-0.7261	0.0401859	-0.762926	-0.46406
201.492	201.672	63.324	-1.44118	0.0731942	-0.778419	-0.279182
201.493	201.673	63.325	1.0527	0.333727	-0.757916	0.12145
	201.673	63.326	0.0645226	-0.129104	-0.763747	-0.392081
201.494	201.674	63.327	-0.923652	-0.591935	-0.769579	-0.905611
201.495	201.675	63.328	-0.641955	0.0601623	-0.73654	-0.193997
201.496	201.676	63.329	-0.785891	0.236699	-0.734647	-0.00651413
201.497	201.677	63.33	-0.148251	0.237839	-0.724795	-0.0385052
201.498	201.678	63.331	0.332882	0.161273	-0.707645	0.0823912
201.499	201.679	63.332	-0.21159	0.266029	-0.722844	0.225607
201.5	201.68	63.333	0.709457	0.456059	-0.724341	0.305957
201.501	201.681	63.334	0.126657	0.301285	-0.739731	0.0604439
201.502	201.682	63.335	0.356886	0.511364	-0.7209	0.237883
201.503	201.683	63.336	0.491361	0.446075	-0.72795	0.288473
201.504	201.684	63.337	0.128804	0.234525	-0.759779	-0.300385
201.505	201.685	63.338	0.182594	0.445873	-0.74733	0.191384
201.506	201.686	63.339	1.69888	1.34278	-0.716587	1.01236
201.507	201.687	63.34	0.845509	1.1029	-0.699062	0.772059
201.508	201.688	63.341	1.22971	1.3781	-0.722778	0.74044
201.509	201.689	63.342	0.950154	1.11935	-0.718589	0.677945
201.51	201.69	63.343	2.64884	2.35039	-0.718421	1.65739
201.511	201.691	63.344	3.85184	2.11304	-0.721142	1.50339
201.518	201.698	63.345	-0.832104	-1.88036	2.18026	-1.91147
201.528	201.708	63.346	-1.19291	-2.00321	2.10317	-2.00521
201.529	201.709	63.347	-1.65372	-1.98481	2.09184	-2.07924
201.544	201.724	63.348	-1.41328	-1.96666	2.08526	-2.03571
201.548	201.728	63.349	-0.971791	-2.0438	2.14658	-1.95202
201.549	201.729	63.35	-1.27377	-1.96135	2.1683	-1.98066
201.561	201.741	63.351	-1.35183	-1.88956	2.21141	-1.88803
201.572	201.752	63.352	-1.83309	-2.01402	2.20425	-1.98103
201.578	201.758	63.353	-1.66747	-1.92239	2.15311	-2.0558
201.579	201.759	63.354	-1.21039	-2.00711	2.18766	-2.05803
201.581	201.761	63.355	-1.9097	-2.00112	2.05211	-2.04576
201.583	201.763	63.356	-0.885587	-2.05468	2.08182	-2.07328
	201.763	63.357	-0.737993	-1.80763	2.01739	-1.89864
201.584	201.764	63.358	-0.590398	-1.56057	1.95297	-1.72399
201.585	201.765	63.359
201.586	201.766	63.36
201.587	201.767	63.361	-0.0320131	-0.13324	3.56393	-0.280032
201.588	201.768	63.362	0.188415	0.600864	-0.0387638	0.691781
201.589	201.769	63.363	0.198892	0.443387	-0.374486	0.811861
201.59	201.77	63.364	0.733102	0.374744	-0.466946	0.874694
201.591	201.771	63.365	0.127581	-0.179092	-0.411479	0.305709
201.592	201.772	63.366	0.353267	0.0121079	-0.408737	0.657572
201.593	201.773	63.367	-0.119771	0.285599	-0.548618	0.691781
201.594	201.774	63.368	0.285111	0.824571	-0.162463	0.867015
201.595	201.775	63.369	-0.044668	0.122973	0.32213	0.627552
201.596	201.776	63.37	-0.54234	0.215832	0.365865	0.672233
201.597	201.777	63.371	0.185749	0.234587	0.463494	0.785332
201.598	201.778	63.372	-0.250076	-0.303168	0.208275	0.180741
201.599	201.779	63.373	-0.204751	0.0524471	-0.453236	0.607306
201.6	201.78	63.374	-0.812149	-0.261539	-0.139854	0.0850959
201.601	201.781	63.375	0.362805	0.103251	0.0870028	0.649893
201.602	201.782	63.376	-0.0560086	-0.113622	0.0741025	0.420902
201.603	201.783	63.377	-0.715941	-0.22896	0.184047	0.147929
201.604	201.784	63.378	-1.20888	-0.770719	0.386631	-0.195557
201.605	201.785	63.379	-0.588266	-0.188693	0.180182	0.303614
201.607	201.787	63.38	-0.440237	-0.0304053	-0.0495965	0.359466
201.608	201.788	63.381	-0.98958	-1.15738	-1.01276	-1.80687
201.609	201.789	63.382	-1.33055	-0.670454	-0.834492	-0.691238
201.61	201.79	63.383	0.547897	0.786426	-0.646561	1.33547
201.611	201.791	63.384	-0.594011	-0.607823	-0.895667	-0.458058
201.612	201.792	63.385	0.332726	0.343809	-0.792195	0.801389
201.613	201.793	63.386	-0.567913	0.444615	-1.18347	0.640817
	201.793	63.387	-0.520579	0.016456	-1.23804	0.368541
201.614	201.794	63.388	-0.473245	-0.411703	-1.29261	0.0962661
201.615	201.795	63.389	-0.314364	-0.0138868	-1.15197	0.578682
201.616	201.796	63.39	-0.411961	-0.562189	-1.07802	0.107436
201.617	201.797	63.391	-0.855446	-0.899102	-1.23445	-0.600479
201.618	201.798	63.392	-0.430812	-0.701535	-1.18401	-0.695427
201.619	201.799	63.393	-0.228258	-0.351506	-1.07326	0.185628
201.62	201.8	63.394	-1.82443	-1.51011	-1.31962	-2.01073
201.621	201.801	63.395	-1.00028	-1.0985	-1.29239	-1.56391
201.622	201.802	63.396	-0.677864	-0.481522	-1.12189	-0.273051
201.623	201.803	63.397	-0.300169	-0.139596	-0.984711	0.181439
201.624	201.804	63.398	-0.00745429	-0.103053	-0.829323	0.360164
201.625	201.805	63.399	0.731224	0.451366	-1.15017	0.346201
201.626	201.806	63.4	-1.28447	-0.534468	-1.35023	-0.73173
201.627	201.807	63.401	-0.903512	-1.47678	-1.32075	-1.48852
201.628	201.808	63.402	-0.782182	-1.50757	-1.38188	-1.65747
201.629	201.809	63.403	-0.474785	-1.81625	-1.48162	-2.14407
201.63	201.81	63.404	-0.886088	-1.52086	-1.44633	-1.63443
201.631	201.811	63.405	-1.24317	-1.99058	-1.57305	-2.12452
201.632	201.812	63.406	-1.5491	-1.94184	-1.57327	-1.89693
201.633	201.813	63.407	-1.11335	-0.969305	-1.4084	-1.09407
201.634	201.814	63.408	-0.574597	-1.83183	-1.59664	-2.15664
201.635	201.815	63.409	-1.44718	-2.06413	-1.58518	-2.37027
201.637	201.817	63.41	-1.5159	-1.22744	-1.51061	-1.23509
201.638	201.818	63.411	-1.15402	-1.69248	-1.49403	-1.62675
201.639	201.819	63.412	-2.09427	-1.33511	-1.58846	-1.39915
201.64	201.82	63.413	-0.675198	-0.554013	-1.50189	-0.514608
201.641	201.821	63.414	-0.989355	0.0427627	-1.31153	-0.0419659
201.642	201.822	63.415	0.111021	-0.204567	-1.15956	-0.351941
201.643	201.823	63.416	-0.792321	-0.484829	-1.10248	-0.244427
	201.823	63.417	-0.400958	-0.441843	-1.09117	-0.142498
201.644	201.824	63.418	-0.00959474	-0.398856	-1.07987	-0.0405696
201.645	201.825	63.419	-1.31992	-0.407781	-1.20208	-0.286316
201.646	201.826	63.42	-1.11891	-0.575057	-1.25467	-0.719862
201.647	201.827	63.421	-0.120935	-0.733282	-1.25993	-0.826677
201.648	201.828	63.422	-0.401146	-0.86724	-1.04108	-0.801544
201.649	201.829	63.423	-0.92011	-0.52495	-0.796061	-0.552308
201.65	201.83	63.424	-0.364195	-0.769169	-1.18514	-0.634688
201.651	201.831	63.425	-1.14748	-1.51051	-1.27715	-2.14547
201.652	201.832	63.426	-0.90768	-0.894285	-0.915939	-0.418962
201.653	201.833	63.427	-1.3322	-1.10825	-0.937919	-0.971891
201.654	201.834	63.428	-0.151127	-0.265679	-0.553337	0.00131887
201.655	201.835	63.429	-0.880192	-0.695637	-0.706882	-0.629801
201.656	201.836	63.43	-1.29292	-1.12062	-0.799522	-0.767335
201.657	201.837	63.431	-0.758112	-0.981881	-0.709265	-0.992137
201.658	201.838	63.432	-0.760102	-0.304416	-0.684363	0.00899843
201.659	201.839	63.433	-0.997992	-0.35446	-0.521918	-0.091534
201.66	201.84	63.434	0.0629926	0.0645343	-0.411794	0.129777
201.661	201.841	63.435	0.531787	0.537848	-0.392915	0.496301
201.662	201.842	63.436	0.000882172	0.687732	-0.429638	0.649893
201.663	201.843	63.437	0.258524	0.581828	-0.680767	0.613589
201.664	201.844	63.438	0.796714	0.724992	-0.548483	0.29035
201.665	201.845	63.439	0.459688	0.624633	-0.559226	0.396467
201.666	201.846	63.44	-0.393373	0.181932	-0.00662548	0.026452
201.668	201.848	63.441	0.837195	0.60075	-0.177116	0.504679
201.669	201.849	63.442	0.517443	0.465097	-0.781497	0.210761
201.67	201.85	63.443	0.197728	0.728331	-0.489061	0.336427
201.671	201.851	63.444	1.01395	0.673013	-0.803432	0.438356
201.672	201.852	63.445	0.176624	0.785677	-0.545471	0.653383
201.673	201.853	63.446	1.39382	2.24384	-1.45038	2.1893
	201.853	63.447	1.4705	2.0969	-1.4729	2.06154
201.674	201.854	63.448	1.54718	1.94996	-1.49542	1.93378
201.675	201.855	63.449	1.52338	1.94837	-1.69647	0.640119
201.676	201.856	63.45	1.04471	1.65627	-1.69234	0.759501
201.677	201.857	63.451	1.23348	1.57857	-1.6566	1.76552
201.678	201.858	63.452	1.70092	1.64785	-1.5165	1.59797
201.679	201.859	63.453	1.66367	1.64017	-1.58145	1.96519
201.68	201.86	63.454	1.45883	1.57053	-1.62447	1.49534
201.681	201.861	63.455	1.54756	1.77747	-1.65036	1.59867
201.682	201.862	63.456	2.03588	1.86137	-1.64806	1.6985
201.683	201.863	63.457	1.74523	1.96051	-1.66595	1.52536
201.684	201.864	63.458	1.36082	1.11343	-1.31792	1.08553
201.685	201.865	63.459	0.108468	0.382598	-0.858899	0.608004
201.686	201.866	63.46	-0.0457194	0.0125864	-0.578509	0.57938
201.687	201.867	63.461	-0.871781	-0.301389	-0.123088	0.0250557
201.688	201.868	63.462	-0.142077	-0.31332	-0.0688346	0.110229
201.689	201.869	63.463	-0.22792	-0.435971	-0.256945	-0.26956
201.69	201.87	63.464	-0.653117	-0.50322	-0.161699	-0.022418
201.691	201.871	63.465	-0.167462	-0.19145	0.470865	0.303614
201.692	201.872	63.466	0.238021	-0.134727	0.630883	0.110229
201.693	201.873	63.467	-0.316054	-0.407251	1.03007	-0.310751
201.694	201.874	63.468	-0.0632936	-0.367994	0.615376	-0.271655
201.695	201.875	63.469	-0.282407	-0.0255475	0.653987	0.355277
201.696	201.876	63.47	-0.282783	0.135216	0.280732	0.381108
201.698	201.878	63.471	0.729384	0.488106	0.365326	0.74484
201.699	201.879	63.472	0.417518	0.473148	0.337502	0.717612
201.7	201.88	63.473	-0.0354303	0.189525	0.152448	0.689687
201.701	201.881	63.474	-0.307492	0.59066	-0.21802	0.679215
201.702	201.882	63.475	0.640875	0.611776	-0.24818	0.351088
201.703	201.883	63.476	0.761115	0.251376	-0.216356	0.387391
	201.883	63.477	-0.0322384	0.186478	-0.236965	0.26382
201.704	201.884	63.478	-0.825592	0.121579	-0.257574	0.140249
201.705	201.885	63.479	0.261641	0.437469	-0.789408	0.7972
201.706	201.886	63.48	-0.78789	0.0532064	-0.492162	0.208667
201.707	201.887	63.481	0.285937	0.611204	-0.174734	0.805578
201.708	201.888	63.482	0.476774	0.250336	-0.0905448	0.140249
201.709	201.889	63.483	1.11587	0.873523	0.43594	1.07017
201.71	201.89	63.484	0.269865	0.467198	0.320287	0.316879
201.711	201.891	63.485	0.189129	0.223155	0.60733	0.401354
201.712	201.892	63.486	0.175723	0.221865	0.438412	0.594739
201.713	201.893	63.487	-0.102122	-0.259958	0.746581	-0.0650046
201.714	201.894	63.488	-0.956647	-0.391773	0.436569	-0.452473
201.715	201.895	63.489	0.757848	0.172352	0.445919	0.626854
201.716	201.896	63.49	-0.432802	-0.127945	0.178114	0.00550772
201.717	201.897	63.491	-1.64662	-0.192178	-0.347787	-0.229766
201.718	201.898	63.492	-0.635393	-0.968722	-0.905466	-1.18343
201.719	201.899	63.493	-0.943617	-0.736424	-0.697173	-0.823885
201.72	201.9	63.494	0.310758	-0.383659	-1.02323	-0.3673
201.721	201.901	63.495	-0.55109	-0.829668	-0.994644	-0.974683
201.722	201.902	63.496	-0.197428	-1.24622	-0.902949	-1.44174
201.723	201.903	63.497	-1.22871	-0.729309	-0.710523	-0.911851
201.724	201.904	63.498	-0.832952	-0.716431	-0.956932	-0.836451
201.725	201.905	63.499	-1.3642	-1.04282	-0.964304	-1.58975
201.726	201.906	63.5	-2.64884	-2.21941	-1.25319	-2.85687
201.728	201.908	63.501	-0.882032	-1.82429	-0.851438	-2.21179
201.729	201.909	63.502	0.223038	-0.62482	-0.336325	-0.784789
201.73	201.91	63.503	-0.844969	-0.968078	-0.751472	-1.61139
201.731	201.911	63.504	-1.15999	-1.28592	-1.09659	-1.63024
201.732	201.912	63.505	-1.67644	-1.78115	-1.22218	-2.24181
201.733	201.913	63.506	-0.930774	-0.119426	-1.13354	-0.564176
201.734	201.914	63.507	-0.748611	0.0858169	-0.992936	-0.0426641
	201.915	63.508	-0.73115	-0.00829053	-1.07324	-0.283523
201.735	201.915	63.509	-0.713688	-0.102398	-1.15354	-0.524382
201.736	201.916	63.51	-0.919997	-0.899778	-1.34403	-1.25394
201.737	201.917	63.511	-2.44377	-2.16121	-1.41487	-3.3742
201.738	201.918	63.512	0.0386591	0.0504811	-0.825232	0.231008
201.739	201.919	63.513	-1.59345	-1.62715	-1.35832	-2.18526
201.74	201.92	63.514	-0.49495	-0.582713	-0.993521	-0.610951
201.741	201.921	63.515	-1.38601	-0.558871	-1.06013	-0.707993
201.742	201.922	63.516	-1.39657	-0.73504	-1.06	-0.939776
201.743	201.923	63.517	-0.41887	-0.396537	-0.861776	-0.535552
201.744	201.924	63.518	0.27531	-0.321798	-0.820378	-0.293995
201.745	201.925	63.519	0.109219	-0.140501	-0.60386	-0.347054
201.746	201.926	63.52	-1.12792	-0.331774	-0.703152	-0.543232
201.747	201.927	63.521	0.382933	0.687472	-0.557248	0.434865
201.748	201.928	63.522	0.0478968	0.764488	-1.06787	0.0466981
201.749	201.929	63.523	-1.30197	-1.01705	-1.33742	-2.31372
201.75	201.93	63.524	1.32341	1.09915	-0.898139	0.967547
201.751	201.931	63.525	0.0314868	1.16341	-0.976081	0.467678
201.752	201.932	63.526	0.922024	0.875364	-0.771609	0.237989
201.753	201.933	63.527	0.278502	0.602476	-0.500298	-0.104101
201.754	201.934	63.528	-0.174371	0.29597	-0.971631	-0.195557
201.755	201.935	63.529	0.246921	0.491892	-0.890993	0.280576
201.756	201.936	63.53	0.773282	0.955491	-0.351562	0.641515
201.758	201.938	63.531	0.751127	0.799096	-0.505647	0.291048
201.759	201.939	63.532	1.92871	1.01009	-0.802578	0.76718
201.76	201.94	63.533	-0.948311	-0.783399	-1.1761	-1.80408
201.761	201.941	63.534	0.816016	0.562512	-0.972799	-0.0287012
201.762	201.942	63.535	1.76003	1.28996	-0.341224	0.74484
201.763	201.943	63.536	0.850563	0.682562	-0.0376851	0.307803
201.764	201.944	63.537	0.124052	0.114142	0.394048	-0.153669
	201.945	63.538	0.960214	0.872332	-0.291646	0.553549
201.765	201.945	63.539	1.79638	1.63052	-0.977339	1.26077
201.766	201.946	63.54	0.968063	1.55241	-0.850898	1.0227
201.767	201.947	63.541	1.18913	1.08149	-0.535583	0.563323
201.768	201.948	63.542	0.984923	1.29209	-0.830986	1.00664
201.769	201.949	63.543	1.22341	1.39674	-0.697578	1.12882
201.77	201.95	63.544	0.465922	1.14512	-0.732009	0.92496
201.771	201.951	63.545	-0.0760236	0.364894	1.61845	-0.0231161
201.772	201.952	63.546	-0.208844	0.920998	-1.08144	0.577286
201.773	201.953	63.547	1.31219	1.6205	-0.995184	1.21539
201.774	201.954	63.548	0.721048	1.4014	-1.03442	0.957773
201.775	201.955	63.549	0.834304	1.55073	-0.972305	0.816748
201.776	201.956	63.55	1.24392	0.783129	-1.07654	0.633835
201.777	201.957	63.551	1.18372	1.26748	-1.0039	0.987095
201.778	201.958	63.552	-0.102009	0.486837	0.452122	-0.222086
201.779	201.959	63.553	0.471217	-0.653936	5.31018	-1.27139
201.78	201.96	63.554	1.01132	0.485464	3.20667	0.482339
201.781	201.961	63.555	1.82067	2.30936	-0.965023	2.32753
201.782	201.962	63.556	1.6871	2.40167	-1.03932	2.24934
201.783	201.963	63.557	1.45225	2.12178	-1.32992	1.80671
201.784	201.964	63.558	1.69153	1.75855	-1.24825	1.16372
201.785	201.965	63.559	1.72274	1.99176	-1.06512	1.0967
201.786	201.966	63.56	1.20798	2.1003	-1.29769	1.45764
201.788	201.968	63.561	2.52818	1.80047	-1.4524	0.906111
201.789	201.969	63.562	1.74493	2.01291	-1.46512	1.08274
201.79	201.97	63.563	1.56562	1.9662	-1.24483	1.44089
201.791	201.971	63.564	0.535505	1.28484	-1.04431	1.11835
201.792	201.972	63.565	1.90667	1.2367	-0.672137	1.01502
201.793	201.973	63.566	-0.338021	0.221356	-0.878946	-0.0824581
201.794	201.974	63.567	0.901821	0.651376	-0.81004	0.601023
	201.975	63.568	0.788415	0.627441	-0.810085	0.596136
201.795	201.975	63.569	0.675009	0.603506	-0.81013	0.591249
201.796	201.976	63.57	-0.180079	0.123306	-0.851438	-0.0377771
201.797	201.977	63.571	1.29987	0.495138	-0.512389	0.502585
201.798	201.978	63.572	2.00708	1.03342	-0.415704	1.23144
201.799	201.979	63.573	0.542677	1.01798	-0.172531	0.796502
201.8	201.98	63.574	1.35774	1.4132	-0.457192	1.23284
201.801	201.981	63.575	1.48368	1.43749	-0.524121	1.38364
201.802	201.982	63.576	0.665096	0.975848	-0.136438	0.993378
201.803	201.983	63.577	0.946245	1.17912	-0.389859	1.00455
201.804	201.984	63.578	0.445456	0.520924	0.0196696	0.0299427
201.805	201.985	63.579	1.26089	1.22583	0.204679	0.886563
201.806	201.986	63.58	0.824465	1.29207	-0.550595	0.965453
201.807	201.987	63.581	0.748235	0.828763	-0.0737789	0.578682
201.808	201.988	63.582	1.42064	1.46568	-0.726885	1.12323
201.809	201.989	63.583	0.812674	0.927946	-0.00550176	0.839089
201.81	201.99	63.584	1.71756	1.36267	-0.266429	0.949395
201.811	201.991	63.585	0.645344	1.23582	-0.152934	1.02061
201.812	201.992	63.586	1.55815	1.6586	-1.01132	1.1721
201.813	201.993	63.587	1.72169	1.90963	-1.37064	1.45904
201.814	201.994	63.588	1.77828	1.87657	-1.38057	1.41506
201.815	201.995	63.589	1.18	1.61325	-1.14064	1.2845
201.816	201.996	63.59	1.6144	1.4222	-0.760461	1.60774
201.817	201.997	63.591	0.0670857	0.218922	-0.929379	-0.703106
201.819	201.999	63.592	0.267386	0.971926	-0.48524	1.20771
201.82	202	63.593	1.36382	1.48905	-0.755247	1.67476
201.821	202.001	63.594	0.590931	1.38492	-0.841099	1.45136
201.822	202.002	63.595	2.07197	1.38079	-0.694072	1.49604
201.823	202.003	63.596	1.61294	1.34398	-0.467395	1.27613
201.824	202.004	63.597	0.277638	0.65974	-0.240224	0.802087
	202.005	63.598	0.691006	0.992871	-0.0706325	0.959169
201.825	202.005	63.599	1.10438	1.326	0.0989592	1.11625
201.826	202.006	63.6	0.988303	1.12981	0.43639	1.08344
201.827	202.007	63.601	1.30197	1.25807	0.192318	1.4374
201.828	202.008	63.602	1.24042	1.31967	0.176316	1.3613
201.829	202.009	63.603	0.934153	1.03663	0.637176	0.941716
201.83	202.01	63.604	0.204525	0.228533	0.801104	0.0913792
201.831	202.011	63.605	0.471179	0.425111	0.808745	0.341314
201.832	202.012	63.606	0.391194	0.455755	0.814364	0.455809
201.833	202.013	63.607	0.122737	0.0384875	1.01061	0.126286
201.834	202.014	63.608	-0.633177	-1.03256	1.53467	-1.18413
201.835	202.015	63.609	-2.00216	-1.4312	0.538738	-1.90461
201.836	202.016	63.61	-0.0735077	0.158881	1.0499	0.358069
201.837	202.017	63.611	-1.21508	-0.351465	1.41537	-0.0747786
201.838	202.018	63.612	-0.940162	-0.164405	1.15332	-0.324015
201.839	202.019	63.613	-1.76885	-1.1203	1.08087	-1.29373
201.84	202.02	63.614	-0.25154	-1.36949	0.785866	-1.28955
201.841	202.021	63.615	-1.7981	-2.08131	0.283339	-2.18526
201.842	202.022	63.616	-1.23907	-1.4094	0.599284	-1.21764
201.843	202.023	63.617	-0.175611	-0.82299	1.47232	-0.485286
201.844	202.024	63.618	-0.305802	-0.971302	1.62003	-1.03123
201.845	202.025	63.619	-1.01741	-1.58045	0.130154	-1.60301
201.846	202.026	63.62	-0.761078	-1.50416	0.887945	-1.33772
201.847	202.027	63.621	-1.51545	-2.03272	0.840839	-2.18736
201.849	202.029	63.622	-1.32642	-1.64527	0.846098	-1.56391
201.85	202.03	63.623	-0.596827	-1.6852	0.314623	-1.61767
201.851	202.031	63.624	-2.04253	-2.07939	-0.154911	-2.21249
201.852	202.032	63.625	-1.38162	-1.95324	-0.0370108	-1.91578
201.853	202.033	63.626	-2.23517	-2.03402	-0.436605	-2.3221
201.854	202.034	63.627	-0.00779226	-0.595247	0.289227	-0.468531
201.855	202.035	63.628	-0.135055	-0.782931	0.4145	-0.488777
	202.036	63.629	-0.663688	-0.895643	0.522197	-0.596989
201.856	202.036	63.63	-1.19232	-1.00835	0.629894	-0.705201
201.857	202.037	63.631	-0.670354	-0.988341	1.16141	-0.627707
201.858	202.038	63.632	-0.102835	-0.342748	1.27522	0.176552
201.859	202.039	63.633	-0.446959	-0.0879286	0.90988	-0.052438
201.86	202.04	63.634	-0.234079	-0.362668	1.32179	-0.062212
201.861	202.041	63.635	-1.1378	-0.774516	1.15957	-0.643764
201.862	202.042	63.636	-0.465359	-0.236678	1.34265	0.0439055
201.863	202.043	63.637	-0.0665981	-0.248796	1.93246	-0.0789674
201.864	202.044	63.638	-1.48624	-0.521767	1.39892	-0.460851
201.865	202.045	63.639	0.0979532	-0.121454	1.33056	-0.116667
201.866	202.046	63.64	-0.36795	0.131836	0.987237	0.0564721
201.867	202.047	63.641	0.171517	-0.542041	0.35274	-1.29722
201.868	202.048	63.642	0.261904	0.345327	1.06244	0.385995
201.869	202.049	63.643	0.345043	0.177667	0.73004	0.2338
201.87	202.05	63.644	0.697691	0.931119	0.519365	0.735764
201.871	202.051	63.645	0.624352	-0.0786604	1.13211	0.0550758
201.872	202.052	63.646	0.405313	0.234348	0.822544	0.226819
201.873	202.053	63.647	0.0994553	0.176471	1.07997	0.0550758
201.874	202.054	63.648	0.928596	0.903751	0.683473	0.771369
201.875	202.055	63.649	0.334078	0.395892	0.232008	0.203082
201.876	202.056	63.65	0.515152	0.67992	0.131637	0.708536
201.877	202.057	63.651	0.456271	0.425132	0.159415	0.326653
201.879	202.059	63.652	0.791382	0.608208	0.654706	0.42928
201.88	202.06	63.653	-0.367199	-0.422043	0.271877	-0.850414
201.881	202.061	63.654	0.523826	0.528143	0.658931	0.433469
201.882	202.062	63.655	0.0144759	0.525532	-0.0121991	0.4216
201.883	202.063	63.656	0.757172	0.953202	0.044751	0.985699
201.884	202.064	63.657	0.541588	0.793978	-0.0855555	0.58706
201.885	202.065	63.658	0.227732	0.178863	-0.0220429	0.071133
	202.065	63.659	0.344893	0.392943	-0.0834205	0.283368
201.886	202.066	63.66	0.462054	0.607022	-0.144798	0.495603
201.887	202.067	63.661	1.18537	0.759287	-0.241842	0.707838
201.888	202.068	63.662	0.365959	0.57463	-0.0286953	0.495603
201.889	202.069	63.663	0.635843	0.499309	1.04918	0.180043
201.89	202.07	63.664	0.385411	0.460665	0.487991	0.545171
201.891	202.071	63.665	0.411172	0.185999	1.15503	-0.0978173
201.892	202.072	63.666	-0.213275	-0.127477	3.06077	-0.797355
201.893	202.073	63.667	1.18616	0.735363	3.04499	0.135362
201.894	202.074	63.668	1.15834	1.39165	0.236368	0.899827
201.895	202.075	63.669	1.1562	0.74669	0.661898	0.196799
201.896	202.076	63.67	0.829009	0.866054	1.97912	0.149325
201.897	202.077	63.671	-0.059914	0.911896	1.12482	0.956377
201.898	202.078	63.672	0.861829	1.17423	0.8532	1.30196
201.899	202.079	63.673	0.832539	1.27689	1.06046	1.56376
201.9	202.08	63.674	1.25849	1.51669	-0.132302	1.65522
201.901	202.081	63.675	1.80013	1.80399	-0.145292	2.11948
201.902	202.082	63.676	1.21121	1.37055	0.6156	1.61682
201.903	202.083	63.677	1.06416	1.26255	0.629445	1.20212
201.904	202.084	63.678	2.11365	1.905	-0.0290999	2.03152
201.905	202.085	63.679	1.3242	1.43245	-0.303422	1.55259
201.906	202.086	63.68	1.51568	1.86455	-0.424874	2.22979
201.907	202.087	63.681	0.85706	1.07617	-0.41476	1.31103
201.909	202.089	63.682	1.28695	1.2716	-1.17696	1.56795
201.91	202.09	63.683	1.47129	1.83746	-1.4377	1.29428
201.911	202.091	63.684	1.72886	1.90186	-1.48238	1.37945
201.912	202.092	63.685	1.45661	1.01911	-1.17655	0.653383
201.913	202.093	63.686	1.25233	1.39212	-1.11228	1.04504
201.914	202.094	63.687	0.602347	0.839778	-0.702927	0.811861
201.915	202.095	63.688	0.166823	0.213419	0.306578	0.359466
	202.095	63.689	0.15107	0.0407187	0.5324	0.152117
201.916	202.096	63.69	0.135317	-0.131981	0.758223	-0.0552306
201.917	202.097	63.691	-0.134454	-0.452	0.959773	-0.403603
201.918	202.098	63.692	0.396489	0.0156758	0.554964	0.269405
201.919	202.099	63.693	0.113838	-0.0359808	0.262887	0.115814
201.92	202.1	63.694	0.404525	-0.00264221	0.627242	0.188421
201.921	202.101	63.695	1.17876	0.423051	0.585889	0.719009
201.922	202.102	63.696	-0.943542	-0.976316	0.246526	-0.738711
201.923	202.103	63.697	-0.396602	-0.838468	1.09831	-0.295391
201.924	202.104	63.698	-1.42826	-0.810996	1.13844	-0.924417
201.925	202.105	63.699	0.364232	-0.405732	0.89635	-0.325411
201.926	202.106	63.7	0.108693	0.133375	0.287519	0.515849
201.927	202.107	63.701	-0.278352	-0.278629	0.0498751	0.000620725
201.928	202.108	63.702	-0.21857	-0.0774538	0.176406	-0.0377771
201.929	202.109	63.703	0.539823	0.171748	0.275248	0.264518
201.93	202.11	63.704	0.479516	0.445	0.000566326	0.362956
201.931	202.111	63.705	-0.086125	-0.106985	0.3918	0.0418111
201.932	202.112	63.706	-0.9313	-0.77668	0.780877	-0.536948
201.933	202.113	63.707	-0.666974	-0.784981	1.08779	-0.849716
201.934	202.114	63.708	-0.709896	-0.199969	0.988001	-0.338676
201.935	202.115	63.709	0.18481	0.178718	0.239919	0.647798
201.936	202.116	63.71	0.00888067	-0.502981	0.666527	-0.129932
201.937	202.117	63.711	-0.622926	-0.259022	0.411758	0.0453018
201.938	202.118	63.712	-0.12807	-0.107391	0.625669	0.285463
201.94	202.12	63.713	-0.220597	-0.927145	1.20353	-0.642368
201.941	202.121	63.714	-1.12604	-0.594956	0.88763	-0.37498
201.942	202.122	63.715	-0.347935	0.125459	0.461201	0.41043
201.943	202.123	63.716	0.523376	0.568378	0.027131	0.620571
201.944	202.124	63.717	-0.512637	-0.280658	0.753189	-0.322619
201.945	202.125	63.718	0.950413	-0.0428565	0.996002	0.415317
	202.125	63.719	0.584397	-0.0687524	0.749368	0.248461
201.946	202.126	63.72	0.218381	-0.0946484	0.502734	0.0816052
201.947	202.127	63.721	-1.07753	-0.566215	0.407757	-0.599781
201.948	202.128	63.722	0.277826	0.431207	0.546874	0.510264
201.949	202.129	63.723	-0.306328	-0.0445105	0.488485	-0.0182291
201.95	202.13	63.724	0.0726058	-0.0255059	0.588541	0.140947
201.951	202.131	63.725	0.135618	0.429261	0.448751	0.576588
201.952	202.132	63.726	0.465396	0.20025	0.914555	0.454413
201.953	202.133	63.727	-0.302911	0.172549	0.522107	0.359466
201.954	202.134	63.728	-0.503812	0.0856504	0.585934	0.381806
201.955	202.135	63.729	0.0234132	0.0669787	0.789192	0.0962661
201.956	202.136	63.73	0.155633	-0.192157	0.861245	0.133966
201.957	202.137	63.731	-1.05135	-0.971864	1.4814	-0.609555
201.958	202.138	63.732	-1.58905	-1.0188	1.16267	-0.852509
201.959	202.139	63.733	0.959914	0.246778	0.915993	0.545869
201.96	202.14	63.734	0.382031	0.358944	0.55456	0.414619
201.961	202.141	63.735	0.582332	0.557716	0.49271	0.408336
201.962	202.142	63.736	1.08455	0.455558	0.704554	0.540982
201.963	202.143	63.737	0.492246	0.638384	0.344694	0.419506
201.964	202.144	63.738	-2.01448	-1.24446	0.625534	-0.714276
201.965	202.145	63.739	-1.58267	-1.43041	0.938647	-1.06474
201.966	202.146	63.74	-0.464796	-0.83205	1.30583	-0.381263
201.967	202.147	63.741	0.0645698	-0.164862	1.17072	-0.062212
201.968	202.148	63.742	0.3322	-0.44553	0.691968	-0.245125
201.97	202.15	63.743	-0.779779	-0.403423	0.113702	-0.708691
201.971	202.151	63.744	-0.214439	-0.445291	1.2171	-0.425246
201.972	202.152	63.745	-0.558825	-0.524461	1.03201	-0.290504
201.973	202.153	63.746	-0.622851	-0.407064	1.16465	-0.357526
201.974	202.154	63.747	-0.160252	-0.66594	1.3395	-0.484588
201.975	202.155	63.748	-0.12056	-0.913228	1.35811	-0.714276
	202.155	63.749	-0.407755	-1.06707	1.38708	-0.866122
201.976	202.156	63.75	-0.69495	-1.22092	1.41605	-1.01797
201.977	202.157	63.751	-0.769603	-0.968026	1.03956	-0.755467
201.978	202.158	63.752	-1.17847	-1.11777	1.03178	-1.0424
201.979	202.159	63.753	-1.52019	-1.01695	1.24268	-0.98725
201.98	202.16	63.754	-1.03994	-1.30111	0.74757	-1.86481
201.981	202.161	63.755	-0.933178	-0.891425	1.44302	-0.435718
201.982	202.162	63.756	0.624728	-0.669133	1.6661	-0.459455
201.983	202.163	63.757	-1.96288	-1.59943	1.03259	-1.72169
201.984	202.164	63.758	0.870466	-0.160868	1.25648	0.36924
201.985	202.165	63.759	-0.338435	-0.641682	1.08603	-0.226275
201.986	202.166	63.76	-0.183459	-0.607043	1.0588	-0.300278
201.987	202.167	63.761	-0.902198	-1.06933	0.964088	-0.778505
201.988	202.168	63.762	-0.112599	-0.670808	1.16371	-0.382659
201.989	202.169	63.763	-0.386613	-0.588683	1.68457	-0.357526
201.99	202.17	63.764	-0.991345	-0.757478	1.72498	-0.410585
201.991	202.171	63.765	0.196376	-0.154679	2.10925	0.127683
201.992	202.172	63.766	0.256872	0.473252	1.10563	0.537492
201.993	202.173	63.767	0.460777	0.24009	1.61427	-0.154367
201.994	202.174	63.768	1.0114	0.815105	1.19148	0.598928
201.995	202.175	63.769	0.114964	0.144838	1.76579	0.100455
201.996	202.176	63.77	0.239485	0.36997	1.82081	0.445337
201.997	202.177	63.771	-0.54786	-0.232444	2.33912	-0.376376
201.998	202.178	63.772	-0.908994	-0.13841	1.46086	-0.125045
202	202.18	63.773	-0.371856	-0.58446	2.08376	-0.270258
202.001	202.181	63.774	-0.308619	-0.212337	2.61533	-0.182292
202.002	202.182	63.775	-0.161416	-0.339825	2.55896	-0.388942
202.003	202.183	63.776	0.705877	0.461102	1.54528	0.339918
202.004	202.184	63.777	-0.245119	0.0398606	1.1615	-0.311449
202.005	202.185	63.778	0.986838	0.793573	0.626388	0.517246
202.006	202.186	63.779	0.668288	0.208977	0.477922	0.200289
	202.186	63.78	0.401896	0.163042	0.359527	0.0802089
202.007	202.187	63.781	0.135505	0.117106	0.241132	-0.0398715
202.008	202.188	63.782	0.0716295	0.3591	0.470416	0.0843977
202.009	202.189	63.783	0.137871	0.168274	0.315343	-0.157159
202.01	202.19	63.784	-0.0611907	0.2295	-0.0494167	-0.118762
202.011	202.191	63.785	-0.800095	-0.156811	0.450324	-0.970494
202.012	202.192	63.786	-0.117105	-0.154855	0.0471782	-0.955833
202.013	202.193	63.787	-1.31628	-0.61343	0.205128	-1.39776
202.014	202.194	63.788	0.331036	-0.120196	0.996182	-0.017531
202.015	202.195	63.789	0.756572	0.0772768	0.95802	0.352484
202.016	202.196	63.79	-0.0671614	0.198232	0.709319	-0.17182
202.017	202.197	63.791	-0.807605	-0.544288	0.543682	-0.775015
202.018	202.198	63.792	1.06119	0.4181	0.591193	0.54936
202.019	202.199	63.793	0.400957	0.215666	0.445065	0.113022
202.02	202.2	63.794	-0.0377585	0.111187	0.788878	-0.0664009
202.021	202.201	63.795	0.62822	-0.0696002	0.469427	-0.11178
202.022	202.202	63.796	0.154769	0.662663	0.301588	0.687592
202.023	202.203	63.797	0.620034	0.587549	0.574967	0.642911
202.024	202.204	63.798	1.01973	0.463869	0.312915	0.65478
202.025	202.205	63.799	0.150638	0.667302	-0.00680528	0.191912
202.026	202.206	63.8	1.15774	0.297936	1.49219	0.308501
202.027	202.207	63.801	0.480792	-0.0550686	0.356111	-0.0517399
202.028	202.208	63.802	-1.17298	-0.604619	-0.0229868	-0.69403
202.03	202.21	63.803	0.272831	0.59041	0.356201	0.423695
202.031	202.211	63.804	1.04748	0.76842	0.360876	0.411826
202.032	202.212	63.805	0.150075	0.328081	0.245447	0.0348297
202.033	202.213	63.806	-0.0227003	0.116284	0.572405	-0.0999117
202.034	202.214	63.807	-0.501859	-0.233235	0.438727	-0.476908
202.035	202.215	63.808	-0.0507514	-0.0827172	0.991956	-0.0684953
202.036	202.216	63.809	-0.66258	-0.814065	2.27763	-1.46687
	202.216	63.81	-0.762674	-0.9693	1.91516	-1.5873
202.037	202.217	63.811	-0.862768	-1.12453	1.55269	-1.70773
202.038	202.218	63.812	0.499793	-0.129734	0.560628	-0.0950247
202.039	202.219	63.813	-0.198066	0.0177978	0.234525	-0.0140403
202.04	202.22	63.814	0.477976	0.611266	0.404701	0.698762
202.041	202.221	63.815	-0.989881	-0.0486609	0.0342779	0.0411129
202.042	202.222	63.816	-0.715791	-0.17956	0.857065	-0.205331
202.043	202.223	63.817	-0.965547	-0.355875	0.588361	-0.30726
202.044	202.224	63.818	-0.254131	-0.325605	0.77836	-0.12295
202.045	202.225	63.819	0.731938	0.848672	0.577259	0.471168
202.046	202.226	63.82	1.08973	0.680845	0.900171	0.573097
202.047	202.227	63.821	0.47576	0.0233837	2.11684	0.335729
202.048	202.228	63.822	0.763744	0.48924	1.23684	0.256141
202.049	202.229	63.823	0.074521	0.432496	0.790811	0.225422
202.05	202.23	63.824	0.958111	0.546534	0.427984	0.316879
202.051	202.231	63.825	-0.513087	0.254288	0.0678546	0.0697368
202.052	202.232	63.826	-0.64065	-0.102335	0.217624	0.0536795
202.053	202.233	63.827	-0.40813	-0.222167	0.266034	-0.105497
202.054	202.234	63.828	-0.354845	0.150112	0.241402	0.272198
202.055	202.235	63.829	0.451765	0.307079	0.161168	0.387391
202.056	202.236	63.83	1.05199	0.0972383	0.54166	0.242178
202.057	202.237	63.831	0.0583362	-0.0748741	0.406544	-0.255597
202.058	202.238	63.832	0.300469	0.311874	0.51523	0.190515
202.06	202.24	63.833	-0.0121107	0.0463307	0.833422	-0.189274
202.061	202.241	63.834	-0.124202	0.139107	0.238345	-0.00915326
202.062	202.242	63.835	-1.41091	-0.254632	0.34429	-0.206727
202.063	202.243	63.836	-0.454469	-0.369585	0.85266	-0.108289
202.064	202.244	63.837	-0.171067	-0.0438656	1.01663	0.133268
202.065	202.245	63.838	-0.943579	-0.369315	0.962695	-0.232559
202.066	202.246	63.839	-0.770917	-0.59299	0.8305	-0.497154
	202.246	63.84	-0.324353	-0.40814	0.80679	-0.408141
202.067	202.247	63.841	0.122212	-0.223291	0.783079	-0.319128
202.068	202.248	63.842	0.00576388	-0.403808	0.15065	-0.723352
202.069	202.249	63.843	0.293184	0.282093	0.243784	-0.264673
202.07	202.25	63.844	-0.135543	0.300307	0.292149	0.304312
202.071	202.251	63.845	0.247784	-0.0428565	0.851042	0.217045
202.072	202.252	63.846	-0.884473	-0.711147	1.60838	-0.617235
202.073	202.253	63.847	-1.23911	-0.982224	1.45102	-0.740108
202.074	202.254	63.848	-1.05845	-0.613888	1.81847	-0.670992
202.075	202.255	63.849	-0.265134	-0.394269	2.57847	-0.48389
202.076	202.256	63.85	-0.944368	-0.216352	0.419264	0.187025
202.077	202.257	63.851	-0.254206	0.17103	-0.224178	0.358069
202.078	202.258	63.852	0.143391	0.502835	-0.0354376	0.559134
202.079	202.259	63.853	-1.01038	-0.526708	0.516129	-0.148083
202.08	202.26	63.854	-0.825217	-0.18525	0.0887109	-0.0349845
202.081	202.261	63.855	-1.14966	-0.269715	-0.444112	-0.204633
202.082	202.262	63.856	0.2411	0.323982	-0.532077	0.266613
202.083	202.263	63.857	-0.183609	0.0853592	-0.615906	0.0962661
202.084	202.264	63.858	-1.52762	-1.61904	1.29873	-2.18247
202.085	202.265	63.859	-0.0723435	0.0173193	-0.234516	0.0669442
202.086	202.266	63.86	-0.184999	-0.0836014	-0.0315271	-0.0789674
202.087	202.267	63.861	-0.135731	-0.35755	0.109882	-0.219294
202.088	202.268	63.862	-1.21868	-1.53065	2.24409	-1.20298
202.089	202.269	63.863	-1.22571	-0.95779	0.805689	-0.904869
202.091	202.271	63.864	-0.80385	-1.13394	0.22985	-1.14852
202.092	202.272	63.865	-2.51868	-1.42539	0.163416	-1.41521
202.093	202.273	63.866	-0.478577	-0.409591	0.297183	-0.405
202.094	202.274	63.867	-1.00674	-0.16481	-0.497646	-0.276542
202.095	202.275	63.868	-0.148498	-0.323171	-0.310344	-0.26956
202.096	202.276	63.869	-0.653343	-0.925804	-0.280139	-1.1562
	202.276	63.87	-0.0259485	-0.345093	-0.527379	-0.402556
202.097	202.277	63.871	0.601446	0.235617	-0.77462	0.351088
202.098	202.278	63.872	0.816617	0.662902	-0.80959	0.477452
202.099	202.279	63.873	0.409294	-0.678557	-0.178375	-0.749184
202.1	202.28	63.874	-0.927057	-0.361971	0.169034	-0.169028
202.101	202.281	63.875	-1.63044	-1.0139	-0.457327	-1.24556
202.102	202.282	63.876	-1.95439	-1.05223	-0.508029	-1.4557
202.103	202.283	63.877	-1.10622	-1.18517	-0.21766	-1.51574
202.104	202.284	63.878	-1.00141	-0.602352	-0.066677	-0.527873
202.105	202.285	63.879	-1.19326	-0.564551	-0.0875333	-0.275843
202.106	202.286	63.88	-2.13288	-1.39295	-0.0786334	-1.42917
202.107	202.287	63.881	-2.12251	-0.995185	0.169753	-0.925115
202.108	202.288	63.882	0.0656963	-0.545494	0.244728	0.0453018
202.109	202.289	63.883	-0.576137	-0.74796	0.00402738	-0.403603
202.11	202.29	63.884	0.724615	-0.633215	0.358628	0.0830015
202.111	202.291	63.885	-2.06987	-1.52206	-0.133606	-1.59882
202.112	202.292	63.886	-1.65454	-1.52096	-0.473374	-2.00933
202.113	202.293	63.887	-0.817293	-1.16648	0.0506842	-1.02006
202.114	202.294	63.888	-1.72071	-1.49203	-0.195275	-1.59812
202.115	202.295	63.889	-2.32773	-2.14026	-0.299287	-3.04048
202.116	202.296	63.89	-1.41808	-1.97386	0.899362	-2.22715
202.117	202.297	63.891	-1.48868	-1.41906	0.599014	-1.20228
202.118	202.298	63.892	-1.74084	-1.29428	0.129749	-1.2679
202.119	202.299	63.893	-1.75834	-1.58138	0.0293785	-1.74683
202.121	202.301	63.894	-1.1794	-1.77965	0.390587	-1.72728
202.122	202.302	63.895	-1.33408	-1.71134	1.25181	-1.54786
202.123	202.303	63.896	-1.86664	-2.45492	0.959279	-2.4345
202.124	202.304	63.897	-2.06851	-2.64274	0.610072	-2.84012
202.125	202.305	63.898	-1.36754	-2.17971	0.107814	-2.40099
202.126	202.306	63.899	-1.32353	-1.90809	0.811487	-2.47848
	202.306	63.9	-1.208	-1.55475	0.916869	-1.7751
202.127	202.307	63.901	-1.09247	-1.20141	1.02225	-1.07173
202.128	202.308	63.902	-1.56412	-1.27157	0.524939	-1.58835
202.129	202.309	63.903	-1.26281	-0.665711	0.310443	-0.589309
202.13	202.31	63.904	-1.17054	-0.696553	-0.216087	-0.932795
202.131	202.311	63.905	-1.04662	-1.10909	-0.14309	-1.4941
202.132	202.312	63.906	-1.25826	-1.90827	1.67909	-2.41146
202.133	202.313	63.907	-0.443804	-2.0058	3.26861	-2.38074
202.134	202.314	63.908	-0.776775	-0.370084	1.07516	0.0564721
202.135	202.315	63.909	-1.44407	-0.836107	1.03034	-0.804337
202.136	202.316	63.91	-1.46172	-1.16134	0.259831	-1.26162
202.137	202.317	63.911	-0.981957	-0.530879	0.375439	-0.549515
202.138	202.318	63.912	-0.91459	-1.1431	0.279923	-0.991439
202.139	202.319	63.913	-0.797691	-1.02446	0.948311	-0.761052
202.14	202.32	63.914	-0.501108	-1.12679	0.960043	-0.587913
202.141	202.321	63.915	-1.80644	-1.70565	-0.207636	-1.9458
202.142	202.322	63.916	-2.87591	-2.34086	-0.721311	-2.75425
202.143	202.323	63.917	-1.28237	-1.50141	0.179867	-1.381
202.144	202.324	63.918	-1.20543	-1.12586	0.979056	-0.327506
202.145	202.325	63.919	-1.30903	-1.19741	1.31766	-0.846225
202.146	202.326	63.92	-0.470504	-0.692017	0.917252	-0.648651
202.147	202.327	63.921	-0.454357	-0.488668	0.152448	-0.150178
202.148	202.328	63.922	-0.0940484	-0.789339	0.294486	-0.767335
202.149	202.329	63.923	-1.38932	-1.03202	0.448031	-0.754769
202.151	202.331	63.924	0.29585	-0.289333	0.743075	0.163288
202.152	202.332	63.925	-0.659989	-0.291112	0.503139	-0.0943266
202.153	202.333	63.926	-0.248987	-0.339003	0.383035	-0.211614
202.154	202.334	63.927	0.958975	0.470173	-0.391881	0.462791
202.155	202.335	63.928	0.0890159	0.103261	-0.269531	-0.116667
202.156	202.336	63.929	-0.212862	-0.40308	0.567955	-0.428038
202.157	202.337	63.93	1.47779	0.85197	0.00816266	0.831409
	202.338	63.931	0.474502	0.402528	-0.0819371	0.40659
202.158	202.338	63.932	-0.528784	-0.0469133	-0.172037	-0.0182291
202.159	202.339	63.933	0.341926	0.3348	0.0137813	0.227517
202.16	202.34	63.934	0.493898	0.15084	-0.00568156	-0.0594195
202.161	202.341	63.935	-0.27362	-0.253311	-0.430537	-0.579535
202.162	202.342	63.936	-0.973959	-0.444688	-0.209974	-0.946758
202.163	202.343	63.937	-0.319358	-0.020929	0.237896	0.104644
202.164	202.344	63.938	-0.274033	-0.447309	1.84324	-0.372187
202.165	202.345	63.939	-0.303962	-0.31435	0.7473	-0.509023
202.166	202.346	63.94	-0.75477	0.13582	0.0131969	0.111625
202.167	202.347	63.941	1.01219	0.32548	-0.48933	0.246367
202.168	202.348	63.942	0.18252	0.0177874	-0.30949	0.0683405
202.169	202.349	63.943	-0.694274	0.0298018	-0.603635	-0.0014737
202.17	202.35	63.944	0.0844722	0.0438238	-0.181611	-0.268862
202.171	202.351	63.945	-0.265359	-0.25484	0.535187	-0.414774
202.172	202.352	63.946	0.63329	-0.214927	-0.0989503	0.138155
202.173	202.353	63.947	-0.923452	-0.966621	-0.377947	-1.78174
202.174	202.354	63.948	0.216842	-0.258335	0.271967	-0.183689
202.175	202.355	63.949	0.111397	-0.111791	1.10788	0.0320371
202.176	202.356	63.95	-0.603887	-0.353015	-0.194826	-0.571157
202.177	202.357	63.951	0.246658	-0.0182037	0.261629	-0.295391
202.178	202.358	63.952	-0.687965	0.222812	-0.18678	0.131871
202.179	202.359	63.953	-0.478803	-0.00743755	-0.835166	-0.489475
202.181	202.361	63.954	-0.305502	0.46105	-0.922187	0.702253
202.182	202.362	63.955	1.37268	1.32549	-0.84955	1.75086
202.183	202.363	63.956	0.433214	1.0351	-1.20554	1.25099
202.184	202.364	63.957	1.15499	1.46861	-1.49946	1.05621
202.185	202.365	63.958	0.987589	1.31217	-1.51434	0.990586
202.186	202.366	63.959	1.31684	1.30529	-1.5303	0.97383
202.187	202.367	63.96	1.25744	1.45932	-1.53264	1.10089
	202.368	63.961	1.18057	1.46506	-1.50342	1.12637
202.188	202.368	63.962	1.1037	1.4708	-1.4742	1.15186
202.189	202.369	63.963	1.16235	0.996309	-1.47065	0.716216
202.19	202.37	63.964	1.51838	1.09283	-1.31122	0.788125
202.191	202.371	63.965	0.777225	0.549592	-0.8976	0.335031
202.192	202.372	63.966	0.299193	0.162626	-0.394893	-0.0657027
202.193	202.373	63.967	-0.601935	-0.316191	0.0651128	-0.480399
202.194	202.374	63.968	0.0965638	-0.25278	0.0671355	-0.351243
202.195	202.375	63.969	-0.611585	0.127248	-0.137516	-0.0496455
202.196	202.376	63.97	-0.912074	-0.342051	0.473472	-0.282825
202.197	202.377	63.971	-0.0265681	-0.011744	-0.39323	-0.0999117
202.198	202.378	63.972	0.040011	0.690748	-0.741853	0.392976
202.199	202.379	63.973	-0.0261175	0.379987	-0.742167	0.334332
202.2	202.38	63.974	-0.742603	0.0526031	-0.722884	0.11372
202.201	202.381	63.975	0.971067	0.590483	-0.539179	0.753218
202.202	202.382	63.976	-0.0545816	0.00678204	-0.228987	-0.132724
202.203	202.383	63.977	0.196076	-0.387737	-0.258608	-0.214407
202.204	202.384	63.978	0.25199	0.0900609	-0.238921	-0.134121
202.205	202.385	63.979	0.00891822	0.359516	-0.272318	0.186326
202.206	202.386	63.98	0.204149	0.521736	-0.895083	0.520736
202.207	202.387	63.981	-0.253418	0.0218026	-0.544482	0.129777
202.208	202.388	63.982	-0.0351674	-0.264171	-0.191949	-0.266768
202.209	202.389	63.983	-0.579854	-0.506684	-0.267373	-0.689841
202.211	202.391	63.984	0.578014	-0.203579	-0.0265827	-0.419661
202.212	202.392	63.985	1.13543	0.117002	0.36573	0.24497
202.213	202.393	63.986	-0.601108	-0.0873357	0.0704167	-0.0335882
202.214	202.394	63.987	-1.15053	-0.424009	0.507588	-0.479003
202.215	202.395	63.988	-0.252779	0.286535	0.0758106	0.0934736
202.216	202.396	63.989	-0.47685	-0.354367	1.41268	-0.0335882
202.217	202.397	63.99	-1.12094	-1.46509	3.13736	-1.69098
	202.398	63.991	-0.965359	-0.95133	1.96732	-1.01902
202.218	202.398	63.992	-0.809783	-0.437573	0.797283	-0.347054
202.219	202.399	63.993	-0.163894	-0.160275	-0.0199303	-0.12295
202.22	202.4	63.994	-0.64388	-0.893162	0.71642	-0.351941
202.221	202.401	63.995	-0.643542	-0.484601	1.64974	-0.469927
202.222	202.402	63.996	0.0252908	-0.974714	3.4876	-0.698219
202.223	202.403	63.997	-1.52897	-1.27162	2.15514	-0.926512
202.224	202.404	63.998	-0.0674994	-0.879327	3.17323	-0.409887
202.225	202.405	63.999	-1.40622	-1.9455	5.21651	-2.24111
202.226	202.406	64	-0.450414	-1.07887	2.60171	-0.62282
202.227	202.407	64.001	0.0860118	-0.74953	2.41611	-0.475512
202.228	202.408	64.002	-1.40332	-1.1659	1.77829	-0.950946
202.229	202.409	64.003	-0.212374	-0.478651	1.35717	0.0494906
202.23	202.41	64.004	-1.17805	-0.646623	0.351257	-0.536948
202.231	202.411	64.005	-0.415453	-0.513144	0.372562	-0.541137
202.232	202.412	64.006	-0.86427	-0.873013	0.455628	-0.455266
202.233	202.413	64.007	-1.58233	-0.966216	0.764201	-0.933493
202.234	202.414	64.008	-1.71651	-1.28441	0.619511	-1.17296
202.235	202.415	64.009	-2.21677	-1.41426	0.55411	-1.56671
202.236	202.416	64.01	-0.775273	-1.05294	1.60825	-0.56627
202.237	202.417	64.011	-1.37745	-1.13277	1.07021	-0.927908
202.238	202.418	64.012	-0.802761	-0.784523	0.953031	-0.620725
202.239	202.419	64.013	-1.37287	-1.46844	1.12285	-1.38449
202.24	202.42	64.014	-1.34302	-1.66168	0.157393	-1.85923
202.242	202.422	64.015	-1.75841	-1.41183	0.0756757	-1.81874
202.243	202.423	64.016	-0.677263	-0.889209	-0.263553	-1.29024
202.244	202.424	64.017	-0.927733	-1.41856	-0.0792177	-1.96744
202.245	202.425	64.018	-0.831187	-1.48977	0.102285	-1.72868
202.246	202.426	64.019	-1.72552	-1.86768	-0.368823	-2.5448
202.247	202.427	64.02	-2.1862	-1.91275	-0.149922	-2.30185
	202.428	64.021	-1.37007	-1.65544	0.39198	-1.74648
202.248	202.428	64.022	-0.553943	-1.39813	0.933883	-1.19111
202.249	202.429	64.023	-2.18763	-1.72707	0.558291	-1.94929
202.25	202.43	64.024	-1.58714	-1.8489	1.9824	-2.2083
202.251	202.431	64.025	-1.45518	-1.20387	0.913431	-1.24207
202.252	202.432	64.026	-1.34358	-1.5628	0.164539	-1.76847
202.253	202.433	64.027	-1.67753	-2.289	1.74328	-2.5839
202.254	202.434	64.028	-1.03994	-1.65843	0.969077	-1.98908
202.255	202.435	64.029	-1.07298	-1.36347	0.092981	-1.91648
202.256	202.436	64.03	-0.830774	-1.25118	1.00508	-1.21484
202.257	202.437	64.031	-0.626418	-1.1859	0.874191	-1.35028
202.258	202.438	64.032	-0.254018	-0.622313	0.77346	-0.793865
202.259	202.439	64.033	-0.95124	-1.29609	0.465741	-1.43755
202.26	202.44	64.034	-0.220222	-0.938016	1.25819	-0.980268
202.261	202.441	64.035	-0.995664	-1.64474	0.510555	-2.17409
202.262	202.442	64.036	-1.35473	-1.17232	1.23576	-1.08639
202.263	202.443	64.037	-0.65492	-0.852916	1.32188	-0.788279
202.264	202.444	64.038	0.0745961	-0.505477	0.67264	-0.488777
202.265	202.445	64.039	0.0884526	-0.287877	0.971954	-0.221388
202.266	202.446	64.04	0.118907	-0.788382	1.04518	-0.268164
202.267	202.447	64.041	-0.725705	-0.373299	-0.0648791	-0.639575
202.268	202.448	64.042	-0.259651	-0.0870237	-0.17779	-0.327506
202.269	202.449	64.043	-0.903925	-0.0807408	-0.191365	-0.542534
202.27	202.45	64.044	0.287965	0.0437301	0.0746419	-0.117365
202.272	202.452	64.045	-0.0607025	-0.234431	0.153662	-0.53276
202.273	202.453	64.046	-0.633666	-1.0718	0.268236	-1.01029
202.274	202.454	64.047	-0.0702031	0.00410872	0.630029	-0.182991
202.275	202.455	64.048	-0.0439545	0.148177	-0.12947	-0.217898
202.276	202.456	64.049	0.879741	0.470058	0.0609325	0.0927754
202.277	202.457	64.05	0.0547688	-0.630125	-0.296815	-1.22462
202.278	202.458	64.051	0.531525	0.321975	0.449874	0.25265
	202.458	64.052	0.447428	0.184158	0.466123	0.141645
202.279	202.459	64.053	0.363331	0.0463411	0.482372	0.0306408
202.28	202.46	64.054	-1.12631	-0.818444	0.626478	-1.21833
202.281	202.461	64.055	0.22822	0.128091	0.495407	0.000620725
202.282	202.462	64.056	0.895663	0.746576	0.0406606	0.562625
202.283	202.463	64.057	0.0415506	0.549447	-0.00186091	0.318275
202.284	202.464	64.058	0.0735071	0.457805	-0.466586	0.313388
202.285	202.465	64.059	0.332651	0.474282	-0.325177	0.129777
202.286	202.466	64.06	-0.605089	-0.228512	0.0277154	-0.865075
202.287	202.467	64.061	0.897541	0.776149	-0.686476	0.299425
202.288	202.468	64.062	0.789617	0.779665	-0.734031	0.593343
202.289	202.469	64.063	1.08969	0.614532	-0.982688	0.40275
202.29	202.47	64.064	0.838059	0.969575	-1.30106	0.497698
202.291	202.471	64.065	1.20096	1.44683	-1.38664	0.938225
202.292	202.472	64.066	1.33288	1.32688	-1.27045	0.868411
202.293	202.473	64.067	0.952741	0.876747	-1.27553	0.584965
202.294	202.474	64.068	1.14993	1.37536	-1.37774	0.924262
202.295	202.475	64.069	0.513425	1.03514	-1.34048	0.805578
202.296	202.476	64.07	0.551089	0.68639	-1.52293	0.420204
202.297	202.477	64.071	1.43603	0.934333	-1.5841	0.540982
202.298	202.478	64.072	0.959914	0.527228	-1.5939	0.357371
202.299	202.479	64.073	-0.12777	0.525449	-1.55884	0.45162
202.3	202.48	64.074	-0.220823	0.368971	-1.47587	-0.215105
202.302	202.482	64.075	0.0427147	0.119977	-1.04818	-0.147385
202.303	202.483	64.076	-0.00433751	-0.119343	-1.07919	-0.279334
202.304	202.484	64.077	-0.512224	-0.113476	-1.09681	-0.0957228
202.305	202.485	64.078	-0.308919	0.152588	-1.37433	-0.495758
202.306	202.486	64.079	0.385599	0.465533	-1.5387	0.401354
202.307	202.487	64.08	0.476061	1.16985	-1.29958	1.26984
202.308	202.488	64.081	0.926568	1.77445	-1.09929	2.19418
	202.488	64.082	0.816992	1.49709	-1.15624	1.81369
202.309	202.489	64.083	0.707417	1.21972	-1.21319	1.43321
202.31	202.49	64.084	1.1853	1.47945	-1.59075	1.37666
202.311	202.491	64.085	1.16558	1.62218	-1.5806	1.27054
202.312	202.492	64.086	2.3684	1.79841	-1.57633	1.7355
202.313	202.493	64.087	0.665884	1.5479	-1.56257	1.12742
202.314	202.494	64.088	1.67527	1.66763	-1.53488	1.41645
202.315	202.495	64.089	1.67197	1.6652	-1.40593	1.62729
202.316	202.496	64.09	0.551727	0.589079	-0.934278	0.224026
202.317	202.497	64.091	2.08575	1.2777	-0.573609	1.20701
202.318	202.498	64.092	1.34057	1.05015	-0.645033	1.08833
202.319	202.499	64.093	-0.223226	0.894275	-0.989071	0.594041
202.32	202.5	64.094	0.386876	0.609623	-0.715198	0.568908
202.321	202.501	64.095	-0.109257	0.394259	-0.325177	0.645006
202.322	202.502	64.096	0.440199	-0.4375	3.23656	-0.233955
202.323	202.503	64.097	0.841025	0.513008	0.538064	0.666648
202.324	202.504	64.098	0.279478	0.379498	-0.871754	0.341314
202.325	202.505	64.099	0.300056	-0.263651	-1.26213	-0.19067
202.326	202.506	64.1	-0.504375	0.258782	-0.962911	0.397165
202.327	202.507	64.101	-0.703286	-0.278089	-0.941065	-0.111082
202.328	202.508	64.102	0.0865375	0.366017	-0.901555	0.669441
202.329	202.509	64.103	-0.486125	0.0444375	-0.746662	-0.0433622
202.33	202.51	64.104	-0.182182	-0.183066	-0.701758	-0.762448
202.332	202.512	64.105	-0.447935	0.266636	-0.744235	0.232404
202.333	202.513	64.106	1.27888	0.485505	-0.608759	0.776256
202.334	202.514	64.107	0.280079	0.072315	-0.232268	0.256839
202.335	202.515	64.108	0.192809	0.0534249	0.310173	0.494207
202.336	202.516	64.109	-0.40798	-0.00343276	0.487362	0.466281
[truncated: 29,502 more rows]

## Sheet: Composite core (20% Anth.)
	Original Depth (m)	GR Corr. Depth (m)	Adjusted Depth (m)	Al (%)	Si (%)	Ca (%)	Ti (%)	K (%)	Zr (ppm)		Ti/Al	Si/Al
Zhao et al (2022b) data	200	200.18	62.111	9.08402	25.9676	3.47586	0.58932				0.0648744	2.8586		Ratios involving Al dat of 0.004 % are removed as the 0.004% correspond to the threshold of Al data calibration and should be disregard
		200.18	62.112	9.1458	25.5872	3.33586	0.55686				0.060887	2.7977
	200.001	200.181	62.113	9.20758	25.2069	3.19586	0.5244				0.0569531	2.73762		Composite core where the anthraconite layers are reduced to 20% of their original length. The Z-score normalization was performed on this dataset.
	200.002	200.182	62.114	7.75228	24.7339	3.72964	0.53724				0.0693009	3.19054
	200.003	200.183	62.115	8.77431	24.4577	5.77071	0.52758				0.0601278	2.78742
	200.005	200.185	62.116	9.16846	24.8193	5.30157	0.50436				0.0550103	2.70703
	200.006	200.186	62.117	9.32008	24.5875	6.06457	0.54042				0.0579845	2.63812
		200.187	62.118	8.50024	23.287	5.736	0.50655				0.0595925	2.73957
	200.007	200.187	62.119	7.68039	21.9865	5.40743	0.47268				0.0615438	2.86269
	200.008	200.188	62.12	6.77006	21.0671	3.78014	0.45222				0.066797	3.1118
	200.009	200.189	62.121	8.76526	25.3097	3.09721	0.54696				0.0624009	2.8875
	200.011	200.191	62.122	8.17984	22.4943	3.84729	0.52638				0.0643509	2.74997
		200.192	62.123	7.83064	22.3052	4.51346	0.50745				0.0648032	2.84846
	200.012	200.192	62.124	7.48144	22.1161	5.17964	0.48852				0.0652976	2.95613
	200.013	200.193	62.125	7.74016	21.9651	5.77593	0.48336				0.0624483	2.83781
	200.014	200.194	62.126	7.8372	22.0974	4.87179	0.47106				0.0601056	2.81955
	200.016	200.196	62.127	7.15103	22.3895	3.26014	0.48702				0.0681049	3.13095
	200.017	200.197	62.128	9.02975	24.4183	5.25414	0.531				0.0588056	2.7042
		200.198	62.129	8.23354	23.2581	4.31736	0.52365				0.0635996	2.8248
	200.02	200.2	62.13	7.43734	22.0979	3.38057	0.5163				0.06942	2.97122
	200.019	200.199	62.131	8.44428	24.1422	3.54593	0.55374				0.0655758	2.859
	200.02	200.2	62.132	7.00195	24.8112	2.57793	0.55758				0.0796321	3.54347
	200.022	200.202	62.133	7.9947	24.0146	3.66057	0.53124				0.066449	3.00382
		200.202	62.134	7.48234	24.0402	3.63436	0.53133				0.0710113	3.21293
	200.023	200.203	62.135	6.96997	24.0658	3.60814	0.53142				0.0762442	3.45279
	200.024	200.204	62.136	6.64925	18.671	3.44207	0.46434				0.0698334	2.80798
	200.025	200.205	62.137	7.15696	19.2691	2.81157	0.4677				0.065349	2.69236
	200.027	200.207	62.138	6.92603	18.2802	3.51714	0.46392				0.0669821	2.63935
	200.028	200.208	62.139	6.20624	19.5426	3.00214	0.45306				0.0730007	3.14886
		200.209	62.14	7.21501	20.0591	3.21479	0.47058				0.0652224	2.78019
	200.029	200.209	62.141	8.22378	20.5756	3.42743	0.4881				0.0593523	2.50197
	200.03	200.21	62.142	6.92222	21.6242	3.04257	0.4908				0.0709021	3.12388
	200.031	200.211	62.143	8.31854	23.7378	2.65279	0.53436				0.0642372	2.8536
	200.033	200.213	62.144	7.65921	20.7902	2.63464	0.50472				0.0658971	2.7144
		200.214	62.145	7.83537	20.3006	3.36361	0.48771				0.0622446	2.59089
	200.034	200.214	62.146	8.01154	19.8111	4.09257	0.4707				0.0587528	2.47282
	200.035	200.215	62.147	6.58191	18.2581	2.11079	0.44022				0.0668833	2.77397
	200.036	200.216	62.148	6.28316	18.7624	2.90907	0.45018				0.0716486	2.98614
	200.038	200.218	62.149	5.97102	17.3476	2.10257	0.40434				0.067717	2.9053
	200.039	200.219	62.15	6.6042	17.2485	2.51321	0.43218				0.0654402	2.61175
		200.219	62.151	6.14205	17.2508	2.36079	0.4164				0.067795	2.80863
	200.04	200.22	62.152	5.6799	17.253	2.20836	0.40062				0.0705329	3.03755
	200.041	200.221	62.153	6.84715	18.1634	2.67564	0.46002				0.0671842	2.65269
	200.042	200.222	62.154	6.36194	18.2247	2.04	0.42684				0.0670927	2.86465
	200.044	200.224	62.155	6.09506	17.6265	1.54729	0.38616				0.0633562	2.89193
		200.225	62.156	6.16614	17.9014	2.01446	0.40038				0.0649321	2.90317
	200.045	200.225	62.157	6.23721	18.1762	2.48164	0.4146				0.066472	2.91415
	200.046	200.226	62.158	4.84264	18.001	2.10164	0.40722				0.0840906	3.71719
	200.047	200.227	62.159	5.31688	15.854	2.5405	0.34128				0.064188	2.98183
	200.049	200.229	62.16	5.37199	16.3793	1.58486	0.36108				0.0672153	3.04903
	200.05	200.23	62.161	4.3056	17.3657	1.62871	0.3606				0.0837514	4.03329
		200.231	62.162	5.55446	17.7973	1.60721	0.37488				0.0674918	3.20414
	200.051	200.231	62.163	6.80331	18.2288	1.58571	0.38916				0.0572016	2.6794
	200.052	200.232	62.164	5.10866	16.3397	1.4155	0.37254				0.0729232	3.19843
	200.053	200.233	62.165	6.47725	20.0376	0.799929	0.40794				0.0629805	3.09354
	200.055	200.235	62.166	5.13418	18.9091	0.562857	0.37434				0.0729113	3.68298
		200.236	62.167	6.20566	20.0203	1.07068	0.4098				0.0660365	3.22614
	200.056	200.236	62.168	7.27714	21.1315	1.5785	0.44526				0.0611862	2.90382
	200.057	200.237	62.169	6.34939	18.9648	1.75071	0.40962				0.0645132	2.98687
	200.058	200.238	62.17	7.73116	20.5438	1.52671	0.42084				0.0544343	2.65727
	200.06	200.24	62.171	4.02316	15.4992	1.52007	0.33642				0.0836209	3.85249
	200.061	200.241	62.172	7.04303	17.7045	1.24143	0.38922				0.0552632	2.51376
		200.242	62.173	6.65555	16.9314	1.45057	0.37086				0.0557219	2.54396
	200.062	200.242	62.174	6.26808	16.1584	1.65971	0.3525				0.0562373	2.57788
	200.063	200.243	62.175	5.05525	15.5319	2.64521	0.35382				0.0699906	3.07244
	200.065	200.245	62.176	5.47031	15.855	1.95671	0.36528				0.0667751	2.89837
	200.066	200.246	62.177	6.38767	17.4456	2.5195	0.36876				0.05773	2.73114
		200.247	62.178	5.74401	16.9528	1.99961	0.36363				0.0633059	2.95138
	200.067	200.247	62.179	5.10035	16.4599	1.47971	0.3585				0.0702893	3.22722
	200.068	200.248	62.18	6.45051	15.3301	1.50657	0.32022				0.0496426	2.37658
	200.069	200.249	62.181	4.29496	14.6351	2.42843	0.31998				0.0745013	3.40751
	200.071	200.251	62.182	8.94584	26.898	3.36807	0.62232				0.0695653	3.00676
		200.252	62.183	8.96882	25.9344	4.0175	0.61182				0.0682163	2.89162
	200.072	200.252	62.184	8.99179	24.9708	4.66693	0.60132				0.0668743	2.77707
	200.073	200.253	62.185	8.68823	24.2099	4.60586	0.5643				0.0649499	2.78651
	200.074	200.254	62.186	7.23934	25.6865	3.28421	0.5418				0.0748411	3.54818
	200.076	200.256	62.187	7.72205	26.1933	3.332	0.58818				0.0761689	3.39201
	200.077	200.257	62.188	7.94006	24.4571	3.51136	0.53358				0.067201	3.08021
		200.257	62.189	7.3364	24.3774	3.21425	0.53334				0.0726978	3.32279
	200.078	200.258	62.19	6.73274	24.2977	2.91714	0.5331				0.0791802	3.60888
	200.079	200.259	62.191	7.54735	23.1669	4.00264	0.52464				0.0695132	3.06954
	200.08	200.26	62.192	8.29414	23.7934	4.02779	0.49068				0.0591599	2.8687
	200.082	200.262	62.193	8.02016	24.5213	3.68993	0.53328				0.0664924	3.05746
		200.262	62.194	8.05505	24.6537	3.65061	0.5262				0.0653255	3.06065
	200.083	200.263	62.195	8.08994	24.786	3.61129	0.51912				0.0641686	3.06381
	200.084	200.264	62.196	7.64232	22.7605	3.65221	0.49692				0.0650221	2.97821
	200.085	200.265	62.197	8.45423	22.5914	4.53907	0.50766				0.0600481	2.6722
	200.087	200.267	62.198	6.69023	20.8817	4.25593	0.4974				0.0743472	3.12122
	200.088	200.268	62.199	8.53989	25.0227	2.51771	0.519				0.0607736	2.93009
		200.269	62.2	9.02986	25.3008	2.879	0.5355				0.0593033	2.8019
	200.089	200.269	62.201	9.51983	25.5789	3.24029	0.552				0.0579842	2.68691
	200.09	200.27	62.202	8.47218	27.3847	2.49964	0.57192				0.0675057	3.23231
	200.091	200.271	62.203	8.01058	25.5791	3.13143	0.47004				0.0586774	3.19316
	200.093	200.273	62.204	7.88628	27.7827	2.89143	0.51852				0.0657497	3.52292
		200.274	62.205	8.17314	27.3246	2.93279	0.52632				0.0643963	3.34322
	200.094	200.274	62.206	8.46	26.8665	2.97414	0.53412				0.0631348	3.17571
	200.095	200.275	62.207	9.23469	28.0777	2.348	0.5718				0.0619187	3.04047
	200.096	200.276	62.208	7.96574	25.5958	2.0735	0.53496				0.0671576	3.21324
	200.098	200.278	62.209	8.73085	27.3075	2.6875	0.56262				0.0644405	3.1277
	200.099	200.279	62.21	7.96394	27.1799	2.35593	0.54198				0.0680542	3.41287
		200.279	62.211	6.11561	20.0421	2.14804	0.4509				0.0737294	3.27721
	200.1	200.28	62.212	4.26727	12.9043	1.94014	0.35982				0.0843209	3.02402
	200.101	200.281	62.213	6.42145	15.1698	2.40479	0.4428				0.0689564	2.36236
	200.102	200.282	62.214	6.10682	15.4442	2.612	0.41496				0.0679503	2.52902
	200.103	200.283	62.215	5.27188	15.537	2.69093	0.41232				0.0782112	2.94715
	200.104	200.284	62.216	5.89304	16.3541	2.83764	0.44646				0.0757605	2.77516
	200.105	200.285	62.217	5.42531	16.7039	2.76179	0.42756				0.0788085	3.07888
	200.107	200.287	62.218	6.14118	17.0441	2.63036	0.46512				0.0757379	2.77538
	200.108	200.288	62.219	6.00755	18.5485	2.30164	0.50382				0.0838644	3.08752
	200.109	200.289	62.22	6.70341	19.723	3.61593	0.50886				0.0759106	2.94224
		200.29	62.221	6.79159	19.4669	3.40807	0.50814				0.0748191	2.86633
	200.11	200.29	62.222	6.87976	19.2108	3.20021	0.50742				0.0737555	2.79237
	200.111	200.291	62.223	7.5879	18.8606	3.85171	0.51666				0.06809	2.48561
	200.112	200.292	62.224	7.86928	21.4733	3.3565	0.56658				0.0719989	2.72875
	200.113	200.293	62.225	6.96007	19.9665	2.91643	0.54078				0.0776975	2.86872
	200.114	200.294	62.226	7.54496	21.5603	3.41286	0.57072				0.0756425	2.85758
	200.115	200.295	62.227	5.77091	18.1672	2.56036	0.49716				0.0861494	3.14807
	200.116	200.296	62.228	6.2154	17.081	2.24429	0.49134				0.079052	2.74818
	200.118	200.298	62.229	5.67625	17.1514	2.43343	0.49146				0.0865819	3.0216
	200.119	200.299	62.23	7.49372	17.6069	2.93093	0.50772				0.0677528	2.34955
	200.12	200.3	62.231	6.93402	17.5546	3.21336	0.4881				0.070392	2.53165
	200.121	200.301	62.232	6.85705	19.0358	3.40064	0.4944				0.072101	2.77609
		200.302	62.233	6.95525	18.3986	3.04689	0.48846				0.0702289	2.64528
	200.122	200.302	62.234	7.05346	17.7614	2.69314	0.48252				0.068409	2.51811
	200.123	200.303	62.235	6.49292	17.5453	2.98857	0.4911				0.0756363	2.70222
	200.124	200.304	62.236	6.10094	17.6983	3.39007	0.48162				0.0789419	2.90091
	200.125	200.305	62.237	7.1748	19.3004	2.74371	0.51714				0.0720773	2.69002
	200.126	200.306	62.238	6.71363	20.5715	2.63086	0.52068				0.0775557	3.06414
	200.127	200.307	62.239	6.92063	21.9858	2.82907	0.55044				0.0795361	3.17685
	200.128	200.308	62.24	7.26898	20.203	2.87457	0.522				0.071812	2.77934
	200.13	200.31	62.241	7.86431	20.2939	3.77829	0.53376				0.0678712	2.58051
	200.131	200.311	62.242	7.85568	19.1617	3.65893	0.50184				0.0638825	2.43921
	200.132	200.312	62.243	5.49646	18.8575	2.91536	0.46578				0.0847418	3.43084
	200.133	200.313	62.244	6.21159	17.906	2.59093	0.4626				0.0744737	2.88268
		200.314	62.245	6.37086	18.151	2.65557	0.486				0.0762848	2.84906
	200.134	200.314	62.246	6.53014	18.396	2.72021	0.5094				0.0780076	2.81709
	200.135	200.315	62.247	6.40519	19.356	3.13821	0.49032				0.0765504	3.02192
	200.136	200.316	62.248	7.62766	21.8698	3.5895	0.53586				0.0702522	2.86717
	200.137	200.317	62.249	8.58203	25.8075	3.43979	0.56844				0.0662361	3.00715
	200.138	200.318	62.25	8.51331	26.5185	3.87614	0.5805				0.0681873	3.11495
	200.139	200.319	62.251	8.77373	25.1292	4.01571	0.5901				0.0672576	2.86414
	200.14	200.32	62.252	7.62681	21.8396	3.60771	0.54132				0.0709759	2.86353
	200.142	200.322	62.253	8.06426	20.6394	3.89121	0.53802				0.0667166	2.55937
	200.143	200.323	62.254	7.77293	19.9491	4.24743	0.51756				0.0665849	2.56649
	200.144	200.324	62.255	5.28718	16.7834	4.48186	0.45084				0.0852704	3.17436
		200.325	62.256	4.94823	15.9479	4.86525	0.43968				0.0888561	3.22295
	200.145	200.325	62.257	4.60927	15.1123	5.24864	0.42852				0.0929692	3.27869
	200.146	200.326	62.258	7.20302	16.8695	4.73564	0.47928				0.0665388	2.34201
	200.147	200.327	62.259	4.84984	15.7291	4.71893	0.43848				0.0904113	3.24322
	200.148	200.328	62.26	5.72178	15.2781	4.17964	0.42798				0.0747984	2.67017
	200.149	200.329	62.261	5.83496	15.8974	4.25236	0.41742				0.0715377	2.7245
	200.15	200.33	62.262	5.0661	13.7535	3.43107	0.37398				0.0738201	2.71481
	200.151	200.331	62.263	4.03528	10.4711	2.29886	0.28056				0.0695267	2.59488
	200.153	200.333	62.264	5.73729	11.9634	2.95721	0.33756				0.0588362	2.0852
	200.154	200.334	62.265	4.69636	14.9582	2.63279	0.39294				0.0836691	3.18506
	200.155	200.335	62.266	6.39937	15.9031	2.78729	0.41136				0.0642813	2.48511
	200.156	200.336	62.267	5.66486	15.0611	2.58664	0.36804				0.0649689	2.65868
		200.337	62.268	5.5147	15.8583	2.6365	0.37149				0.0673636	2.87565
	200.157	200.337	62.269	5.36453	16.6556	2.68636	0.37494				0.0698924	3.10477
	200.158	200.338	62.27	6.19264	15.6672	1.79779	0.39078				0.063104	2.52997
	200.159	200.339	62.271	6.72316	19.9535	2.01057	0.4617				0.0686731	2.96788
	200.16	200.34	62.272	6.72877	18.7356	2.25129	0.43512				0.0646656	2.7844
	200.161	200.341	62.273	5.09066	14.5336	2.2005	0.37998				0.0746425	2.85495
	200.162	200.342	62.274	6.4845	16.2449	1.86836	0.40842				0.062984	2.5052
	200.163	200.343	62.275	6.9219	17.1582	1.86421	0.43008				0.0621332	2.47882
	200.165	200.345	62.276	6.32044	17.4474	2.54421	0.44502				0.0704097	2.76048
	200.166	200.346	62.277	8.32029	17.8311	3.00643	0.45354				0.0545101	2.14309
	200.167	200.347	62.278	6.66228	18.0789	2.8355	0.4506				0.0676345	2.71362
	200.168	200.348	62.279	6.14012	17.2288	2.65064	0.42696				0.0695361	2.80594
		200.349	62.28	5.33795	14.6783	2.77339	0.38727				0.0725503	2.7498
	200.169	200.349	62.281	4.53579	12.1278	2.89614	0.34758				0.0766306	2.6738
	200.17	200.35	62.282	4.72114	10.4588	3.10836	0.2913				0.0617013	2.21531
	200.171	200.351	62.283	5.11062	14.4094	3.08014	0.39564				0.0774152	2.81949
	200.172	200.352	62.284	5.1831	13.0097	2.3715	0.36072				0.0695954	2.51002
	200.173	200.353	62.285	7.89316	19.6936	4.19457	0.5178				0.0656011	2.49502
	200.174	200.354	62.286	8.03345	20.749	3.65236	0.5388				0.0670695	2.58282
	200.175	200.355	62.287	7.90136	23.2182	4.00671	0.5475				0.0692918	2.93851
	200.177	200.357	62.288	8.07131	22.8084	4.74957	0.56046				0.0694386	2.82587
	200.178	200.358	62.289	8.44856	22.7355	3.47564	0.53748				0.0636179	2.69105
	200.179	200.359	62.29	9.35492	25.3212	3.38307	0.58872				0.0629316	2.70673
		200.36	62.291	8.92101	25.6077	4.18282	0.58689				0.0657874	2.87049
	200.18	200.36	62.292	8.48711	25.8942	4.98257	0.58506				0.0689352	3.051
	200.181	200.361	62.293	7.20455	21.4571	4.267	0.50112				0.069556	2.97827
	200.182	200.362	62.294	8.26856	21.6475	4.58943	0.48402				0.0585374	2.61805
	200.183	200.363	62.295	8.02361	21.6504	5.97314	0.50478				0.0629119	2.69834
	200.184	200.364	62.296	9.39759	23.1175	6.46114	0.55008				0.0585342	2.45994
	200.185	200.365	62.297	7.66085	21.8351	7.42307	0.50568				0.0660083	2.85022
	200.186	200.366	62.298	6.48386	20.4827	8.34264	0.47934				0.0739281	3.15902
	200.188	200.368	62.299	8.24675	22.0997	6.32221	0.53814				0.0652548	2.6798
	200.189	200.369	62.3	6.58207	20.3788	6.35936	0.48588				0.0738187	3.0961
	200.19	200.37	62.301	7.48932	21.1433	4.82771	0.4995				0.0666949	2.82312
	200.191	200.371	62.302	7.49271	22.2979	4.17493	0.55236				0.0737196	2.97594
		200.372	62.303	7.73494	23.2607	4.08925	0.56595				0.0731679	3.00722
	200.192	200.372	62.304	7.97718	24.2235	4.00357	0.57954				0.0726498	3.0366
	200.193	200.373	62.305	8.06262	23.3954	4.67557	0.55326				0.0686203	2.90171
	200.194	200.374	62.306	9.59797	23.0948	7.89257	0.5331				0.055543	2.40621
	200.195	200.375	62.307	8.26481	23.2778	6.19557	0.56544				0.0684154	2.8165
	200.196	200.376	62.308	7.1019	22.1356	3.83707	0.54822				0.0771934	3.11686
	200.197	200.377	62.309	7.68293	19.8528	3.05507	0.49932				0.0649908	2.58401
	200.198	200.378	62.31	6.15198	19.3386	2.42943	0.50148				0.0815153	3.14347
	200.2	200.38	62.311	7.03758	19.3054	2.19171	0.47694				0.0677705	2.74319
	200.201	200.381	62.312	7.0947	20.2573	2.79129	0.49848				0.0702609	2.85527
	200.202	200.382	62.313	7.60929	19.6198	3.09086	0.51858				0.0681509	2.5784
	200.203	200.383	62.314	8.07242	23.3175	3.32636	0.5664				0.0701649	2.88854
		200.384	62.315	7.91664	23.9782	3.40754	0.60279				0.0761422	3.02884
	200.204	200.384	62.316	7.76086	24.6389	3.48871	0.63918				0.0823594	3.17477
	200.205	200.385	62.317	7.64396	21.231	3.40757	0.5991				0.0783756	2.77749
	200.206	200.386	62.318	8.47059	23.2889	3.79964	0.61644				0.0727742	2.74938
	200.207	200.387	62.319	6.28518	20.7369	3.671	0.56184				0.0893913	3.29934
	200.208	200.388	62.32	7.36735	19.7482	4.571	0.52788				0.0716513	2.6805
	200.209	200.389	62.321	7.46947	21.6189	3.78543	0.56058				0.0750495	2.8943
	200.21	200.39	62.322	6.45326	19.4005	3.78964	0.52596				0.0815029	3.0063
	200.212	200.392	62.323	8.44936	22.0425	4.08607	0.59232				0.0701024	2.60878
	200.213	200.393	62.324	6.79722	20.3163	3.83	0.53346				0.078482	2.98892
	200.214	200.394	62.325	7.58467	20.1847	4.07171	0.56766				0.0748431	2.66125
		200.394	62.326	7.15677	19.4689	3.80089	0.55083				0.0769662	2.72034
	200.215	200.395	62.327	6.72888	18.753	3.53007	0.534				0.0793595	2.78695
	200.216	200.396	62.328	6.99258	21.1793	3.92764	0.58896				0.0842265	3.02883
	200.217	200.397	62.329	8.33342	21.7868	3.71136	0.5832				0.0699833	2.61438
	200.218	200.398	62.33	5.53246	18.2235	3.9525	0.49416				0.0893201	3.29392
	200.219	200.399	62.331	6.36967	18.2105	3.82943	0.49368				0.0775048	2.85894
	200.22	200.4	62.332	6.53278	19.2661	5.53929	0.52824				0.0808599	2.94914
	200.221	200.401	62.333	6.60976	20.9021	4.46457	0.5742				0.0868716	3.16231
	200.223	200.403	62.334	6.74868	19.2066	3.04271	0.52338				0.077553	2.84598
	200.224	200.404	62.335	7.35348	20.3661	3.418	0.52782				0.0717783	2.76959
	200.225	200.405	62.336	6.56211	17.9022	3.48186	0.47184				0.0719037	2.72811
	200.226	200.406	62.337	4.74528	12.6577	2.07979	0.37668				0.07938	2.66744
		200.406	62.338	5.36546	13.3351	1.97107	0.37881				0.0706016	2.48537
	200.227	200.407	62.339	5.98564	14.0125	1.86236	0.38094				0.0636424	2.34102
	200.228	200.408	62.34	5.22185	13.4425	3.15629	0.3708				0.0710093	2.57427
	200.229	200.409	62.341	7.14891	18.8013	5.87121	0.51996				0.0727327	2.62996
	200.23	200.41	62.342	6.3117	17.0068	4.70964	0.45492				0.0720757	2.69449
	200.231	200.411	62.343	6.32774	17.3558	3.38093	0.46098				0.0728506	2.74281
	200.232	200.412	62.344	6.26707	17.3216	3.07943	0.44688				0.071306	2.76391
	200.233	200.413	62.345	6.44601	15.9757	4.61871	0.44886				0.0696338	2.47838
	200.235	200.415	62.346	5.95572	16.5085	4.78093	0.44778				0.0751848	2.77187
	200.236	200.416	62.347	6.57355	17.3896	4.28521	0.47106				0.0716599	2.6454
	200.237	200.417	62.348	7.09385	19.6389	3.77264	0.48672				0.0686115	2.76844
	200.238	200.418	62.349	6.55428	20.6555	4.26921	0.50928				0.0777019	3.15145
		200.418	62.35	6.22858	18.865	3.68232	0.46653				0.0749015	3.02877
	200.239	200.419	62.351	5.90289	17.0744	3.09543	0.42378				0.071792	2.89256
	200.24	200.42	62.352	7.45237	18.3485	4.2875	0.45882				0.061567	2.46211
	200.241	200.421	62.353	5.76455	16.3943	3.79607	0.41184				0.0714435	2.84398
	200.242	200.422	62.354	6.03312	16.5948	3.0455	0.4308				0.0714058	2.75061
	200.243	200.423	62.355	6.23245	16.3624	3.65479	0.42906				0.0688429	2.62536
	200.244	200.424	62.356	7.15055	17.4216	4.90729	0.45798				0.0640482	2.4364
	200.245	200.425	62.357	8.03134	17.4969	5.26979	0.47304				0.0588993	2.17858
	200.247	200.427	62.358	6.36739	17.1386	3.7035	0.44226				0.069457	2.69162
	200.248	200.428	62.359	5.70632	16.9812	4.15843	0.46242				0.0810365	2.97585
	200.249	200.429	62.36	7.59282	18.9563	5.22086	0.50706				0.0667815	2.49661
		200.43	62.361	6.95999	18.5995	4.91679	0.4773				0.0685777	2.67235
	200.25	200.43	62.362	6.32716	18.2427	4.61271	0.44754				0.0707332	2.88324
	200.251	200.431	62.363	6.88728	16.6005	4.60679	0.46188				0.0670628	2.41031
	200.252	200.432	62.364	7.02757	17.5586	4.27621	0.45258				0.0644006	2.49853
	200.253	200.433	62.365	6.38291	17.2084	3.21636	0.4275				0.0669758	2.69601
	200.254	200.434	62.366	5.9337	17.5794	2.92164	0.44268				0.0746044	2.96264
	200.255	200.435	62.367	5.59514	15.6438	3.22486	0.43272				0.0773385	2.79596
	200.256	200.436	62.368	7.00316	17.4286	2.92343	0.44334				0.0633057	2.48868
	200.258	200.438	62.369	5.56581	17.226	2.162	0.45444				0.0816485	3.09496
	200.259	200.439	62.37	7.23711	19.2774	5.19871	0.48012				0.0663414	2.66369
	200.26	200.44	62.371	6.99506	18.7861	5.65693	0.4875				0.069692	2.68563
	200.261	200.441	62.372	7.80972	18.1871	6.23057	0.50784				0.0650266	2.32877
		200.442	62.373	7.12009	17.4348	5.64436	0.4851				0.0681312	2.44868
	200.262	200.442	62.374	6.43045	16.6826	5.05814	0.46236				0.0719017	2.59431
	200.263	200.443	62.375	7.58292	18.3247	5.761	0.4866				0.0641705	2.41657
	200.264	200.444	62.376	7.64031	20.6189	5.62529	0.52962				0.0693192	2.6987
	200.265	200.445	62.377	7.54978	21.3752	5.23636	0.5148				0.0681874	2.83123
	200.266	200.446	62.378	8.00566	19.3361	6.28579	0.46836				0.0585036	2.41531
	200.267	200.447	62.379	6.95875	17.9197	13.726	0.43896				0.0630803	2.57513
	200.268	200.448	62.38	5.67439	10.7286	21.8471	0.21258				0.037463	1.8907
	200.272	200.452	62.381	4.68418	9.25493	24.3779	0.15774				0.033675	1.97578
	200.275	200.455	62.382	5.20068	9.29124	25.1241	0.1575				0.0302845	1.78654
	200.276	200.456	62.383	5.06351	9.71525	24.0937	0.1695				0.0334748	1.91868
	200.277	200.457	62.384	5.13371	9.49681	24.3589	0.14652				0.0285408	1.84989
	200.278	200.458	62.385	5.05019	9.59191	24.8573	0.15462				0.0306167	1.89932
	200.279	200.459	62.386	4.96668	9.68702	25.3557	0.16272				0.0327624	1.9504
	200.282	200.462	62.387	4.45484	8.64967	24.3841	0.16164				0.0362841	1.94163
	200.283	200.463	62.388	5.29115	8.75443	25.1936	0.15618				0.0295172	1.65454
	200.285	200.465	62.389	6.29873	8.75065	25.2442	0.15762				0.0250241	1.38927
	200.286	200.466	62.39	4.40179	9.17723	24.1616	0.16068				0.0365033	2.08488
	200.289	200.469	62.391	5.75423	9.71567	25.2617	0.1599				0.0277883	1.68844
	200.29	200.47	62.392	4.56607	9.8826	25.3065	0.1656				0.0362675	2.16436
	200.293	200.473	62.393	5.90437	8.3741	24.7473	0.15108				0.0255878	1.41829
	200.294	200.474	62.394	5.51451	8.31922	25.3747	0.14652				0.0265699	1.5086
	200.295	200.475	62.395	4.64056	8.63002	24.8559	0.13794				0.0297249	1.85969
	200.296	200.476	62.396	4.62259	8.49193	24.6424	0.14418				0.0311903	1.83705
	200.297	200.477	62.397	4.60461	8.35385	24.4289	0.15042				0.0326672	1.81423
	200.301	200.481	62.398	5.04016	8.4154	25.1875	0.14604				0.0289753	1.66967
	200.307	200.487	62.399	4.97769	9.60615	25.2076	0.16362				0.0328707	1.92984
	200.308	200.488	62.4	5.57434	9.05828	24.9184	0.15816				0.0283729	1.625
	200.311	200.491	62.401	5.50334	8.13083	24.3899	0.1494				0.0271471	1.47743
	200.312	200.492	62.402	4.52541	9.10821	24.9552	0.15858				0.0350421	2.01268
	200.363	200.543	62.403	5.01432	7.3129	24.9681	0.1377				0.0274613	1.4584
	200.375	200.555	62.404	5.06663	7.27127	24.6899	0.12858				0.0253778	1.43513
	200.414	200.594	62.405	4.27749	7.07537	24.9369	0.12264				0.028671	1.65409
	200.473	200.653	62.406	4.23476	8.46477	24.6543	0.14274				0.0337067	1.99888
	200.5	200.68	62.407	4.43546	5.83543	25.4086	0.09234				0.0208186	1.31563
		200.685	62.408	4.44293	5.65108	25.2326	0.0879				0.0197842	1.27193
	200.51	200.69	62.409	4.45039	5.46672	25.0566	0.08346				0.0187534	1.22837
	200.521	200.701	62.41	4.18103	5.96204	25.1836	0.09354				0.0223725	1.42597
	200.524	200.704	62.411	4.43494	5.28593	25.2821	0.07476				0.0168571	1.19189
	200.526	200.706	62.412	3.75342	5.95439	25.2744	0.08208				0.021868	1.58639
	200.527	200.707	62.413	3.08335	5.27147	24.0729	0.07296				0.0236626	1.70966
	200.546	200.726	62.414	3.79652	7.43652	24.5334	0.10998				0.0289687	1.95877
	200.547	200.727	62.415	6.33409	8.10133	24.8529	0.11088				0.0175053	1.279
	200.548	200.728	62.416	6.00305	11.9446	22.3133	0.19194				0.0319737	1.98976
	200.55	200.73	62.417	6.29529	9.75273	24.7889	0.1614				0.0256382	1.54921
	200.552	200.732	62.418	5.63072	9.37869	25.2578	0.1377				0.0244551	1.66563
	200.553	200.733	62.419	6.05229	11.172	25.3412	0.1572				0.0259736	1.84591
		200.733	62.42	6.01917	10.4631	25.3068	0.15117				0.0251147	1.7383
	200.554	200.734	62.421	5.98606	9.75427	25.2723	0.14514				0.0242463	1.6295
	200.555	200.735	62.422	5.55146	9.48318	24.4224	0.15156				0.0273009	1.70823
	200.556	200.736	62.423	6.48228	10.3817	25.2456	0.15504				0.0239175	1.60156
	200.557	200.737	62.424	5.59837	11.1548	22.7877	0.19074				0.0340706	1.99251
	200.558	200.738	62.425	5.48735	9.84811	23.2111	0.17718				0.0322888	1.79469
	200.559	200.739	62.426	7.00369	10.5908	25.0836	0.17658				0.0252124	1.51218
	200.564	200.744	62.427	5.81284	10.5147	25.2456	0.1719				0.0295725	1.80888
	200.565	200.745	62.428	6.19422	10.8061	24.1819	0.1938				0.0312872	1.74454
	200.566	200.746	62.429	5.34558	13.1896	20.779	0.27012				0.0505315	2.46739
	200.567	200.747	62.43	5.92025	11.334	23.5614	0.21534				0.0363734	1.91444
	200.568	200.748	62.431	5.86138	10.9147	24.2554	0.18933				0.0323013	1.86213
	200.57	200.75	62.432	5.80251	10.4953	24.9493	0.16332				0.0281464	1.80876
	200.573	200.753	62.433	5.57296	10.2461	25.1208	0.1659				0.0297687	1.83854
	200.574	200.754	62.434	6.16516	10.5862	24.7647	0.16368				0.0265492	1.71711
	200.575	200.755	62.435	6.7203	12.3703	24.7959	0.21462				0.0319361	1.84073
	200.577	200.757	62.436	5.90601	11.4055	25.3758	0.16788				0.0284253	1.93117
	200.579	200.759	62.437	6.03545	11.2834	23.7024	0.18696				0.030977	1.86952
	200.58	200.76	62.438	4.52128	10.8494	23.9859	0.16932				0.0374496	2.39964
	200.583	200.763	62.439	6.04514	9.82198	25.338	0.15168				0.0250912	1.62477
	200.585	200.765	62.44	4.88001	10.24	24.6483	0.14526				0.0297663	2.09835
	200.586	200.766	62.441	5.6052	10.5742	25.183	0.17112				0.0305288	1.88649
	200.59	200.77	62.442	6.73274	13.8411	24.9514	0.25146				0.0373488	2.05578
		200.771	62.443	6.94204	14.5915	24.6038	0.26172				0.0377007	2.1019
	200.591	200.771	62.444	7.15135	15.3419	24.2562	0.27198				0.038032	2.14532
	200.592	200.772	62.445	8.70724	15.6271	21.4621	0.31692				0.0363973	1.79473
	200.593	200.773	62.446	8.90074	26.7078	1.40757	0.57522				0.0646261	3.00062
	200.594	200.774	62.447	7.49896	22.2782	1.92793	0.43704				0.0582801	2.97085
	200.596	200.776	62.448	8.77002	24.3534	1.75364	0.4797				0.0546977	2.77689
	200.597	200.777	62.449	9.20864	27.5888	1.59714	0.58398				0.0634165	2.99597
	200.598	200.778	62.45	9.40939	27.2205	1.90057	0.62196				0.0660999	2.89291
	200.599	200.779	62.451	8.92096	27.6281	2.084	0.63138				0.0707749	3.09698
	200.6	200.78	62.452	9.54524	27.3428	2.77157	0.61134				0.0640466	2.86455
	200.601	200.781	62.453	8.57748	26.3516	2.62286	0.58092				0.0677262	3.07218
		200.781	62.454	8.34734	26.7513	2.54621	0.56985				0.0682672	3.20477
	200.602	200.782	62.455	8.11721	27.151	2.46957	0.55878				0.068839	3.34488
	200.603	200.783	62.456	9.32225	26.9888	3.23543	0.58398				0.0626437	2.89509
	200.604	200.784	62.457	8.93345	28.3793	2.18743	0.60462				0.0676804	3.17675
	200.605	200.785	62.458	9.24406	27.7221	3.47971	0.5829				0.0630567	2.99892
	200.606	200.786	62.459	9.52269	27.0423	2.79543	0.6003				0.0630389	2.83977
	200.608	200.788	62.46	9.25073	26.3643	3.19164	0.59958				0.0648143	2.84997
	200.609	200.789	62.461	9.58309	25.8904	3.19571	0.5883				0.0613894	2.70168
	200.61	200.79	62.462	8.76923	26.0615	3.57614	0.6042				0.0689	2.97192
	200.611	200.791	62.463	9.29303	25.2574	3.4475	0.58314				0.0627503	2.71788
	200.612	200.792	62.464	8.14796	23.3863	3.65214	0.55716				0.0683803	2.87021
	200.613	200.793	62.465	7.48774	20.0679	4.77771	0.50856				0.0679191	2.6801
		200.793	62.466	7.50613	20.389	4.22682	0.5229				0.069663	2.71631
	200.614	200.794	62.467	7.52453	20.7101	3.67593	0.53724				0.0713985	2.75235
	200.615	200.795	62.468	8.42591	22.4133	4.94493	0.57984				0.0688163	2.66005
	200.616	200.796	62.469	8.02715	21.9683	4.875	0.53598				0.0667709	2.73675
	200.617	200.797	62.47	8.77791	23.1019	5.83629	0.56862				0.0647785	2.63182
	200.618	200.798	62.471	7.63819	24.2854	3.38086	0.59088				0.0773586	3.17947
	200.62	200.8	62.472	8.16427	23.7783	2.75629	0.57354				0.07025	2.91248
	200.621	200.801	62.473	9.19699	22.7142	3.12621	0.54528				0.0592889	2.46974
	200.622	200.802	62.474	6.59441	21.5018	3.15764	0.53406				0.0809868	3.26061
	200.623	200.803	62.475	8.34697	22.0018	3.08257	0.53424				0.0640041	2.6359
	200.624	200.804	62.476	8.31976	23.4908	3.12307	0.5505				0.0661678	2.8235
	200.625	200.805	62.477	9.45625	24.9453	3.20014	0.60834				0.0643321	2.63797
		200.805	62.478	9.05638	24.1883	2.92489	0.59091				0.0652479	2.67086
	200.626	200.806	62.479	8.65652	23.4313	2.64964	0.57348				0.0662483	2.70679
	200.627	200.807	62.48	8.44444	24.9847	2.27043	0.59196				0.0701006	2.95872
	200.628	200.808	62.481	7.23399	21.5554	1.75893	0.50802				0.0702268	2.97974
	200.629	200.809	62.482	7.42638	20.4223	3.19821	0.47718				0.0642548	2.74997
	200.631	200.811	62.483	7.23092	18.7436	4.25071	0.43248				0.0598098	2.59215
	200.632	200.812	62.484	8.68092	24.392	3.53386	0.60942				0.0702022	2.80984
	200.633	200.813	62.485	8.16146	22.4356	3.85064	0.52236				0.0640032	2.74896
	200.634	200.814	62.486	5.6691	20.4261	3.77793	0.49764				0.0877811	3.60306
	200.635	200.815	62.487	7.8138	22.8682	3.44393	0.56442				0.0722337	2.92664
	200.636	200.816	62.488	7.87818	22.4365	4.1905	0.54006				0.0685514	2.84793
		200.817	62.489	8.51914	23.2928	4.13454	0.56247				0.0660243	2.73418
	200.637	200.817	62.49	9.16009	24.1492	4.07857	0.58488				0.0638509	2.63634
	200.638	200.818	62.491	8.23373	22.0619	3.65471	0.52242				0.0634488	2.67945
	200.639	200.819	62.492	7.23558	21.2057	3.53779	0.50574				0.0698963	2.93075
	200.64	200.82	62.493	7.35226	22.4576	4.01057	0.522				0.0709986	3.05452
	200.641	200.821	62.494	8.32394	21.9828	3.97286	0.5088				0.0611249	2.64092
	200.643	200.823	62.495	8.33993	22.5266	3.79614	0.51372				0.0615976	2.70105
	200.644	200.824	62.496	8.25035	24.1194	4.13893	0.57246				0.0693861	2.92344
	200.645	200.825	62.497	6.55941	21.143	3.62536	0.47328				0.0721528	3.22331
	200.646	200.826	62.498	7.82984	23.0314	4.14936	0.52848				0.0674956	2.94149
	200.647	200.827	62.499	7.43686	23.0032	3.9085	0.55038				0.0740071	3.09313
	200.648	200.828	62.5	8.23198	23.5331	3.15593	0.54606				0.066334	2.85874
		200.829	62.501	7.61241	21.3153	2.75639	0.48675				0.0639416	2.80008
	200.649	200.829	62.502	6.99284	19.0976	2.35686	0.42744				0.0611254	2.73102
	200.65	200.83	62.503	8.43109	20.3641	1.85164	0.47022				0.0557721	2.41536
	200.651	200.831	62.504	8.33543	22.9607	2.29514	0.52452				0.0629266	2.7546
	200.652	200.832	62.505	9.00159	22.9734	2.33571	0.5154				0.0572566	2.55215
	200.654	200.834	62.506	7.61606	20.4085	2.307	0.44412				0.0583136	2.67966
	200.655	200.835	62.507	7.56424	19.142	2.03579	0.4305				0.0569126	2.53059
	200.656	200.836	62.508	8.49923	24.1481	2.79364	0.54876				0.0645659	2.84121
	200.657	200.837	62.509	7.71888	22.8	2.02193	0.51774				0.0670745	2.9538
	200.658	200.838	62.51	7.16813	23.7814	1.65671	0.51438				0.0717593	3.31765
	200.659	200.839	62.511	8.70295	25.3879	2.93757	0.57588				0.0661707	2.91716
	200.66	200.84	62.512	8.43178	23.1517	2.62871	0.52332				0.0620652	2.74577
		200.841	62.513	8.06953	22.6802	2.78111	0.5175				0.0641301	2.8106
	200.661	200.841	62.514	7.70728	22.2088	2.9335	0.51168				0.0663892	2.88153
	200.662	200.842	62.515	8.32918	23.4722	2.97379	0.52044				0.0624839	2.81807
	200.663	200.843	62.516	9.8442	24.6706	3.17879	0.56904				0.0578046	2.50611
	200.664	200.844	62.517	8.36788	23.8861	3.4005	0.52884				0.0631988	2.8545
	200.666	200.846	62.518	7.76292	19.0656	2.02971	0.3801				0.0489635	2.45598
	200.667	200.847	62.519	8.84806	20.8264	1.65021	0.4479				0.0506213	2.35379
	200.668	200.848	62.52	7.37905	23.6645	2.76643	0.51366				0.0696106	3.20699
	200.669	200.849	62.521	7.3755	22.5086	4.05421	0.50628				0.0686435	3.05181
	200.67	200.85	62.522	7.63078	22.2498	3.66679	0.51294				0.0672198	2.9158
	200.671	200.851	62.523	9.43957	24.9139	3.74514	0.5658				0.0599392	2.6393
		200.851	62.524	7.63544	22.8628	3.50068	0.52482				0.0687347	2.9943
	200.672	200.852	62.525	5.83131	20.8117	3.25621	0.48384				0.0829728	3.56896
	200.673	200.853	62.526	7.83635	22.3795	5.09307	0.51174				0.0653033	2.85586
	200.674	200.854	62.527	6.71855	22.0766	4.53129	0.48744				0.0725513	3.28591
	200.675	200.855	62.528	7.39731	22.9023	4.41014	0.53718				0.0726183	3.09603
	200.676	200.856	62.529	7.53713	22.8333	4.143	0.52368				0.06948	3.02945
	200.678	200.858	62.53	5.97235	20.1237	3.99779	0.4506				0.0754477	3.36948
	200.679	200.859	62.531	8.03208	22.7044	3.80557	0.51606				0.0642499	2.82672
	200.68	200.86	62.532	9.00296	25.0481	3.64793	0.5754				0.0639123	2.78221
	200.681	200.861	62.533	7.33955	23.0245	4.03979	0.51312				0.0699116	3.13704
	200.682	200.862	62.534	8.36852	23.7153	4.2135	0.55728				0.0665924	2.83387
	200.683	200.863	62.535	7.93662	21.0192	4.17243	0.49752				0.0626866	2.64838
		200.863	62.536	6.99525	19.6496	3.95025	0.4623				0.0660877	2.809
	200.684	200.864	62.537	6.05388	18.28	3.72807	0.42708				0.0705465	3.01956
	200.685	200.865	62.538	9.01329	22.9747	3.796	0.54738				0.0607303	2.54898
	200.686	200.866	62.539	8.33495	22.3991	3.47593	0.5487				0.0658312	2.68737
	200.687	200.867	62.54	9.48341	25.161	3.27964	0.58734				0.0619334	2.65316
	200.689	200.869	62.541	7.22679	22.498	3.154	0.53478				0.0739997	3.11313
	200.69	200.87	62.542	8.42861	23.477	3.72036	0.58458				0.0693567	2.78539
	200.691	200.871	62.543	8.80465	24.8306	3.33614	0.57876				0.0657335	2.82017
	200.692	200.872	62.544	8.49124	24.2954	3.31893	0.57144				0.0672976	2.86123
	200.693	200.873	62.545	7.83429	22.509	3.68979	0.52524				0.0670437	2.87313
	200.694	200.874	62.546	8.31828	24.0373	3.10379	0.5595				0.0672615	2.88969
	200.695	200.875	62.547	7.58636	24.8607	3.1915	0.58074				0.0765505	3.27702
		200.875	62.548	7.89618	25.0451	3.22343	0.58167				0.0736648	3.17181
	200.696	200.876	62.549	8.20599	25.2296	3.25536	0.5826				0.0709969	3.07453
	200.697	200.877	62.55	7.72841	21.8791	3.55607	0.50628				0.065509	2.831
	200.698	200.878	62.551	8.46291	22.3952	4.02186	0.55506				0.0655874	2.64628
	200.699	200.879	62.552	8.65795	23.3491	4.26371	0.57954				0.0669373	2.69684
	200.701	200.881	62.553	8.23548	23.8752	3.57643	0.56514				0.0686226	2.89906
	200.702	200.882	62.554	7.11805	19.2384	4.06521	0.49746				0.0698871	2.70277
	200.703	200.883	62.555	8.13039	22.2633	3.92071	0.55338				0.0680632	2.73828
	200.704	200.884	62.556	7.3962	22.5421	3.73179	0.5268				0.0712258	3.04779
	200.705	200.885	62.557	8.64715	23.1196	3.619	0.5283				0.0610953	2.67367
	200.706	200.886	62.558	7.98549	24.2549	4.32286	0.57084				0.0714847	3.03737
		200.887	62.559	7.41685	23.3094	4.62193	0.54438				0.0733978	3.14277
	200.707	200.887	62.56	6.84821	22.364	4.921	0.51792				0.0756286	3.26567
	200.708	200.888	62.561	8.44518	24.3687	4.23314	0.56856				0.0673236	2.88551
	200.709	200.889	62.562	9.05437	23.2717	4.0465	0.55734				0.0615548	2.57022
	200.71	200.89	62.563	8.13356	23.4774	4.15321	0.5517				0.06783	2.88649
	200.711	200.891	62.564	7.09279	21.9081	3.75643	0.51798				0.073029	3.08878
	200.713	200.893	62.565	10.1208	23.1129	3.795	0.56442				0.0557682	2.2837
	200.714	200.894	62.566	6.77589	17.9732	1.77964	0.37542				0.0554053	2.65252
	200.715	200.895	62.567	6.12296	20.0662	2.6995	0.48264				0.0788246	3.2772
	200.716	200.896	62.568	7.31472	19.1184	3.0325	0.42954				0.0587227	2.61368
	200.717	200.897	62.569	7.76361	20.4472	3.31914	0.47124				0.0606986	2.63373
	200.718	200.898	62.57	5.6736	17.4535	3.01143	0.42486				0.0748837	3.07627
		200.899	62.571	6.21267	17.8955	3.07014	0.43365				0.0698009	2.88049
	200.719	200.899	62.572	6.75175	18.3376	3.12886	0.44244				0.0655297	2.71597
	200.72	200.9	62.573	6.98215	19.694	2.63614	0.44496				0.0637282	2.82063
	200.721	200.901	62.574	5.37284	17.4851	2.36836	0.4017				0.0747649	3.25434
	200.722	200.902	62.575	8.16983	19.8135	3.14014	0.50292				0.0615582	2.4252
	200.724	200.904	62.576	7.82794	23.8427	4.19136	0.57408				0.0733373	3.04584
	200.725	200.905	62.577	8.02509	21.3914	3.91	0.4761				0.0593265	2.66557
	200.726	200.906	62.578	7.70675	21.7588	4.05443	0.47886				0.0621351	2.82334
	200.727	200.907	62.579	6.58419	17.9353	3.05386	0.40038				0.0608093	2.724
	200.728	200.908	62.58	8.63036	17.944	3.94421	0.4293				0.049743	2.07917
	200.729	200.909	62.581	8.24691	20.3476	4.444	0.46842				0.0567994	2.46729
	200.73	200.91	62.582	8.79877	23.1439	3.9735	0.51522				0.0585559	2.63036
		200.911	62.583	7.92821	21.7361	4.28546	0.49413				0.0623256	2.74162
	200.731	200.911	62.584	7.05764	20.3283	4.59743	0.47304				0.0670252	2.88033
	200.732	200.912	62.585	7.67435	20.7953	5.24343	0.45954				0.05988	2.70971
	200.733	200.913	62.586	8.18418	21.9917	4.54157	0.48876				0.0597201	2.6871
	200.734	200.914	62.587	6.68276	19.8874	3.48214	0.44346				0.0663588	2.97593
	200.736	200.916	62.588	6.51404	19.1154	2.87907	0.4506				0.0691736	2.93449
	200.737	200.917	62.589	6.99184	18.6603	3.08471	0.4263				0.0609711	2.66887
	200.738	200.918	62.59	7.00237	20.6395	2.57807	0.43194				0.0616848	2.94751
	200.739	200.919	62.591	6.42928	18.9256	2.54086	0.40812				0.0634783	2.94365
	200.74	200.92	62.592	6.56952	19.3817	2.00329	0.40224				0.0612282	2.95024
	200.741	200.921	62.593	7.79437	18.9651	3.74507	0.45666				0.0585884	2.43317
		200.922	62.594	7.31922	19.5643	4.25475	0.46668				0.0637609	2.673
	200.742	200.922	62.595	6.84408	20.1635	4.76443	0.4767				0.0696515	2.94612
	200.743	200.923	62.596	5.81903	13.9507	3.1275	0.34434				0.0591748	2.39743
	200.744	200.924	62.597	6.78727	15.9437	2.89207	0.39942				0.0588484	2.34905
	200.745	200.925	62.598	6.50716	19.7935	2.81014	0.42918				0.0659551	3.0418
	200.746	200.926	62.599	7.19698	18.6115	3.39743	0.39564				0.054973	2.58602
	200.748	200.928	62.6	8.60395	21.8675	3.39171	0.46368				0.0538915	2.54157
	200.749	200.929	62.601	7.23367	19.914	2.81093	0.41922				0.057954	2.75296
	200.75	200.93	62.602	8.36762	21.4325	3.00271	0.45786				0.0547181	2.56136
	200.751	200.931	62.603	7.44284	19.7383	2.45736	0.41418				0.0556481	2.65198
	200.752	200.932	62.604	6.06738	18.7903	3.11914	0.43914				0.0723772	3.09694
	200.753	200.933	62.605	8.67224	21.5539	3.59407	0.48174				0.0555497	2.48539
		200.933	62.606	7.91894	20.5919	3.15314	0.43779				0.0552839	2.60033
	200.754	200.934	62.607	7.16564	19.6299	2.71221	0.39384				0.0549623	2.73944
	200.755	200.935	62.608	6.87706	14.9804	4.35607	0.34956				0.0508299	2.17831
	200.756	200.936	62.609	6.17977	19.55	4.2525	0.44046				0.0712745	3.16355
	200.757	200.937	62.61	6.34924	17.3173	4.47607	0.42144				0.0663765	2.72745
	200.759	200.939	62.611	8.19694	21.8746	4.83029	0.51792				0.0631846	2.66863
	200.76	200.94	62.612	7.98724	22.3576	4.43643	0.52596				0.0658501	2.79917
	200.761	200.941	62.613	7.14574	21.73	3.99621	0.51264				0.0717407	3.04098
	200.762	200.942	62.614	7.51341	18.3429	6.10486	0.4503				0.0599328	2.44135
	200.763	200.943	62.615	8.16469	20.7703	6.4615	0.46824				0.0573494	2.54391
	200.764	200.944	62.616	8.24294	22.6141	5.59221	0.54966				0.0666825	2.74345
	200.765	200.945	62.617	8.44888	21.6549	5.09064	0.52302				0.061904	2.56305
		200.945	62.618	8.12636	21.1715	5.70089	0.50613				0.0622825	2.60529
	200.766	200.946	62.619	7.80385	20.6882	6.31114	0.48924				0.0626922	2.65103
	200.767	200.947	62.62	7.33002	18.2402	7.31157	0.44226				0.0603354	2.48842
	200.768	200.948	62.621	6.50695	19.245	7.38707	0.45858				0.0704754	2.95761
	200.769	200.949	62.622	7.00359	18.8818	6.65657	0.45156				0.0644755	2.69602
	200.771	200.951	62.623	7.46989	20.2408	6.30821	0.46098				0.0617117	2.70965
	200.772	200.952	62.624	6.55142	20.1276	6.25636	0.45174				0.068953	3.07225
	200.773	200.953	62.625	7.63703	22.1534	5.94293	0.48396				0.0633702	2.90078
	200.774	200.954	62.626	8.28884	23.1105	3.91064	0.55788				0.0673049	2.78815
	200.775	200.955	62.627	8.16681	24.9606	3.56093	0.61146				0.0748713	3.05635
	200.776	200.956	62.628	9.60046	24.295	4.25614	0.61092				0.0636345	2.53061
		200.957	62.629	8.66959	23.279	4.26907	0.57969				0.0668647	2.68513
	200.777	200.957	62.63	7.73873	22.2629	4.282	0.54846				0.0708721	2.87682
	200.778	200.958	62.631	8.41966	23.4522	4.11621	0.5976				0.0709767	2.78541
	200.779	200.959	62.632	9.37789	24.265	4.51429	0.60516				0.0645305	2.58747
	200.78	200.96	62.633	7.38191	23.1792	4.38486	0.5631				0.0762811	3.14001
	200.781	200.961	62.634	8.84441	25.421	4.05064	0.64896				0.0733752	2.87424
	200.783	200.963	62.635	8.69289	25.2203	4.31879	0.6276				0.0721969	2.90126
	200.784	200.964	62.636	8.88131	22.8142	5.56379	0.5676				0.0639095	2.56879
	200.785	200.965	62.637	6.24113	20.1573	6.12693	0.50736				0.081293	3.22976
	200.786	200.966	62.638	7.77785	22.8543	4.13336	0.56538				0.072691	2.93839
	200.787	200.967	62.639	6.98246	19.3112	8.91229	0.49134				0.0703677	2.76567
	200.788	200.968	62.64	7.89596	21.8981	4.56393	0.56364				0.0713833	2.77332
		200.969	62.641	8.26867	22.4065	4.44604	0.55098				0.0666347	2.70981
	200.789	200.969	62.642	8.64138	22.915	4.32814	0.53832				0.0622956	2.65177
	200.79	200.97	62.643	7.84255	23.1467	4.01693	0.55614				0.0709132	2.95142
	200.791	200.971	62.644	7.00491	22.4752	3.70879	0.5346				0.0763179	3.2085
	200.792	200.972	62.645	8.93631	24.3109	3.46286	0.59082				0.0661145	2.72046
	200.794	200.974	62.646	8.95786	24.0304	3.13871	0.6159				0.0687553	2.6826
	200.795	200.975	62.647	7.57932	24.2945	3.09179	0.54468				0.0718639	3.20536
	200.796	200.976	62.648	7.77706	23.5585	3.36107	0.57552				0.0740023	3.02924
	200.797	200.977	62.649	7.12398	23.5014	2.97871	0.585				0.0821171	3.29891
	200.798	200.978	62.65	7.37624	22.9003	3.8495	0.56934				0.0771857	3.1046
	200.799	200.979	62.651	7.7958	24.3434	3.72714	0.59814				0.0767259	3.12263
	200.8	200.98	62.652	7.6572	21.031	6.47586	0.49746				0.0649663	2.74657
		200.981	62.653	8.31746	22.5736	5.45579	0.53703				0.0645666	2.71401
	200.801	200.981	62.654	8.97771	24.1163	4.43571	0.5766				0.0642257	2.68624
	200.802	200.982	62.655	9.40251	25.2439	4.31329	0.60474				0.0643169	2.6848
	200.803	200.983	62.656	8.45576	26.5636	2.98271	0.61098				0.072256	3.14148
	200.804	200.984	62.657	9.21701	26.5428	3.00314	0.61818				0.0670695	2.87977
	200.806	200.986	62.658	9.74054	25.3678	3.32971	0.61374				0.0630088	2.60435
	200.807	200.987	62.659	6.78579	22.4745	3.22543	0.51504				0.0758998	3.31199
	200.808	200.988	62.66	8.79734	24.3696	2.71864	0.58644				0.066661	2.77011
	200.809	200.989	62.661	9.20944	26.7247	2.85093	0.64164				0.069672	2.90188
	200.81	200.99	62.662	9.0081	24.4603	4.04436	0.60282				0.0669198	2.71537
	200.811	200.991	62.663	8.58971	23.1419	3.83986	0.57552				0.0670011	2.69414
		200.992	62.664	7.98356	22.9052	4.02839	0.558				0.0698937	2.86905
	200.812	200.992	62.665	7.37741	22.6685	4.21693	0.54048				0.0732615	3.07269
	200.813	200.993	62.666	9.95093	22.7178	4.96893	0.54786				0.0550562	2.28298
	200.814	200.994	62.667	8.70236	23.9921	4.49664	0.56184				0.0645618	2.75696
	200.815	200.995	62.668	9.37234	22.3219	4.91293	0.57372				0.0612142	2.38168
	200.816	200.996	62.669	8.86241	24.5166	4.382	0.61686				0.0696041	2.76636
	200.818	200.998	62.67	9.11038	22.4348	4.91821	0.54936				0.0603004	2.46255
	200.819	200.999	62.671	7.26094	20.3348	4.33579	0.52746				0.0726435	2.80057
	200.82	201	62.672	8.0631	22.8062	4.4515	0.57336				0.0711091	2.82846
	200.821	201.001	62.673	8.64503	24.7566	3.42243	0.58266				0.0673983	2.86368
	200.822	201.002	62.674	8.57658	24.868	3.87393	0.5679				0.0662152	2.89952
	200.823	201.003	62.675	8.40097	21.9816	4.65271	0.5547				0.0660281	2.61655
		201.004	62.676	7.52072	20.5792	5.01479	0.52605				0.0699468	2.73634
	200.824	201.004	62.677	6.64046	19.1768	5.37686	0.4974				0.0749044	2.88787
	200.825	201.005	62.678	8.10529	21.5271	5.27829	0.5409				0.0667342	2.65593
	200.826	201.006	62.679	8.36195	22.5629	4.83236	0.51948				0.0621242	2.69828
	200.827	201.007	62.68	7.98639	19.4932	6.44364	0.49068				0.0614395	2.44081
	200.829	201.009	62.681	7.74964	17.7805	6.87229	0.47886				0.0617913	2.29437
	200.83	201.01	62.682	8.38673	24.5408	2.57464	0.54774				0.0653103	2.92615
	200.831	201.011	62.683	10.8542	26.2602	1.66593	0.56052				0.051641	2.41937
	200.832	201.012	62.684	8.68706	24.7836	2.17657	0.53748				0.0618713	2.85293
	200.833	201.013	62.685	8.77135	26.1598	2.7295	0.56022				0.0638693	2.98241
	200.834	201.014	62.686	8.38858	24.6589	2.80986	0.5076				0.0605108	2.93958
	200.835	201.015	62.687	8.31648	23.8447	2.34529	0.53544				0.064383	2.86716
		201.016	62.688	8.86749	25.5863	1.94771	0.55317				0.0623818	2.88541
	200.836	201.016	62.689	9.4185	27.328	1.55014	0.5709				0.0606147	2.90152
	200.837	201.017	62.69	8.49028	26.9255	1.64493	0.52872				0.0622735	3.17134
	200.838	201.018	62.691	9.08471	25.3229	2.05057	0.56754				0.062472	2.78742
	200.839	201.019	62.692	8.14394	22.5765	2.965	0.51534				0.0632789	2.77219
	200.841	201.021	62.693	8.41924	23.9636	2.32186	0.54324				0.0645237	2.84629
	200.842	201.022	62.694	8.10651	23.6754	2.70279	0.54558				0.0673015	2.92054
	200.843	201.023	62.695	8.31695	22.7442	3.63593	0.51144				0.0614937	2.73468
	200.844	201.024	62.696	7.95817	22.6231	3.92386	0.51198				0.0643339	2.84275
	200.845	201.025	62.697	8.27142	23.9631	3.09421	0.53802				0.0650456	2.8971
	200.846	201.026	62.698	9.02197	24.1474	3.33186	0.52266				0.0579319	2.67651
		201.026	62.699	8.47151	23.109	3.20025	0.50934				0.0601238	2.72785
	200.847	201.027	62.7	7.92106	22.0707	3.06864	0.49602				0.0626204	2.78633
	200.848	201.028	62.701	8.65239	24.0815	2.72721	0.53106				0.0613773	2.78322
	200.849	201.029	62.702	7.74302	22.7572	2.90436	0.49632				0.064099	2.93906
	200.85	201.03	62.703	8.65726	23.4314	3.68864	0.5586				0.0645239	2.70656
	200.851	201.031	62.704	6.79918	21.3947	2.77521	0.47538				0.0699172	3.14666
	200.853	201.033	62.705	6.69034	21.1827	2.82579	0.45216				0.0675841	3.16616
	200.854	201.034	62.706	6.93704	20.9933	4.27764	0.52938				0.0763121	3.02627
	200.855	201.035	62.707	6.37735	19.0223	3.77321	0.474				0.0743256	2.98279
	200.856	201.036	62.708	6.94387	22.188	3.8535	0.52842				0.0760988	3.19534
	200.857	201.037	62.709	8.79416	22.8351	3.63479	0.55674				0.0633079	2.59662
	200.858	201.038	62.71	7.81089	22.8328	3.42	0.5223				0.0668682	2.9232
		201.038	62.711	7.24267	22.4639	3.3155	0.51615				0.0712651	3.1016
	200.859	201.039	62.712	6.67445	22.0949	3.211	0.51				0.0764108	3.31037
	200.86	201.04	62.713	7.53009	23.4482	3.2305	0.51354				0.0681984	3.11394
	200.861	201.041	62.714	9.46096	25.8338	2.55164	0.58908				0.0622643	2.73057
	200.862	201.042	62.715	6.07939	21.5038	2.28786	0.49446				0.0813338	3.53716
	200.864	201.044	62.716	7.20858	20.4427	0.9545	0.46716				0.0648061	2.83588
	200.865	201.045	62.717	9.20578	23.3732	1.24857	0.54072				0.058737	2.53897
	200.866	201.046	62.718	7.42881	20.8755	1.62007	0.46386				0.0624407	2.81007
	200.867	201.047	62.719	6.68245	17.4876	1.37271	0.34434				0.051529	2.61694
	200.868	201.048	62.72	8.51088	23.7744	2.14943	0.549				0.0645057	2.79342
	200.869	201.049	62.721	7.85663	25.2855	2.05521	0.54984				0.0699842	3.21837
		201.05	62.722	8.42516	24.8844	2.06575	0.54108				0.0642219	2.95358
	200.87	201.05	62.723	8.9937	24.4833	2.07629	0.53232				0.0591881	2.72228
	200.871	201.051	62.724	8.47244	24.9167	2.1345	0.55446				0.0654428	2.94092
	200.872	201.052	62.725	8.57965	23.9643	2.3895	0.54396				0.0634012	2.79316
	200.873	201.053	62.726	7.25882	22.6673	1.93257	0.50586				0.069689	3.12272
	200.874	201.054	62.727	6.91041	19.036	1.62193	0.43344				0.0627227	2.75469
	200.876	201.056	62.728	7.18364	21.0286	1.58186	0.4653				0.0647722	2.92728
	200.877	201.057	62.729	7.95759	22.2871	1.43664	0.48732				0.0612397	2.80074
	200.878	201.058	62.73	6.95404	20.2427	0.885357	0.43452				0.0624846	2.91093
	200.879	201.059	62.731	6.78658	18.0453	1.20329	0.37002				0.0545223	2.65897
	200.88	201.06	62.732	6.52574	18.8592	1.773	0.41034				0.0628802	2.88997
	200.881	201.061	62.733	5.81543	17.9906	1.29693	0.38292				0.0658455	3.09359
		201.062	62.734	5.76408	17.0552	1.23768	0.35997				0.0624506	2.95888
	200.882	201.062	62.735	5.71272	16.1199	1.17843	0.33702				0.0589946	2.82175
	200.883	201.063	62.736	7.68552	18.6105	1.7815	0.43602				0.0567326	2.4215
	200.884	201.064	62.737	5.29645	16.2259	1.48386	0.36312				0.0685592	3.06354
	200.885	201.065	62.738	5.55787	16.1198	1.36864	0.34434				0.0619554	2.90036
	200.886	201.066	62.739	6.30688	15.5588	0.969071	0.28422				0.0450651	2.46695
	200.888	201.068	62.74	8.28138	21.3575	1.43536	0.4299				0.0519117	2.57898
	200.889	201.069	62.741	7.35919	21.5332	1.14443	0.42888				0.0582781	2.92603
	200.89	201.07	62.742	7.09978	19.7835	1.16871	0.3744				0.052734	2.78649
	200.891	201.071	62.743	8.23532	21.5722	1.19893	0.42126				0.0511529	2.61947
	200.892	201.072	62.744	6.99416	19.5667	1.09964	0.41262				0.0589949	2.79758
	200.893	201.073	62.745	6.5538	19.3155	0.928	0.39654				0.0605054	2.94722
		201.074	62.746	6.72996	19.8251	0.902107	0.39708				0.0590018	2.94579
	200.894	201.074	62.747	6.90612	20.3346	0.876214	0.39762				0.057575	2.94443
	200.895	201.075	62.748	6.42616	19.5271	0.929071	0.40122				0.0624354	3.03868
	200.896	201.076	62.749	5.67561	19.2655	1.09021	0.3909				0.0688736	3.39443
	200.897	201.077	62.75	7.59108	19.7855	0.989929	0.4092				0.0539054	2.60642
	200.899	201.079	62.751	7.40314	20.2803	1.22436	0.43494				0.0587508	2.73942
	200.9	201.08	62.752	6.37459	17.9454	0.867786	0.34998				0.0549023	2.81515
	200.901	201.081	62.753	5.97176	16.6322	1.08421	0.34356				0.0575307	2.78514
	200.902	201.082	62.754	5.83941	18.7975	0.870857	0.40278				0.0689761	3.21907
	200.903	201.083	62.755	6.52098	21.1017	0.617643	0.44178				0.0677475	3.23597
	200.904	201.084	62.756	6.19777	19.521	0.497071	0.38652				0.0623644	3.14969
		201.084	62.757	6.87129	20.6109	0.544714	0.41787				0.0608139	2.99957
	200.905	201.085	62.758	7.54481	21.7008	0.592357	0.44922				0.0595403	2.87626
	200.906	201.086	62.759	8.65509	24.8304	1.37743	0.5886				0.0680062	2.86888
	200.907	201.087	62.76	8.16284	22.1962	1.38786	0.49974				0.0612213	2.71917
	200.908	201.088	62.761	6.88352	21.6735	1.17221	0.486				0.0706034	3.14861
	200.909	201.089	62.762	7.48938	23.2141	1.01336	0.52176				0.0696667	3.0996
	200.911	201.091	62.763	6.10602	20.4515	0.817286	0.4746				0.0777265	3.3494
	200.912	201.092	62.764	7.13875	18.5616	0.804071	0.41292				0.0578421	2.60012
	200.913	201.093	62.765	7.90719	24.4603	1.14493	0.5394				0.0682164	3.09343
	200.914	201.094	62.766	7.15992	21.8525	1.02729	0.48012				0.0670566	3.05205
	200.915	201.095	62.767	7.16961	18.8054	1.22914	0.42078				0.0586894	2.62293
	200.916	201.096	62.768	7.02529	21.323	1.31521	0.49812				0.0709038	3.03518
		201.096	62.769	7.24487	21.2156	1.23914	0.48066				0.0663449	2.92837
	200.917	201.097	62.77	7.46444	21.1082	1.16307	0.4632				0.0620542	2.82784
	200.918	201.098	62.771	7.14674	19.0499	0.680286	0.40176				0.0562158	2.66554
	200.919	201.099	62.772	8.5554	24.1733	0.742	0.51606				0.0603198	2.82551
	200.92	201.1	62.773	5.61256	19.1867	0.820071	0.4155				0.0740304	3.41853
	200.922	201.102	62.774	5.57201	17.8106	1.60057	0.43482				0.0780365	3.19644
	200.923	201.103	62.775	6.95446	18.0106	5.9065	0.41274				0.059349	2.58979
	200.924	201.104	62.776	6.34214	20.4887	6.61321	0.489				0.0771033	3.23056
	200.925	201.105	62.777	6.41801	18.5092	6.86621	0.49746				0.0775101	2.88394
	200.926	201.106	62.778	4.38676	13.547	9.14971	0.3741				0.0852794	3.08816
	200.927	201.107	62.779	5.57328	13.8483	9.52479	0.37122				0.0666071	2.48477
	200.928	201.108	62.78	7.24526	16.5017	8.9935	0.45672				0.063037	2.27759
		201.108	62.781	8.18862	18.9035	8.054	0.52701				0.0643588	2.3085
	200.929	201.109	62.782	9.13198	21.3052	7.1145	0.5973				0.0654075	2.33303
	200.93	201.11	62.783	5.61018	12.917	10.0152	0.37176				0.0662653	2.30242
	200.931	201.111	62.784	6.29338	17.5178	6.75314	0.51492				0.0818193	2.78353
	200.932	201.112	62.785	6.75201	18.2964	5.28936	0.53526				0.0792742	2.70977
	200.934	201.114	62.786	6.55163	18.8956	5.85693	0.52062				0.0794642	2.8841
	200.935	201.115	62.787	6.84334	18.3382	7.28221	0.51042				0.0745864	2.67972
	200.936	201.116	62.788	7.30186	20.451	5.31321	0.57078				0.0781691	2.8008
	200.937	201.117	62.789	6.95292	19.3656	5.48214	0.5316				0.076457	2.78524
	200.938	201.118	62.79	6.90051	18.5402	6.54379	0.5055				0.0732554	2.68679
	200.939	201.119	62.791	6.57762	19.4458	5.28886	0.51144				0.0777545	2.95636
		201.12	62.792	6.78865	20.035	4.93775	0.52704				0.0776355	2.95125
	200.94	201.12	62.793	6.99967	20.6242	4.58664	0.54264				0.0775236	2.94646
	200.941	201.121	62.794	6.67779	20.6863	4.73729	0.52614				0.0787896	3.09778
	200.942	201.122	62.795	6.7716	20.5684	5.2205	0.5484				0.0809853	3.03745
	200.943	201.123	62.796	6.76414	19.6609	4.77314	0.5514				0.0815182	2.90664
	200.944	201.124	62.797	8.09068	22.0198	4.4875	0.56508				0.0698433	2.72162
	200.946	201.126	62.798	7.76954	21.864	3.77836	0.53754				0.0691856	2.81406
	200.947	201.127	62.799	8.72211	25.0797	3.71636	0.615				0.0705104	2.87542
	200.948	201.128	62.8	7.10936	21.3905	4.85864	0.53676				0.0755004	3.00877
	200.949	201.129	62.801	8.51008	23.1332	4.592	0.56448				0.0663307	2.71833
	200.95	201.13	62.802	7.12445	23.783	3.72843	0.5691				0.0798798	3.33822
	200.951	201.131	62.803	7.89416	23.1514	4.431	0.58896				0.074607	2.93273
		201.132	62.804	8.77463	24.2914	3.99579	0.59913				0.0682798	2.76837
	200.952	201.132	62.805	9.65509	25.4315	3.56057	0.6093				0.0631066	2.63399
	200.953	201.133	62.806	8.21044	25.1087	4.18086	0.59838				0.0728804	3.05815
	200.954	201.134	62.807	6.6501	17.0534	5.74171	0.49728				0.0747778	2.56438
	200.955	201.135	62.808	4.75444	14.4847	6.12614	0.4761				0.100138	3.04656
	200.957	201.137	62.809	5.90284	12.989	6.56079	0.43086				0.072992	2.20047
	200.958	201.138	62.81	6.80972	14.3285	6.4775	0.4545				0.0667429	2.10413
	200.959	201.139	62.811	6.35617	15.6065	5.98336	0.46686				0.0734499	2.45534
	200.96	201.14	62.812	5.41075	16.1572	5.12414	0.48132				0.0889563	2.98612
	200.961	201.141	62.813	5.30534	17.1061	5.14829	0.49296				0.0929177	3.22432
	200.962	201.142	62.814	6.46205	18.1105	5.61486	0.5286				0.0818006	2.80259
	200.963	201.143	62.815	5.9103	18.1476	5.14507	0.50448				0.0853561	3.07051
		201.144	62.816	6.0642	17.9467	4.95936	0.51339				0.0846591	2.95946
	200.964	201.144	62.817	6.2181	17.7458	4.77364	0.5223				0.0839967	2.8539
	200.965	201.145	62.818	6.10496	17.8706	4.67457	0.5013				0.0821135	2.92722
	200.966	201.146	62.819	6.10544	16.8987	4.7965	0.50004				0.0819007	2.76781
	200.967	201.147	62.82	6.29598	18.3684	4.65536	0.50802				0.0806896	2.91748
	200.969	201.149	62.821	6.49556	18.3263	4.23471	0.47988				0.0738781	2.82135
	200.97	201.15	62.822	8.08438	19.0232	4.43336	0.4812				0.0595222	2.35307
	200.971	201.151	62.823	5.9958	17.7548	5.02843	0.4692				0.0782548	2.9612
	200.972	201.152	62.824	7.28767	21.4149	4.54171	0.5604				0.076897	2.93851
	200.973	201.153	62.825	8.08126	21.2493	3.97543	0.5556				0.0687517	2.62946
	200.974	201.154	62.826	8.6004	22.0127	4.84407	0.53976				0.0627599	2.55949
		201.154	62.827	8.6809	22.078	4.69307	0.53811				0.0619878	2.54328
	200.975	201.155	62.828	8.76139	22.1432	4.54207	0.53646				0.06123	2.52736
	200.976	201.156	62.829	9.26926	24.1692	3.64179	0.58758				0.0633902	2.60746
	200.977	201.157	62.83	8.15781	23.4888	3.4285	0.55626				0.0681874	2.8793
	200.978	201.158	62.831	6.94488	21.9963	3.6715	0.52944				0.0762346	3.16727
	200.979	201.159	62.832	7.87368	22.4449	4.25936	0.52308				0.066434	2.85063
	200.981	201.161	62.833	8.63603	24.4297	3.80357	0.56184				0.0650577	2.82881
	200.982	201.162	62.834	9.08492	24.9911	4.06286	0.56358				0.0620347	2.75083
	200.983	201.163	62.835	9.40992	23.1406	5.09214	0.52002				0.0552629	2.45916
	200.984	201.164	62.836	8.10916	22.2404	4.82029	0.49248				0.0607313	2.74263
	200.985	201.165	62.837	8.07745	25.0374	3.93607	0.53322				0.0660134	3.09967
	200.986	201.166	62.838	7.72597	22.6194	6.67493	0.47148				0.0610253	2.92771
		201.166	62.839	8.20106	23.3014	5.91993	0.49404				0.060241	2.84127
	200.987	201.167	62.84	8.67616	23.9835	5.16493	0.5166				0.0595425	2.7643
	200.988	201.168	62.841	8.30689	24.8431	3.59286	0.51366				0.0618354	2.99066
	200.989	201.169	62.842	8.67589	26.7462	3.092	0.57474				0.0662456	3.08281
	200.99	201.17	62.843	8.09036	25.6577	3.53821	0.5526				0.0683035	3.17138
	200.992	201.172	62.844	8.33035	24.8495	3.79357	0.53874				0.064672	2.98301
	200.993	201.173	62.845	8.45545	23.8286	5.34957	0.49956				0.0590814	2.81814
	200.994	201.174	62.846	8.10852	24.89	3.85	0.5451				0.0672256	3.06961
	200.995	201.175	62.847	8.23061	22.182	3.80193	0.50292				0.0611036	2.69506
	200.996	201.176	62.848	9.24771	23.9577	2.16093	0.53484				0.0578348	2.59067
	200.997	201.177	62.849	8.19699	23.9282	2.505	0.51648				0.0630085	2.91915
	200.998	201.178	62.85	7.94123	22.7696	2.31771	0.49116				0.0618494	2.86726
		201.178	62.851	8.43816	23.6618	2.42843	0.5187				0.0614707	2.80415
	200.999	201.179	62.852	8.93509	24.5541	2.53914	0.54624				0.0611342	2.74805
	201	201.18	62.853	7.09952	23.771	2.50279	0.50556				0.0712105	3.34826
	201.001	201.181	62.854	8.32389	24.1207	2.22579	0.52728				0.0633454	2.89777
	201.002	201.182	62.855	7.90936	23.3068	3.52707	0.4824				0.060991	2.94673
	201.004	201.184	62.856	7.72962	22.7768	3.53964	0.50316				0.065095	2.94669
	201.005	201.185	62.857	8.15114	24.698	3.08986	0.5361				0.0657699	3.03
	201.006	201.186	62.858	7.48493	23.6449	3.1895	0.5226				0.0698203	3.159
	201.007	201.187	62.859	8.69522	23.0985	3.75807	0.52788				0.0607092	2.65646
	201.008	201.188	62.86	8.46461	23.8082	5.23464	0.54636				0.0645464	2.81267
	201.009	201.189	62.861	8.63968	25.4077	4.62421	0.5661				0.0655232	2.94082
		201.19	62.862	8.39478	24.3145	4.46054	0.54495				0.0649154	2.89638
	201.01	201.19	62.863	8.14987	23.2212	4.29686	0.5238				0.064271	2.84928
	201.011	201.191	62.864	8.03377	22.4065	4.29043	0.54174				0.0674328	2.78904
	201.012	201.192	62.865	9.03388	24.0375	5.20914	0.54456				0.0602797	2.66082
	201.013	201.193	62.866	9.41956	23.6315	4.22671	0.57252				0.0607799	2.50877
	201.014	201.194	62.867	8.80078	22.7745	4.57279	0.52146				0.0592516	2.58778
	201.016	201.196	62.868	8.28985	20.5933	4.49121	0.50916				0.0614197	2.48416
	201.017	201.197	62.869	9.24517	22.4789	5.15514	0.51876				0.0561115	2.43142
	201.018	201.198	62.87	9.71084	23.0612	5.15143	0.56352				0.05803	2.37479
	201.019	201.199	62.871	7.94144	23.3592	4.45429	0.55104				0.0693879	2.94143
	201.02	201.2	62.872	8.29451	23.485	6.30029	0.50442				0.0608137	2.83139
	201.021	201.201	62.873	7.94642	24.0693	2.93086	0.54594				0.0687027	3.02895
		201.202	62.874	8.62631	24.0271	3.70089	0.56901				0.0659621	2.78533
	201.022	201.202	62.875	9.30621	23.9849	4.47093	0.59208				0.063622	2.5773
	201.023	201.203	62.876	7.62708	20.9965	4.56907	0.52044				0.0682358	2.75289
	201.024	201.204	62.877	7.71152	22.2596	4.85757	0.50688				0.0657303	2.88654
	201.025	201.205	62.878	7.78262	23.7859	4.26143	0.54444				0.0699559	3.05628
	201.027	201.207	62.879	7.29789	20.5658	5.8725	0.50646				0.0693982	2.81805
	201.028	201.208	62.88	5.69038	19.1426	6.31879	0.46056				0.0809366	3.36402
	201.029	201.209	62.881	5.85948	17.1111	6.73279	0.43224				0.0737677	2.92024
	201.03	201.21	62.882	7.20069	19.1429	5.84657	0.47274				0.0656521	2.65848
	201.031	201.211	62.883	7.65254	21.6993	4.78421	0.49926				0.0652411	2.83556
	201.032	201.212	62.884	8.01905	21.0371	3.99964	0.48252				0.0601717	2.62338
	201.033	201.213	62.885	8.58711	21.2209	3.49907	0.47628				0.0554645	2.47125
		201.214	62.886	7.51315	19.2913	3.09625	0.41349				0.0550355	2.56768
	201.034	201.214	62.887	6.43918	17.3618	2.69343	0.3507				0.0544634	2.69628
	201.035	201.215	62.888	7.50425	16.2158	1.92879	0.32946				0.0439031	2.16088
	201.036	201.216	62.889	6.92465	7.62617	1.63257	0.15468				0.0223376	1.10131
	201.037	201.217	62.89	7.35491	8.52231	1.81629	0.17838				0.0242532	1.15873
	201.039	201.219	62.891	7.16178	16.2212	2.07579	0.3438				0.0480048	2.26497
	201.04	201.22	62.892	5.56729	17.1391	3.59286	0.39894				0.0716578	3.07854
	201.041	201.221	62.893	8.37328	21.6021	5.30271	0.51012				0.0609223	2.57989
	201.042	201.222	62.894	8.85478	24.259	4.6535	0.55818				0.0630371	2.73965
	201.043	201.223	62.895	7.49049	21.5984	5.73479	0.51546				0.0688153	2.88344
	201.044	201.224	62.896	6.20915	18.486	4.61471	0.4416				0.0711208	2.97722
		201.225	62.897	7.17189	19.8012	3.57361	0.46755				0.065192	2.76095
	201.045	201.225	62.898	8.13462	21.1164	2.5325	0.4935				0.0606666	2.59587
	201.046	201.226	62.899	6.56852	18.5259	3.907	0.44694				0.0680427	2.8204
	201.047	201.227	62.9	9.07666	23.4744	4.22864	0.58482				0.0644312	2.58623
	201.048	201.228	62.901	5.82321	18.7086	3.0945	0.42486				0.0729597	3.21277
	201.049	201.229	62.902	6.00734	17.0245	2.11536	0.36036				0.0599866	2.83395
	201.051	201.231	62.903	7.26141	21.5457	3.43857	0.5445				0.0749854	2.96715
	201.052	201.232	62.904	7.69654	21.3074	4.23643	0.50094				0.0650864	2.76845
	201.053	201.233	62.905	6.25373	19.1728	4.14343	0.4431				0.0708537	3.06581
	201.054	201.234	62.906	7.44798	19.0435	3.42564	0.4389				0.0589288	2.55688
	201.055	201.235	62.907	7.82629	22.5487	2.062	0.52362				0.0669052	2.88114
	201.056	201.236	62.908	6.25204	21.1744	1.5155	0.46626				0.0745773	3.38681
		201.237	62.909	6.49469	19.861	1.47136	0.43959				0.0676845	3.05804
	201.057	201.237	62.91	6.73735	18.5476	1.42721	0.41292				0.0612882	2.75295
	201.058	201.238	62.911	8.05378	21.2053	1.46643	0.48966				0.0607988	2.63297
	201.059	201.239	62.912	7.05812	20.9505	1.3805	0.46608				0.0660346	2.96829
	201.06	201.24	62.913	8.43554	19.5623	1.93114	0.42228				0.0500596	2.31903
	201.062	201.242	62.914	8.10656	20.4943	1.67636	0.46638				0.0575312	2.52811
	201.063	201.243	62.915	6.23626	19.3722	1.73071	0.43224				0.0693108	3.10638
	201.064	201.244	62.916	6.45432	15.6437	2.676	0.32958				0.0510634	2.42376
	201.065	201.245	62.917	6.35469	20.2426	3.9215	0.44394				0.0698602	3.18546
	201.066	201.246	62.918	7.28301	21.0263	3.66507	0.48438				0.0665082	2.88704
	201.067	201.247	62.919	7.46825	19.4699	2.57114	0.45312				0.0606728	2.60702
	201.068	201.248	62.92	6.80548	20.16	2.19436	0.47586				0.069923	2.96231
		201.249	62.921	6.44826	18.9924	2.30157	0.43125				0.0668785	2.94535
	201.069	201.249	62.922	6.09104	17.8248	2.40879	0.38664				0.0634768	2.9264
	201.07	201.25	62.923	7.05722	21.2653	2.87286	0.53868				0.0763304	3.01327
	201.071	201.251	62.924	7.71866	23.8915	3.54629	0.56844				0.0736449	3.09529
	201.072	201.252	62.925	8.55773	24.8399	3.05857	0.60054				0.0701752	2.90262
	201.074	201.254	62.926	8.07898	22.619	3.01329	0.50796				0.0628743	2.79973
	201.075	201.255	62.927	10.1468	23.3736	3.91093	0.57216				0.0563884	2.30355
	201.076	201.256	62.928	8.36418	24.7251	2.37229	0.58932				0.0704576	2.95607
	201.077	201.257	62.929	7.35454	20.8376	3.27993	0.52008				0.0707155	2.83329
	201.078	201.258	62.93	7.33542	21.6511	3.38207	0.51336				0.0699837	2.95158
	201.079	201.259	62.931	7.98819	19.2992	2.85071	0.4605				0.0576476	2.41597
		201.26	62.932	7.4498	19.165	3.27929	0.45951				0.0616808	2.57254
	201.08	201.26	62.933	6.91142	19.0307	3.70786	0.45852				0.0663424	2.75351
	201.081	201.261	62.934	4.38104	13.7144	4.442	0.30882				0.0704901	3.1304
	201.082	201.262	62.935	8.19656	18.2129	3.13036	0.41082				0.050121	2.22202
	201.083	201.263	62.936	6.74338	19.0496	3.42836	0.4617				0.0684671	2.82493
	201.084	201.264	62.937	7.32664	19.3593	6.875	0.48672				0.0664316	2.64232
	201.086	201.266	62.938	8.20747	22.4998	4.85936	0.56634				0.069003	2.74138
	201.087	201.267	62.939	8.62618	23.9467	3.69386	0.58158				0.0674203	2.77605
	201.088	201.268	62.94	8.06882	20.779	4.01271	0.50052				0.0620314	2.57522
	201.089	201.269	62.941	8.14283	21.8372	5.05486	0.52566				0.064555	2.68177
	201.09	201.27	62.942	8.15972	20.4457	4.99707	0.5037				0.0617301	2.50569
	201.091	201.271	62.943	8.31129	22.1062	4.9865	0.52554				0.0632321	2.65978
		201.272	62.944	8.40079	21.6059	4.94207	0.50418				0.0600158	2.5719
	201.092	201.272	62.945	8.49028	21.1057	4.89764	0.48282				0.0568674	2.48587
	201.093	201.273	62.946	7.10894	17.4916	2.28736	0.3291				0.0462938	2.4605
	201.094	201.274	62.947	9.29451	25.436	2.28636	0.50028				0.0538253	2.73667
	201.095	201.275	62.948	8.77008	27.0152	2.92464	0.59406				0.0677372	3.08039
	201.097	201.277	62.949	9.14183	25.1686	3.06421	0.54144				0.0592267	2.75313
	201.098	201.278	62.95	7.09862	24.3367	2.83764	0.55902				0.0787505	3.42837
	201.099	201.279	62.951	8.21954	24.3729	5.25857	0.55548				0.0675804	2.96524
	201.1	201.28	62.952	7.3116	18.83	6.59064	0.46656				0.0638109	2.57535
	201.101	201.281	62.953	7.90078	20.6304	6.34514	0.5154				0.065234	2.61118
	201.102	201.282	62.954	7.78881	22.9285	4.57429	0.56232				0.0721959	2.94377
	201.103	201.283	62.955	9.01546	25.8361	2.5365	0.58542				0.0649351	2.86575
		201.284	62.956	8.98086	24.9038	3.25846	0.60018				0.0668288	2.77299
	201.104	201.284	62.957	8.94626	23.9716	3.98043	0.61494				0.0687371	2.67951
	201.105	201.285	62.958	8.34146	24.8238	3.37186	0.62028				0.074361	2.97595
	201.106	201.286	62.959	7.81338	23.5348	3.03479	0.54228				0.0694041	3.01212
	201.107	201.287	62.96	8.72751	24.7427	3.60514	0.59832				0.0685556	2.83502
	201.109	201.289	62.961	8.20276	24.7859	4.00879	0.60012				0.0731608	3.02166
	201.11	201.29	62.962	8.46874	23.852	4.471	0.56178				0.0663358	2.81648
	201.111	201.291	62.963	8.61401	23.0646	5.56886	0.5757				0.066833	2.67757
	201.112	201.292	62.964	8.50881	22.3721	5.20693	0.55836				0.0656214	2.62929
	201.113	201.293	62.965	7.58885	20.8312	5.8255	0.52884				0.0696864	2.74497
	201.114	201.294	62.966	8.5905	23.0144	5.02129	0.57366				0.0667784	2.67905
		201.295	62.967	7.50748	21.7241	5.34661	0.54462				0.0725436	2.89366
	201.115	201.295	62.968	6.42446	20.4338	5.67193	0.51558				0.0802526	3.18063
	201.116	201.296	62.969	8.67865	22.9692	6.15614	0.58494				0.0673999	2.64664
	201.117	201.297	62.97	9.66097	22.6917	5.55786	0.56736				0.058727	2.3488
	201.118	201.298	62.971	7.06664	19.6444	6.28007	0.5115				0.0723823	2.77988
	201.119	201.299	62.972	7.51151	21.5564	7.231	0.52548				0.0699567	2.86978
	201.121	201.301	62.973	6.49451	20.6239	6.70429	0.50472				0.0777149	3.17559
	201.122	201.302	62.974	9.13775	21.3567	7.21621	0.5505				0.0602446	2.3372
	201.123	201.303	62.975	8.51008	21.6553	6.6315	0.53052				0.0623402	2.54467
	201.124	201.304	62.976	8.00301	20.9741	7.70071	0.51636				0.0645207	2.62078
	201.125	201.305	62.977	8.35089	21.2356	8.14879	0.52068				0.0623503	2.54292
	201.126	201.306	62.978	9.17841	20.9999	8.89936	0.49554				0.0539897	2.28797
		201.307	62.979	8.36439	21.4695	8.29996	0.49896				0.0596529	2.56677
	201.127	201.307	62.98	7.55036	21.939	7.70057	0.50238				0.0665372	2.90569
	201.128	201.308	62.981	8.56832	20.7367	8.26379	0.4938				0.0576309	2.42016
	201.129	201.309	62.982	7.53951	19.2393	8.59986	0.49266				0.0653438	2.5518
	201.13	201.31	62.983	8.00566	21.4015	6.9115	0.53148				0.066388	2.67329
	201.132	201.312	62.984	8.48202	23.2333	5.38386	0.56472				0.0665785	2.73913
	201.133	201.313	62.985	8.3259	22.2413	5.86793	0.5367				0.0644615	2.67134
	201.134	201.314	62.986	8.61755	23.7588	5.2865	0.57594				0.0668334	2.75703
	201.135	201.315	62.987	8.08343	23.1376	5.06607	0.59892				0.0740923	2.86235
	201.136	201.316	62.988	7.10756	21.3075	5.14457	0.52218				0.0734682	2.99787
	201.137	201.317	62.989	7.93387	21.5679	6.29271	0.55278				0.0696734	2.71846
		201.317	62.99	8.45299	22.3576	5.96604	0.5643				0.0667575	2.64494
	201.138	201.318	62.991	8.9721	23.1473	5.63936	0.57582				0.064179	2.57992
	201.139	201.319	62.992	8.38376	22.3621	5.09743	0.55062				0.0656769	2.66731
	201.14	201.32	62.993	7.55735	21.8682	4.76336	0.52488				0.0694529	2.89363
	201.141	201.321	62.994	8.75674	23.2957	5.29357	0.56778				0.0648392	2.66031
	201.142	201.322	62.995	8.41828	22.9696	5.28564	0.56166				0.0667191	2.72853
	201.144	201.324	62.996	8.18672	24.1773	4.90636	0.55242				0.0674776	2.95323
	201.145	201.325	62.997	8.40394	23.2233	5.38779	0.58308				0.0693818	2.76338
	201.146	201.326	62.998	7.38572	22.4	5.2905	0.54804				0.0742027	3.03289
	201.147	201.327	62.999	8.79686	22.3892	6.09221	0.56586				0.0643252	2.54513
	201.148	201.328	63	8.15464	22.2168	6.022	0.5757				0.0705979	2.72444
	201.149	201.329	63.001	8.07168	22.317	5.25064	0.52734				0.0653322	2.76486
		201.329	63.002	7.7413	21.5069	5.60771	0.53169				0.0686823	2.77821
	201.15	201.33	63.003	7.41092	20.6968	5.96479	0.53604				0.0723311	2.79275
	201.151	201.331	63.004	8.19222	21.7854	6.21857	0.53748				0.0656086	2.65927
	201.152	201.332	63.005	6.68409	20.522	5.07643	0.51096				0.0764442	3.07028
	201.153	201.333	63.006	6.70998	17.2388	4.81793	0.42312				0.0630583	2.56912
	201.154	201.334	63.007	8.28217	20.2825	5.49307	0.53034				0.0640339	2.44894
	201.156	201.336	63.008	7.5267	19.5072	5.77864	0.50802				0.0674957	2.59174
	201.157	201.337	63.009	8.34713	22.3621	5.64236	0.56982				0.0682654	2.67901
	201.158	201.338	63.01	8.37143	19.9173	5.90429	0.53262				0.0636235	2.3792
	201.159	201.339	63.011	7.22314	20.7266	5.36293	0.50856				0.0704071	2.86947
	201.16	201.34	63.012	6.41054	20.6498	5.185	0.51828				0.0808481	3.22123
	201.161	201.341	63.013	9.1638	22.8284	5.18871	0.5643				0.0615793	2.49115
		201.341	63.014	8.67277	21.958	5.50725	0.55338				0.0638066	2.53184
	201.162	201.342	63.015	8.18174	21.0877	5.82579	0.54246				0.0663013	2.57741
	201.163	201.343	63.016	7.87161	21.8843	5.11414	0.5649				0.0717642	2.78016
	201.164	201.344	63.017	6.80257	18.5301	7.06586	0.45426				0.0667777	2.72398
	201.165	201.345	63.018	8.60119	22.7619	5.50757	0.55008				0.0639539	2.64637
	201.167	201.347	63.019	8.34866	24.0544	4.51064	0.56922				0.068181	2.88122
	201.168	201.348	63.02	8.55106	22.9025	5.37	0.57552				0.0673039	2.67832
	201.169	201.349	63.021	7.35761	20.7141	5.38564	0.5331				0.0724556	2.81533
	201.17	201.35	63.022	7.01767	22.4744	4.58314	0.5583				0.0795563	3.20254
	201.171	201.351	63.023	8.64037	21.6632	4.38243	0.5475				0.0633653	2.5072
	201.172	201.352	63.024	7.28254	21.8328	4.52136	0.53868				0.0739687	2.99796
		201.353	63.025	7.46942	21.1999	4.75989	0.51957				0.0695596	2.83822
	201.173	201.353	63.026	7.6563	20.5669	4.99843	0.50046				0.0653658	2.68628
	201.174	201.354	63.027	7.69934	21.8991	4.58471	0.54264				0.0704788	2.84428
	201.175	201.355	63.028	7.37735	23.805	3.8285	0.58842				0.0797603	3.22677
	201.176	201.356	63.029	8.03859	23.8836	2.59014	0.57516				0.0715499	2.97112
	201.177	201.357	63.03	9.08243	22.0254	3.69429	0.54852				0.0603935	2.42506
	201.179	201.359	63.031	7.79755	22.2773	2.96836	0.55944				0.0717456	2.85696
	201.18	201.36	63.032	6.33457	19.6851	2.83757	0.51348				0.08106	3.10757
	201.181	201.361	63.033	6.43436	19.4547	2.074	0.45372				0.0705151	3.02356
	201.182	201.362	63.034	8.47932	24.1666	2.55257	0.5331				0.0628706	2.85006
	201.183	201.363	63.035	7.54862	22.1599	3.6195	0.54984				0.0728398	2.93563
	201.184	201.364	63.036	8.39425	23.4984	4.87907	0.56604				0.0674319	2.79934
		201.365	63.037	8.12451	23.5172	4.63514	0.56445				0.0694749	2.8946
	201.185	201.365	63.038	7.85478	23.5361	4.39121	0.56286				0.0716583	2.9964
	201.186	201.366	63.039	7.25453	21.9235	2.37857	0.48234				0.0664881	3.02205
	201.187	201.367	63.04	8.02763	23.2562	2.63821	0.53316				0.0664156	2.89702
	201.188	201.368	63.041	5.71976	19.9419	3.11521	0.46164				0.0807096	3.48649
	201.19	201.37	63.042	8.4825	24.7422	1.51371	0.55788				0.0657683	2.91686
	201.191	201.371	63.043	8.05352	22.7643	2.59543	0.54954				0.068236	2.82663
	201.192	201.372	63.044	7.96214	21.0029	4.07157	0.53718				0.0674668	2.63784
	201.193	201.373	63.045	7.32362	20.2377	2.91193	0.49092				0.0670324	2.76335
	201.194	201.374	63.046	8.00598	20.9923	2.64636	0.51414				0.0642195	2.62207
	201.195	201.375	63.047	7.95325	18.4616	3.37386	0.47544				0.0597794	2.32126
	201.196	201.376	63.048	5.84889	13.3122	3.91921	0.37632				0.0643404	2.27603
		201.377	63.049	6.17125	14.0223	4.356	0.40071				0.0649318	2.27219
	201.197	201.377	63.05	6.49361	14.7323	4.79279	0.4251				0.0654644	2.26874
	201.198	201.378	63.051	7.16532	14.9148	4.88943	0.4473				0.0624257	2.08152
	201.199	201.379	63.052	6.19629	11.1099	4.56386	0.3852				0.0621662	1.793
	201.2	201.38	63.053	5.24414	10.3272	4.3305	0.31872				0.0607764	1.96928
	201.202	201.382	63.054	5.68583	9.71409	2.90564	0.28998				0.0510005	1.70847
	201.203	201.383	63.055	6.44151	8.39379	2.97964	0.24306				0.0377334	1.30308
	201.204	201.384	63.056	6.19073	9.17443	3.51429	0.24522				0.0396108	1.48196
	201.205	201.385	63.057	5.13037	7.91499	3.07807	0.225				0.0438565	1.54277
	201.206	201.386	63.058	6.17305	6.23975	3.24329	0.17322				0.0280607	1.01081
	201.207	201.387	63.059	5.41403	4.29646	1.65893	0.1386				0.0256002	0.793579
		201.387	63.06	6.10065	7.34482	2.30954	0.25314				0.0414939	1.20394
	201.208	201.388	63.061	6.78727	10.3932	2.96014	0.36768				0.054172	1.53128
	201.209	201.389	63.062	6.24833	15.0102	2.62921	0.49788				0.0796821	2.40228
	201.21	201.39	63.063	7.48408	18.8092	3.228	0.55386				0.0740051	2.51323
	201.211	201.391	63.064	7.71686	19.7168	3.94114	0.50628				0.065607	2.55503
	201.212	201.392	63.065	7.4808	19.1716	5.15121	0.52074				0.0696102	2.56277
	201.214	201.394	63.066	7.00025	20.0754	4.06493	0.50376				0.0719631	2.86781
	201.215	201.395	63.067	6.37062	16.8881	4.1885	0.45114				0.0708157	2.65093
	201.216	201.396	63.068	8.03038	21.007	4.63114	0.55356				0.0689332	2.61595
	201.217	201.397	63.069	6.92206	21.8615	3.97129	0.53826				0.0777601	3.15823
	201.218	201.398	63.07	7.76393	20.7785	4.9405	0.52488				0.0676049	2.67628
	201.219	201.399	63.071	7.39234	19.6338	5.5075	0.48582				0.0657194	2.65597
		201.399	63.072	6.68234	19.6935	4.40236	0.47268				0.0707357	2.9471
	201.22	201.4	63.073	5.97235	19.7532	3.29721	0.45954				0.0769446	3.30744
	201.221	201.401	63.074	7.69066	20.3334	3.32736	0.50076				0.0651128	2.64391
	201.222	201.402	63.075	5.78292	18.5619	3.78921	0.44832				0.0775248	3.20977
	201.223	201.403	63.076	5.55904	15.6108	3.2	0.36936				0.0664432	2.80819
	201.225	201.405	63.077	6.55285	19.4973	3.66657	0.45786				0.0698719	2.97539
	201.226	201.406	63.078	8.09656	20.709	3.9025	0.50388				0.0622338	2.55776
	201.227	201.407	63.079	7.08909	22.6461	4.46793	0.50892				0.0717892	3.1945
	201.228	201.408	63.08	7.79204	22.5418	3.93557	0.50352				0.0646198	2.89292
	201.229	201.409	63.081	9.07184	23.0177	3.84693	0.56238				0.0619918	2.53727
	201.23	201.41	63.082	8.78749	22.8044	3.334	0.51828				0.0589793	2.5951
	201.231	201.411	63.083	7.99115	20.5338	2.79129	0.51258				0.0641434	2.56957
		201.411	63.084	7.89263	21.2817	3.35682	0.51237				0.0649175	2.6964
	201.232	201.412	63.085	7.79411	22.0296	3.92236	0.51216				0.0657112	2.82644
	201.233	201.413	63.086	7.83238	24.1939	3.4085	0.53622				0.0684619	3.08896
	201.234	201.414	63.087	8.00434	20.8916	3.73964	0.50406				0.0629734	2.61004
	201.235	201.415	63.088	8.08502	22.0583	3.575	0.50952				0.0630203	2.72829
	201.237	201.417	63.089	7.08469	19.8333	2.64957	0.44946				0.063441	2.79946
	201.238	201.418	63.09	6.86779	18.9494	3.52971	0.45348				0.0660299	2.75916
	201.239	201.419	63.091	7.18534	24.0004	4.49271	0.57168				0.079562	3.3402
	201.24	201.42	63.092	7.5105	22.3904	3.75521	0.51906				0.0691112	2.98122
	201.241	201.421	63.093	8.58775	24.4675	3.14243	0.55002				0.0640471	2.84911
	201.242	201.422	63.094	7.99454	21.8793	3.43057	0.5043				0.0630805	2.73678
		201.423	63.095	8.1337	22.1743	3.65136	0.50892				0.0625693	2.72623
	201.243	201.423	63.096	8.27285	22.4693	3.87214	0.51354				0.0620753	2.71602
	201.244	201.424	63.097	7.71745	21.1502	3.14464	0.47712				0.0618236	2.74057
	201.245	201.425	63.098	7.20752	21.9285	2.54821	0.50556				0.0701434	3.04245
	201.246	201.426	63.099	7.69129	22.8535	2.05036	0.53694				0.0698114	2.97134
	201.247	201.427	63.1	8.93165	25.031	2.22414	0.62028				0.0694474	2.80251
	201.249	201.429	63.101	8.31325	25.0828	2.14736	0.57756				0.0694747	3.01721
	201.25	201.43	63.102	8.33464	23.589	2.62164	0.54444				0.0653226	2.83023
	201.251	201.431	63.103	8.41458	25.207	3.28507	0.55728				0.0662279	2.99564
	201.252	201.432	63.104	8.66086	23.7251	2.996	0.54984				0.0634856	2.73935
	201.253	201.433	63.105	7.27465	20.2355	2.50936	0.40998				0.0563574	2.78164
	201.254	201.434	63.106	9.66621	25.1166	2.60607	0.57324				0.0593035	2.59839
		201.435	63.107	9.19226	25.3165	2.74568	0.58197				0.0633109	2.75412
	201.255	201.435	63.108	8.7183	25.5165	2.88529	0.5907				0.067754	2.92678
	201.256	201.436	63.109	7.51479	23.5456	2.4725	0.52638				0.0700459	3.13323
	201.257	201.437	63.11	8.91233	23.7001	2.59471	0.56304				0.0631754	2.65925
	201.258	201.438	63.111	6.75492	17.0411	2.38293	0.42042				0.062239	2.52277
	201.26	201.44	63.112	9.09244	20.4569	3.21243	0.49038				0.0539327	2.24988
	201.261	201.441	63.113	7.70972	21.8826	3.1075	0.52044				0.0675044	2.83831
	201.262	201.442	63.114	5.78647	17.6112	2.66271	0.43206				0.0746673	3.04351
	201.263	201.443	63.115	6.26569	16.4687	2.2145	0.4134				0.0659783	2.62839
	201.264	201.444	63.116	6.70754	17.1156	2.29236	0.41724				0.0622046	2.5517
	201.265	201.445	63.117	6.2037	17.263	2.92814	0.44166				0.071193	2.78269
	201.266	201.446	63.118	8.58034	20.3442	3.4935	0.4707				0.054858	2.37103
		201.447	63.119	8.67057	21.9725	3.26536	0.51492				0.0593871	2.53414
	201.267	201.447	63.12	8.76081	23.6007	3.03721	0.55914				0.0638229	2.6939
	201.268	201.448	63.121	6.85551	19.8492	2.99079	0.41934				0.0611683	2.89536
	201.269	201.449	63.122	8.65874	24.1717	3.157	0.56004				0.0646791	2.7916
	201.27	201.45	63.123	7.13414	19.9399	3.06657	0.46326				0.0649356	2.79499
	201.272	201.452	63.124	7.8453	21.805	2.72893	0.47958				0.0611296	2.77937
	201.273	201.453	63.125	7.88501	22.8522	2.86836	0.54114				0.068629	2.89819
	201.274	201.454	63.126	8.17909	22.0299	2.54207	0.49218				0.0601754	2.69344
	201.275	201.455	63.127	6.99776	20.4801	2.10521	0.42846				0.0612281	2.92667
	201.276	201.456	63.128	9.20086	25.5361	2.646	0.57444				0.0624333	2.77541
	201.277	201.457	63.129	9.27143	24.737	2.89893	0.56436				0.0608709	2.66809
		201.457	63.13	8.71123	23.3813	2.8925	0.53394				0.0612933	2.68404
	201.278	201.458	63.131	8.15104	22.0256	2.88607	0.50352				0.0617737	2.70218
	201.279	201.459	63.132	8.53957	23.9937	2.75271	0.52842				0.061879	2.80971
	201.28	201.46	63.133	9.14315	22.9606	3.07686	0.51432				0.0562519	2.51123
	201.281	201.461	63.134	8.55948	21.5439	3.97629	0.46056				0.053807	2.51697
	201.282	201.462	63.135	7.19121	20.6983	1.74257	0.47358				0.0658554	2.87828
	201.284	201.464	63.136	7.02911	20.756	1.331	0.48426				0.0688935	2.95286
	201.285	201.465	63.137	5.93539	18.6995	1.2105	0.42954				0.0723692	3.15051
	201.286	201.466	63.138	7.24886	21.7234	1.55614	0.5037				0.0694867	2.9968
	201.287	201.467	63.139	7.02318	19.992	2.004	0.4743				0.0675335	2.84658
	201.288	201.468	63.14	8.70083	24.9693	1.30907	0.55944				0.0642973	2.86976
	201.289	201.469	63.141	7.60309	21.958	1.16371	0.47862				0.0629507	2.88803
		201.469	63.142	7.44337	20.9214	1.16057	0.4545				0.061061	2.81074
	201.29	201.47	63.143	7.28365	19.8848	1.15743	0.43038				0.0590885	2.73006
	201.291	201.471	63.144	8.35406	22.5282	1.71821	0.50766				0.060768	2.69668
	201.292	201.472	63.145	8.17719	22.8948	1.51114	0.4872				0.0595804	2.79984
	201.293	201.473	63.146	7.61755	22.3958	2.11893	0.49044				0.0643829	2.94003
	201.295	201.475	63.147	8.42644	25.7266	1.45143	0.56736				0.067331	3.05308
	201.296	201.476	63.148	7.452	21.2307	1.5975	0.50172				0.0673269	2.849
	201.297	201.477	63.149	7.03345	20.6496	0.868786	0.46692				0.0663857	2.93592
	201.298	201.478	63.15	8.22944	23.6213	0.689857	0.52986				0.0643859	2.87034
	201.299	201.479	63.151	8.25019	23.8373	0.626	0.53802				0.065213	2.8893
	201.3	201.48	63.152	8.07978	24.0089	0.658571	0.5187				0.0641973	2.97148
	201.301	201.481	63.153	7.12784	20.8278	0.9595	0.49062				0.0688315	2.92203
		201.481	63.154	5.87578	18.4801	1.17125	0.46026				0.0783317	3.14513
	201.302	201.482	63.155	4.62372	16.1324	1.383	0.4299				0.092977	3.48906
	201.303	201.483	63.156	7.22896	20.0085	2.16764	0.49584				0.0685908	2.76782
	201.304	201.484	63.157	6.99464	19.748	2.108	0.4902				0.0700822	2.82331
	201.305	201.485	63.158	7.51008	22.8739	2.12264	0.52716				0.0701937	3.04577
	201.307	201.487	63.159	8.56895	22.4689	3.34943	0.49476				0.0577387	2.62213
	201.308	201.488	63.16	8.65689	27.4552	2.79386	0.61764				0.0713467	3.17149
	201.309	201.489	63.161	8.87045	29.1151	2.16407	0.69906				0.0788077	3.28226
	201.31	201.49	63.162	7.74836	25.843	2.95379	0.58884				0.0759954	3.33529
	201.311	201.491	63.163	8.23659	24.8613	1.72829	0.53988				0.0655466	3.0184
	201.312	201.492	63.164	9.27736	26.3243	2.09779	0.57504				0.0619832	2.83748
		201.493	63.165	8.99052	25.6883	1.91971	0.5379				0.0598297	2.85726
	201.313	201.493	63.166	8.70369	25.0523	1.74164	0.50076				0.0575342	2.87835
	201.314	201.494	63.167	7.96399	22.9692	4.50914	0.49428				0.0620643	2.88413
	201.315	201.495	63.168	9.52428	26.2554	2.51357	0.54882				0.0576233	2.75668
	201.316	201.496	63.169	7.84064	25.1571	1.44379	0.54648				0.0696984	3.20855
	201.317	201.497	63.17	9.85638	25.9593	1.18921	0.56208				0.057027	2.63376
	201.319	201.499	63.171	8.08009	23.1705	1.19093	0.4962				0.0614102	2.8676
	201.32	201.5	63.172	8.25438	22.7092	1.351	0.50592				0.0612911	2.75117
	201.321	201.501	63.173	7.49409	24.9666	1.78086	0.55128				0.073562	3.3315
	201.322	201.502	63.174	8.9505	23.5835	3.04193	0.54408				0.0607877	2.63488
	201.323	201.503	63.175	8.32696	23.3784	3.42814	0.54264				0.0651666	2.80755
	201.324	201.504	63.176	9.06279	21.1948	8.575	0.54462				0.0600941	2.33866
		201.505	63.177	8.27251	21.0546	8.55475	0.53433				0.064591	2.54513
	201.325	201.505	63.178	7.48223	20.9144	8.5345	0.52404				0.0700379	2.79521
	201.326	201.506	63.179	8.58791	23.8312	6.464	0.60216				0.0701172	2.77497
	201.327	201.507	63.18	7.48985	23.5604	2.79657	0.57162				0.0763193	3.14564
	201.328	201.508	63.181	8.10609	26.2775	2.94164	0.64362				0.0793996	3.2417
	201.33	201.51	63.182	9.17905	26.1765	2.89857	0.59862				0.0652159	2.85176
	201.331	201.511	63.183	9.26926	24.6841	3.30579	0.55944				0.0603543	2.66301
	201.332	201.512	63.184	8.28821	23.65	3.35357	0.53514				0.0645664	2.85345
	201.333	201.513	63.185	8.48382	25.1986	3.47464	0.5829				0.0687072	2.9702
	201.334	201.514	63.186	8.34131	23.3423	5.32714	0.54384				0.0651984	2.7984
	201.335	201.515	63.187	7.34135	23.4701	3.37971	0.55998				0.0762775	3.19697
	201.336	201.516	63.188	10.1626	25.6943	2.58043	0.60732				0.0597601	2.52831
		201.517	63.189	9.60454	25.9463	2.37896	0.60507				0.0629984	2.70146
	201.337	201.517	63.19	9.04643	26.1982	2.1775	0.60282				0.0666362	2.89598
	201.338	201.518	63.191	8.98412	26.2871	2.46593	0.55818				0.0621296	2.92595
	201.339	201.519	63.192	8.80555	28.8573	1.6905	0.62352				0.0708099	3.27717
	201.34	201.52	63.193	8.65869	28.3125	1.86471	0.62004				0.071609	3.26983
	201.342	201.522	63.194	10.2316	26.9673	1.81571	0.57288				0.0559911	2.63568
	201.343	201.523	63.195	9.17931	27.1999	1.99343	0.5871				0.063959	2.96317
	201.344	201.524	63.196	9.07036	27.4771	1.99921	0.58878				0.0649125	3.02932
	201.345	201.525	63.197	9.15401	26.8553	1.61707	0.59718				0.065237	2.93372
	201.346	201.526	63.198	9.65891	27.2016	1.49164	0.60378				0.0625102	2.81622
	201.347	201.527	63.199	9.33649	27.1646	1.478	0.59502				0.0637306	2.90951
		201.528	63.2	9.28268	27.4404	1.5105	0.59901				0.0645299	2.95609
	201.348	201.528	63.201	9.22886	27.7162	1.543	0.603				0.0653385	3.00321
	201.349	201.529	63.202	9.67532	27.0965	1.50757	0.5994				0.0619515	2.80058
	201.35	201.53	63.203	9.77601	27.5409	1.38107	0.6078				0.0621726	2.81719
	201.351	201.531	63.204	8.82566	27.3516	2.01686	0.58782				0.0666035	3.09909
	201.352	201.532	63.205	8.69072	28.3543	1.58907	0.62796				0.0722564	3.2626
	201.354	201.534	63.206	9.26566	28.2935	1.43621	0.62766				0.0677405	3.05359
	201.355	201.535	63.207	9.36048	27.7682	1.9135	0.59658				0.0637339	2.96653
	201.356	201.536	63.208	8.73111	28.693	1.208	0.63048				0.0722107	3.28629
	201.357	201.537	63.209	10.2126	27.3345	1.24171	0.56988				0.0558018	2.67655
	201.358	201.538	63.21	9.73901	26.7846	1.39964	0.62544				0.0642201	2.75024
	201.359	201.539	63.211	9.83435	25.611	1.57243	0.57012				0.0579723	2.60424
		201.54	63.212	9.34467	26.5502	1.6935	0.59079				0.0632221	2.84121
	201.36	201.54	63.213	8.85499	27.4894	1.81457	0.61146				0.0690526	3.10439
	201.361	201.541	63.214	8.73228	26.3884	2.88771	0.59316				0.0679273	3.02193
	201.362	201.542	63.215	8.24633	23.825	3.08136	0.51294				0.0622022	2.88917
	201.363	201.543	63.216	7.69262	21.6437	1.36579	0.49062				0.063778	2.81357
	201.365	201.545	63.217	6.81438	16.9665	1.01371	0.33894				0.049739	2.48981
	201.366	201.546	63.218	7.06675	18.3081	2.36921	0.42114				0.0595946	2.59074
	201.367	201.547	63.219	7.27338	24.8264	3.04543	0.5763				0.0792342	3.41332
	201.368	201.548	63.22	7.0443	21.5582	8.21236	0.47394				0.0672799	3.06037
	201.369	201.549	63.221	8.72566	27.1264	4.36929	0.5787				0.0663216	3.1088
	201.37	201.55	63.222	9.34311	27.0163	3.91243	0.558				0.0597231	2.89157
	201.371	201.551	63.223	8.87834	25.2331	4.36307	0.54042				0.0608695	2.8421
		201.552	63.224	8.95881	24.9824	4.66018	0.53808				0.0600615	2.78858
	201.372	201.552	63.225	9.03928	24.7316	4.95729	0.53574				0.059268	2.73601
	201.373	201.553	63.226	8.19858	23.8844	3.92036	0.47976				0.0585175	2.91324
	201.374	201.554	63.227	7.81142	25.537	4.78107	0.56388				0.0721866	3.26919
	201.375	201.555	63.228	8.68971	25.6995	5.50379	0.5757				0.0662508	2.95747
	201.377	201.557	63.229	9.54635	25.6015	4.7795	0.56292				0.058967	2.68181
	201.378	201.558	63.23	8.73074	25.6748	5.27436	0.55632				0.0637197	2.94073
	201.379	201.559	63.231	9.04209	23.9967	6.39186	0.52758				0.0583471	2.65388
	201.38	201.56	63.232	7.93244	24.7219	6.20136	0.57564				0.0725678	3.11656
	201.381	201.561	63.233	8.12578	22.4146	9.70629	0.51486				0.0633613	2.75846
	201.382	201.562	63.234	8.37461	24.3489	7.19407	0.54318				0.0648604	2.90747
		201.562	63.235	7.74956	21.6023	9.86993	0.50331				0.0649469	2.78756
	201.383	201.563	63.236	7.12451	18.8558	12.5458	0.46344				0.0650487	2.64661
	201.384	201.564	63.237	7.47296	19.3944	14.3071	0.45744				0.0612127	2.59527
	201.385	201.565	63.238	7.52363	21.8923	9.96714	0.49626				0.0659602	2.90981
	201.386	201.566	63.239	8.5446	22.8249	7.46829	0.54432				0.0637034	2.67127
	201.387	201.567	63.24	7.85022	20.935	9.92964	0.49398				0.0629256	2.66681
	201.389	201.569	63.241	6.11105	22.2692	7.287	0.50568				0.0827484	3.64409
	201.39	201.57	63.242	8.84059	22.8526	5.43493	0.53046				0.0600028	2.58496
	201.391	201.571	63.243	7.09295	23.2267	5.36307	0.52404				0.0738818	3.27462
	201.392	201.572	63.244	8.72624	23.8407	7.513	0.56682				0.0649558	2.73207
	201.393	201.573	63.245	6.99671	22.5986	8.4885	0.52584				0.0751554	3.22989
	201.394	201.574	63.246	7.91508	23.4026	7.39036	0.52644				0.066511	2.95671
		201.575	63.247	8.32434	23.7973	7.13104	0.52887				0.063533	2.85876
	201.395	201.575	63.248	8.7336	24.192	6.87171	0.5313				0.060834	2.76999
	201.396	201.576	63.249	8.24358	24.4511	7.383	0.57174				0.0693558	2.96608
	201.397	201.577	63.25	8.58574	22.9796	7.19893	0.55866				0.0650684	2.67649
	201.398	201.578	63.251	8.53931	22.9016	8.15586	0.54516				0.0638413	2.6819
	201.4	201.58	63.252	8.72344	23.6308	9.26786	0.53244				0.0610356	2.70889
	201.401	201.581	63.253	8.10826	23.3899	7.53814	0.52422				0.0646526	2.88471
	201.402	201.582	63.254	8.847	24.2403	7.1815	0.53592				0.0605765	2.73994
	201.403	201.583	63.255	7.80099	22.582	6.89529	0.49908				0.0639765	2.89476
	201.404	201.584	63.256	7.26385	23.1169	8.542	0.49902				0.0686991	3.18246
	201.405	201.585	63.257	8.92207	23.22	9.39743	0.51396				0.0576055	2.60254
		201.586	63.258	8.21086	22.6184	10.0712	0.49014				0.0596941	2.75469
	201.406	201.586	63.259	7.49965	22.0167	10.7449	0.46632				0.0621789	2.9357
	201.407	201.587	63.26	8.45132	22.5249	9.52379	0.50184				0.0593801	2.66526
	201.408	201.588	63.261	8.37852	23.7327	9.63393	0.54264				0.0647656	2.83256
	201.409	201.589	63.262	9.1161	23.1385	9.81707	0.53436				0.0586172	2.53821
	201.41	201.59	63.263	8.19212	24.559	8.92707	0.55476				0.0677188	2.99789
	201.412	201.592	63.264	8.57986	25.4362	8.78443	0.54768				0.0638332	2.96464
	201.413	201.593	63.265	8.85192	23.9852	10.6289	0.54606				0.0616883	2.70961
	201.414	201.594	63.266	8.75525	22.7555	11.6164	0.49866				0.0569555	2.59907
	201.415	201.595	63.267	7.36904	19.0228	15.6881	0.40206				0.0545607	2.58145
	201.416	201.596	63.268	5.94069	12.0753	24.0092	0.23394				0.0393793	2.03265
	201.417	201.597	63.269	4.59741	6.09341	25.9652	0.10788				0.0234654	1.3254
		201.598	63.27	4.61361	5.66963	26.6676	0.09693				0.0210096	1.22889
	201.418	201.598	63.271	4.62981	5.24585	27.37	0.08598				0.0185709	1.13306
	201.421	201.601	63.272	3.69969	4.69037	27.4771	0.0597				0.0161365	1.26778
	201.44	201.62	63.273	6.14621	17.015	5.60914	0.4956				0.0806351	2.76838
	201.441	201.621	63.274	5.50159	18.1974	5.41779	0.4971				0.0903556	3.30766
	201.442	201.622	63.275	6.90088	19.3662	5.65914	0.47568				0.0689303	2.80633
	201.443	201.623	63.276	7.81396	19.9255	6.87829	0.45024				0.05762	2.54998
	201.444	201.624	63.277	5.86016	18.8959	6.48293	0.48408				0.0826052	3.22447
	201.445	201.625	63.278	6.66588	18.3603	7.54129	0.50556				0.075843	2.75438
	201.446	201.626	63.279	7.75144	17.8518	7.58871	0.54666				0.0705237	2.30303
	201.447	201.627	63.28	6.38005	15.9245	7.51171	0.4875				0.0764101	2.49599
	201.448	201.628	63.281	6.63766	17.1329	7.44243	0.52494				0.0790851	2.58117
	201.449	201.629	63.282	6.62644	16.9666	7.93293	0.50904				0.0768196	2.56043
	201.45	201.63	63.283	6.10306	17.827	7.81879	0.51792				0.0848624	2.92099
	201.451	201.631	63.284	5.67344	17.6938	7.93293	0.47214				0.0832193	3.1187
	201.452	201.632	63.285	5.06149	15.7341	7.99143	0.4629				0.0914552	3.10859
	201.453	201.633	63.286	6.98702	16.8241	9.28571	0.49884				0.0713953	2.40791
	201.454	201.634	63.287	4.9869	13.9089	8.38407	0.42114				0.0844493	2.78909
	201.456	201.636	63.288	5.54765	15.4845	8.46707	0.45888				0.0827161	2.79117
	201.457	201.637	63.289	5.45315	14.7075	8.53036	0.45144				0.0827851	2.69707
	201.458	201.638	63.29	5.39386	14.1806	8.18979	0.43674				0.0809699	2.62902
	201.459	201.639	63.291	5.73194	14.3106	8.91121	0.4689				0.0818047	2.49664
	201.46	201.64	63.292	5.48365	14.087	8.51021	0.43902				0.0800599	2.56891
	201.461	201.641	63.293	5.18818	13.6686	8.62071	0.43698				0.084226	2.63456
	201.462	201.642	63.294	6.24616	14.8814	8.03929	0.44442				0.0711509	2.38249
	201.463	201.643	63.295	5.91533	13.8255	8.21557	0.45894				0.0775849	2.33723
		201.644	63.296	6.11071	14.4593	8.78543	0.459				0.075114	2.36622
	201.464	201.644	63.297	6.30609	15.0931	9.35529	0.45906				0.0727963	2.39341
	201.465	201.645	63.298	5.41366	15.9644	8.33879	0.42492				0.0784904	2.94891
	201.466	201.646	63.299	5.17818	14.6974	10.6698	0.41424				0.0799973	2.83833
	201.467	201.647	63.3	5.88436	14.2073	10.9518	0.37938				0.0644726	2.41442
	201.468	201.648	63.301	7.43379	16.8012	9.54971	0.48078				0.064675	2.26011
	201.469	201.649	63.302	7.56064	20.0755	6.5125	0.54294				0.0718114	2.65526
	201.47	201.65	63.303	7.48969	22.1618	5.5955	0.56622				0.0755999	2.95897
	201.471	201.651	63.304	7.94314	21.3082	4.51336	0.5742				0.0722888	2.68259
	201.472	201.652	63.305	7.70988	22.2745	3.14393	0.57048				0.0739934	2.88908
	201.473	201.653	63.306	5.75571	13.1182	0.664357	0.35508				0.0616918	2.27916
	201.474	201.654	63.307	6.74005	13.0709	0.696929	0.37542				0.0556999	1.93928
	201.475	201.655	63.308	5.32488	13.2452	0.6365	0.36186				0.0679565	2.48742
	201.476	201.656	63.309	5.40026	12.1393	0.653286	0.33888				0.0627525	2.2479
	201.477	201.657	63.31	5.61134	11.6492	0.64	0.3222				0.0574194	2.07601
	201.478	201.658	63.311	6.68875	11.6346	0.824929	0.31596				0.0472375	1.73943
	201.479	201.659	63.312	6.54554	11.8723	0.944714	0.2844				0.0434494	1.8138
	201.48	201.66	63.313	5.42753	12.6128	0.833643	0.3123				0.05754	2.32385
	201.481	201.661	63.314	5.56878	14.712	0.442786	0.3474				0.0623835	2.64187
	201.482	201.662	63.315	4.90426	13.9487	0.430214	0.2949				0.0601314	2.8442
	201.483	201.663	63.316	4.93676	15.36	0.498714	0.34182				0.0692397	3.11134
	201.484	201.664	63.317	6.97235	16.7237	0.793571	0.39744				0.0570023	2.39857
	201.486	201.666	63.318	5.73475	16.7058	0.985929	0.39822				0.0694399	2.91309
	201.487	201.667	63.319	5.38915	15.6338	0.958	0.37062				0.0687716	2.90099
	201.488	201.668	63.32	5.86392	16.2197	0.951286	0.34842				0.0594176	2.76602
	201.489	201.669	63.321	6.85715	17.5941	0.894357	0.37374				0.0545037	2.56581
	201.49	201.67	63.322	7.52141	18.5401	0.906357	0.42072				0.0559364	2.46497
	201.491	201.671	63.323	5.1021	14.5174	0.535214	0.28842				0.0565297	2.84538
	201.492	201.672	63.324	4.23784	14.7079	0.384357	0.31824				0.0750949	3.47062
	201.493	201.673	63.325	7.25199	16.2119	0.584	0.38286				0.0527938	2.23551
		201.673	63.326	6.05766	13.5402	0.527214	0.30003				0.049529	2.23521
	201.494	201.674	63.327	4.86334	10.8685	0.470429	0.2172				0.0446607	2.23478
	201.495	201.675	63.328	5.2038	14.6327	0.792143	0.33198				0.0637957	2.81193
	201.496	201.676	63.329	5.02984	15.6518	0.810571	0.36222				0.0720143	3.11179
	201.497	201.677	63.33	5.8005	15.6583	0.9065	0.35706				0.0615568	2.69948
	201.498	201.678	63.331	6.38201	15.2164	1.0735	0.37656				0.0590034	2.38426
	201.499	201.679	63.332	5.72395	15.8211	0.9255	0.39966				0.0698224	2.76401
	201.5	201.68	63.333	6.83714	16.918	0.910929	0.41262				0.0603498	2.47443
	201.501	201.681	63.334	6.13276	16.0246	0.761071	0.37302				0.0608242	2.61295
	201.502	201.682	63.335	6.41102	17.2373	0.944429	0.40164				0.0626484	2.68869
	201.503	201.683	63.336	6.57355	16.8604	0.875786	0.4098				0.0623408	2.56488
	201.504	201.684	63.337	6.13535	15.6392	0.565857	0.31482				0.0513125	2.54903
	201.505	201.685	63.338	6.20036	16.8592	0.687071	0.39414				0.0635672	2.71907
	201.506	201.686	63.339	8.03298	22.0366	0.986429	0.52656				0.0655498	2.74327
	201.507	201.687	63.34	7.00158	20.6519	1.15707	0.4878				0.06967	2.94961
	201.508	201.688	63.341	7.46592	22.2405	0.926143	0.4827				0.0646538	2.97893
	201.509	201.689	63.342	7.12805	20.7469	0.966929	0.47262				0.0663042	2.9106
	201.51	201.69	63.343	9.18111	27.853	0.968571	0.6306				0.0686845	3.03373
	201.511	201.691	63.344	10.6351	26.4829	0.942071	0.60576				0.0569586	2.49015
	201.518	201.698	63.345	4.97398	3.43107	29.1938	0.05496				0.0110495	0.689804
	201.528	201.708	63.346	4.53791	2.72188	28.4431	0.03984				0.00877938	0.59981
	201.529	201.709	63.347	3.98096	2.82814	28.3328	0.0279				0.00700835	0.710416
	201.544	201.724	63.348	4.27156	2.93286	28.2687	0.03492				0.008175	0.686602
	201.548	201.728	63.349	4.80515	2.48757	28.8659	0.04842				0.0100767	0.517687
	201.549	201.729	63.35	4.44018	2.96352	29.0774	0.0438				0.00986447	0.667433
	201.561	201.741	63.351	4.34584	3.37797	29.4971	0.05874				0.0135164	0.777288
	201.572	201.752	63.352	3.76417	2.65949	29.4274	0.04374				0.0116201	0.706527
	201.578	201.758	63.353	3.96434	3.18845	28.9294	0.03168				0.00799124	0.804283
	201.579	201.759	63.354	4.51678	2.69939	29.2659	0.03132				0.00693414	0.597635
	201.581	201.761	63.355	3.67158	2.73397	27.9459	0.0333				0.00906967	0.74463
	201.583	201.763	63.356	4.90934	2.4248	28.2352	0.02886				0.00587859	0.493916
		201.764	63.357	5.08773	3.85091	27.6079	0.05703				0.0112093	0.756902
	201.584	201.764	63.358	5.26611	5.27702	26.9806	0.0852				0.0161789	1.00207
	201.585	201.765	63.359	7.71761	10.8801	22.9181	0.2388				0.0309422	1.40977
	201.586	201.766	63.36	6.44315	14.0956	17.2844	0.3378				0.0524277	2.18769
	201.587	201.767	63.361	7.38222	19.8193	8.49779	0.46626				0.0631598	2.68474
	201.588	201.768	63.362	7.69299	23.1127	2.77271	0.54978				0.0714651	3.00439
	201.589	201.769	63.363	7.70776	22.4063	2.23921	0.5601				0.072667	2.90697
	201.59	201.77	63.364	8.4609	22.0983	2.09229	0.5655				0.0668369	2.61181
	201.591	201.771	63.365	7.60722	19.6136	2.18043	0.5166				0.0679091	2.57829
	201.592	201.772	63.366	7.9254	20.4714	2.18479	0.54684				0.0689984	2.58301
	201.593	201.773	63.367	7.2585	21.6984	1.9625	0.54978				0.0757429	2.98937
	201.594	201.774	63.368	7.82931	24.1164	2.57614	0.56484				0.0721443	3.08026
	201.595	201.775	63.369	7.36438	20.9688	3.34621	0.54426				0.0739044	2.84732
	201.596	201.776	63.37	6.66275	21.3854	3.41571	0.5481				0.0822633	3.20969
	201.597	201.777	63.371	7.68923	21.4695	3.57086	0.55782				0.0725456	2.79215
	201.598	201.778	63.372	7.07479	19.057	3.16529	0.50586				0.0715017	2.69365
	201.599	201.779	63.373	7.13869	20.6524	2.11407	0.54252				0.0759971	2.89302
	201.6	201.78	63.374	6.28237	19.2437	2.61207	0.49764				0.0792121	3.06313
	201.601	201.781	63.375	7.93885	20.8803	2.97257	0.54618				0.0687984	2.63014
	201.602	201.782	63.376	7.34839	19.9073	2.95207	0.5265				0.0716483	2.70907
	201.603	201.783	63.377	6.41801	19.3899	3.12679	0.50304				0.0783795	3.02117
	201.604	201.784	63.378	5.72305	16.9594	3.44871	0.47352				0.0827391	2.96335
	201.605	201.785	63.379	6.59801	19.5706	3.12064	0.51642				0.0782691	2.96613
	201.607	201.787	63.38	6.8067	20.2807	2.7555	0.52122				0.0765746	2.97952
	201.608	201.788	63.381	6.03222	15.2247	1.22493	0.33504				0.0555417	2.5239
	201.609	201.789	63.382	5.55152	17.4092	1.50821	0.43092				0.077622	3.13594
	201.61	201.79	63.383	8.19979	23.9452	1.80686	0.6051				0.0737945	2.92022
	201.611	201.791	63.384	6.58991	17.6902	1.411	0.45096				0.0684319	2.68444
	201.612	201.792	63.385	7.89644	21.9595	1.57543	0.5592				0.0708167	2.78094
	201.613	201.793	63.386	6.6267	22.4118	0.953643	0.5454				0.0823034	3.38204
		201.793	63.387	6.69343	20.4909	0.866929	0.522				0.0779869	3.06135
	201.614	201.794	63.388	6.76016	18.5701	0.780214	0.4986				0.0737556	2.74698
	201.615	201.795	63.389	6.98416	20.3548	1.00371	0.54006				0.0773264	2.91442
	201.616	201.796	63.39	6.84656	17.8949	1.12121	0.49956				0.0729651	2.61371
	201.617	201.797	63.391	6.22133	16.3835	0.872643	0.43872				0.0705187	2.63343
	201.618	201.798	63.392	6.81999	17.2698	0.952786	0.43056				0.0631321	2.53223
	201.619	201.799	63.393	7.10555	18.8401	1.12879	0.50628				0.0712513	2.65147
	201.62	201.8	63.394	4.85524	13.6423	0.737286	0.31752				0.0653974	2.80981
	201.621	201.801	63.395	6.01714	15.4889	0.780571	0.35592				0.0591511	2.57413
	201.622	201.802	63.396	6.47169	18.2568	1.0515	0.46686				0.0721388	2.82103
	201.623	201.803	63.397	7.00417	19.7908	1.2695	0.50592				0.0722313	2.82558
	201.624	201.804	63.398	7.41685	19.9548	1.51643	0.52128				0.0702832	2.69046
	201.625	201.805	63.399	8.45825	22.442	1.00657	0.52008				0.0614879	2.65327
	201.626	201.806	63.4	5.61648	18.0193	0.688643	0.42744				0.0761047	3.20829
	201.627	201.807	63.401	6.15356	13.7918	0.7355	0.3624				0.0588927	2.24127
	201.628	201.808	63.402	6.32462	13.6537	0.638357	0.34788				0.0550041	2.15882
	201.629	201.809	63.403	6.75799	12.2689	0.479857	0.30606				0.0452886	1.81546
	201.63	201.81	63.404	6.17813	13.594	0.535929	0.34986				0.0566288	2.20035
	201.631	201.811	63.405	5.67471	11.4868	0.334571	0.30774				0.0542301	2.0242
	201.632	201.812	63.406	5.2434	11.7054	0.334214	0.3273				0.0624213	2.23241
	201.633	201.813	63.407	5.85773	16.0685	0.596214	0.3963				0.0676542	2.74313
	201.634	201.814	63.408	6.61728	12.1989	0.297071	0.30498				0.0460884	1.8435
	201.635	201.815	63.409	5.38708	11.1568	0.315286	0.28662				0.0532051	2.07103
	201.637	201.817	63.41	5.2902	14.9104	0.433786	0.38418				0.0726211	2.8185
	201.638	201.818	63.411	5.80039	12.8241	0.460143	0.35052				0.0604304	2.21091
	201.639	201.819	63.412	4.4748	14.4274	0.310071	0.37008				0.0827031	3.22414
	201.64	201.82	63.413	6.47545	17.9316	0.447643	0.4461				0.068891	2.76917
	201.641	201.821	63.414	6.03254	20.6089	0.750143	0.48672				0.0806824	3.41629
	201.642	201.822	63.415	7.58388	19.4993	0.991643	0.46008				0.0606655	2.57116
	201.643	201.823	63.416	6.31032	18.242	1.08236	0.46932				0.0743734	2.89082
		201.824	63.417	6.86208	18.4349	1.10032	0.47808				0.0696699	2.68648
	201.644	201.824	63.418	7.41383	18.6277	1.11829	0.48684				0.0656665	2.51256
	201.645	201.825	63.419	5.5665	18.5877	0.924071	0.46572				0.0836648	3.3392
	201.646	201.826	63.42	5.84989	17.8372	0.8405	0.42846				0.0732424	3.04915
	201.647	201.827	63.421	7.25686	17.1274	0.832143	0.41928				0.0577771	2.36016
	201.648	201.828	63.422	6.86181	16.5264	1.17993	0.42144				0.0614182	2.40846
	201.649	201.829	63.423	6.13016	18.062	1.56929	0.44286				0.0722428	2.94641
	201.65	201.83	63.424	6.91391	16.9664	0.951	0.43578				0.0630295	2.45395
	201.651	201.831	63.425	5.80961	13.6405	0.804786	0.30594				0.0526611	2.34792
	201.652	201.832	63.426	6.14769	16.4051	1.37879	0.45432				0.0739009	2.66849
	201.653	201.833	63.427	5.54919	15.4452	1.34386	0.4068				0.073308	2.78332
	201.654	201.834	63.428	7.21429	19.2252	1.955	0.49044				0.0679817	2.66487
	201.655	201.835	63.429	6.18644	17.2963	1.711	0.4362				0.070509	2.79583
	201.656	201.836	63.43	5.60456	15.3896	1.56379	0.42438				0.0757204	2.74591
	201.657	201.837	63.431	6.35855	16.0121	1.70721	0.40506				0.0637032	2.5182
	201.658	201.838	63.432	6.35575	19.0514	1.74679	0.4911				0.0772687	2.99751
	201.659	201.839	63.433	6.02036	18.8269	2.00493	0.48246				0.080138	3.1272
	201.66	201.84	63.434	7.51616	20.7066	2.17993	0.50148				0.0667202	2.75494
	201.661	201.841	63.435	8.17708	22.83	2.20993	0.53298				0.0651797	2.79195
	201.662	201.842	63.436	7.4286	23.5025	2.15157	0.54618				0.0735239	3.16378
	201.663	201.843	63.437	7.79183	23.0273	1.7525	0.54306				0.0696961	2.95532
	201.664	201.844	63.438	8.55058	23.6696	1.96271	0.51528				0.0602626	2.76819
	201.665	201.845	63.439	8.07544	23.2194	1.94564	0.5244				0.0649377	2.87531
	201.666	201.846	63.44	6.87277	21.2333	2.82379	0.4926				0.0716742	3.08948
	201.668	201.848	63.441	8.60765	23.1122	2.55286	0.5337				0.062003	2.68508
	201.669	201.849	63.442	8.15686	22.5036	1.59243	0.50844				0.0623328	2.75886
	201.67	201.85	63.443	7.70612	23.6846	2.05714	0.51924				0.0673802	3.07348
	201.671	201.851	63.444	8.85685	23.4364	1.55757	0.528				0.0596149	2.64614
	201.672	201.852	63.445	7.67636	23.9419	1.9675	0.54648				0.0711899	3.11891
	201.673	201.853	63.446	9.3924	30.4836	0.5295	0.67848				0.0722371	3.24556
		201.853	63.447	9.50051	29.8244	0.493714	0.6675				0.0702594	3.13924
	201.674	201.854	63.448	9.60861	29.1652	0.457929	0.65652				0.0683262	3.03532
	201.675	201.855	63.449	9.57505	29.158	0.138429	0.54534				0.0569543	3.04521
	201.676	201.856	63.45	8.90021	27.8476	0.145	0.5556				0.0624255	3.12887
	201.677	201.857	63.451	9.16634	27.499	0.201786	0.64206				0.0700454	3
	201.678	201.858	63.452	9.82535	27.8098	0.424429	0.62766				0.0638817	2.83042
	201.679	201.859	63.453	9.77284	27.7754	0.321214	0.65922				0.0674543	2.8421
	201.68	201.86	63.454	9.48404	27.463	0.252857	0.61884				0.0652507	2.8957
	201.681	201.861	63.455	9.60914	28.3913	0.211714	0.62772				0.0653253	2.95462
	201.682	201.862	63.456	10.2976	28.7678	0.215357	0.6363				0.0617912	2.79364
	201.683	201.863	63.457	9.88782	29.2125	0.186929	0.62142				0.062847	2.95439
	201.684	201.864	63.458	9.34586	25.4122	0.74	0.58362				0.0624469	2.71909
	201.685	201.865	63.459	7.58028	22.1335	1.46943	0.54258				0.0715779	2.91988
	201.686	201.866	63.46	7.3629	20.4736	1.915	0.54012				0.073357	2.78064
	201.687	201.867	63.461	6.1983	19.065	2.63871	0.49248				0.079454	3.07584
	201.688	201.868	63.462	7.22705	19.0114	2.72493	0.4998				0.0691568	2.63059
	201.689	201.869	63.463	7.10603	18.4612	2.426	0.46716				0.0657414	2.59796
	201.69	201.87	63.464	6.50658	18.1595	2.57736	0.4884				0.0750625	2.79094
	201.691	201.871	63.465	7.19126	19.5582	3.58257	0.51642				0.0718121	2.71971
	201.692	201.872	63.466	7.76292	19.8127	3.83686	0.4998				0.064383	2.55222
	201.693	201.873	63.467	6.98178	18.59	4.47121	0.46362				0.0664043	2.66265
	201.694	201.874	63.468	7.33812	18.7662	3.81221	0.46698				0.0636375	2.55735
	201.695	201.875	63.469	7.02921	20.3025	3.87357	0.52086				0.0740993	2.8883
	201.696	201.876	63.47	7.02868	21.0237	3.28043	0.52308				0.0744208	2.99113
	201.698	201.878	63.471	8.45566	22.6069	3.41486	0.55434				0.0655585	2.67358
	201.699	201.879	63.472	8.01598	22.5398	3.37064	0.552				0.0688624	2.81185
	201.7	201.88	63.473	7.37741	21.2674	3.07657	0.5496				0.0744977	2.88277
	201.701	201.881	63.474	6.99385	23.067	2.48786	0.5487				0.0784547	3.29818
	201.702	201.882	63.475	8.33088	23.1617	2.43993	0.5205				0.0624784	2.78022
	201.703	201.883	63.476	8.50039	21.5448	2.4905	0.52362				0.0615995	2.53457
		201.884	63.477	7.38191	21.2537	2.45775	0.513				0.0694942	2.87916
	201.704	201.884	63.478	6.26342	20.9625	2.425	0.50238				0.0802086	3.34682
	201.705	201.885	63.479	7.79622	22.3797	1.57986	0.55884				0.0716809	2.87058
	201.706	201.886	63.48	6.31657	20.6558	2.05221	0.50826				0.0804645	3.2701
	201.707	201.887	63.481	7.83048	23.1591	2.55664	0.55956				0.0714593	2.95756
	201.708	201.888	63.482	8.09952	21.5402	2.69043	0.50238				0.0620259	2.65944
	201.709	201.889	63.483	9.00053	24.336	3.52707	0.5823				0.0646962	2.70384
	201.71	201.89	63.484	7.80782	22.5131	3.34329	0.51756				0.0662874	2.8834
	201.711	201.891	63.485	7.69399	21.4182	3.79943	0.52482				0.0682116	2.78376
	201.712	201.892	63.486	7.67509	21.4124	3.531	0.54144				0.0705451	2.78986
	201.713	201.893	63.487	7.28338	19.2508	4.02071	0.48474				0.0665542	2.64312
	201.714	201.894	63.488	6.07865	18.6595	3.52807	0.45144				0.0742665	3.06967
	201.715	201.895	63.489	8.49579	21.1903	3.54293	0.5442				0.0640553	2.49421
	201.716	201.896	63.49	6.81718	19.8431	3.11736	0.4908				0.0719946	2.91075
	201.717	201.897	63.491	5.10591	19.5549	2.28164	0.47058				0.0921638	3.82986
	201.718	201.898	63.492	6.53156	16.0711	1.39543	0.38862				0.0594988	2.46053
	201.719	201.899	63.493	6.09702	17.1133	1.72643	0.41952				0.0688073	2.80682
	201.72	201.9	63.494	7.86547	18.6959	1.20829	0.45876				0.0583258	2.37696
	201.721	201.901	63.495	6.65042	16.695	1.25371	0.40656				0.061133	2.51036
	201.722	201.902	63.496	7.14902	14.8262	1.39943	0.36642				0.0512546	2.07388
	201.723	201.903	63.497	5.69509	17.1452	1.70521	0.41196				0.0723359	3.01052
	201.724	201.904	63.498	6.25304	17.203	1.31364	0.41844				0.0669178	2.75114
	201.725	201.905	63.499	5.50408	15.7387	1.30193	0.3537				0.0642614	2.85946
	201.726	201.906	63.5	3.69296	10.4601	0.842857	0.2448				0.0662882	2.83245
	201.728	201.908	63.501	6.18385	12.2328	1.48129	0.30024				0.0485523	1.97818
	201.729	201.909	63.502	7.7418	17.614	2.29986	0.42288				0.054623	2.27518
	201.73	201.91	63.503	6.2361	16.074	1.64014	0.35184				0.0564199	2.57757
	201.731	201.911	63.504	5.79198	14.6481	1.09171	0.35022				0.0604664	2.52903
	201.732	201.912	63.505	5.06388	12.4263	0.892143	0.29766				0.0587811	2.45391
	201.733	201.913	63.506	6.11513	19.8813	1.033	0.44184				0.0722536	3.25117
	201.734	201.914	63.507	6.37195	20.8021	1.25643	0.48666				0.0763754	3.26464
		201.915	63.508	6.39656	20.3799	1.12882	0.46596				0.0728454	3.18607
	201.735	201.915	63.509	6.42118	19.9577	1.00121	0.44526				0.0693424	3.1081
	201.736	201.916	63.51	6.13032	16.3804	0.6985	0.38256				0.0624045	2.67203
	201.737	201.917	63.511	3.98208	10.7212	0.585929	0.20034				0.0503104	2.69238
	201.738	201.918	63.512	7.48186	20.6436	1.52293	0.51018				0.0681889	2.75915
	201.739	201.919	63.513	5.18088	13.1172	0.675786	0.30252				0.0583917	2.53185
	201.74	201.92	63.514	6.72956	17.8029	1.2555	0.43782				0.0650592	2.64547
	201.741	201.921	63.515	5.47332	17.9098	1.14964	0.42948				0.0784679	3.2722
	201.742	201.922	63.516	5.45845	17.1195	1.14986	0.40956				0.0750323	3.13633
	201.743	201.923	63.517	6.83682	18.6381	1.46486	0.4443				0.0649863	2.72614
	201.744	201.924	63.518	7.81549	18.9734	1.53064	0.46506				0.0595049	2.42767
	201.745	201.925	63.519	7.58134	19.7868	1.87471	0.4605				0.0607413	2.60993
	201.746	201.926	63.52	5.83719	18.9287	1.71693	0.44364				0.0760023	3.24277
	201.747	201.927	63.521	7.96722	23.5013	1.94879	0.5277				0.0662339	2.94975
	201.748	201.928	63.522	7.49488	23.8468	1.13736	0.49434				0.065957	3.18175
	201.749	201.929	63.523	5.59181	15.8543	0.709	0.29148				0.0521263	2.83527
	201.75	201.93	63.524	9.29314	25.3482	1.40707	0.57348				0.0617101	2.72763
	201.751	201.931	63.525	7.47175	25.6365	1.28321	0.53052				0.0710035	3.43112
	201.752	201.932	63.526	8.72725	24.3442	1.60814	0.51078				0.058527	2.78945
	201.753	201.933	63.527	7.81999	23.12	2.03929	0.48138				0.0615576	2.95652
	201.754	201.934	63.528	7.18152	21.7449	1.29029	0.47352				0.0659359	3.02789
	201.755	201.935	63.529	7.77547	22.6239	1.41843	0.51444				0.0661619	2.90965
	201.756	201.936	63.53	8.51755	24.7037	2.27564	0.54546				0.0640396	2.90033
	201.758	201.938	63.531	8.48631	24.0021	2.03079	0.51534				0.060726	2.82833
	201.759	201.939	63.532	10.1465	24.9487	1.55893	0.55626				0.0548229	2.45884
	201.76	201.94	63.533	6.09041	16.9025	0.965357	0.33528				0.0550505	2.77527
	201.761	201.941	63.534	8.57779	22.9407	1.28843	0.48786				0.0568748	2.67443
	201.762	201.942	63.535	9.90868	26.2042	2.29207	0.55434				0.0559449	2.64457
	201.763	201.943	63.536	8.6265	23.4793	2.77443	0.51678				0.0599061	2.72176
	201.764	201.944	63.537	7.60225	20.9292	3.4605	0.47712				0.0627604	2.75302
		201.945	63.538	8.78109	24.3306	2.37086	0.5379				0.0612566	2.7708
	201.765	201.945	63.539	9.95993	27.7321	1.28121	0.59868				0.0601089	2.78437
	201.766	201.946	63.54	8.79215	27.3817	1.48214	0.57822				0.0657655	3.11433
	201.767	201.947	63.541	9.10382	25.269	1.98321	0.53874				0.0591774	2.77565
	201.768	201.948	63.542	8.81592	26.2138	1.51379	0.57684				0.0654316	2.97346
	201.769	201.949	63.543	9.15215	26.6833	1.72579	0.58734				0.0641751	2.91552
	201.77	201.95	63.544	8.08422	25.5544	1.67107	0.56982				0.0704854	3.16103
	201.771	201.951	63.545	7.32018	22.0541	5.40621	0.48834				0.0667115	3.01278
	201.772	201.952	63.546	7.13292	24.549	1.11579	0.53994				0.0756969	3.44164
	201.773	201.953	63.547	9.27731	27.6871	1.25286	0.59478				0.0641113	2.9844
	201.774	201.954	63.548	8.44391	26.7042	1.1905	0.57264				0.067817	3.16254
	201.775	201.955	63.549	8.60358	27.3741	1.28921	0.56052				0.0651497	3.18171
	201.776	201.956	63.55	9.18106	23.9304	1.12357	0.5448				0.0593396	2.6065
	201.777	201.957	63.551	9.09619	26.1034	1.239	0.57516				0.0632308	2.8697
	201.778	201.958	63.552	7.28354	22.6012	3.55279	0.47124				0.0646993	3.10305
	201.779	201.959	63.553	8.09169	17.4833	11.2728	0.38106				0.0470928	2.16065
	201.78	201.96	63.554	8.85314	22.595	7.93007	0.53178				0.0600668	2.5522
	201.781	201.961	63.555	9.99418	30.7776	1.30079	0.69036				0.0690762	3.07955
	201.782	201.962	63.556	9.80587	31.1917	1.18271	0.68364				0.0697174	3.18092
	201.783	201.963	63.557	9.47478	29.936	0.720929	0.6456				0.0681388	3.15955
	201.784	201.964	63.558	9.81212	28.3065	0.850714	0.59034				0.0601644	2.88485
	201.785	201.965	63.559	9.85611	29.3527	1.14171	0.58458				0.0593114	2.97812
	201.786	201.966	63.56	9.13039	29.8396	0.772143	0.6156				0.0674232	3.26817
	201.788	201.968	63.561	10.9916	28.4945	0.526286	0.5682				0.0516938	2.59238
	201.789	201.969	63.562	9.8874	29.4476	0.506071	0.58338				0.0590024	2.9783
	201.79	201.97	63.563	9.63461	29.238	0.856143	0.61416				0.0637452	3.03469
	201.791	201.971	63.564	8.18232	26.1813	1.17479	0.58644				0.0716716	3.19973
	201.792	201.972	63.565	10.1154	25.9653	1.76621	0.57756				0.057097	2.5669
	201.793	201.973	63.566	6.95081	21.4102	1.43757	0.48324				0.0695229	3.08024
	201.794	201.974	63.567	8.69876	23.3394	1.54707	0.54198				0.0623054	2.68307
		201.975	63.568	8.53888	23.232	1.547	0.54156				0.0634228	2.72073
	201.795	201.975	63.569	8.379	23.1246	1.54693	0.54114				0.0645829	2.75983
	201.796	201.976	63.57	7.17348	20.9703	1.48129	0.48708				0.0679001	2.92331
	201.797	201.977	63.571	9.25994	22.6384	2.02007	0.53352				0.0576159	2.44477
	201.798	201.978	63.572	10.257	25.0533	2.17371	0.59616				0.0581224	2.44256
	201.799	201.979	63.573	8.19244	24.984	2.56014	0.55878				0.0682068	3.04965
	201.8	201.98	63.574	9.34152	26.7571	2.10779	0.59628				0.0638311	2.86432
	201.801	201.981	63.575	9.51909	26.8661	2.00143	0.60924				0.0640019	2.82234
	201.802	201.982	63.576	8.36502	24.795	2.6175	0.5757				0.0688223	2.96413
	201.803	201.983	63.577	8.76139	25.707	2.21479	0.57666				0.0658183	2.93412
	201.804	201.984	63.578	8.05537	22.7541	2.86557	0.4929				0.061189	2.82471
	201.805	201.985	63.579	9.20499	25.9165	3.15957	0.56652				0.0615449	2.81549
	201.806	201.986	63.58	8.58971	26.2137	1.95936	0.5733				0.0667427	3.05176
	201.807	201.987	63.581	8.48224	24.1352	2.71707	0.54006				0.0636695	2.84538
	201.808	201.988	63.582	9.4302	26.9926	1.67921	0.58686				0.062232	2.86235
	201.809	201.989	63.583	8.57308	24.5801	2.82557	0.56244				0.0656053	2.86713
	201.81	201.99	63.584	9.84881	26.5304	2.41093	0.57192				0.05807	2.69377
	201.811	201.991	63.585	8.33718	25.9613	2.59129	0.57804				0.0693328	3.11392
	201.812	201.992	63.586	9.62407	27.858	1.22721	0.59106				0.0614148	2.89462
	201.813	201.993	63.587	9.85463	28.9842	0.656214	0.61572				0.0624803	2.94118
	201.814	201.994	63.588	9.93441	28.8359	0.640429	0.61194				0.061598	2.90263
	201.815	201.995	63.589	9.09095	27.6546	1.02171	0.60072				0.0660789	3.04199
	201.816	201.996	63.59	9.70338	26.7975	1.62586	0.6285				0.0647713	2.76167
	201.817	201.997	63.591	7.52194	21.3992	1.35743	0.4299				0.0571528	2.84491
	201.819	201.999	63.592	7.80432	24.7774	2.06321	0.59412				0.076127	3.17483
	201.82	202	63.593	9.3501	27.0974	1.63414	0.63426				0.0678346	2.89809
	201.821	202.001	63.594	8.26046	26.6302	1.49771	0.61506				0.0744583	3.22382
	201.822	202.002	63.595	10.3485	26.6117	1.73136	0.6189				0.059806	2.57156
	201.823	202.003	63.596	9.70131	26.4466	2.09157	0.6				0.0618473	2.72608
	201.824	202.004	63.597	7.81878	23.3769	2.45257	0.55926				0.0715278	2.98984
		202.005	63.598	8.40155	24.8714	2.72207	0.57276				0.0681731	2.96033
	201.825	202.005	63.599	8.98433	26.3659	2.99157	0.58626				0.0652536	2.93466
	201.826	202.006	63.6	8.82069	25.4857	3.52779	0.58344				0.0661445	2.88931
	201.827	202.007	63.601	9.26291	26.0611	3.13993	0.61386				0.0662708	2.8135
	201.828	202.008	63.602	9.17614	26.3375	3.1145	0.60732				0.0661847	2.87022
	201.829	202.009	63.603	8.74435	25.0677	3.84686	0.57126				0.0653291	2.86673
	201.83	202.01	63.604	7.7157	21.4424	4.10736	0.49818				0.0645671	2.77905
	201.831	202.011	63.605	8.09164	22.3243	4.1195	0.51966				0.0642219	2.75893
	201.832	202.012	63.606	7.97887	22.4617	4.12843	0.5295				0.0663628	2.81515
	201.833	202.013	63.607	7.60039	20.5898	4.44029	0.50118				0.0659413	2.70904
	201.834	202.014	63.608	6.53469	15.7847	5.27307	0.38856				0.0594611	2.41553
	201.835	202.015	63.609	4.60466	13.9963	3.69043	0.32664				0.0709368	3.03959
	201.836	202.016	63.61	7.32372	21.1299	4.50271	0.5211				0.0711523	2.88513
	201.837	202.017	63.611	5.71431	18.8403	5.0835	0.4839				0.0846821	3.29704
	201.838	202.018	63.612	6.10189	19.6795	4.66707	0.46248				0.0757929	3.22515
	201.839	202.019	63.613	4.93359	15.3911	4.55193	0.37914				0.0768487	3.11965
	201.84	202.02	63.614	7.07273	14.2731	4.08314	0.3795				0.0536568	2.01805
	201.841	202.021	63.615	4.89235	11.0797	3.28457	0.30252				0.0618354	2.26471
	201.842	202.022	63.616	5.68048	14.0941	3.78664	0.38568				0.0678956	2.48115
	201.843	202.023	63.617	7.17978	16.7249	5.174	0.44862				0.0624838	2.32945
	201.844	202.024	63.618	6.99623	16.0595	5.40871	0.4017				0.0574166	2.29546
	201.845	202.025	63.619	5.99299	13.3267	3.04114	0.35256				0.0588287	2.22372
	201.846	202.026	63.62	6.35437	13.669	4.24536	0.37536				0.0590712	2.15112
	201.847	202.027	63.621	5.29084	11.2977	4.1705	0.30234				0.0571441	2.13534
	201.849	202.029	63.622	5.55734	13.0359	4.17886	0.35592				0.064045	2.34571
	201.85	202.03	63.623	6.58594	12.8568	3.33429	0.3513				0.0533409	1.95216
	201.851	202.031	63.624	4.54775	11.0883	2.58814	0.30018				0.0660062	2.4382
	201.852	202.032	63.625	5.47952	11.6543	2.7755	0.32568				0.0594359	2.12688
	201.853	202.033	63.626	4.27616	11.2919	2.1405	0.29076				0.0679955	2.64066
	201.854	202.034	63.627	7.41637	17.7466	3.29393	0.45006				0.0606847	2.3929
	201.855	202.035	63.628	7.23695	16.9046	3.493	0.44832				0.0619487	2.33588
		202.036	63.629	6.49167	16.399	3.66414	0.43902				0.0676282	2.52615
	201.856	202.036	63.63	5.74639	15.8933	3.83529	0.42972				0.0747808	2.76579
	201.857	202.037	63.631	6.48228	15.9831	4.67993	0.43638				0.0673189	2.46566
	201.858	202.038	63.632	7.28238	18.8794	4.86079	0.5055				0.0694142	2.59248
	201.859	202.039	63.633	6.79722	20.0226	4.28021	0.48582				0.0714733	2.9457
	201.86	202.04	63.634	7.09735	18.7901	4.93479	0.48498				0.0683326	2.64748
	201.861	202.041	63.635	5.82326	16.9424	4.677	0.435				0.0747004	2.90943
	201.862	202.042	63.636	6.77128	19.3553	4.96793	0.4941				0.0729699	2.85844
	201.863	202.043	63.637	7.33346	19.3009	5.90521	0.48354				0.0659361	2.6319
	201.864	202.044	63.638	5.33202	18.0763	5.05736	0.45072				0.0845308	3.39014
	201.865	202.045	63.639	7.56545	19.8722	4.94871	0.4803				0.063486	2.6267
	201.866	202.046	63.64	6.90861	21.0085	4.40314	0.49518				0.0716758	3.04092
	201.867	202.047	63.641	7.66916	17.9853	3.39486	0.37884				0.0493978	2.34515
	201.868	202.048	63.642	7.79659	21.9663	4.52264	0.5235				0.0671447	2.81743
	201.869	202.049	63.643	7.91381	21.2142	3.99443	0.51042				0.0644974	2.68065
	201.87	202.05	63.644	8.41098	24.5944	3.65964	0.55356				0.065814	2.92408
	201.871	202.051	63.645	8.30758	20.0642	4.63336	0.49506				0.0595913	2.41517
	201.872	202.052	63.646	7.99878	21.4684	4.14143	0.50982				0.0637372	2.68397
	201.873	202.053	63.647	7.56757	21.2088	4.5505	0.49506				0.0654186	2.80259
	201.874	202.054	63.648	8.73651	24.4716	3.92043	0.55662				0.0637119	2.80107
	201.875	202.055	63.649	7.89835	22.1932	3.203	0.50778				0.0642894	2.80985
	201.876	202.056	63.65	8.15363	23.4674	3.0435	0.55122				0.0676042	2.87815
	201.877	202.057	63.651	8.07062	22.3244	3.08764	0.5184				0.064233	2.76613
	201.879	202.059	63.652	8.54306	23.1457	3.87471	0.52722				0.0617132	2.7093
	201.88	202.06	63.653	6.90967	18.5237	3.26636	0.41724				0.0603849	2.68083
	201.881	202.061	63.654	8.16586	22.7865	3.88143	0.52758				0.064608	2.79046
	201.882	202.062	63.655	7.44776	22.7748	2.81493	0.52656				0.0707004	3.05793
	201.883	202.063	63.656	8.49484	24.6934	2.90543	0.57504				0.0676929	2.90688
	201.884	202.064	63.657	8.1909	23.9791	2.69836	0.54078				0.066022	2.92753
	201.885	202.065	63.658	7.74842	21.2195	2.79929	0.49644				0.0640699	2.73856
		202.065	63.659	7.91359	22.1799	2.70175	0.51468				0.0650375	2.80276
	201.886	202.066	63.66	8.07877	23.1404	2.60421	0.53292				0.0659655	2.86434
	201.887	202.067	63.661	9.09852	23.8235	2.45	0.55116				0.0605769	2.61839
	201.888	202.068	63.662	7.94329	22.995	2.78871	0.53292				0.0670906	2.8949
	201.889	202.069	63.663	8.32378	22.6571	4.50157	0.5058				0.0607656	2.72198
	201.89	202.07	63.664	7.97072	22.4838	3.60979	0.53718				0.0673942	2.8208
	201.891	202.071	63.665	8.00704	21.2515	4.66979	0.48192				0.0601871	2.65411
	201.892	202.072	63.666	7.12668	19.8452	7.69821	0.4218				0.0591861	2.78463
	201.893	202.073	63.667	9.09964	23.7161	7.67314	0.50196				0.0551627	2.60627
	201.894	202.074	63.668	9.06041	26.6604	3.20993	0.56766				0.0626528	2.94252
	201.895	202.075	63.669	9.05739	23.767	3.88614	0.50724				0.0560029	2.62404
	201.896	202.076	63.67	8.59611	24.3025	5.97936	0.50316				0.0585334	2.82715
	201.897	202.077	63.671	7.34289	24.5081	4.62179	0.57252				0.0779693	3.33767
	201.898	202.078	63.672	8.64238	25.685	4.19014	0.60222				0.0696822	2.97198
	201.899	202.079	63.673	8.60109	26.1456	4.5195	0.62472				0.0726327	3.0398
	201.9	202.08	63.674	9.2016	27.2214	2.62407	0.63258				0.0687467	2.95833
	201.901	202.081	63.675	9.96522	28.5103	2.60343	0.67248				0.0674827	2.86098
	201.902	202.082	63.676	9.13495	26.5658	3.81257	0.62928				0.0688871	2.90815
	201.903	202.083	63.677	8.92763	26.0813	3.83457	0.59364				0.0664947	2.92141
	201.904	202.084	63.678	10.4072	28.9635	2.78807	0.66492				0.0638902	2.78302
	201.905	202.085	63.679	9.29425	26.8435	2.35214	0.62376				0.0671125	2.88818
	201.906	202.086	63.68	9.56419	28.782	2.15914	0.68196				0.0713034	3.00935
	201.907	202.087	63.681	8.63566	25.2451	2.17521	0.603				0.0698268	2.92335
	201.909	202.089	63.682	9.24173	26.1219	0.964	0.62508				0.0676367	2.82651
	201.91	202.09	63.683	9.50162	28.6605	0.549643	0.60156				0.0633113	3.01638
	201.911	202.091	63.684	9.86474	28.9494	0.478643	0.60888				0.0617229	2.93463
	201.912	202.092	63.685	9.48092	24.9891	0.964643	0.54648				0.05764	2.63573
	201.913	202.093	63.686	9.19292	26.6625	1.06679	0.58014				0.0631073	2.90033
	201.914	202.094	63.687	8.27656	24.1846	1.71729	0.5601				0.0676731	2.92206
	201.915	202.095	63.688	7.66255	21.3745	3.3215	0.52122				0.0680218	2.78948
		202.096	63.689	7.64034	20.5998	3.68036	0.5034				0.0658871	2.69618
	201.916	202.096	63.69	7.61813	19.825	4.03921	0.48558				0.0637401	2.60234
	201.917	202.097	63.691	7.2378	18.3893	4.3595	0.45564				0.0629528	2.54073
	201.918	202.098	63.692	7.98634	20.4874	3.71621	0.51348				0.0642948	2.56531
	201.919	202.099	63.693	7.58785	20.2557	3.25207	0.50028				0.0659317	2.66949
	201.92	202.1	63.694	7.99766	20.4052	3.83107	0.50652				0.0633335	2.5514
	201.921	202.101	63.695	9.08921	22.315	3.76536	0.55212				0.0607446	2.45511
	201.922	202.102	63.696	6.09713	16.037	3.22607	0.42684				0.0700067	2.63026
	201.923	202.103	63.697	6.86822	16.6555	4.57964	0.46494				0.0676944	2.42501
	201.924	202.104	63.698	5.41376	16.7787	4.64343	0.41088				0.0758954	3.09927
	201.925	202.105	63.699	7.94086	18.5969	4.25871	0.46236				0.0582254	2.34192
	201.926	202.106	63.7	7.58059	21.0154	3.29121	0.53466				0.0705301	2.77227
	201.927	202.107	63.701	7.03493	19.1671	2.91357	0.49038				0.0697065	2.72456
	201.928	202.108	63.702	7.11921	20.0696	3.11464	0.48708				0.0684177	2.81908
	201.929	202.109	63.703	8.18841	21.1876	3.27171	0.51306				0.0626568	2.58751
	201.93	202.11	63.704	8.10339	22.4135	2.83521	0.52152				0.0643583	2.76594
	201.931	202.111	63.705	7.30594	19.9371	3.45693	0.49392				0.0676053	2.72889
	201.932	202.112	63.706	6.11439	16.9327	4.07521	0.44418				0.072645	2.76932
	201.933	202.113	63.707	6.48704	16.8954	4.56293	0.4173				0.0643282	2.60449
	201.934	202.114	63.708	6.42653	19.52	4.40436	0.46122				0.0717681	3.0374
	201.935	202.115	63.709	7.68791	21.2189	3.21557	0.546				0.0710206	2.76003
	201.936	202.116	63.71	7.43988	18.1606	3.8935	0.47916				0.0644043	2.44098
	201.937	202.117	63.711	6.54914	19.255	3.48864	0.49422				0.0754633	2.94009
	201.938	202.118	63.712	7.2468	19.9353	3.82857	0.51486				0.0710465	2.75091
	201.94	202.12	63.713	7.11635	16.2576	4.74686	0.43512				0.0611437	2.28455
	201.941	202.121	63.714	5.83984	17.7479	4.24486	0.4581				0.078444	3.03912
	201.942	202.122	63.715	6.93683	20.9799	3.56721	0.5256				0.0757695	3.02443
	201.943	202.123	63.716	8.16522	22.967	2.87743	0.54366				0.0665824	2.81278
	201.944	202.124	63.717	6.70463	19.158	4.03121	0.4626				0.0689971	2.85742
	201.945	202.125	63.718	8.76727	20.2248	4.41707	0.52602				0.0599981	2.30685
		202.125	63.719	8.25125	20.1086	4.02514	0.51168				0.0620124	2.43704
	201.946	202.126	63.72	7.73524	19.9925	3.63321	0.49734				0.0642954	2.5846
	201.947	202.127	63.721	5.90824	17.8769	3.48229	0.43878				0.0742658	3.02576
	201.948	202.128	63.722	7.81904	22.3516	3.70336	0.53418				0.0683178	2.85861
	201.949	202.129	63.723	6.99549	20.2174	3.61057	0.48876				0.0698679	2.89006
	201.95	202.13	63.724	7.52972	20.3027	3.76957	0.50244				0.0667276	2.69634
	201.951	202.131	63.725	7.61855	22.3429	3.54743	0.53988				0.0708639	2.93269
	201.952	202.132	63.726	8.08348	21.3155	4.28764	0.52938				0.0654891	2.63692
	201.953	202.133	63.727	7.00031	21.1912	3.664	0.52122				0.0744567	3.02718
	201.954	202.134	63.728	6.71707	20.8013	3.76543	0.52314				0.0778822	3.09679
	201.955	202.135	63.729	7.46036	20.7176	4.08843	0.4986				0.0668332	2.77702
	201.956	202.136	63.73	7.64677	19.555	4.20293	0.50184				0.0656277	2.55729
	201.957	202.137	63.731	5.94514	16.057	5.18843	0.43794				0.0736636	2.70087
	201.958	202.138	63.732	5.18707	15.8465	4.68193	0.41706				0.0804038	3.05499
	201.959	202.139	63.733	8.78066	21.5242	4.28993	0.53724				0.0611844	2.45132
	201.96	202.14	63.734	7.96595	22.0274	3.71557	0.52596				0.066026	2.7652
	201.961	202.141	63.735	8.24834	22.9192	3.61729	0.52542				0.0637001	2.77864
	201.962	202.142	63.736	8.95638	22.4609	3.95393	0.53682				0.0599372	2.50781
	201.963	202.143	63.737	8.12134	23.2811	3.38207	0.52638				0.0648145	2.86666
	201.964	202.144	63.738	4.5873	14.8341	3.82836	0.42894				0.093506	3.23373
	201.965	202.145	63.739	5.19607	13.9999	4.32593	0.39882				0.0767542	2.69432
	201.966	202.146	63.74	6.77208	16.6843	4.90943	0.45756				0.0675657	2.46369
	201.967	202.147	63.741	7.51839	19.6775	4.69471	0.48498				0.0645058	2.61725
	201.968	202.148	63.742	7.8957	18.4183	3.93393	0.46926				0.0594323	2.3327
	201.97	202.15	63.743	6.32801	18.6072	3.015	0.42942				0.0678602	2.94045
	201.971	202.151	63.744	7.12504	18.4194	4.76843	0.45378				0.0636881	2.58516
	201.972	202.152	63.745	6.63951	18.0642	4.47429	0.46536				0.0700895	2.72071
	201.973	202.153	63.746	6.54925	18.5909	4.68507	0.4596				0.070176	2.83863
	201.974	202.154	63.747	7.20143	17.4295	4.96293	0.44868				0.0623043	2.42028
	201.975	202.155	63.748	7.25739	16.3201	4.9925	0.42894				0.0591039	2.24875
		202.156	63.749	6.85249	15.6299	5.03854	0.41589				0.0606918	2.2809
	201.976	202.156	63.75	6.4476	14.9397	5.08457	0.40284				0.0624791	2.31709
	201.977	202.157	63.751	6.34235	16.0742	4.48629	0.4254				0.0670729	2.53443
	201.978	202.158	63.752	5.76593	15.4024	4.47393	0.40074				0.0695014	2.67128
	201.979	202.159	63.753	5.28416	15.8548	4.80907	0.40548				0.0767349	3.00043
	201.98	202.16	63.754	5.96123	14.5799	4.02229	0.33006				0.0553678	2.44579
	201.981	202.161	63.755	6.11174	16.4179	5.12743	0.45288				0.0741	2.68629
	201.982	202.162	63.756	8.30811	17.4152	5.48193	0.45084				0.054265	2.09616
	201.983	202.163	63.757	4.66004	13.2416	4.47521	0.34236				0.0734672	2.84151
	201.984	202.164	63.758	8.65456	19.6954	4.831	0.52206				0.060322	2.27572
	201.985	202.165	63.759	6.95022	17.5383	4.56014	0.47088				0.0677503	2.52342
	201.986	202.166	63.76	7.16871	17.6937	4.51686	0.46452				0.0647983	2.46819
	201.987	202.167	63.761	6.15542	15.6198	4.36636	0.42342				0.0687882	2.53756
	201.988	202.168	63.762	7.26861	17.4076	4.68357	0.45744				0.0629336	2.39491
	201.989	202.169	63.763	6.8823	17.7761	5.51129	0.4596				0.06678	2.58287
	201.99	202.17	63.764	6.02974	17.0188	5.5755	0.45504				0.075466	2.82248
	201.991	202.171	63.765	7.70421	19.7232	6.18614	0.5013				0.0650683	2.56005
	201.992	202.172	63.766	7.7895	22.5402	4.59129	0.53652				0.0688773	2.89367
	201.993	202.173	63.767	8.07697	21.4942	5.39957	0.47706				0.0590642	2.66117
	201.994	202.174	63.768	8.85325	24.0739	4.72771	0.5418				0.0611979	2.71922
	201.995	202.175	63.769	7.58944	21.0669	5.64036	0.49896				0.065744	2.77582
	201.996	202.176	63.77	7.76499	22.0769	5.72779	0.5286				0.0680748	2.84313
	201.997	202.177	63.771	6.65497	19.3743	6.55143	0.45798				0.0688177	2.91125
	201.998	202.178	63.772	6.14584	19.7961	5.15579	0.47958				0.0780333	3.22107
	202	202.18	63.773	6.90311	17.795	6.14564	0.4671				0.0676652	2.57783
	202.001	202.181	63.774	6.99226	19.4645	6.99036	0.47466				0.0678836	2.78372
	202.002	202.182	63.775	7.19979	18.8925	6.90079	0.4569				0.0634602	2.62404
	202.003	202.183	63.776	8.42252	22.4857	5.28993	0.51954				0.0616846	2.66972
	202.004	202.184	63.777	7.08178	20.5959	4.68007	0.46356				0.0654581	2.9083
	202.005	202.185	63.778	8.81862	23.9773	3.82971	0.53478				0.0606421	2.71894
	202.006	202.186	63.779	8.36952	21.3546	3.59379	0.50754				0.0606414	2.55147
		202.187	63.78	7.99396	21.1485	3.40564	0.49722				0.0621995	2.64557
	202.007	202.187	63.781	7.61839	20.9425	3.2175	0.4869				0.0639111	2.74893
	202.008	202.188	63.782	7.52834	22.0281	3.58186	0.49758				0.0660942	2.92602
	202.009	202.189	63.783	7.62173	21.172	3.33543	0.47682				0.0625606	2.77785
	202.01	202.19	63.784	7.34109	21.4467	2.75579	0.48012				0.0654017	2.92146
	202.011	202.191	63.785	6.29936	19.7136	3.54993	0.40692				0.064597	3.12946
	202.012	202.192	63.786	7.26226	19.7224	2.90929	0.40818				0.0562057	2.71573
	202.013	202.193	63.787	5.57164	17.6651	3.16029	0.3702				0.0664437	3.17053
	202.014	202.194	63.788	7.89406	19.8779	4.41736	0.48882				0.0619225	2.51808
	202.015	202.195	63.789	8.49399	20.7638	4.35671	0.52062				0.0612928	2.44453
	202.016	202.196	63.79	7.33267	21.3064	3.9615	0.47556				0.064855	2.90568
	202.017	202.197	63.791	6.28878	17.9753	3.69829	0.42372				0.0673772	2.85831
	202.018	202.198	63.792	8.92345	22.2928	3.77379	0.53754				0.0602391	2.49823
	202.019	202.199	63.793	7.99264	21.3846	3.54157	0.50004				0.0625626	2.67554
	202.02	202.2	63.794	7.37412	20.9159	4.08793	0.48462				0.065719	2.83639
	202.021	202.201	63.795	8.31304	20.1048	3.58029	0.48072				0.0578273	2.41847
	202.022	202.202	63.796	7.64555	23.39	3.31357	0.54942				0.0718614	3.05929
	202.023	202.203	63.797	8.30149	23.053	3.748	0.54558				0.0657207	2.77697
	202.024	202.204	63.798	8.865	22.4981	3.33157	0.5466				0.0616582	2.53786
	202.025	202.205	63.799	7.63973	23.4108	2.8235	0.50682				0.06634	3.06435
	202.026	202.206	63.8	9.05956	21.7537	5.20557	0.51684				0.0570491	2.40119
	202.027	202.207	63.801	8.10519	20.17	3.40021	0.48588				0.0599468	2.48853
	202.028	202.208	63.802	5.77366	17.7046	2.79779	0.43068				0.0745939	3.06644
	202.03	202.21	63.803	7.812	23.0658	3.40036	0.52674				0.067427	2.95262
	202.031	202.211	63.804	8.90412	23.8644	3.40779	0.52572				0.0590423	2.68016
	202.032	202.212	63.805	7.63894	21.889	3.22436	0.49332				0.0645797	2.86545
	202.033	202.213	63.806	7.39535	20.9388	3.74393	0.48174				0.0651409	2.83134
	202.034	202.214	63.807	6.71982	19.3707	3.5315	0.44934				0.0668678	2.88262
	202.035	202.215	63.808	7.35581	20.046	4.41064	0.48444				0.0658582	2.72519
	202.036	202.216	63.809	6.49324	16.765	6.45371	0.36426				0.0560984	2.58191
		202.216	63.81	6.35212	16.0685	5.87771	0.35391				0.0557153	2.52963
	202.037	202.217	63.811	6.21101	15.3721	5.30171	0.34356				0.0553147	2.47498
	202.038	202.218	63.812	8.13198	19.8351	3.72521	0.48216				0.0592919	2.43914
	202.039	202.219	63.813	7.14812	20.4969	3.207	0.48912				0.0684264	2.86746
	202.04	202.22	63.814	8.10122	23.1594	3.47743	0.55038				0.0679379	2.85876
	202.041	202.221	63.815	6.0318	20.1988	2.88879	0.49386				0.0818761	3.34872
	202.042	202.222	63.816	6.41822	19.6115	4.19629	0.47268				0.0736466	3.0556
	202.043	202.223	63.817	6.06611	18.8205	3.76929	0.46392				0.0764774	3.10257
	202.044	202.224	63.818	7.06908	18.9563	4.07121	0.47976				0.0678674	2.68158
	202.045	202.225	63.819	8.45926	24.2245	3.75164	0.53082				0.0627502	2.86366
	202.046	202.226	63.82	8.96368	23.4716	4.26479	0.53958				0.0601962	2.61852
	202.047	202.227	63.821	8.09809	20.522	6.19821	0.51918				0.0641114	2.53418
	202.048	202.228	63.822	8.5041	22.612	4.79979	0.51234				0.0602462	2.65895
	202.049	202.229	63.823	7.53242	22.3574	4.091	0.5097				0.0676675	2.96816
	202.05	202.23	63.824	8.77812	22.869	3.51443	0.51756				0.0589602	2.60523
	202.051	202.231	63.825	6.70399	21.5579	2.94214	0.49632				0.0740335	3.21568
	202.052	202.232	63.826	6.52415	19.958	3.18014	0.49494				0.0758627	3.05909
	202.053	202.233	63.827	6.85196	19.4204	3.25707	0.48126				0.0702368	2.83428
	202.054	202.234	63.828	6.92709	21.0905	3.21793	0.51372				0.074161	3.04465
	202.055	202.235	63.829	8.06426	21.7947	3.09043	0.52362				0.0649309	2.70263
	202.056	202.236	63.83	8.91048	20.8533	3.69507	0.51114				0.0573639	2.34032
	202.057	202.237	63.831	7.5096	20.0812	3.48036	0.46836				0.0623682	2.67407
	202.058	202.238	63.832	7.85096	21.8162	3.65307	0.5067				0.0645398	2.7788
	202.06	202.24	63.833	7.41028	20.6249	4.15871	0.47406				0.0639733	2.78329
	202.061	202.241	63.834	7.25225	21.0412	3.21307	0.48954				0.0675018	2.90133
	202.062	202.242	63.835	5.43822	19.2747	3.38143	0.47256				0.086896	3.54431
	202.063	202.243	63.836	6.78664	18.759	4.18929	0.48102				0.0708775	2.76411
	202.064	202.244	63.837	7.18618	20.2203	4.44986	0.50178				0.0698257	2.81377
	202.065	202.245	63.838	6.09708	18.7602	4.36414	0.47034				0.0771419	3.07692
	202.066	202.246	63.839	6.3405	17.7568	4.15407	0.4476				0.0705938	2.80053
		202.247	63.84	6.97008	18.5861	4.11639	0.45525				0.0653149	2.66655
	202.067	202.247	63.841	7.59965	19.4153	4.07871	0.4629				0.0609107	2.55477
	202.068	202.248	63.842	7.43548	18.6055	3.07371	0.42816				0.0575834	2.50226
	202.069	202.249	63.843	7.84069	21.6826	3.22171	0.46758				0.059635	2.7654
	202.07	202.25	63.844	7.23626	21.7644	3.29857	0.51648				0.0713738	3.00768
	202.071	202.251	63.845	7.77669	20.2248	4.18671	0.50898				0.0654495	2.6007
	202.072	202.252	63.846	6.18041	17.2267	5.39021	0.43728				0.0707526	2.7873
	202.073	202.253	63.847	5.68043	16.0105	5.14014	0.42672				0.0751211	2.81854
	202.074	202.254	63.848	5.93513	17.663	5.72407	0.43266				0.0728982	2.97601
	202.075	202.255	63.849	7.05356	18.6483	6.93179	0.44874				0.0636189	2.64381
	202.076	202.256	63.85	6.09596	19.4465	3.50057	0.5064				0.0830713	3.19006
	202.077	202.257	63.851	7.06897	21.1844	2.47807	0.5211				0.0737165	2.99681
	202.078	202.258	63.852	7.62951	22.673	2.778	0.53838				0.0705655	2.97174
	202.079	202.259	63.853	6.00289	18.0541	3.6545	0.4776				0.0795616	3.00757
	202.08	202.26	63.854	6.26395	19.586	2.97529	0.48732				0.0777976	3.12678
	202.081	202.261	63.855	5.80654	19.2071	2.12857	0.47274				0.0814152	3.30784
	202.082	202.262	63.856	7.76726	21.8706	1.98879	0.51324				0.0660773	2.81574
	202.083	202.263	63.857	7.1685	20.8	1.85557	0.4986				0.0695543	2.90159
	202.084	202.264	63.858	5.27368	13.1536	4.89814	0.30276				0.0574096	2.4942
	202.085	202.265	63.859	7.32536	20.4948	2.46164	0.49608				0.0677209	2.79778
	202.086	202.266	63.86	7.16654	20.042	2.78421	0.48354				0.0674719	2.79661
	202.087	202.267	63.861	7.236	18.813	3.00893	0.47148				0.0651575	2.59992
	202.088	202.268	63.862	5.70923	13.5501	6.40043	0.38694				0.0677745	2.37337
	202.089	202.269	63.863	5.69933	16.1202	4.11464	0.41256				0.0723875	2.82843
	202.091	202.271	63.864	6.29407	15.3299	3.19957	0.39162				0.0622205	2.43561
	202.092	202.272	63.865	3.87646	14.0224	3.094	0.3687				0.0951126	3.61731
	202.093	202.273	63.866	6.75265	18.5795	3.30657	0.45552				0.067458	2.75145
	202.094	202.274	63.867	6.00803	19.6777	2.0435	0.46656				0.0776561	3.27523
	202.095	202.275	63.868	7.218	18.9672	2.34114	0.46716				0.0647215	2.62777
	202.096	202.276	63.869	6.50626	16.2637	2.38914	0.39096				0.0600898	2.49969
		202.276	63.87	7.39077	18.8689	1.99625	0.45573				0.061662	2.55303
	202.097	202.277	63.871	8.27529	21.4741	1.60336	0.5205				0.0628981	2.59497
	202.098	202.278	63.872	8.57864	23.3911	1.54779	0.53136				0.0619399	2.72666
	202.099	202.279	63.873	8.00439	17.3729	2.55086	0.42594				0.0532133	2.17042
	202.1	202.28	63.874	6.12037	18.7932	3.10293	0.4758				0.0777404	3.0706
	202.101	202.281	63.875	5.12873	15.8684	2.10757	0.38328				0.074732	3.09403
	202.102	202.282	63.876	4.67201	15.6965	2.027	0.36522				0.078172	3.35969
	202.103	202.283	63.877	5.86779	15.1001	2.48843	0.36006				0.0613621	2.57338
	202.104	202.284	63.878	6.01555	17.7148	2.72836	0.44496				0.0739683	2.94483
	202.105	202.285	63.879	5.74507	17.8843	2.69521	0.46662				0.0812209	3.11299
	202.106	202.286	63.88	4.42038	14.1679	2.70936	0.3675				0.0831377	3.20514
	202.107	202.287	63.881	4.43499	15.9524	3.10407	0.41082				0.0926316	3.59694
	202.108	202.288	63.882	7.51998	17.9698	3.22321	0.49422				0.065721	2.38961
	202.109	202.289	63.883	6.61511	17.0615	2.84071	0.45564				0.0688787	2.57918
	202.11	202.29	63.884	8.44894	17.5763	3.40421	0.49746				0.0588784	2.0803
	202.111	202.291	63.885	4.50921	13.5887	2.622	0.35292				0.0782665	3.01354
	202.112	202.292	63.886	5.09474	13.5936	2.08207	0.31764				0.0623466	2.66817
	202.113	202.293	63.887	6.27512	15.1839	2.91486	0.40266				0.0641677	2.4197
	202.114	202.294	63.888	5.00146	13.7234	2.524	0.35298				0.0705754	2.74388
	202.115	202.295	63.889	4.14566	10.8152	2.35871	0.22902				0.0552433	2.60881
	202.116	202.296	63.89	5.42811	11.5618	4.2635	0.29892				0.0550689	2.12998
	202.117	202.297	63.891	5.32858	14.0508	3.78621	0.387				0.0726272	2.63687
	202.118	202.298	63.892	4.97308	14.6106	3.0405	0.38136				0.0766848	2.93793
	202.119	202.299	63.893	4.94841	13.3225	2.881	0.3402				0.0687493	2.69229
	202.121	202.301	63.894	5.76461	12.4331	3.455	0.34188				0.0593067	2.1568
	202.122	202.302	63.895	5.54654	12.7395	4.82357	0.3573				0.0644185	2.29684
	202.123	202.303	63.896	4.79573	9.40361	4.35871	0.2811				0.0586146	1.96083
	202.124	202.304	63.897	4.51112	8.561	3.80379	0.24624				0.0545851	1.89776
	202.125	202.305	63.898	5.49937	10.6383	3.00564	0.28398				0.0516386	1.93445
	202.126	202.306	63.899	5.56142	11.8568	4.12386	0.27732				0.049865	2.13198
		202.307	63.9	5.72429	13.442	4.29132	0.33777				0.0590064	2.34824
	202.127	202.307	63.901	5.88716	15.0272	4.45879	0.39822				0.0676421	2.55254
	202.128	202.308	63.902	5.22222	14.7125	3.6685	0.35382				0.0677527	2.81728
	202.129	202.309	63.903	5.64702	17.4305	3.32764	0.43968				0.0778605	3.08667
	202.13	202.31	63.904	5.7771	17.2921	2.49093	0.41016				0.0709976	2.99322
	202.131	202.311	63.905	5.95181	15.4414	2.60693	0.36192				0.0608084	2.5944
	202.132	202.312	63.906	5.65343	11.856	5.50257	0.28308				0.0500723	2.09714
	202.133	202.313	63.907	6.80167	11.4185	8.0285	0.28572				0.0420073	1.67878
	202.134	202.314	63.908	6.33224	18.7568	4.54286	0.49518				0.0781998	2.96211
	202.135	202.315	63.909	5.39148	16.6661	4.47164	0.4212				0.0781233	3.09119
	202.136	202.316	63.91	5.36659	15.207	3.24721	0.3819				0.0711625	2.83364
	202.137	202.317	63.911	6.04297	18.0354	3.43093	0.4431				0.0733249	2.98453
	202.138	202.318	63.912	6.13795	15.2888	3.27914	0.40512				0.0660025	2.49086
	202.139	202.319	63.913	6.30275	15.8211	4.34129	0.42492				0.0674182	2.51018
	202.14	202.32	63.914	6.72088	15.362	4.35993	0.4398				0.0654378	2.28571
	202.141	202.321	63.915	4.88059	12.7651	2.50436	0.3231				0.066201	2.61547
	202.142	202.322	63.916	3.37283	9.91531	1.68807	0.25362				0.075195	2.93976
	202.143	202.323	63.917	5.61944	13.6813	3.12014	0.37164				0.0661347	2.43464
	202.144	202.324	63.918	5.72792	15.3662	4.39014	0.46218				0.080689	2.68268
	202.145	202.325	63.919	5.58185	15.0451	4.92821	0.4176				0.0748139	2.69537
	202.146	202.326	63.92	6.76403	17.3125	4.29193	0.43458				0.0642487	2.55949
	202.147	202.327	63.921	6.78679	18.2248	3.07657	0.47742				0.0703454	2.68533
	202.148	202.328	63.922	7.29476	16.8759	3.30229	0.42438				0.058176	2.31342
	202.149	202.329	63.923	5.46866	15.7871	3.54629	0.42546				0.0777996	2.88684
	202.151	202.331	63.924	7.84445	19.1191	4.01514	0.50436				0.0642951	2.43727
	202.152	202.332	63.925	6.49689	19.1111	3.63386	0.48222				0.0742232	2.94157
	202.153	202.333	63.926	7.07633	18.8962	3.443	0.47214				0.066721	2.67034
	202.154	202.334	63.927	8.77934	22.5264	2.21157	0.5301				0.0603804	2.56584
	202.155	202.335	63.928	7.55285	20.8803	2.406	0.4803				0.0635919	2.76456
	202.156	202.336	63.929	7.12726	18.6088	3.73686	0.45354				0.0636346	2.61093
	202.157	202.337	63.93	9.51078	24.2393	2.84729	0.56178				0.0590677	2.54861
		202.338	63.931	8.09632	22.2229	2.70411	0.52527				0.0648776	2.74482
	202.158	202.338	63.932	6.68186	20.2066	2.56093	0.48876				0.0731472	3.0241
	202.159	202.339	63.933	7.90941	21.9191	2.85621	0.50988				0.064465	2.77127
	202.16	202.34	63.934	8.12366	21.0938	2.82529	0.48522				0.0597292	2.59659
	202.161	202.341	63.935	7.0416	19.2807	2.15014	0.44052				0.0625596	2.73811
	202.162	202.342	63.936	6.05425	18.4221	2.50064	0.40896				0.0675493	3.04284
	202.163	202.343	63.937	6.97712	20.3232	3.21236	0.49932				0.0715654	2.91284
	202.164	202.344	63.938	7.04102	18.4103	5.76343	0.45834				0.0650957	2.61473
	202.165	202.345	63.939	6.99882	19.0068	4.02186	0.44658				0.0638079	2.71572
	202.166	202.346	63.94	6.36326	21.0264	2.85529	0.49992				0.0785634	3.30434
	202.167	202.347	63.941	8.85436	21.8773	2.05671	0.5115				0.0577682	2.47079
	202.168	202.348	63.942	7.68468	20.4969	2.3425	0.4962				0.0645701	2.66724
	202.169	202.349	63.943	6.44855	20.5508	1.87507	0.4902				0.0760171	3.18688
	202.17	202.35	63.944	7.54645	20.6137	2.54571	0.46722				0.0619126	2.73158
	202.171	202.351	63.945	7.05325	19.2738	3.68479	0.45468				0.0644639	2.73261
	202.172	202.352	63.946	8.32018	19.4529	2.67707	0.5022				0.0603593	2.33803
	202.173	202.353	63.947	6.12545	16.0805	2.23371	0.3372				0.055049	2.6252
	202.174	202.354	63.948	7.73306	19.2581	3.2665	0.47454				0.0613651	2.49036
	202.175	202.355	63.949	7.58441	19.9156	4.59486	0.49308				0.0650123	2.62586
	202.176	202.356	63.95	6.57598	18.8334	2.52471	0.44124				0.0670987	2.86396
	202.177	202.357	63.951	7.7751	20.3354	3.25007	0.46494				0.0597986	2.61545
	202.178	202.358	63.952	6.45745	21.4167	2.5375	0.50166				0.077687	3.31659
	202.179	202.359	63.953	6.75233	20.3837	1.50714	0.44826				0.066386	3.01877
	202.181	202.361	63.954	6.99665	22.4855	1.36886	0.55068				0.0787062	3.21375
	202.182	202.362	63.955	9.36259	26.3636	1.48429	0.6408				0.0684426	2.81585
	202.183	202.363	63.956	8.03811	25.0608	0.918571	0.59784				0.0743757	3.11775
	202.184	202.364	63.957	9.05569	27.0057	0.4515	0.5811				0.0641696	2.98218
	202.185	202.365	63.958	8.81968	26.3039	0.427857	0.57546				0.0652472	2.9824
	202.186	202.366	63.959	9.28387	26.273	0.4025	0.57402				0.0618298	2.82996
	202.187	202.367	63.96	9.20012	26.964	0.398786	0.58494				0.0635796	2.93084
		202.368	63.961	9.09175	26.9898	0.445214	0.58713				0.0645783	2.9686
	202.188	202.368	63.962	8.98338	27.0155	0.491643	0.58932				0.0656012	3.00728
	202.189	202.369	63.963	9.06607	24.8868	0.497286	0.55188				0.0608731	2.74505
	202.19	202.37	63.964	9.56801	25.3198	0.750643	0.55806				0.0583256	2.6463
	202.191	202.371	63.965	8.52311	22.8827	1.40793	0.51912				0.0609074	2.68479
	202.192	202.372	63.966	7.84916	21.1467	2.20679	0.48468				0.0617492	2.69413
	202.193	202.373	63.967	6.57874	18.9986	2.93779	0.44904				0.0682563	2.88787
	202.194	202.374	63.968	7.56349	19.283	2.941	0.46014				0.060837	2.54949
	202.195	202.375	63.969	6.56513	20.988	2.61579	0.48606				0.0740366	3.19688
	202.196	202.376	63.97	6.14149	18.8825	3.58671	0.46602				0.0758806	3.07459
	202.197	202.377	63.971	7.3899	20.3644	2.20943	0.48174				0.065189	2.75571
	202.198	202.378	63.972	7.48376	23.516	1.65543	0.5241				0.0700316	3.14227
	202.199	202.379	63.973	7.39054	22.1218	1.65493	0.51906				0.0702331	2.99326
	202.2	202.38	63.974	6.38042	20.6531	1.68557	0.5001				0.0783804	3.23695
	202.201	202.381	63.975	8.79639	23.0662	1.9775	0.55506				0.0631009	2.62223
	202.202	202.382	63.976	7.35041	20.4475	2.47043	0.47892				0.0651556	2.78182
	202.203	202.383	63.977	7.70379	18.6776	2.42336	0.4719				0.0612556	2.42447
	202.204	202.384	63.978	7.78262	20.8211	2.45464	0.4788				0.0615217	2.67534
	202.205	202.385	63.979	7.43993	22.03	2.40157	0.50634				0.0680571	2.96105
	202.206	202.386	63.98	7.71517	22.7577	1.41193	0.53508				0.0693543	2.94974
	202.207	202.387	63.981	7.07008	20.5149	1.96907	0.50148				0.0709299	2.90165
	202.208	202.388	63.982	7.37778	19.2319	2.52929	0.4674				0.0633524	2.60674
	202.209	202.389	63.983	6.60986	18.144	2.40943	0.43104				0.0652116	2.74498
	202.211	202.391	63.984	8.24225	19.5038	2.79207	0.45426				0.0551136	2.36632
	202.212	202.392	63.985	9.02811	20.942	3.4155	0.51138				0.0566431	2.31964
	202.213	202.393	63.986	6.5799	20.0253	2.94621	0.48744				0.0740802	3.0434
	202.214	202.394	63.987	5.80532	18.5149	3.64093	0.44916				0.0773704	3.18929
	202.215	202.395	63.988	7.07098	21.7026	2.95479	0.49836				0.0704796	3.06924
	202.216	202.396	63.989	6.75508	18.8273	5.07921	0.48744				0.072159	2.78713
	202.217	202.397	63.99	5.84704	13.8443	7.81993	0.345				0.0590043	2.36774
		202.398	63.991	6.06637	16.1491	5.96061	0.40275				0.0663906	2.66208
	202.218	202.398	63.992	6.28571	18.454	4.10129	0.4605				0.0732615	2.93587
	202.219	202.399	63.993	7.19629	19.698	2.80264	0.47976				0.0666676	2.73725
	202.22	202.4	63.994	6.5196	16.4101	3.97279	0.46008				0.0705687	2.51704
	202.221	202.401	63.995	6.52008	18.243	5.45593	0.44994				0.0690084	2.79798
	202.222	202.402	63.996	7.46301	16.0442	8.3765	0.43032				0.0576604	2.14983
	202.223	202.403	63.997	5.27178	14.7122	6.25907	0.4107				0.0779054	2.79075
	202.224	202.404	63.998	7.33219	16.4722	7.87693	0.4551				0.0620687	2.24655
	202.225	202.405	63.999	5.44484	11.689	11.1239	0.29772				0.0546793	2.14681
	202.226	202.406	64	6.79235	15.577	6.96871	0.4368				0.0643076	2.29331
	202.227	202.407	64.001	7.54862	17.0545	6.67379	0.44946				0.059542	2.25928
	202.228	202.408	64.002	5.44892	15.1865	5.66021	0.4086				0.0749874	2.78707
	202.229	202.409	64.003	7.12795	18.2697	4.991	0.49458				0.069386	2.56311
	202.23	202.41	64.004	5.76651	17.5161	3.3925	0.44418				0.0770275	3.03756
	202.231	202.411	64.005	6.84164	18.115	3.42636	0.44382				0.0648704	2.64775
	202.232	202.412	64.006	6.20889	16.5005	3.55836	0.4512				0.07267	2.65756
	202.233	202.413	64.007	5.19655	16.0824	4.04871	0.4101				0.0789178	3.09482
	202.234	202.414	64.008	5.00739	14.6548	3.81879	0.38952				0.0777891	2.92664
	202.235	202.415	64.009	4.30211	14.0723	3.71486	0.35568				0.0826758	3.27102
	202.236	202.416	64.01	6.33436	15.6933	5.39	0.44166				0.0697245	2.47749
	202.237	202.417	64.011	5.48539	15.3351	4.535	0.41058				0.0748497	2.79563
	202.238	202.418	64.012	6.29561	16.8975	4.34879	0.43698				0.0694103	2.68401
	202.239	202.419	64.013	5.49185	13.8292	4.61864	0.37134				0.0676165	2.51814
	202.24	202.42	64.014	5.53394	12.9623	3.08443	0.33054				0.0597296	2.34233
	202.242	202.422	64.015	4.94831	14.0832	2.95457	0.33402				0.0675019	2.84607
	202.243	202.423	64.016	6.47254	16.4278	2.4155	0.37944				0.0586231	2.53808
	202.244	202.424	64.017	6.11942	14.053	2.70843	0.32124				0.0524952	2.29646
	202.245	202.425	64.018	6.25553	13.7335	2.99686	0.34176				0.0546333	2.19542
	202.246	202.426	64.019	4.99468	12.0381	2.24821	0.27162				0.0543818	2.41019
	202.247	202.427	64.02	4.3452	11.8359	2.59607	0.2925				0.0673157	2.72391
		202.428	64.021	5.4958	12.9903	3.45721	0.34023				0.0619073	2.36368
	202.248	202.428	64.022	6.64639	14.1447	4.31836	0.38796				0.0583715	2.12817
	202.249	202.429	64.023	4.34319	12.6689	3.7215	0.3228				0.0743233	2.91696
	202.25	202.43	64.024	5.18977	12.1224	5.98457	0.30054				0.0579101	2.33582
	202.251	202.431	64.025	5.37581	15.0162	4.28586	0.38358				0.071353	2.79329
	202.252	202.432	64.026	5.53315	13.4059	3.09579	0.33834				0.0611478	2.42283
	202.253	202.433	64.027	5.06234	10.1479	5.60457	0.26826				0.0529913	2.0046
	202.254	202.434	64.028	5.96123	12.9769	4.37429	0.31938				0.0535762	2.17688
	202.255	202.435	64.029	5.91464	14.3002	2.98207	0.32562				0.0550532	2.41776
	202.256	202.436	64.03	6.25611	14.8039	4.4315	0.38592				0.0616869	2.36631
	202.257	202.437	64.031	6.54422	15.0968	4.2235	0.37428				0.0571925	2.30689
	202.258	202.438	64.032	7.06924	17.6252	4.06343	0.4221				0.0597094	2.49323
	202.259	202.439	64.033	6.08628	14.6025	3.57443	0.36678				0.0602634	2.39924
	202.26	202.44	64.034	7.11688	16.2089	4.83371	0.40608				0.0570587	2.27752
	202.261	202.441	64.035	6.02365	13.0383	3.64564	0.30348				0.0503814	2.16452
	202.262	202.442	64.036	5.51742	15.1577	4.79807	0.39696				0.0719466	2.74724
	202.263	202.443	64.037	6.50404	16.5907	4.93493	0.42258				0.064972	2.55082
	202.264	202.444	64.038	7.53252	18.1494	3.90321	0.44832				0.0595179	2.40947
	202.265	202.445	64.039	7.55206	19.1256	4.37886	0.4713				0.0624068	2.5325
	202.266	202.446	64.04	7.59499	16.8802	4.49521	0.46728				0.0615247	2.22254
	202.267	202.447	64.041	6.40424	18.7424	2.73121	0.43536				0.06798	2.92655
	202.268	202.448	64.042	7.06129	20.0267	2.55179	0.46218				0.0654526	2.83612
	202.269	202.449	64.043	6.15298	20.0549	2.53021	0.4437				0.0721114	3.25937
	202.27	202.45	64.044	7.83334	20.6133	2.95293	0.48024				0.0613072	2.63148
	202.272	202.452	64.045	7.34178	19.3654	3.0785	0.44454				0.0605494	2.63769
	202.273	202.453	64.046	6.534	15.6087	3.26057	0.4035				0.0617539	2.38884
	202.274	202.454	64.047	7.32838	20.4355	3.8355	0.4746				0.0647619	2.78854
	202.275	202.455	64.048	7.36539	21.0819	2.62857	0.4716				0.0640292	2.86229
	202.276	202.456	64.049	8.66764	22.5259	2.93114	0.4983				0.0574897	2.59885
	202.277	202.457	64.05	7.50457	17.5902	2.36264	0.38508				0.0513127	2.34393
	202.278	202.458	64.051	8.17671	21.8616	3.54921	0.51204				0.0626217	2.67364
		202.459	64.052	8.05815	21.2433	3.57504	0.5025				0.0623592	2.63625
	202.279	202.459	64.053	7.93959	20.625	3.60086	0.49296				0.0620889	2.59774
	202.28	202.46	64.054	5.83946	16.7453	3.82986	0.38562				0.0660369	2.86761
	202.281	202.461	64.055	7.74911	20.9917	3.62157	0.49038				0.0632821	2.70892
	202.282	202.462	64.056	8.69008	23.7664	2.89893	0.53868				0.0619879	2.73489
	202.283	202.463	64.057	7.48594	22.8821	2.83136	0.51768				0.0691537	3.05667
	202.284	202.464	64.058	7.53099	22.4709	2.09286	0.51726				0.0686842	2.9838
	202.285	202.465	64.059	7.89634	22.5449	2.31757	0.50148				0.0635079	2.8551
	202.286	202.466	64.06	6.57429	19.3919	2.87836	0.41598				0.0632738	2.94966
	202.287	202.467	64.061	8.69273	23.8991	1.74343	0.51606				0.0593669	2.74932
	202.288	202.468	64.062	8.54058	23.9149	1.66786	0.54132				0.0633821	2.80015
	202.289	202.469	64.063	8.96363	23.1741	1.27271	0.52494				0.0585633	2.58534
	202.29	202.47	64.064	8.60887	24.7669	0.766786	0.5331				0.0619245	2.8769
	202.291	202.471	64.065	9.12049	26.908	0.630786	0.57096				0.0626019	2.95028
	202.292	202.472	64.066	9.30648	26.3698	0.815429	0.56496				0.0607061	2.83349
	202.293	202.473	64.067	8.77055	24.3504	0.807357	0.5406				0.0616381	2.77639
	202.294	202.474	64.068	9.04855	26.5874	0.644929	0.56976				0.062967	2.9383
	202.295	202.475	64.069	8.15119	25.061	0.704143	0.55956				0.0686476	3.07452
	202.296	202.476	64.07	8.20429	23.4964	0.414214	0.52644				0.0641664	2.86392
	202.297	202.477	64.071	9.45191	24.6088	0.317	0.53682				0.0567949	2.60358
	202.298	202.478	64.072	8.78066	22.7824	0.301429	0.52104				0.0593395	2.59461
	202.299	202.479	64.073	7.24722	22.7744	0.357143	0.52914				0.0730128	3.1425
	202.3	202.48	64.074	7.11604	22.0724	0.489	0.47184				0.0663066	3.10178
	202.302	202.482	64.075	7.48758	20.9553	1.16864	0.47766				0.0637937	2.79868
	202.303	202.483	64.076	7.42124	19.8817	1.11936	0.46632				0.0628359	2.67902
	202.304	202.484	64.077	6.70521	19.908	1.09136	0.4821				0.0718993	2.96903
	202.305	202.485	64.078	6.99184	21.1016	0.650357	0.44772				0.0640347	3.01804
	202.306	202.486	64.079	7.97098	22.5056	0.389143	0.52482				0.0658413	2.82344
	202.307	202.487	64.08	8.09852	25.6654	0.769143	0.59946				0.074021	3.16914
	202.308	202.488	64.081	8.73365	28.3778	1.08743	0.6789				0.0777338	3.24925
		202.488	64.082	8.57917	27.1335	0.996929	0.6462				0.075322	3.16271
	202.309	202.489	64.083	8.42469	25.8891	0.906429	0.6135				0.0728217	3.07301
	202.31	202.49	64.084	9.09842	27.0543	0.306429	0.60864				0.0668951	2.97352
	202.311	202.491	64.085	9.07062	27.6947	0.322571	0.59952				0.0660947	3.05323
	202.312	202.492	64.086	10.7664	28.4853	0.329357	0.63948				0.059396	2.64576
	202.313	202.493	64.087	8.36614	27.3614	0.351214	0.58722				0.0701901	3.2705
	202.314	202.494	64.088	9.78919	27.8985	0.395214	0.61206				0.062524	2.84993
	202.315	202.495	64.089	9.78454	27.8877	0.600143	0.63018				0.0644057	2.85018
	202.316	202.496	64.09	8.20519	23.0599	1.34964	0.50958				0.0621046	2.8104
	202.317	202.497	64.091	10.3679	26.1492	1.92279	0.59406				0.057298	2.52214
	202.318	202.498	64.092	9.31733	25.1284	1.80929	0.58386				0.0626639	2.69695
	202.319	202.499	64.093	7.11265	24.4291	1.26257	0.54138				0.0761151	3.4346
	202.32	202.5	64.094	7.97278	23.152	1.69779	0.53922				0.0676326	2.90388
	202.321	202.501	64.095	7.27332	22.1858	2.31757	0.54576				0.0750358	3.0503
	202.322	202.502	64.096	8.04796	18.4543	7.97757	0.47022				0.0584272	2.29305
	202.323	202.503	64.097	8.61305	22.7186	3.68936	0.54762				0.0635802	2.63769
	202.324	202.504	64.098	7.82137	22.1196	1.449	0.51966				0.066441	2.8281
	202.325	202.505	64.099	7.85038	19.2343	0.828643	0.47394				0.0603716	2.45011
	202.326	202.506	64.1	6.71628	21.5781	1.30414	0.52446				0.0780879	3.2128
	202.327	202.507	64.101	6.43585	19.1695	1.33886	0.48078				0.0747035	2.97855
	202.328	202.508	64.102	7.54936	22.0591	1.40164	0.54786				0.0725704	2.92199
	202.329	202.509	64.103	6.74201	20.6164	1.64779	0.4866				0.0721744	3.05791
	202.33	202.51	64.104	7.17051	19.5958	1.71914	0.4248				0.0592426	2.73283
	202.332	202.512	64.105	6.79585	21.6133	1.65164	0.5103				0.07509	3.18037
	202.333	202.513	64.106	9.23035	22.5952	1.86693	0.55704				0.0603488	2.44793
	202.334	202.514	64.107	7.82222	20.7415	2.46521	0.5124				0.0655057	2.65162
	202.335	202.515	64.108	7.69918	20.6568	3.32721	0.5328				0.0692022	2.68298
	202.336	202.516	64.109	6.85218	20.4017	3.60879	0.5304				0.0774061	2.9774
[truncated: 29,502 more rows]

## Sheet: Composite core (100% Anth.)
GR + Resistivity Albjära-1					Original Depth (m)	GR Corr. Depth (m)	Al (%)	Si (%)	Ca (%)	Ti (%)	K(%)	Zr (ppm)
depth (m) below surface	Gamma ray (Cps)	Resitivity (ohm.m.)		Zhao's data	200	200.18	9.08402	25.9676	3.47586	0.58932				GR = reference
200	666.164	262.858			200.001	200.181	9.20758	25.2069	3.19586	0.5244				Zhao + 0.18 = GR
200.05	668.031	258.851			200.002	200.182	7.75228	24.7339	3.72964	0.53724				This study = GR + 0.18
200.1	667.04	261.853			200.003	200.183	8.77431	24.4577	5.77071	0.52758
200.15	663.563	244.425			200.005	200.185	9.16846	24.8193	5.30157	0.50436				GR Corr. Depth = Depth corrected based on GR
200.2	654.594	242.429			200.006	200.186	9.32008	24.5875	6.06457	0.54042
200.25	634.675	218.861			200.007	200.187	7.68039	21.9865	5.40743	0.47268
200.3	600.734	200.426			200.008	200.188	6.77006	21.0671	3.78014	0.45222
200.35	559.109	183.574			200.009	200.189	8.76526	25.3097	3.09721	0.54696
200.4	510.207	160.005			200.011	200.191	8.17984	22.4943	3.84729	0.52638
200.45	456.571	131.433			200.012	200.192	7.48144	22.1161	5.17964	0.48852
200.5	406.319	127.43			200.013	200.193	7.74016	21.9651	5.77593	0.48336
200.55	367.705	120.283			200.014	200.194	7.8372	22.0974	4.87179	0.47106
200.6	349.612	119.997			200.016	200.196	7.15103	22.3895	3.26014	0.48702
200.65	352.18	132.285			200.017	200.197	9.02975	24.4183	5.25414	0.531
200.7	374.03	144.567			200.018	200.198	7.43734	22.0979	3.38057	0.5163
200.75	414.035	164.998			200.019	200.199	8.44428	24.1422	3.54593	0.55374
200.8	466.246	175.288			200.02	200.2	7.00195	24.8112	2.57793	0.55758
200.85	519.775	190.576			200.022	200.202	7.9947	24.0146	3.66057	0.53124
200.9	565.398	207.866			200.023	200.203	6.96997	24.0658	3.60814	0.53142
200.95	601.405	218.006			200.024	200.204	6.64925	18.671	3.44207	0.46434
201	629.87	226.148			200.025	200.205	7.15696	19.2691	2.81157	0.4677
201.05	650.071	233.296			200.027	200.207	6.92603	18.2802	3.51714	0.46392
201.1	663.462	239.434			200.028	200.208	6.20624	19.5426	3.00214	0.45306
201.15	671.484	252.714			200.029	200.209	8.22378	20.5756	3.42743	0.4881
201.2	680.395	254.867			200.03	200.21	6.92222	21.6242	3.04257	0.4908
201.25	692.153	241.59			200.031	200.211	8.31854	23.7378	2.65279	0.53436
201.3	705.248	243.735			200.033	200.213	7.65921	20.7902	2.63464	0.50472
201.35	718.261	246.734			200.034	200.214	8.01154	19.8111	4.09257	0.4707
201.4	735.208	257.446			200.035	200.215	6.58191	18.2581	2.11079	0.44022
201.45	757.298	257.444			200.036	200.216	6.28316	18.7624	2.90907	0.45018
201.5	789.635	271.723			200.038	200.218	5.97102	17.3476	2.10257	0.40434
201.55	823.192	285.998			200.039	200.219	6.6042	17.2485	2.51321	0.43218
201.6	856.246	314.558			200.04	200.22	5.6799	17.253	2.20836	0.40062
201.65	893.181	326.696			200.041	200.221	6.84715	18.1634	2.67564	0.46002
201.7	938.772	334.826			200.042	200.222	6.36194	18.2247	2.04	0.42684
201.75	982.981	351.824			200.044	200.224	6.09506	17.6265	1.54729	0.38616
201.8	1017.06	374.26			200.045	200.225	6.23721	18.1762	2.48164	0.4146
201.85	1042.15	380.411			200.046	200.226	4.84264	18.001	2.10164	0.40722
201.9	1063.2	390.556			200.047	200.227	5.31688	15.854	2.5405	0.34128
201.95	1079.02	381.119			200.049	200.229	5.37199	16.3793	1.58486	0.36108
202	1087.33	387.261			200.05	200.23	4.3056	17.3657	1.62871	0.3606
202.05	1086.59	407.271			200.051	200.231	6.80331	18.2288	1.58571	0.38916
202.1	1083.2	391.702			200.052	200.232	5.10866	16.3397	1.4155	0.37254
202.15	1081.73	384.125			200.053	200.233	6.47725	20.0376	0.799929	0.40794
202.2	1075.07	377.978			200.055	200.235	5.13418	18.9091	0.562857	0.37434
202.25	1063.33	376.688			200.056	200.236	7.27714	21.1315	1.5785	0.44526
202.3	1053.16	371.839			200.057	200.237	6.34939	18.9648	1.75071	0.40962
202.35	1041.62	356.13			200.058	200.238	7.73116	20.5438	1.52671	0.42084
202.4	1026.11	344.282			200.06	200.24	4.02316	15.4992	1.52007	0.33642
202.45	1010.36	342.286			200.061	200.241	7.04303	17.7045	1.24143	0.38922
202.5	991.72	333.576			200.062	200.242	6.26808	16.1584	1.65971	0.3525
202.55	977.707	332.578			200.063	200.243	5.05525	15.5319	2.64521	0.35382
202.6	974.475	321.583			200.065	200.245	5.47031	15.855	1.95671	0.36528
202.65	973.248	341.014			200.066	200.246	6.38767	17.4456	2.5195	0.36876
202.7	972.483	341.432			200.067	200.247	5.10035	16.4599	1.47971	0.3585
202.75	978.212	342.568			200.068	200.248	6.45051	15.3301	1.50657	0.32022
202.8	988.259	349.709			200.069	200.249	4.29496	14.6351	2.42843	0.31998
202.85	1007.85	360.134			200.071	200.251	8.94584	26.898	3.36807	0.62232
202.9	1025.02	361.134			200.072	200.252	8.99179	24.9708	4.66693	0.60132
202.95	1033.54	366.267			200.073	200.253	8.68823	24.2099	4.60586	0.5643
203	1040.7	390.67			200.074	200.254	7.23934	25.6865	3.28421	0.5418
203.05	1054.58	423.386			200.076	200.256	7.72205	26.1933	3.332	0.58818
203.1	1072.19	413.102			200.077	200.257	7.94006	24.4571	3.51136	0.53358
203.15	1085.96	401.809			200.078	200.258	6.73274	24.2977	2.91714	0.5331
203.2	1093.15	408.107			200.079	200.259	7.54735	23.1669	4.00264	0.52464
203.25	1102.77	418.25			200.08	200.26	8.29414	23.7934	4.02779	0.49068
203.3	1119.44	416.261			200.082	200.262	8.02016	24.5213	3.68993	0.53328
203.35	1134.17	379.143			200.083	200.263	8.08994	24.786	3.61129	0.51912
203.4	1140.99	377.298			200.084	200.264	7.64232	22.7605	3.65221	0.49692
203.45	1145.6	396.737			200.085	200.265	8.45423	22.5914	4.53907	0.50766
203.5	1149.4	412.027			200.087	200.267	6.69023	20.8817	4.25593	0.4974
203.55	1151.19	412.583			200.088	200.268	8.53989	25.0227	2.51771	0.519
203.6	1150.41	405.442			200.089	200.269	9.51983	25.5789	3.24029	0.552
203.65	1145.17	427.584			200.09	200.27	8.47218	27.3847	2.49964	0.57192
203.7	1137.52	447.167			200.091	200.271	8.01058	25.5791	3.13143	0.47004
203.75	1131.36	431.159			200.093	200.273	7.88628	27.7827	2.89143	0.51852
203.8	1121.28	421			200.094	200.274	8.46	26.8665	2.97414	0.53412
203.85	1111.16	413.858			200.095	200.275	9.23469	28.0777	2.348	0.5718
203.9	1099.04	405.29			200.096	200.276	7.96574	25.5958	2.0735	0.53496
203.95	1079.86	390.992			200.098	200.278	8.73085	27.3075	2.6875	0.56262
204	1058.63	366.703			200.099	200.279	7.96394	27.1799	2.35593	0.54198
204.05	1038.78	354.686			200.1	200.28	4.26727	12.9043	1.94014	0.35982
204.1	1017.75	352.831			200.101	200.281	6.42145	15.1698	2.40479	0.4428
204.15	988.119	350.692			200.102	200.282	6.10682	15.4442	2.612	0.41496
204.2	960.224	343.539			200.103	200.283	5.27188	15.537	2.69093	0.41232
204.25	936.106	328.259			200.104	200.284	5.89304	16.3541	2.83764	0.44646
204.3	917.865	325.133			200.105	200.285	5.42531	16.7039	2.76179	0.42756
204.35	898.222	313.707			200.107	200.287	6.14118	17.0441	2.63036	0.46512
204.4	865.775	289.998			200.108	200.288	6.00755	18.5485	2.30164	0.50382
204.45	820.516	270.429			200.109	200.289	6.70341	19.723	3.61593	0.50886
204.5	771.341	236.857			200.11	200.29	6.87976	19.2108	3.20021	0.50742
204.55	716.004	217.583			200.111	200.291	7.5879	18.8606	3.85171	0.51666
204.6	668.711	214.006			200.112	200.292	7.86928	21.4733	3.3565	0.56658
204.65	635.995	214.141			200.113	200.293	6.96007	19.9665	2.91643	0.54078
204.7	622.496	216.431			200.114	200.294	7.54496	21.5603	3.41286	0.57072
204.75	638.828	236.14			200.115	200.295	5.77091	18.1672	2.56036	0.49716
204.8	684.041	248.858			200.116	200.296	6.2154	17.081	2.24429	0.49134
204.85	750.183	270.147			200.118	200.298	5.67625	17.1514	2.43343	0.49146
204.9	824.263	303.715			200.119	200.299	7.49372	17.6069	2.93093	0.50772
204.95	894.307	324.291			200.12	200.3	6.93402	17.5546	3.21336	0.4881
205	953.724	333.442			200.121	200.301	6.85705	19.0358	3.40064	0.4944
205.05	997.674	343.721			200.122	200.302	7.05346	17.7614	2.69314	0.48252
205.1	1025.63	341.583			200.123	200.303	6.49292	17.5453	2.98857	0.4911
205.15	1035.36	337.429			200.124	200.304	6.10094	17.6983	3.39007	0.48162
205.2	1035.62	358.868			200.125	200.305	7.1748	19.3004	2.74371	0.51714
205.25	1029.74	353.865			200.126	200.306	6.71363	20.5715	2.63086	0.52068
205.3	1022.41	343.153			200.127	200.307	6.92063	21.9858	2.82907	0.55044
205.35	1011.96	350.29			200.128	200.308	7.26898	20.203	2.87457	0.522
205.4	998.933	344.863			200.13	200.31	7.86431	20.2939	3.77829	0.53376
205.45	984.538	340.865			200.131	200.311	7.85568	19.1617	3.65893	0.50184
205.5	970.338	352.155			200.132	200.312	5.49646	18.8575	2.91536	0.46578
205.55	949.605	337.14			200.133	200.313	6.21159	17.906	2.59093	0.4626
205.6	924.402	315.716			200.134	200.314	6.53014	18.396	2.72021	0.5094
205.65	883.405	300.712			200.135	200.315	6.40519	19.356	3.13821	0.49032
205.7	825.561	265.572			200.136	200.316	7.62766	21.8698	3.5895	0.53586
205.75	756.27	237.293			200.137	200.317	8.58203	25.8075	3.43979	0.56844
205.8	684.264	211.292			200.138	200.318	8.51331	26.5185	3.87614	0.5805
205.85	613.293	177.579			200.139	200.319	8.77373	25.1292	4.01571	0.5901
205.9	554.467	162.012			200.14	200.32	7.62681	21.8396	3.60771	0.54132
205.95	519.998	175.294			200.142	200.322	8.06426	20.6394	3.89121	0.53802
206	521.213	183.157			200.143	200.323	7.77293	19.9491	4.24743	0.51756
206.05	558.592	223.44			200.144	200.324	5.28718	16.7834	4.48186	0.45084
206.1	623.82	261.149			200.145	200.325	4.60927	15.1123	5.24864	0.42852
206.15	703.568	287.857			200.146	200.326	7.20302	16.8695	4.73564	0.47928
206.2	793.838	324.862			200.147	200.327	4.84984	15.7291	4.71893	0.43848
206.25	880.074	340.44			200.148	200.328	5.72178	15.2781	4.17964	0.42798
206.3	946.397	356.725			200.149	200.329	5.83496	15.8974	4.25236	0.41742
206.35	990.829	369.288			200.15	200.33	5.0661	13.7535	3.43107	0.37398
206.4	1014.97	357.573			200.151	200.331	4.03528	10.4711	2.29886	0.28056
206.45	1021.01	340.281			200.153	200.333	5.73729	11.9634	2.95721	0.33756
206.5	1016.41	347.715			200.154	200.334	4.69636	14.9582	2.63279	0.39294
206.55	1005.03	338.281			200.155	200.335	6.39937	15.9031	2.78729	0.41136
206.6	990.867	331.846			200.156	200.336	5.66486	15.0611	2.58664	0.36804
206.65	980.026	324.708			200.157	200.337	5.36453	16.6556	2.68636	0.37494
206.7	971.749	321.996			200.158	200.338	6.19264	15.6672	1.79779	0.39078
206.75	968.781	337.702			200.159	200.339	6.72316	19.9535	2.01057	0.4617
206.8	967.527	343.855			200.16	200.34	6.72877	18.7356	2.25129	0.43512
206.85	968.286	347.999			200.161	200.341	5.09066	14.5336	2.2005	0.37998
206.9	968.661	342.856			200.162	200.342	6.4845	16.2449	1.86836	0.40842
206.95	970.833	338.562			200.163	200.343	6.9219	17.1582	1.86421	0.43008
207	973.759	327.562			200.165	200.345	6.32044	17.4474	2.54421	0.44502
207.05	974.313	318.991			200.166	200.346	8.32029	17.8311	3.00643	0.45354
207.1	971.823	307.856			200.167	200.347	6.66228	18.0789	2.8355	0.4506
207.15	973.053	302.705			200.168	200.348	6.14012	17.2288	2.65064	0.42696
207.2	976.299	291.128			200.169	200.349	4.53579	12.1278	2.89614	0.34758
207.25	983.088	293.283			200.17	200.35	4.72114	10.4588	3.10836	0.2913
207.3	987.35	299.579			200.171	200.351	5.11062	14.4094	3.08014	0.39564
207.35	990.201	327.863			200.172	200.352	5.1831	13.0097	2.3715	0.36072
207.4	994.1	348.009			200.173	200.353	7.89316	19.6936	4.19457	0.5178
207.45	997.943	337.998			200.174	200.354	8.03345	20.749	3.65236	0.5388
207.5	998.179	365.425			200.175	200.355	7.90136	23.2182	4.00671	0.5475
207.55	998.201	378.858			200.177	200.357	8.07131	22.8084	4.74957	0.56046
207.6	998.246	393.988			200.178	200.358	8.44856	22.7355	3.47564	0.53748
207.65	999.882	385.982			200.179	200.359	9.35492	25.3212	3.38307	0.58872
207.7	1000.71	367.697			200.18	200.36	8.48711	25.8942	4.98257	0.58506
207.75	1000.56	368.548			200.181	200.361	7.20455	21.4571	4.267	0.50112
207.8	1004.06	367.703			200.182	200.362	8.26856	21.6475	4.58943	0.48402
207.85	1010.96	360.567			200.183	200.363	8.02361	21.6504	5.97314	0.50478
207.9	1020.1	363.283			200.184	200.364	9.39759	23.1175	6.46114	0.55008
207.95	1029.18	344.549			200.185	200.365	7.66085	21.8351	7.42307	0.50568
208	1038.41	361.84			200.186	200.366	6.48386	20.4827	8.34264	0.47934
208.05	1045.98	364.84			200.188	200.368	8.24675	22.0997	6.32221	0.53814
208.1	1053.68	358.127			200.189	200.369	6.58207	20.3788	6.35936	0.48588
208.15	1055.88	363.409			200.19	200.37	7.48932	21.1433	4.82771	0.4995
208.2	1055.76	358.982			200.191	200.371	7.49271	22.2979	4.17493	0.55236
208.25	1054.24	361.541			200.192	200.372	7.97718	24.2235	4.00357	0.57954
208.3	1050.69	376.705			200.193	200.373	8.06262	23.3954	4.67557	0.55326
208.35	1050.41	386.846			200.194	200.374	9.59797	23.0948	7.89257	0.5331
208.4	1052.84	382.842			200.195	200.375	8.26481	23.2778	6.19557	0.56544
208.45	1054.66	399.42			200.196	200.376	7.1019	22.1356	3.83707	0.54822
208.5	1060.9	402.144			200.197	200.377	7.68293	19.8528	3.05507	0.49932
208.55	1066.45	401.144			200.198	200.378	6.15198	19.3386	2.42943	0.50148
208.6	1067.82	388.871			200.2	200.38	7.03758	19.3054	2.19171	0.47694
208.65	1069.29	390.586			200.201	200.381	7.0947	20.2573	2.79129	0.49848
208.7	1063.69	381.441			200.202	200.382	7.60929	19.6198	3.09086	0.51858
208.75	1054.09	387.442			200.203	200.383	8.07242	23.3175	3.32636	0.5664
208.8	1041.76	367.861			200.204	200.384	7.76086	24.6389	3.48871	0.63918
208.85	1025.27	369.711			200.205	200.385	7.64396	21.231	3.40757	0.5991
208.9	1013.4	371.138			200.206	200.386	8.47059	23.2889	3.79964	0.61644
208.95	1004.89	364.993			200.207	200.387	6.28518	20.7369	3.671	0.56184
209	1000.09	377.553			200.208	200.388	7.36735	19.7482	4.571	0.52788
209.05	1001.51	372.411			200.209	200.389	7.46947	21.6189	3.78543	0.56058
209.1	1003.47	374.413			200.21	200.39	6.45326	19.4005	3.78964	0.52596
209.15	1006.2	382.557			200.212	200.392	8.44936	22.0425	4.08607	0.59232
209.2	1013.19	393.71			200.213	200.393	6.79722	20.3163	3.83	0.53346
209.25	1018.22	396.854			200.214	200.394	7.58467	20.1847	4.07171	0.56766
209.3	1021.65	407.999			200.215	200.395	6.72888	18.753	3.53007	0.534
209.35	1018.5	403.579			200.216	200.396	6.99258	21.1793	3.92764	0.58896
209.4	1008.58	411.867			200.217	200.397	8.33342	21.7868	3.71136	0.5832
209.45	1005.31	411.871			200.218	200.398	5.53246	18.2235	3.9525	0.49416
209.5	1008.66	395.448			200.219	200.399	6.36967	18.2105	3.82943	0.49368
209.55	1011.35	373.585			200.22	200.4	6.53278	19.2661	5.53929	0.52824
209.6	1014.7	351.013			200.221	200.401	6.60976	20.9021	4.46457	0.5742
209.65	1014.26	328.869			200.223	200.403	6.74868	19.2066	3.04271	0.52338
209.7	1006.96	317.155			200.224	200.404	7.35348	20.3661	3.418	0.52782
209.75	996.525	309			200.225	200.405	6.56211	17.9022	3.48186	0.47184
209.8	979.272	292.852			200.226	200.406	4.74528	12.6577	2.07979	0.37668
209.85	959.794	302.134			200.227	200.407	5.98564	14.0125	1.86236	0.38094
209.9	939.307	305.702			200.228	200.408	5.22185	13.4425	3.15629	0.3708
209.95	915.621	316.993			200.229	200.409	7.14891	18.8013	5.87121	0.51996
210	895.263	330.988			200.23	200.41	6.3117	17.0068	4.70964	0.45492
210.05	880.636	309.992			200.231	200.411	6.32774	17.3558	3.38093	0.46098
210.1	873.614	305.861			200.232	200.412	6.26707	17.3216	3.07943	0.44688
210.15	869.383	297.573			200.233	200.413	6.44601	15.9757	4.61871	0.44886
210.2	861.901	301.015			200.235	200.415	5.95572	16.5085	4.78093	0.44778
210.25	856.508	301.012			200.236	200.416	6.57355	17.3896	4.28521	0.47106
210.3	850.559	310.148			200.237	200.417	7.09385	19.6389	3.77264	0.48672
210.35	850.016	309.154			200.238	200.418	6.55428	20.6555	4.26921	0.50928
210.4	855.335	327.578			200.239	200.419	5.90289	17.0744	3.09543	0.42378
210.45	859.673	339.875			200.24	200.42	7.45237	18.3485	4.2875	0.45882
210.5	864.064	360.294			200.241	200.421	5.76455	16.3943	3.79607	0.41184
210.55	865.532	354.71			200.242	200.422	6.03312	16.5948	3.0455	0.4308
210.6	859.589	353.568			200.243	200.423	6.23245	16.3624	3.65479	0.42906
210.65	851.316	343.148			200.244	200.424	7.15055	17.4216	4.90729	0.45798
210.7	833.659	336.007			200.245	200.425	8.03134	17.4969	5.26979	0.47304
210.75	809.525	321.721			200.247	200.427	6.36739	17.1386	3.7035	0.44226
210.8	783.542	294.852			200.248	200.428	5.70632	16.9812	4.15843	0.46242
210.85	757.482	278.293			200.249	200.429	7.59282	18.9563	5.22086	0.50706
210.9	734.68	261.581			200.25	200.43	6.32716	18.2427	4.61271	0.44754
210.95	715.327	247.433			200.251	200.431	6.88728	16.6005	4.60679	0.46188
211	700.773	234.991			200.252	200.432	7.02757	17.5586	4.27621	0.45258
211.05	690.073	224.705			200.253	200.433	6.38291	17.2084	3.21636	0.4275
211.1	683.393	229.991			200.254	200.434	5.9337	17.5794	2.92164	0.44268
211.15	680.81	226.415			200.255	200.435	5.59514	15.6438	3.22486	0.43272
211.2	679.149	218.41			200.256	200.436	7.00316	17.4286	2.92343	0.44334
211.25	675.151	214.842			200.258	200.438	5.56581	17.226	2.162	0.45444
211.3	673.602	216.849			200.259	200.439	7.23711	19.2774	5.19871	0.48012
211.35	672.808	223			200.26	200.44	6.99506	18.7861	5.65693	0.4875
211.4	674.029	220.996			200.261	200.441	7.80972	18.1871	6.23057	0.50784
211.45	672.021	232.013			200.262	200.442	6.43045	16.6826	5.05814	0.46236
211.5	669.709	235.589			200.263	200.443	7.58292	18.3247	5.761	0.4866
211.55	665.307	240.88			200.264	200.444	7.64031	20.6189	5.62529	0.52962
211.6	665.249	247.018			200.265	200.445	7.54978	21.3752	5.23636	0.5148
211.65	664.057	244.159			200.266	200.446	8.00566	19.3361	6.28579	0.46836
211.7	659.809	239.726			200.267	200.447	6.95875	17.9197	13.726	0.43896
211.75	656.701	249.014			200.268	200.448	5.67439	10.7286	21.8471	0.21258
211.8	656.932	223.714			200.27	200.45	5.76598	10.2773	25.6927	0.1698
211.85	653.478	220.856			200.271	200.451	6.86504	9.38579	25.9999	0.17838
211.9	647.447	216.715			200.272	200.452	4.68418	9.25493	24.3779	0.15774
211.95	636.956	210.569			200.273	200.453	5.71045	9.74349	25.7798	0.17166
212	625.386	212.422			200.274	200.454	6.00776	9.71003	25.5623	0.1833
212.05	613.601	212.14			200.275	200.455	5.20068	9.29124	25.1241	0.1575
212.1	601.774	206.996			200.276	200.456	5.06351	9.71525	24.0937	0.1695
212.15	592.724	214.853			200.277	200.457	5.13371	9.49681	24.3589	0.14652
212.2	587.749	214.134			200.278	200.458	6.15653	10.1254	25.5644	0.17124
212.25	585.44	215.711			200.279	200.459	4.96668	9.68702	25.3557	0.16272
212.3	585.86	221.713			200.28	200.46	5.17468	9.30118	25.6459	0.16074
212.35	589.543	220.575			200.282	200.462	4.45484	8.64967	24.3841	0.16164
212.4	593.112	209.433			200.283	200.463	5.29115	8.75443	25.1936	0.15618
212.45	590.493	207.429			200.284	200.464	6.17358	10.0351	26.2329	0.16158
212.5	582.783	195.287			200.285	200.465	6.29873	8.75065	25.2442	0.15762
212.55	571.935	187.868			200.286	200.466	4.40179	9.17723	24.1616	0.16068
212.6	562.706	186.003			200.287	200.467	6.59393	10.3116	26.6432	0.17244
212.65	556.684	185.292			200.288	200.468	5.103	9.49662	25.6252	0.17724
212.7	547.363	187.296			200.289	200.469	5.75423	9.71567	25.2617	0.1599
212.75	540.889	188.011			200.29	200.47	4.56607	9.8826	25.3065	0.1656
212.8	539.089	172.733			200.291	200.471	6.52691	9.38303	26.6379	0.16326
212.85	539.055	183.874			200.293	200.473	5.90437	8.3741	24.7473	0.15108
212.9	540.14	191.008			200.294	200.474	5.51451	8.31922	25.3747	0.14652
212.95	542.168	181.147			200.295	200.475	4.64056	8.63002	24.8559	0.13794
213	543.925	172.282			200.296	200.476	6.23096	8.72653	26.1446	0.15396
213.05	549.327	170.276			200.297	200.477	4.60461	8.35385	24.4289	0.15042
213.1	555.089	178.704			200.298	200.478	6.23515	9.18083	26.1349	0.16584
213.15	560.837	191.837			200.299	200.479	6.03185	8.87572	26.116	0.16242
213.2	567.122	175.543			200.3	200.48	6.62781	9.55239	27.2175	0.15234
213.25	574.579	177.687			200.301	200.481	5.04016	8.4154	25.1875	0.14604
213.3	580.846	190.831			200.302	200.482	5.1723	9.26487	25.9286	0.1575
213.35	586.524	196.979			200.303	200.483	6.19846	8.89905	25.9389	0.16818
213.4	591.387	197.121			200.305	200.485	5.91586	9.71824	25.9526	0.15786
213.45	596.123	195.832			200.306	200.486	5.95747	10.3269	26.8222	0.17436
213.5	602.838	203.123			200.307	200.487	4.97769	9.60615	25.2076	0.16362
213.55	610.495	220.558			200.308	200.488	5.57434	9.05828	24.9184	0.15816
213.6	620.787	219.418			200.309	200.489	5.50228	9.08852	25.4158	0.16116
213.65	631.407	219.421			200.31	200.49	5.01379	8.99915	25.6928	0.15696
213.7	643.038	218.558			200.311	200.491	5.50334	8.13083	24.3899	0.1494
213.75	655.013	216.846			200.312	200.492	4.52541	9.10821	24.9552	0.15858
213.8	666.335	217.139			200.313	200.493	6.54141	9.34038	26.6652	0.1716
213.85	671.838	218.996			200.314	200.494	6.47063	9.75277	26.6003	0.1647
213.9	666.114	206.709			200.315	200.495	6.80246	10.2095	27.2804	0.17256
213.95	646.172	199.566			200.317	200.497	6.0876	8.8025	26.4756	0.16266
214	615.138	190.416			200.318	200.498	5.01877	8.24731	26.0236	0.13122
214.05	572.518	178.851			200.319	200.499	5.62384	8.36999	25.4169	0.13044
214.1	521.286	166.136			200.32	200.5	5.59853	8.24353	25.8178	0.13842
214.15	465.508	145.703			200.321	200.501	6.17649	7.92069	26.2318	0.13302
214.2	407.127	122.277			200.322	200.502	5.77721	7.89189	25.7853	0.14496
214.25	352.557	109.993			200.323	200.503	6.10412	9.32447	26.1419	0.14964
214.3	305.127	94.7097			200.324	200.504	5.44447	9.01525	26.7501	0.14814
214.35	266.42	79.4323			200.325	200.505	5.65369	8.32916	25.4794	0.14364
214.4	236.893	64.287			200.326	200.506	7.17364	9.74293	27.594	0.16824
214.45	213.939	59.1466			200.328	200.508	6.12254	10.2466	27.4302	0.17844
214.5	195.834	55.1509			200.329	200.509	7.02408	9.56881	27.923	0.16518
214.55	185.9	52.7213			200.33	200.51	5.81675	9.02944	26.7322	0.1491
214.6	185.165	54.1512			200.331	200.511	6.3648	8.28739	26.9574	0.14748
214.65	190.594	60.7187			200.332	200.512	6.06108	9.38947	26.2166	0.17556
214.7	198.371	58.7193			200.333	200.513	6.53432	9.40632	27.3019	0.14346
214.75	204.271	69.4311			200.334	200.514	5.41562	9.52985	27.0774	0.14574
214.8	208.078	65.8587			200.335	200.515	5.59848	9.46045	26.8419	0.1518
214.85	207.232	65.8556			200.336	200.516	6.1911	8.87189	26.619	0.15972
214.9	203.515	62.2825			200.337	200.517	4.98918	8.07371	26.0752	0.13176
214.95	200.39	63.8554			200.338	200.518	6.23239	8.59381	26.9012	0.1338
215	203.675	76.7094			200.34	200.52	5.35018	9.04969	26.1561	0.15468
215.05	222.463	90.9967			200.341	200.521	6.28703	8.72233	26.8668	0.14712
215.1	258.619	100.143			200.342	200.522	5.10099	9.53759	26.988	0.1524
215.15	307.86	125.14			200.343	200.523	5.49826	9.08581	26.6172	0.14904
215.2	368.673	141.273			200.344	200.524	4.85486	8.16933	25.9047	0.1302
215.25	434.207	171.555			200.345	200.525	5.16611	8.33313	25.6271	0.14934
215.3	498.543	187.981			200.346	200.526	6.31742	8.81529	27.1859	0.14724
215.35	554.132	205.414			200.347	200.527	5.535	8.65149	26.0494	0.15834
215.4	593.767	220.553			200.348	200.528	5.66915	8.86704	26.2224	0.15366
215.45	616.744	231.843			200.349	200.529	6.02524	8.13181	26.1541	0.13908
215.5	628.012	221.993			200.35	200.53	5.89955	9.42536	26.6696	0.16164
215.55	630.701	230.005			200.352	200.532	5.44722	8.29607	26.6063	0.13182
215.6	628.763	222.153			200.353	200.533	6.07876	9.08735	27.3992	0.15096
215.65	624.693	225.584			200.354	200.534	5.6151	8.60137	25.5096	0.15822
215.7	620.159	221.445			200.355	200.535	7.03498	10.0286	26.7073	0.18054
215.75	616.371	222.586			200.356	200.536	5.88071	8.68597	25.7371	0.1455
215.8	615.163	222.438			200.357	200.537	5.6619	9.02977	26.8702	0.13962
215.85	613.432	230.432			200.358	200.538	6.34315	10.7599	28.4171	0.15432
215.9	611.349	226.859			200.359	200.539	5.23075	9.18587	25.7893	0.14682
215.95	611.18	221.275			200.36	200.54	7.04753	9.09174	27.5441	0.15804
216	613.628	228.409			200.361	200.541	5.58365	9.01068	26.8724	0.14052
216.05	616.521	217.119			200.363	200.543	5.01432	7.3129	24.9681	0.1377
216.1	619.752	224.266			200.364	200.544	5.72855	8.05159	25.636	0.13836
216.15	624.238	215.122			200.365	200.545	5.61462	8.74412	26.2571	0.14556
216.2	633.17	222.264			200.366	200.546	7.56519	9.25316	27.9021	0.16302
216.25	645.753	226.698			200.367	200.547	5.76344	8.22103	25.9896	0.13728
216.3	656.67	243.424			200.368	200.548	6.47185	7.41715	26.4367	0.12654
216.35	665.178	247.859			200.369	200.549	6.22922	8.76097	27.1101	0.14088
216.4	670.946	263.29			200.37	200.55	5.09861	7.76081	25.4636	0.13686
216.45	674.68	250.571			200.371	200.551	6.34378	7.54493	27.7523	0.11298
216.5	679.53	259.859			200.372	200.552	5.41662	6.77768	26.5546	0.10014
216.55	684.479	252.721			200.373	200.553	5.54315	7.98201	27.5114	0.12276
216.6	687.581	246.572			200.375	200.555	5.06663	7.27127	24.6899	0.12858
216.65	691.517	234.428			200.376	200.556	6.6654	8.71976	27.6046	0.13644
216.7	697.488	225.578			200.377	200.557	4.78731	8.58881	25.8733	0.1317
216.75	705.532	229.572			200.378	200.558	5.4144	7.70163	26.2655	0.11934
216.8	715.726	229.581			200.379	200.559	6.11778	8.92612	26.8775	0.16134
216.85	722.785	235.008			200.38	200.56	6.20158	8.01015	26.8454	0.14364
216.9	728.339	246.146			200.381	200.561	5.12365	7.59579	26.9532	0.11232
216.95	732.524	255.861			200.382	200.562	4.95376	7.8582	26.5958	0.12708
217	737.287	260.299			200.383	200.563	5.59133	7.83375	26.7719	0.1281
217.05	741.139	260.296			200.384	200.564	4.80081	8.24194	26.6916	0.12492
217.1	746.715	259.015			200.386	200.566	6.20751	8.8928	28.4119	0.12774
217.15	749.937	270.583			200.387	200.567	7.07829	8.94801	28.3477	0.14214
217.2	753.426	267.868			200.388	200.568	5.85127	8.58223	27.1959	0.13686
217.25	755.522	260.297			200.389	200.569	5.17643	8.18076	26.865	0.12576
217.3	762.298	263.298			200.39	200.57	6.50224	7.95559	27.7824	0.12894
217.35	771.225	274.862			200.391	200.571	5.27506	7.63901	26.4661	0.12312
217.4	773.35	277.43			200.392	200.572	5.34949	8.58755	27.6256	0.14058
217.45	771.403	268.574			200.393	200.573	6.79209	8.33966	28.6632	0.12924
217.5	771.415	265.577			200.394	200.574	6.15817	8.73511	28.9155	0.1365
217.55	770.372	263.862			200.395	200.575	5.71802	8.00459	27.4034	0.13452
217.6	769.576	263.862			200.396	200.576	5.38285	7.21943	26.2892	0.13716
217.65	762.255	275.007			200.398	200.578	8.00936	8.49805	30.6549	0.13926
217.7	749.369	261.002			200.399	200.579	5.11878	6.87302	26.8552	0.1158
217.75	740.578	255.293			200.4	200.58	6.50292	7.88895	28.9614	0.12054
217.8	734.581	249.865			200.401	200.581	5.86027	7.83099	28.6242	0.12102
217.85	731.047	242.719			200.402	200.582	4.76693	7.08307	26.5193	0.10272
217.9	735.111	247.146			200.403	200.583	5.63321	8.08593	27.9542	0.1398
217.95	740.043	258.858			200.404	200.584	5.29735	7.64965	27.0381	0.13044
218	747.594	250.14			200.405	200.585	6.50425	8.40266	29.1154	0.12852
218.05	759.742	273.996			200.406	200.586	5.40349	8.40817	28.0369	0.138
218.1	770.277	277.991			200.407	200.587	5.34785	8.20904	27.0108	0.14268
218.15	776.957	280.272			200.408	200.588	5.86043	8.1802	27.6081	0.12252
218.2	784.813	293.128			200.41	200.59	6.77695	7.92708	29.3288	0.11922
218.25	787.486	296.699			200.411	200.591	5.9733	7.51571	28.0009	0.13086
218.3	791.697	296.7			200.412	200.592	5.60594	6.9531	25.6038	0.13578
218.35	793.463	287.128			200.413	200.593	6.03958	8.18566	27.84	0.1395
218.4	790.42	280.851			200.414	200.594	4.27749	7.07537	24.9369	0.12264
218.45	790.1	280.85			200.415	200.595	5.94	7.49761	27.4951	0.12048
218.5	796.907	285.991			200.416	200.596	5.36966	7.66248	27.3965	0.10566
218.55	797.109	279.705			200.417	200.597	5.84227	7.90239	27.6918	0.11952
218.6	793.876	267.138			200.418	200.598	7.23065	7.75497	29.1911	0.11508
218.65	786.987	259.996			200.419	200.599	6.89771	8.64103	28.5011	0.14646
218.7	782.721	270.432			200.421	200.601	6.57069	7.112	27.8708	0.1182
218.75	777.47	260.004			200.422	200.602	7.59616	7.06491	28.874	0.1206
218.8	769.392	267.147			200.423	200.603	5.45601	8.16256	27.8979	0.10614
218.85	754.261	264.008			200.424	200.604	5.75968	7.58207	27.243	0.1251
218.9	741.684	270.295			200.425	200.605	5.98076	8.41885	28.1962	0.12942
218.95	731.218	273.868			200.426	200.606	6.38502	8.81673	29.4594	0.1221
219	724.115	275.584			200.427	200.607	5.14991	7.67125	28.015	0.11724
219.05	715.924	277.434			200.428	200.608	7.18507	7.57843	29.5257	0.11064
219.1	711.351	271.859			200.429	200.609	4.90759	6.70348	27.2501	0.10632
219.15	708.898	255.57			200.43	200.61	4.85767	6.47304	26.8799	0.1023
219.2	707.835	257.712			200.431	200.611	5.49132	7.02291	27.0837	0.10908
219.25	702.84	252.285			200.433	200.613	4.56877	6.44327	26.1116	0.10224
219.3	699.864	253.283			200.434	200.614	5.36638	6.91306	27.3772	0.11064
219.35	695.846	248.853			200.435	200.615	5.4441	7.02968	27.8929	0.11124
219.4	694.104	246.998			200.436	200.616	5.9589	7.60919	28.5513	0.1107
219.45	696.07	253.713			200.437	200.617	5.33753	7.03528	27.6849	0.10662
219.5	701.223	268.287			200.438	200.618	4.95217	7.59514	27.9703	0.10824
219.55	710.603	268.999			200.439	200.619	5.4126	7.18419	28.0257	0.11424
219.6	725.838	272.426			200.44	200.62	5.24229	6.85636	27.5235	0.10152
219.65	738.925	273.998			200.441	200.621	4.66952	6.59591	26.7403	0.09876
219.7	748.308	274.854			200.442	200.622	5.29062	7.39401	27.9374	0.09828
219.75	753.998	277.417			200.443	200.623	4.59619	7.19381	27.6121	0.10716
219.8	755.456	278.131			200.445	200.625	5.22588	6.43183	27.4632	0.09678
219.85	751.507	277.276			200.446	200.626	4.84714	5.98547	26.4589	0.08706
219.9	744.926	279.423			200.447	200.627	6.13673	6.38787	27.8521	0.09384
219.95	739.25	271.425			200.448	200.628	6.01396	7.44137	28.9078	0.1107
220	732.066	274.28			200.449	200.629	4.01961	6.0606	26.0401	0.09606
220.05	726.189	268.999			200.45	200.63	5.25674	5.97581	26.9008	0.08772
220.1	724.274	258.72			200.451	200.631	5.85889	6.96934	28.1474	0.09402
220.15	725.337	254.002			200.452	200.632	4.32985	7.14504	27.5134	0.1026
220.2	727.208	246.141			200.453	200.633	4.82966	6.96472	27.4664	0.10962
220.25	728.621	243.14			200.454	200.634	4.65877	6.42483	26.1995	0.0993
220.3	728.647	250.42			200.456	200.636	5.50879	7.40642	28.5886	0.10146
220.35	729.424	237.993			200.457	200.637	4.97848	7.29867	27.3267	0.1149
220.4	729.539	250.419			200.458	200.638	6.56645	7.85162	29.8104	0.11556
220.45	724.709	249.275			200.459	200.639	4.48539	7.79422	27.4986	0.11826
220.5	715.294	247.422			200.46	200.64	5.72628	8.74832	28.2164	0.13812
220.55	707.847	244.427			200.461	200.641	5.56952	7.56667	27.75	0.13452
220.6	699.025	237.283			200.462	200.642	5.92396	6.42572	27.8399	0.1011
220.65	687.525	225.715			200.463	200.643	5.41223	6.87036	28.8855	0.11172
220.7	676.359	217.562			200.464	200.644	6.28534	7.04573	29.1567	0.0912
220.75	667.434	213.845			200.465	200.645	5.50763	7.12731	28.9926	0.09882
220.8	665.131	217.416			200.466	200.646	5.77207	8.09699	29.6912	0.1017
220.85	666.868	226.273			200.468	200.648	6.18067	8.96121	28.8639	0.1419
220.9	671.918	223.556			200.469	200.649	5.76344	7.95205	28.0234	0.12636
220.95	682.138	236.134			200.47	200.65	6.22789	7.69337	27.3765	0.13404
221	697.609	244.134			200.471	200.651	6.98818	9.12151	28.8133	0.13572
221.05	717.07	268.289			200.472	200.652	5.86668	9.19245	27.4204	0.14292
221.1	739.935	270.576			200.473	200.653	4.23476	8.46477	24.6543	0.14274
221.15	766.079	276.865			200.474	200.654	4.54807	9.00387	25.6454	0.14454
221.2	789.148	280.436			200.475	200.655	6.0039	7.85279	26.2011	0.141
221.25	804.814	303.722			200.476	200.656	5.75614	8.09569	28.7858	0.10932
221.3	814.377	297.433			200.477	200.657	5.42382	7.42821	28.1427	0.10194
221.35	819.648	295.29			200.478	200.658	4.74612	7.35975	26.9545	0.10974
221.4	823.653	295.152			200.48	200.66	4.81235	7.6279	27.3569	0.12264
221.45	825.773	297.586			200.481	200.661	5.77472	7.35663	27.885	0.1077
221.5	816.437	310.857			200.482	200.662	6.70839	7.68045	29.0218	0.12408
221.55	805.207	308.999			200.483	200.663	5.38555	6.6787	27.5944	0.10554
221.6	794.307	299.144			200.484	200.664	5.50911	7.01139	27.0439	0.09924
221.65	786.266	307.999			200.485	200.665	4.545	7.34958	27.1557	0.10824
221.7	776.981	303.854			200.486	200.666	5.57518	7.33735	28.6861	0.1035
221.75	765.073	289.712			200.487	200.667	6.36506	7.66645	29.3896	0.1005
221.8	751.777	283.423			200.488	200.668	5.08654	7.03911	28.0821	0.09552
221.85	743.657	266.15			200.489	200.669	4.39115	6.60753	26.4593	0.0987
221.9	740.511	260.865			200.491	200.671	5.81299	8.21193	27.9217	0.12378
221.95	737.818	253.725			200.492	200.672	4.12015	6.57029	25.9276	0.10704
222	730.185	238.58			200.493	200.673	6.21498	6.34209	28.792	0.12444
222.05	720.388	243.009			200.494	200.674	4.69392	6.35231	27.0626	0.11082
222.1	711.342	255.431			200.495	200.675	5.29438	6.52475	27.3959	0.12312
222.15	705.301	252.712			200.496	200.676	3.53044	6.86014	27.2344	0.11556
222.2	705.168	245.85			200.497	200.677	5.82644	6.61397	27.9833	0.10368
222.25	708.051	243.991			200.498	200.678	5.93788	6.33117	27.6562	0.10224
222.3	714.757	254.701			200.499	200.679	4.96001	6.65826	26.9816	0.08802
222.35	723.139	257.417			200.5	200.68	4.43546	5.83543	25.4086	0.09234
222.4	732.992	257.421			200.501	200.681	5.11285	7.17971	27.3824	0.10086
222.45	742.488	254.421			200.503	200.683	5.49138	7.15997	27.7207	0.10188
222.5	747.001	257.993			200.504	200.684	5.97076	5.81033	27.0293	0.08958
222.55	738.026	259.285			200.505	200.685	4.61822	6.45778	26.5439	0.09864
222.6	725.378	255.287			200.506	200.686	4.27315	6.14483	26.2004	0.0906
222.65	714.58	242.428			200.507	200.687	5.53241	6.05579	27.1777	0.09564
222.7	702.125	243.284			200.508	200.688	6.69896	7.17276	29.4069	0.10008
222.75	691.858	245.986			200.509	200.689	4.19781	6.48438	26.3487	0.09672
222.8	682.937	241.845			200.51	200.69	4.45039	5.46672	25.0566	0.08346
222.85	677.185	230.274			200.511	200.691	4.8168	6.95744	27.1283	0.08838
222.9	679.37	234.414			200.512	200.692	5.03857	6.48079	27.519	0.0834
222.95	683.242	244.846			200.513	200.693	4.79499	5.5979	26.2956	0.08526
223	684.596	238.138			200.515	200.695	4.17198	5.56537	25.4358	0.08394
223.05	690.323	247.994			200.516	200.696	6.20762	6.27457	27.247	0.0954
223.1	692.802	233.718			200.517	200.697	6.08649	6.39637	27.6299	0.09228
223.15	690.84	233.716			200.518	200.698	5.77361	6.46511	27.199	0.09372
223.2	686.808	229.137			200.519	200.699	5.79055	6.14063	27.1189	0.08994
223.25	678.11	218.43			200.52	200.7	5.19173	5.69567	26.1396	0.09408
223.3	664.85	203.141			200.521	200.701	4.18103	5.96204	25.1836	0.09354
223.35	652.542	211.138			200.522	200.702	4.91755	5.77033	26.3496	0.06582
223.4	643.273	203.996			200.523	200.703	6.28126	5.30292	26.5279	0.06696
223.45	640.23	212.999			200.524	200.704	4.43494	5.28593	25.2821	0.07476
223.5	641.163	206.001			200.526	200.706	3.75342	5.95439	25.2744	0.08208
223.55	642.419	230.719			200.527	200.707	3.08335	5.27147	24.0729	0.07296
223.6	651.737	235.142			200.528	200.708	4.46268	5.69548	26.6667	0.07572
223.65	662.213	248.57			200.529	200.709	4.16329	6.13513	26.6692	0.08862
223.7	671.739	254.861			200.53	200.71	5.16955	6.83583	27.3126	0.10038
223.75	681.946	250.294			200.531	200.711	4.20517	5.65693	26.8719	0.06558
223.8	691.976	247.578			200.532	200.712	5.58048	5.10907	26.3848	0.06324
223.85	706.653	252.004			200.533	200.713	4.09092	5.59827	26.0654	0.0837
223.9	725.984	247.865			200.534	200.714	5.67429	6.59545	28.4076	0.08472
223.95	741.179	253.284			200.535	200.715	5.48439	5.91561	26.9914	0.09282
224	755.041	241.72			200.536	200.716	5.29046	6.47757	27.4523	0.09198
224.05	764.325	238.142			200.538	200.718	5.12232	5.89493	26.7196	0.0807
224.1	769.67	252.425			200.539	200.719	5.71955	5.77775	26.9963	0.07266
224.15	773.516	270.142			200.54	200.72	4.49084	6.24316	26.6218	0.0924
224.2	773.93	273.711			200.541	200.721	5.26352	6.29753	26.6403	0.09168
224.25	767.176	272.855			200.542	200.722	5.27633	6.05075	26.8496	0.08082
224.3	757.322	270.153			200.543	200.723	5.30169	5.60359	26.7326	0.0903
224.35	751.694	275.433			200.544	200.724	5.85037	6.71883	27.3829	0.08154
224.4	751.429	269.144			200.545	200.725	5.57428	5.98519	26.4209	0.09108
224.45	752.564	272.01			200.546	200.726	3.79652	7.43652	24.5334	0.10998
224.5	752.285	263.293			200.547	200.727	6.33409	8.10133	24.8529	0.11088
224.55	749.104	260.868			200.548	200.728	6.00305	11.9446	22.3133	0.19194
224.6	747.086	260.867			200.55	200.73	6.29529	9.75273	24.7889	0.1614
224.65	750.238	261.72			200.551	200.731	4.90526	9.67904	25.5696	0.14316
224.7	749.304	270.581			200.552	200.732	5.63072	9.37869	25.2578	0.1377
224.75	746.98	272.306			200.553	200.733	6.05229	11.172	25.3412	0.1572
224.8	740.614	264.438			200.554	200.734	5.98606	9.75427	25.2723	0.14514
224.85	733.181	264.295			200.555	200.735	5.55146	9.48318	24.4224	0.15156
224.9	726.565	264.009			200.556	200.736	6.48228	10.3817	25.2456	0.15504
224.95	722.161	258.584			200.557	200.737	5.59837	11.1548	22.7877	0.19074
225	717.652	260.44			200.558	200.738	5.48735	9.84811	23.2111	0.17718
225.05	716.651	255.149			200.559	200.739	7.00369	10.5908	25.0836	0.17658
225.1	715.62	253.428			200.561	200.741	5.43431	11.1188	25.7116	0.18942
225.15	716.718	255.864			200.562	200.742	6.49906	10.4999	25.5564	0.16788
225.2	713.459	257.724			200.563	200.743	6.60208	10.7641	26.0416	0.17172
225.25	709.835	258.008			200.564	200.744	5.81284	10.5147	25.2456	0.1719
225.3	704.328	257.146			200.565	200.745	6.19422	10.8061	24.1819	0.1938
225.35	693.066	249.006			200.566	200.746	5.34558	13.1896	20.779	0.27012
225.4	680.264	233.72			200.567	200.747	5.92025	11.334	23.5614	0.21534
225.45	663.531	239.149			200.568	200.748	6.85122	11.5035	26.4164	0.19152
225.5	648.039	225.571			200.569	200.749	6.86049	11.8594	26.5339	0.18372
225.55	637.777	217.567			200.57	200.75	5.80251	10.4953	24.9493	0.16332
225.6	628.558	207.281			200.571	200.751	6.16008	11.1917	25.9551	0.1893
225.65	621.393	193.998			200.573	200.753	5.57296	10.2461	25.1208	0.1659
225.7	619.659	201.29			200.574	200.754	6.16516	10.5862	24.7647	0.16368
225.75	616.484	211.574			200.575	200.755	6.7203	12.3703	24.7959	0.21462
225.8	616.275	206.999			200.576	200.756	6.08898	12.1155	25.9617	0.17382
225.85	617.889	229.429			200.577	200.757	5.90601	11.4055	25.3758	0.16788
225.9	625.227	231.146			200.578	200.758	6.92306	13.4468	25.7054	0.21264
225.95	635.237	244.717			200.579	200.759	6.03545	11.2834	23.7024	0.18696
226	645.909	267.715			200.58	200.76	4.52128	10.8494	23.9859	0.16932
226.05	655.146	271.71			200.581	200.761	6.11952	11.013	26.946	0.17496
226.1	666.328	265.284			200.582	200.762	6.11772	10	25.784	0.16242
226.15	678.795	268.001			200.583	200.763	6.04514	9.82198	25.338	0.15168
226.2	689.283	253.716			200.585	200.765	4.88001	10.24	24.6483	0.14526
226.25	693.492	253.571			200.586	200.766	5.6052	10.5742	25.183	0.17112
226.3	690.763	255.285			200.587	200.767	6.10539	11.6872	26.3503	0.18216
226.35	686.435	246.429			200.588	200.768	7.14531	12.7157	25.8271	0.20982
226.4	680.803	238.711			200.589	200.769	6.58699	11.3962	25.7897	0.18354
226.45	671.923	245.71			200.59	200.77	6.73274	13.8411	24.9514	0.25146
226.5	662.017	244.42			200.591	200.771	7.15135	15.3419	24.2562	0.27198
226.55	649.66	235.563			200.592	200.772	8.70724	15.6271	21.4621	0.31692
226.6	633.341	227.563			200.593	200.773	8.90074	26.7078	1.40757	0.57522
226.65	617.81	228.568			200.594	200.774	7.49896	22.2782	1.92793	0.43704
226.7	603.301	231.855			200.596	200.776	8.77002	24.3534	1.75364	0.4797
226.75	589.867	225.293			200.597	200.777	9.20864	27.5888	1.59714	0.58398
226.8	579.882	211.013			200.598	200.778	9.40939	27.2205	1.90057	0.62196
226.85	571.103	211.445			200.599	200.779	8.92096	27.6281	2.084	0.63138
226.9	568.11	223.878			200.6	200.78	9.54524	27.3428	2.77157	0.61134
226.95	574.553	215.013			200.601	200.781	8.57748	26.3516	2.62286	0.58092
227	585.396	202.582			200.602	200.782	8.11721	27.151	2.46957	0.55878
227.05	596.49	198.58			200.603	200.783	9.32225	26.9888	3.23543	0.58398
227.1	608.968	210.573			200.604	200.784	8.93345	28.3793	2.18743	0.60462
227.15	621.976	219.566			200.605	200.785	9.24406	27.7221	3.47971	0.5829
227.2	636.187	219.569			200.606	200.786	9.52269	27.0423	2.79543	0.6003
227.25	649.723	219.562			200.608	200.788	9.25073	26.3643	3.19164	0.59958
227.3	657.151	237.142			200.609	200.789	9.58309	25.8904	3.19571	0.5883
227.35	662.867	245.997			200.61	200.79	8.76923	26.0615	3.57614	0.6042
227.4	669.513	248.428			200.611	200.791	9.29303	25.2574	3.4475	0.58314
227.45	675.347	251.149			200.612	200.792	8.14796	23.3863	3.65214	0.55716
227.5	680.585	256.576			200.613	200.793	7.48774	20.0679	4.77771	0.50856
227.55	685.76	254.72			200.614	200.794	7.52453	20.7101	3.67593	0.53724
227.6	687.815	239.008			200.615	200.795	8.42591	22.4133	4.94493	0.57984
227.65	690.405	231.863			200.616	200.796	8.02715	21.9683	4.875	0.53598
227.7	694.948	231.867			200.617	200.797	8.77791	23.1019	5.83629	0.56862
227.75	699.694	225.586			200.618	200.798	7.63819	24.2854	3.38086	0.59088
227.8	704.17	222.009			200.62	200.8	8.16427	23.7783	2.75629	0.57354
227.85	705.002	216.583			200.621	200.801	9.19699	22.7142	3.12621	0.54528
227.9	700.531	213.863			200.622	200.802	6.59441	21.5018	3.15764	0.53406
227.95	688.776	226.014			200.623	200.803	8.34697	22.0018	3.08257	0.53424
228	664.215	211.732			200.624	200.804	8.31976	23.4908	3.12307	0.5505
228.05	626.462	185.728			200.625	200.805	9.45625	24.9453	3.20014	0.60834
228.1	574.383	170.58			200.626	200.806	8.65652	23.4313	2.64964	0.57348
228.15	514.98	148.149			200.627	200.807	8.44444	24.9847	2.27043	0.59196
228.2	460.376	136.152			200.628	200.808	7.23399	21.5554	1.75893	0.50802
228.25	417.71	130.014			200.629	200.809	7.42638	20.4223	3.19821	0.47718
228.3	391.775	121.151			200.631	200.811	7.23092	18.7436	4.25071	0.43248
228.35	392.623	141.863			200.632	200.812	8.68092	24.392	3.53386	0.60942
228.4	421.26	164.29			200.633	200.813	8.16146	22.4356	3.85064	0.52236
228.45	473.225	185.718			200.634	200.814	5.6691	20.4261	3.77793	0.49764
228.5	538.041	210.438			200.635	200.815	7.8138	22.8682	3.44393	0.56442
228.55	606.438	239.86			200.636	200.816	7.87818	22.4365	4.1905	0.54006
228.6	665.908	262			200.637	200.817	9.16009	24.1492	4.07857	0.58488
228.65	721.52	285.999			200.638	200.818	8.23373	22.0619	3.65471	0.52242
228.7	766.273	291.571			200.639	200.819	7.23558	21.2057	3.53779	0.50574
228.75	795.572	302.287			200.64	200.82	7.35226	22.4576	4.01057	0.522
228.8	815.694	310.288			200.641	200.821	8.32394	21.9828	3.97286	0.5088
228.85	830.362	315.998			200.643	200.823	8.33993	22.5266	3.79614	0.51372
228.9	843.105	302.14			200.644	200.824	8.25035	24.1194	4.13893	0.57246
228.95	858.982	300.424			200.645	200.825	6.55941	21.143	3.62536	0.47328
229	869.532	297.844			200.646	200.826	7.82984	23.0314	4.14936	0.52848
229.05	876.581	300.131			200.647	200.827	7.43686	23.0032	3.9085	0.55038
229.1	882.687	300.988			200.648	200.828	8.23198	23.5331	3.15593	0.54606
229.15	885.272	295.842			200.649	200.829	6.99284	19.0976	2.35686	0.42744
229.2	884.616	285.981			200.65	200.83	8.43109	20.3641	1.85164	0.47022
229.25	874.778	296.7			200.651	200.831	8.33543	22.9607	2.29514	0.52452
229.3	863.009	289.561			200.652	200.832	9.00159	22.9734	2.33571	0.5154
229.35	852.921	279.14			200.654	200.834	7.61606	20.4085	2.307	0.44412
229.4	841.842	275.997			200.655	200.835	7.56424	19.142	2.03579	0.4305
229.45	825.192	273.431			200.656	200.836	8.49923	24.1481	2.79364	0.54876
229.5	804.091	267.436			200.657	200.837	7.71888	22.8	2.02193	0.51774
229.55	779.351	266.011			200.658	200.838	7.16813	23.7814	1.65671	0.51438
229.6	752.548	250.009			200.659	200.839	8.70295	25.3879	2.93757	0.57588
229.65	713.035	237.438			200.66	200.84	8.43178	23.1517	2.62871	0.52332
229.7	657.764	208.866			200.661	200.841	7.70728	22.2088	2.9335	0.51168
229.75	586.956	178.719			200.662	200.842	8.32918	23.4722	2.97379	0.52044
229.8	508.597	145.427			200.663	200.843	9.8442	24.6706	3.17879	0.56904
229.85	429.49	120.139			200.664	200.844	8.36788	23.8861	3.4005	0.52884
229.9	352.189	93.1387			200.666	200.846	7.76292	19.0656	2.02971	0.3801
229.95	281.587	74.9968			200.667	200.847	8.84806	20.8264	1.65021	0.4479
230	225.019	60.854			200.668	200.848	7.37905	23.6645	2.76643	0.51366
230.05	188.874	63.2825			200.669	200.849	7.3755	22.5086	4.05421	0.50628
230.1	179.13	69.5717			200.67	200.85	7.63078	22.2498	3.66679	0.51294
230.15	193.319	87.5738			200.671	200.851	9.43957	24.9139	3.74514	0.5658
230.2	229.422	109.718			200.672	200.852	5.83131	20.8117	3.25621	0.48384
230.25	286.626	133.719			200.673	200.853	7.83635	22.3795	5.09307	0.51174
230.3	360.342	157.436			200.674	200.854	6.71855	22.0766	4.53129	0.48744
230.35	448.401	200.292			200.675	200.855	7.39731	22.9023	4.41014	0.53718
230.4	548.511	237.577			200.676	200.856	7.53713	22.8333	4.143	0.52368
230.45	657.022	281.002			200.678	200.858	5.97235	20.1237	3.99779	0.4506
230.5	759.228	300.289			200.679	200.859	8.03208	22.7044	3.80557	0.51606
230.55	841.725	315.573			200.68	200.86	9.00296	25.0481	3.64793	0.5754
230.6	896.583	329.002			200.681	200.861	7.33955	23.0245	4.03979	0.51312
230.65	923.596	328.277			200.682	200.862	8.36852	23.7153	4.2135	0.55728
230.7	928.839	314.706			200.683	200.863	7.93662	21.0192	4.17243	0.49752
230.75	912.703	296.993			200.684	200.864	6.05388	18.28	3.72807	0.42708
230.8	878.971	283.71			200.685	200.865	9.01329	22.9747	3.796	0.54738
230.85	835.547	275.85			200.686	200.866	8.33495	22.3991	3.47593	0.5487
230.9	796.017	276.425			200.687	200.867	9.48341	25.161	3.27964	0.58734
230.95	773.889	264.425			200.689	200.869	7.22679	22.498	3.154	0.53478
231	763.595	266.008			200.69	200.87	8.42861	23.477	3.72036	0.58458
231.05	753.896	278.721			200.691	200.871	8.80465	24.8306	3.33614	0.57876
231.1	749.298	287.579			200.692	200.872	8.49124	24.2954	3.31893	0.57144
231.15	750.357	270.148			200.693	200.873	7.83429	22.509	3.68979	0.52524
231.2	756.765	271.152			200.694	200.874	8.31828	24.0373	3.10379	0.5595
231.25	758.907	271.859			200.695	200.875	7.58636	24.8607	3.1915	0.58074
231.3	753.252	269.576			200.696	200.876	8.20599	25.2296	3.25536	0.5826
231.35	747.9	274.285			200.697	200.877	7.72841	21.8791	3.55607	0.50628
231.4	746.312	256.428			200.698	200.878	8.46291	22.3952	4.02186	0.55506
231.45	740.682	243.137			200.699	200.879	8.65795	23.3491	4.26371	0.57954
231.5	726.349	240.859			200.701	200.881	8.23548	23.8752	3.57643	0.56514
231.55	708.522	232.711			200.702	200.882	7.11805	19.2384	4.06521	0.49746
231.6	693.451	218.43			200.703	200.883	8.13039	22.2633	3.92071	0.55338
231.65	678.91	220.998			200.704	200.884	7.3962	22.5421	3.73179	0.5268
231.7	662.122	213.852			200.705	200.885	8.64715	23.1196	3.619	0.5283
231.75	645.663	203.138			200.706	200.886	7.98549	24.2549	4.32286	0.57084
231.8	633.094	201.428			200.707	200.887	6.84821	22.364	4.921	0.51792
231.85	624.525	201.424			200.708	200.888	8.44518	24.3687	4.23314	0.56856
231.9	621.449	198.852			200.709	200.889	9.05437	23.2717	4.0465	0.55734
231.95	623.271	202.137			200.71	200.89	8.13356	23.4774	4.15321	0.5517
232	624.905	199.561			200.711	200.891	7.09279	21.9081	3.75643	0.51798
232.05	629.965	206.136			200.713	200.893	10.1208	23.1129	3.795	0.56442
232.1	635.789	214.993			200.714	200.894	6.77589	17.9732	1.77964	0.37542
232.15	639.413	228.567			200.715	200.895	6.12296	20.0662	2.6995	0.48264
232.2	644.339	243.579			200.716	200.896	7.31472	19.1184	3.0325	0.42954
232.25	647.372	255.579			200.717	200.897	7.76361	20.4472	3.31914	0.47124
232.3	645.334	258.146			200.718	200.898	5.6736	17.4535	3.01143	0.42486
232.35	644.505	265.294			200.719	200.899	6.75175	18.3376	3.12886	0.44244
232.4	639.066	261.724			200.72	200.9	6.98215	19.694	2.63614	0.44496
232.45	634.732	269.442			200.721	200.901	5.37284	17.4851	2.36836	0.4017
232.5	635.669	265.584			200.722	200.902	8.16983	19.8135	3.14014	0.50292
232.55	636.785	248.859			200.724	200.904	7.82794	23.8427	4.19136	0.57408
232.6	635.875	234.289			200.725	200.905	8.02509	21.3914	3.91	0.4761
232.65	637.282	224.578			200.726	200.906	7.70675	21.7588	4.05443	0.47886
232.7	638.359	218.148			200.727	200.907	6.58419	17.9353	3.05386	0.40038
232.75	643.821	221.573			200.728	200.908	8.63036	17.944	3.94421	0.4293
232.8	651.257	228.709			200.729	200.909	8.24691	20.3476	4.444	0.46842
232.85	652.36	222.994			200.73	200.91	8.79877	23.1439	3.9735	0.51522
232.9	641.481	215.423			200.731	200.911	7.05764	20.3283	4.59743	0.47304
232.95	616.001	204.712			200.732	200.912	7.67435	20.7953	5.24343	0.45954
233	570.162	183.285			200.733	200.913	8.18418	21.9917	4.54157	0.48876
233.05	509.047	159.001			200.734	200.914	6.68276	19.8874	3.48214	0.44346
233.1	437.59	129.574			200.736	200.916	6.51404	19.1154	2.87907	0.4506
233.15	360.219	89.1491			200.737	200.917	6.99184	18.6603	3.08471	0.4263
233.2	282.27	61.8642			200.738	200.918	7.00237	20.6395	2.57807	0.43194
233.25	212.857	44.7202			200.739	200.919	6.42928	18.9256	2.54086	0.40812
233.3	157.788	39.0014			200.74	200.92	6.56952	19.3817	2.00329	0.40224
233.35	122.45	35.001			200.741	200.921	7.79437	18.9651	3.74507	0.45666
233.4	103.072	32.2868			200.742	200.922	6.84408	20.1635	4.76443	0.4767
233.45	92.9894	25.1426			200.743	200.923	5.81903	13.9507	3.1275	0.34434
233.5	85.5307	28.2823			200.744	200.924	6.78727	15.9437	2.89207	0.39942
233.55	80.8547	30.9949			200.745	200.925	6.50716	19.7935	2.81014	0.42918
233.6	78.2822	34.2801			200.746	200.926	7.19698	18.6115	3.39743	0.39564
233.65	77.4046	27.8516			200.748	200.928	8.60395	21.8675	3.39171	0.46368
233.7	76.1557	28.9933			200.749	200.929	7.23367	19.914	2.81093	0.41922
233.75	75.7291	28.137			200.75	200.93	8.36762	21.4325	3.00271	0.45786
233.8	76.6159	30.5676			200.751	200.931	7.44284	19.7383	2.45736	0.41418
233.85	77.801	26.5704			200.752	200.932	6.06738	18.7903	3.11914	0.43914
233.9	78.2569	22.5704			200.753	200.933	8.67224	21.5539	3.59407	0.48174
233.95	79.4331	17.8552			200.754	200.934	7.16564	19.6299	2.71221	0.39384
234	80.305	22.8545			200.755	200.935	6.87706	14.9804	4.35607	0.34956
234.05	80.9588	19.2847			200.756	200.936	6.17977	19.55	4.2525	0.44046
234.1	81.0488	25.7122			200.757	200.937	6.34924	17.3173	4.47607	0.42144
234.15	80.2693	25.7114			200.759	200.939	8.19694	21.8746	4.83029	0.51792
234.2	79.9027	29.5711			200.76	200.94	7.98724	22.3576	4.43643	0.52596
234.25	80.6472	32.0004			200.761	200.941	7.14574	21.73	3.99621	0.51264
234.3	80.1933	35.4301			200.762	200.942	7.51341	18.3429	6.10486	0.4503
234.35	79.6715	35.4316			200.763	200.943	8.16469	20.7703	6.4615	0.46824
234.4	80.2803	37.4311			200.764	200.944	8.24294	22.6141	5.59221	0.54966
234.45	80.5889	33.859			200.765	200.945	8.44888	21.6549	5.09064	0.52302
234.5	79.9803	38.2844			200.766	200.946	7.80385	20.6882	6.31114	0.48924
234.55	79.6634	34.8528			200.767	200.947	7.33002	18.2402	7.31157	0.44226
234.6	79.8619	32.2814			200.768	200.948	6.50695	19.245	7.38707	0.45858
234.65	81.0196	32.4249			200.769	200.949	7.00359	18.8818	6.65657	0.45156
234.7	81.9702	30.1389			200.771	200.951	7.46989	20.2408	6.30821	0.46098
234.75	81.7947	31.4241			200.772	200.952	6.55142	20.1276	6.25636	0.45174
234.8	81.0267	32.5689			200.773	200.953	7.63703	22.1534	5.94293	0.48396
234.85	80.8749	27.715			200.774	200.954	8.28884	23.1105	3.91064	0.55788
234.9	80.302	26.1441			200.775	200.955	8.16681	24.9606	3.56093	0.61146
234.95	79.564	30.575			200.776	200.956	9.60046	24.295	4.25614	0.61092
235	78.3038	28.4323			200.777	200.957	7.73873	22.2629	4.282	0.54846
235.05	77.9813	27.2899			200.778	200.958	8.41966	23.4522	4.11621	0.5976
235.1	79.7731	27.0047			200.779	200.959	9.37789	24.265	4.51429	0.60516
235.15	82.0246	25.289			200.78	200.96	7.38191	23.1792	4.38486	0.5631
235.2	84.6408	24.5737			200.781	200.961	8.84441	25.421	4.05064	0.64896
235.25	88.412	27.8574			200.783	200.963	8.69289	25.2203	4.31879	0.6276
235.3	90.363	22.8554			200.784	200.964	8.88131	22.8142	5.56379	0.5676
235.35	90.909	24.9973			200.785	200.965	6.24113	20.1573	6.12693	0.50736
235.4	90.161	28.4264			200.786	200.966	7.77785	22.8543	4.13336	0.56538
235.45	87.9714	28.425			200.787	200.967	6.98246	19.3112	8.91229	0.49134
235.5	86.4927	30.2815			200.788	200.968	7.89596	21.8981	4.56393	0.56364
235.55	84.4791	30.9979			200.789	200.969	8.64138	22.915	4.32814	0.53832
235.6	82.2407	30.4284			200.79	200.97	7.84255	23.1467	4.01693	0.55614
235.65	81.7472	33.7136			200.791	200.971	7.00491	22.4752	3.70879	0.5346
235.7	82.0965	32.7125			200.792	200.972	8.93631	24.3109	3.46286	0.59082
235.75	82.8683	31.5673			200.794	200.974	8.95786	24.0304	3.13871	0.6159
235.8	84.4237	32.8539			200.795	200.975	7.57932	24.2945	3.09179	0.54468
235.85	85.7323	32.2833			200.796	200.976	7.77706	23.5585	3.36107	0.57552
235.9	87.5893	34.5681			200.797	200.977	7.12398	23.5014	2.97871	0.585
235.95	88.2596	31.997			200.798	200.978	7.37624	22.9003	3.8495	0.56934
236	87.6163	29.9987			200.799	200.979	7.7958	24.3434	3.72714	0.59814
236.05	87.6813	32.8561			200.8	200.98	7.6572	21.031	6.47586	0.49746
236.1	88.8148	30.8577			200.801	200.981	8.97771	24.1163	4.43571	0.5766
236.15	90.9053	32.1437			200.802	200.982	9.40251	25.2439	4.31329	0.60474
236.2	93.2845	33.4301			200.803	200.983	8.45576	26.5636	2.98271	0.61098
236.25	94.5265	33.143			200.804	200.984	9.21701	26.5428	3.00314	0.61818
236.3	95.4196	35.3331			200.806	200.986	9.74054	25.3678	3.32971	0.61374
236.35	97.9169	38.3977			200.807	200.987	6.78579	22.4745	3.22543	0.51504
236.4	99.3086	37.2485			200.808	200.988	8.79734	24.3696	2.71864	0.58644
236.45	100.969				200.809	200.989	9.20944	26.7247	2.85093	0.64164
236.5	101.369				200.81	200.99	9.0081	24.4603	4.04436	0.60282
236.55	101.167				200.811	200.991	8.58971	23.1419	3.83986	0.57552
236.6	100.865				200.812	200.992	7.37741	22.6685	4.21693	0.54048
236.65	101.055				200.813	200.993	9.95093	22.7178	4.96893	0.54786
236.7	99.1138				200.814	200.994	8.70236	23.9921	4.49664	0.56184
236.75	98.0839				200.815	200.995	9.37234	22.3219	4.91293	0.57372
236.8	97.6161				200.816	200.996	8.86241	24.5166	4.382	0.61686
236.85	97.2294				200.818	200.998	9.11038	22.4348	4.91821	0.54936
236.9	96.3749				200.819	200.999	7.26094	20.3348	4.33579	0.52746
236.95	96.4182				200.82	201	8.0631	22.8062	4.4515	0.57336
237	96.5463				200.821	201.001	8.64503	24.7566	3.42243	0.58266
237.05	96.0673				200.822	201.002	8.57658	24.868	3.87393	0.5679
237.1	95.0482				200.823	201.003	8.40097	21.9816	4.65271	0.5547
237.15	94.9474				200.824	201.004	6.64046	19.1768	5.37686	0.4974
237.2	96.7834				200.825	201.005	8.10529	21.5271	5.27829	0.5409
237.25	100.469				200.826	201.006	8.36195	22.5629	4.83236	0.51948
237.3	103.139				200.827	201.007	7.98639	19.4932	6.44364	0.49068
237.35	105.19				200.829	201.009	7.74964	17.7805	6.87229	0.47886
237.4	108.652				200.83	201.01	8.38673	24.5408	2.57464	0.54774
					200.831	201.011	10.8542	26.2602	1.66593	0.56052
					200.832	201.012	8.68706	24.7836	2.17657	0.53748
					200.833	201.013	8.77135	26.1598	2.7295	0.56022
					200.834	201.014	8.38858	24.6589	2.80986	0.5076
					200.835	201.015	8.31648	23.8447	2.34529	0.53544
					200.836	201.016	9.4185	27.328	1.55014	0.5709
					200.837	201.017	8.49028	26.9255	1.64493	0.52872
					200.838	201.018	9.08471	25.3229	2.05057	0.56754
					200.839	201.019	8.14394	22.5765	2.965	0.51534
					200.841	201.021	8.41924	23.9636	2.32186	0.54324
					200.842	201.022	8.10651	23.6754	2.70279	0.54558
					200.843	201.023	8.31695	22.7442	3.63593	0.51144
					200.844	201.024	7.95817	22.6231	3.92386	0.51198
					200.845	201.025	8.27142	23.9631	3.09421	0.53802
					200.846	201.026	9.02197	24.1474	3.33186	0.52266
					200.847	201.027	7.92106	22.0707	3.06864	0.49602
					200.848	201.028	8.65239	24.0815	2.72721	0.53106
					200.849	201.029	7.74302	22.7572	2.90436	0.49632
					200.85	201.03	8.65726	23.4314	3.68864	0.5586
					200.851	201.031	6.79918	21.3947	2.77521	0.47538
					200.853	201.033	6.69034	21.1827	2.82579	0.45216
					200.854	201.034	6.93704	20.9933	4.27764	0.52938
					200.855	201.035	6.37735	19.0223	3.77321	0.474
					200.856	201.036	6.94387	22.188	3.8535	0.52842
					200.857	201.037	8.79416	22.8351	3.63479	0.55674
					200.858	201.038	7.81089	22.8328	3.42	0.5223
					200.859	201.039	6.67445	22.0949	3.211	0.51
					200.86	201.04	7.53009	23.4482	3.2305	0.51354
					200.861	201.041	9.46096	25.8338	2.55164	0.58908
					200.862	201.042	6.07939	21.5038	2.28786	0.49446
					200.864	201.044	7.20858	20.4427	0.9545	0.46716
					200.865	201.045	9.20578	23.3732	1.24857	0.54072
					200.866	201.046	7.42881	20.8755	1.62007	0.46386
					200.867	201.047	6.68245	17.4876	1.37271	0.34434
					200.868	201.048	8.51088	23.7744	2.14943	0.549
					200.869	201.049	7.85663	25.2855	2.05521	0.54984
					200.87	201.05	8.9937	24.4833	2.07629	0.53232
					200.871	201.051	8.47244	24.9167	2.1345	0.55446
					200.872	201.052	8.57965	23.9643	2.3895	0.54396
					200.873	201.053	7.25882	22.6673	1.93257	0.50586
					200.874	201.054	6.91041	19.036	1.62193	0.43344
					200.876	201.056	7.18364	21.0286	1.58186	0.4653
					200.877	201.057	7.95759	22.2871	1.43664	0.48732
					200.878	201.058	6.95404	20.2427	0.885357	0.43452
					200.879	201.059	6.78658	18.0453	1.20329	0.37002
					200.88	201.06	6.52574	18.8592	1.773	0.41034
					200.881	201.061	5.81543	17.9906	1.29693	0.38292
					200.882	201.062	5.71272	16.1199	1.17843	0.33702
					200.883	201.063	7.68552	18.6105	1.7815	0.43602
					200.884	201.064	5.29645	16.2259	1.48386	0.36312
					200.885	201.065	5.55787	16.1198	1.36864	0.34434
					200.886	201.066	6.30688	15.5588	0.969071	0.28422
					200.888	201.068	8.28138	21.3575	1.43536	0.4299
					200.889	201.069	7.35919	21.5332	1.14443	0.42888
					200.89	201.07	7.09978	19.7835	1.16871	0.3744
					200.891	201.071	8.23532	21.5722	1.19893	0.42126
					200.892	201.072	6.99416	19.5667	1.09964	0.41262
					200.893	201.073	6.5538	19.3155	0.928	0.39654
					200.894	201.074	6.90612	20.3346	0.876214	0.39762
					200.895	201.075	6.42616	19.5271	0.929071	0.40122
					200.896	201.076	5.67561	19.2655	1.09021	0.3909
					200.897	201.077	7.59108	19.7855	0.989929	0.4092
					200.899	201.079	7.40314	20.2803	1.22436	0.43494
					200.9	201.08	6.37459	17.9454	0.867786	0.34998
					200.901	201.081	5.97176	16.6322	1.08421	0.34356
					200.902	201.082	5.83941	18.7975	0.870857	0.40278
					200.903	201.083	6.52098	21.1017	0.617643	0.44178
					200.904	201.084	6.19777	19.521	0.497071	0.38652
					200.905	201.085	7.54481	21.7008	0.592357	0.44922
					200.906	201.086	8.65509	24.8304	1.37743	0.5886
					200.907	201.087	8.16284	22.1962	1.38786	0.49974
					200.908	201.088	6.88352	21.6735	1.17221	0.486
					200.909	201.089	7.48938	23.2141	1.01336	0.52176
					200.911	201.091	6.10602	20.4515	0.817286	0.4746
					200.912	201.092	7.13875	18.5616	0.804071	0.41292
					200.913	201.093	7.90719	24.4603	1.14493	0.5394
					200.914	201.094	7.15992	21.8525	1.02729	0.48012
					200.915	201.095	7.16961	18.8054	1.22914	0.42078
					200.916	201.096	7.02529	21.323	1.31521	0.49812
					200.917	201.097	7.46444	21.1082	1.16307	0.4632
					200.918	201.098	7.14674	19.0499	0.680286	0.40176
					200.919	201.099	8.5554	24.1733	0.742	0.51606
					200.92	201.1	5.61256	19.1867	0.820071	0.4155
					200.922	201.102	5.57201	17.8106	1.60057	0.43482
					200.923	201.103	6.95446	18.0106	5.9065	0.41274
					200.924	201.104	6.34214	20.4887	6.61321	0.489
					200.925	201.105	6.41801	18.5092	6.86621	0.49746
					200.926	201.106	4.38676	13.547	9.14971	0.3741
					200.927	201.107	5.57328	13.8483	9.52479	0.37122
					200.928	201.108	7.24526	16.5017	8.9935	0.45672
					200.929	201.109	9.13198	21.3052	7.1145	0.5973
					200.93	201.11	5.61018	12.917	10.0152	0.37176
					200.931	201.111	6.29338	17.5178	6.75314	0.51492
					200.932	201.112	6.75201	18.2964	5.28936	0.53526
					200.934	201.114	6.55163	18.8956	5.85693	0.52062
					200.935	201.115	6.84334	18.3382	7.28221	0.51042
					200.936	201.116	7.30186	20.451	5.31321	0.57078
					200.937	201.117	6.95292	19.3656	5.48214	0.5316
					200.938	201.118	6.90051	18.5402	6.54379	0.5055
					200.939	201.119	6.57762	19.4458	5.28886	0.51144
					200.94	201.12	6.99967	20.6242	4.58664	0.54264
					200.941	201.121	6.67779	20.6863	4.73729	0.52614
					200.942	201.122	6.7716	20.5684	5.2205	0.5484
					200.943	201.123	6.76414	19.6609	4.77314	0.5514
					200.944	201.124	8.09068	22.0198	4.4875	0.56508
					200.946	201.126	7.76954	21.864	3.77836	0.53754
					200.947	201.127	8.72211	25.0797	3.71636	0.615
					200.948	201.128	7.10936	21.3905	4.85864	0.53676
					200.949	201.129	8.51008	23.1332	4.592	0.56448
					200.95	201.13	7.12445	23.783	3.72843	0.5691
					200.951	201.131	7.89416	23.1514	4.431	0.58896
					200.952	201.132	9.65509	25.4315	3.56057	0.6093
					200.953	201.133	8.21044	25.1087	4.18086	0.59838
					200.954	201.134	6.6501	17.0534	5.74171	0.49728
					200.955	201.135	4.75444	14.4847	6.12614	0.4761
					200.957	201.137	5.90284	12.989	6.56079	0.43086
					200.958	201.138	6.80972	14.3285	6.4775	0.4545
					200.959	201.139	6.35617	15.6065	5.98336	0.46686
					200.96	201.14	5.41075	16.1572	5.12414	0.48132
					200.961	201.141	5.30534	17.1061	5.14829	0.49296
					200.962	201.142	6.46205	18.1105	5.61486	0.5286
					200.963	201.143	5.9103	18.1476	5.14507	0.50448
					200.964	201.144	6.2181	17.7458	4.77364	0.5223
					200.965	201.145	6.10496	17.8706	4.67457	0.5013
					200.966	201.146	6.10544	16.8987	4.7965	0.50004
					200.967	201.147	6.29598	18.3684	4.65536	0.50802
					200.969	201.149	6.49556	18.3263	4.23471	0.47988
					200.97	201.15	8.08438	19.0232	4.43336	0.4812
					200.971	201.151	5.9958	17.7548	5.02843	0.4692
					200.972	201.152	7.28767	21.4149	4.54171	0.5604
					200.973	201.153	8.08126	21.2493	3.97543	0.5556
					200.974	201.154	8.6004	22.0127	4.84407	0.53976
					200.975	201.155	8.76139	22.1432	4.54207	0.53646
					200.976	201.156	9.26926	24.1692	3.64179	0.58758
					200.977	201.157	8.15781	23.4888	3.4285	0.55626
					200.978	201.158	6.94488	21.9963	3.6715	0.52944
					200.979	201.159	7.87368	22.4449	4.25936	0.52308
					200.981	201.161	8.63603	24.4297	3.80357	0.56184
					200.982	201.162	9.08492	24.9911	4.06286	0.56358
					200.983	201.163	9.40992	23.1406	5.09214	0.52002
					200.984	201.164	8.10916	22.2404	4.82029	0.49248
					200.985	201.165	8.07745	25.0374	3.93607	0.53322
					200.986	201.166	7.72597	22.6194	6.67493	0.47148
					200.987	201.167	8.67616	23.9835	5.16493	0.5166
					200.988	201.168	8.30689	24.8431	3.59286	0.51366
					200.989	201.169	8.67589	26.7462	3.092	0.57474
					200.99	201.17	8.09036	25.6577	3.53821	0.5526
					200.992	201.172	8.33035	24.8495	3.79357	0.53874
					200.993	201.173	8.45545	23.8286	5.34957	0.49956
					200.994	201.174	8.10852	24.89	3.85	0.5451
					200.995	201.175	8.23061	22.182	3.80193	0.50292
					200.996	201.176	9.24771	23.9577	2.16093	0.53484
					200.997	201.177	8.19699	23.9282	2.505	0.51648
					200.998	201.178	7.94123	22.7696	2.31771	0.49116
					200.999	201.179	8.93509	24.5541	2.53914	0.54624
					201	201.18	7.09952	23.771	2.50279	0.50556
					201.001	201.181	8.32389	24.1207	2.22579	0.52728
					201.002	201.182	7.90936	23.3068	3.52707	0.4824
					201.004	201.184	7.72962	22.7768	3.53964	0.50316
					201.005	201.185	8.15114	24.698	3.08986	0.5361
					201.006	201.186	7.48493	23.6449	3.1895	0.5226
					201.007	201.187	8.69522	23.0985	3.75807	0.52788
					201.008	201.188	8.46461	23.8082	5.23464	0.54636
					201.009	201.189	8.63968	25.4077	4.62421	0.5661
					201.01	201.19	8.14987	23.2212	4.29686	0.5238
					201.011	201.191	8.03377	22.4065	4.29043	0.54174
					201.012	201.192	9.03388	24.0375	5.20914	0.54456
					201.013	201.193	9.41956	23.6315	4.22671	0.57252
					201.014	201.194	8.80078	22.7745	4.57279	0.52146
					201.016	201.196	8.28985	20.5933	4.49121	0.50916
					201.017	201.197	9.24517	22.4789	5.15514	0.51876
					201.018	201.198	9.71084	23.0612	5.15143	0.56352
					201.019	201.199	7.94144	23.3592	4.45429	0.55104
					201.02	201.2	8.29451	23.485	6.30029	0.50442
					201.021	201.201	7.94642	24.0693	2.93086	0.54594
					201.022	201.202	9.30621	23.9849	4.47093	0.59208
					201.023	201.203	7.62708	20.9965	4.56907	0.52044
					201.024	201.204	7.71152	22.2596	4.85757	0.50688
					201.025	201.205	7.78262	23.7859	4.26143	0.54444
					201.027	201.207	7.29789	20.5658	5.8725	0.50646
					201.028	201.208	5.69038	19.1426	6.31879	0.46056
					201.029	201.209	5.85948	17.1111	6.73279	0.43224
					201.03	201.21	7.20069	19.1429	5.84657	0.47274
					201.031	201.211	7.65254	21.6993	4.78421	0.49926
					201.032	201.212	8.01905	21.0371	3.99964	0.48252
					201.033	201.213	8.58711	21.2209	3.49907	0.47628
					201.034	201.214	6.43918	17.3618	2.69343	0.3507
					201.035	201.215	7.50425	16.2158	1.92879	0.32946
					201.036	201.216	6.92465	7.62617	1.63257	0.15468
					201.037	201.217	7.35491	8.52231	1.81629	0.17838
					201.039	201.219	7.16178	16.2212	2.07579	0.3438
					201.04	201.22	5.56729	17.1391	3.59286	0.39894
					201.041	201.221	8.37328	21.6021	5.30271	0.51012
					201.042	201.222	8.85478	24.259	4.6535	0.55818
					201.043	201.223	7.49049	21.5984	5.73479	0.51546
					201.044	201.224	6.20915	18.486	4.61471	0.4416
					201.045	201.225	8.13462	21.1164	2.5325	0.4935
					201.046	201.226	6.56852	18.5259	3.907	0.44694
					201.047	201.227	9.07666	23.4744	4.22864	0.58482
					201.048	201.228	5.82321	18.7086	3.0945	0.42486
					201.049	201.229	6.00734	17.0245	2.11536	0.36036
					201.051	201.231	7.26141	21.5457	3.43857	0.5445
					201.052	201.232	7.69654	21.3074	4.23643	0.50094
					201.053	201.233	6.25373	19.1728	4.14343	0.4431
					201.054	201.234	7.44798	19.0435	3.42564	0.4389
					201.055	201.235	7.82629	22.5487	2.062	0.52362
					201.056	201.236	6.25204	21.1744	1.5155	0.46626
					201.057	201.237	6.73735	18.5476	1.42721	0.41292
					201.058	201.238	8.05378	21.2053	1.46643	0.48966
					201.059	201.239	7.05812	20.9505	1.3805	0.46608
					201.06	201.24	8.43554	19.5623	1.93114	0.42228
					201.062	201.242	8.10656	20.4943	1.67636	0.46638
					201.063	201.243	6.23626	19.3722	1.73071	0.43224
					201.064	201.244	6.45432	15.6437	2.676	0.32958
					201.065	201.245	6.35469	20.2426	3.9215	0.44394
					201.066	201.246	7.28301	21.0263	3.66507	0.48438
					201.067	201.247	7.46825	19.4699	2.57114	0.45312
					201.068	201.248	6.80548	20.16	2.19436	0.47586
					201.069	201.249	6.09104	17.8248	2.40879	0.38664
					201.07	201.25	7.05722	21.2653	2.87286	0.53868
					201.071	201.251	7.71866	23.8915	3.54629	0.56844
					201.072	201.252	8.55773	24.8399	3.05857	0.60054
					201.074	201.254	8.07898	22.619	3.01329	0.50796
					201.075	201.255	10.1468	23.3736	3.91093	0.57216
					201.076	201.256	8.36418	24.7251	2.37229	0.58932
					201.077	201.257	7.35454	20.8376	3.27993	0.52008
					201.078	201.258	7.33542	21.6511	3.38207	0.51336
					201.079	201.259	7.98819	19.2992	2.85071	0.4605
					201.08	201.26	6.91142	19.0307	3.70786	0.45852
					201.081	201.261	4.38104	13.7144	4.442	0.30882
					201.082	201.262	8.19656	18.2129	3.13036	0.41082
					201.083	201.263	6.74338	19.0496	3.42836	0.4617
					201.084	201.264	7.32664	19.3593	6.875	0.48672
					201.086	201.266	8.20747	22.4998	4.85936	0.56634
					201.087	201.267	8.62618	23.9467	3.69386	0.58158
					201.088	201.268	8.06882	20.779	4.01271	0.50052
					201.089	201.269	8.14283	21.8372	5.05486	0.52566
					201.09	201.27	8.15972	20.4457	4.99707	0.5037
					201.091	201.271	8.31129	22.1062	4.9865	0.52554
					201.092	201.272	8.49028	21.1057	4.89764	0.48282
					201.093	201.273	7.10894	17.4916	2.28736	0.3291
					201.094	201.274	9.29451	25.436	2.28636	0.50028
					201.095	201.275	8.77008	27.0152	2.92464	0.59406
					201.097	201.277	9.14183	25.1686	3.06421	0.54144
					201.098	201.278	7.09862	24.3367	2.83764	0.55902
					201.099	201.279	8.21954	24.3729	5.25857	0.55548
					201.1	201.28	7.3116	18.83	6.59064	0.46656
					201.101	201.281	7.90078	20.6304	6.34514	0.5154
					201.102	201.282	7.78881	22.9285	4.57429	0.56232
					201.103	201.283	9.01546	25.8361	2.5365	0.58542
					201.104	201.284	8.94626	23.9716	3.98043	0.61494
					201.105	201.285	8.34146	24.8238	3.37186	0.62028
					201.106	201.286	7.81338	23.5348	3.03479	0.54228
					201.107	201.287	8.72751	24.7427	3.60514	0.59832
					201.109	201.289	8.20276	24.7859	4.00879	0.60012
					201.11	201.29	8.46874	23.852	4.471	0.56178
					201.111	201.291	8.61401	23.0646	5.56886	0.5757
					201.112	201.292	8.50881	22.3721	5.20693	0.55836
					201.113	201.293	7.58885	20.8312	5.8255	0.52884
					201.114	201.294	8.5905	23.0144	5.02129	0.57366
					201.115	201.295	6.42446	20.4338	5.67193	0.51558
					201.116	201.296	8.67865	22.9692	6.15614	0.58494
					201.117	201.297	9.66097	22.6917	5.55786	0.56736
					201.118	201.298	7.06664	19.6444	6.28007	0.5115
					201.119	201.299	7.51151	21.5564	7.231	0.52548
					201.121	201.301	6.49451	20.6239	6.70429	0.50472
					201.122	201.302	9.13775	21.3567	7.21621	0.5505
					201.123	201.303	8.51008	21.6553	6.6315	0.53052
					201.124	201.304	8.00301	20.9741	7.70071	0.51636
					201.125	201.305	8.35089	21.2356	8.14879	0.52068
					201.126	201.306	9.17841	20.9999	8.89936	0.49554
					201.127	201.307	7.55036	21.939	7.70057	0.50238
					201.128	201.308	8.56832	20.7367	8.26379	0.4938
					201.129	201.309	7.53951	19.2393	8.59986	0.49266
					201.13	201.31	8.00566	21.4015	6.9115	0.53148
					201.132	201.312	8.48202	23.2333	5.38386	0.56472
					201.133	201.313	8.3259	22.2413	5.86793	0.5367
					201.134	201.314	8.61755	23.7588	5.2865	0.57594
					201.135	201.315	8.08343	23.1376	5.06607	0.59892
					201.136	201.316	7.10756	21.3075	5.14457	0.52218
					201.137	201.317	7.93387	21.5679	6.29271	0.55278
					201.138	201.318	8.9721	23.1473	5.63936	0.57582
					201.139	201.319	8.38376	22.3621	5.09743	0.55062
					201.14	201.32	7.55735	21.8682	4.76336	0.52488
					201.141	201.321	8.75674	23.2957	5.29357	0.56778
					201.142	201.322	8.41828	22.9696	5.28564	0.56166
					201.144	201.324	8.18672	24.1773	4.90636	0.55242
					201.145	201.325	8.40394	23.2233	5.38779	0.58308
					201.146	201.326	7.38572	22.4	5.2905	0.54804
					201.147	201.327	8.79686	22.3892	6.09221	0.56586
					201.148	201.328	8.15464	22.2168	6.022	0.5757
					201.149	201.329	8.07168	22.317	5.25064	0.52734
					201.15	201.33	7.41092	20.6968	5.96479	0.53604
					201.151	201.331	8.19222	21.7854	6.21857	0.53748
					201.152	201.332	6.68409	20.522	5.07643	0.51096
					201.153	201.333	6.70998	17.2388	4.81793	0.42312
					201.154	201.334	8.28217	20.2825	5.49307	0.53034
					201.156	201.336	7.5267	19.5072	5.77864	0.50802
					201.157	201.337	8.34713	22.3621	5.64236	0.56982
					201.158	201.338	8.37143	19.9173	5.90429	0.53262
					201.159	201.339	7.22314	20.7266	5.36293	0.50856
					201.16	201.34	6.41054	20.6498	5.185	0.51828
					201.161	201.341	9.1638	22.8284	5.18871	0.5643
					201.162	201.342	8.18174	21.0877	5.82579	0.54246
					201.163	201.343	7.87161	21.8843	5.11414	0.5649
					201.164	201.344	6.80257	18.5301	7.06586	0.45426
					201.165	201.345	8.60119	22.7619	5.50757	0.55008
					201.167	201.347	8.34866	24.0544	4.51064	0.56922
					201.168	201.348	8.55106	22.9025	5.37	0.57552
					201.169	201.349	7.35761	20.7141	5.38564	0.5331
					201.17	201.35	7.01767	22.4744	4.58314	0.5583
					201.171	201.351	8.64037	21.6632	4.38243	0.5475
					201.172	201.352	7.28254	21.8328	4.52136	0.53868
					201.173	201.353	7.6563	20.5669	4.99843	0.50046
					201.174	201.354	7.69934	21.8991	4.58471	0.54264
					201.175	201.355	7.37735	23.805	3.8285	0.58842
					201.176	201.356	8.03859	23.8836	2.59014	0.57516
					201.177	201.357	9.08243	22.0254	3.69429	0.54852
					201.179	201.359	7.79755	22.2773	2.96836	0.55944
					201.18	201.36	6.33457	19.6851	2.83757	0.51348
					201.181	201.361	6.43436	19.4547	2.074	0.45372
					201.182	201.362	8.47932	24.1666	2.55257	0.5331
					201.183	201.363	7.54862	22.1599	3.6195	0.54984
					201.184	201.364	8.39425	23.4984	4.87907	0.56604
					201.185	201.365	7.85478	23.5361	4.39121	0.56286
					201.186	201.366	7.25453	21.9235	2.37857	0.48234
					201.187	201.367	8.02763	23.2562	2.63821	0.53316
					201.188	201.368	5.71976	19.9419	3.11521	0.46164
					201.19	201.37	8.4825	24.7422	1.51371	0.55788
					201.191	201.371	8.05352	22.7643	2.59543	0.54954
					201.192	201.372	7.96214	21.0029	4.07157	0.53718
					201.193	201.373	7.32362	20.2377	2.91193	0.49092
					201.194	201.374	8.00598	20.9923	2.64636	0.51414
					201.195	201.375	7.95325	18.4616	3.37386	0.47544
					201.196	201.376	5.84889	13.3122	3.91921	0.37632
					201.197	201.377	6.49361	14.7323	4.79279	0.4251
					201.198	201.378	7.16532	14.9148	4.88943	0.4473
					201.199	201.379	6.19629	11.1099	4.56386	0.3852
					201.2	201.38	5.24414	10.3272	4.3305	0.31872
					201.202	201.382	5.68583	9.71409	2.90564	0.28998
					201.203	201.383	6.44151	8.39379	2.97964	0.24306
					201.204	201.384	6.19073	9.17443	3.51429	0.24522
					201.205	201.385	5.13037	7.91499	3.07807	0.225
					201.206	201.386	6.17305	6.23975	3.24329	0.17322
					201.207	201.387	5.41403	4.29646	1.65893	0.1386
					201.208	201.388	6.78727	10.3932	2.96014	0.36768
					201.209	201.389	6.24833	15.0102	2.62921	0.49788
					201.21	201.39	7.48408	18.8092	3.228	0.55386
					201.211	201.391	7.71686	19.7168	3.94114	0.50628
					201.212	201.392	7.4808	19.1716	5.15121	0.52074
					201.214	201.394	7.00025	20.0754	4.06493	0.50376
					201.215	201.395	6.37062	16.8881	4.1885	0.45114
					201.216	201.396	8.03038	21.007	4.63114	0.55356
					201.217	201.397	6.92206	21.8615	3.97129	0.53826
					201.218	201.398	7.76393	20.7785	4.9405	0.52488
					201.219	201.399	7.39234	19.6338	5.5075	0.48582
					201.22	201.4	5.97235	19.7532	3.29721	0.45954
					201.221	201.401	7.69066	20.3334	3.32736	0.50076
					201.222	201.402	5.78292	18.5619	3.78921	0.44832
					201.223	201.403	5.55904	15.6108	3.2	0.36936
					201.225	201.405	6.55285	19.4973	3.66657	0.45786
					201.226	201.406	8.09656	20.709	3.9025	0.50388
					201.227	201.407	7.08909	22.6461	4.46793	0.50892
					201.228	201.408	7.79204	22.5418	3.93557	0.50352
					201.229	201.409	9.07184	23.0177	3.84693	0.56238
					201.23	201.41	8.78749	22.8044	3.334	0.51828
					201.231	201.411	7.99115	20.5338	2.79129	0.51258
					201.232	201.412	7.79411	22.0296	3.92236	0.51216
					201.233	201.413	7.83238	24.1939	3.4085	0.53622
					201.234	201.414	8.00434	20.8916	3.73964	0.50406
					201.235	201.415	8.08502	22.0583	3.575	0.50952
					201.237	201.417	7.08469	19.8333	2.64957	0.44946
					201.238	201.418	6.86779	18.9494	3.52971	0.45348
					201.239	201.419	7.18534	24.0004	4.49271	0.57168
					201.24	201.42	7.5105	22.3904	3.75521	0.51906
					201.241	201.421	8.58775	24.4675	3.14243	0.55002
					201.242	201.422	7.99454	21.8793	3.43057	0.5043
					201.243	201.423	8.27285	22.4693	3.87214	0.51354
					201.244	201.424	7.71745	21.1502	3.14464	0.47712
					201.245	201.425	7.20752	21.9285	2.54821	0.50556
					201.246	201.426	7.69129	22.8535	2.05036	0.53694
					201.247	201.427	8.93165	25.031	2.22414	0.62028
					201.249	201.429	8.31325	25.0828	2.14736	0.57756
					201.25	201.43	8.33464	23.589	2.62164	0.54444
					201.251	201.431	8.41458	25.207	3.28507	0.55728
					201.252	201.432	8.66086	23.7251	2.996	0.54984
					201.253	201.433	7.27465	20.2355	2.50936	0.40998
					201.254	201.434	9.66621	25.1166	2.60607	0.57324
					201.255	201.435	8.7183	25.5165	2.88529	0.5907
					201.256	201.436	7.51479	23.5456	2.4725	0.52638
					201.257	201.437	8.91233	23.7001	2.59471	0.56304
					201.258	201.438	6.75492	17.0411	2.38293	0.42042
					201.26	201.44	9.09244	20.4569	3.21243	0.49038
					201.261	201.441	7.70972	21.8826	3.1075	0.52044
					201.262	201.442	5.78647	17.6112	2.66271	0.43206
					201.263	201.443	6.26569	16.4687	2.2145	0.4134
					201.264	201.444	6.70754	17.1156	2.29236	0.41724
					201.265	201.445	6.2037	17.263	2.92814	0.44166
					201.266	201.446	8.58034	20.3442	3.4935	0.4707
					201.267	201.447	8.76081	23.6007	3.03721	0.55914
					201.268	201.448	6.85551	19.8492	2.99079	0.41934
					201.269	201.449	8.65874	24.1717	3.157	0.56004
					201.27	201.45	7.13414	19.9399	3.06657	0.46326
					201.272	201.452	7.8453	21.805	2.72893	0.47958
					201.273	201.453	7.88501	22.8522	2.86836	0.54114
					201.274	201.454	8.17909	22.0299	2.54207	0.49218
					201.275	201.455	6.99776	20.4801	2.10521	0.42846
					201.276	201.456	9.20086	25.5361	2.646	0.57444
					201.277	201.457	9.27143	24.737	2.89893	0.56436
					201.278	201.458	8.15104	22.0256	2.88607	0.50352
					201.279	201.459	8.53957	23.9937	2.75271	0.52842
					201.28	201.46	9.14315	22.9606	3.07686	0.51432
					201.281	201.461	8.55948	21.5439	3.97629	0.46056
					201.282	201.462	7.19121	20.6983	1.74257	0.47358
					201.284	201.464	7.02911	20.756	1.331	0.48426
					201.285	201.465	5.93539	18.6995	1.2105	0.42954
					201.286	201.466	7.24886	21.7234	1.55614	0.5037
					201.287	201.467	7.02318	19.992	2.004	0.4743
					201.288	201.468	8.70083	24.9693	1.30907	0.55944
					201.289	201.469	7.60309	21.958	1.16371	0.47862
					201.29	201.47	7.28365	19.8848	1.15743	0.43038
					201.291	201.471	8.35406	22.5282	1.71821	0.50766
					201.292	201.472	8.17719	22.8948	1.51114	0.4872
					201.293	201.473	7.61755	22.3958	2.11893	0.49044
					201.295	201.475	8.42644	25.7266	1.45143	0.56736
					201.296	201.476	7.452	21.2307	1.5975	0.50172
					201.297	201.477	7.03345	20.6496	0.868786	0.46692
					201.298	201.478	8.22944	23.6213	0.689857	0.52986
					201.299	201.479	8.25019	23.8373	0.626	0.53802
					201.3	201.48	8.07978	24.0089	0.658571	0.5187
					201.301	201.481	7.12784	20.8278	0.9595	0.49062
					201.302	201.482	4.62372	16.1324	1.383	0.4299
					201.303	201.483	7.22896	20.0085	2.16764	0.49584
					201.304	201.484	6.99464	19.748	2.108	0.4902
					201.305	201.485	7.51008	22.8739	2.12264	0.52716
					201.307	201.487	8.56895	22.4689	3.34943	0.49476
					201.308	201.488	8.65689	27.4552	2.79386	0.61764
					201.309	201.489	8.87045	29.1151	2.16407	0.69906
					201.31	201.49	7.74836	25.843	2.95379	0.58884
					201.311	201.491	8.23659	24.8613	1.72829	0.53988
					201.312	201.492	9.27736	26.3243	2.09779	0.57504
					201.313	201.493	8.70369	25.0523	1.74164	0.50076
					201.314	201.494	7.96399	22.9692	4.50914	0.49428
					201.315	201.495	9.52428	26.2554	2.51357	0.54882
					201.316	201.496	7.84064	25.1571	1.44379	0.54648
					201.317	201.497	9.85638	25.9593	1.18921	0.56208
					201.319	201.499	8.08009	23.1705	1.19093	0.4962
					201.32	201.5	8.25438	22.7092	1.351	0.50592
					201.321	201.501	7.49409	24.9666	1.78086	0.55128
					201.322	201.502	8.9505	23.5835	3.04193	0.54408
					201.323	201.503	8.32696	23.3784	3.42814	0.54264
					201.324	201.504	9.06279	21.1948	8.575	0.54462
					201.325	201.505	7.48223	20.9144	8.5345	0.52404
					201.326	201.506	8.58791	23.8312	6.464	0.60216
					201.327	201.507	7.48985	23.5604	2.79657	0.57162
					201.328	201.508	8.10609	26.2775	2.94164	0.64362
					201.33	201.51	9.17905	26.1765	2.89857	0.59862
					201.331	201.511	9.26926	24.6841	3.30579	0.55944
					201.332	201.512	8.28821	23.65	3.35357	0.53514
					201.333	201.513	8.48382	25.1986	3.47464	0.5829
					201.334	201.514	8.34131	23.3423	5.32714	0.54384
					201.335	201.515	7.34135	23.4701	3.37971	0.55998
					201.336	201.516	10.1626	25.6943	2.58043	0.60732
					201.337	201.517	9.04643	26.1982	2.1775	0.60282
					201.338	201.518	8.98412	26.2871	2.46593	0.55818
					201.339	201.519	8.80555	28.8573	1.6905	0.62352
					201.34	201.52	8.65869	28.3125	1.86471	0.62004
					201.342	201.522	10.2316	26.9673	1.81571	0.57288
					201.343	201.523	9.17931	27.1999	1.99343	0.5871
					201.344	201.524	9.07036	27.4771	1.99921	0.58878
					201.345	201.525	9.15401	26.8553	1.61707	0.59718
					201.346	201.526	9.65891	27.2016	1.49164	0.60378
					201.347	201.527	9.33649	27.1646	1.478	0.59502
					201.348	201.528	9.22886	27.7162	1.543	0.603
					201.349	201.529	9.67532	27.0965	1.50757	0.5994
					201.35	201.53	9.77601	27.5409	1.38107	0.6078
					201.351	201.531	8.82566	27.3516	2.01686	0.58782
					201.352	201.532	8.69072	28.3543	1.58907	0.62796
					201.354	201.534	9.26566	28.2935	1.43621	0.62766
					201.355	201.535	9.36048	27.7682	1.9135	0.59658
					201.356	201.536	8.73111	28.693	1.208	0.63048
					201.357	201.537	10.2126	27.3345	1.24171	0.56988
					201.358	201.538	9.73901	26.7846	1.39964	0.62544
					201.359	201.539	9.83435	25.611	1.57243	0.57012
					201.36	201.54	8.85499	27.4894	1.81457	0.61146
					201.361	201.541	8.73228	26.3884	2.88771	0.59316
					201.362	201.542	8.24633	23.825	3.08136	0.51294
					201.363	201.543	7.69262	21.6437	1.36579	0.49062
					201.365	201.545	6.81438	16.9665	1.01371	0.33894
					201.366	201.546	7.06675	18.3081	2.36921	0.42114
					201.367	201.547	7.27338	24.8264	3.04543	0.5763
					201.368	201.548	7.0443	21.5582	8.21236	0.47394
					201.369	201.549	8.72566	27.1264	4.36929	0.5787
					201.37	201.55	9.34311	27.0163	3.91243	0.558
					201.371	201.551	8.87834	25.2331	4.36307	0.54042
					201.372	201.552	9.03928	24.7316	4.95729	0.53574
					201.373	201.553	8.19858	23.8844	3.92036	0.47976
					201.374	201.554	7.81142	25.537	4.78107	0.56388
					201.375	201.555	8.68971	25.6995	5.50379	0.5757
					201.377	201.557	9.54635	25.6015	4.7795	0.56292
					201.378	201.558	8.73074	25.6748	5.27436	0.55632
					201.379	201.559	9.04209	23.9967	6.39186	0.52758
					201.38	201.56	7.93244	24.7219	6.20136	0.57564
					201.381	201.561	8.12578	22.4146	9.70629	0.51486
					201.382	201.562	8.37461	24.3489	7.19407	0.54318
					201.383	201.563	7.12451	18.8558	12.5458	0.46344
					201.384	201.564	7.47296	19.3944	14.3071	0.45744
					201.385	201.565	7.52363	21.8923	9.96714	0.49626
					201.386	201.566	8.5446	22.8249	7.46829	0.54432
					201.387	201.567	7.85022	20.935	9.92964	0.49398
					201.389	201.569	6.11105	22.2692	7.287	0.50568
					201.39	201.57	8.84059	22.8526	5.43493	0.53046
					201.391	201.571	7.09295	23.2267	5.36307	0.52404
					201.392	201.572	8.72624	23.8407	7.513	0.56682
					201.393	201.573	6.99671	22.5986	8.4885	0.52584
					201.394	201.574	7.91508	23.4026	7.39036	0.52644
					201.395	201.575	8.7336	24.192	6.87171	0.5313
					201.396	201.576	8.24358	24.4511	7.383	0.57174
					201.397	201.577	8.58574	22.9796	7.19893	0.55866
					201.398	201.578	8.53931	22.9016	8.15586	0.54516
					201.4	201.58	8.72344	23.6308	9.26786	0.53244
					201.401	201.581	8.10826	23.3899	7.53814	0.52422
					201.402	201.582	8.847	24.2403	7.1815	0.53592
					201.403	201.583	7.80099	22.582	6.89529	0.49908
					201.404	201.584	7.26385	23.1169	8.542	0.49902
					201.405	201.585	8.92207	23.22	9.39743	0.51396
					201.406	201.586	7.49965	22.0167	10.7449	0.46632
					201.407	201.587	8.45132	22.5249	9.52379	0.50184
					201.408	201.588	8.37852	23.7327	9.63393	0.54264
					201.409	201.589	9.1161	23.1385	9.81707	0.53436
					201.41	201.59	8.19212	24.559	8.92707	0.55476
					201.412	201.592	8.57986	25.4362	8.78443	0.54768
					201.413	201.593	8.85192	23.9852	10.6289	0.54606
					201.414	201.594	8.75525	22.7555	11.6164	0.49866
					201.415	201.595	7.36904	19.0228	15.6881	0.40206
					201.416	201.596	5.94069	12.0753	24.0092	0.23394
					201.417	201.597	4.59741	6.09341	25.9652	0.10788
					201.418	201.598	4.62981	5.24585	27.37	0.08598
					201.419	201.599	4.69731	5.03333	27.768	0.0798
					201.42	201.6	4.77058	4.37654	28.4564	0.05892
					201.421	201.601	3.69969	4.69037	27.4771	0.0597
					201.422	201.602	5.88341	4.44304	30.1994	0.075
					201.424	201.604	4.55734	4.13621	27.7609	0.05388
					201.425	201.605	3.64945	4.65402	27.6205	0.0549
					201.426	201.606	5.15462	4.96155	29.8529	0.06144
					201.427	201.607	5.98299	5.07831	30.0241	0.07494
					201.428	201.608	5.18119	5.15051	29.7026	0.06942
					201.429	201.609	5.30534	4.59527	29.2504	0.0669
					201.43	201.61	5.50504	5.05148	29.4373	0.07584
					201.431	201.611	4.52711	5.79161	29.9119	0.07434
					201.432	201.612	4.45076	5.34011	28.8216	0.07836
					201.433	201.613	4.61996	4.97369	28.9988	0.07902
					201.435	201.615	4.50863	5.65367	30.0547	0.09432
					201.436	201.616	5.24695	5.93502	30.3248	0.10512
					201.437	201.617	5.19448	5.85121	30.0077	0.09912
					201.438	201.618	4.83517	5.51371	29.8883	0.09432
					201.439	201.619	4.09346	5.66538	28.9134	0.09882
					201.44	201.62	6.14621	17.015	5.60914	0.4956
					201.441	201.621	5.50159	18.1974	5.41779	0.4971
					201.442	201.622	6.90088	19.3662	5.65914	0.47568
					201.443	201.623	7.81396	19.9255	6.87829	0.45024
					201.444	201.624	5.86016	18.8959	6.48293	0.48408
					201.445	201.625	6.66588	18.3603	7.54129	0.50556
					201.446	201.626	7.75144	17.8518	7.58871	0.54666
					201.447	201.627	6.38005	15.9245	7.51171	0.4875
					201.448	201.628	6.63766	17.1329	7.44243	0.52494
					201.449	201.629	6.62644	16.9666	7.93293	0.50904
					201.45	201.63	6.10306	17.827	7.81879	0.51792
					201.451	201.631	5.67344	17.6938	7.93293	0.47214
					201.452	201.632	5.06149	15.7341	7.99143	0.4629
					201.453	201.633	6.98702	16.8241	9.28571	0.49884
					201.454	201.634	4.9869	13.9089	8.38407	0.42114
					201.456	201.636	5.54765	15.4845	8.46707	0.45888
					201.457	201.637	5.45315	14.7075	8.53036	0.45144
					201.458	201.638	5.39386	14.1806	8.18979	0.43674
					201.459	201.639	5.73194	14.3106	8.91121	0.4689
					201.46	201.64	5.48365	14.087	8.51021	0.43902
					201.461	201.641	5.18818	13.6686	8.62071	0.43698
					201.462	201.642	6.24616	14.8814	8.03929	0.44442
					201.463	201.643	5.91533	13.8255	8.21557	0.45894
					201.464	201.644	6.30609	15.0931	9.35529	0.45906
					201.465	201.645	5.41366	15.9644	8.33879	0.42492
					201.466	201.646	5.17818	14.6974	10.6698	0.41424
					201.467	201.647	5.88436	14.2073	10.9518	0.37938
					201.468	201.648	7.43379	16.8012	9.54971	0.48078
					201.469	201.649	7.56064	20.0755	6.5125	0.54294
					201.47	201.65	7.48969	22.1618	5.5955	0.56622
					201.471	201.651	7.94314	21.3082	4.51336	0.5742
					201.472	201.652	7.70988	22.2745	3.14393	0.57048
					201.473	201.653	5.75571	13.1182	0.664357	0.35508
					201.474	201.654	6.74005	13.0709	0.696929	0.37542
					201.475	201.655	5.32488	13.2452	0.6365	0.36186
					201.476	201.656	5.40026	12.1393	0.653286	0.33888
					201.477	201.657	5.61134	11.6492	0.64	0.3222
					201.478	201.658	6.68875	11.6346	0.824929	0.31596
					201.479	201.659	6.54554	11.8723	0.944714	0.2844
					201.48	201.66	5.42753	12.6128	0.833643	0.3123
					201.481	201.661	5.56878	14.712	0.442786	0.3474
					201.482	201.662	4.90426	13.9487	0.430214	0.2949
					201.483	201.663	4.93676	15.36	0.498714	0.34182
					201.484	201.664	6.97235	16.7237	0.793571	0.39744
					201.486	201.666	5.73475	16.7058	0.985929	0.39822
					201.487	201.667	5.38915	15.6338	0.958	0.37062
					201.488	201.668	5.86392	16.2197	0.951286	0.34842
					201.489	201.669	6.85715	17.5941	0.894357	0.37374
					201.49	201.67	7.52141	18.5401	0.906357	0.42072
					201.491	201.671	5.1021	14.5174	0.535214	0.28842
					201.492	201.672	4.23784	14.7079	0.384357	0.31824
					201.493	201.673	7.25199	16.2119	0.584	0.38286
					201.494	201.674	4.86334	10.8685	0.470429	0.2172
					201.495	201.675	5.2038	14.6327	0.792143	0.33198
					201.496	201.676	5.02984	15.6518	0.810571	0.36222
					201.497	201.677	5.8005	15.6583	0.9065	0.35706
					201.498	201.678	6.38201	15.2164	1.0735	0.37656
					201.499	201.679	5.72395	15.8211	0.9255	0.39966
					201.5	201.68	6.83714	16.918	0.910929	0.41262
					201.501	201.681	6.13276	16.0246	0.761071	0.37302
					201.502	201.682	6.41102	17.2373	0.944429	0.40164
					201.503	201.683	6.57355	16.8604	0.875786	0.4098
					201.504	201.684	6.13535	15.6392	0.565857	0.31482
					201.505	201.685	6.20036	16.8592	0.687071	0.39414
					201.506	201.686	8.03298	22.0366	0.986429	0.52656
					201.507	201.687	7.00158	20.6519	1.15707	0.4878
					201.508	201.688	7.46592	22.2405	0.926143	0.4827
					201.509	201.689	7.12805	20.7469	0.966929	0.47262
					201.51	201.69	9.18111	27.853	0.968571	0.6306
					201.511	201.691	10.6351	26.4829	0.942071	0.60576
					201.512	201.692	4.54521	4.47309	31.9897	0.06012
					201.513	201.693	5.98304	3.47877	34.1332	0.05892
					201.514	201.694	6.17135	2.90094	32.5727	0.06168
					201.515	201.695	6.31048	3.79302	32.6351	0.06102
					201.517	201.697	4.85714	3.28048	29.7289	0.05742
					201.518	201.698	4.97398	3.43107	29.1938	0.05496
					201.519	201.699	4.57025	3.66137	31.2209	0.05334
					201.52	201.7	6.35209	4.09122	31.993	0.09162
					201.521	201.701	4.66608	4.15058	30.4865	0.06762
					201.522	201.702	5.66211	3.41768	30.607	0.06072
					201.523	201.703	5.85302	2.569	31.9509	0.0324
					201.524	201.704	5.40847	3.01443	32.3666	0.04062
					201.525	201.705	6.26919	3.98599	32.6267	0.04668
					201.526	201.706	4.74628	3.71999	30.67	0.0522
					201.527	201.707	5.26362	2.69477	29.5236	0.04818
					201.528	201.708	4.53791	2.72188	28.4431	0.03984
					201.529	201.709	3.98096	2.82814	28.3328	0.0279
					201.53	201.71	5.83581	2.81111	31.7496	0.027
					201.531	201.711	4.85804	2.57087	31.1729	0.0234
					201.532	201.712	5.34346	2.36063	30.5006	0.0303
					201.533	201.713	4.75369	3.0772	30.2721	0.04542
					201.534	201.714	4.80034	2.80495	29.8612	0.05526
					201.535	201.715	4.69382	3.75942	31.2603	0.0504
					201.536	201.716	5.55062	3.77375	32.6097	0.04902
					201.537	201.717	4.31756	3.25005	30.2481	0.04128
					201.538	201.718	6.07982	3.32607	33.3118	0.04542
					201.539	201.719	5.21688	3.1073	31.7473	0.03306
					201.54	201.72	4.78562	3.27698	30.865	0.04908
					201.541	201.721	5.18776	3.49678	31.0566	0.05142
					201.542	201.722	4.61668	3.73907	31.0574	0.0456
					201.543	201.723	4.94545	4.36954	31.9741	0.06
					201.544	201.724	4.27156	2.93286	28.2687	0.03492
					201.545	201.725	4.49375	2.69346	30.0944	0.02742
					201.547	201.727	5.63771	3.78061	31.6347	0.04674
					201.548	201.728	4.80515	2.48757	28.8659	0.04842
					201.549	201.729	4.44018	2.96352	29.0774	0.0438
					201.55	201.73	4.94259	3.06073	30.3386	0.04038
					201.551	201.731	5.96372	3.01742	32.1635	0.0417
					201.552	201.732	4.80372	2.82828	30.6009	0.04434
					201.553	201.733	4.04412	3.68251	30.4505	0.0384
					201.554	201.734	4.59551	2.86622	29.7481	0.04644
					201.555	201.735	4.34001	2.99959	32.0497	0.0609
					201.556	201.736	4.77471	3.47051	33.6484	0.07116
					201.557	201.737	5.52499	2.98998	34.7852	0.11154
					201.558	201.738	4.50964	3.0002	32.1515	0.075
					201.559	201.739	4.71272	2.50166	30.7698	0.05142
					201.56	201.74	4.92094	3.93587	32.0344	0.0513
					201.561	201.741	4.34584	3.37797	29.4971	0.05874
					201.562	201.742	4.42694	2.41178	31.1216	0.02958
					201.563	201.743	4.59037	3.49132	32.6865	0.02622
					201.564	201.744	5.00363	2.80299	31.9523	0.03852
					201.565	201.745	5.37972	3.04458	32.6393	0.03312
					201.566	201.746	3.83098	2.86277	29.8654	0.03966
					201.567	201.747	5.89865	2.39139	33.8674	0.0342
					201.568	201.748	5.65512	2.76845	32.3899	0.04308
					201.569	201.749	4.99384	2.95783	31.5312	0.04002
					201.57	201.75	5.30984	3.07813	32.7337	0.04278
					201.571	201.751	5.05832	2.91811	30.9052	0.04572
					201.572	201.752	3.76417	2.65949	29.4274	0.04374
					201.573	201.753	5.34584	3.06745	31.4466	0.0474
					201.574	201.754	4.17833	3.59123	30.8921	0.03696
					201.575	201.755	4.85772	2.48738	29.9664	0.03324
					201.577	201.757	5.60054	2.80289	30.9721	0.04158
					201.578	201.758	3.96434	3.18845	28.9294	0.03168
					201.579	201.759	4.51678	2.69939	29.2659	0.03132
					201.58	201.76	4.7817	3.16633	30.0987	0.03348
					201.581	201.761	3.67158	2.73397	27.9459	0.0333
					201.582	201.762	5.37353	3.20091	29.5431	0.03972
					201.583	201.763	4.90934	2.4248	28.2352	0.02886
					201.584	201.764	5.26611	5.27702	26.9806	0.0852
					201.585	201.765	7.71761	10.8801	22.9181	0.2388
					201.586	201.766	6.44315	14.0956	17.2844	0.3378
					201.587	201.767	7.38222	19.8193	8.49779	0.46626
					201.588	201.768	7.69299	23.1127	2.77271	0.54978
					201.589	201.769	7.70776	22.4063	2.23921	0.5601
					201.59	201.77	8.4609	22.0983	2.09229	0.5655
					201.591	201.771	7.60722	19.6136	2.18043	0.5166
					201.592	201.772	7.9254	20.4714	2.18479	0.54684
					201.593	201.773	7.2585	21.6984	1.9625	0.54978
					201.594	201.774	7.82931	24.1164	2.57614	0.56484
					201.595	201.775	7.36438	20.9688	3.34621	0.54426
					201.596	201.776	6.66275	21.3854	3.41571	0.5481
					201.597	201.777	7.68923	21.4695	3.57086	0.55782
					201.598	201.778	7.07479	19.057	3.16529	0.50586
					201.599	201.779	7.13869	20.6524	2.11407	0.54252
					201.6	201.78	6.28237	19.2437	2.61207	0.49764
					201.601	201.781	7.93885	20.8803	2.97257	0.54618
					201.602	201.782	7.34839	19.9073	2.95207	0.5265
					201.603	201.783	6.41801	19.3899	3.12679	0.50304
					201.604	201.784	5.72305	16.9594	3.44871	0.47352
					201.605	201.785	6.59801	19.5706	3.12064	0.51642
					201.607	201.787	6.8067	20.2807	2.7555	0.52122
					201.608	201.788	6.03222	15.2247	1.22493	0.33504
					201.609	201.789	5.55152	17.4092	1.50821	0.43092
					201.61	201.79	8.19979	23.9452	1.80686	0.6051
					201.611	201.791	6.58991	17.6902	1.411	0.45096
					201.612	201.792	7.89644	21.9595	1.57543	0.5592
					201.613	201.793	6.6267	22.4118	0.953643	0.5454
					201.614	201.794	6.76016	18.5701	0.780214	0.4986
					201.615	201.795	6.98416	20.3548	1.00371	0.54006
					201.616	201.796	6.84656	17.8949	1.12121	0.49956
					201.617	201.797	6.22133	16.3835	0.872643	0.43872
					201.618	201.798	6.81999	17.2698	0.952786	0.43056
					201.619	201.799	7.10555	18.8401	1.12879	0.50628
					201.62	201.8	4.85524	13.6423	0.737286	0.31752
					201.621	201.801	6.01714	15.4889	0.780571	0.35592
					201.622	201.802	6.47169	18.2568	1.0515	0.46686
					201.623	201.803	7.00417	19.7908	1.2695	0.50592
					201.624	201.804	7.41685	19.9548	1.51643	0.52128
					201.625	201.805	8.45825	22.442	1.00657	0.52008
					201.626	201.806	5.61648	18.0193	0.688643	0.42744
					201.627	201.807	6.15356	13.7918	0.7355	0.3624
					201.628	201.808	6.32462	13.6537	0.638357	0.34788
					201.629	201.809	6.75799	12.2689	0.479857	0.30606
					201.63	201.81	6.17813	13.594	0.535929	0.34986
					201.631	201.811	5.67471	11.4868	0.334571	0.30774
					201.632	201.812	5.2434	11.7054	0.334214	0.3273
					201.633	201.813	5.85773	16.0685	0.596214	0.3963
					201.634	201.814	6.61728	12.1989	0.297071	0.30498
					201.635	201.815	5.38708	11.1568	0.315286	0.28662
					201.637	201.817	5.2902	14.9104	0.433786	0.38418
					201.638	201.818	5.80039	12.8241	0.460143	0.35052
					201.639	201.819	4.4748	14.4274	0.310071	0.37008
					201.64	201.82	6.47545	17.9316	0.447643	0.4461
					201.641	201.821	6.03254	20.6089	0.750143	0.48672
					201.642	201.822	7.58388	19.4993	0.991643	0.46008
					201.643	201.823	6.31032	18.242	1.08236	0.46932
					201.644	201.824	7.41383	18.6277	1.11829	0.48684
					201.645	201.825	5.5665	18.5877	0.924071	0.46572
					201.646	201.826	5.84989	17.8372	0.8405	0.42846
					201.647	201.827	7.25686	17.1274	0.832143	0.41928
					201.648	201.828	6.86181	16.5264	1.17993	0.42144
					201.649	201.829	6.13016	18.062	1.56929	0.44286
					201.65	201.83	6.91391	16.9664	0.951	0.43578
					201.651	201.831	5.80961	13.6405	0.804786	0.30594
					201.652	201.832	6.14769	16.4051	1.37879	0.45432
					201.653	201.833	5.54919	15.4452	1.34386	0.4068
					201.654	201.834	7.21429	19.2252	1.955	0.49044
					201.655	201.835	6.18644	17.2963	1.711	0.4362
					201.656	201.836	5.60456	15.3896	1.56379	0.42438
					201.657	201.837	6.35855	16.0121	1.70721	0.40506
					201.658	201.838	6.35575	19.0514	1.74679	0.4911
					201.659	201.839	6.02036	18.8269	2.00493	0.48246
					201.66	201.84	7.51616	20.7066	2.17993	0.50148
					201.661	201.841	8.17708	22.83	2.20993	0.53298
					201.662	201.842	7.4286	23.5025	2.15157	0.54618
					201.663	201.843	7.79183	23.0273	1.7525	0.54306
					201.664	201.844	8.55058	23.6696	1.96271	0.51528
					201.665	201.845	8.07544	23.2194	1.94564	0.5244
					201.666	201.846	6.87277	21.2333	2.82379	0.4926
					201.668	201.848	8.60765	23.1122	2.55286	0.5337
					201.669	201.849	8.15686	22.5036	1.59243	0.50844
					201.67	201.85	7.70612	23.6846	2.05714	0.51924
					201.671	201.851	8.85685	23.4364	1.55757	0.528
					201.672	201.852	7.67636	23.9419	1.9675	0.54648
					201.673	201.853	9.3924	30.4836	0.5295	0.67848
					201.674	201.854	9.60861	29.1652	0.457929	0.65652
					201.675	201.855	9.57505	29.158	0.138429	0.54534
					201.676	201.856	8.90021	27.8476	0.145	0.5556
					201.677	201.857	9.16634	27.499	0.201786	0.64206
					201.678	201.858	9.82535	27.8098	0.424429	0.62766
					201.679	201.859	9.77284	27.7754	0.321214	0.65922
					201.68	201.86	9.48404	27.463	0.252857	0.61884
					201.681	201.861	9.60914	28.3913	0.211714	0.62772
					201.682	201.862	10.2976	28.7678	0.215357	0.6363
					201.683	201.863	9.88782	29.2125	0.186929	0.62142
					201.684	201.864	9.34586	25.4122	0.74	0.58362
					201.685	201.865	7.58028	22.1335	1.46943	0.54258
					201.686	201.866	7.3629	20.4736	1.915	0.54012
					201.687	201.867	6.1983	19.065	2.63871	0.49248
					201.688	201.868	7.22705	19.0114	2.72493	0.4998
					201.689	201.869	7.10603	18.4612	2.426	0.46716
					201.69	201.87	6.50658	18.1595	2.57736	0.4884
					201.691	201.871	7.19126	19.5582	3.58257	0.51642
					201.692	201.872	7.76292	19.8127	3.83686	0.4998
					201.693	201.873	6.98178	18.59	4.47121	0.46362
					201.694	201.874	7.33812	18.7662	3.81221	0.46698
					201.695	201.875	7.02921	20.3025	3.87357	0.52086
					201.696	201.876	7.02868	21.0237	3.28043	0.52308
					201.698	201.878	8.45566	22.6069	3.41486	0.55434
					201.699	201.879	8.01598	22.5398	3.37064	0.552
					201.7	201.88	7.37741	21.2674	3.07657	0.5496
					201.701	201.881	6.99385	23.067	2.48786	0.5487
					201.702	201.882	8.33088	23.1617	2.43993	0.5205
					201.703	201.883	8.50039	21.5448	2.4905	0.52362
					201.704	201.884	6.26342	20.9625	2.425	0.50238
					201.705	201.885	7.79622	22.3797	1.57986	0.55884
					201.706	201.886	6.31657	20.6558	2.05221	0.50826
					201.707	201.887	7.83048	23.1591	2.55664	0.55956
					201.708	201.888	8.09952	21.5402	2.69043	0.50238
					201.709	201.889	9.00053	24.336	3.52707	0.5823
					201.71	201.89	7.80782	22.5131	3.34329	0.51756
					201.711	201.891	7.69399	21.4182	3.79943	0.52482
					201.712	201.892	7.67509	21.4124	3.531	0.54144
					201.713	201.893	7.28338	19.2508	4.02071	0.48474
					201.714	201.894	6.07865	18.6595	3.52807	0.45144
					201.715	201.895	8.49579	21.1903	3.54293	0.5442
					201.716	201.896	6.81718	19.8431	3.11736	0.4908
					201.717	201.897	5.10591	19.5549	2.28164	0.47058
					201.718	201.898	6.53156	16.0711	1.39543	0.38862
					201.719	201.899	6.09702	17.1133	1.72643	0.41952
					201.72	201.9	7.86547	18.6959	1.20829	0.45876
					201.721	201.901	6.65042	16.695	1.25371	0.40656
					201.722	201.902	7.14902	14.8262	1.39943	0.36642
					201.723	201.903	5.69509	17.1452	1.70521	0.41196
					201.724	201.904	6.25304	17.203	1.31364	0.41844
					201.725	201.905	5.50408	15.7387	1.30193	0.3537
					201.726	201.906	3.69296	10.4601	0.842857	0.2448
					201.728	201.908	6.18385	12.2328	1.48129	0.30024
					201.729	201.909	7.7418	17.614	2.29986	0.42288
					201.73	201.91	6.2361	16.074	1.64014	0.35184
					201.731	201.911	5.79198	14.6481	1.09171	0.35022
					201.732	201.912	5.06388	12.4263	0.892143	0.29766
					201.733	201.913	6.11513	19.8813	1.033	0.44184
					201.734	201.914	6.37195	20.8021	1.25643	0.48666
					201.735	201.915	6.42118	19.9577	1.00121	0.44526
					201.736	201.916	6.13032	16.3804	0.6985	0.38256
					201.737	201.917	3.98208	10.7212	0.585929	0.20034
					201.738	201.918	7.48186	20.6436	1.52293	0.51018
					201.739	201.919	5.18088	13.1172	0.675786	0.30252
					201.74	201.92	6.72956	17.8029	1.2555	0.43782
					201.741	201.921	5.47332	17.9098	1.14964	0.42948
					201.742	201.922	5.45845	17.1195	1.14986	0.40956
					201.743	201.923	6.83682	18.6381	1.46486	0.4443
					201.744	201.924	7.81549	18.9734	1.53064	0.46506
					201.745	201.925	7.58134	19.7868	1.87471	0.4605
					201.746	201.926	5.83719	18.9287	1.71693	0.44364
					201.747	201.927	7.96722	23.5013	1.94879	0.5277
					201.748	201.928	7.49488	23.8468	1.13736	0.49434
					201.749	201.929	5.59181	15.8543	0.709	0.29148
					201.75	201.93	9.29314	25.3482	1.40707	0.57348
					201.751	201.931	7.47175	25.6365	1.28321	0.53052
					201.752	201.932	8.72725	24.3442	1.60814	0.51078
					201.753	201.933	7.81999	23.12	2.03929	0.48138
					201.754	201.934	7.18152	21.7449	1.29029	0.47352
					201.755	201.935	7.77547	22.6239	1.41843	0.51444
					201.756	201.936	8.51755	24.7037	2.27564	0.54546
					201.758	201.938	8.48631	24.0021	2.03079	0.51534
					201.759	201.939	10.1465	24.9487	1.55893	0.55626
					201.76	201.94	6.09041	16.9025	0.965357	0.33528
					201.761	201.941	8.57779	22.9407	1.28843	0.48786
					201.762	201.942	9.90868	26.2042	2.29207	0.55434
					201.763	201.943	8.6265	23.4793	2.77443	0.51678
					201.764	201.944	7.60225	20.9292	3.4605	0.47712
					201.765	201.945	9.95993	27.7321	1.28121	0.59868
					201.766	201.946	8.79215	27.3817	1.48214	0.57822
					201.767	201.947	9.10382	25.269	1.98321	0.53874
					201.768	201.948	8.81592	26.2138	1.51379	0.57684
					201.769	201.949	9.15215	26.6833	1.72579	0.58734
					201.77	201.95	8.08422	25.5544	1.67107	0.56982
					201.771	201.951	7.32018	22.0541	5.40621	0.48834
					201.772	201.952	7.13292	24.549	1.11579	0.53994
					201.773	201.953	9.27731	27.6871	1.25286	0.59478
					201.774	201.954	8.44391	26.7042	1.1905	0.57264
					201.775	201.955	8.60358	27.3741	1.28921	0.56052
					201.776	201.956	9.18106	23.9304	1.12357	0.5448
					201.777	201.957	9.09619	26.1034	1.239	0.57516
					201.778	201.958	7.28354	22.6012	3.55279	0.47124
					201.779	201.959	8.09169	17.4833	11.2728	0.38106
					201.78	201.96	8.85314	22.595	7.93007	0.53178
					201.781	201.961	9.99418	30.7776	1.30079	0.69036
					201.782	201.962	9.80587	31.1917	1.18271	0.68364
					201.783	201.963	9.47478	29.936	0.720929	0.6456
					201.784	201.964	9.81212	28.3065	0.850714	0.59034
					201.785	201.965	9.85611	29.3527	1.14171	0.58458
					201.786	201.966	9.13039	29.8396	0.772143	0.6156
					201.788	201.968	10.9916	28.4945	0.526286	0.5682
					201.789	201.969	9.8874	29.4476	0.506071	0.58338
					201.79	201.97	9.63461	29.238	0.856143	0.61416
					201.791	201.971	8.18232	26.1813	1.17479	0.58644
					201.792	201.972	10.1154	25.9653	1.76621	0.57756
					201.793	201.973	6.95081	21.4102	1.43757	0.48324
					201.794	201.974	8.69876	23.3394	1.54707	0.54198
					201.795	201.975	8.379	23.1246	1.54693	0.54114
					201.796	201.976	7.17348	20.9703	1.48129	0.48708
					201.797	201.977	9.25994	22.6384	2.02007	0.53352
					201.798	201.978	10.257	25.0533	2.17371	0.59616
					201.799	201.979	8.19244	24.984	2.56014	0.55878
					201.8	201.98	9.34152	26.7571	2.10779	0.59628
					201.801	201.981	9.51909	26.8661	2.00143	0.60924
					201.802	201.982	8.36502	24.795	2.6175	0.5757
					201.803	201.983	8.76139	25.707	2.21479	0.57666
					201.804	201.984	8.05537	22.7541	2.86557	0.4929
					201.805	201.985	9.20499	25.9165	3.15957	0.56652
					201.806	201.986	8.58971	26.2137	1.95936	0.5733
					201.807	201.987	8.48224	24.1352	2.71707	0.54006
					201.808	201.988	9.4302	26.9926	1.67921	0.58686
					201.809	201.989	8.57308	24.5801	2.82557	0.56244
					201.81	201.99	9.84881	26.5304	2.41093	0.57192
					201.811	201.991	8.33718	25.9613	2.59129	0.57804
					201.812	201.992	9.62407	27.858	1.22721	0.59106
					201.813	201.993	9.85463	28.9842	0.656214	0.61572
					201.814	201.994	9.93441	28.8359	0.640429	0.61194
					201.815	201.995	9.09095	27.6546	1.02171	0.60072
					201.816	201.996	9.70338	26.7975	1.62586	0.6285
					201.817	201.997	7.52194	21.3992	1.35743	0.4299
					201.819	201.999	7.80432	24.7774	2.06321	0.59412
					201.82	202	9.3501	27.0974	1.63414	0.63426
					201.821	202.001	8.26046	26.6302	1.49771	0.61506
					201.822	202.002	10.3485	26.6117	1.73136	0.6189
					201.823	202.003	9.70131	26.4466	2.09157	0.6
					201.824	202.004	7.81878	23.3769	2.45257	0.55926
					201.825	202.005	8.98433	26.3659	2.99157	0.58626
					201.826	202.006	8.82069	25.4857	3.52779	0.58344
					201.827	202.007	9.26291	26.0611	3.13993	0.61386
					201.828	202.008	9.17614	26.3375	3.1145	0.60732
					201.829	202.009	8.74435	25.0677	3.84686	0.57126
					201.83	202.01	7.7157	21.4424	4.10736	0.49818
					201.831	202.011	8.09164	22.3243	4.1195	0.51966
					201.832	202.012	7.97887	22.4617	4.12843	0.5295
					201.833	202.013	7.60039	20.5898	4.44029	0.50118
					201.834	202.014	6.53469	15.7847	5.27307	0.38856
					201.835	202.015	4.60466	13.9963	3.69043	0.32664
					201.836	202.016	7.32372	21.1299	4.50271	0.5211
					201.837	202.017	5.71431	18.8403	5.0835	0.4839
					201.838	202.018	6.10189	19.6795	4.66707	0.46248
					201.839	202.019	4.93359	15.3911	4.55193	0.37914
					201.84	202.02	7.07273	14.2731	4.08314	0.3795
					201.841	202.021	4.89235	11.0797	3.28457	0.30252
					201.842	202.022	5.68048	14.0941	3.78664	0.38568
					201.843	202.023	7.17978	16.7249	5.174	0.44862
					201.844	202.024	6.99623	16.0595	5.40871	0.4017
					201.845	202.025	5.99299	13.3267	3.04114	0.35256
					201.846	202.026	6.35437	13.669	4.24536	0.37536
					201.847	202.027	5.29084	11.2977	4.1705	0.30234
					201.849	202.029	5.55734	13.0359	4.17886	0.35592
					201.85	202.03	6.58594	12.8568	3.33429	0.3513
					201.851	202.031	4.54775	11.0883	2.58814	0.30018
					201.852	202.032	5.47952	11.6543	2.7755	0.32568
					201.853	202.033	4.27616	11.2919	2.1405	0.29076
					201.854	202.034	7.41637	17.7466	3.29393	0.45006
					201.855	202.035	7.23695	16.9046	3.493	0.44832
					201.856	202.036	5.74639	15.8933	3.83529	0.42972
					201.857	202.037	6.48228	15.9831	4.67993	0.43638
					201.858	202.038	7.28238	18.8794	4.86079	0.5055
					201.859	202.039	6.79722	20.0226	4.28021	0.48582
					201.86	202.04	7.09735	18.7901	4.93479	0.48498
					201.861	202.041	5.82326	16.9424	4.677	0.435
					201.862	202.042	6.77128	19.3553	4.96793	0.4941
					201.863	202.043	7.33346	19.3009	5.90521	0.48354
					201.864	202.044	5.33202	18.0763	5.05736	0.45072
					201.865	202.045	7.56545	19.8722	4.94871	0.4803
					201.866	202.046	6.90861	21.0085	4.40314	0.49518
					201.867	202.047	7.66916	17.9853	3.39486	0.37884
					201.868	202.048	7.79659	21.9663	4.52264	0.5235
					201.869	202.049	7.91381	21.2142	3.99443	0.51042
					201.87	202.05	8.41098	24.5944	3.65964	0.55356
					201.871	202.051	8.30758	20.0642	4.63336	0.49506
					201.872	202.052	7.99878	21.4684	4.14143	0.50982
					201.873	202.053	7.56757	21.2088	4.5505	0.49506
					201.874	202.054	8.73651	24.4716	3.92043	0.55662
					201.875	202.055	7.89835	22.1932	3.203	0.50778
					201.876	202.056	8.15363	23.4674	3.0435	0.55122
					201.877	202.057	8.07062	22.3244	3.08764	0.5184
					201.879	202.059	8.54306	23.1457	3.87471	0.52722
					201.88	202.06	6.90967	18.5237	3.26636	0.41724
					201.881	202.061	8.16586	22.7865	3.88143	0.52758
					201.882	202.062	7.44776	22.7748	2.81493	0.52656
					201.883	202.063	8.49484	24.6934	2.90543	0.57504
					201.884	202.064	8.1909	23.9791	2.69836	0.54078
					201.885	202.065	7.74842	21.2195	2.79929	0.49644
					201.886	202.066	8.07877	23.1404	2.60421	0.53292
					201.887	202.067	9.09852	23.8235	2.45	0.55116
					201.888	202.068	7.94329	22.995	2.78871	0.53292
					201.889	202.069	8.32378	22.6571	4.50157	0.5058
					201.89	202.07	7.97072	22.4838	3.60979	0.53718
					201.891	202.071	8.00704	21.2515	4.66979	0.48192
					201.892	202.072	7.12668	19.8452	7.69821	0.4218
					201.893	202.073	9.09964	23.7161	7.67314	0.50196
					201.894	202.074	9.06041	26.6604	3.20993	0.56766
					201.895	202.075	9.05739	23.767	3.88614	0.50724
					201.896	202.076	8.59611	24.3025	5.97936	0.50316
					201.897	202.077	7.34289	24.5081	4.62179	0.57252
					201.898	202.078	8.64238	25.685	4.19014	0.60222
					201.899	202.079	8.60109	26.1456	4.5195	0.62472
					201.9	202.08	9.2016	27.2214	2.62407	0.63258
					201.901	202.081	9.96522	28.5103	2.60343	0.67248
					201.902	202.082	9.13495	26.5658	3.81257	0.62928
					201.903	202.083	8.92763	26.0813	3.83457	0.59364
					201.904	202.084	10.4072	28.9635	2.78807	0.66492
					201.905	202.085	9.29425	26.8435	2.35214	0.62376
					201.906	202.086	9.56419	28.782	2.15914	0.68196
					201.907	202.087	8.63566	25.2451	2.17521	0.603
					201.909	202.089	9.24173	26.1219	0.964	0.62508
					201.91	202.09	9.50162	28.6605	0.549643	0.60156
					201.911	202.091	9.86474	28.9494	0.478643	0.60888
					201.912	202.092	9.48092	24.9891	0.964643	0.54648
					201.913	202.093	9.19292	26.6625	1.06679	0.58014
					201.914	202.094	8.27656	24.1846	1.71729	0.5601
					201.915	202.095	7.66255	21.3745	3.3215	0.52122
					201.916	202.096	7.61813	19.825	4.03921	0.48558
					201.917	202.097	7.2378	18.3893	4.3595	0.45564
					201.918	202.098	7.98634	20.4874	3.71621	0.51348
					201.919	202.099	7.58785	20.2557	3.25207	0.50028
					201.92	202.1	7.99766	20.4052	3.83107	0.50652
					201.921	202.101	9.08921	22.315	3.76536	0.55212
					201.922	202.102	6.09713	16.037	3.22607	0.42684
					201.923	202.103	6.86822	16.6555	4.57964	0.46494
					201.924	202.104	5.41376	16.7787	4.64343	0.41088
					201.925	202.105	7.94086	18.5969	4.25871	0.46236
					201.926	202.106	7.58059	21.0154	3.29121	0.53466
					201.927	202.107	7.03493	19.1671	2.91357	0.49038
					201.928	202.108	7.11921	20.0696	3.11464	0.48708
					201.929	202.109	8.18841	21.1876	3.27171	0.51306
					201.93	202.11	8.10339	22.4135	2.83521	0.52152
					201.931	202.111	7.30594	19.9371	3.45693	0.49392
					201.932	202.112	6.11439	16.9327	4.07521	0.44418
					201.933	202.113	6.48704	16.8954	4.56293	0.4173
					201.934	202.114	6.42653	19.52	4.40436	0.46122
					201.935	202.115	7.68791	21.2189	3.21557	0.546
					201.936	202.116	7.43988	18.1606	3.8935	0.47916
					201.937	202.117	6.54914	19.255	3.48864	0.49422
					201.938	202.118	7.2468	19.9353	3.82857	0.51486
					201.94	202.12	7.11635	16.2576	4.74686	0.43512
					201.941	202.121	5.83984	17.7479	4.24486	0.4581
					201.942	202.122	6.93683	20.9799	3.56721	0.5256
					201.943	202.123	8.16522	22.967	2.87743	0.54366
					201.944	202.124	6.70463	19.158	4.03121	0.4626
					201.945	202.125	8.76727	20.2248	4.41707	0.52602
					201.946	202.126	7.73524	19.9925	3.63321	0.49734
					201.947	202.127	5.90824	17.8769	3.48229	0.43878
					201.948	202.128	7.81904	22.3516	3.70336	0.53418
					201.949	202.129	6.99549	20.2174	3.61057	0.48876
					201.95	202.13	7.52972	20.3027	3.76957	0.50244
					201.951	202.131	7.61855	22.3429	3.54743	0.53988
					201.952	202.132	8.08348	21.3155	4.28764	0.52938
					201.953	202.133	7.00031	21.1912	3.664	0.52122
					201.954	202.134	6.71707	20.8013	3.76543	0.52314
					201.955	202.135	7.46036	20.7176	4.08843	0.4986
					201.956	202.136	7.64677	19.555	4.20293	0.50184
					201.957	202.137	5.94514	16.057	5.18843	0.43794
					201.958	202.138	5.18707	15.8465	4.68193	0.41706
					201.959	202.139	8.78066	21.5242	4.28993	0.53724
					201.96	202.14	7.96595	22.0274	3.71557	0.52596
					201.961	202.141	8.24834	22.9192	3.61729	0.52542
					201.962	202.142	8.95638	22.4609	3.95393	0.53682
					201.963	202.143	8.12134	23.2811	3.38207	0.52638
					201.964	202.144	4.5873	14.8341	3.82836	0.42894
					201.965	202.145	5.19607	13.9999	4.32593	0.39882
					201.966	202.146	6.77208	16.6843	4.90943	0.45756
					201.967	202.147	7.51839	19.6775	4.69471	0.48498
					201.968	202.148	7.8957	18.4183	3.93393	0.46926
					201.97	202.15	6.32801	18.6072	3.015	0.42942
					201.971	202.151	7.12504	18.4194	4.76843	0.45378
					201.972	202.152	6.63951	18.0642	4.47429	0.46536
					201.973	202.153	6.54925	18.5909	4.68507	0.4596
					201.974	202.154	7.20143	17.4295	4.96293	0.44868
					201.975	202.155	7.25739	16.3201	4.9925	0.42894
					201.976	202.156	6.4476	14.9397	5.08457	0.40284
					201.977	202.157	6.34235	16.0742	4.48629	0.4254
					201.978	202.158	5.76593	15.4024	4.47393	0.40074
					201.979	202.159	5.28416	15.8548	4.80907	0.40548
					201.98	202.16	5.96123	14.5799	4.02229	0.33006
					201.981	202.161	6.11174	16.4179	5.12743	0.45288
					201.982	202.162	8.30811	17.4152	5.48193	0.45084
					201.983	202.163	4.66004	13.2416	4.47521	0.34236
					201.984	202.164	8.65456	19.6954	4.831	0.52206
					201.985	202.165	6.95022	17.5383	4.56014	0.47088
					201.986	202.166	7.16871	17.6937	4.51686	0.46452
					201.987	202.167	6.15542	15.6198	4.36636	0.42342
					201.988	202.168	7.26861	17.4076	4.68357	0.45744
					201.989	202.169	6.8823	17.7761	5.51129	0.4596
					201.99	202.17	6.02974	17.0188	5.5755	0.45504
					201.991	202.171	7.70421	19.7232	6.18614	0.5013
					201.992	202.172	7.7895	22.5402	4.59129	0.53652
					201.993	202.173	8.07697	21.4942	5.39957	0.47706
					201.994	202.174	8.85325	24.0739	4.72771	0.5418
					201.995	202.175	7.58944	21.0669	5.64036	0.49896
					201.996	202.176	7.76499	22.0769	5.72779	0.5286
					201.997	202.177	6.65497	19.3743	6.55143	0.45798
					201.998	202.178	6.14584	19.7961	5.15579	0.47958
					202	202.18	6.90311	17.795	6.14564	0.4671
					202.001	202.181	6.99226	19.4645	6.99036	0.47466
					202.002	202.182	7.19979	18.8925	6.90079	0.4569
					202.003	202.183	8.42252	22.4857	5.28993	0.51954
					202.004	202.184	7.08178	20.5959	4.68007	0.46356
					202.005	202.185	8.81862	23.9773	3.82971	0.53478
					202.006	202.186	8.36952	21.3546	3.59379	0.50754
					202.007	202.187	7.61839	20.9425	3.2175	0.4869
					202.008	202.188	7.52834	22.0281	3.58186	0.49758
					202.009	202.189	7.62173	21.172	3.33543	0.47682
					202.01	202.19	7.34109	21.4467	2.75579	0.48012
					202.011	202.191	6.29936	19.7136	3.54993	0.40692
					202.012	202.192	7.26226	19.7224	2.90929	0.40818
					202.013	202.193	5.57164	17.6651	3.16029	0.3702
					202.014	202.194	7.89406	19.8779	4.41736	0.48882
					202.015	202.195	8.49399	20.7638	4.35671	0.52062
					202.016	202.196	7.33267	21.3064	3.9615	0.47556
					202.017	202.197	6.28878	17.9753	3.69829	0.42372
					202.018	202.198	8.92345	22.2928	3.77379	0.53754
					202.019	202.199	7.99264	21.3846	3.54157	0.50004
					202.02	202.2	7.37412	20.9159	4.08793	0.48462
					202.021	202.201	8.31304	20.1048	3.58029	0.48072
					202.022	202.202	7.64555	23.39	3.31357	0.54942
					202.023	202.203	8.30149	23.053	3.748	0.54558
					202.024	202.204	8.865	22.4981	3.33157	0.5466
					202.025	202.205	7.63973	23.4108	2.8235	0.50682
					202.026	202.206	9.05956	21.7537	5.20557	0.51684
					202.027	202.207	8.10519	20.17	3.40021	0.48588
					202.028	202.208	5.77366	17.7046	2.79779	0.43068
					202.03	202.21	7.812	23.0658	3.40036	0.52674
					202.031	202.211	8.90412	23.8644	3.40779	0.52572
					202.032	202.212	7.63894	21.889	3.22436	0.49332
					202.033	202.213	7.39535	20.9388	3.74393	0.48174
					202.034	202.214	6.71982	19.3707	3.5315	0.44934
					202.035	202.215	7.35581	20.046	4.41064	0.48444
					202.036	202.216	6.49324	16.765	6.45371	0.36426
					202.037	202.217	6.21101	15.3721	5.30171	0.34356
					202.038	202.218	8.13198	19.8351	3.72521	0.48216
					202.039	202.219	7.14812	20.4969	3.207	0.48912
					202.04	202.22	8.10122	23.1594	3.47743	0.55038
					202.041	202.221	6.0318	20.1988	2.88879	0.49386
					202.042	202.222	6.41822	19.6115	4.19629	0.47268
					202.043	202.223	6.06611	18.8205	3.76929	0.46392
					202.044	202.224	7.06908	18.9563	4.07121	0.47976
					202.045	202.225	8.45926	24.2245	3.75164	0.53082
					202.046	202.226	8.96368	23.4716	4.26479	0.53958
					202.047	202.227	8.09809	20.522	6.19821	0.51918
					202.048	202.228	8.5041	22.612	4.79979	0.51234
					202.049	202.229	7.53242	22.3574	4.091	0.5097
					202.05	202.23	8.77812	22.869	3.51443	0.51756
					202.051	202.231	6.70399	21.5579	2.94214	0.49632
					202.052	202.232	6.52415	19.958	3.18014	0.49494
					202.053	202.233	6.85196	19.4204	3.25707	0.48126
					202.054	202.234	6.92709	21.0905	3.21793	0.51372
					202.055	202.235	8.06426	21.7947	3.09043	0.52362
					202.056	202.236	8.91048	20.8533	3.69507	0.51114
					202.057	202.237	7.5096	20.0812	3.48036	0.46836
					202.058	202.238	7.85096	21.8162	3.65307	0.5067
					202.06	202.24	7.41028	20.6249	4.15871	0.47406
					202.061	202.241	7.25225	21.0412	3.21307	0.48954
					202.062	202.242	5.43822	19.2747	3.38143	0.47256
					202.063	202.243	6.78664	18.759	4.18929	0.48102
					202.064	202.244	7.18618	20.2203	4.44986	0.50178
					202.065	202.245	6.09708	18.7602	4.36414	0.47034
					202.066	202.246	6.3405	17.7568	4.15407	0.4476
					202.067	202.247	7.59965	19.4153	4.07871	0.4629
					202.068	202.248	7.43548	18.6055	3.07371	0.42816
					202.069	202.249	7.84069	21.6826	3.22171	0.46758
					202.07	202.25	7.23626	21.7644	3.29857	0.51648
					202.071	202.251	7.77669	20.2248	4.18671	0.50898
					202.072	202.252	6.18041	17.2267	5.39021	0.43728
					202.073	202.253	5.68043	16.0105	5.14014	0.42672
					202.074	202.254	5.93513	17.663	5.72407	0.43266
					202.075	202.255	7.05356	18.6483	6.93179	0.44874
					202.076	202.256	6.09596	19.4465	3.50057	0.5064
					202.077	202.257	7.06897	21.1844	2.47807	0.5211
					202.078	202.258	7.62951	22.673	2.778	0.53838
					202.079	202.259	6.00289	18.0541	3.6545	0.4776
					202.08	202.26	6.26395	19.586	2.97529	0.48732
					202.081	202.261	5.80654	19.2071	2.12857	0.47274
					202.082	202.262	7.76726	21.8706	1.98879	0.51324
					202.083	202.263	7.1685	20.8	1.85557	0.4986
					202.084	202.264	5.27368	13.1536	4.89814	0.30276
					202.085	202.265	7.32536	20.4948	2.46164	0.49608
					202.086	202.266	7.16654	20.042	2.78421	0.48354
					202.087	202.267	7.236	18.813	3.00893	0.47148
					202.088	202.268	5.70923	13.5501	6.40043	0.38694
					202.089	202.269	5.69933	16.1202	4.11464	0.41256
					202.091	202.271	6.29407	15.3299	3.19957	0.39162
					202.092	202.272	3.87646	14.0224	3.094	0.3687
					202.093	202.273	6.75265	18.5795	3.30657	0.45552
					202.094	202.274	6.00803	19.6777	2.0435	0.46656
					202.095	202.275	7.218	18.9672	2.34114	0.46716
					202.096	202.276	6.50626	16.2637	2.38914	0.39096
					202.097	202.277	8.27529	21.4741	1.60336	0.5205
					202.098	202.278	8.57864	23.3911	1.54779	0.53136
					202.099	202.279	8.00439	17.3729	2.55086	0.42594
					202.1	202.28	6.12037	18.7932	3.10293	0.4758
					202.101	202.281	5.12873	15.8684	2.10757	0.38328
					202.102	202.282	4.67201	15.6965	2.027	0.36522
					202.103	202.283	5.86779	15.1001	2.48843	0.36006
					202.104	202.284	6.01555	17.7148	2.72836	0.44496
					202.105	202.285	5.74507	17.8843	2.69521	0.46662
					202.106	202.286	4.42038	14.1679	2.70936	0.3675
					202.107	202.287	4.43499	15.9524	3.10407	0.41082
					202.108	202.288	7.51998	17.9698	3.22321	0.49422
					202.109	202.289	6.61511	17.0615	2.84071	0.45564
					202.11	202.29	8.44894	17.5763	3.40421	0.49746
					202.111	202.291	4.50921	13.5887	2.622	0.35292
					202.112	202.292	5.09474	13.5936	2.08207	0.31764
					202.113	202.293	6.27512	15.1839	2.91486	0.40266
					202.114	202.294	5.00146	13.7234	2.524	0.35298
					202.115	202.295	4.14566	10.8152	2.35871	0.22902
					202.116	202.296	5.42811	11.5618	4.2635	0.29892
					202.117	202.297	5.32858	14.0508	3.78621	0.387
					202.118	202.298	4.97308	14.6106	3.0405	0.38136
					202.119	202.299	4.94841	13.3225	2.881	0.3402
					202.121	202.301	5.76461	12.4331	3.455	0.34188
					202.122	202.302	5.54654	12.7395	4.82357	0.3573
					202.123	202.303	4.79573	9.40361	4.35871	0.2811
					202.124	202.304	4.51112	8.561	3.80379	0.24624
					202.125	202.305	5.49937	10.6383	3.00564	0.28398
					202.126	202.306	5.56142	11.8568	4.12386	0.27732
					202.127	202.307	5.88716	15.0272	4.45879	0.39822
					202.128	202.308	5.22222	14.7125	3.6685	0.35382
					202.129	202.309	5.64702	17.4305	3.32764	0.43968
					202.13	202.31	5.7771	17.2921	2.49093	0.41016
					202.131	202.311	5.95181	15.4414	2.60693	0.36192
					202.132	202.312	5.65343	11.856	5.50257	0.28308
					202.133	202.313	6.80167	11.4185	8.0285	0.28572
					202.134	202.314	6.33224	18.7568	4.54286	0.49518
					202.135	202.315	5.39148	16.6661	4.47164	0.4212
					202.136	202.316	5.36659	15.207	3.24721	0.3819
					202.137	202.317	6.04297	18.0354	3.43093	0.4431
					202.138	202.318	6.13795	15.2888	3.27914	0.40512
					202.139	202.319	6.30275	15.8211	4.34129	0.42492
					202.14	202.32	6.72088	15.362	4.35993	0.4398
					202.141	202.321	4.88059	12.7651	2.50436	0.3231
					202.142	202.322	3.37283	9.91531	1.68807	0.25362
					202.143	202.323	5.61944	13.6813	3.12014	0.37164
					202.144	202.324	5.72792	15.3662	4.39014	0.46218
					202.145	202.325	5.58185	15.0451	4.92821	0.4176
					202.146	202.326	6.76403	17.3125	4.29193	0.43458
					202.147	202.327	6.78679	18.2248	3.07657	0.47742
					202.148	202.328	7.29476	16.8759	3.30229	0.42438
					202.149	202.329	5.46866	15.7871	3.54629	0.42546
					202.151	202.331	7.84445	19.1191	4.01514	0.50436
					202.152	202.332	6.49689	19.1111	3.63386	0.48222
					202.153	202.333	7.07633	18.8962	3.443	0.47214
					202.154	202.334	8.77934	22.5264	2.21157	0.5301
					202.155	202.335	7.55285	20.8803	2.406	0.4803
[truncated: 34,465 more rows]

## Sheet: Zhao et al (2022) used data
Zhao et al (2022) bulk data												Zhao et al (2022) merged data
Original core depth (m)	GR corrected depth (m)	Al (%)	Si (%)	Ca (%)	Ti (%)							Adjusted depth (m)	Radioisotopically anchored astrolomical time (Ma)	Al (%)	Si (%)	Ti (%)	Ca (%)
200	200.18	9.08402	25.9676	3.47586	0.58932	62.111 m (adjusted) = 499.9115 +/- 0.9 Ma						62.111	497.083	9.08402	25.9676	0.58932	3.47586
200.001	200.181	9.20758	25.2069	3.19586	0.5244							62.112	497.084	9.1458	25.5872	0.55686	3.33586
200.002	200.182	7.75228	24.7339	3.72964	0.53724							62.113	497.084	9.20758	25.2069	0.5244	3.19586
200.003	200.183	8.77431	24.4577	5.77071	0.52758							62.114	497.084	7.75228	24.7339	0.53724	3.72964
200.005	200.185	9.16846	24.8193	5.30157	0.50436							62.115	497.084	8.77431	24.4577	0.52758	5.77071
200.006	200.186	9.32008	24.5875	6.06457	0.54042							62.116	497.084	9.16846	24.8193	0.50436	5.30157
200.007	200.187	7.68039	21.9865	5.40743	0.47268							62.117	497.084	9.32008	24.5875	0.54042	6.06457
200.008	200.188	6.77006	21.0671	3.78014	0.45222							62.118	497.085	8.50024	23.287	0.50655	5.736
200.009	200.189	8.76526	25.3097	3.09721	0.54696							62.119	497.085	7.68039	21.9865	0.47268	5.40743
200.011	200.191	8.17984	22.4943	3.84729	0.52638							62.12	497.085	6.77006	21.0671	0.45222	3.78014
200.012	200.192	7.48144	22.1161	5.17964	0.48852							62.121	497.085	8.76526	25.3097	0.54696	3.09721
200.013	200.193	7.74016	21.9651	5.77593	0.48336							62.122	497.085	8.17984	22.4943	0.52638	3.84729
200.014	200.194	7.8372	22.0974	4.87179	0.47106							62.123	497.085	7.83064	22.3052	0.50745	4.51346
200.016	200.196	7.15103	22.3895	3.26014	0.48702							62.124	497.086	7.48144	22.1161	0.48852	5.17964
200.017	200.197	9.02975	24.4183	5.25414	0.531							62.125	497.086	7.74016	21.9651	0.48336	5.77593
200.018	200.198	7.43734	22.0979	3.38057	0.5163							62.126	497.086	7.8372	22.0974	0.47106	4.87179
200.019	200.199	8.44428	24.1422	3.54593	0.55374							62.127	497.086	7.15103	22.3895	0.48702	3.26014
200.02	200.2	7.00195	24.8112	2.57793	0.55758							62.128	497.086	9.02975	24.4183	0.531	5.25414
200.022	200.202	7.9947	24.0146	3.66057	0.53124							62.129	497.086	8.23354	23.2581	0.52365	4.31736
200.023	200.203	6.96997	24.0658	3.60814	0.53142							62.13	497.087	7.43734	22.0979	0.5163	3.38057
200.024	200.204	6.64925	18.671	3.44207	0.46434							62.131	497.087	8.44428	24.1422	0.55374	3.54593
200.025	200.205	7.15696	19.2691	2.81157	0.4677							62.132	497.087	7.00195	24.8112	0.55758	2.57793
200.027	200.207	6.92603	18.2802	3.51714	0.46392							62.133	497.087	7.9947	24.0146	0.53124	3.66057
200.028	200.208	6.20624	19.5426	3.00214	0.45306							62.134	497.087	7.48234	24.0402	0.53133	3.63436
200.029	200.209	8.22378	20.5756	3.42743	0.4881							62.135	497.087	6.96997	24.0658	0.53142	3.60814
200.03	200.21	6.92222	21.6242	3.04257	0.4908							62.136	497.088	6.64925	18.671	0.46434	3.44207
200.031	200.211	8.31854	23.7378	2.65279	0.53436							62.137	497.088	7.15696	19.2691	0.4677	2.81157
200.033	200.213	7.65921	20.7902	2.63464	0.50472							62.138	497.088	6.92603	18.2802	0.46392	3.51714
200.034	200.214	8.01154	19.8111	4.09257	0.4707							62.139	497.088	6.20624	19.5426	0.45306	3.00214
200.035	200.215	6.58191	18.2581	2.11079	0.44022							62.14	497.088	7.21501	20.0591	0.47058	3.21479
200.036	200.216	6.28316	18.7624	2.90907	0.45018							62.141	497.088	8.22378	20.5756	0.4881	3.42743
200.038	200.218	5.97102	17.3476	2.10257	0.40434							62.142	497.089	6.92222	21.6242	0.4908	3.04257
200.039	200.219	6.6042	17.2485	2.51321	0.43218							62.143	497.089	8.31854	23.7378	0.53436	2.65279
200.04	200.22	5.6799	17.253	2.20836	0.40062							62.144	497.089	7.65921	20.7902	0.50472	2.63464
200.041	200.221	6.84715	18.1634	2.67564	0.46002							62.145	497.089	7.83537	20.3006	0.48771	3.36361
200.042	200.222	6.36194	18.2247	2.04	0.42684							62.146	497.089	8.01154	19.8111	0.4707	4.09257
200.044	200.224	6.09506	17.6265	1.54729	0.38616							62.147	497.089	6.58191	18.2581	0.44022	2.11079
200.045	200.225	6.23721	18.1762	2.48164	0.4146							62.148	497.09	6.28316	18.7624	0.45018	2.90907
200.046	200.226	4.84264	18.001	2.10164	0.40722							62.149	497.09	5.97102	17.3476	0.40434	2.10257
200.047	200.227	5.31688	15.854	2.5405	0.34128							62.15	497.09	6.6042	17.2485	0.43218	2.51321
200.049	200.229	5.37199	16.3793	1.58486	0.36108							62.151	497.09	6.14205	17.2508	0.4164	2.36079
200.05	200.23	4.3056	17.3657	1.62871	0.3606							62.152	497.09	5.6799	17.253	0.40062	2.20836
200.051	200.231	6.80331	18.2288	1.58571	0.38916							62.153	497.09	6.84715	18.1634	0.46002	2.67564
200.052	200.232	5.10866	16.3397	1.4155	0.37254							62.154	497.091	6.36194	18.2247	0.42684	2.04
200.053	200.233	6.47725	20.0376	0.799929	0.40794							62.155	497.091	6.09506	17.6265	0.38616	1.54729
200.055	200.235	5.13418	18.9091	0.562857	0.37434							62.156	497.091	6.16614	17.9014	0.40038	2.01446
200.056	200.236	7.27714	21.1315	1.5785	0.44526							62.157	497.091	6.23721	18.1762	0.4146	2.48164
200.057	200.237	6.34939	18.9648	1.75071	0.40962							62.158	497.091	4.84264	18.001	0.40722	2.10164
200.058	200.238	7.73116	20.5438	1.52671	0.42084							62.159	497.091	5.31688	15.854	0.34128	2.5405
200.06	200.24	4.02316	15.4992	1.52007	0.33642							62.16	497.092	5.37199	16.3793	0.36108	1.58486
200.061	200.241	7.04303	17.7045	1.24143	0.38922							62.161	497.092	4.3056	17.3657	0.3606	1.62871
200.062	200.242	6.26808	16.1584	1.65971	0.3525							62.162	497.092	5.55446	17.7973	0.37488	1.60721
200.063	200.243	5.05525	15.5319	2.64521	0.35382							62.163	497.092	6.80331	18.2288	0.38916	1.58571
200.065	200.245	5.47031	15.855	1.95671	0.36528							62.164	497.092	5.10866	16.3397	0.37254	1.4155
200.066	200.246	6.38767	17.4456	2.5195	0.36876							62.165	497.092	6.47725	20.0376	0.40794	0.799929
200.067	200.247	5.10035	16.4599	1.47971	0.3585							62.166	497.093	5.13418	18.9091	0.37434	0.562857
200.068	200.248	6.45051	15.3301	1.50657	0.32022							62.167	497.093	6.20566	20.0203	0.4098	1.07068
200.069	200.249	4.29496	14.6351	2.42843	0.31998							62.168	497.093	7.27714	21.1315	0.44526	1.5785
200.071	200.251	8.94584	26.898	3.36807	0.62232							62.169	497.093	6.34939	18.9648	0.40962	1.75071
200.072	200.252	8.99179	24.9708	4.66693	0.60132							62.17	497.093	7.73116	20.5438	0.42084	1.52671
200.073	200.253	8.68823	24.2099	4.60586	0.5643							62.171	497.093	4.02316	15.4992	0.33642	1.52007
200.074	200.254	7.23934	25.6865	3.28421	0.5418							62.172	497.094	7.04303	17.7045	0.38922	1.24143
200.076	200.256	7.72205	26.1933	3.332	0.58818							62.173	497.094	6.65555	16.9314	0.37086	1.45057
200.077	200.257	7.94006	24.4571	3.51136	0.53358							62.174	497.094	6.26808	16.1584	0.3525	1.65971
200.078	200.258	6.73274	24.2977	2.91714	0.5331							62.175	497.094	5.05525	15.5319	0.35382	2.64521
200.079	200.259	7.54735	23.1669	4.00264	0.52464							62.176	497.094	5.47031	15.855	0.36528	1.95671
200.08	200.26	8.29414	23.7934	4.02779	0.49068							62.177	497.094	6.38767	17.4456	0.36876	2.5195
200.082	200.262	8.02016	24.5213	3.68993	0.53328							62.178	497.095	5.74401	16.9528	0.36363	1.99961
200.083	200.263	8.08994	24.786	3.61129	0.51912							62.179	497.095	5.10035	16.4599	0.3585	1.47971
200.084	200.264	7.64232	22.7605	3.65221	0.49692							62.18	497.095	6.45051	15.3301	0.32022	1.50657
200.085	200.265	8.45423	22.5914	4.53907	0.50766							62.181	497.095	4.29496	14.6351	0.31998	2.42843
200.087	200.267	6.69023	20.8817	4.25593	0.4974							62.182	497.095	8.94584	26.898	0.62232	3.36807
200.088	200.268	8.53989	25.0227	2.51771	0.519							62.183	497.095	8.96882	25.9344	0.61182	4.0175
200.089	200.269	9.51983	25.5789	3.24029	0.552							62.184	497.096	8.99179	24.9708	0.60132	4.66693
200.09	200.27	8.47218	27.3847	2.49964	0.57192							62.185	497.096	8.68823	24.2099	0.5643	4.60586
200.091	200.271	8.01058	25.5791	3.13143	0.47004							62.186	497.096	7.23934	25.6865	0.5418	3.28421
200.093	200.273	7.88628	27.7827	2.89143	0.51852							62.187	497.096	7.72205	26.1933	0.58818	3.332
[truncated: 11,534 more rows]
[truncated: 6 more columns]

## Sheet: This study (100% Anthraconite)
Depth (m)	Depth adapted on GR	filename	Al %	Si %	K %	Ca %	Ti %	V ppm	Cr ppm	Mn ppm	Fe %	Ni ppm	Cu ppm	Zn ppm	Ga ppm	As ppm	Rb ppm	Sr ppm	Y ppm	Zr ppm	Ba ppm	Pb ppm	U ppm
[truncated: 27,223 more rows]

[truncated: 9 more sheets: This study (20% Anthraconite), Correlation based on GR-Res, ICP-MS data, Z-score Ti, Z-score Al, Z-score Si, Z-score Ca, Z-score K, Z-score Zr]
