# Supplementary material for: Astronomical calibration of the middle Cambrian in Baltica: Global carbon cycle synchronization and climate dynamics
Source: Research Square preprint supplement (doi:10.21203/rs.3.rs-7509865/v1), 2025-09-11
Supplement: Supplementary file 4 [file c9b00d1ffb3110c6c077256a.xlsx]

## Sheet: Paleomap and localities ID
										Last update : 29th May 2025
Locality ID	Paleocontinent	Country/State	Locality/area/section	Wuliuan	Drumian	DICE	Reference(s)		1	Carbon isotope excursion / Stage identified
1	Gondwana	Australia	Arafura Basin	1	1	0	Zhen et al 2012		0	Carbon isotope excursion / Stage not identified
2			Daly Basin	1	1	?	Lindsay et al 2005		?	Carbon isotope excursion / Stage uncertain
3			Georgina Basin	1	1	1	Donelly et al 1988 / Lindsay et al 2005 / Laurie 2012 / Pages & Schmid 2016
4			Amadeus Basin	1	1	1	Schmid 2017 / Lindsay et al 2005
5			Warburton Basin	1	1	0	Australia Government
6			Officer Basin	?	1	0
7			Arrowie Basin	1	?	0	Jago et al 2006, 2012
8			Gnatla Shelf	1	0	0	Jago & Kruse 2020
9			Stansbury Basin	1	1	0	Hall 2012 / Jago & Kruse 2020
10		Antarctica	Heritage Range	?	?	0	Curtis et al 1999/Randall & Mac Nicoaill 2004
11		Argentina	Patagonia	1	1	0	Gonzales et al 2018
12			Precordillera terrane	1	1	?	Foglia & Vaccari 2010/ Gomez & Astini 2007, 2015
13		India-Bhutan	Tehtyan Himalaya	1	1	0	Singh et al 2017a, 2017b, 2020
14		Oman	Oman	1	1	0	Al-Husseini 2010
15		Iran	Zagros mountains	1	1	0	Ghavidel-syooki & Vecoli 2008
16			Albroz mountains	1	1	?	Kruse & Zhuravelev 2008 / Al-Husseini 2010 / Alvaro et al 2022
17		Egypt	Sinaï area	1	1	0	El-Arabya 1999 / Weissbrod 2003 / Khalifa et al 2006,2023
18		Jordan	Dead Sea area	1	1	0	Weissbrod 2003/ Khalifa et al 2006, 2023 / Al-Husseini 2010 / Ghienne et al 2010 / Eilicki & Geyer 2013
19		Saudi Arabia	Saudi Arabia	1	1	0	Khalifa et al 2006, 2023 / Al-Husseini 2010
20		Libya	Libya	1	1	0	Khalifa et al 2023
21		Turkey	Arabian Plate	1	1	0	Ghienne et al 2010
22			Taurus Chain	1	1	0
23		Czechia	Barrandian area	1	1	0	Kovar et al 2022
24		Germany	Franconian Forest	1	1	0	Landing et al 2014
25		Italy	Sardinia	1	1	0	Alvaro et al 2018, 2020
26		France	Montagne Noire	1	1	1	Alvaro et al 1998 / Alvaro et al 2008 / Wotte et al 2012 / Jamart et al 2025
27			Armorica	1	1	0	Alvaro et al 2018, 2020
28		Spain	Eastern Pyrenees	1	1	0
29			Cantabrian zone	1	1	0	Wotte et al 2012 / Alvaro et al 2018, 2020
30			Ossa-Morena zone	1	1	0	Alvaro et al 2018, 2020
31		Algeria	Algeria	1	1	0	Ghienne et al 2007
32		Morocco	Anti-Atlas	1	1	0	Alvaro & Clausen 2007 / Landing et al 2020
33	Avalonia	Belgium	Braban massif	1	1	0	Landing et al 2022
34		Canada	E Newfoundland	1	1	0
35			Nova Scotia	1	1	0
36		Massachussets	Boston area	1	1	0
37		UK	Wales	1	1	0
38			S England	1	1	0
39	Baltica	Norway	Norway	1	1	0	Nielsen & Schovsbo 2015
40		Denmark	Denmark	1	1	0
41		Sweden	Sweden	1	1	1	Alvaro et al 2010 / Nielsen & Schovsbo 2015 / Lenhert et al 2013 / Lundberg 2016 / this study
42		Latvia	Latvia	0	?	0	Nielsen & Schovsbo 2015
43		Lithuania	Lithuania	?	1	0
44		Estonia	Estonia	0	?	0
45		Poland	NE Poland	1	?	0	Nielsen & Schovsbo 2015
46			SE Poland	?	?	0	Stadnik et al 2019 / Wendorff et al 2019
47	South China	China	Well K2	1	?	0	Chang et al 2017
48			Well WN2	1	?	0
49			Duibian	1	1	?	Zuo et al 2018
50			Dongjing	1	0	0	Liu et al 2021
51			Wangcun	1	1	1	Zhu et al 2004 / Li et al 2020 / Dong et al 2025
52			Jianshan	1	?	0	Guo et al 2010
53			Wuliu - Zengjiayan	1	?	0
54			Yankong	1	1	?	Zuo et al 2008, 2018 / Li et al 2025
55			Balang	1	1	?	Li et al 2025
56			Wuhe	1	1	?
57			Bandenggou	?	?	0	Ren et al 2017
58			Well HS2	1	?	0	Zhang et al 2022
59			Houtan	1	1	1	Zheng et al 2025
60	Annamia	Indochina	Indochina	1	1	0	Tran et al 2020
61		N Viet Nam	N Viet Nam	1	1	0
62	North China	Korean Penninsula	Korean Penninsula	1	1	0	Lee et al 2016 / Choi et al 2016 / Choi & Park 017 / Oh et al 2023 / Kwang-Sik So et al 2024
63			Pyongnam basin	1	1	?	Myong-Chol et al 2018
64			Deoksang section	1	1	1	Choi et al 2016 / LeRoy et al 2021
65		China	Wuhai area	1	0	0	Zhang et al 2015
66			Qinglongshan	1	1	1	Gu et al 2025
67			Weihui area	1	0	0	He et al 2022
68			Jiagou-Bagongshan	1	1	1	Zhu et al 2004
69			Xiweikou section	1	1	?	Wang & Gong 2023
70			Shatan	1	1	1	Zuo et al 2023
71	Tarim	China	M1-M3	1	1	?	Liu et al 2023
72			Tadong 2 (Well TD2)	1	1	?	Liu et al 2023 / Yang et al 2021
73			Zhongshen 1	1	1	1	Yang et al 2021
74			Penglaiba	1	?	?	Guo et al 2017 / Wang et al 2011 / Yang et al 2021
75			Xiaoerbulake	1	1	1	Wu et al 2021 / Yang et al 2021
76			Shutan 1	1	1	1	Yang et al 2021
77	Siberia	N Kazhakstan	Kokchetav massif	1	1	0	Degtyarev et al 2016
78		N Mongolia	Khubsugul	1	1	0	Dorjnamjaa et al 2016 / Sun et al 2023
79		Russsia	Aldan River	1	1	?	Brasier & Sukhov 1998
80			Lena River	1	1	0	Brasier & Sukhov 1998 / Kouchinsky et al 2022
81			Olenek River	1	1	?	Brasier & Sukhov 1998
82			Muna River	1	1	?
83			Malaya Kuonamka River	1	1	?	Brasier & Sukhov 1998 / Kouchinsky et al 2022
84			Molodo River	1	1	?	Wotte et al 2011 / Shabanov et al 2008
85			Chopko River	?	1	0	Makarova et al 2025
86	Laurentia	Canada	W Newfoundland	1	1	1	Shembilu & Azmy 2021
87		UK	N Scotland	1	1	1	Faggetter et al 2016
88		N Greenland	N Greenland	?	?	0	Inesson & Peel 1997
89		Alaska	Baird Mtns	1	1	0	Strauss et al 2013
90			Hillard Peak	1	1	0	Brabb 1967
91			Doonerak window	1	1	0	Strauss et al 2013
92			Shublik & Sadler Mtns	1	1	0
93			British Mtns	1	1	0
94			Mt Snowden	1	1	0
95			Limestone Hogback	1	1	0	Brabb 1967
96			Yukon River	1	1	0
97			Adams Peak	1	1	0
98			Ridge & Flatiron	1	1	0
99			Tatonduk River	1	1	0
100			Jones Ridge	1	1	0
101		Canada	Hornaday River	1	1	1	Bouchard 2019
102			Misty Creek Embayment	1	1	1	Bouchard 2019 / Turner 2015 / Scott et al 2022
103			McKenzie Mtns	1	0	0	Handmaker et al 2022
104			Southern Canadian Rockies	1	1	0	Montanez et al 2000 / Collom et al 2009 / Deiss 1939 / McCormick et al 2023
105		Nevada	Desert Range	1	1	1	Howley & Jiang 2010
106			Split Mtns	1	1	0	Wotte et al 2011 / Montanez et al 2000 / Sundberg et al 2018 / Lin e tal 2019
107			Panaca Hills	1	1	1	Howley & Jiang 2010
108			Groom Range	1	0	0	Lin et al 2019
109			Oak Spring Summit	1	0	0	Faggetter et al 2017, 2019 / Lin et al 2019
110			Ruin Wash	1	0	0	Faggetter et al 2019
111			Frenchman Mts	1	1	1	Sundberg et al 2020 / Rowland et al 2023
112			Quatermaster Canyon	1	1	0	Rowland et al 2023
113			Tramp Ridge	1	1	0
114			Devils Cove	1	1	0
115			Blacktail Canyon	1	1	0
116			Fern Glan	1	1	0
117			Palisades	1	1	0
118			Nopah Range	1	1	0
119			Hidden Valley	1	0	0	Lin et al 2019
120			Lyndon Gulch	1	0	0
121		Utah	Wah Wah Mtns	1	1	1	Howley & Jiang 2010
122			House Range	1	1	1	Howley & Jiang 2010 / Langenburg 2003
123			Drum Mtns	1	1	1	Babcock et al 2007 / Howley & Jiang 2010 / Langenburg 2003
124		California	Emigrant Pass	1	0	0	Faggetter et al 2017,2019
125			Death Valley	1	1	0	Karlstrom et al 2020 / Montanez et al 2000 / Noriega-Ruiz et al 2020
126			San Bernardino Mtns	1	1	0	Noriega-Ruiz et al 2020
127		Nevada	E Grand Canyon	1	1	0	Karlstrom et al 2020
128		Arizona	W Grand Canyon	1	1	0
129		Arizona	S Arizona	1	1	0	Karlstrom et al 2020
130		New Mexico	New Mexico	1	1	0
131		Texas	Texas	1	1	0
132		Mexico	Caborca area	1	?	0	Noriega-Ruiz et al 2020 / Loyd et al 2012
133			El Sahural	1	?	0	Noriega-Ruiz 2020
134			San Jose de Garcia area	1	?	0	Nardin et al 2009 / Cuen-Romero et al 2016 / Noriega-Ruiz et al 2020
135		Virginia	Appalachian Mts	1	1	0	Read & Erikson 2012

## Sheet: Full references
Al-Husseini, M. I. (2010). Early Cambrian Asfar Sequence. Geoarabia, 15(1), 137-160.
Álvaro, J. J., & Clausen, S. (2007). Botoman (Lower Cambrian) turbid- and clear-water reefs and associated environments from the High Atlas, Morocco. In J. J. Álvaro, M. Aretz, F. Boulvain, A. Munnecke, D. Vachard, & E. Vennin (Eds.), Palaeozoic Reefs and Bioaccumulations: Climatic and Evolutionary Controls (Vol. 275, pp. 51-+). Geological Society, London, Special Publications. https://doi.org/10…
Álvaro, J. J. & Vizcaïno, D. (1998). Révision biostratigraphique du Cambrien moyen du versant méridional de la Montagne Noire (Languedoc, France). Bulletin de la société géologique de France, 169 (2), 233-242.
Álvaro, J. J., Ahlberg, P., & Axheimer, N. (2010). Skeletal carbonate productivity and phosphogenesis at the lower-middle Cambrian transition of Scania, southern Sweden. Geological Magazine, 147(1), 59-76. https://doi.org/10.1017/S0016756809990021
Álvaro, J. J., Casas, J. M., Clausen, S., & Quesada, C. (2018). Early Palaeozoic geodynamics in NW Gondwana. Journal of Iberian Geology, 44(4), 551-565. https://doi.org/10.1007/s41513-018-0079-x
Álvaro, J. J., Casas, J. M., & Quesada, C. (2020). Reconstructing the pre-Variscan puzzle of Cambro-Ordovician basement rocks in the southwestern European margin of Gondwana. Pannotia to Pangaea: Neoproterozoic and Paleozoic Orogenic Cycles in the Circum-Atlantic Region, 503, 531-562. https://doi.org/10.1144/Sp503-2020-89
Álvaro, J. J., Pour, M.G., Sanchez-Garcia, T., Zadeh, M.-R. K.-e., Hairapetian, V., & Popov, L. E. (2022). Stratigraphic and volcanic signatures of Miaolingian-Late Ordovician rift pulses in the Alborz Mountains, northern Iran. Journal of Asian Earth Sciences, 233, 1-25. https://doi.org/10.1016/j.jseaes.2022.105240
Babcock, L. E., Robison, R. A., Rees, M. N., Peng, S.-C., & Saltzman, M. R. (2007). The global boundary stratotype section and point (GSSP) of the Drumian stage (Cambrian) in the drum mountains, Utah, USA. Episodes, 30(2), 85-95. https://doi.org/10.18814/epiiugs/2007/v30i2/003
Birksmith, C., Brock, G. A., Betts, M. J., Holmes, J. D., & Zhang, Z. (2023). Chronostratigraphy of the Cambrian Series 2 – Miaolingian boundary, western Stansbury Basin, South Australia. In Paleo Down Under 3 - Abstract Book & Conference Guide.
Bouchard, M.L. (2019). Litho- and cheostratigraphy of the lower to middle Cambrian Mount Clark, Mount Cap and Saline formations in Hornaday River Canyon, Carcajou Range, and Norman Range, Northwest Territories. https://laurentian.scholaris.ca/items/945a017d-4e78-4701-8533-750aa2f09b13
Brabb, E. E. (1967). Stratigraphy of the Cambrian and Ordovician Rocks of East-Central Alaska. Geological Survey Professional Paper, 559(A).
Brasier, M. D., & Sukhov, S. S. (1998). The falling amplitude of carbon isotopic oscillations through the lower to middle Cambrian: northern Siberia data. Canadian Journal of Earth Sciences, 35(4), 353-373. https://doi.org/10.1139/e97-122
Chang, C., Hu, W., Wang, X., Yu, H., Yang, A., Cao, J., & Yao, S. (2017). Carbon isotope stratigraphy of the lower to middle Cambrian on the eastern Yangtze Platform, South China. Palaeogeography Palaeoclimatology Palaeoecology, 479, 90-101. https://doi.org/10.1016/j.palaeo.2017.04.019
Choi, D.K. & Park, T.-Y. (2017). Recent advances of trilobite research in Korea: Taxonomy, biostratigraphy, paleogeography, and ontogeny and phylogeny. Geosciences Journal, 21 (6), 891-911. https://doi.org/10.1007/s12303-017-0041-5
Choi, D.K., Lee, J.G., Lee, S.-B., Park, T.-Y., & Hong, P.S. (2016). Trilobite Biostratigraphy of the lower Paleozoic (Cambrian–Ordovician) Joseon Supergroup, Taebaeksan Basin, Korea. Acta Geologica Sinica, 90(6), 1976-1999. https://doi.org/10.1111/1755-6724.13016
Collom, C. J., Johnston, P. A., & Powell, W. G. (2009). Reinterpretation of 'Middle' Cambrian stratigraphy of the rifted western Laurentian margin: Burgess Shale Formation and contiguous units (Sauk II megasequence), Rocky Mountains, Canada. Palaeogeography Palaeoclimatology Palaeoecology, 277(1-2), 63-85. https://doi.org/10.1016/j.palaeo.2009.02.012
Cuen-Romero, F. J., Valdez-Holguín, J. E., Buitrón, B. E., Monreal, R., Sundberg, F., Montijo-González, A., & Minjarez-Sosa, I. (2016). Cambrian Stratigraphy of San José de Gracia, Sonora, Mexico: El Gavilán Formation, a new lithostratigraphic unit of middle Cambrian open shelf environment. Boletin De La Sociedad Geologica Mexicana, 68(3), 429-441. https://doi.org/10.18268/BSGM2016v68n3a4
Curtis, M. L., Leat, P. T., Riley, T. R., Storey, B. C., Millar, I. L., & Randall, D. E. (1999). Middle Cambrian rift-related volcanism in the Ellsworth Mountains, Antarctica: tectonic implications for the palaeo-Pacific margin of Gondwana. Tectonophysics, 304(4), 275-299. https://doi.org/10.1016/S0040-1951(99)00033-5
Degtyarev, K. E., Tolmacheva, T. Y., Tretyakov, A. A., Kotov, A. B., & Shatagin, K. N. (2016). Cambrian to Lower Ordovician Complexes of the Kokchetav Massif and Its Fringing (Northern Kazakhstan): Structure, Age, and Tectonic Settings. Geotectonics, 50(1), 71-142. https://doi.org/10.1134/S0016852116010027
Deiss, C. (1939). Cambrian formations of southwestern Alberta and southeastern British Columbia. Bulletin of the Geological Society of America, 50(5/8), 951-1026.
Dilliard, K. A., Pope, M. C., Coniglio, M., Hasiotis, S. T., & Lieberman, B. S. (2007). Stable isotope geochemistry of the lower Cambrian Sekwi Formation, Northwest Territories, Canada: Implications for ocean chemistry and secular curve generation. Palaeogeography Palaeoclimatology Palaeoecology, 256(3-4), 174-194. https://doi.org/10.1016/j.palaeo.2007.02.031
Dong, Y., Wang, J., Zhong, Y., Chen, A., Zheng, R., Zhu, P., Zhang, C., Han, Z., & Cui, Y. 2025. The paleoenvironmental evolution of the Cambrian Miaolingian Epoch in South China. Palaeogeography, Palaeoclimatology, Palaeoecology, 661, https://doi.org/10.1016/j.palaeo.2024.112713
Donnelly, T. H., Shergold, J. H., & Southgate, P. N. (1988). Anomalous Geochemical Signals from Phosphatic Middle Cambrian Rocks in the Southern Georgina Basin, Australia. Sedimentology, 35(4), 549-570. https://doi.org/10.1111/j.1365-3091.1988.tb01235.x
Dorjnamjaa, D., Voinkov, D. M., Enkhbaatar, B., & Altanshagai, G. (2016). A new look at the Precambrian and Cambrian event chronostratigraphic correlation of Mongolia. Paleontological Journal, 50(12), 1306-1313. https://doi.org/10.1134/S0031030116120066
El-Araby, A., & Abdel-Motelib, A. (1999). Depositional facies of the Cambrian Araba Formation in the Taba region, east Sinai, Egypt. Journal of African Earth Sciences, 29(3), 429-447. https://doi.org/10.1016/S0899-5362(99)00108-6
Elicki, O., & Geyer, G. (2013). The Cambrian trilobites of Jordan - taxonomy, systematic and stratigraphic significance. Acta Geologica Polonica, 63(1), 1-56.
Faggetter, L. E., Wignall, P. B., Pruss, S. B., Jones, D. S., Grasby, S., Widdowson, M., & Newton, R. J. (2019). Mercury chemostratigraphy across the Cambrian Series 2-Series 3 boundary: evidence for increased volcanic activity coincident with extinction? Chemical Geology, 510, 188-199. https://doi.org/10.1016/j.chemgeo.2019.02.006
Faggetter, L. E., Wignall, P. B., Pruss, S. B., Newton, R. J., Sun, Y. D., & Crowley, S. F. (2017). Trilobite extinctions, facies changes and the ROECE carbon isotope excursion at the Cambrian Series 2-3 boundary, Great Basin, western USA. Palaeogeography Palaeoclimatology Palaeoecology, 478, 53-66. https://doi.org/10.1016/j.palaeo.2017.04.009
Faggetter, L. E., Wignall, P. B., Pruss, S. B., Sun, Y. D., Raine, R. J., Newton, R. J., Widdowson, M., Joachimski, M. M., & Smith, P. M. (2016). Sequence stratigraphy, chemostratigraphy and facies analysis of Cambrian Series 2-Series 3 boundary strata in northwestern Scotland. Geological Magazine, 155(4), 865-877. https://doi.org/10.1017/S0016756816000947
Foglia, R. D., & Vaccari, N. E. (2010). Delamaran trilobites from the La Laja Formation, San Juan, Argentina. Ameghiniana, 47(4), 431-445. https://doi.org/10.5710/AMGH.v47i4.2
Geological summary of the eastern Warburton Basin, SA. Government of South Australia Retrieved from https://www.energymining.sa.gov.au/industry/energy-resources/geology-and-prospectivity/neoproterozoic-middle-paleozoic-basins/warburton-basin
Geological summary of the Officer Basin. Government of South Australia Retrieved from https://www.energymining.sa.gov.au/industry/energy-resources/geology-and-prospectivity/neoproterozoic-middle-paleozoic-basins/officer-basin
Ghavidel-Syooki, M., & Vecoli, M. (2008). Palynostratigraphy of Middle Cambrian to lowermost Ordovician stratal sequences in the High Zagros Mountains, southern Iran: Regional stratigraphic implications, and palaeobiogeographic significance. Review of Palaeobotany and Palynology, 150(1-4), 97-114. https://doi.org/10.1016/j.revpalbo.2008.01.006
Ghienne, J. F., Boumendjel, K., Paris, F., Videt, B., Racheboeuf, P., & Salem, H. A. (2007). The Cambrian-Ordovician succession in the Ougarta Range (western Algeria, North Africa) and interference of the Late Ordovician glaciation on the development of the Lower Palaeozoic transgression on northern Gondwana. Bulletin of Geosciences, 82(3), 183-214. https://doi.org/10.3140/bull.geosci.2007.03.183
Ghienne, J. F., Monod, O., Kozlu, H., & Dean, W. T. (2010). Cambrian-Ordovician depositional sequences in the Middle East: A perspective from Turkey. Earth-Science Reviews, 101(3-4), 101-146. https://doi.org/10.1016/j.earscirev.2010.04.004
Gomez, F. J., & Astini, R. A. (2015). Sedimentology and sequence stratigraphy from a mixed (carbonate-siliciclastic) rift to passive margin transition: The Early to Middle Cambrian of the Argentine Precordillera. Sedimentary Geology, 316, 39-61. https://doi.org/10.1016/j.sedgeo.2014.11.003
Gomez, F. J., Ogle, N., Astin, R. A., & Kalin, R. M. (2007). Paleoenvironmental and carbon-oxygen isotope record of middle Cambrian carbonates (la laja formation) in the Argentine precordillera. Journal of Sedimentary Research, 77(9-10), 826-842. https://doi.org/10.2110/jsr.2007.079
González, P. D., Sato, A. M., Naipauer, M., Varela, R., Basei, M., Sato, K., Llambías, E. J., Chemale, F., & Dorado, A. C. (2018). Patagonia-Antarctica Early Paleozoic conjugate margins: Cambrian synsedimentary silicic magmatism, U-Pb dating of K-bentonites, and related volcanogenic rocks. Gondwana Research, 63, 186-225. https://doi.org/10.1016/j.gr.2018.05.015
Gu, Q., Xing, F., Azmy, K., Jin, X., Chen, X., Zhang, C., Qian, H., & Wen, J. (2025). A comprehensive analysis of the Cambrian Drumian carbon isotopeexcursion (DICE): Insights from paleoclimate, paleoenvironment and global correlations. Sedimentary Geology, 481, 1-15. https://doi.org/10.1016/j.sedgeo.2025.106875
Guo, Q. J., Deng, Y. N., Hu, J., & Wang, L. Y. (2017). Carbonate carbon isotope evolution of seawater across the Ediacaran-Cambrian transition: evidence from the Keping area, Tarim Basin, NW China. Geological Magazine, 154(6), 1244-1256. https://doi.org/10.1017/S0016756817000206
Guo, Q. J., Strauss, H., Liu, C. Q., Zhao, Y. L., Yang, X. L., Peng, J., & Yang, H. (2010). A negative carbon isotope excursion defines the boundary from Cambrian Series 2 to Cambrian Series 3 on the Yangtze Platform, South China (vol 285, pg 143, 2010). Palaeogeography Palaeoclimatology Palaeoecology, 288(1-4), 118-118. https://doi.org/10.1016/j.palaeo.2010.01.022
Hall, P. A. (2012). Elemental, isotopic and molecular signatures of early Cambrian marine sediments and a phantom petroleum system in South Australia University of Adelaide. https://hdl.handle.net/2440/81757
Handkamer, N. M., Pratt, B. R., & MacNaughton, R. B. (2022). Biostratigraphy and paleoecology of the trilobite faunas from the Mount Clark and Mount Cap formations (early and middle Cambrian), eastern Mackenzie Mountains, northwestern Canada. Journal of Paleontology, 96, 1-47. https://doi.org/10.1017/jpa.2022.13
He, W. Y., Qi, Y. A., Dai, M. Y., Liu, B. C., Li, J. B., Xu, G. X., Wang, M., & Li, D. (2022). Facies Changes, Evolution of Biogenic Structures, and Carbon Isotope Stratigraphy of the Cambrian Series 2 to Miaolingian Transition on the Southern North China Craton. Minerals, 12(12). https://doi.org/10.3390/min12121526
Howley, R. A., & Jiang, G. (2010). The Cambrian Drumian carbon isotope excursion (DICE) in the Great Basin, western United States. Palaeogeography Palaeoclimatology Palaeoecology, 296(1-2), 138-150. https://doi.org/10.1016/j.palaeo.2010.07.001
Ineson, J. R., & Peel, S. (1997). Cambrian shelf stratigraphy of North Greenland. Geology of Greenland Survey Bulletin, 173.
Jago, J. B., Gehling, J. G., Paterson, J. R., Brock, G. A., & Zang, W. L. (2012). Cambrian stratigraphy and biostratigraphy of the Flinders Ranges and the north coast of Kangaroo Island, South Australia. Episodes, 35(1), 247-255. https://doi.org/10.18814/epiiugs/2012/v35i1/024
Jago, J. B., & Kruse, P. D. (2020). Significance of the middle Cambrian (Wuliuan) trilobite Pagetia from Yorke Peninsula, South Australia. Australian Journal of Earth Sciences, 67(7), 1003-1008. https://doi.org/10.1080/08120099.2019.1643405
Jago, J. B., Zang, W.-L., Brock, G. A., Paterson, J. R., & Skovsted, C. B. (2006). A review of the Cambrian biostratigraphy of South Australia. Palaeoworld, 15, 406-423. https://doi.org/10.1016/j.palwor.2006.10.014
Karlstrom, K. E., Mohr, M. T., Schmitz, M. D., Sundberg, F. A., Rowland, S. M., Blakey, R., Foster, J. R., Crossey, L. J., Dehler, C. M., & Hagadorn, J. W. (2020). Redefining the Tonto Group of Grand Canyon and recalibrating the Cambrian time scale. Geology, 48(5), 425-430. https://doi.org/10.1130/G46755.1
Khalifa, M. A., Soliman, H. E., & Wanas, H. A. (2006). The Cambrian Araba Formation in northeastern Egypt: Facies and depositional environments. Journal of Asian Earth Sciences, 27(6), 873-884. https://doi.org/10.1016/j.jseaes.2005.09.003
Khalifa, M. A. G. (2023). Ediacaran-Paleozoic Rock Units of Egypt. Springer Cham. https://doi.org/10.1007/978-3-031-27320-9
Kouchinsky, A., Alexander, R., Bengtson, S., Bowyer, F., Clausen, S., Holmer, L. E., Kolesnikov, K. A., Korovnikov, I. V., Pavlov, V., Skovsted, C. B., Ushatinskaya, G., Wood, R., & Zhuravlev, A. Y. (2022). Early-middle Cambrian stratigraphy and faunas from northern Siberia. Acta Palaeontologica Polonica, 67(2), 341-464. https://doi.org/10.4202/app.00930.2021
Kovár, V., Fatka, O., & Vodicka, J. (2022). Acritarch clusters from the Cambrian (Miaolingian) of the Pribram-Jince Basin, Czech Republic. Palynology, 47(1). https://doi.org/10.1080/01916122.2022.2115574
Kruse, P. D., & Zhuravlev, A. Y. (2008). Middle-Late Cambrian Rankenella-Girvanella reefs of the Mila Formation, northern Iran. Canadian Journal of Earth Sciences, 45(6), 619-639. https://doi.org/10.1139/E08-016
Landing, E., Geyer, G., Buchwaldt, R., & Bowring, S. A. (2014). Geochronology of the Cambrian: a precise Middle Cambrian U-Pb zircon date from the German margin of West Gondwana. Geological Magazine, 152(1), 28-40. https://doi.org/10.1017/S0016756814000119
Landing, E., Schmitz, M. D., Geyer, G., Trayler, R. B., & Bowring, S. A. (2020). Precise early Cambrian U-Pb zircon dates bracket the oldest trilobites and archaeocyaths in Moroccan West Gondwana. Geological Magazine, 158(2), 219-238. https://doi.org/10.1017/S0016756820000369
Landing, E., Westrop, S. R., & Geyer, G. (2022). Trans-Avalonian green-black boundary (early Middle Cambrian): transform fault-driven epeirogeny and onset of 26 m.y. of shallow-marine, black mudstone in Avalonia (Rhode Island-Belgium) and Baltica. Canadian Journal of Earth Sciences. https://doi.org/10.1139/cjes-2022-0065
Langenburg, E. S. (2003). The Middle Cambrian Wheeler Formation: Sequence Stratigraphy and Geochemistry Across a Ramp-to-Basin Transition Utah State University. https://digitalcommons.usu.edu/etd/4275
Laurie, J. R. (2012). Biostratigraphy of the Arthur Creek Formation and Thorntonia Limestone, Georgina Basin. Central Australian Basin Symposium III.
Lee, J. H., Hong, J., Woo, J., Oh, J. R., Lee, D. J., & Choh, S. J. (2016). Reefs in the Early Paleozoic Taebaek Group, Korea: A Review. Acta Geologica Sinica-English Edition, 90(1), 352-367. https://doi.org/10.1111/1755-6724.12659
Lehnert, O., Ahlberg, P., Calner, M. & Joachimski, M.M., 2013b: The Drumian Isotopic Carbon Excur-sion (DICE) in Scania, southern Sweden – a mirror of the onset of the Marjumiid Biomere at a time of increased primary production? Proceedings of the 3rd IGCP 591 – Annual Meeting Lund, Sweden, 9–19 June 2013, 172–174.
LeRoy, M.A., Gill, B.C., Sperling, E.A., McKenzie, N.R., & Park, T.-Y.S. (2021). Variable redox conditions as an evolutionary driver? A multi-basin comparison of redox in the middle and later Cambrian oceans (Drumian-Paibian). Palaeogeography, Palaeoclimatology, Palaeoecology, 566, 1-17. https://doi.org/10.1016/j.palaeo.2020.110209
Li, D., Zhang, X., Zhang, X., Zhu, H., Peng, S.-C., Sun, L., & Shen, Y. (2020). A paired carbonate-organic δ13C approach to understanding the Cambrian Drumian carbon isotope excursion (DICE). Precambrian Research, 349. https://doi.org/10.1016/j.precamres.2019.105503
Li, Z., Yang, X., Yuan, Y., Hu, Y., & Wang, D. (2025). Carbon isotope fluctuations from the Cambrian Jialao Formation in Jianhe County, Guizhou Province, China: Implications for stratigraphic correlation. Palaeogeography, Palaeoeclimatolotgy, Palaeoeocology, 661, 1-11. https://doi.org/10.1016/j.palaeo.2024.112680
Lin, J.-P., Sundberg, F. A., Jiang, G., Montañez, I. P., & Wotte, T. (2019). Chemostratigraphic correlations across the first major trilobite extinction and faunal turnovers between Laurentia and South China. Scientific Reports, 9. https://doi.org/10.1038/s41598-019-53685-2
Lindsay, J. F., Kruse, P. D., Green, O. R., Hawkins, E., Brasier, M. D., Cartlidge, J., & Corfield, R. M. (2005). The Neoproterozoic-Cambrian record in Australia: A stable isotope study. Precambrian Research, 143(1-4), 113-133. https://doi.org/10.1016/j.precamres.2005.10.002
Liu, H., Qi, M. H., Cao, T. T., Tan, J. Q., Yin, Z. S., & Cheng, B. (2023). Influence of dissolved organic carbon on the Cambrian Ocean: Evidence from the carbon isotopes of the sedimentary rocks of the Eastern Tarim Basin, North-west China. Geological Journal, 58(10), 3806-3818. https://doi.org/10.1002/gj.4809
Liu, Z. R. R., Zhou, M. F., Chen, W. T., Williams-Jones, A. E., Li, X. D., Yin, R. S., O'Brien, H., & Lahaye, Y. (2021). Mercury and sulfur isotopic evidence for the linkages between the ca. 510 Ma Kalkarindji large igneous province and trilobite crisis. Earth and Planetary Science Letters, 566. https://doi.org/10.1016/j.epsl.2021.116947
Loyd, S. J., Marenco, P. J., Hagadorn, J. W., Lyons, T. W., Kaufman, A. J., Sour-Tovar, F., & Corsetti, F. A. (2012). Sustained low marine sulfate concentrations from the Neoproterozoic to the Cambrian: Insights from carbonates of northwestern Mexico and eastern California. Earth and Planetary Science Letters, 339, 79-94. https://doi.org/10.1016/j.epsl.2012.05.032
Lundberg, F. (2016). Cambrian stratigraphy and depositional dynamics based on the Tomten-1 drill core, Falbygden, Västergötland, Sweden. Dissertation in Geology at Lund University, No. 462, 41 pp.
Makarova, A. L., Kupin, A. V., Komlev, D. A. & Bushuev, E. V. (2025). Trilobites and Biostratigraphy of the Cambrian Section of the Khantaysk-Sukhotungusskaya-1 Well, Northwest of the siberian Platform. Stratigraphy and Geological Correlation, 33 (1), 25-50. https://doi.org/10.1134/S0869593824700242
McCormick, C. A., Corlett, H., Clog, M., Boyce, A. J., Tartèse, R., Steele-MacInnis, M., & Hollis, C. (2023). Basin scale evolution of zebra textures in fault-controlled, hydrothermal dolomite bodies: Insights from the Western Canadian Sedimentary Basin. Basin Research, 35(5), 2010-2039. https://doi.org/10.1111/bre.12789
Mckerrow, W. S., Scotese, C. R., & Brasier, M. D. (1992). Early Cambrian Continental Reconstructions. Journal of the Geological Society, 149, 599-606. https://doi.org/10.1144/gsjgs.149.4.0599
Montañez, I. P., Osleger, D. A., Banner, J. L., Mack, L. E., & Musgrove, M. (2000). Evolution of the Sr and C Isotope Composition of Cambrian Oceans. GSA Today, 10(5), 7.
Myong-Chol, K., Jong-Hyok, Y., Peng, P., Zhiyue, Z., Hyon-Uk, P., Chang-Nam, B., Ung, P., Chol-Su, J., & Mingguo, Z. (2018). Carbon Isotope Excursions of Cambrian Hwangju and Bopdong Groups in Pyongnam Basin, Korean Peninsula. Earth Science, 43 (11), 4096-4108. https://doi.org/10.3799/dqkx.2018.107
Nardin, E., Almazán-Vásquez, E., & Buitrón-Sánchez, B. E. (2009). First report of Gogia (Eocrinoidea, Echinodermata) from the Early-Middle Cambrian of Sonora (Mexico), with biostratigraphical and palaeoecological comments. Geobios, 42(2), 233-242. https://doi.org/10.1016/j.geobios.2008.10.003
Nielsen, A. T., & Schovsbo, N. H. (2015). The regressive Early-Mid Cambrian 'Hawke Bay Event' in Baltoscandia: Epeirogenic uplift in concert with eustasy. Earth-Science Reviews, 151, 288-350. https://doi.org/10.1016/j.earscirev.2015.09.012
Noriega-Ruiz, H. A., Cuen-Romero, F. J., Enríquez-Ocaña, L. F., Sundberg, F. A., Monreal, R., Varela-Romero, A., Palafox-Reyes, J. J., & Grijalva-Noriega, F. J. (2020). Cambrian stratigraphy (Series 2 to Miaolingian) of the El Sahuaral area in central Sonora, Mexico: Biostratigraphic implications. Journal of South American Earth Sciences, 103. https://doi.org/10.1016/j.jsames.2020.102797
Oh, M.-K., Choi, T., Lee, S.-B., & Lee, J.-H. (2023). Lithostratigraphic revision of the siliciclastic-dominated basal Taebaek Group (lower–middle Cambrian), eastern Korea. Episodes, 1-20. https://doi.org/10.18814/epiiugs/2023/023010
Pagès, A., & Schmid, S. (2016). Euxinia linked to the Cambrian Drumian carbon isotope excursion (DICE) in Australia: Geochemical and chemostratigraphic evidence. Palaeogeography Palaeoclimatology Palaeoecology, 461, 65-76. https://doi.org/10.1016/j.palaeo.2016.08.008
Randall, D. E., & Mac Niocaill, C. (2004). Cambrian palaeomagnetic data confirm a Natal Embayment location for the Ellsworth-Whitmore Mountains, Antarctica, in Gondwana reconstructions. Geophysical Journal International, 157(1), 105-116. https://doi.org/10.1111/j.1365-246X.2004.02192.x
Ren, Y., Zhong, D., Gao, C., Liang, T., Sun, H., Wu, D., & Zheng, X. (2017). High-resolution carbon isotope records and correlations of the lower Cambrian Longwangmiao Formation (Stage 4, Toyonian) in Chongqing, South China. Palaeogeography Palaeoclimatology Palaeoecology, 485, 572-592. https://doi.org/10.1016/j.palaeo.2017.07.013
Rowland, S. M., Korolev, S., Hagadorn, J. W., & Ghosh, K. (2023). Frenchman Mountain Dolostone: A new formation of the Cambrian Tonto Group, Grand Canyon and Basin and Range, USA. Geosphere. https://doi.org/10.1130/Ges02514.1
Schmid, S. (2017). Chemostratigraphy and palaeo-environmental characterisation of the Cambrian stratigraphy in the Amadeus Basin, Australia. Chemical Geology, 451, 169-182. https://doi.org/10.1016/j.chemgeo.2017.01.019
Scotese, C. R. (2014). Atlas of Cambrian and Early Ordovician Paleogeographic Maps (Mollweide Projection), Maps 81-88, Volumes 5, The Early Paleozoic, PALEOMAP Atlas for ArcGIS, PALEOMAP Project, Evanston, IL.
Scotese, C. R. (2016). PALEOMAP Paleoatlas for GPlates and the PaleoData Plotter Program, PALEOMAP Project. 1-59. http://www.earthbyte.org/paleomap-paleoatlas-for-gplates
Scotese, C. R. (2021). An Atlas of Phanerozoic Paleogeographic Maps: The Seas Come In and the Seas Go Out. Annual Review of Earth and Planetary Sciences, Vol 49, 2021, 49, 679-+. https://doi.org/10.1146/annurev-earth-081320-064052
Scott, R.W., Turner, E.C., MacNaughton, R.B., & Fallas, K.M. (2022). Biostratigraphic evidence for incremental tectonic development of early Cambrian deep-water environments in theMisty Creek embayment (Selwyn basin, Northwest Territories, Canada). Canadian Journal of Earth Sciences, 59, 216-231. https://doi.org/10.1139/cjes-2021-0049
Shabanov, Y. Y., Korovnikov, I. V., Pereladov, V. S., Pak, K. L., & Feflov, A. F. (2008). The section of the Kuonamka Formation of the Molodo River - a candidate for a global stratigraphy of the lower boundary of the Middle Cambrian (East Siberian Platform) Cambrian sections of the Siberian Platform—stratotype candidates for an international stratigraphic scaling (Stratigraphy and Palaeontology).…
Shembilu, N., & Azmy, K. (2021). Carbon-isotope stratigraphy of the Middle-Upper Cambrian in eastern Laurentia: Implications for global correlation. Marine and Petroleum Geology, 128. https://doi.org/10.1016/j.marpetgeo.2021.105052
Singh, B. P., Bhargava, O. N., Sharma, C. A., Chaubey, R. S., Prasad, S. K., Negi, R. S., & Kishore, N. (2017a). Treptichnus ichnogenus from the Cambrian of India and Bhutan: Its Relevance to the Precambrian-Cambrian Boundary. Journal of the Palaeontological Society of India, 62(1), 39-49.
Singh, B. P., Chaubey, R. S., Bhargava, O. N., Prasad, S. K., & Negi, R. S. (2017b). The Cambrian trilobite fauna from the Shian (Saybang) section, Pin Valley (Spiti) and its biostratigraphic significance. Palaeoworld, 26(1), 25-36. https://doi.org/10.1016/j.palwor.2016.04.002
Singh, B. P., Singla, G., Bhargava, O. N., Kaur, R., & Stopden, S. (2020). Miaolingian transgression and the Oryctocephalus indicus biozone in the Sumna Valley (Spiti), Himalaya, India. Comptes Rendus Geoscience, 352(2), 157-168. https://doi.org/10.5802/crgeos.14
Stadnik, R., Bebenek, S., & Waskowska, A. (2019). Facies Architecture of the Cambrian Deposits of the Baltica Shelf in the Lublin Basin, Se Poland. Annales Societatis Geologorum Poloniae, 89(2), 105-120. https://doi.org/10.14241/asgp.2019.14
Strauss, J. V., Macdonald, F. A., Taylor, J. F., Repetski, J. E., & McClelland, W. C. (2013). Laurentian origin for the North Slope of Alaska: Implications for the tectonic evolution of the Arctic. Lithosphere, 5(5), 477-482. https://doi.org/10.1130/L284.1
Sun, Z. X., Yang, A. H., Zhao, F. C., Zhuravlev, A. Y., Pan, B., Hu, C. L., Feng, Q., Chen, X., & Zhu, M. Y. (2023). New trilobite assemblage from the lower Cambrian (upper Stage 4) of the Lake Zone, western Mongolia. Journal of Paleontology, 97(3), 577-590. https://doi.org/10.1017/jpa.2023.23
Sundberg, F. A. (2018). Trilobite biostratigraphy of the Cambrian 5 and Drumian stages, Series 3 (Laurentian Delamaran, Topazan, and Marjuman stages, Lincolnian Series) of the lower Emigrant Formation at Clayton Ridge, Esmeralda County, Nevada. Journal of Paleontology, 92, 1-44. https://doi.org/10.1017/jpa.2017.130
Sundberg, F. A., Karlstrom, K. E., Geyer, G., Foster, J. R., Hagadorn, J. W., Mohr, M. T., Schmitz, M. D., Dehler, C. M., & Crossey, L. J. (2020). Asynchronous trilobite extinctions at the early to middle Cambrian transition. Geology, 48(5), 441-445. https://doi.org/10.1130/G46913.1
Torsvik, T. H., & Cocks, L. R. M. (2013). Gondwana from top to base in space and time. Gondwana Research, 24(3-4), 999-1030. https://doi.org/10.1016/j.gr.2013.06.012
Torsvik, T. H., & Cocks, L. R. M. (2016). Cambrian. In Earth History and Palaeogeography (pp. 85-100). Cambridge: Cambrige University Press. https://doi.org/doi:10.1017/9781316225523.006
Tran, T. V., Faure, M., Nguyen, V. V., Bui, H. H., Fyhn, M. B. W., Nguyen, T. Q., Lepvrier, C., Thomsen, T. B., Tani, K., & Charusiri, P. (2020). Neoproterozoic to Early Triassic tectono-stratigraphic evolution of Indochina and adjacent areas: A review with new data. Journal of Asian Earth Sciences, 191. https://doi.org/10.1016/j.jseaes.2020.104231
Turner, E.C., (2015). Base-metal enrichment in Stage-5 (mid-Cambrian) black shale of the Hess River Formation, Misty Creek Embayment, Selwyn Basin, In: Paradis, S., ed., Targeted Geoscience Initiative 4: sediment-hosted Zn-Pb deposits: processes and implications for exploration. Geological Survey of Canada, Open File 7838, p. 75-95. https://doi.org/10.4095/296328
Wang, X. L., Hu, W. X., Yao, S. P., Chen, Q., & Xie, X. M. (2011). Carbon and strontium isotopes and global correlation of Cambrian Series 2-Series 3 carbonate rocks in the Keping area of the northwestern Tarim Basin, NW China. Marine and Petroleum Geology, 28(5), 992-1002. https://doi.org/10.1016/j.marpetgeo.2011.01.006
Wang., Z., & Gong, Y. (2023). Composition and Construction of High- and Low-Energy Ooid Shoals and Their Relationships with Environmental Changes: A Case Study from the Cambrian Zhangxia Formation in the Ordos Basin, North China. Journal of Earth Science, 34(1), 156-172. https://doi.org/10.1007/s12583-020-1097-0
Weissbrod, T. (2003). Middle to Late Cambrian vertical movements in Sinai and the Eastern Desert of Egypt: Lithostratigraphic consequences. Israel Journal of Earth Sciences, 52(2), 98-111. https://doi.org/10.1560/R1WU-TB9J-UF4G-H3NH
Wendorff, M. (2019). Facies Architecture of the Cambrian Succession at the Western Margin of Baltica in the Podlasie Region (E Poland). Annales Societatis Geologorum Poloniae, 89(4), 453-469. https://doi.org/10.14241/asgp.2019.24
Wotte, T., Strauss, H., Fugmann, A., & Garbe-Schönber, D. (2012). Paired delta S34 data from carbonate-associated sulfate and chromium-reducible sulfur across the traditional Lower-Middle Cambrian boundary of W-Gondwana. Geochimica Et Cosmochimica Acta, 85, 228-253. https://doi.org/10.1016/j.gca.2012.02.013
Wotte, T., Strauss, H., & Sundberg, F. A. (2011). Carbon and Sulfur Isotopes from the Cambiran Series 2 - Cambrian Series 3 of Laurentia and Siberia. Museum of Northern Arizona Bulletin, 67, 43-63.
Wu, Y. S., Wang, W., Jiang, H. X., Cui, Y., Zhao, R., Huang, Z. B., Yang, Z. L., & Chen, Y. Q. (2021). Evolution patterns of seawater carbon isotope composition during the Cambrian and their stratigraphic significance. Geological Journal, 56(1), 457-474. https://doi.org/10.1002/gj.3957
Yang, X., Li, Z., Gao, B., & Zhou, Y. (2021). The Cambrian Drumian carbon isotope excursion (DICE) in the Keping area of the northwestern Tarim Basin, NW China. Palaeogeography Palaeoclimatology Palaeoecology, 571. https://doi.org/10.1016/j.palaeo.2021.110385
Zang, W.-L., Moczydłowska, M., & Jago, J. B. (2007). Early Cambrian acritarch assemblage zones in South Australia and global correlation. Memoirs of the Association of Australasian Palaeontologists, 33, 141-177.
Zhang, P., Wang, Y., Zhang, X., Wei, Z., Wang, G., Zhang, T., Ma, H., Wei, J., He, W., Ma, X., & Zhu, C. (2022). Carbon, oxygen and strontium isotopic and elemental characteristics of the Cambrian Longwangmiao Formation in South China: Paleoenvironmental significance and implications for carbon isotope excursions. Gondwana Research, 106, 174-190. https://doi.org/10.1016/j.gr.2022.01.008
Zhang, W. H., Shi, X. Y., Jiang, G. Q., Tang, D. J., & Wang, X. Q. (2015). Mass-occurrence of oncoids at the Cambrian Series 2-Series 3 transition: Implications for microbial resurgence following an Early Cambrian extinction. Gondwana Research, 28(1), 432-450. https://doi.org/10.1016/j.gr.2014.03.015
Zhen, Y. Y., Laurie, J. R., & Nicoll, R. S. (2011). Cambrian and Ordovician stratigraphy and biostratigraphy of the Arafura Basin, offshore Northern Territory. Memoirs of the Association of Australasian Palaeontologists, 42, 437-457.
Zhu, M.-Y., Zhang, J. M., Li, G. X., & Yang, A. H. (2004). Evolution of C isotopes in the Cambrian of China: implications for Cambrian subdivision and trilobite mass extinctions. Geobios, 37(2), 287-301. https://doi.org/10.1016/j.geobios.2003.06.001
Zuo, J. X., Peng, S. C., Zhu, X. J., (2008). Carbon-Isotope Composition of Cambrian Carbonate Rocks in Yangtze Platform, South China and Its Geological Implications. Geochimica, 37(2): 118–128. https://doi.org/10.3321/j.issn:0379-1726.2008.02.003
Zuo, J., Peng, S.C., Qi, Y., Zhu, X., Bagnoli, G., & Fang., H. (2018). Carbon-Isotope Excursions Recorded in the Cambrian System, South China: Implications for Mass Extinctions and Sea-Level Fluctuations. Journal of Earth Science, 29(3), 479-491. https://doi.org/10.1007/s12583-017-0963-x
Zuo, J., Zhu, X., Chen, Y., & Zhai, W. (2023). Carbon Isotope from Shallow Marine System in North China: Implications for Stratigraphical Correlation and Sea-Level Changes in Cambrian. Journal of Earth Science, 34(6), 1777-1792. https://doi.org/https://doi.org/10.1007/s12583-021-1463-6
