# Supplementary material for: Astronomical calibration of the middle Cambrian in Baltica: Global carbon cycle synchronization and climate dynamics
Source: Research Square preprint supplement (doi:10.21203/rs.3.rs-7509865/v1), 2025-09-11
Supplement: Supplementary file 5 [file f0871258abd4a736bfd1f714.xlsx]

## Sheet: 13Corg
Stage	Scandinavian Superzone	Biozone	Adjusted depth (m)	Radioisotopically anchored astrolomical time (Ma)	δ13Corg (‰V-PDB)	Remarks
Paibian	Olenus	Olenus	61.63	497.003	-28.47		Zhao et al (2022b) data
Paibian	Olenus	Olenus	61.7	497.015	-29.17		This study data
Paibian	Olenus	Olenus	61.79	497.03	-29.05
Paibian	Olenus	Olenus	61.96	497.058	-28.61
Paibian	Olenus	Olenus	61.97	497.06	-28.73
Paibian	Olenus	Olenus	62.16	497.092	-28.34
Paibian	Olenus	Olenus	62.26	497.108	-29.24
Paibian	Olenus	Olenus	62.4	497.132	-28.67
Paibian	Olenus	Olenus	62.58	497.161	-28.63
Paibian	Olenus	Olenus	62.71	497.183	-29.03
Paibian	Olenus	Olenus	62.78	497.195	-28.8
Paibian	Olenus	Olenus	63.05	497.24	-29.29
Paibian	Olenus	Olenus	63.14	497.255	-29.24
Paibian	Olenus	Olenus	63.27	497.276	-28.91
Guzhangian ?	P. forchhammeri ?	P. forchhammeri ?	63.42	497.301	-29.23
Guzhangian ?	P. forchhammeri ?	P. forchhammeri ?	63.62	497.335	-29.1
Guzhangian ?	P. forchhammeri ?	P. forchhammeri ?	63.89	497.382	-30.02
Guzhangian ?	P. forchhammeri ?	P. forchhammeri ?	64.17	497.512	-29.94
Guzhangian	P. forchhammeri	P. forchhammeri	64.34	497.59	-28.93
Guzhangian	P. forchhammeri	P. forchhammeri	64.51	497.669	-30.36
Guzhangian	P. forchhammeri	P. forchhammeri	64.77	497.787	-29.15
Guzhangian	P. forchhammeri	P. forchhammeri	65.02	497.857	-29.78
Guzhangian	P. forchhammeri	P. forchhammeri	65.31	497.938	-29.6
Guzhangian	P. forchhammeri	P. forchhammeri	65.31	497.938	-28.84
Guzhangian	P. forchhammeri	P. forchhammeri	65.59	498.017	-28.95
Guzhangian	P. forchhammeri	P. forchhammeri	65.87	498.095	-29.02
Guzhangian	P. forchhammeri	P. forchhammeri	65.96	498.121	-29.64
Guzhangian	P. forchhammeri	P. forchhammeri	66.12	498.166	-29.5
Guzhangian	P. forchhammeri	P. forchhammeri	66.36	498.233	-28.95
Guzhangian	P. forchhammeri	P. forchhammeri	66.65	498.315	-29.59
Guzhangian	P. forchhammeri	P. forchhammeri	66.9	498.386	-29.8
Guzhangian	P. forchhammeri	P. forchhammeri	66.93	498.394	-29.43
Guzhangian	P. forchhammeri	P. forchhammeri	67.19	498.468	-30.2
Guzhangian	P. forchhammeri	P. forchhammeri	67.22	498.476	-29.18
Guzhangian	P. forchhammeri	P. forchhammeri	67.54	498.567	-29.54
Guzhangian	P. forchhammeri	P. forchhammeri	67.79	498.624	-30.19
Guzhangian	P. forchhammeri	P. forchhammeri	67.99	498.664	-28.96
Guzhangian	P. forchhammeri	P. forchhammeri	68.29	498.723	-29.82
Guzhangian	P. forchhammeri	P. forchhammeri	68.54	498.772	-29.96
Guzhangian	P. forchhammeri	P. forchhammeri	68.81	498.825	-30.69
Guzhangian	P. forchhammeri	P. forchhammeri	69.31	498.923	-29.86
Guzhangian	P. forchhammeri	P. forchhammeri	69.81	499.031	-30.47
Guzhangian	P. forchhammeri	P. forchhammeri	70.04	499.094	-29.9
Guzhangian	P. forchhammeri	P. forchhammeri	70.29	499.163	-29.52
Guzhangian	P. forchhammeri	P. forchhammeri	70.52	499.226	-29.27
Guzhangian	P. forchhammeri	P. forchhammeri	70.8	499.303	-30.12
Guzhangian	P. forchhammeri	P. forchhammeri	70.95	499.344	-29.31
Guzhangian	P. forchhammeri	P. forchhammeri	71.04	499.368	-30.18
Guzhangian	P. forchhammeri	P. forchhammeri	71.29	499.428	-30.58
Guzhangian	P. forchammeri	L. Laevigata	71.41	499.451	-30.3145
Guzhangian	P. forchhammeri	L. Laevigata	71.49	499.467	-30.04
Guzhangian	P. forchammeri	L. Laevigata	71.57	499.483	-30.4809
Guzhangian	P. forchhammeri	L. Laevigata	71.72	499.513	-30.6627
Guzhangian	P. forchammeri	L. Laevigata	71.73	499.515	-31.1
Guzhangian	P. forchhammeri	L. Laevigata	71.87	499.543	-30.6883
Guzhangian	P. forchhammeri	L. Laevigata	72.03	499.575	-30.52
Guzhangian	P. forchhammeri	L. Laevigata	72.07	499.583	-30.5873
Guzhangian	P. forchhammeri	L. Laevigata	72.08	499.585	-32.57
Guzhangian	P. forchhammeri	L. Laevigata	72.22	499.613	-30.7516
Guzhangian	P. forchhammeri	L. Laevigata	72.26	499.62	-32.3
Guzhangian	P. forchhammeri	L. Laevigata	72.36	499.64	-30.8748
Guzhangian	P. forchhammeri	L. Laevigata	72.48	499.664	-30.8941
Guzhangian	P. forchammeri	L. Laevigata	72.54	499.676	-32.22
Guzhangian	P. forchammeri	L. Laevigata	72.62	499.692	-30.7171
Guzhangian	P. forchammeri	L. Laevigata	72.77	499.722	-30.614
Guzhangian	P. forchammeri	L. Laevigata	72.83	499.734	-31.55
Guzhangian	P. forchammeri	L. Laevigata	72.89	499.746	-30.5429
Guzhangian	P. forchammeri	L. Laevigata	73.04	499.776	-30.1346
Guzhangian	P. forchammeri	L. Laevigata	73.13	499.794	-32.9
Guzhangian	P. forchammeri	L. Laevigata	73.19	499.805	-30.8303
Guzhangian	P. forchammeri	L. Laevigata	73.3	499.827	-31.7
Guzhangian	P. forchammeri	L. Laevigata	73.38	499.844	-30.79
Guzhangian	P. forchammeri	L. Laevigata	73.39	499.846	-30.5803
Guzhangian	P. forchammeri	L. Laevigata	73.54	499.875	-30.6356
Guzhangian	P. forchammeri	L. Laevigata	73.69	499.906	-30.4761
Guzhangian	P. forchammeri	L. Laevigata	73.84	499.936	-30.7822
Guzhangian	P. forchammeri	L. Laevigata	73.99	499.966	-28.4643	Limestone?
Guzhangian	P. forchammeri	L. Laevigata	74.16	500	-31.2011
Guzhangian	P. forchammeri	L. Laevigata	74.32	500.032	-30.8751
Guzhangian	P. forchammeri	L. Laevigata	74.47	500.062	-29.2697	Limestone?
Guzhangian	P. forchammeri	L. Laevigata	74.62	500.093	-31.2087
Guzhangian	P. forchammeri	L. Laevigata	74.77	500.123	-31.2331
Guzhangian	P. forchammeri	L. Laevigata	74.92	500.153	-30.9195
Guzhangian	P. forchammeri	L. Laevigata	75.07	500.183	-30.8011
Guzhangian	P. forchammeri	L. Laevigata	75.24	500.218	-28.7377	Andrarum Limestone
Guzhangian	P. forchammeri	L. Laevigata	75.38	500.246	-28.3143
Guzhangian	P. forchammeri	L. Laevigata	75.53	500.277	-27.9484
Guzhangian	P. forchammeri	L. Laevigata	75.69	500.309	-28.1949
Guzhangian	P. forchammeri	L. Laevigata	75.84	500.34	-28.2852
Guzhangian	P. forchammeri	L. Laevigata	75.99	500.37	-27.8187
Guzhangian	P. forchammeri	L. Laevigata	76.15	500.403	-27.6172
Guzhangian	P. forchammeri	L. Laevigata	76.3	500.433	-30.8056
Drumian	P. forchammeri	G. nathorsti	76.45	500.464	-30.6578	Mean of the above and below Corg values
Drumian	P. forchammeri	G. nathorsti	76.62	500.499	-30.51
Drumian	P. forchammeri	G. nathorsti	76.77	500.529	-30.73
Drumian	P. forchammeri	G. nathorsti	76.92	500.56	-30.68
Drumian	P. forchammeri	G. nathorsti	77.08	500.593	-30.9
Drumian	P. forchammeri	G. nathorsti	77.23	500.624	-30.88
Drumian	P. forchammeri	G. nathorsti	77.38	500.655	-30.86
Drumian	P. forchammeri	G. nathorsti	77.51	500.681	-30.84
Drumian	P. forchammeri	G. nathorsti	77.68	500.716	-30.84
Drumian	P. forchammeri	G. nathorsti	77.83	500.747	-30.86
Drumian	P. forchammeri	G. nathorsti	77.99	500.78	-30.78
Drumian	P. forchammeri	G. nathorsti	78.14	500.811	-30.92
Drumian	P. forchammeri	G. nathorsti	78.29	500.842	-30.82
Drumian	P. forchammeri	G. nathorsti	78.45	500.875	-30.85
Drumian	P. forchammeri	G. nathorsti	78.57	500.9	-30.91
Drumian	P. forchammeri	G. nathorsti	78.72	500.931	-30.87
Drumian	P. forchammeri	G. nathorsti	78.87	500.962	-30.87
Drumian	P. forchammeri	G. nathorsti	79.02	500.993	-30.89
Drumian	P. forchammeri	G. nathorsti	79.17	501.024	-30.85
Drumian	P. paradoxissimus	P. punctuosus	79.33	501.058	-30.8
Drumian	P. paradoxissimus	P. punctuosus	79.49	501.092	-30.72
Drumian	P. paradoxissimus	P. punctuosus	79.62	501.119	-30.95
Drumian	P. paradoxissimus	P. punctuosus	79.77	501.151	-30.92
Drumian	P. paradoxissimus	P. punctuosus	79.88	501.174	-30.98
Drumian	P. paradoxissimus	P. punctuosus	80.03	501.205	-30.87
Drumian	P. paradoxissimus	P. punctuosus	80.17	501.235	-30.93
Drumian	P. paradoxissimus	P. punctuosus	80.32	501.268	-31
Drumian	P. paradoxissimus	P. punctuosus	80.48	501.302	-30.97
Drumian	P. paradoxissimus	P. punctuosus	80.65	501.338	-31.03
Drumian	P. paradoxissimus	P. punctuosus	80.8	501.37	-31.03
Drumian	P. paradoxissimus	P. punctuosus	80.95	501.403	-30.96
Drumian	P. paradoxissimus	P. punctuosus	81.11	501.438	-30.96
Drumian	P. paradoxissimus	P. punctuosus	81.26	501.471	-31
Drumian	P. paradoxissimus	P. punctuosus	81.41	501.504	-31
Drumian	P. paradoxissimus	P. punctuosus	81.57	501.539	-31.11
Drumian	P. paradoxissimus	P. punctuosus	81.72	501.572	-30.9305
Drumian	P. paradoxissimus	P. punctuosus	81.88	501.608	-30.9875
Drumian	P. paradoxissimus	P. punctuosus	82.1	501.657	-30.8026
Drumian	P. paradoxissimus	P. punctuosus	82.25	501.69	-30.7841
Drumian	P. paradoxissimus	P. punctuosus	82.4	501.723	-30.994
Drumian	P. paradoxissimus	P. punctuosus	82.55	501.758	-30.9225
Drumian	P. paradoxissimus	P. punctuosus	82.7	501.793	-30.9825
Drumian	P. paradoxissimus	P. punctuosus	82.85	501.828	-30.8792
Drumian	P. paradoxissimus	P. punctuosus	83.09	501.883	-30.8107
Drumian	P. paradoxissimus	P. punctuosus	83.24	501.919	-30.9115
Drumian	P. paradoxissimus	P. punctuosus	83.39	501.956	-30.9603
Drumian	P. paradoxissimus	P. punctuosus	83.51	501.985	-30.9234
Drumian	P. paradoxissimus	P. punctuosus	83.66	502.021	-30.7315
Drumian	P. paradoxissimus	P. punctuosus	83.81	502.058	-30.8812
Drumian	P. paradoxissimus	P. punctuosus	83.95	502.09	-30.9025
Drumian	P. paradoxissimus	P. punctuosus	84.1	502.124	-30.9492
Drumian	P. paradoxissimus	P. punctuosus	84.25	502.158	-30.895
Drumian	P. paradoxissimus	P. punctuosus	84.41	502.194	-30.9233
Drumian	P. paradoxissimus	P. punctuosus	84.56	502.227	-31.0333
Drumian	P. paradoxissimus	P. punctuosus	84.7	502.258	-31.0576
Drumian	P. paradoxissimus	P. punctuosus	84.82	502.283	-31.0604
Drumian	P. paradoxissimus	P. punctuosus	84.94	502.309	-30.9583
Drumian	P. paradoxissimus	P. punctuosus	85.09	502.341	-30.9479
Drumian	P. paradoxissimus	P. punctuosus	85.24	502.373	-31.1302
Drumian	P. paradoxissimus	P. punctuosus	85.39	502.404	-31.0097
Drumian	P. paradoxissimus	P. punctuosus	85.54	502.436	-30.8985
Drumian	P. paradoxissimus	P. punctuosus	85.68	502.465	-31.0349
Drumian	P. paradoxissimus	P. punctuosus	85.83	502.496	-31.0102
Drumian	P. paradoxissimus	P. atavus	85.98	502.527	-30.9835
Drumian	P. paradoxissimus	P. atavus	86.14	502.56	-30.8101
Drumian	P. paradoxissimus	P. atavus	86.29	502.592	-30.7376
Drumian	P. paradoxissimus	P. atavus	86.44	502.623	-30.7292
Drumian	P. paradoxissimus	P. atavus	86.55	502.645	-30.6842
Drumian	P. paradoxissimus	P. atavus	86.66	502.668	-30.5995
Drumian	P. paradoxissimus	P. atavus	86.78	502.693	-30.6872
Drumian	P. paradoxissimus	P. atavus	86.89	502.715	-30.8292
Drumian	P. paradoxissimus	P. atavus	87	502.738	-30.9427
Drumian	P. paradoxissimus	P. atavus	87.11	502.761	-31.0327
Drumian	P. paradoxissimus	P. atavus	87.26	502.792	-30.9719
Drumian	P. paradoxissimus	P. atavus	87.41	502.823	-31.0507
Drumian	P. paradoxissimus	P. atavus	87.54	502.849	-31.0602
Drumian	P. paradoxissimus	P. atavus	87.69	502.88	-31.2438
Drumian	P. paradoxissimus	P. atavus	87.84	502.911	-31.2054
Drumian	P. paradoxissimus	P. atavus	87.98	502.94	-31.3544
Drumian	P. paradoxissimus	P. atavus	88.13	502.971	-31.3689
Drumian	P. paradoxissimus	P. atavus	88.29	503.004	-31.5006
Drumian	P. paradoxissimus	P. atavus	88.44	503.035	-31.5039
Drumian	P. paradoxissimus	P. atavus	88.59	503.067	-31.5907
Drumian	P. paradoxissimus	P. atavus	88.74	503.098	-31.5777
Drumian	P. paradoxissimus	P. atavus	88.87	503.125	-31.5719
Drumian	P. paradoxissimus	P. atavus	89	503.152	-31.6241
Drumian	P. paradoxissimus	P. atavus	89.17	503.188	-31.6437	Anthraconite (no influence on the Corg signal)
Drumian	P. paradoxissimus	P. atavus	89.26	503.206	-31.6917
Drumian	P. paradoxissimus	P. atavus	89.29	503.213	-31.7093
Drumian	P. paradoxissimus	P. atavus	89.4	503.236	-31.6851
Drumian	P. paradoxissimus	P. atavus	89.57	503.271	-31.6193
Drumian	P. paradoxissimus	P. atavus	89.73	503.306	-31.769
Wuliuan	P. paradoxissimus	P. gibbus	89.89	503.34	-31.9025
Wuliuan	P. paradoxissimus	P. gibbus	90.06	503.377	-31.9383
Wuliuan	P. paradoxissimus	P. gibbus	90.22	503.411	-31.7921
Wuliuan	P. paradoxissimus	P. gibbus	90.38	503.446	-29.8257	Exullans limestone
Wuliuan	P. paradoxissimus	P. gibbus	90.54	503.482	-30.0325
Wuliuan	P. paradoxissimus	P. gibbus	90.69	503.515	-31.1374
Wuliuan	P. paradoxissimus	P. gibbus	90.84	503.549	-30.9793
Wuliuan	P. paradoxissimus	P. gibbus	90.97	503.579	-32.8753
Wuliuan	P. paradoxissimus	P. gibbus	91.12	503.612	-32.8257
Wuliuan	P. paradoxissimus	P. gibbus	91.27	503.646	-32.8867
Wuliuan	P. paradoxissimus	P. gibbus	91.4	503.676	-32.7701	Mean of the above and below Corg values
Wuliuan	P. paradoxissimus	P. gibbus	91.55	503.709	-32.6534
Wuliuan	P. paradoxissimus	P. gibbus	91.7	503.743	-32.801
Wuliuan	P. paradoxissimus	P. gibbus	91.82	503.77	-32.83
Wuliuan	P. paradoxissimus	P. gibbus	91.97	503.804	-32.7904
Wuliuan	P. paradoxissimus	P. gibbus	92.12	503.836	-32.7426
Wuliuan	P. paradoxissimus	P. gibbus	92.26	503.867	-32.6937
Wuliuan	P. paradoxissimus	P. gibbus	92.41	503.899	-32.8158
Wuliuan	P. paradoxissimus	P. gibbus	92.52	503.923	-32.8591
Wuliuan	P. paradoxissimus	P. gibbus	92.67	503.955	-31.2014	Limestone?
Wuliuan	P. paradoxissimus	P. gibbus	92.82	503.987	-32.9282
Wuliuan	P. paradoxissimus	P. gibbus	92.97	504.019	-32.9224
Wuliuan	P. paradoxissimus	P. gibbus	93.08	504.042	-32.9687
Wuliuan	P. paradoxissimus	P. gibbus	93.23	504.074	-32.8411
Wuliuan	P. paradoxissimus	P. gibbus	93.38	504.106	-32.8997
Wuliuan	P. paradoxissimus	P. gibbus	93.6	504.152	-32.4896

## Sheet: RockEval
Core Box	Formation	Lithology	Sample ID	Core Depth [m]	Corrected Depth [m]	Adjusted depth [m]	Time [Ma]	PC [%]	RC [%]	TOC [%]	MINC [%]	HI [mg HC/g TOC]	OI [mg CO2/g TOC]	Tmax [°C]	S1 [mg HC/g]	S2a [mg HC/g]	S2b [mg HC/g]	S3	% Carbonates	δ13Corg [‰] - all
25	Alum Shale	Shale	ADC-1	210.178	210.358	71.41	499.451	0.03483	5.6941	5.72893	0.109266	4.07337	3.80501	382.022	0.114651	0.23336	0	0.217986	0.871505	-30.3145
25	Alum Shale	Shale	ADC-2	210.338	210.518	71.57	499.483	0.0187411	6.40266	6.4214	0.124696	1.73932	3.81998	431.043	0.0335066	0.111689	0	0.245296	0.994574	-30.4809
25	Alum Shale	Shale	ADC-3	210.488	210.668	71.72	499.513	0.0276825	8.47735	8.50504	0.454773	1.67258	4.8081	607.065	0.0569014	0.142253	0	0.408931	3.62727	-30.6627
25	Alum Shale	Shale	ADC-4	210.638	210.818	71.87	499.543	0.0182875	4.97009	4.98837	0.11111	2.24226	3.82655	426.087	0.0457578	0.111852	0	0.190882	0.886215	-30.6883
25	Alum Shale	Shale	ADC-5	210.838	211.018	72.07	499.583	0.0193639	4.71522	4.73459	0.1677	2.14925	5.18487	438.109	0.0508792	0.101758	0	0.245482	1.33757	-30.5873
25	Alum Shale	Shale	ADC-6	210.988	211.168	72.22	499.613	0.0298499	4.62076	4.65061	0.184168	4.59829	5.47537	463.13	0.0621179	0.213849	0	0.254638	1.46892	-30.7516
25	Alum Shale	Shale	ADC-7	211.128	211.308	72.36	499.64	0.0184387	3.93243	3.95087	0.0884052	3.35316	3.45362	438.152	0.0448391	0.132479	0	0.136448	0.70512	-30.8748
25	Alum Shale	Shale	ADC-8	211.248	211.428	72.48	499.664	0.019014	4.61255	4.63156	0.152751	2.86244	3.92905	470.174	0.0367133	0.132576	0	0.181976	1.21834	-30.8941
25	Alum Shale	Shale	ADC-9	211.388	211.568	72.62	499.692	0.0210032	5.85539	5.87639	0.144557	2.77873	2.32314	456.196	0.0449045	0.163289	0	0.136517	1.15298	-30.7171
25	Alum Shale	Shale	ADC-10	211.538	211.718	72.77	499.722	0.0190671	2.96827	2.98734	0.133807	4.44439	4.571	463.217	0.0520863	0.132769	0	0.136551	1.06725	-30.614
25	Alum Shale	Shale	ADC-11	211.658	211.838	72.89	499.746	0.0225634	4.83405	4.85661	0.131331	3.57754	2.62487	398.239	0.0562124	0.173747	0	0.12748	1.04749	-30.5429
25	Alum Shale	Shale	ADC-12	211.808	211.988	73.04	499.776	0.0183996	2.83624	2.85464	0.103641	4.29946	5.42401	415.261	0.048071	0.122734	0	0.154836	0.826642	-30.1346
25	Alum Shale	Shale	ADC-13	211.958	212.138	73.19	499.805	0.016215	0.739	0.755215	0.299619	10.8423	18.0948	424.283	0.0685765	0.0818824	0	0.136654	2.38976	-30.8303
25	Alum Shale	Shale	ADC-14	212.158	212.338	73.39	499.846	0.0214044	2.78509	2.8065	0.117227	5.10951	5.19514	414.304	0.0665778	0.143398	0	0.145802	0.934999	-30.5803
25	Alum Shale	Shale	ADC-15	212.308	212.488	73.54	499.875	0.0167389	1.97706	1.99379	0.176068	5.65514	7.31461	402.326	0.0410007	0.112752	0	0.145838	1.40432	-30.6356
25	Alum Shale	Shale	ADC-16	212.458	212.638	73.69	499.906	0.0232128	1.79466	1.81787	0.148292	9.02822	8.52602	418.348	0.0646229	0.164122	0	0.154992	1.18278	-30.4761
26	Alum Shale	Shale	ADC-17	212.608	212.788	73.84	499.936	0.0175331	1.90528	1.92282	0.0988922	5.33854	7.11415	416.37	0.0636432	0.10265	0	0.136792	0.788764	-30.7822
26	Alum Shale	Shale	ADC-18	212.758	212.938	73.99	499.966	0.0172952	1.62037	1.63767	0.187283	6.27262	7.79797	406.391	0.0636893	0.102725	0	0.127705	1.49377	-28.4643
26	Alum Shale	Shale	ADC-19	212.928	213.108	74.16	500	0.0130608	0.155641	0.168702	0.574387	18.2806	189.294	416.413	0.0215878	0.0308397	0	0.319343	4.58131	-31.2011
26	Alum Shale	Shale	ADC-20	213.088	213.268	74.32	500.032	0.0256702	5.79925	5.82492	0.0971282	3.17896	2.50685	371.435	0.0761263	0.185172	0	0.146022	0.774695	-30.8751
26	Alum Shale	Shale	ADC-21	213.238	213.418	74.47	500.062	0.0173057	2.49697	2.51428	0.0794067	4.09453	6.17225	419.457	0.0545623	0.102948	0	0.155187	0.633348	-29.2697
26	Alum Shale	Shale	ADC-22	213.388	213.568	74.62	500.093	0.0121152	0.186763	0.198879	0.108702	25.9007	68.8683	300.478	0.0494506	0.051511	0	0.136964	0.867005	-31.2087
26	Alum Shale	Shale	ADC-23	213.538	213.718	74.77	500.123	0.0234403	2.42553	2.44897	0.116115	7.57761	4.47531	602.5	0.0608268	0.185573	0	0.109599	0.92613	-31.2331
26	Alum Shale	Shale	ADC-24	213.688	213.868	74.92	500.153	0.0270764	5.64136	5.66844	0.320274	3.09415	4.99612	606.522	0.0577756	0.17539	0	0.283202	2.55451	-30.9195
26	Alum Shale	Limestone	ADC-25	213.838	214.018	75.07	500.183	0.0101888	2.10711	2.1173	0.0539007	2.92575	5.17895	432.543	0.0247788	0.061947	0	0.109654	0.429912	-30.8011
26	Alum Shale	Limestone	ADC-26	214.008	214.188	75.24	500.218	0.0412329	0.661427	0.70266	8.74968	11.7632	156.095	593.565	0.0537261	0.0826555	0	1.09682	69.7875	-28.7377
26	Alum Shale	Limestone	ADC-27	214.148	214.328	75.38	500.246	0.0245116	0.198257	0.222769	7.99736	13.9239	320.112	401.587	0.0299842	0.0310181	0	0.71311	63.7869	-28.3143
26	Alum Shale	Limestone	ADC-28	214.298	214.478	75.53	500.277	0.0335127	0.105217	0.13873	8.64696	96.957	533.932	435.609	0.025867	0.134508	0	0.740723	68.9681	-27.9484
26	Alum Shale	Shale	ADC-29	214.458	214.638	75.69	500.309	0.0253547	0.0737528	0.0991075	9.32324	41.7899	756.811	410.63	0.0176022	0.0414169	0	0.750056	74.3622	-28.1949
26	Alum Shale	Limestone	ADC-30	214.608	214.788	75.84	500.34	0.0233574	0.233436	0.256793	2.44656	24.2102	231.59	397.652	0.0238318	0.06217	0	0.594706	19.5138	-28.2852
27	Alum Shale	Limestone	ADC-31	214.758	214.938	75.99	500.37	0.0198057	0.0774844	0.0972901	9.0268	52.7166	515.412	495.348	0.0225667	0.051288	0	0.501445	71.9978	-27.8187
27	Alum Shale	Limestone	ADC-32	214.918	215.098	76.15	500.403	0.027314	0.206057	0.233371	4.52371	13.2053	363.509	392.391	0.0195177	0.0308174	0	0.848325	36.0811	-27.6172
27	Alum Shale	Shale	ADC-33	215.068	215.248	76.3	500.433	0.0227951	0.120113	0.142908	5.02024	28.7943	453.419	383.435	0.0205747	0.0411493	0	0.647972	40.0414	-30.8056
27	Alum Shale	Shale	ADC-34	215.218	215.398	76.45	500.464	0.0275922	4.07834	4.10594	0.0815937	5.77093	3.33577	605.478	0.0504808	0.236951	0	0.136964	0.650791	-30.6578	Mean of the above and below Corg values
27	Alum Shale	Shale	ADC-35	215.388	215.568	76.62	500.499	0.0168157	3.2057	3.22252	0.0868201	3.52171	5.10284	601.522	0.035078	0.113488	0	0.16444	0.692477	-30.51
27	Alum Shale	Shale	ADC-36	215.538	215.718	76.77	500.529	0.0139978	3.32405	3.33805	0.146494	2.47616	5.20252	450.565	0.0289294	0.0826555	0	0.173663	1.16843	-30.73
27	Alum Shale	Shale	ADC-37	215.688	215.868	76.92	500.56	0.0168804	3.619	3.63588	0.0715954	3.13032	3.7727	441.609	0.0444913	0.113815	0	0.137171	0.571045	-30.68
27	Alum Shale	Shale	ADC-38	215.848	216.028	77.08	500.593	0.0304822	5.42788	5.45837	0.149287	4.36611	4.35812	605.652	0.0507722	0.238318	0	0.237882	1.19071	-30.9
27	Alum Shale	Shale	ADC-39	215.998	216.178	77.23	500.624	0.0252063	5.33846	5.36367	0.102304	3.48227	3.9253	604.696	0.0477321	0.186778	0	0.21054	0.815979	-30.88
27	Alum Shale	Shale	ADC-40	216.148	216.328	77.38	500.655	0.0187953	5.03896	5.05776	0.10806	2.67091	3.62157	606.739	0.0311742	0.135088	0	0.18317	0.861886	-30.86
27	Alum Shale	Shale	ADC-41	216.278	216.458	77.51	500.681	0.0188579	3.74591	3.76477	0.134359	3.04053	6.08477	435.783	0.0374626	0.114469	0	0.229077	1.07164	-30.84
27	Alum Shale	Shale	ADC-42	216.448	216.628	77.68	500.716	0.0215117	4.15685	4.17836	0.246207	3.74111	4.60758	604.826	0.0396003	0.156317	0	0.192521	1.96375	-30.84
27	Alum Shale	Shale	ADC-43	216.598	216.778	77.83	500.747	0.0259163	3.6595	3.68541	0.42912	5.38024	6.22201	601.87	0.0386132	0.198284	0	0.229307	3.42266	-30.86
27	Alum Shale	Shale	ADC-44	216.758	216.938	77.99	500.78	0.0281359	4.5829	4.61104	0.239228	4.53298	4.57745	411.913	0.0606151	0.209017	0	0.211068	1.90808	-30.78
27	Alum Shale	Shale	ADC-45	216.908	217.088	78.14	500.811	0.0212519	5.34425	5.3655	0.0945014	2.92584	3.4224	442.957	0.0387232	0.156986	0	0.183629	0.753743	-30.92
28	Alum Shale	Shale	ADC-46	217.058	217.238	78.29	500.842	0.0663933	5.10762	5.17402	0.129242	10.0841	4.54916	389	0.200826	0.521753	0	0.235375	1.03084	-30.82
28	Alum Shale	Shale	ADC-47	217.218	217.398	78.45	500.875	0.0754904	7.02842	7.10391	0.114225	9.01002	4.24564	606	0.170355	0.640064	0	0.301607	0.911058	-30.85
28	Alum Shale	Shale	ADC-48	217.338	217.518	78.57	500.9	0.0722814	5.56625	5.63854	0.143521	9.78257	4.68547	607	0.232457	0.551593	0	0.264192	1.14473	-30.91
28	Alum Shale	Shale	ADC-49	217.488	217.668	78.72	500.931	0.0492505	6.16043	6.20968	0.255694	6.18796	5.32391	607	0.100497	0.384252	0	0.330598	2.03941	-30.87
28	Alum Shale	Shale	ADC-50	217.638	217.818	78.87	500.962	0.0538591	6.59484	6.6487	0.155214	6.52213	4.12442	607	0.125163	0.433636	0	0.27422	1.23799	-30.87
28	Alum Shale	Shale	ADC-51	217.788	217.968	79.02	500.993	0.043816	5.61011	5.65393	0.382905	5.92819	4.85533	605	0.102524	0.335176	0	0.274517	3.05405	-30.89
28	Alum Shale	Shale	ADC-52	217.938	218.118	79.17	501.024	0.0515276	6.28723	6.33876	0.147862	6.22258	4.33544	405	0.13608	0.394435	0	0.274813	1.17935	-30.85
28	Alum Shale	Shale	ADC-53	218.098	218.278	79.33	501.058	0.051326	5.80509	5.85641	0.934476	5.55799	10.0431	406	0.0996224	0.325499	0	0.588166	7.45338	-30.8
28	Alum Shale	Shale	ADC-54	218.258	218.438	79.49	501.092	0.0429869	5.61443	5.65742	0.099976	5.4063	3.02155	395	0.155888	0.305857	0	0.170942	0.797408	-30.72
28	Alum Shale	Shale	ADC-55	218.388	218.568	79.62	501.119	0.0364076	4.73102	4.76743	0.137789	5.7963	5.38421	407	0.0779659	0.276335	0	0.256689	1.09901	-30.95
28	Alum Shale	Shale	ADC-56	218.538	218.718	79.77	501.151	0.0260855	4.67341	4.69949	0.184144	3.99118	5.26541	607	0.0454105	0.187565	0	0.247447	1.46873	-30.92
28	Alum Shale	Shale	ADC-57	218.648	218.828	79.88	501.174	0.0442949	5.38571	5.43	0.235389	5.81928	5.61469	607	0.117508	0.315987	0	0.304878	1.87746	-30.98
28	Alum Shale	Shale	ADC-58	218.798	218.978	80.03	501.205	0.0470303	5.15356	5.20059	0.293292	7.59709	4.95169	607	0.0869205	0.395093	0	0.257517	2.3393	-30.87
28	Alum Shale	Shale	ADC-59	218.938	219.118	80.17	501.235	0.0263407	5.86702	5.89336	0.209444	3.35295	3.88826	607	0.0444604	0.197602	0	0.229149	1.67052	-30.93
28	Alum Shale	Shale	ADC-60	219.088	219.268	80.32	501.268	0.0294936	5.80076	5.83025	0.11705	4.23774	3.2788	607	0.045461	0.247071	0	0.191162	0.933591	-31
29	Alum Shale	Shale	ADC-61	219.248	219.428	80.48	501.302	0.0421996	6.35506	6.39726	0.297717	4.63585	5.23492	411	0.101821	0.296567	0	0.334891	2.37459	-30.97
29	Alum Shale	Shale	ADC-62	219.418	219.598	80.65	501.338	0.0411806	6.37855	6.41973	0.136815	5.23702	3.87932	607	0.0781177	0.336203	0	0.249042	1.09124	-31.03
29	Alum Shale	Shale	ADC-63	219.568	219.748	80.8	501.37	0.0590215	5.85396	5.91298	0.222129	8.0293	5.18927	606	0.135508	0.474771	0	0.306841	1.7717	-31.03
29	Alum Shale	Shale	ADC-64	219.718	219.898	80.95	501.403	0.0461617	5.97401	6.02017	0.0919715	6.57377	3.50784	602	0.091023	0.395752	0	0.211178	0.733564	-30.96
29	Alum Shale	Shale	ADC-65	219.878	220.058	81.11	501.438	0.0511545	5.87997	5.93112	0.154564	7.17489	4.05034	608	0.111831	0.425552	0	0.24023	1.2328	-30.96
29	Alum Shale	Shale	ADC-66	220.028	220.208	81.26	501.471	0.0516293	6.48871	6.54034	0.327379	6.0543	4.85359	607	0.121761	0.395972	0	0.317441	2.61118	-31
29	Alum Shale	Shale	ADC-67	220.178	220.358	81.41	501.504	0.0457954	6.15078	6.19657	0.576813	5.27336	6.52693	414	0.092089	0.326767	0	0.404446	4.60066	-31
29	Alum Shale	Shale	ADC-68	220.338	220.518	81.57	501.539	0.0297721	6.41487	6.44464	0.212794	3.53488	3.88908	463	0.0485334	0.22781	0	0.250637	1.69724	-31.11
29	Alum Shale	Shale	ADC-69	220.488	220.668	81.72	501.572	0.0645051	5.66009	5.72459	1.22487	7.61507	7.92292	606	0.192206	0.435931	0	0.453555	9.76958	-30.9305
29	Alum Shale	Shale	ADC-70	220.648	220.828	81.88	501.608	0.0302749	4.72196	4.75223	0.1571	5.00494	4.0656	607	0.0634258	0.237847	0	0.193207	1.25303	-30.9875
29	Alum Shale	Shale	ADC-71	220.868	221.048	82.1	501.657	0.0335007	5.23425	5.26775	0.289931	4.70458	5.50741	606	0.0604694	0.247826	0	0.290116	2.31249	-30.8026
29	Alum Shale	Shale	ADC-72	221.018	221.198	82.25	501.69	0.025907	4.69754	4.72345	0.109616	3.9886	4.71388	415	0.0505704	0.1884	0	0.222658	0.8743	-30.7841
30	Alum Shale	Shale	ADC-73	221.168	221.348	82.4	501.723	0.0548015	5.21508	5.26988	0.195681	8.28129	4.96513	605	0.137867	0.436414	0	0.261657	1.56075	-30.994
30	Alum Shale	Shale	ADC-74	221.318	221.498	82.55	501.758	0.0352238	6.16679	6.20201	0.248764	4.31914	4.22335	422	0.0704409	0.267874	0	0.261933	1.98414	-30.9225
30	Alum Shale	Shale	ADC-75	221.468	221.648	82.7	501.793	0.0335512	4.44276	4.47631	0.360842	4.43401	7.37637	314	0.0972552	0.19848	0	0.330189	2.87808	-30.9825
30	Alum Shale	Shale	ADC-76	221.618	221.798	82.85	501.828	0.0445308	6.04779	6.09232	0.118097	6.16109	3.75782	607	0.0859362	0.375354	0	0.228939	0.941943	-30.8792
30	Alum Shale	Shale	ADC-77	221.858	222.038	83.09	501.883	0.0450083	5.20635	5.25136	0.148382	6.39924	4.734	328	0.124535	0.336047	0	0.248599	1.1835	-30.8107
30	Alum Shale	Shale	ADC-78	222.008	222.188	83.24	501.919	0.0318749	5.21646	5.24834	0.112851	4.14559	3.28695	386	0.109776	0.217575	0	0.17251	0.9001	-30.9115
30	Alum Shale	Shale	ADC-79	222.158	222.338	83.39	501.956	0.0369594	5.52411	5.56107	0.0883996	4.98252	3.62758	322	0.101926	0.277081	0	0.201732	0.705076	-30.9603
30	Alum Shale	Shale	ADC-80	222.278	222.458	83.51	501.985	0.0410184	6.27929	6.32031	0.199247	4.54332	3.19925	395	0.140605	0.287152	0	0.202202	1.58919	-30.9234
30	Alum Shale	Shale	ADC-81	222.428	222.608	83.66	502.021	0.0356911	5.80381	5.8395	0.225163	4.58105	3.30545	391	0.0990779	0.26751	0	0.193022	1.7959	-30.7315
30	Alum Shale	Shale	ADC-82	222.578	222.758	83.81	502.058	0.0336816	5.11258	5.14626	0.204707	5.00867	3.94739	606	0.0812932	0.257759	0	0.203143	1.63274	-30.8812
30	Alum Shale	Shale	ADC-83	222.718	222.898	83.95	502.09	0.0399515	5.22994	5.26989	0.143469	5.8353	3.67972	322	0.11011	0.307514	0	0.193917	1.14431	-30.9025
30	Alum Shale	Shale	ADC-84	222.868	223.048	84.1	502.124	0.0373625	6.89482	6.93218	0.220762	4.15236	4.20571	417	0.0665031	0.287849	0	0.291548	1.76079	-30.9492
30	Alum Shale	Shale	ADC-85	223.018	223.198	84.25	502.158	0.0589504	5.05968	5.11863	0.193627	9.3136	4.37685	387	0.159903	0.476729	0	0.224035	1.54437	-30.895
30	Alum Shale	Shale	ADC-86	223.178	223.358	84.41	502.194	0.0348402	5.89282	5.92766	0.175907	4.69426	4.61169	420	0.0516769	0.27826	0	0.273365	1.40304	-30.9233
31	Alum Shale	Shale	ADC-87	223.328	223.508	84.56	502.227	0.0720117	5.12281	5.19483	0.404925	9.1881	8.47659	408	0.245614	0.477306	0	0.440344	3.22969	-31.0333
31	Alum Shale	Shale	ADC-88	223.468	223.648	84.7	502.258	0.055699	4.86962	4.92531	0.195876	8.48464	5.37653	404	0.166163	0.417895	0	0.264811	1.56231	-31.0576
31	Alum Shale	Shale	ADC-89	223.588	223.768	84.82	502.283	0.0524963	4.38756	4.44005	0.595094	7.84802	8.41315	403	0.161286	0.348456	0	0.373548	4.74647	-31.0604
31	Alum Shale	Shale	ADC-90	223.708	223.888	84.94	502.309	0.0488863	5.49596	5.54484	0.513959	6.10847	6.57451	410	0.130501	0.338705	0	0.364546	4.09934	-30.9583
31	Alum Shale	Shale	ADC-91	223.858	224.038	85.09	502.341	0.0292857	4.64354	4.67282	0.303537	5.52947	3.10985	606.891	0.0467076	0.258382	0	0.145318	2.42101	-30.9479
31	Alum Shale	Shale	ADC-92	224.008	224.188	85.24	502.373	0.0448518	6.6542	6.69905	0.535437	6.53059	2.46119	604.87	0.0487202	0.437487	0	0.164876	4.27065	-31.1302
31	Alum Shale	Shale	ADC-93	224.158	224.338	85.39	502.404	0.0244348	5.51436	5.53879	0.327436	3.2329	3.33064	466.848	0.0547139	0.179064	0	0.184477	2.61163	-31.0097
31	Alum Shale	Shale	ADC-94	224.308	224.488	85.54	502.436	0.0371686	4.79236	4.82952	0.116593	7.2131	2.81769	605.826	0.054742	0.348358	0	0.136081	0.929942	-30.8985
31	Alum Shale	Shale	ADC-95	224.448	224.628	85.68	502.465	0.0302993	4.2762	4.3065	0.106359	5.31843	3.84126	400.804	0.0816572	0.229038	0	0.165424	0.848322	-31.0349
31	Alum Shale	Shale	ADC-96	224.598	224.778	85.83	502.496	0.0296858	5.3658	5.39549	0.230625	4.98581	2.5277	603.783	0.0438385	0.269009	0	0.136382	1.83946	-31.0102
31	Alum Shale	Shale	ADC-97	224.748	224.928	85.98	502.527	0.0412393	5.93683	5.97807	0.217921	6.50322	2.61015	605.761	0.0568198	0.388767	0	0.156037	1.73813	-30.9835
31	Alum Shale	Shale	ADC-98	224.908	225.088	86.14	502.56	0.030743	6.31902	6.34976	0.207508	4.86913	1.6913	603.739	0.0259311	0.309178	0	0.107393	1.65508	-30.8101
31	Alum Shale	Shale	ADC-99	225.058	225.238	86.29	502.592	0.0224573	5.28461	5.30707	0.243951	3.19642	3.49914	460.717	0.0399144	0.169636	0	0.185702	1.94575	-30.7376
31	Alum Shale	Shale	ADC-100	225.208	225.388	86.44	502.623	0.0303453	5.09682	5.12716	0.138295	6.03637	1.90837	604.696	0.0239609	0.309495	0	0.0978451	1.10304	-30.7292
31	Alum Shale	Shale	ADC-101	225.318	225.498	86.55	502.645	0.0274054	4.7923	4.81971	0.255868	4.97398	3.25173	603.674	0.0389563	0.239731	0	0.156724	2.0408	-30.6842
32	Alum Shale	Shale	ADC-102	225.428	225.608	86.66	502.668	0.0343252	5.34566	5.37998	0.149386	4.82978	3.09856	407.652	0.0989396	0.259841	0	0.166702	1.1915	-30.5995
32	Alum Shale	Shale	ADC-103	225.548	225.728	86.78	502.693	0.0260462	4.75223	4.77828	0.233065	4.18519	3.49257	472.63	0.0589941	0.19998	0	0.166884	1.85893	-30.6872
32	Alum Shale	Shale	ADC-104	225.658	225.838	86.89	502.715	0.0269829	6.72022	6.7472	0.1488	3.55849	1.89348	475.609	0.0430176	0.240098	0	0.127757	1.18683	-30.8292
32	Alum Shale	Shale	ADC-105	225.768	225.948	87	502.738	0.0400799	6.0298	6.06988	0.108935	3.79269	2.43124	293.587	0.204188	0.230212	0	0.147573	0.868862	-30.9427
32	Alum Shale	Shale	ADC-106	225.878	226.058	87.11	502.761	0.023632	5.73719	5.76082	0.118761	3.82436	1.70964	605.565	0.0320458	0.220315	0	0.0984895	0.947237	-31.0327
32	Alum Shale	Shale	ADC-107	226.028	226.208	87.26	502.792	0.0283609	5.27204	5.3004	0.110113	4.91481	2.41823	603.543	0.0390757	0.260505	0	0.128176	0.878264	-30.9719
32	Alum Shale	Shale	ADC-108	226.178	226.358	87.41	502.823	0.0613994	5.42931	5.49071	0.192361	8.03318	3.77509	328.522	0.230564	0.441078	0	0.207279	1.53427	-31.0507
32	Alum Shale	Shale	ADC-109	226.308	226.488	87.54	502.849	0.0419304	5.29902	5.34095	0.169584	5.07025	4.44019	398.5	0.156462	0.270799	0	0.237148	1.3526	-31.0602
32	Alum Shale	Shale	ADC-110	226.458	226.638	87.69	502.88	0.0221872	5.43076	5.45295	0.143614	3.68047	1.81405	468.478	0.034118	0.200694	0	0.0989192	1.14547	-31.2438
32	Alum Shale	Shale	ADC-111	226.608	226.788	87.84	502.911	0.0169703	5.18476	5.20173	0.14819	2.31611	2.0941	470.457	0.0481911	0.120478	0	0.108929	1.18196	-31.2054
32	Alum Shale	Shale	ADC-112	226.748	226.928	87.98	502.94	0.0418746	5.10993	5.15181	0.454997	5.06944	6.54247	399.435	0.132593	0.261168	0	0.337055	3.62905	-31.3544
32	Alum Shale	Shale	ADC-113	226.898	227.078	88.13	502.971	0.0189929	4.82649	4.84548	0.0842396	3.31856	2.25293	469.413	0.03216	0.1608	0	0.109166	0.671895	-31.3689
32	Alum Shale	Shale	ADC-114	227.058	227.238	88.29	503.004	0.0287254	4.92624	4.95497	0.14453	4.26153	3.40856	383.391	0.0794354	0.211157	0	0.168893	1.15277	-31.5006
32	Alum Shale	Shale	ADC-115	227.208	227.388	88.44	503.035	0.0199756	4.31131	4.33128	0.162093	3.48403	2.9851	460.37	0.047283	0.150903	0	0.129293	1.29285	-31.5039
33	Alum Shale	Shale	ADC-116	227.358	227.538	88.59	503.067	0.0224315	4.43557	4.458	0.263809	4.06406	4.02006	604.348	0.030196	0.181176	0	0.179214	2.10414	-31.5907
33	Alum Shale	Shale	ADC-117	227.508	227.688	88.74	503.098	0.0248318	3.92358	3.94841	0.197204	4.80913	3.7253	405.652	0.0609628	0.189884	0	0.14709	1.5729	-31.5777
33	Alum Shale	Shale	ADC-118	227.638	227.818	88.87	503.125	0.0299532	5.35834	5.3883	0.232636	3.52761	2.18863	291.609	0.132054	0.190078	0	0.11793	1.8555	-31.5719
33	Alum Shale	Shale	ADC-119	227.768	227.948	89	503.152	0.0160945	4.05813	4.07423	0.388141	2.45797	4.83476	442.565	0.0290415	0.100143	0	0.196979	3.09582	-31.6241
33	Alum Shale	Limestone	ADC-120	227.938	228.118	89.17	503.188	0.026278	0.975329	1.00161	9.59245	8.00674	62.084	604.522	0.0320784	0.0801961	0	0.621837	76.5093	-31.6437
33	Alum Shale	Limestone	ADC-121	228.088	228.268	89.26	503.206	0.0269671	0.816418	0.843386	9.24911	9.5185	77.4102	605.478	0.0301041	0.0802777	0	0.652866	73.7709	-31.6917
33	Alum Shale	Shale	ADC-122	228.238	228.418	89.29	503.213	0.014439	4.19753	4.21197	0.0956268	2.86182	2.11826	462.435	0.0241078	0.120539	0	0.0892206	0.762719	-31.7093
33	Alum Shale	Shale	ADC-123	228.405	228.585	89.4	503.236	0.0244485	4.71967	4.74411	0.202197	4.02704	3.35064	419.391	0.0512811	0.191047	0	0.158958	1.61272	-31.6851
33	Alum Shale	Shale	ADC-124	228.575	228.755	89.57	503.271	0.0202805	5.14755	5.16783	0.604611	2.33723	5.20183	434.348	0.0352286	0.120784	0	0.268822	4.82237	-31.6193
33	Alum Shale	Shale	ADC-125	228.735	228.915	89.73	503.306	0.0226669	5.60913	5.6318	0.104542	3.39918	2.12604	448.304	0.0423172	0.191435	0	0.119734	0.833828	-31.769
33	Alum Shale	Shale	ADC-126	228.895	229.075	89.89	503.34	0.0208114	5.25833	5.27915	0.118094	3.05677	2.65176	450.261	0.0433686	0.161372	0	0.13999	0.941918	-31.9025
33	Alum Shale	Shale	ADC-127	229.065	229.245	90.06	503.377	0.028546	5.59333	5.62188	0.139838	3.95082	2.49545	422.217	0.0757194	0.22211	0	0.140291	1.11535	-31.9383
33	Alum Shale	Shale	ADC-128	229.225	229.405	90.22	503.411	0.0305217	4.46208	4.4926	4.30185	4.49901	9.1647	604.174	0.0303184	0.202123	0	0.411734	34.3116	-31.7921
33	Alum Shale	Limestone	ADC-129	229.385	229.565	90.38	503.446	0.0282666	5.56459	5.59286	0.22955	3.25583	3.77873	411.13	0.0890237	0.182094	0	0.211339	1.83089	-29.8257
34	Alum Shale	Limestone	ADC-130	229.545	229.725	90.54	503.482	0.0154414	0.214432	0.229874	8.58319	13.2158	188.654	394.087	0.0131645	0.0303796	0	0.433665	68.4595	-30.0325
34	Alum Shale	Limestone	ADC-131	229.695	229.875	90.69	503.515	0.0121858	0.0520773	0.0642631	9.73186	47.3214	503.267	326.043	0.0101367	0.0304102	0	0.323415	77.6213	-31.1374
34	Alum Shale	Limestone	ADC-132	229.845	230.025	90.84	503.549	0.0166925	0.219319	0.236011	9.43561	21.4701	167.857	570	0.0202687	0.0506718	0	0.396161	75.2585	-30.9793
34	Alum Shale	Shale	ADC-133	229.975	230.155	90.97	503.579	0.0156303	0.286375	0.302005	8.91222	10.071	146.859	379	0.012166	0.030415	0	0.443522	71.0839	-32.8753
34	Alum Shale	Shale	ADC-134	230.125	230.305	91.12	503.612	0.0238281	3.67248	3.69631	0.326624	4.66463	6.26778	607	0.0385407	0.172419	0	0.231676	2.60515	-32.8257
34	Alum Shale	Shale	ADC-135	230.275	230.455	91.27	503.646	0.015417	4.31449	4.3299	0.0539494	3.28062	1.50254	604	0.0223218	0.142048	0	0.0650584	0.430301	-32.8867
34	Alum Shale	Shale	ADC-136	230.405	230.585	91.4	503.676	0.0367179	3.53973	3.57645	1.30162	6.81138	12.5099	606	0.0517661	0.243605	0	0.447411	10.3817	-32.7701	Mean of the above and below Corg values
34	Alum Shale	Shale	ADC-137	230.555	230.735	91.55	503.709	0.017467	4.26833	4.2858	0.132917	3.31697	2.18117	604	0.0375705	0.142159	0	0.0934806	1.06014	-32.6534
34	Alum Shale	Shale	ADC-138	230.705	230.885	91.7	503.743	0.0182582	4.38292	4.40117	0.213459	3.00047	3.62122	607	0.0355535	0.132056	0	0.159376	1.70255	-32.801
34	Alum Shale	Shale	ADC-139	230.825	231.005	91.82	503.77	0.0206784	3.63018	3.65086	0.393821	3.61853	7.46836	606	0.0274377	0.132107	0	0.27266	3.14112	-32.83
34	Alum Shale	Shale	ADC-140	230.975	231.155	91.97	503.804	0.0162529	4.73878	4.75503	0.114199	2.56555	2.57785	605	0.033548	0.121993	0	0.122578	0.910852	-32.7904
34	Alum Shale	Shale	ADC-141	231.125	231.305	92.12	503.836	0.0162582	4.12375	4.14001	0.091588	2.94783	2.51247	474	0.0396631	0.12204	0	0.104017	0.730506	-32.7426
34	Alum Shale	Shale	ADC-142	231.265	231.445	92.26	503.867	0.0148625	3.90935	3.92421	0.176075	2.33336	3.86648	456	0.0376438	0.091566	0	0.151729	1.40437	-32.6937
34	Alum Shale	Shale	ADC-143	231.415	231.595	92.41	503.899	0.0199115	4.25947	4.27938	0.0725893	3.56756	2.2223	402	0.0559788	0.152669	0	0.0951007	0.578972	-32.8158
34	Alum Shale	Shale	ADC-144	231.525	231.705	92.52	503.923	0.0156804	3.6631	3.67878	0.0568791	3.3213	1.81472	460	0.0448005	0.122183	0	0.0667595	0.453667	-32.8591
35	Alum Shale	Shale	ADC-145	231.675	231.855	92.67	503.955	0.0347347	1.17735	1.21209	0.0444728	18.4879	7.89059	366	0.162974	0.22409	0	0.0956407	0.354715	-31.2014
35	Alum Shale	Shale	ADC-146	231.825	232.005	92.82	503.987	0.0153414	3.87008	3.88542	0.0691709	2.36033	3.70271	459	0.0458544	0.0917087	0	0.143866	0.551707	-32.9282
35	Alum Shale	Shale	ADC-147	231.975	232.155	92.97	504.019	0.0368135	4.67131	4.70812	0.0456896	5.84592	2.24716	333	0.133539	0.275233	0	0.105799	0.36442	-32.9224
35	Alum Shale	Shale	ADC-148	232.085	232.265	93.08	504.042	0.0300635	4.40451	4.43458	0.0566612	4.59921	2.39247	327	0.123393	0.203956	0	0.106096	0.45193	-32.9687
35	Alum Shale	Shale	ADC-149	232.235	232.415	93.23	504.074	0.00906334	0.830748	0.839811	0.0401529	6.07383	10.3653	365	0.0295851	0.0510087	0	0.0870487	0.320259	-32.8411
35	Alum Shale	Shale	ADC-150	232.385	232.565	93.38	504.106	0.0207934	2.23078	2.25157	0.0666841	4.53271	5.16924	303	0.110222	0.102057	0	0.116389	0.531873	-32.8997
35	Alum Shale	Shale	ADC-151	232.605	232.785	93.6	504.152	0.0129944	0.655579	0.668573	0.0989923	9.16251	26.1855	338	0.0377758	0.0612581	0	0.17507	0.789563	-32.4896

## Sheet: Biostratigraphy
Fossil ID	Depth core boxes (m)	GR Corrected depth (m)	Adjusted depth (m)
Brachipod indet	215.09	215.27	76.322
Lejopyge lundgreni	215.19	215.37	76.422
Lejopyge lundgreni	215.195	215.375	76.427
Lejopyge lundgreni	215.21	215.39	76.442
Lejopyge lundgreni	215.22	215.4	76.452
Lejopyge lundgreni	216.84	217.02	78.072
Diplagnostus planicauda bilobatus	217.12	217.3	78.352
Brachipod indet	217.12	217.3	78.352
Acadagnostus ferox	217.12	217.3	78.352
Acadagnostus ferox	217.53	217.71	78.762
Acadagnostus ferox	218.47	218.65	79.702
Diplagnostus planicauda bilobatus	218.57	218.75	79.802
Acadagnostus ferox	218.57	218.75	79.802
Diplagnostus planicauda bilobatus	218.65	218.83	79.882
Ptychagnostus punctuosus	218.72	218.9	79.952
Ptychagnostus punctuosus	218.8	218.98	80.032
Ptychagnostus punctuosus	218.84	219.02	80.072
Ptychagnostus punctuosus	218.92	219.1	80.152
Ptychagnostus punctuosus	219.06	219.24	80.292
Ptychagnostus punctuosus	219.36	219.54	80.592
Ptychagnostus punctuosus	219.61	219.79	80.842
Brachipod indet	219.62	219.8	80.852
Acadagnostus ferox	219.62	219.8	80.852
Ptychagnostus punctuosus	219.67	219.85	80.902
Ptychagnostus affinis	? 219.72	229.9	80.952
Doryagnostus incertus	219.75	219.93	80.982
Ptychagnostus punctuosus	220.7	220.88	81.932
? Svenax pusillus	221.19	221.37	82.422
Ptychagnostus affinis	? 221.92	222.1	83.152
Ptychagnostus affinis	222.725	222.905	83.957
Brachipod indet	222.765	222.945	83.997
Ptychagnostus affinis	222.765	222.945	83.997
Ptychagnostus affinis	222.795	222.975	84.027
Ptychagnostus affinis	222.8	222.98	84.032
Ptychagnostus affinis	222.855	223.035	84.087
Ptychagnostus affinis	222.92	223.1	84.152
Ptychagnostus affinis	223.01	223.19	84.242
Ptychagnostus affinis	223.18	223.36	84.232
Ptychagnostus affinis	223.2	223.38	84.252
Ptychagnostus affinis	223.34	223.52	84.572
Ptychagnostus affinis	223.4	223.58	84.632
Ptychagnostus affinis	223.5	223.68	84.732
Ptychagnostus affinis	223.52	223.7	84.752
Ptychagnostus affinis	223.64	223.82	84.872
Ptychagnostus affinis	223.78	223.96	85.012
Ptychagnostus affinis	223.93	224.11	85.162
Ptychagnostus affinis	224.13	224.31	85.362
Diplagnostus planicauda bilobatus	224.51	224.69	85.742
Ptychagnostus affinis	224.57	224.75	85.802
Ptychagnostus affinis	224.6	224.78	85.832
Acidusus atavus	224.67	224.85	85.902
Ptychagnostus affinis	224.67	224.85	85.902
Ptychagnostus affinis	224.73	224.91	85.962
Ptychagnostus affinis	224.795	224.975	86.027
Acidusus atavus	224.84	225.02	86.072
Parasolenopleura linnarssoni	225.05	225.23	86.282
Ptychagnostus affinis	225.05	225.23	86.282
Acadagnostus ferox	225.88	226.06	87.112
Hypagnostus mammillatus/pavifrons	226.95	227.13	88.182
Acidusus atavus	227.815	227.995	89.047
Diplagnostus planicauda bilobatus	228.64	228.82	89.635
Acidusus atavus	228.7	228.88	89.695

## Sheet: XRD
Fraction <2µm
Samples	IS1_IS2	Illite 001	Chlorite 002	Sum		%IS	% Illite	% Chlorite
ADC-18	35	230	129	394		8.88325	58.3756	32.7411
ADC-36	57	201	104	362		15.7459	55.5249	28.7293
ADC-54	47	167	68	282		16.6667	59.2199	24.1135
ADC-72	77	260	160	497		15.493	52.3139	32.1932
ADC-90	76	134	72	282		26.9504	47.5177	25.5319
ADC-108	64	311	140	515		12.4272	60.3883	27.1845
ADC-126	39	99	125	263		14.8289	37.6426	47.5285
ADC-144	53	451	156	660		8.0303	68.3333	23.6364
Appréciation du % smectite dans les interstratifiés
du type illite-smectite selon Reynolds (1989)
References:
MOORE, D.M. & REYNOLDS, R.C. Jr. (1989) "X-ray diffraction and the identification
		and analysis of clay minerals. Ed: Oxford University Press.
Equation:
		(Rolli 1993, after datas from Reynolds 1989)
Sample N°		Pos IS 002	Pos IS 003	∆ (003-002)	%Sm in IS
ADC-18		9.31	17.76	8.45	10.002
ADC-36		9.49	17.45	7.96	17.1174
ADC-54		9.158	17.42	8.262	12.4645
ADC-72		9.34	17.09	7.75	20.8595
ADC-90		9.54	17.53	7.99	16.6167
ADC-108		9.45	17.23	7.78	20.2994
ADC-126		9.34	17.51	8.17	13.7909
ADC-144		9.41	17.21	7.8	19.9308
